# Supplementary material for: Regio- and diastereoselective access to densely functionalized ketones via the Boekelheide rearrangement of isoxazoline N -oxides
Source: Royal Society of Chemistry journal article supplement (doi:10.1039/d2ob00787h), 2022-01-01
Supplement: d2ob00787h1.pdf [file d2ob00787h1.pdf]

## Supporting information

### Regio- and Diastereoselective Access to Densely Functionalized Ketones via Boekelheide Rearrangement of Isoxazoline *N*-oxides

Pavel Yu. Ushakov, Sema L. Ioffe, Alexey Yu. Sukhorukov\*

N. D. Zelinsky Institute of Organic Chemistry, 119991, Leninsky prospect, 47, Moscow, Russian Federation

#### Table of contents

|                                                                             |     |
|-----------------------------------------------------------------------------|-----|
| Structures of starting compounds and intermediates                          | S3  |
| Structures of products                                                      | S4  |
| Optimization study on [4+1]-annulation with benzylsulfonium salt <b>11a</b> | S5  |
| NMR spectra of <b>1b</b>                                                    | S6  |
| NMR spectra of <b>1c</b>                                                    | S7  |
| NMR spectra of <b>1d</b>                                                    | S8  |
| NMR spectra of <b>1e</b>                                                    | S9  |
| NMR spectra of <b>1j</b>                                                    | S10 |
| NMR spectra of <b>6a</b>                                                    | S11 |
| NMR spectra of <b>6b</b>                                                    | S12 |
| NMR spectra of <b>6c</b>                                                    | S13 |
| NMR spectra of <b>6d</b>                                                    | S14 |
| NMR spectra of <b>11b</b>                                                   | S15 |
| NMR spectra of <b>8a</b>                                                    | S19 |
| NMR spectra of <b>8b</b>                                                    | S22 |
| NMR spectra of <b>8c</b>                                                    | S25 |
| NMR spectra of <b>12a</b>                                                   | S28 |
| NMR spectra of <b>13a</b>                                                   | S31 |
| NMR spectra of <b>12b</b>                                                   | S34 |

|                                 |      |
|---------------------------------|------|
| NMR spectra of <b>12c</b>       | S37  |
| NMR spectra of <b>12d</b>       | S40  |
| NMR spectra of <b>12e</b>       | S43  |
| NMR spectra of <b>5a</b>        | S47  |
| NMR spectra of <b>5b</b>        | S51  |
| NMR spectra of <b>5c</b>        | S55  |
| NMR spectra of <b>5d</b>        | S58  |
| NMR spectra of <b>5e</b>        | S61  |
| NMR spectra of <b>5f</b>        | S64  |
| NMR spectra of <b>5g</b>        | S68  |
| NMR spectra of <b>5h</b>        | S72  |
| NMR spectra of <b>5i</b>        | S76  |
| NMR spectra of <b>5j</b>        | S79  |
| NMR spectra of <b>5k</b>        | S84  |
| NMR spectra of <b>10a</b>       | S88  |
| NMR spectra of <b>10b</b>       | S92  |
| NMR spectra of <b>10c</b>       | S95  |
| NMR spectra of <b>10d</b>       | S99  |
| NMR spectra of <b>15a</b>       | S103 |
| NMR spectra of <b>15b</b>       | S106 |
| NMR spectra of <b>15c</b>       | S109 |
| NMR spectra of <b>15d</b>       | S112 |
| NMR spectra of <b>15e</b>       | S115 |
| NMR spectra of <b>16</b>        | S119 |
| NMR spectra of <b>17</b>        | S123 |
| NMR spectra of <b>18a</b>       | S133 |
| NMR spectra of <b>18a + 18b</b> | S140 |
| NMR spectra of <b>19a</b>       | S141 |
| NMR spectra of <b>19b</b>       | S146 |
| NMR spectra of <b>21</b>        | S150 |

## Structures of starting compounds and intermediates

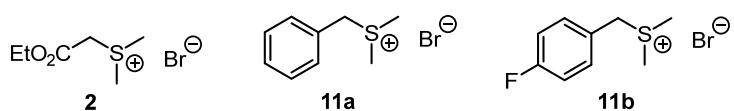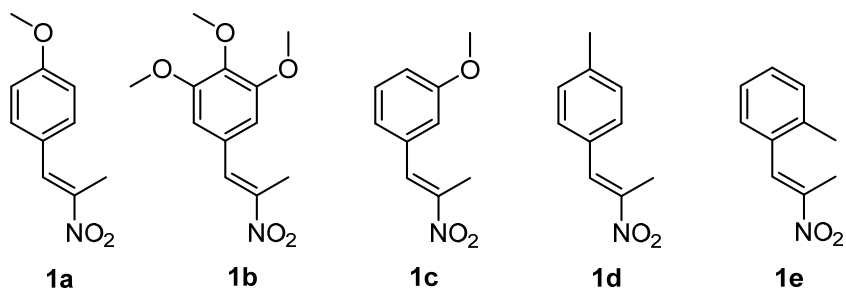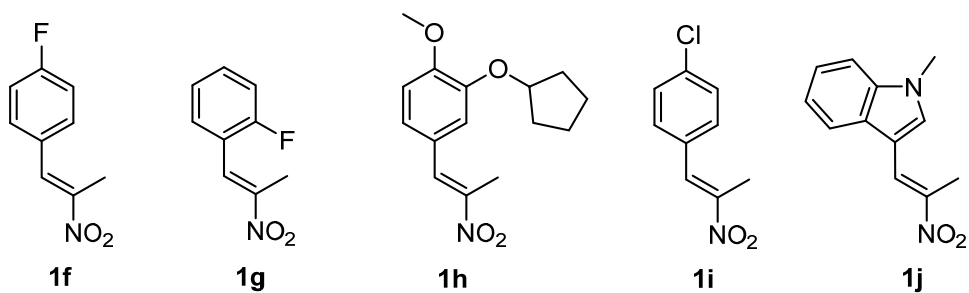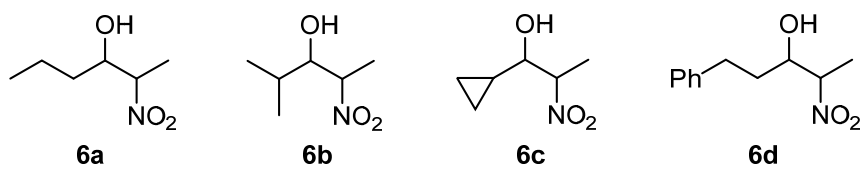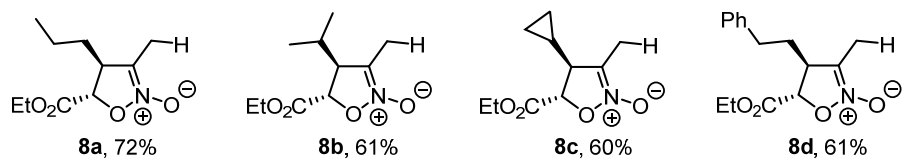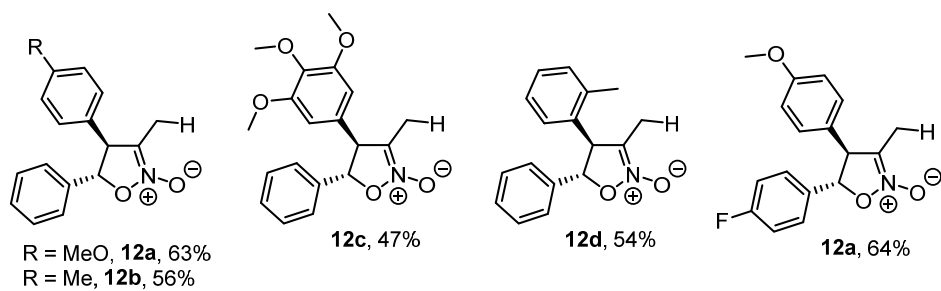

## Structures of products

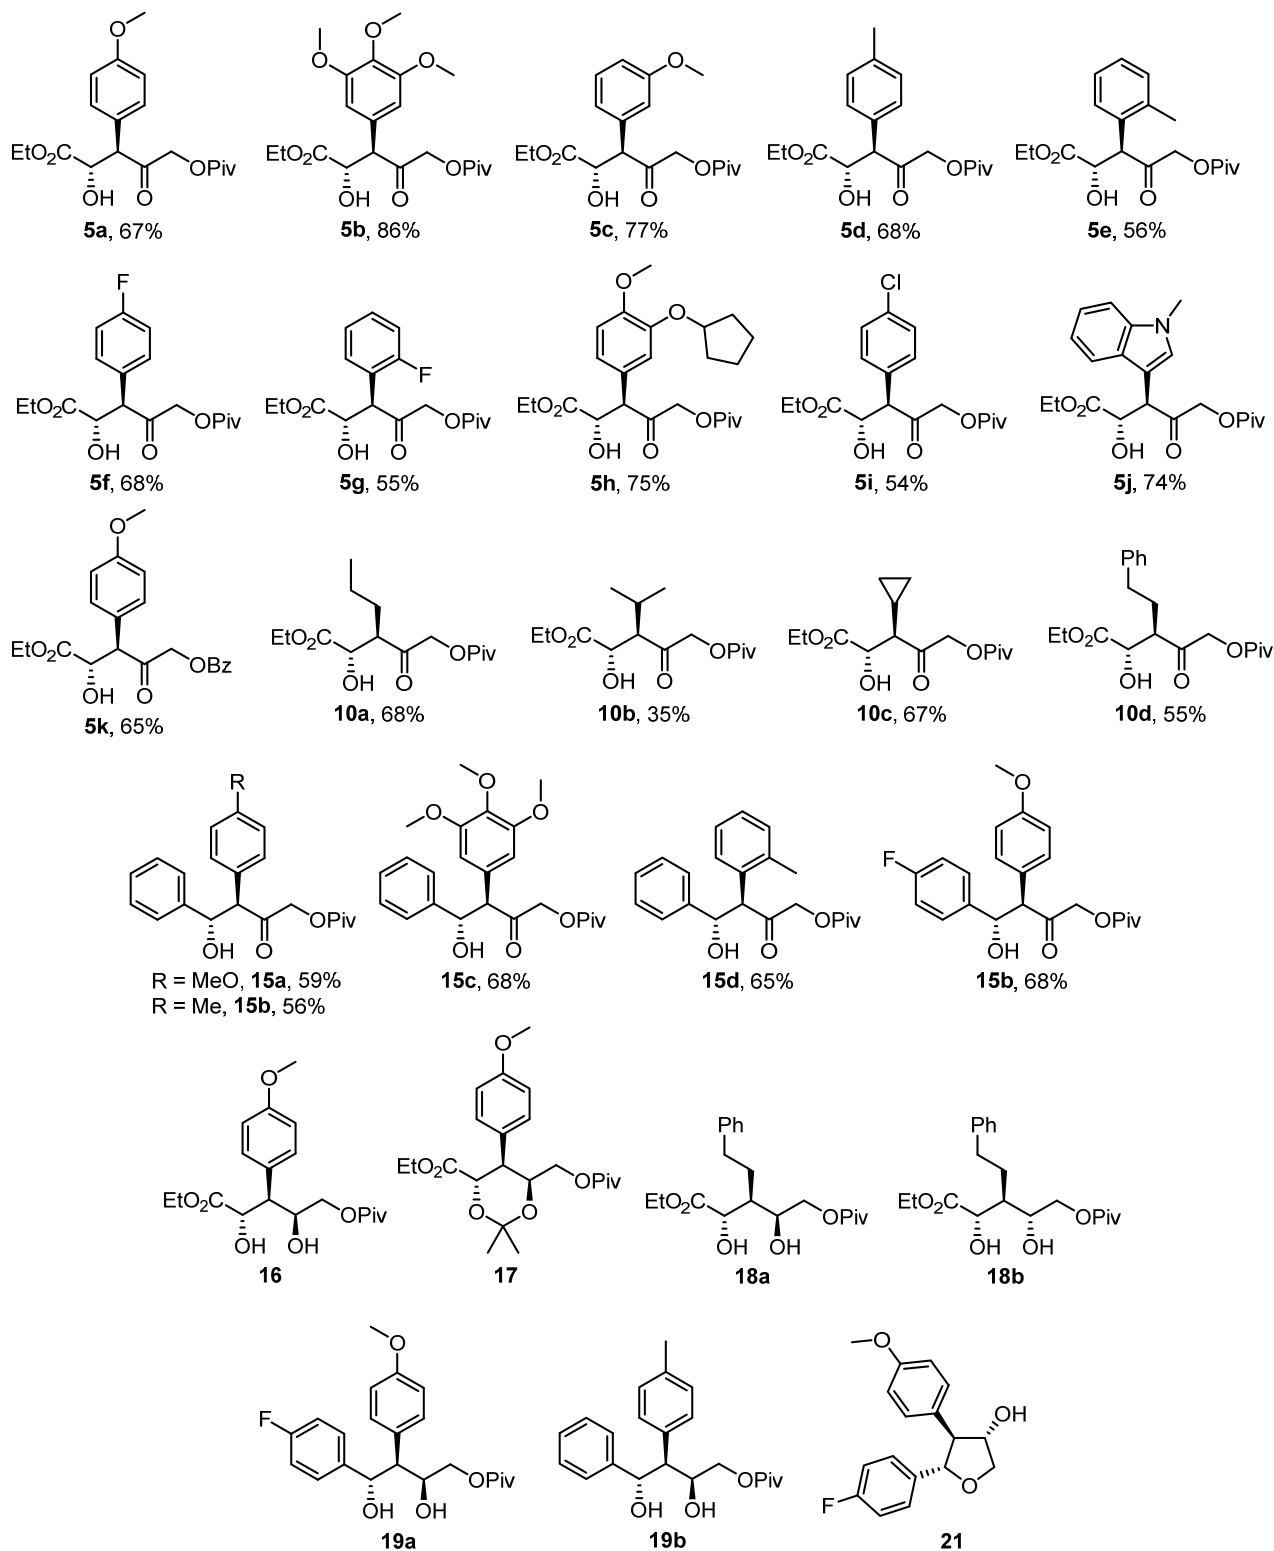

### Optimization study on [4+1]-annulation with benzylsulfonium salt **11a**

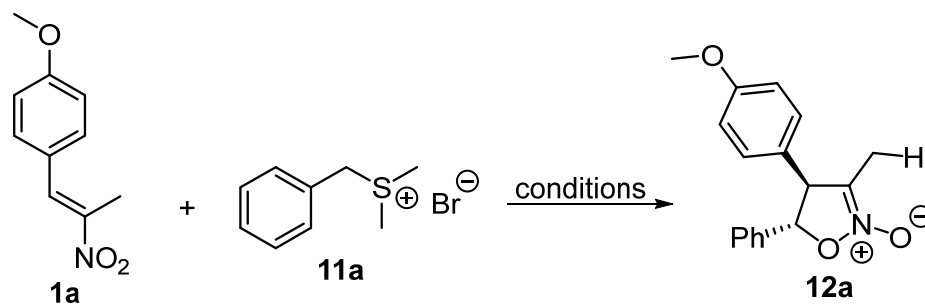

| Entry | Conditions                                                                                               | Solvent                         | Time, h | Yield of <b>12a</b> , % | Recovery of <b>1a</b> , % |
|-------|----------------------------------------------------------------------------------------------------------|---------------------------------|---------|-------------------------|---------------------------|
| 1     | <b>11a</b> (2 equiv.)<br>K <sub>2</sub> CO <sub>3</sub> (3 equiv.)                                       | THF                             | 24      | 13                      | 73                        |
| 2     | <b>11a</b> (2 equiv.)<br>K <sub>2</sub> CO <sub>3</sub> (3 equiv.)                                       | MeCN                            | 24      | 38                      | 13                        |
| 3     | <b>11a</b> (2 equiv.)<br>K <sub>2</sub> CO <sub>3</sub> (3 equiv.)                                       | CH <sub>2</sub> Cl <sub>2</sub> | 24      | 24                      | 43                        |
| 4     | <b>11a</b> (1.3 equiv.)<br>Bu <sub>4</sub> NHSO <sub>4</sub> (0.1 equiv.)<br>50% aq. NaOH<br>(17 equiv.) | CH <sub>2</sub> Cl <sub>2</sub> | 5       | <b>63</b>               | 0                         |

UPY764.100.{1H}/1

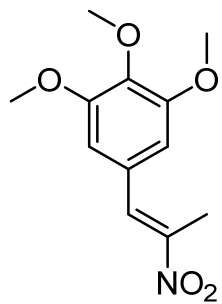

### NMR spectra of 1b

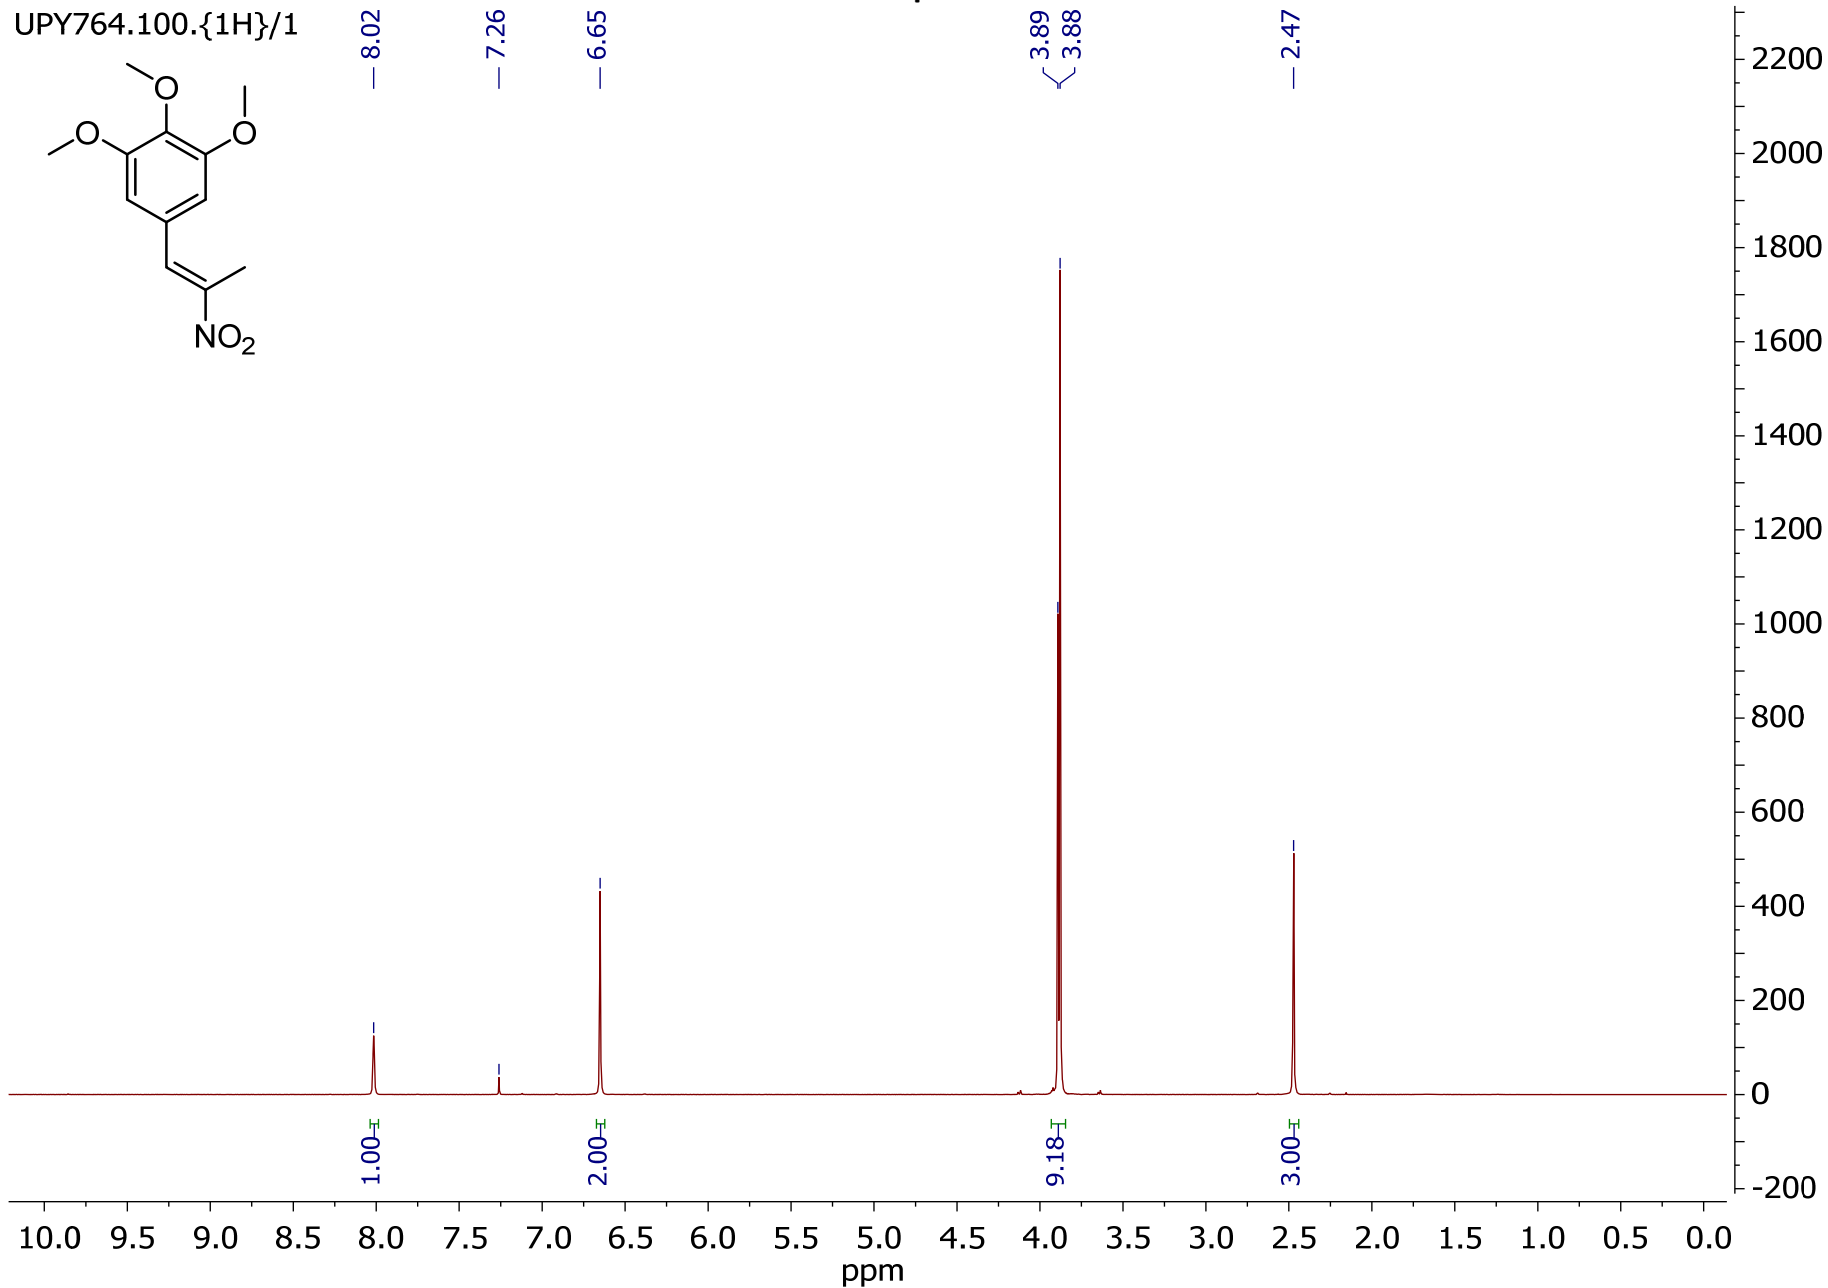

UPY763.100.{1H}/1

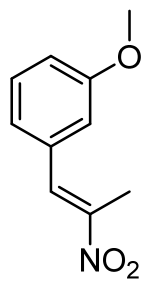

8.04  
7.39  
7.37  
7.34  
7.26  
7.02  
7.00  
6.97  
6.94

### NMR spectra of 1c

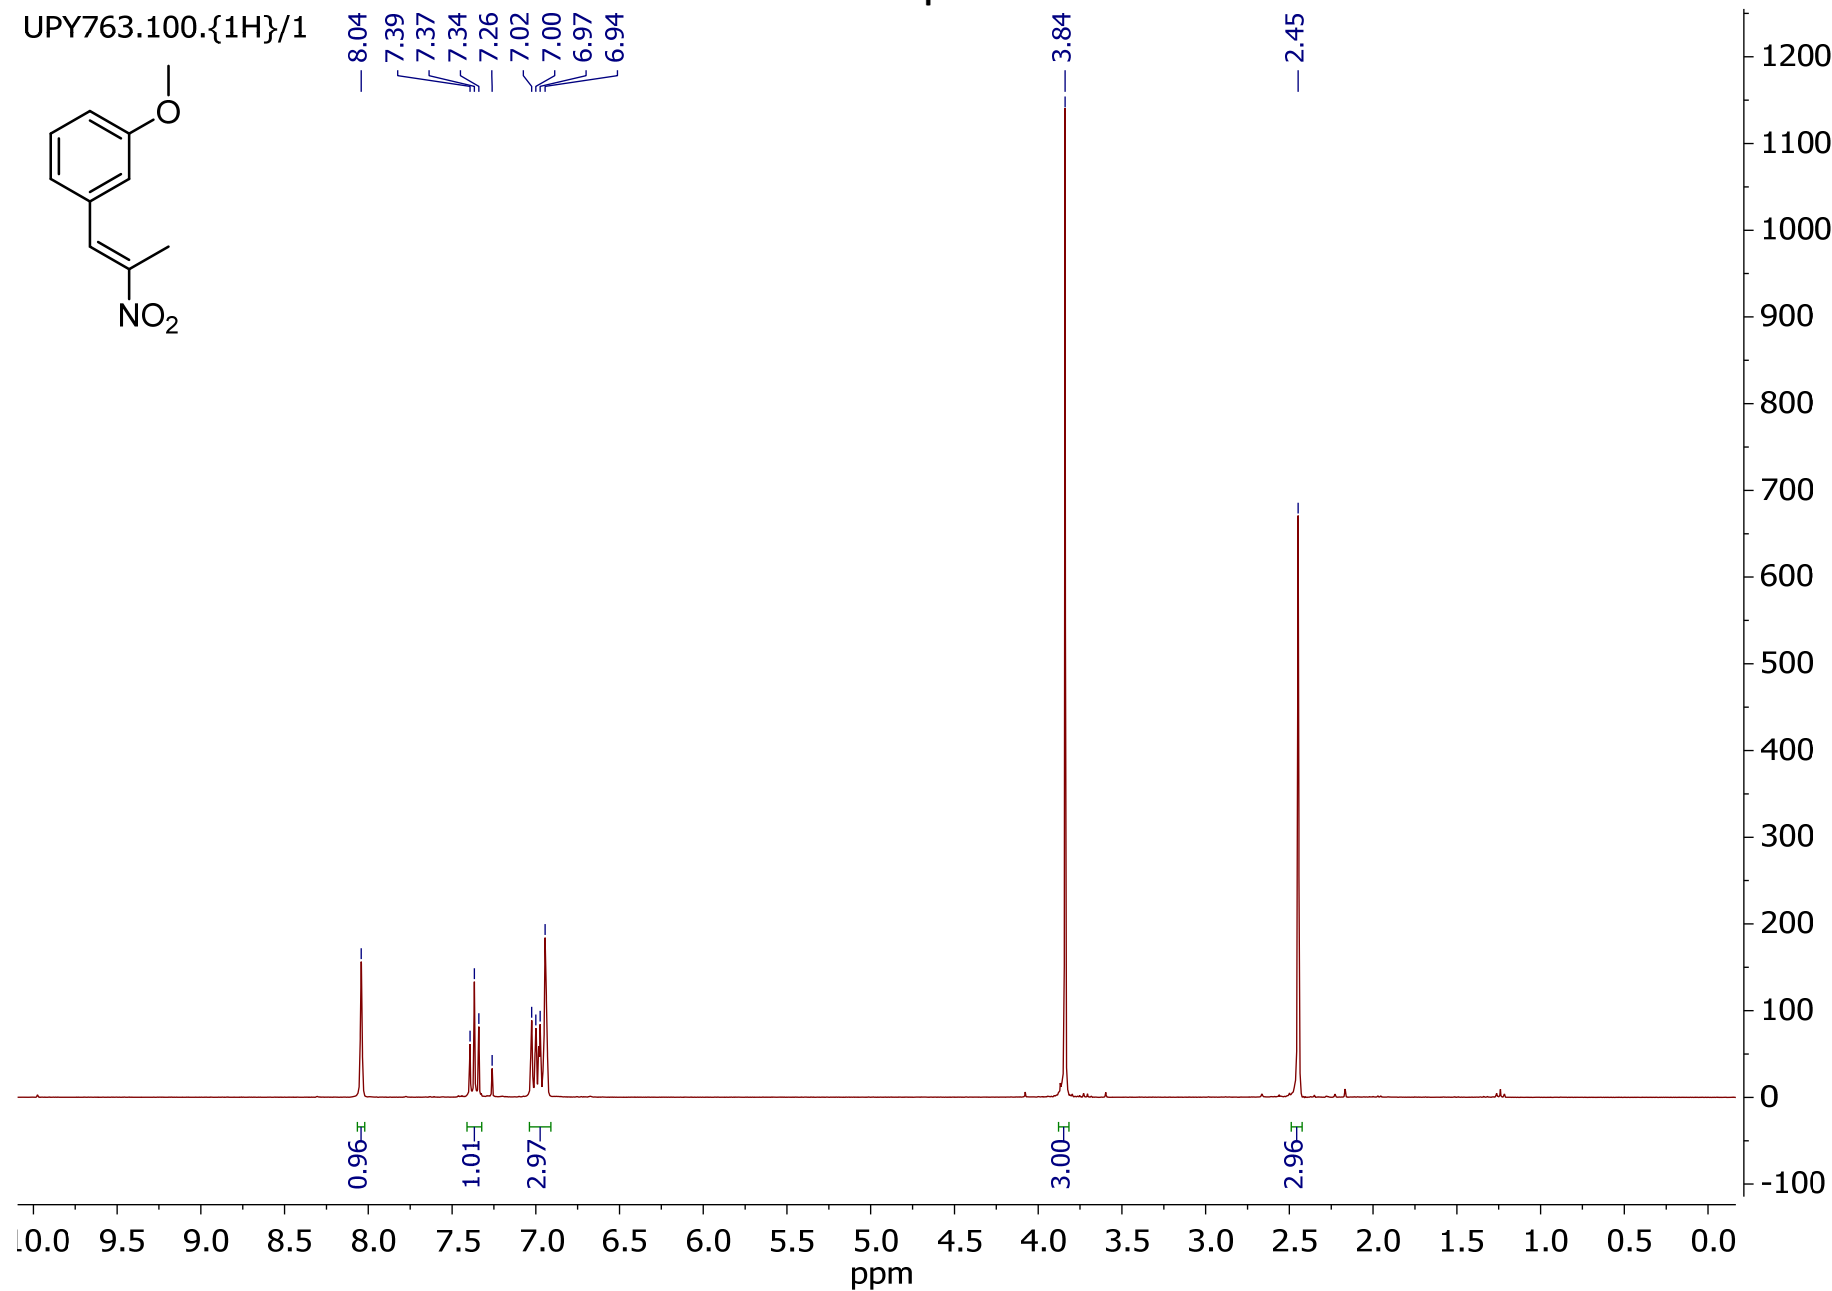

# NMR spectra of 1d

UPY780.200.{1H}/1

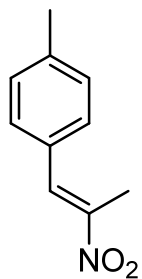

8.04

7.33

7.30

7.25

7.22

2.43

2.37

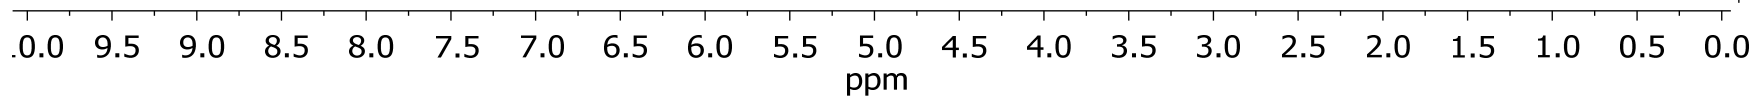



# NMR spectra of 1e

UPY781.200.{1H}/1

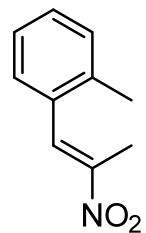

8.13

7.30  
7.24  
7.19

2.31  
2.29

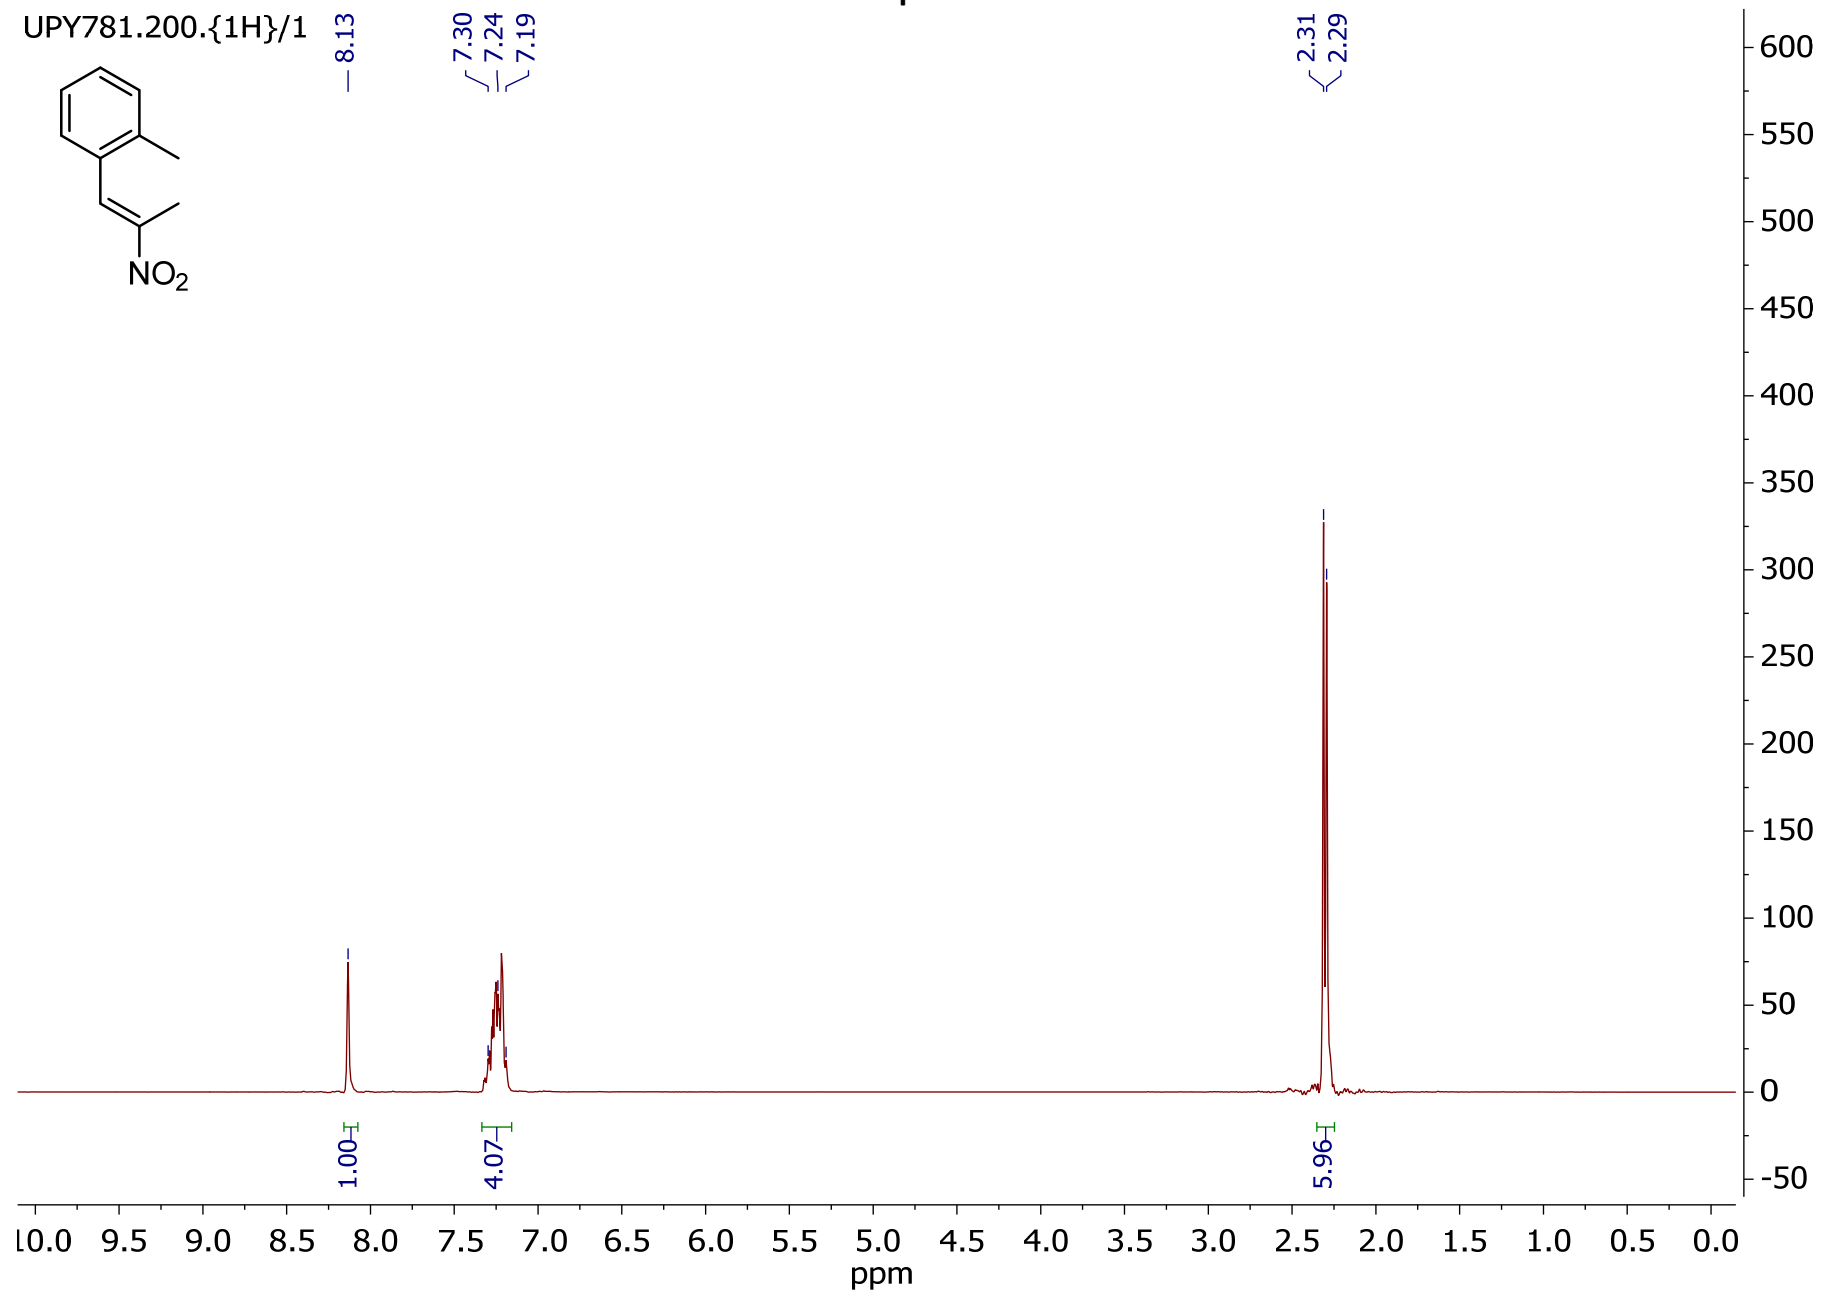

UPY953.200.{1H}/1

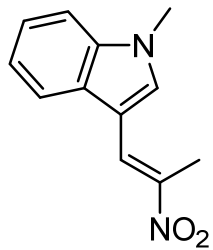

### NMR spectra of 1j

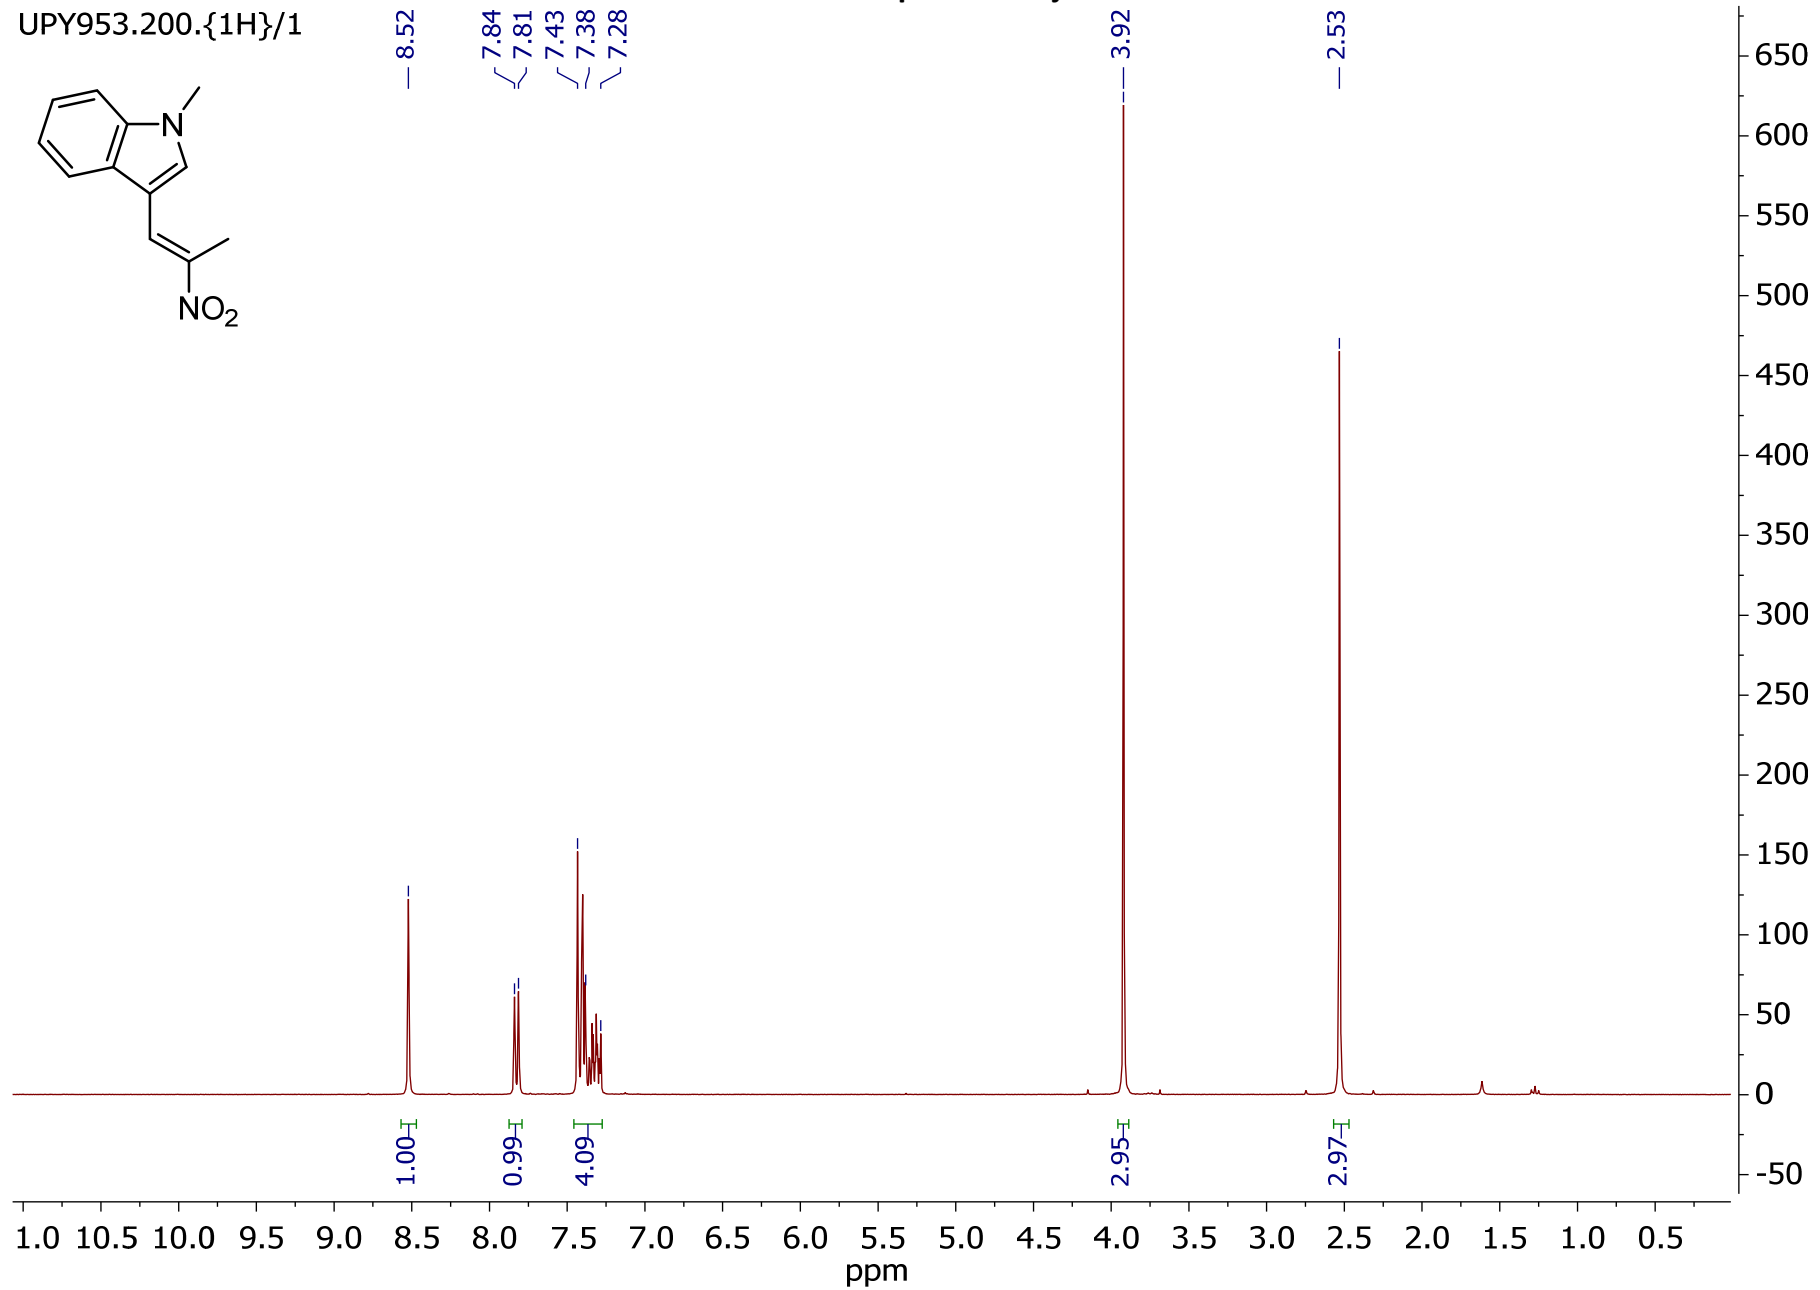

UPY768.100.{1H}/1

### NMR spectra of 6a

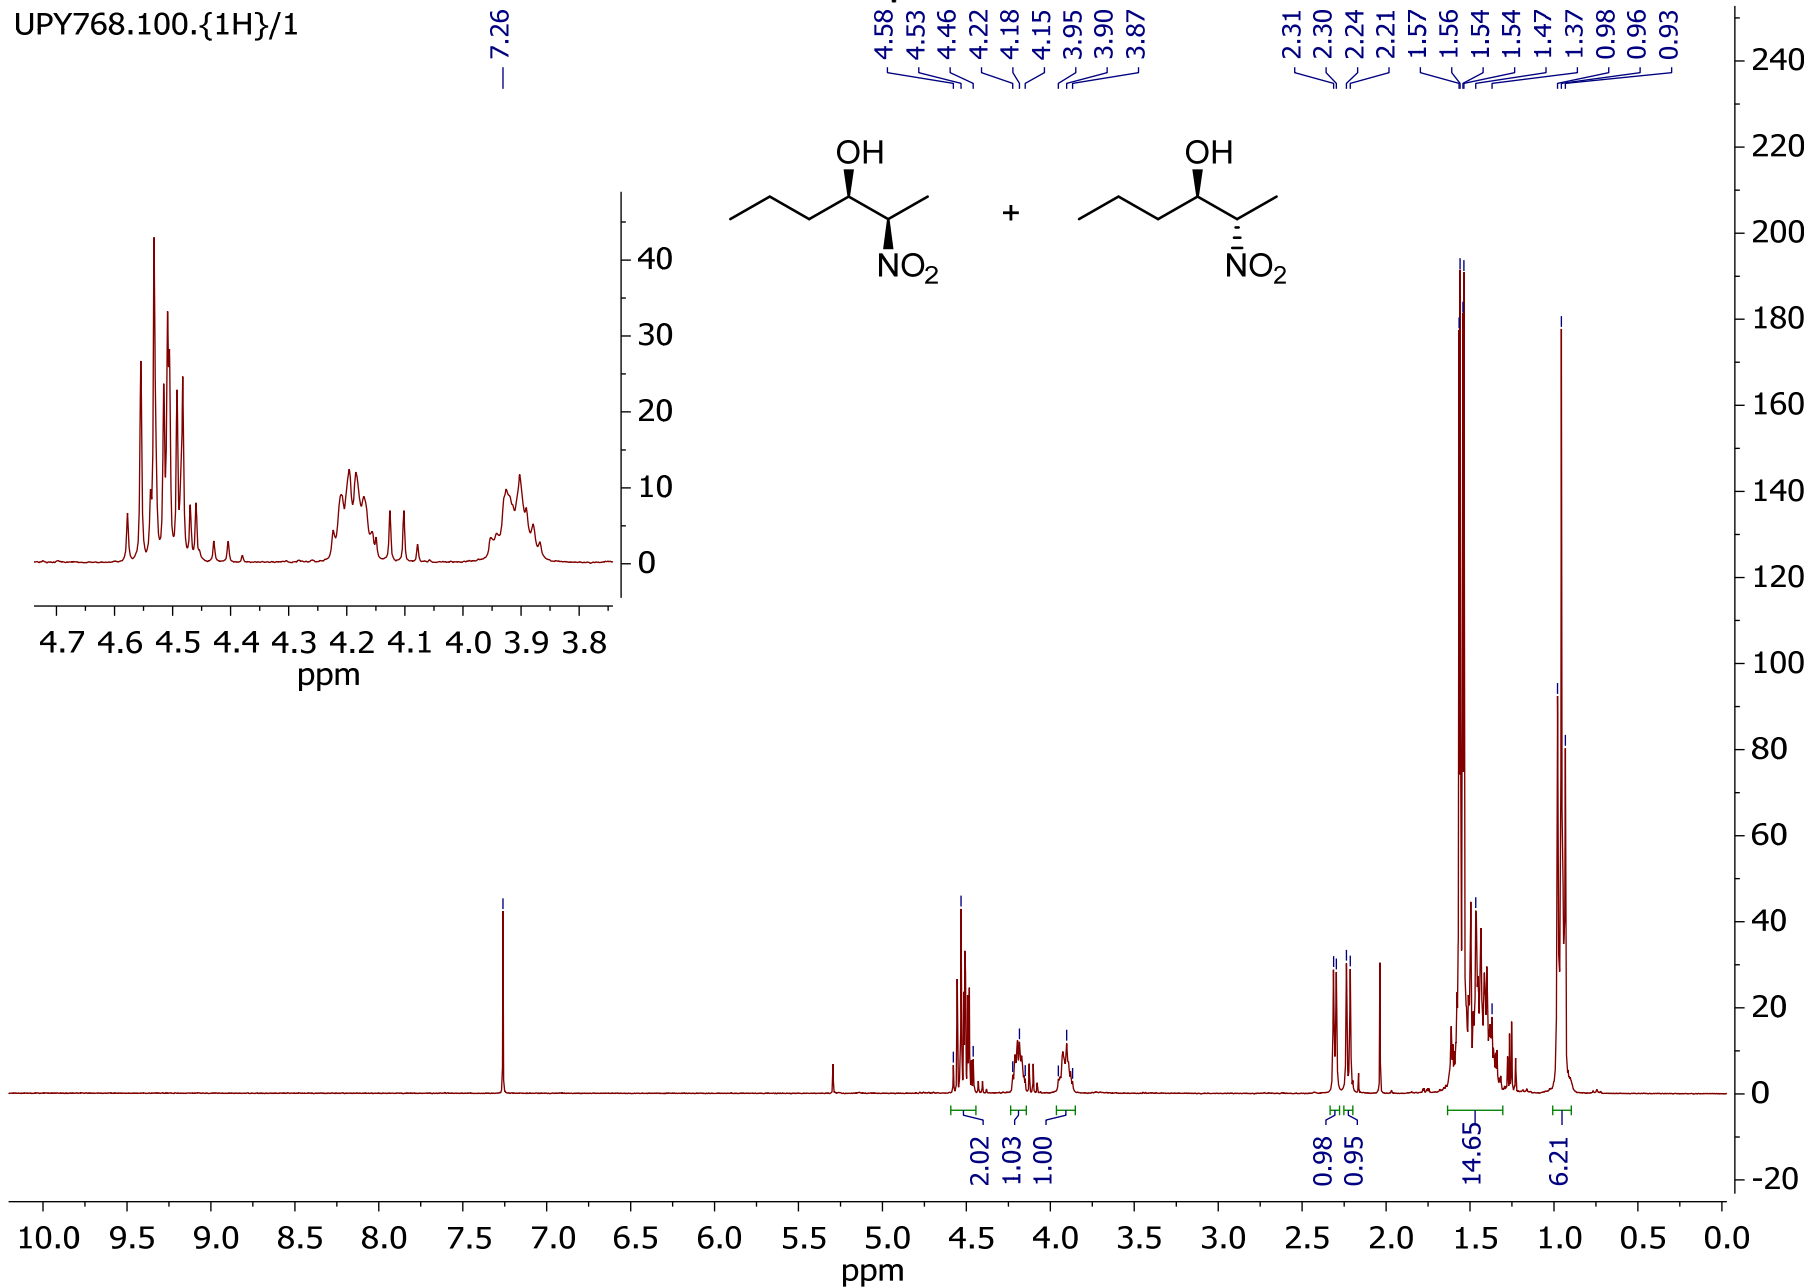

UPY624.100.{1H}/1

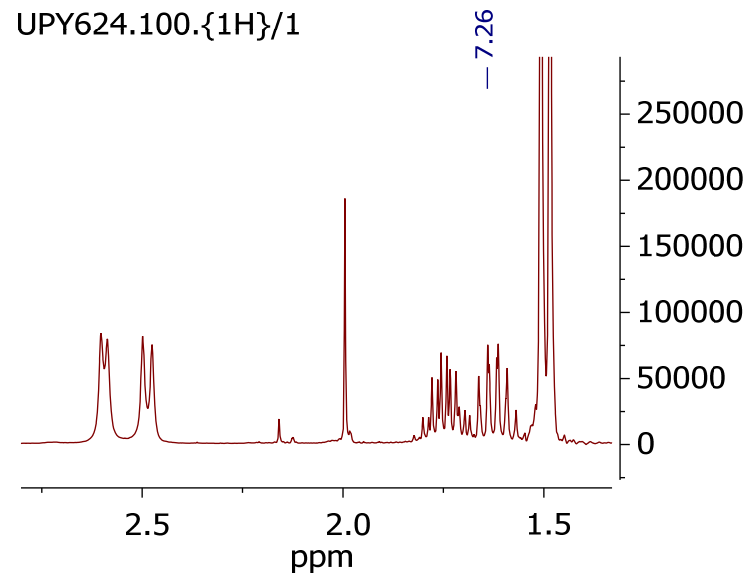

### NMR spectra of 6b

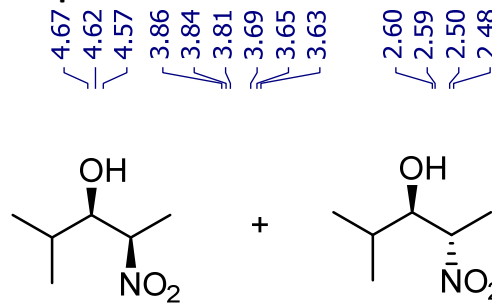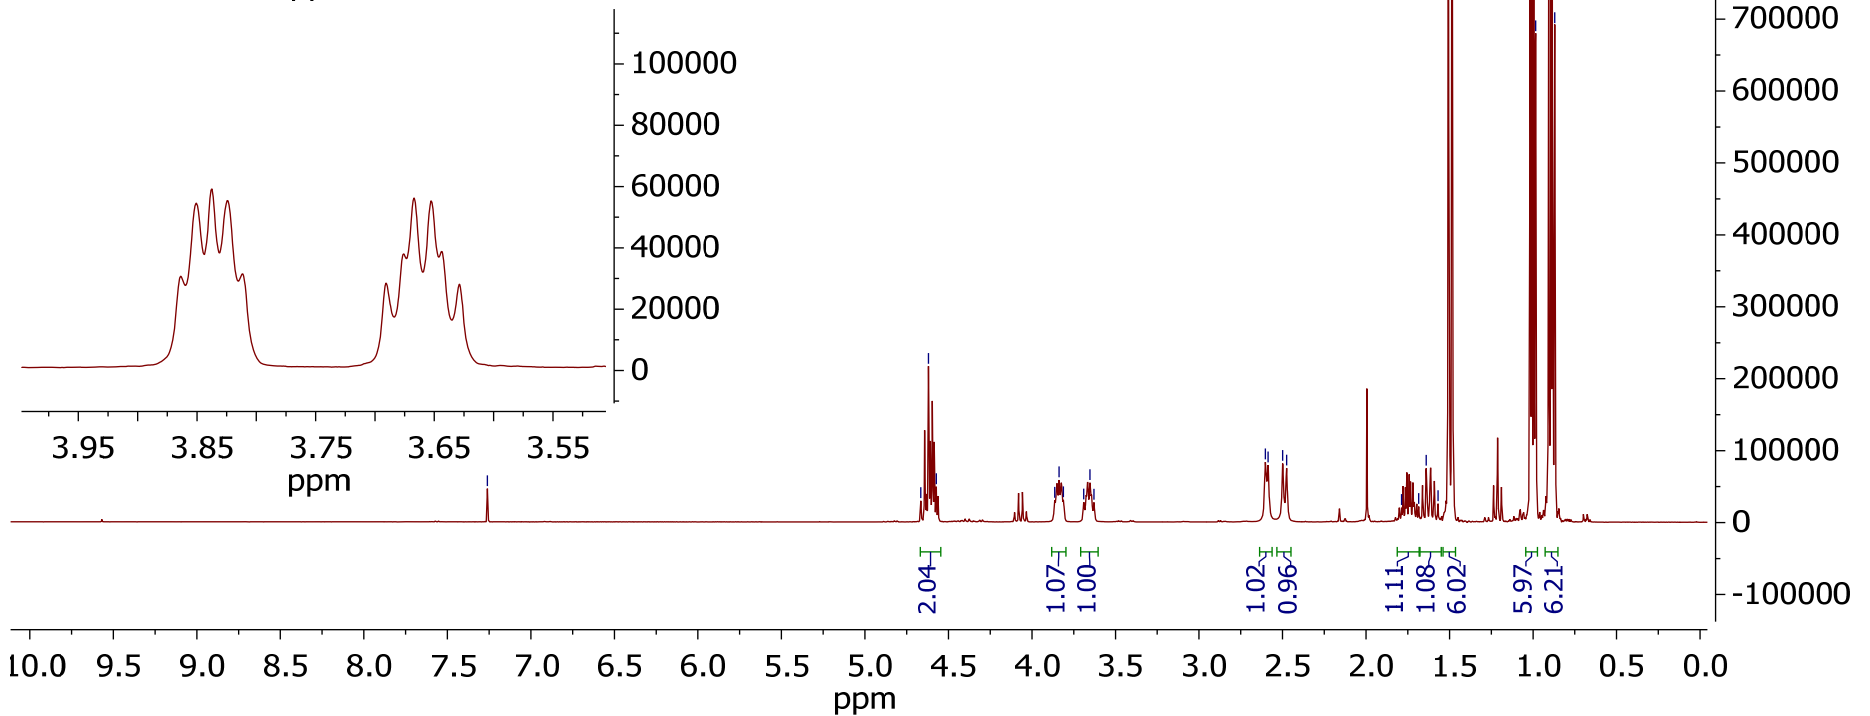

UPY766.100.{1H}/1

7.26

### NMR spectra of 6c

- 4.70
- 4.65
- 4.60
- 3.48
- 3.46
- 3.43
- 3.37
- 3.34
- 3.32
- 3.31
- 3.30
- 2.31
- 2.29
- 2.29
- 2.27
- 1.64
- 1.62
- 1.60
- 0.97
- 0.91
- 0.86
- 0.69
- 0.62
- 0.55
- 0.46
- 0.40
- 0.31

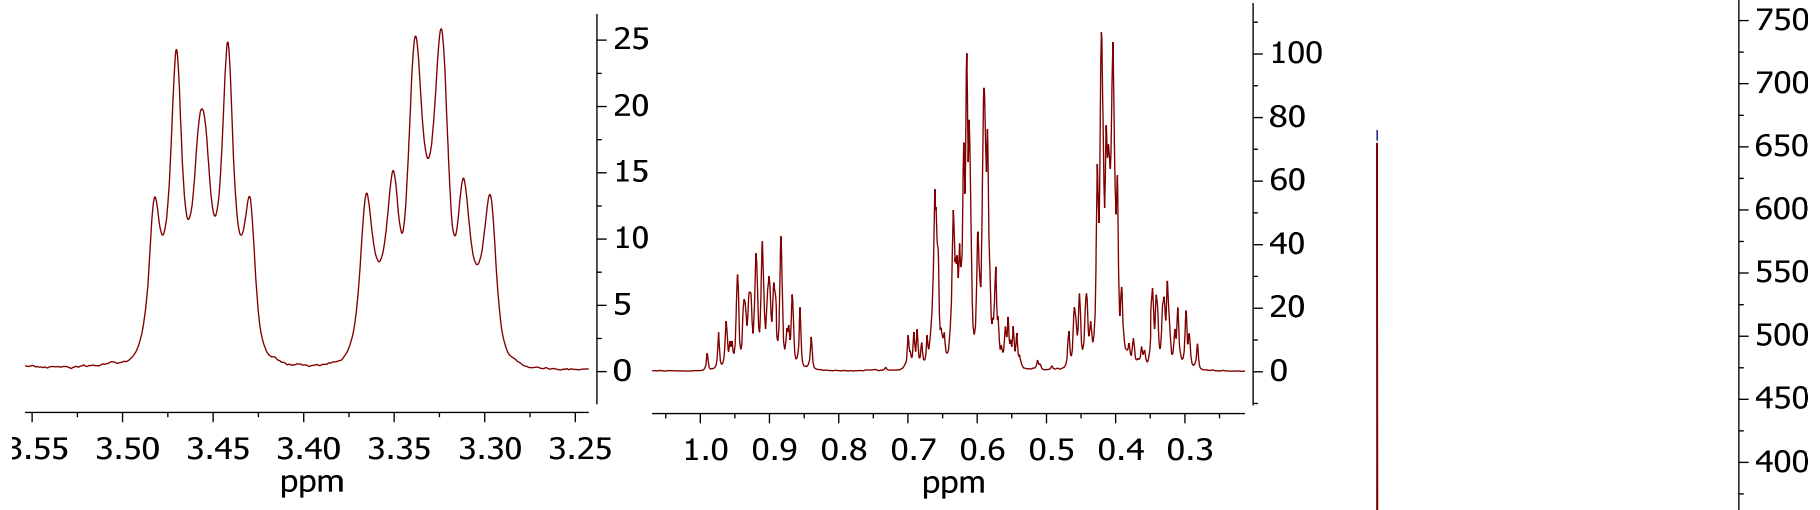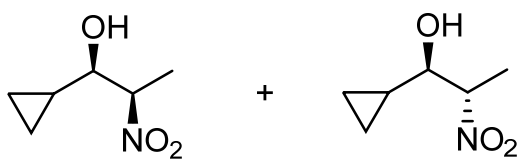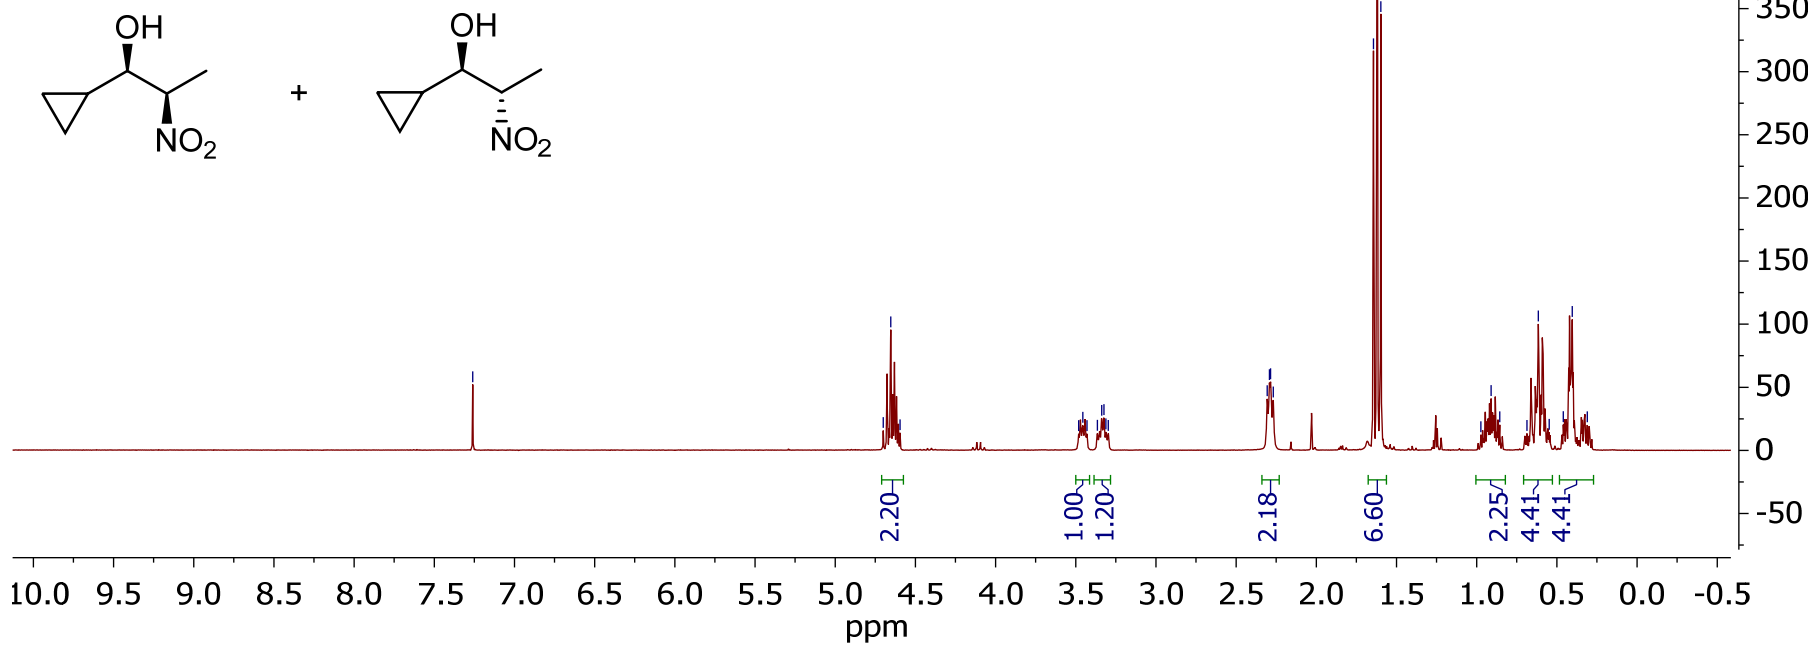

UPY627.100.{1H}/1

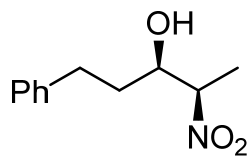

+

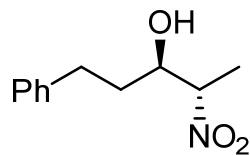

### NMR spectra of 6d

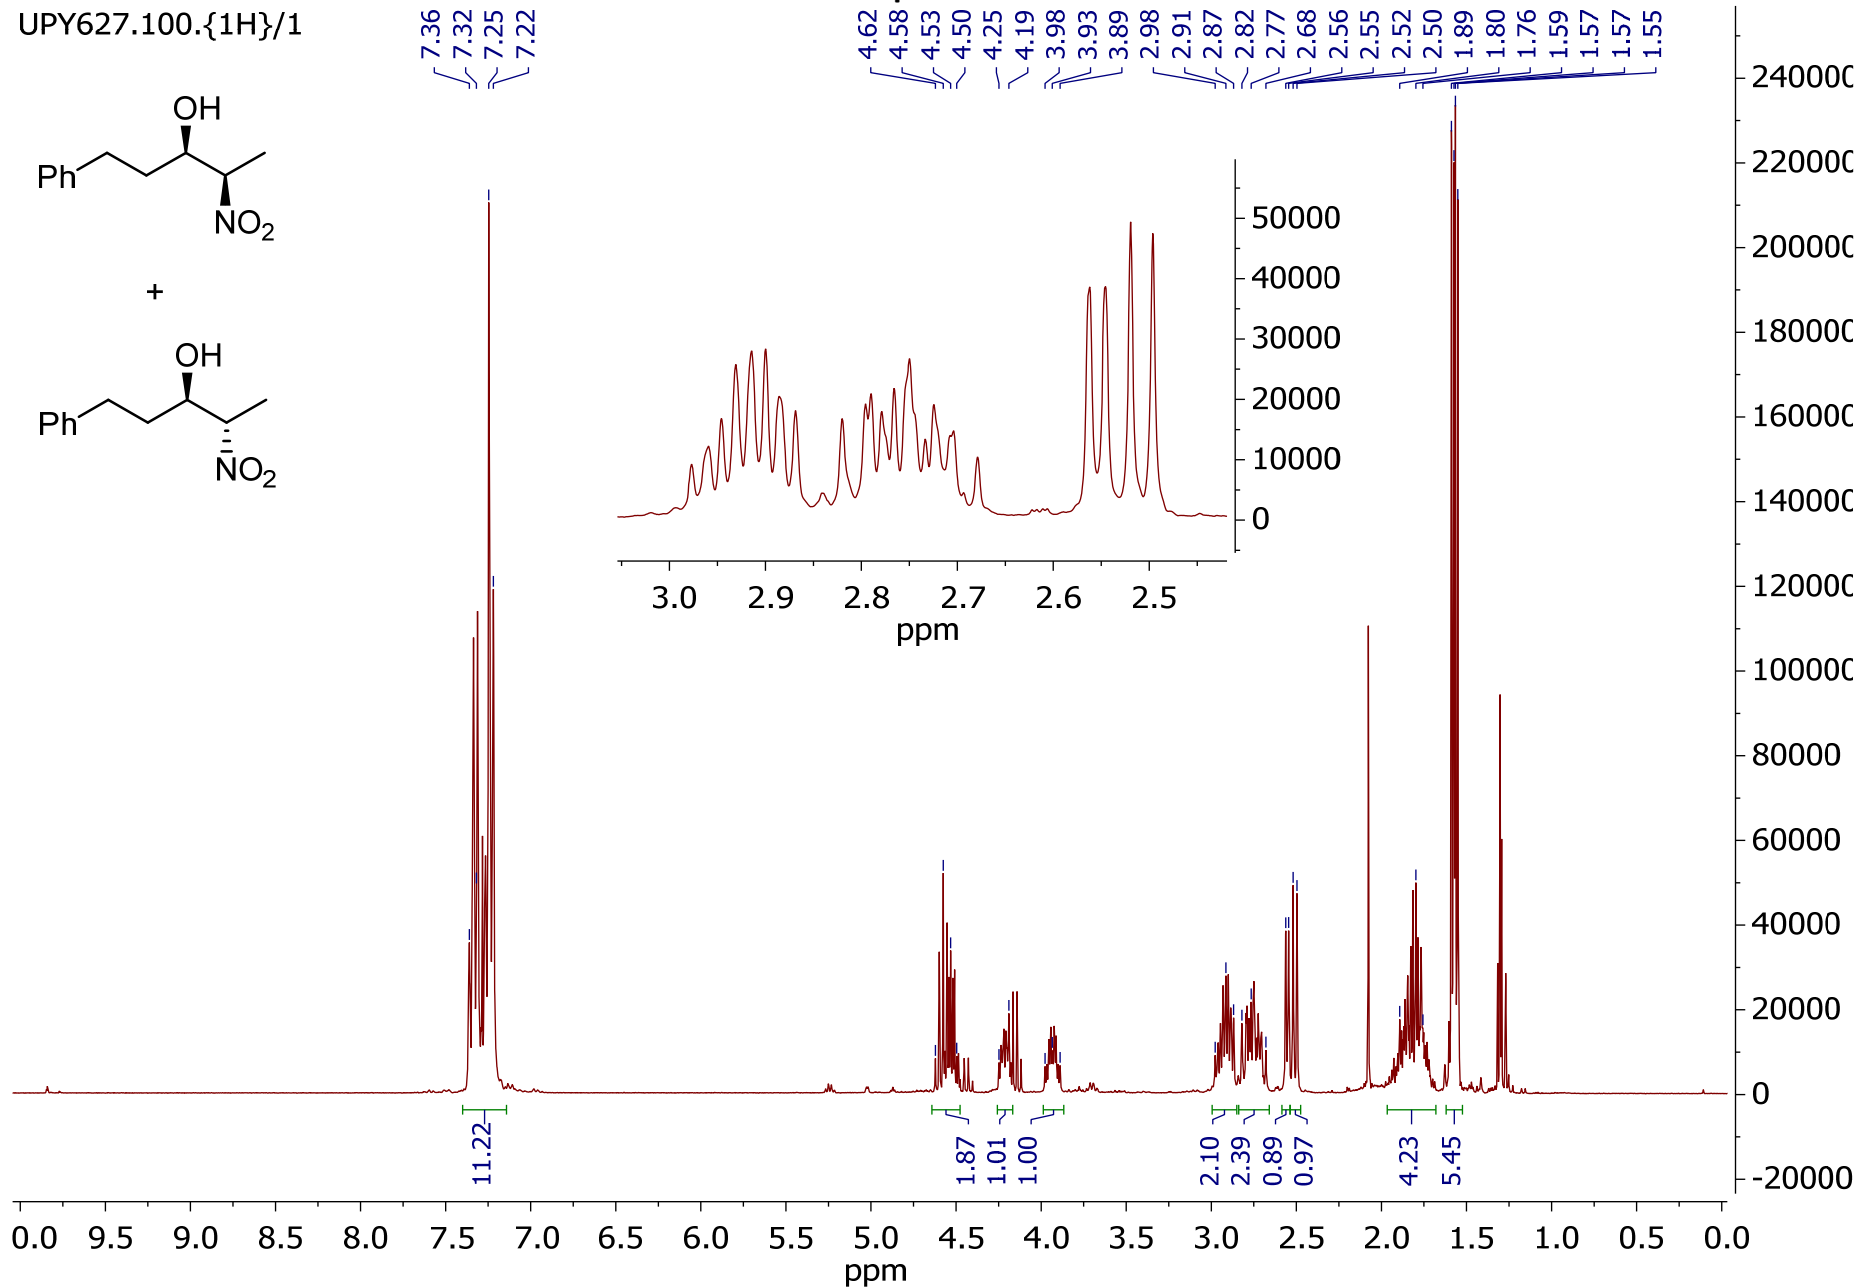

UPY837.100.{1H}/1

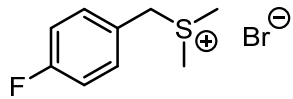

7.61  
7.60  
7.59  
7.57  
7.33  
7.31  
7.28

### NMR spectra of 11b

4.90

2.90

2.50

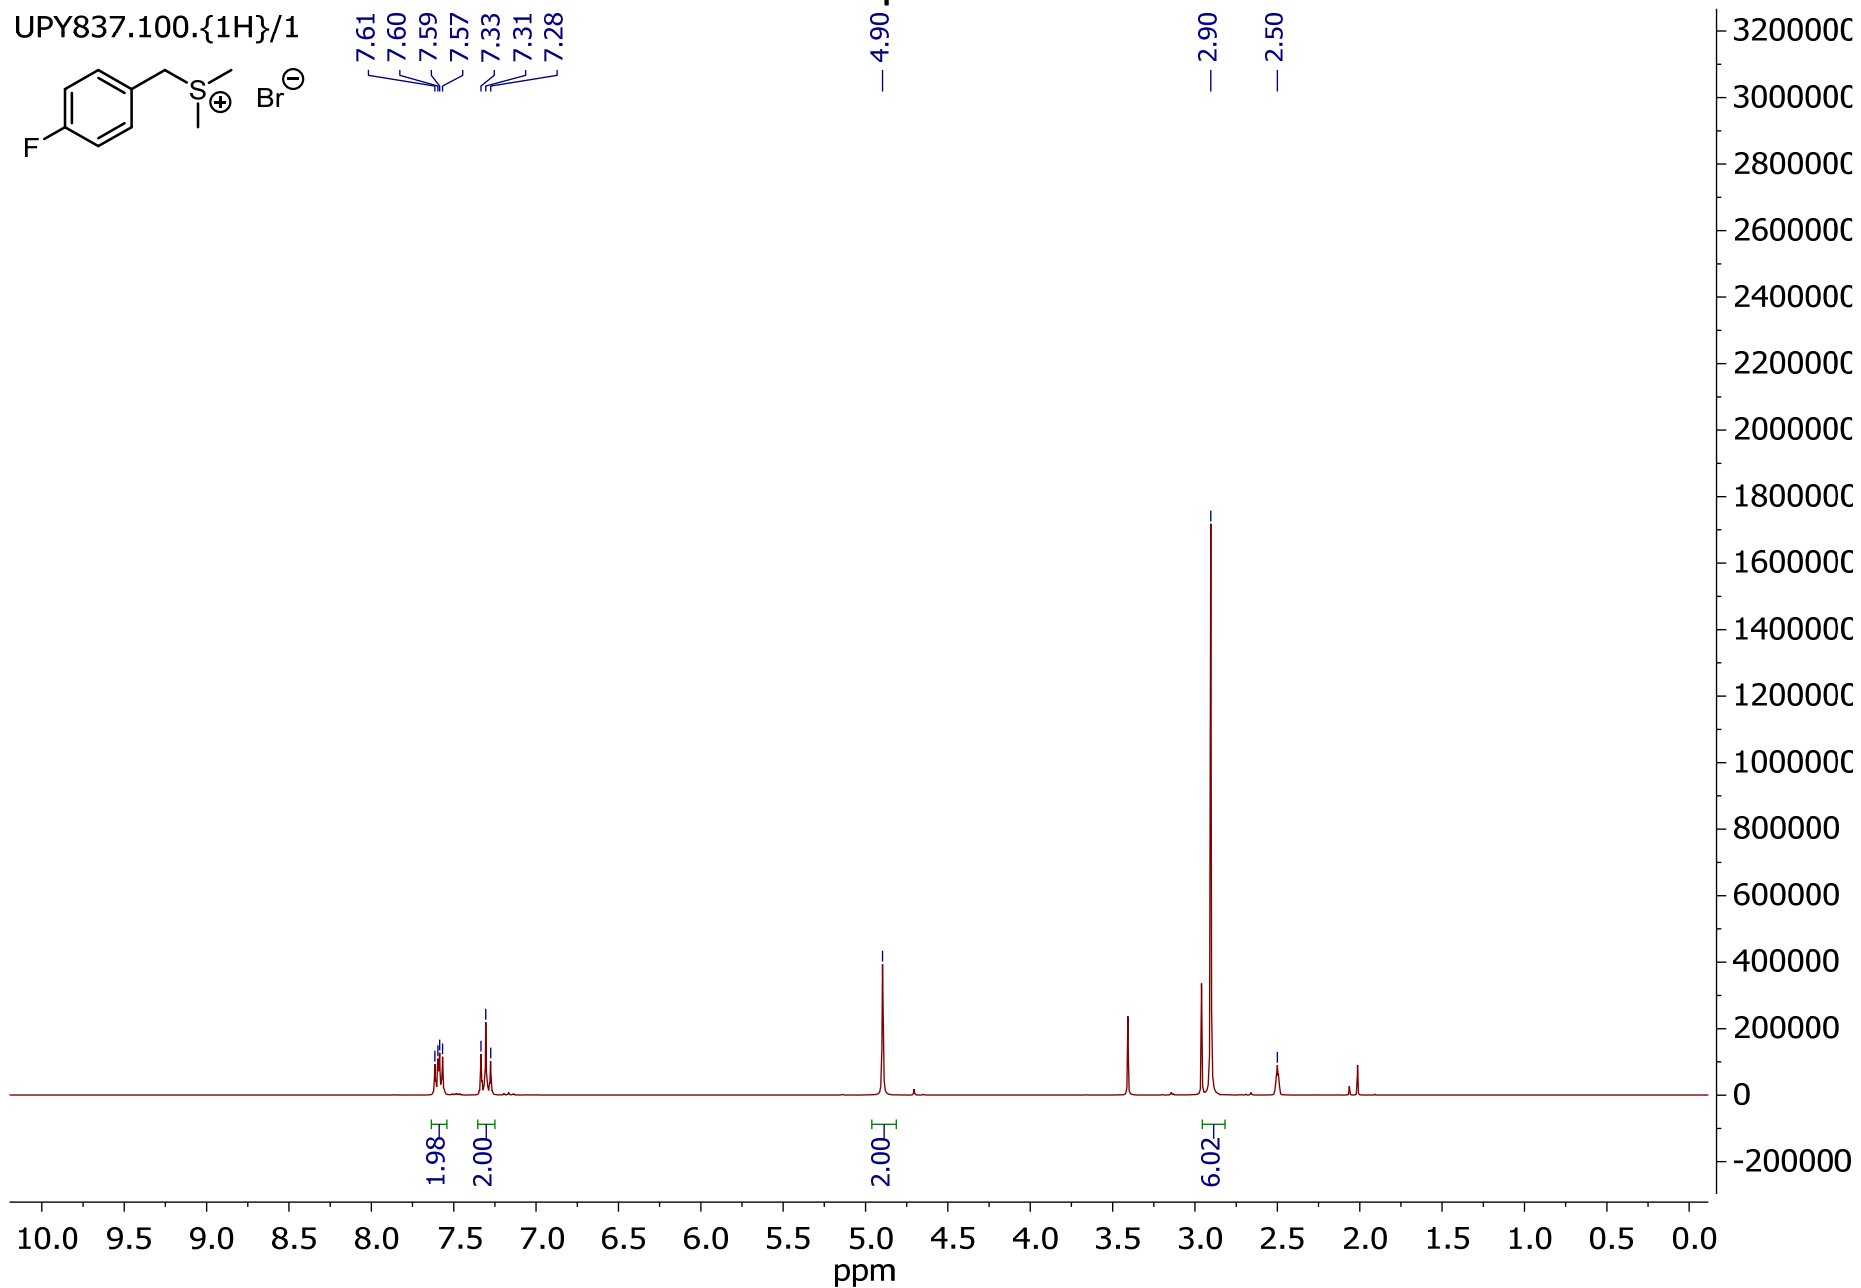

UPY837.100.{13C}/2

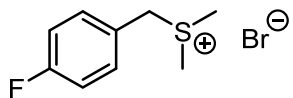

— 164.33  
— 161.06

133.05  
132.94  
124.79  
124.74  
116.41  
116.12

— 44.34  
— 39.52

— 23.61

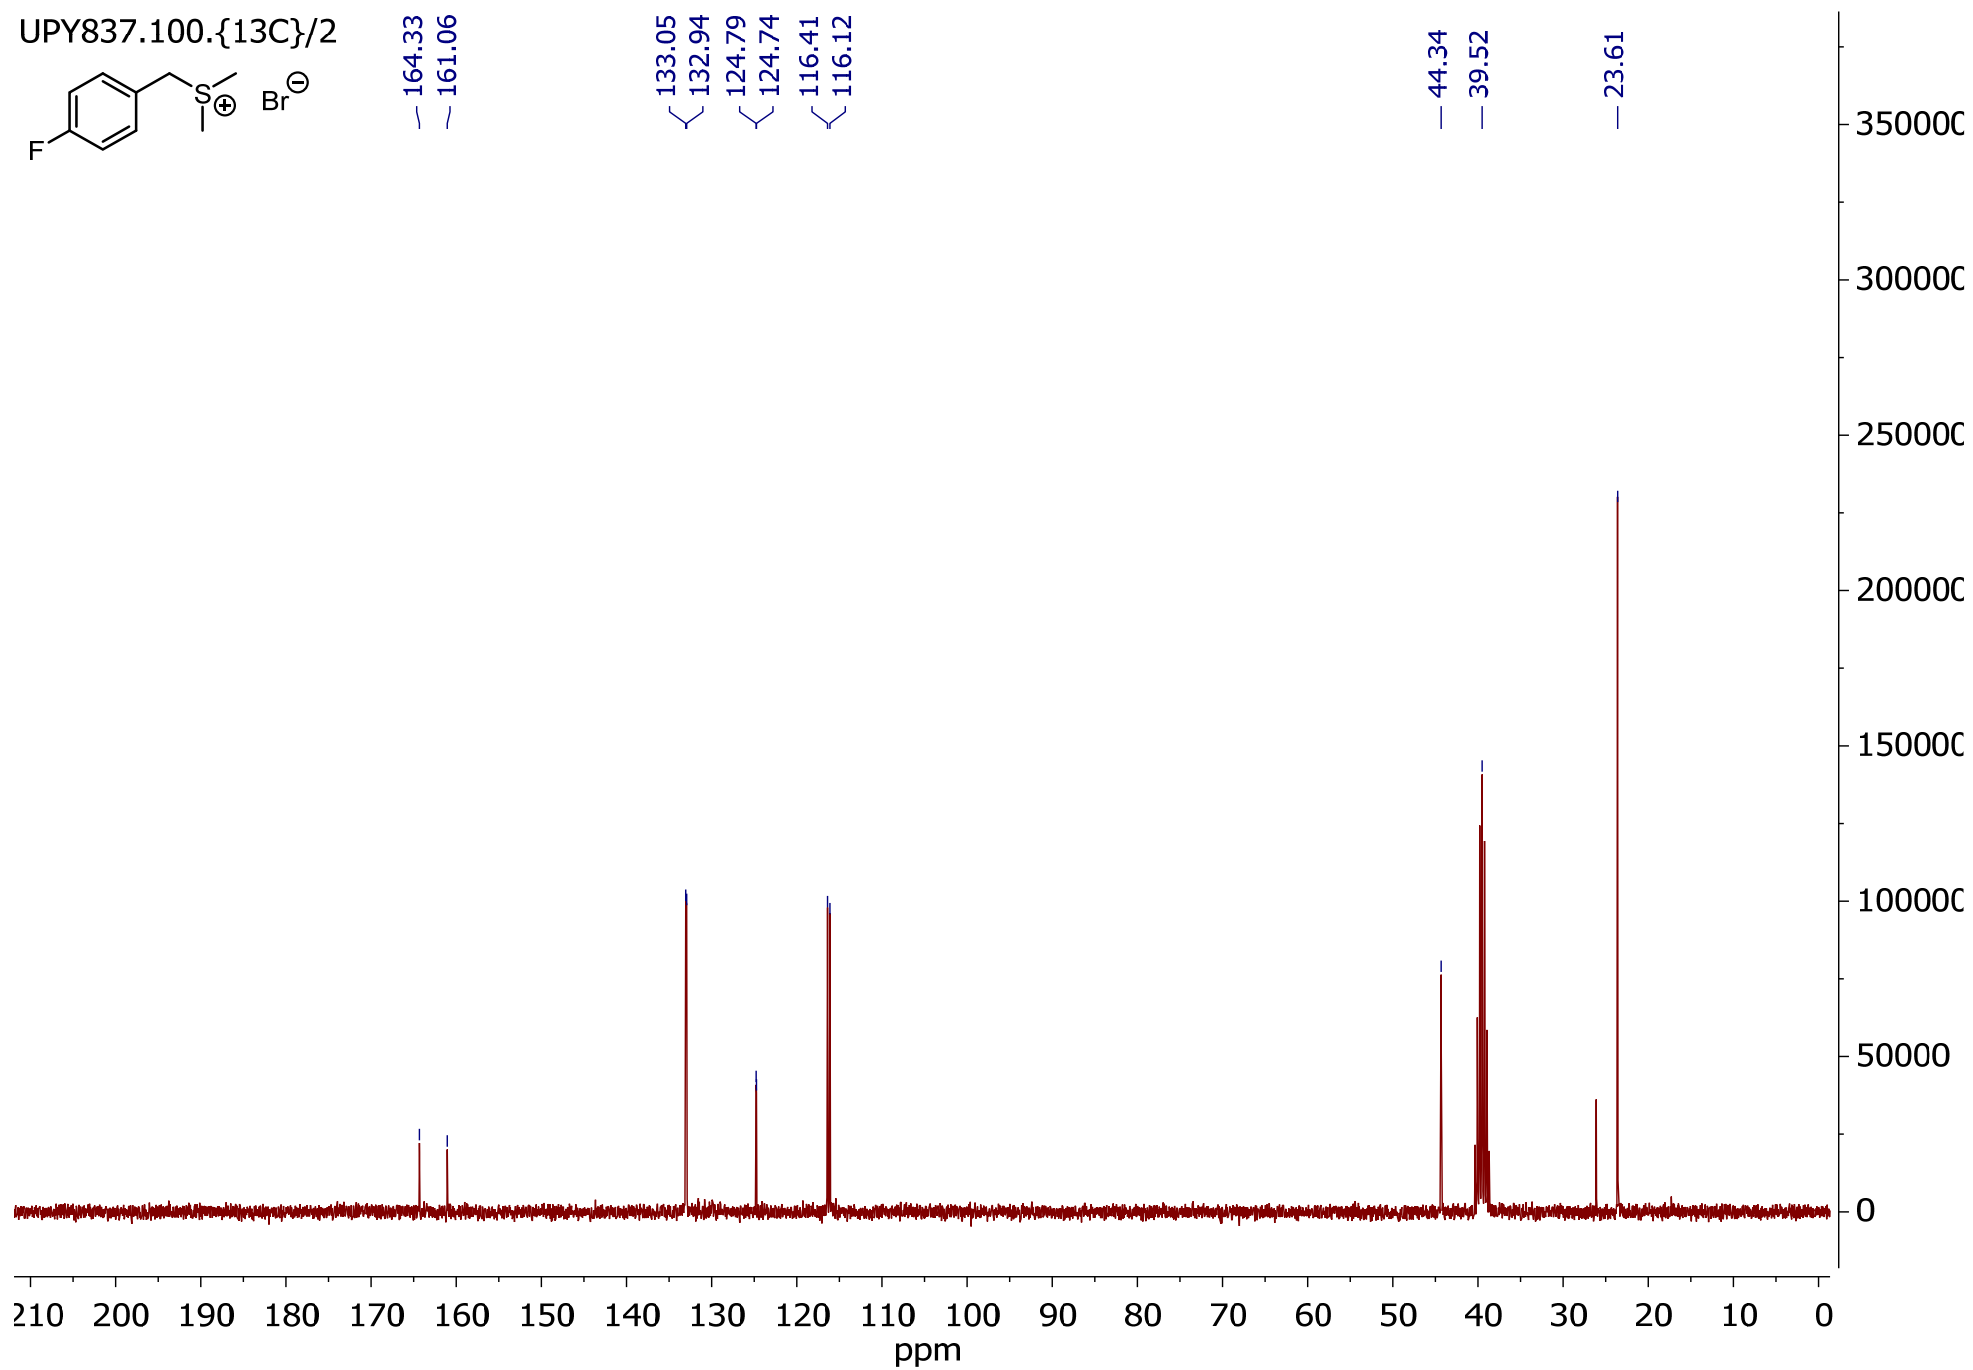

S16



UPY837.100.{13C}deptsp135/3

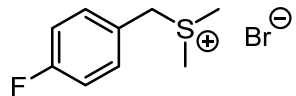

133.86  
132.84  
116.41  
116.12

44.34

23.61

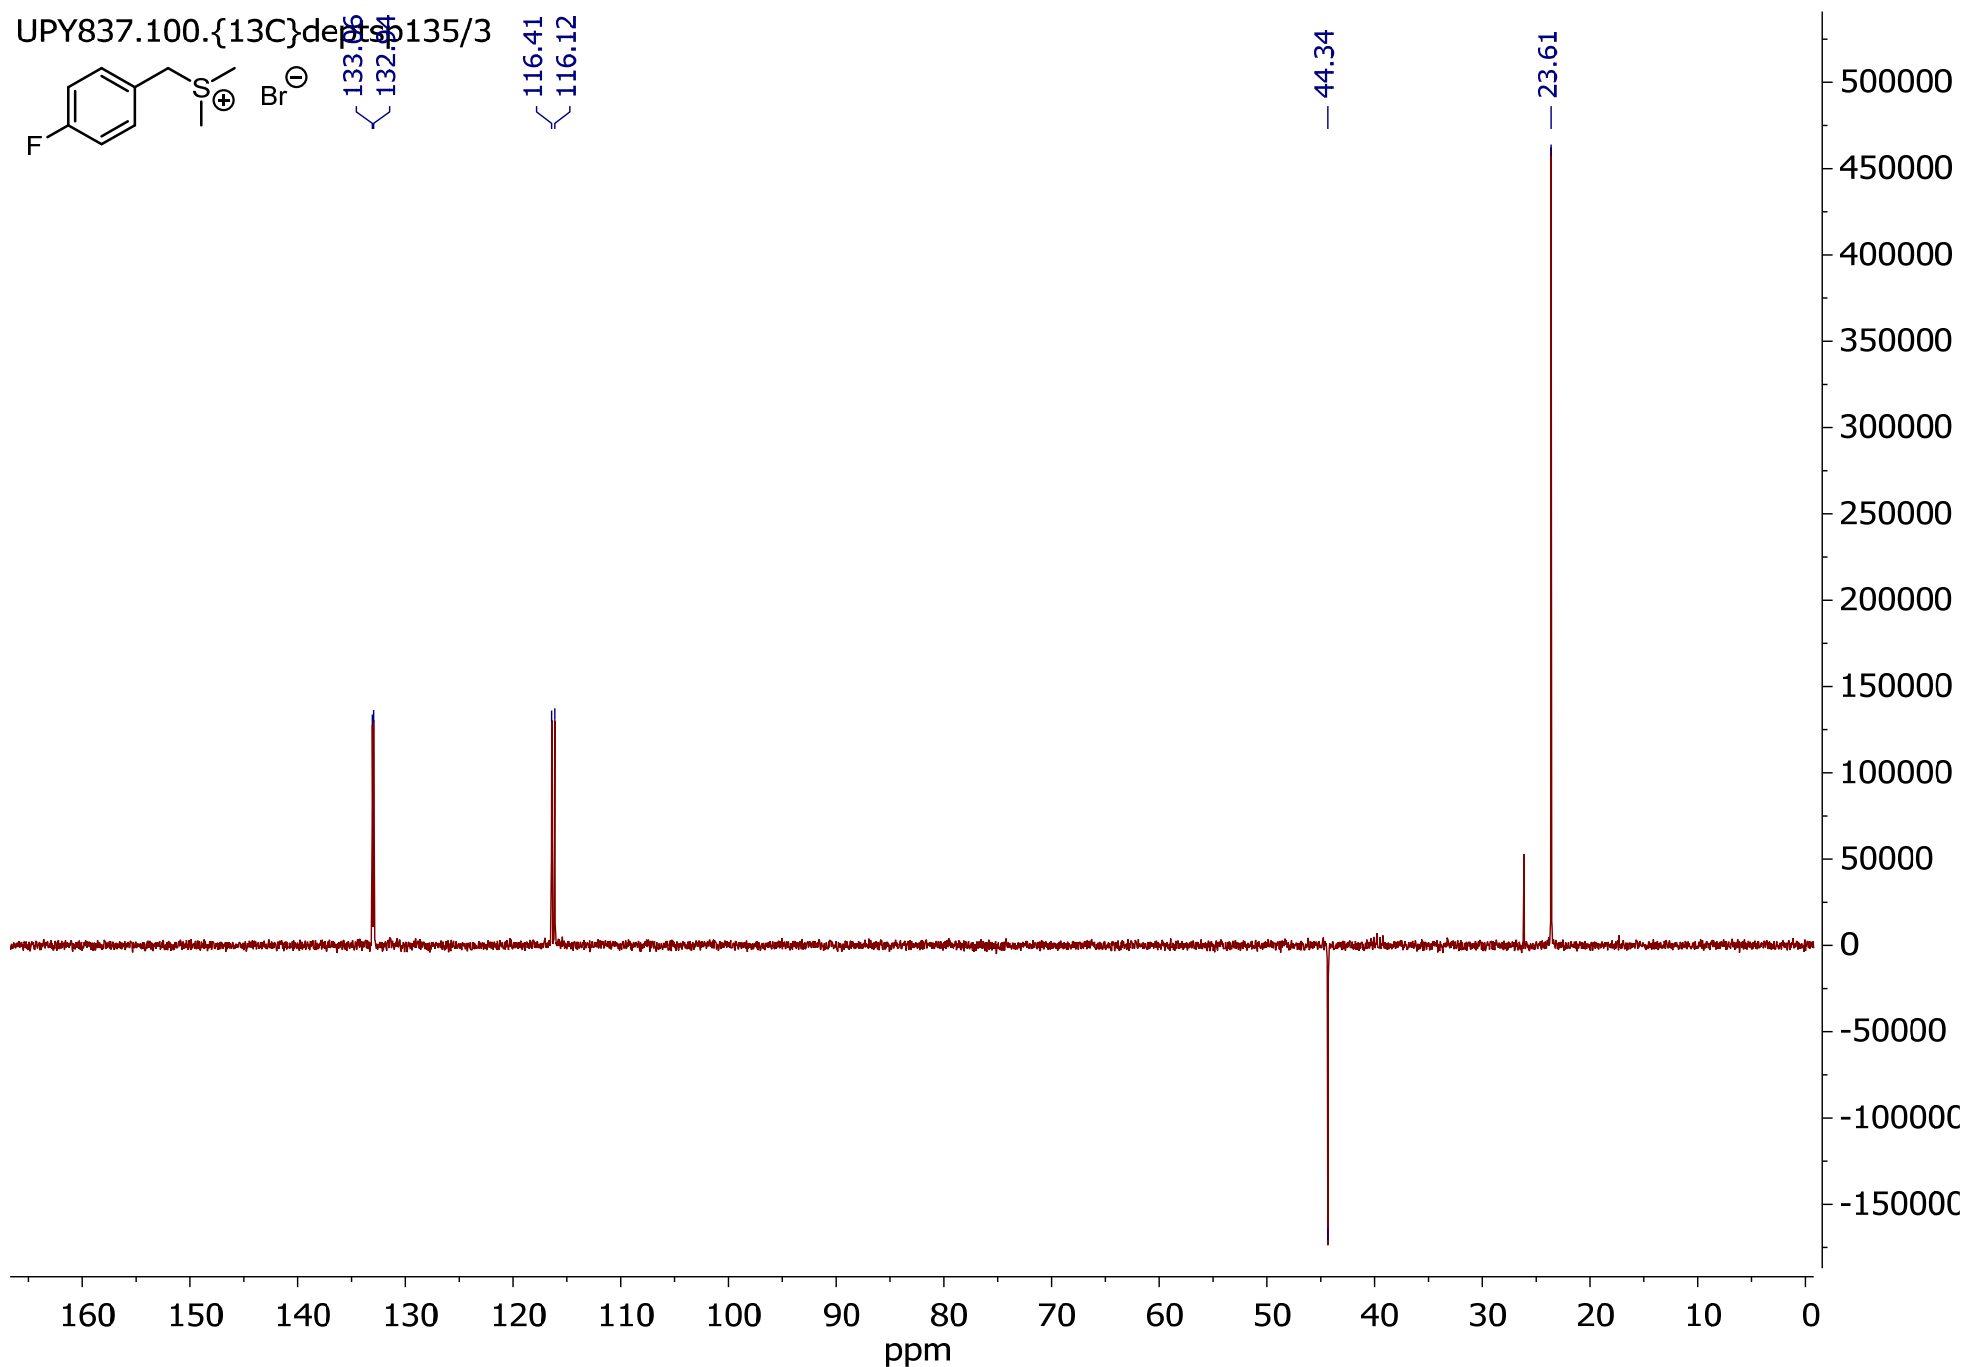

UPY837.100.{19F}INVGATED/4

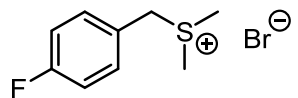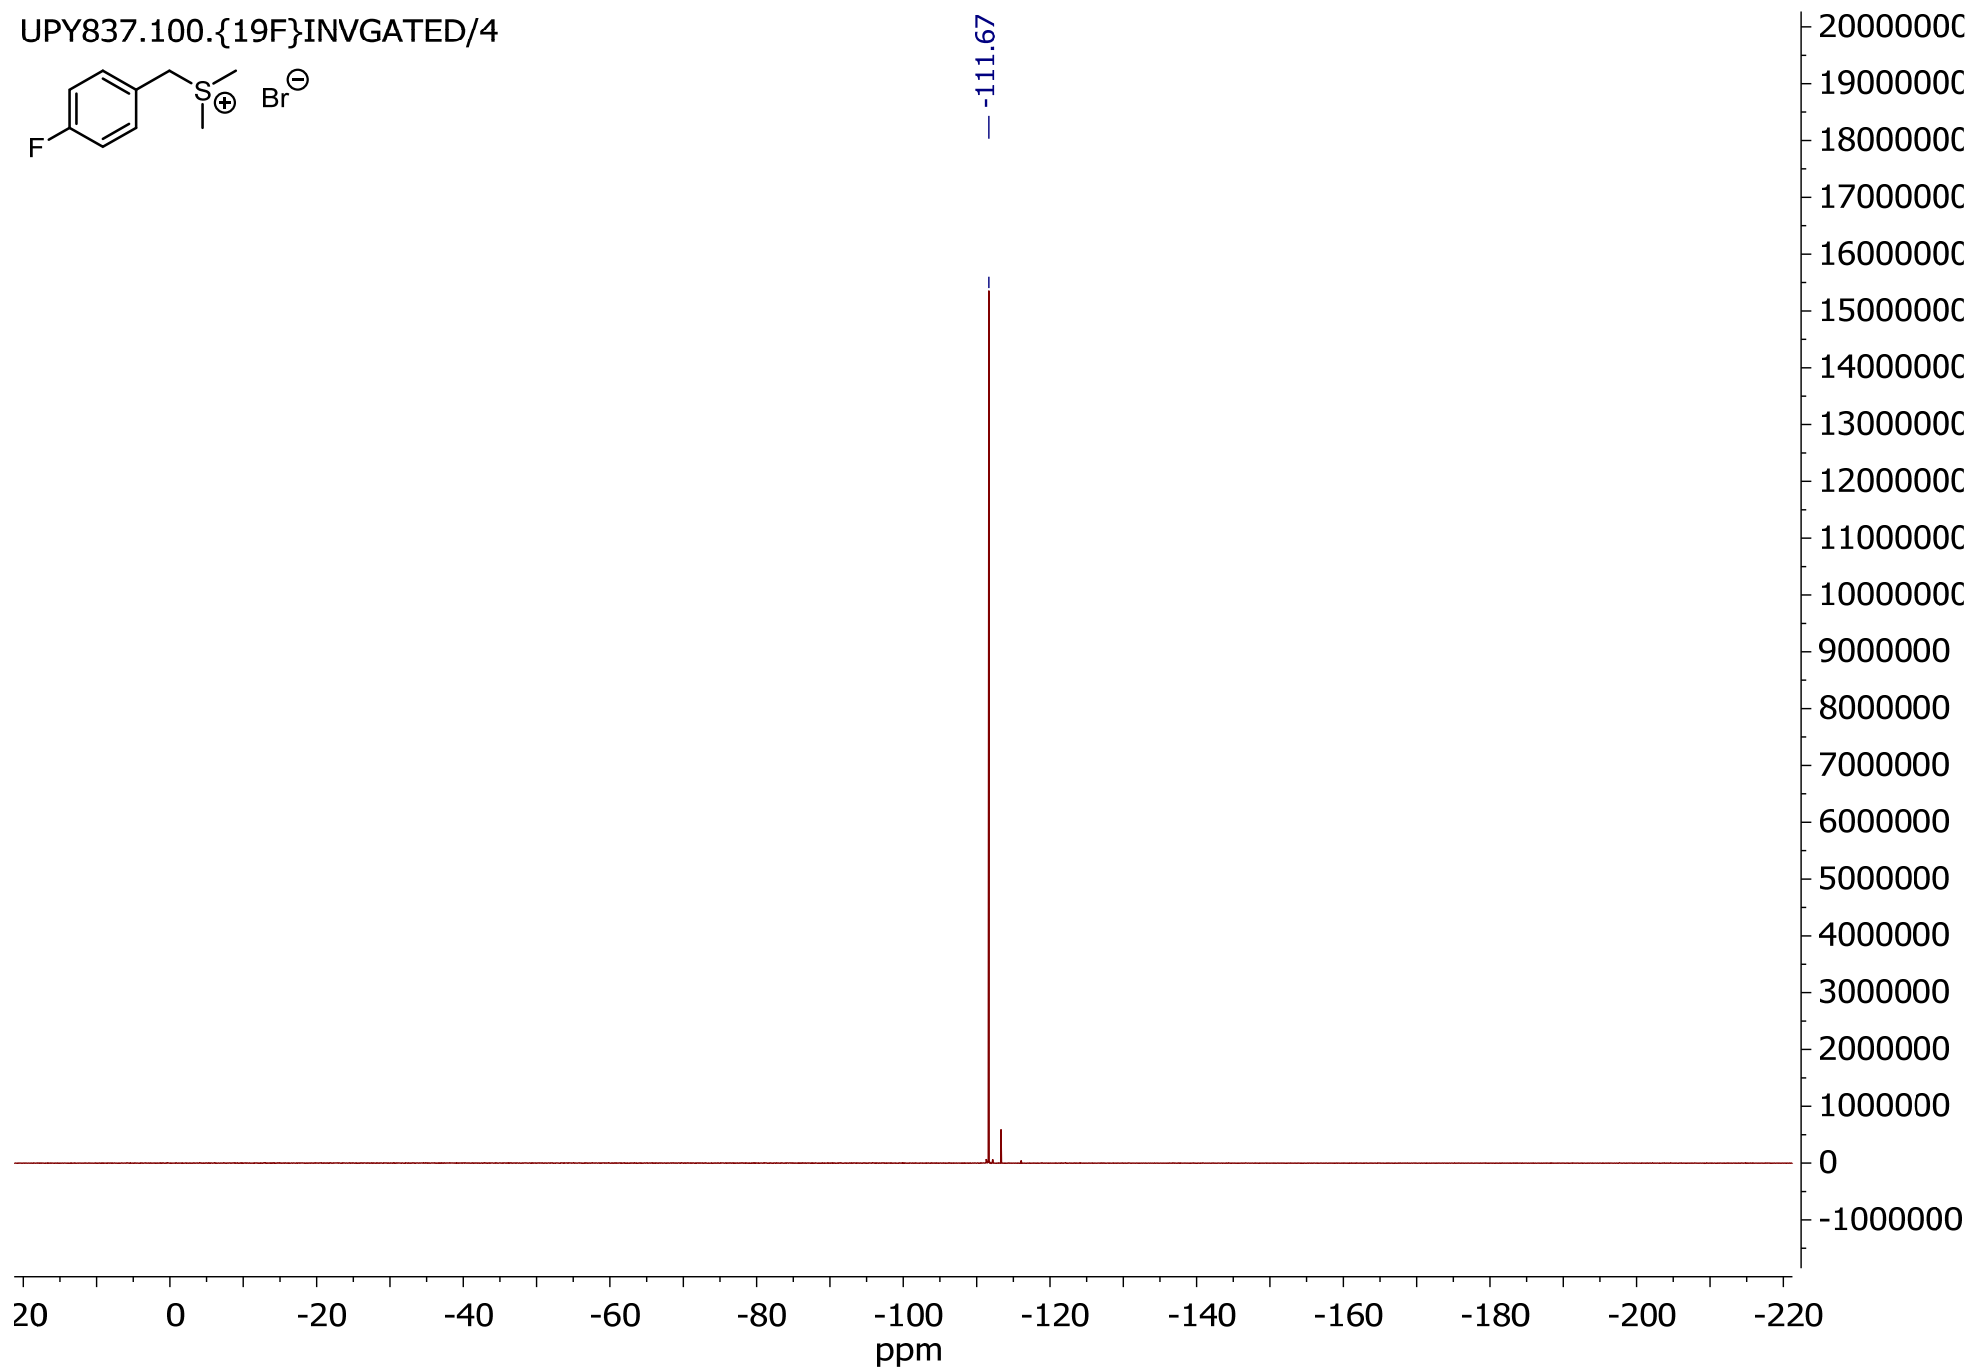

S18

KAA1.100.{1H}/1  
/ILD T KAA1.100

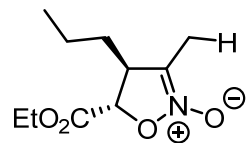

— 7.26

### NMR spectra of 8a

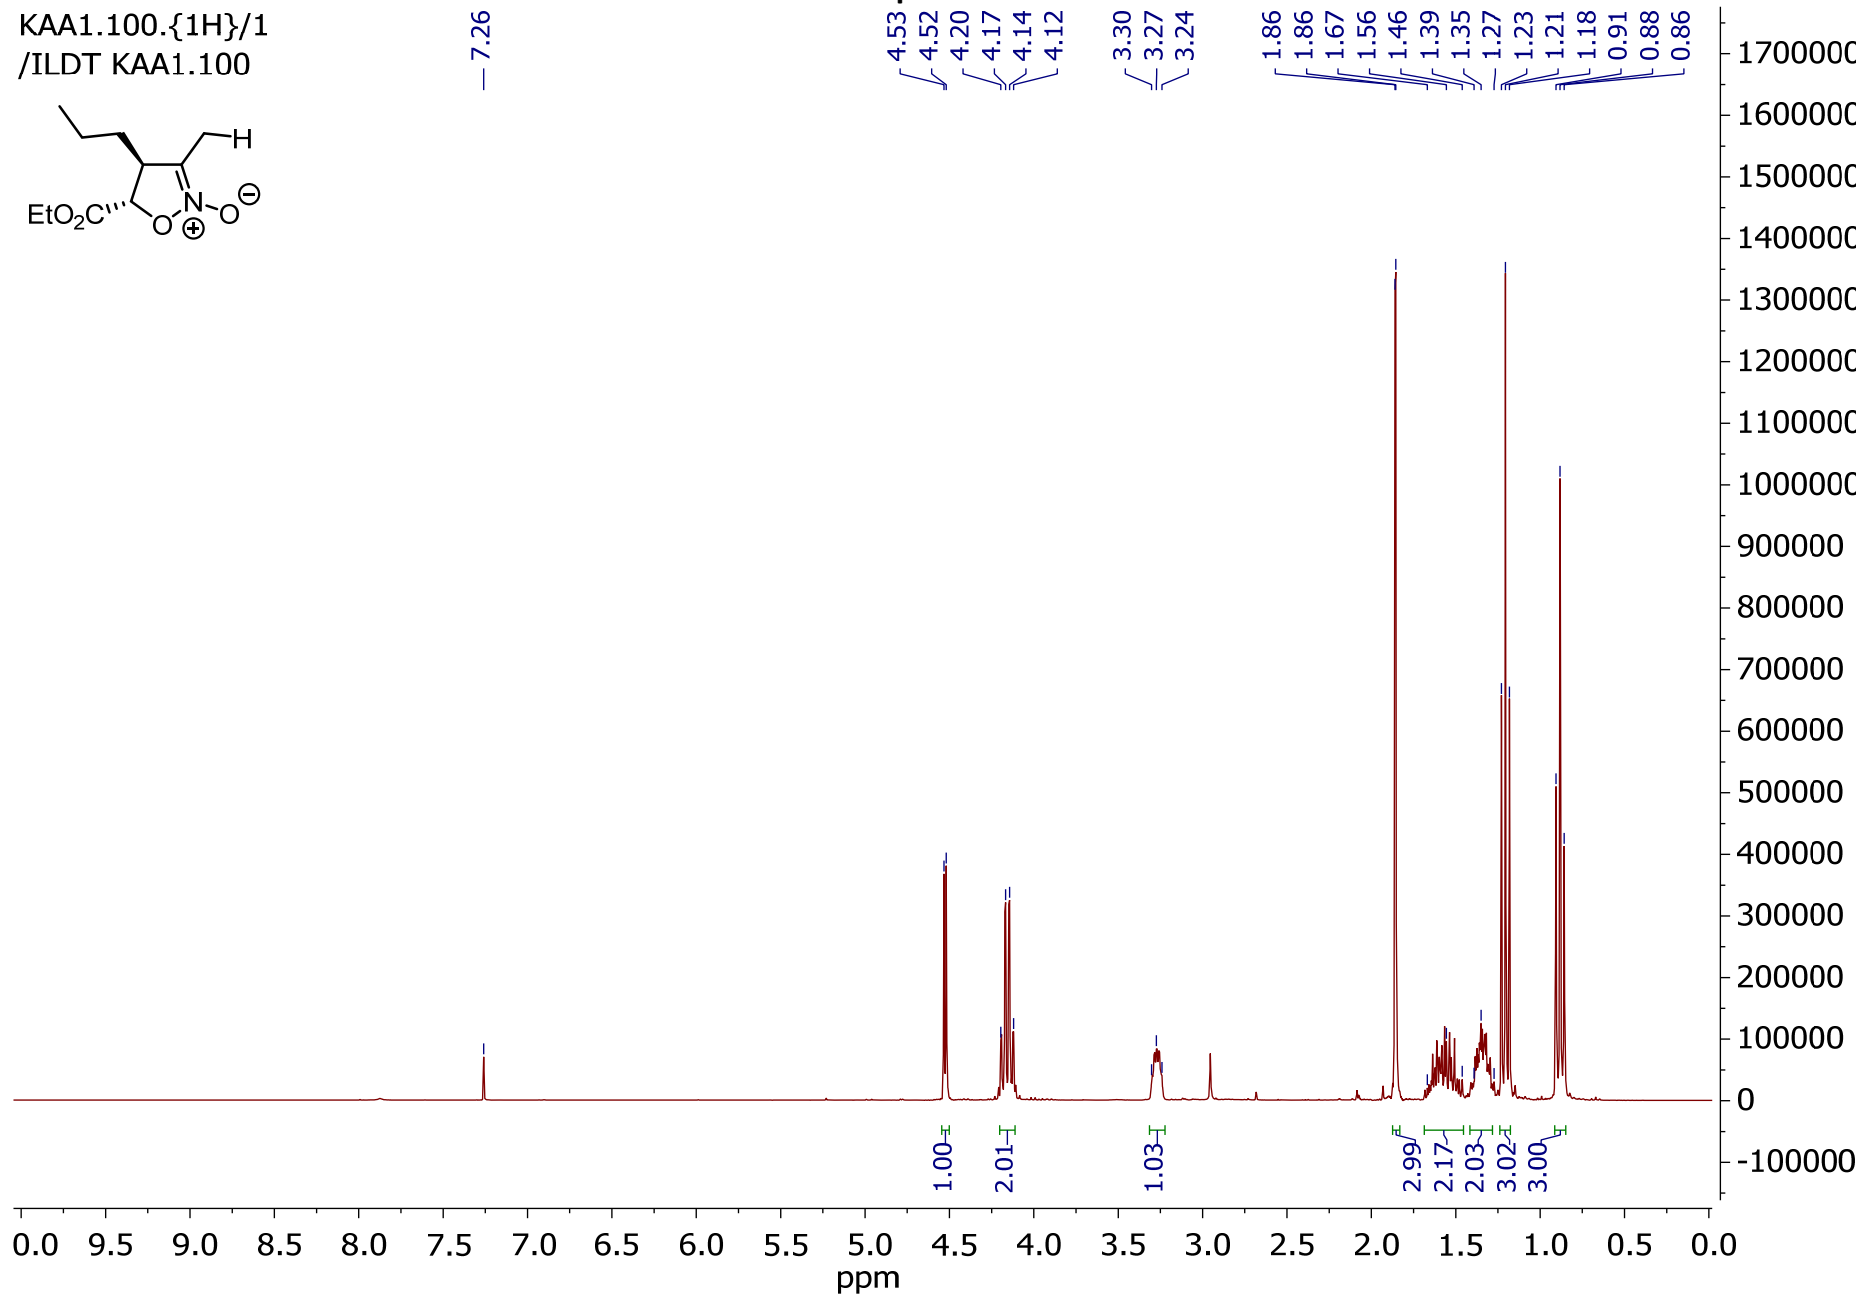

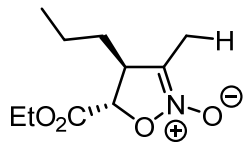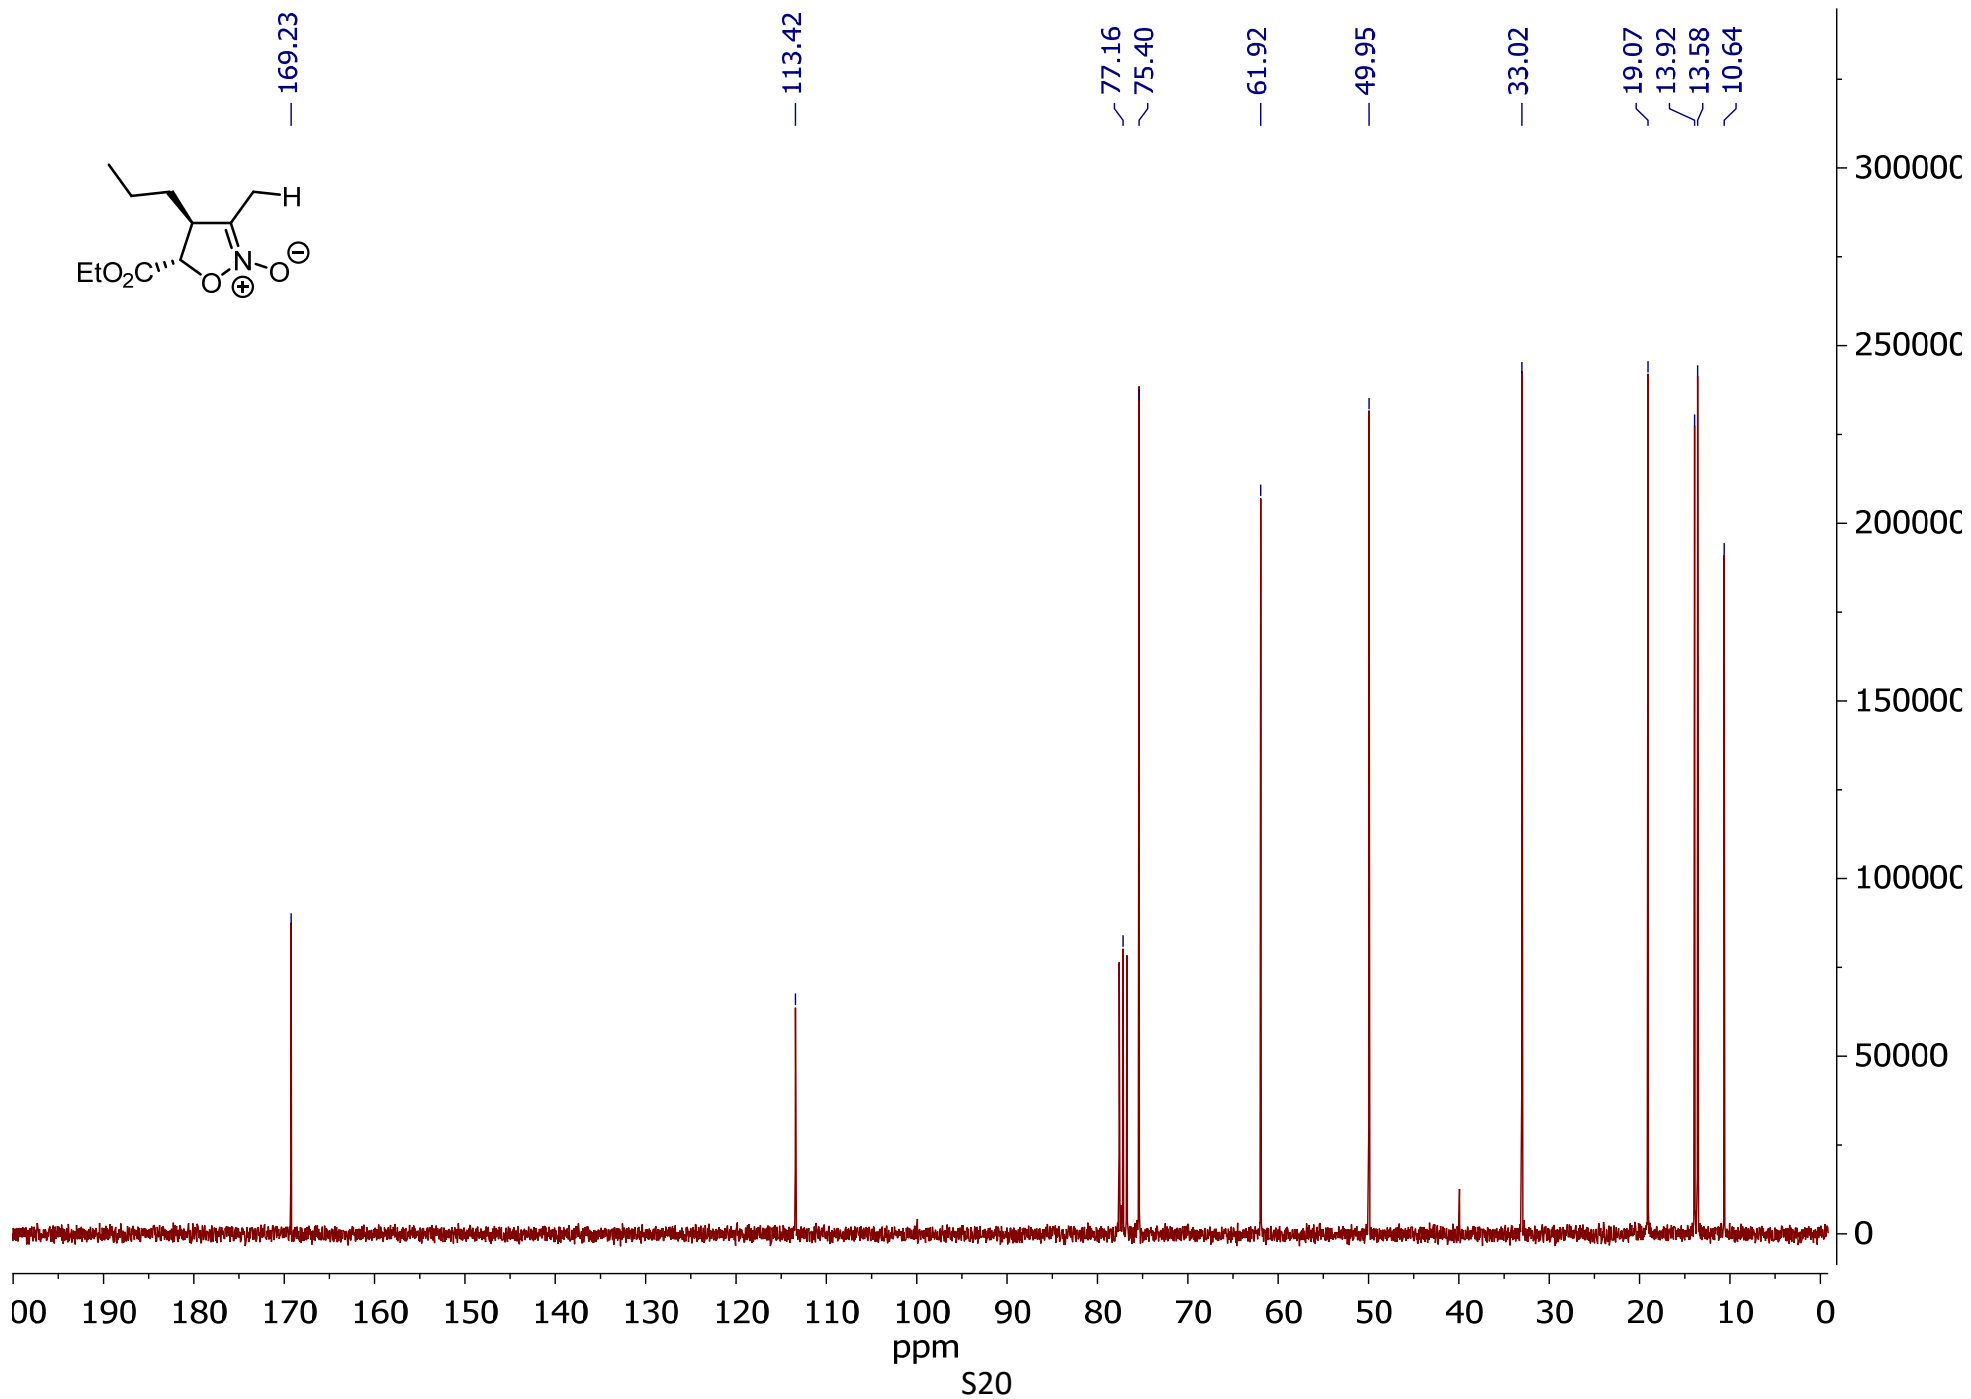

KAA1.100.{13C}deptsp135/3  
/ILDT KAA1.100

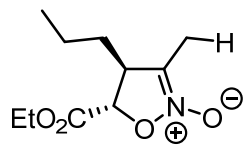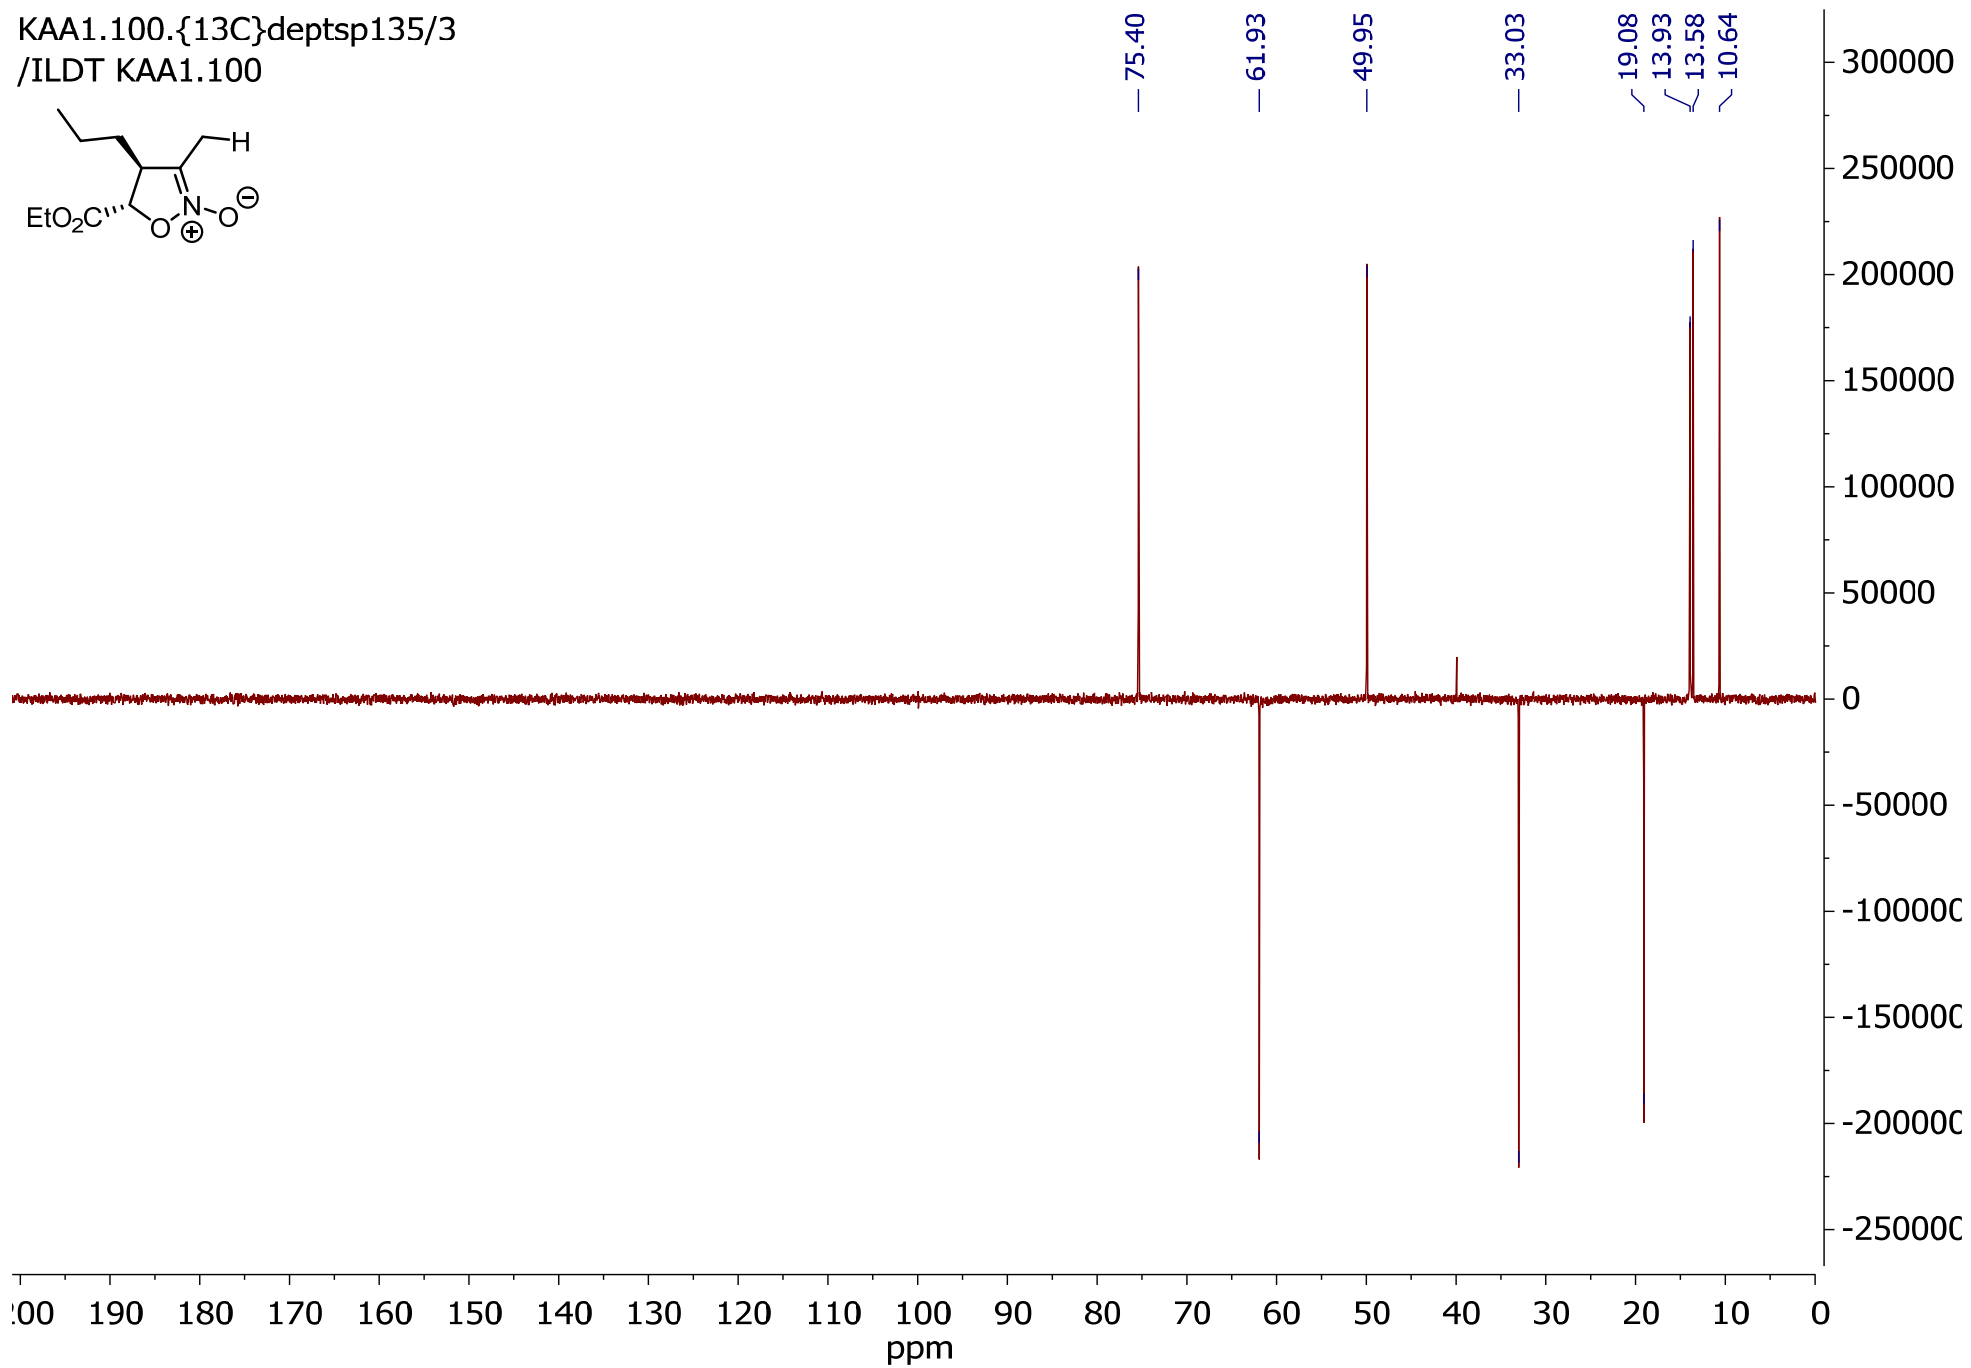

S21

UPY832.100.{1H}/1  
/ILD T UPY832.100

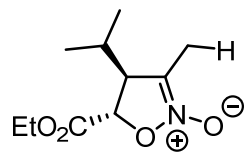

— 7.26

### NMR spectra of 8b

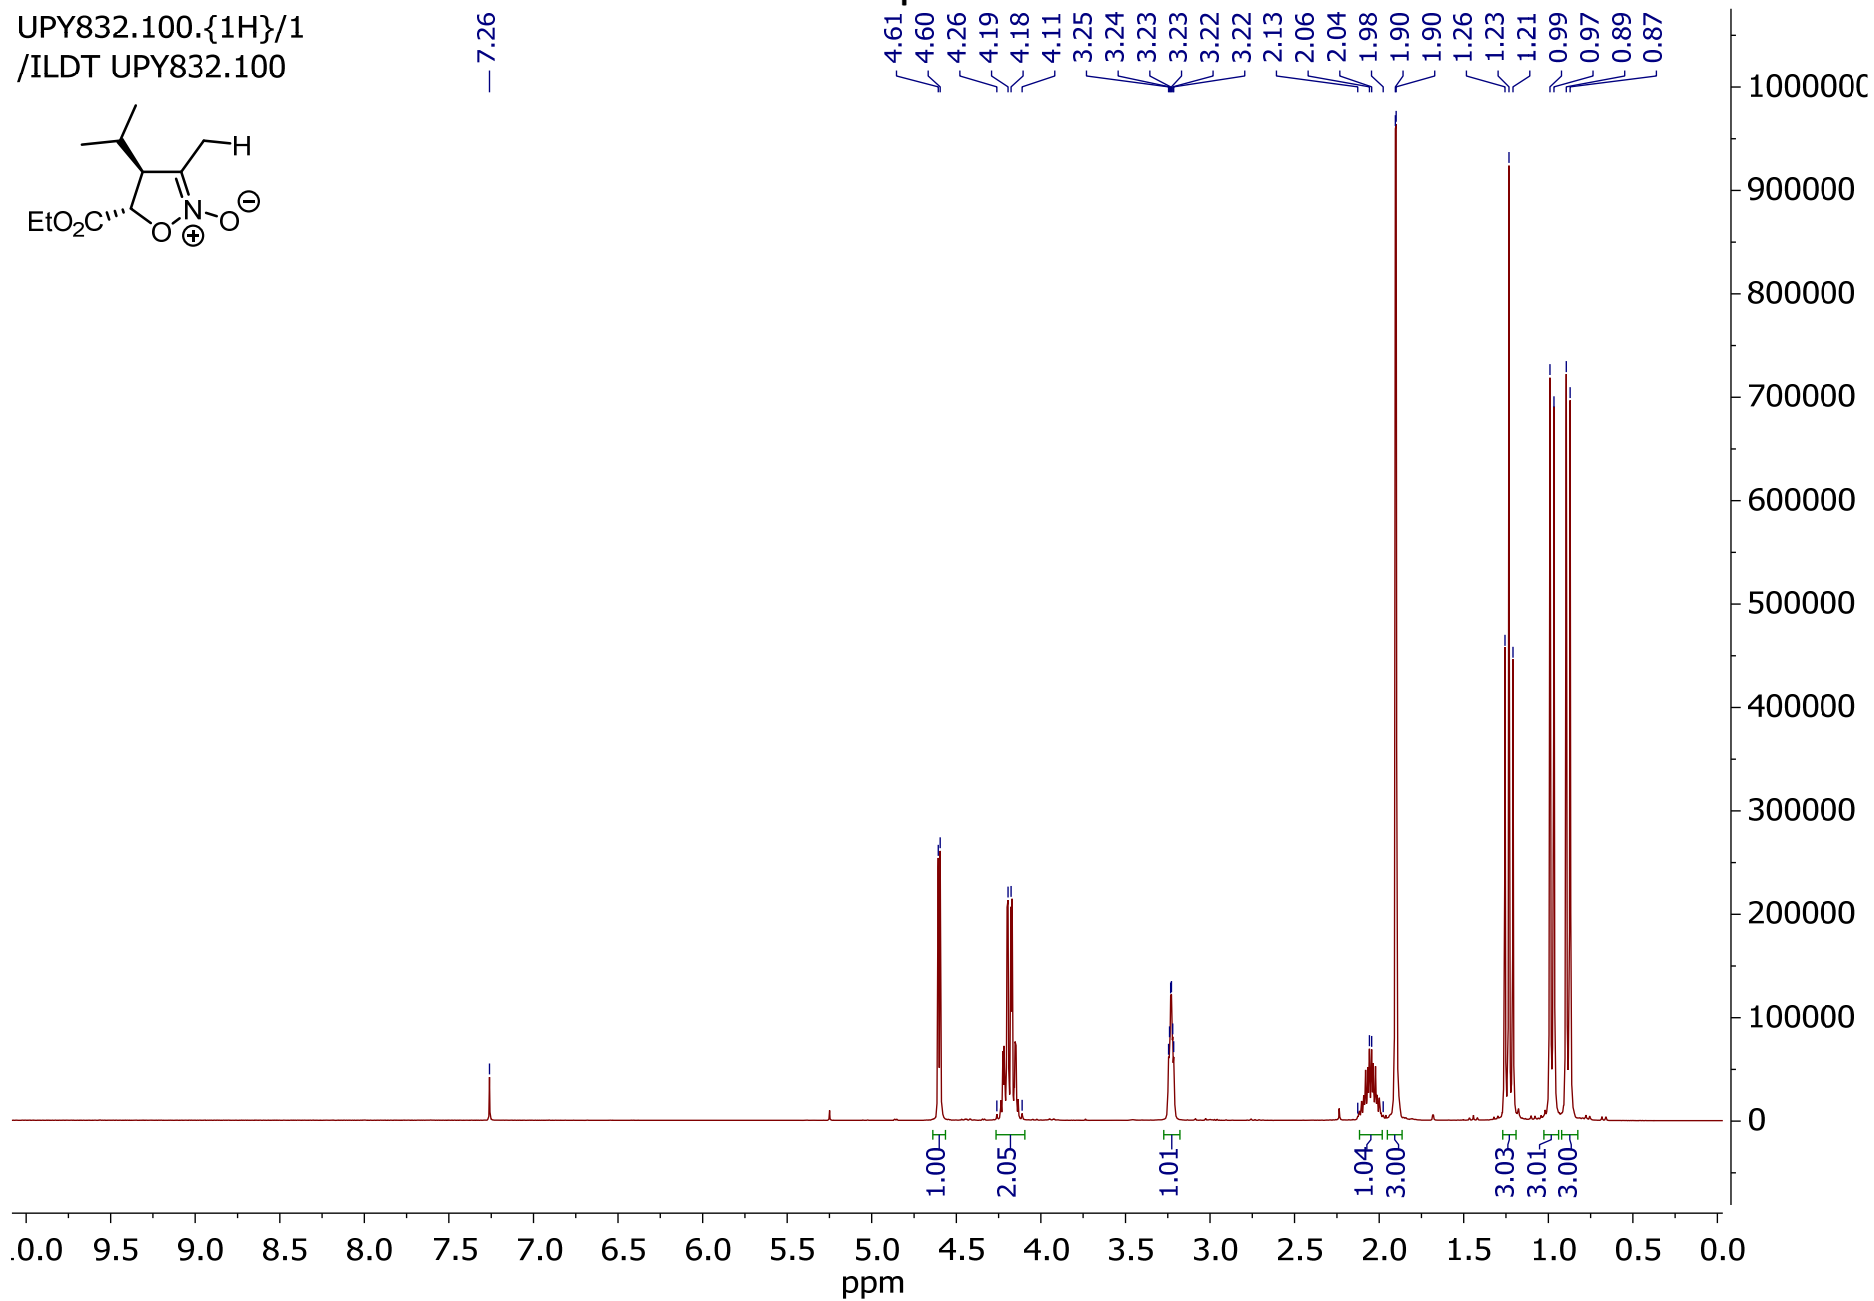

UPY832.100.{13C}/2  
/ILD T UPY832.100

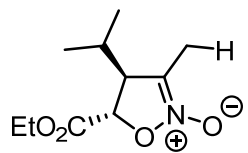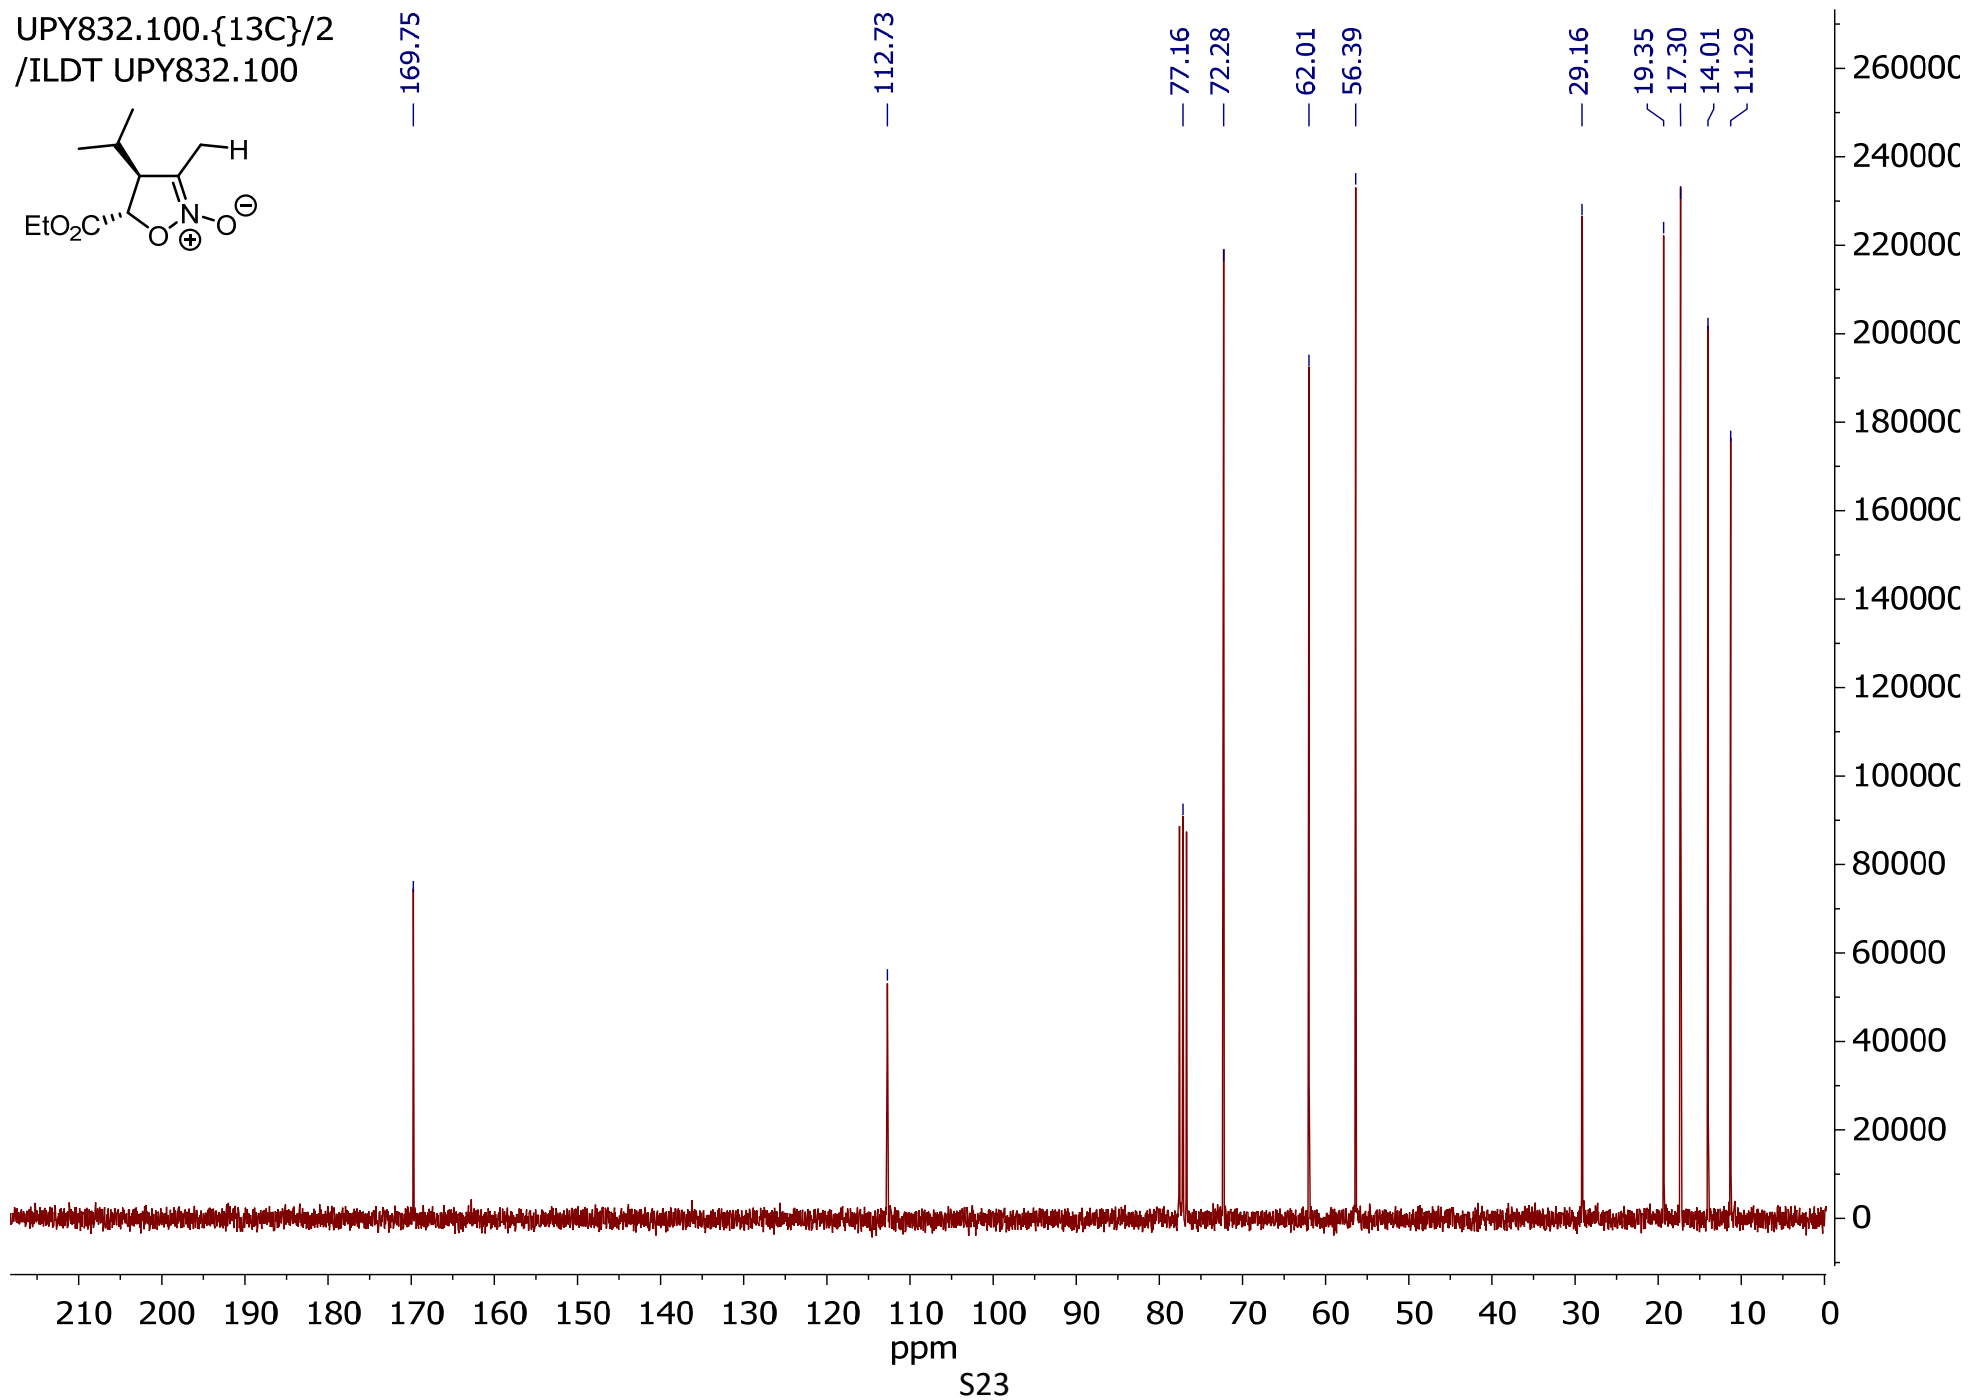

UPY832.100.{13C}deptsp135/3  
/ILDIT UPY832.100

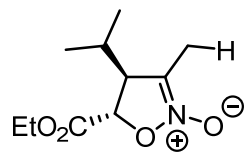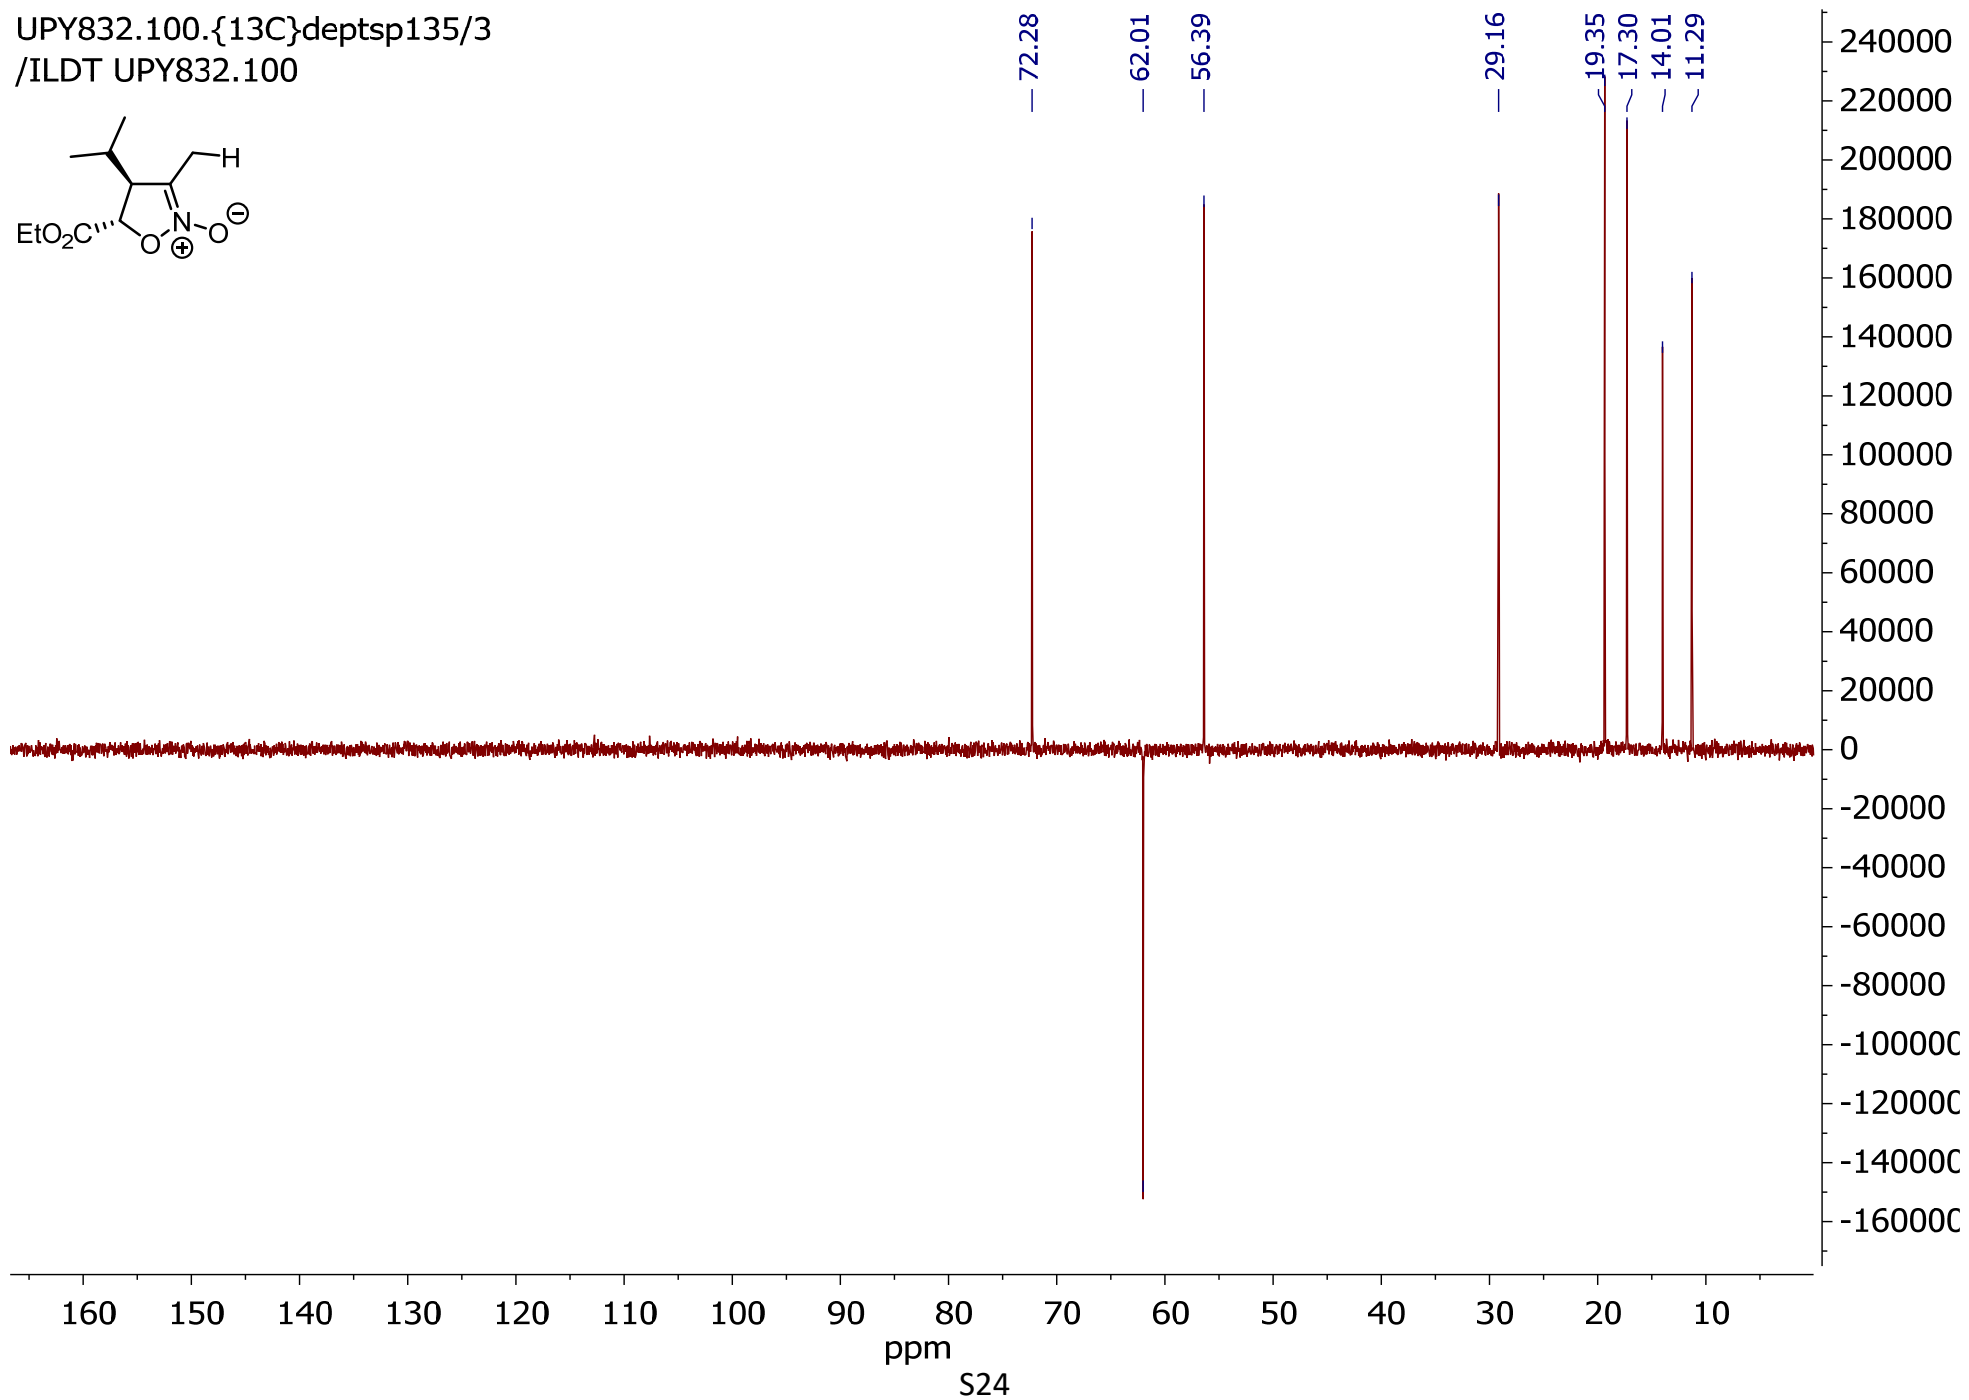



UPY785.100.{1H}/1  
/ILDY UPY785.100

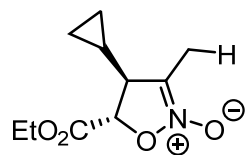

### NMR spectra of 8c

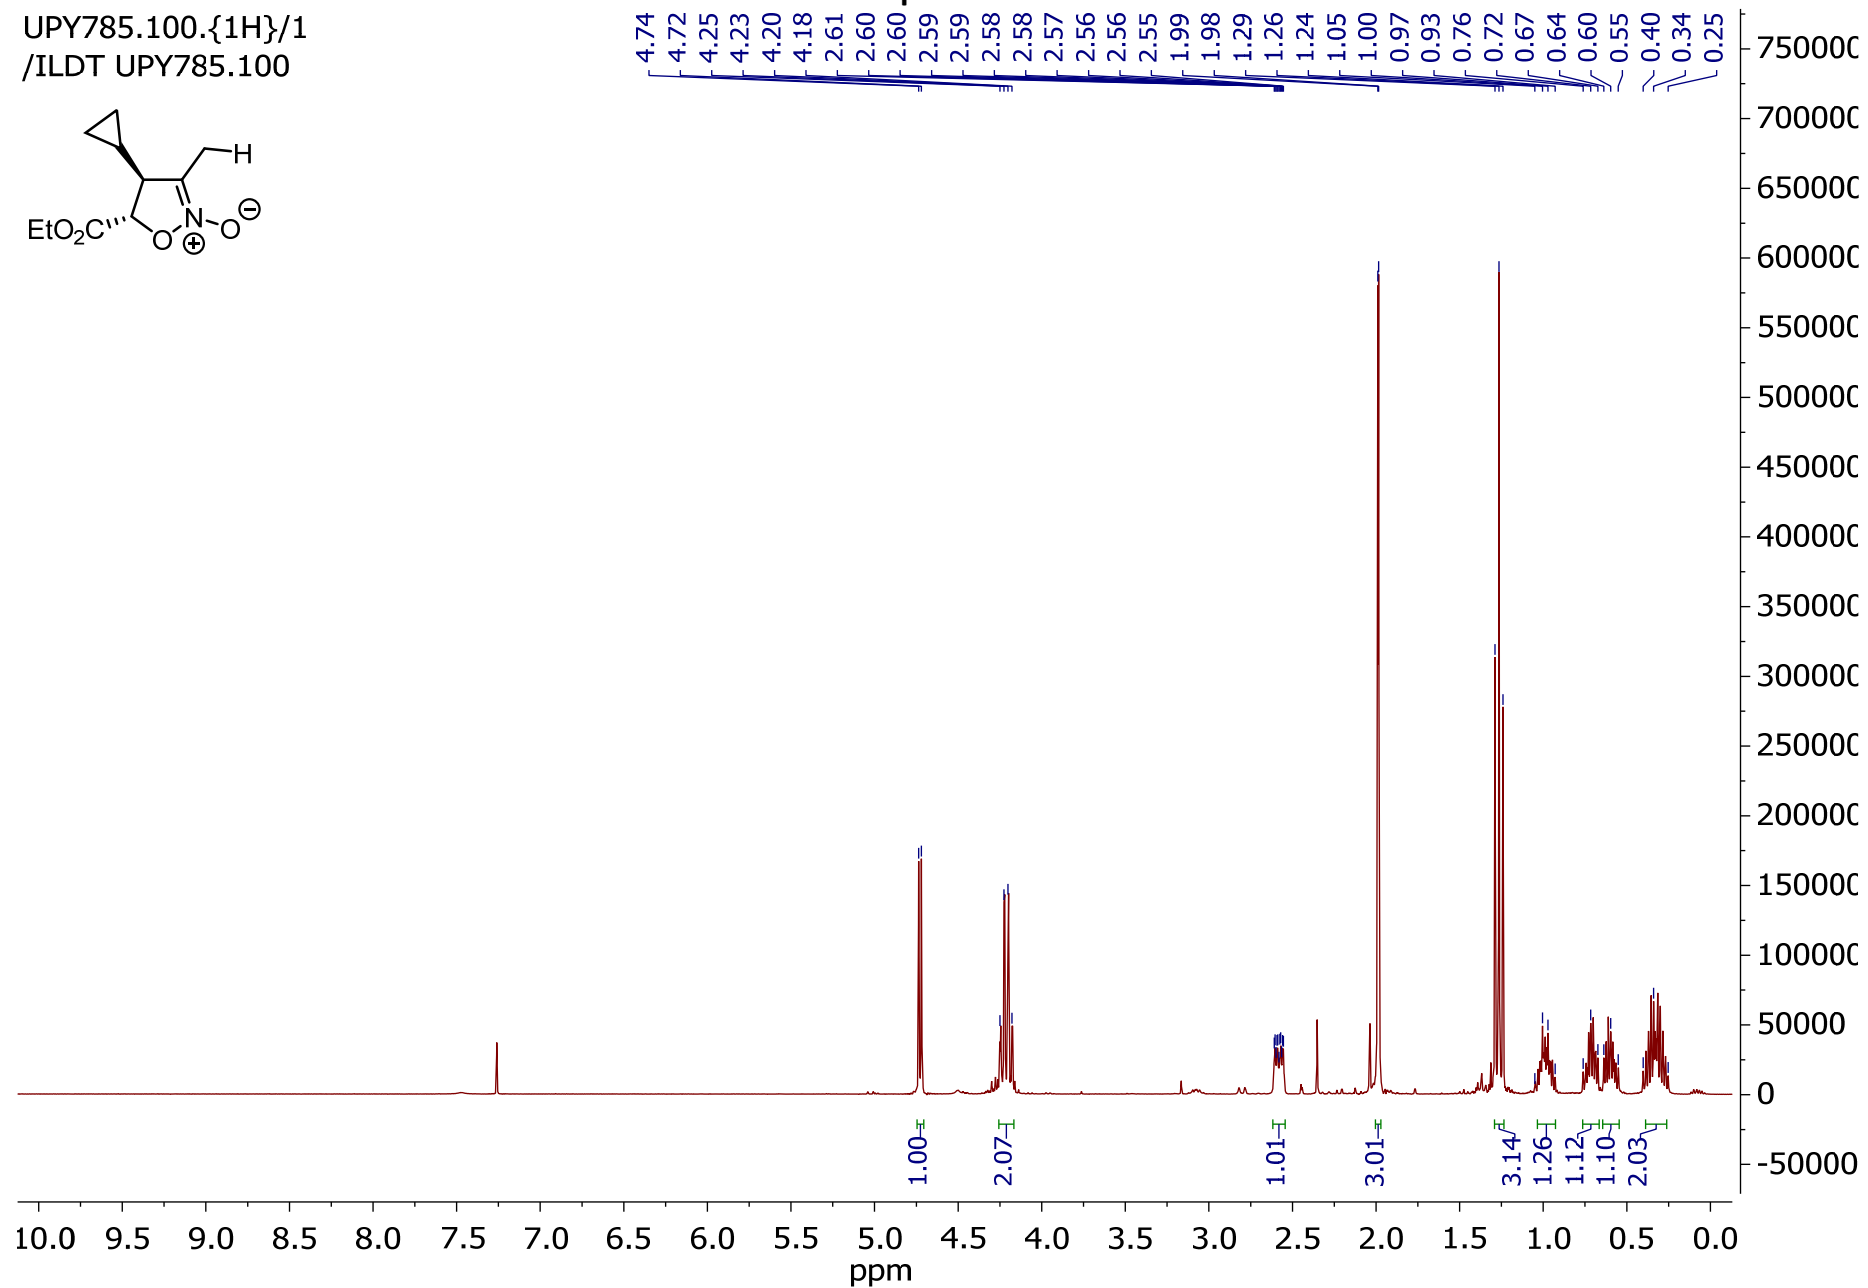

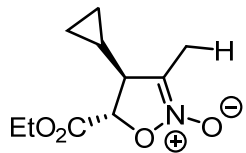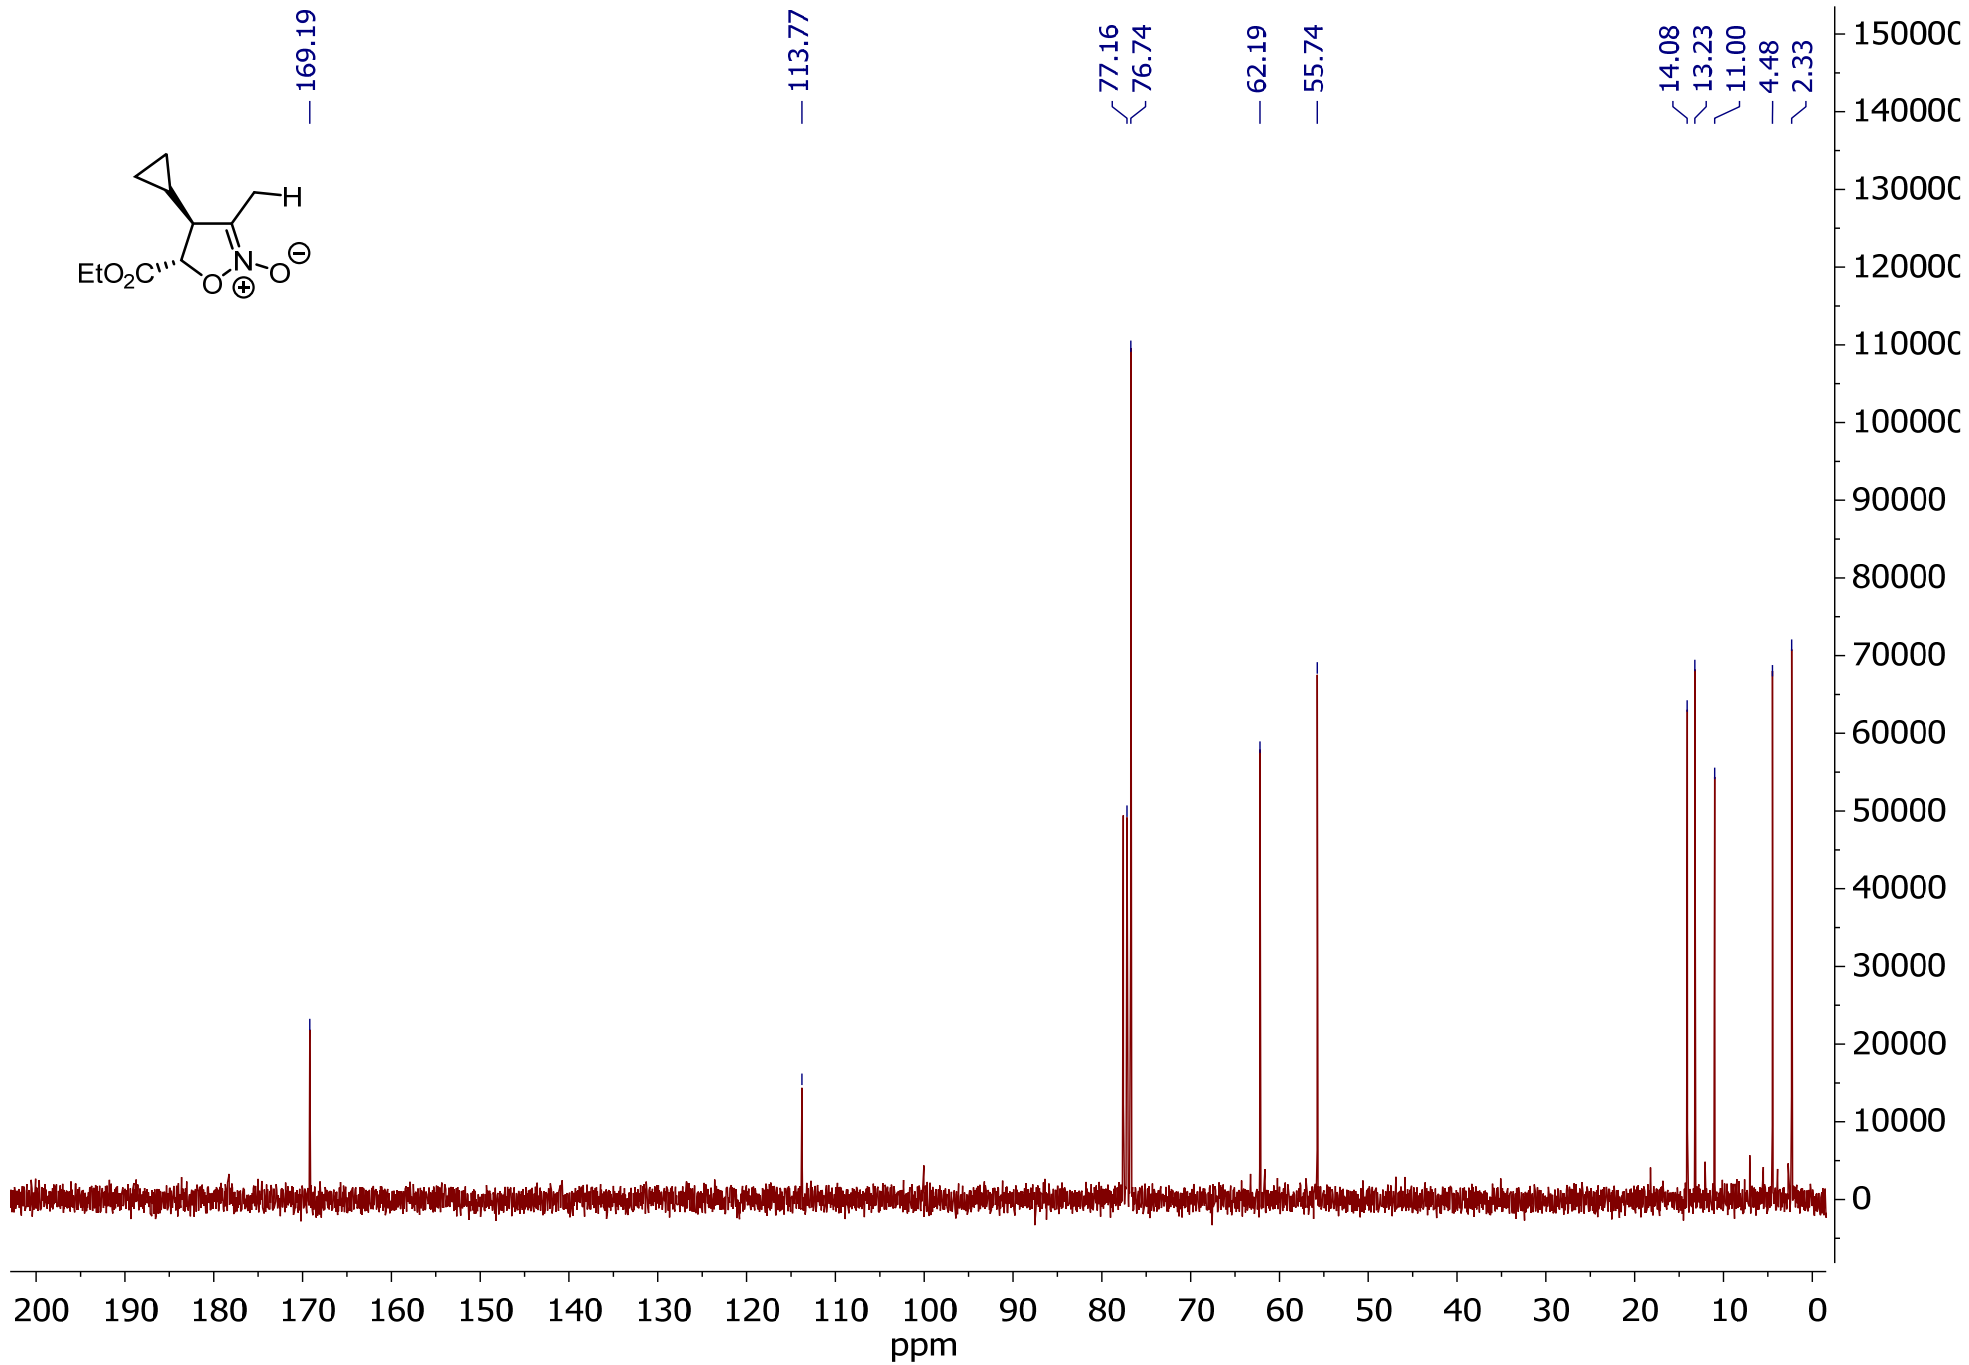

UPY785.100.{13C}deptsp135/3  
/ILDIT UPY785.100

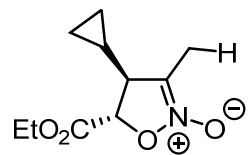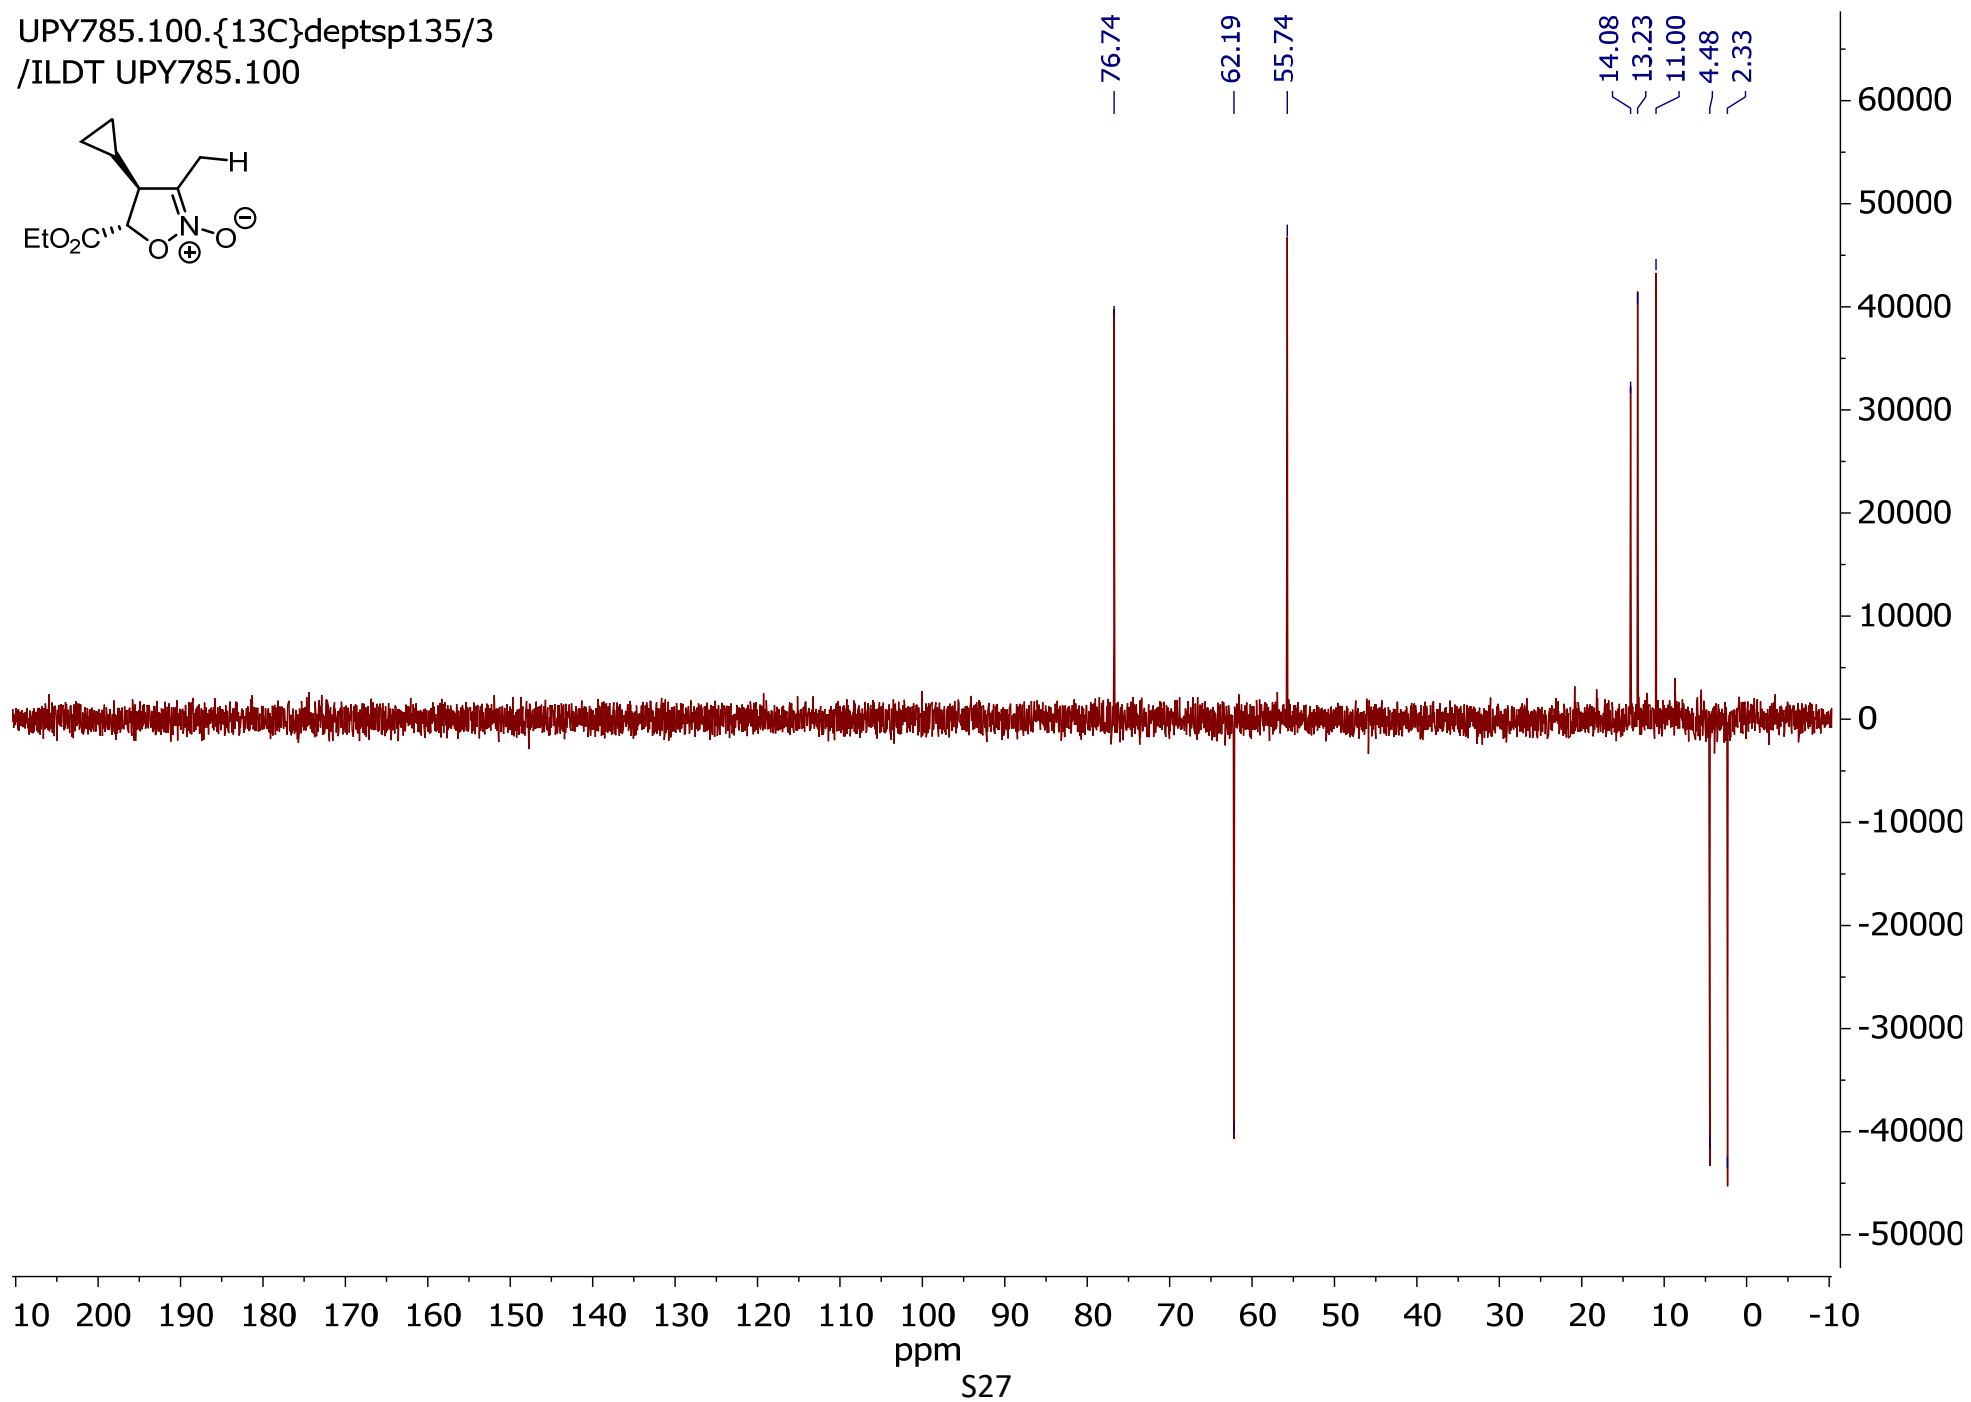

# NMR spectra of 12a

UPY796.300 (1H) /ILDT UPY796.300

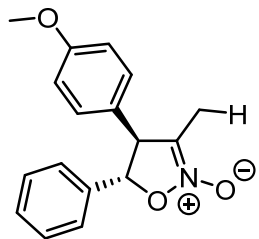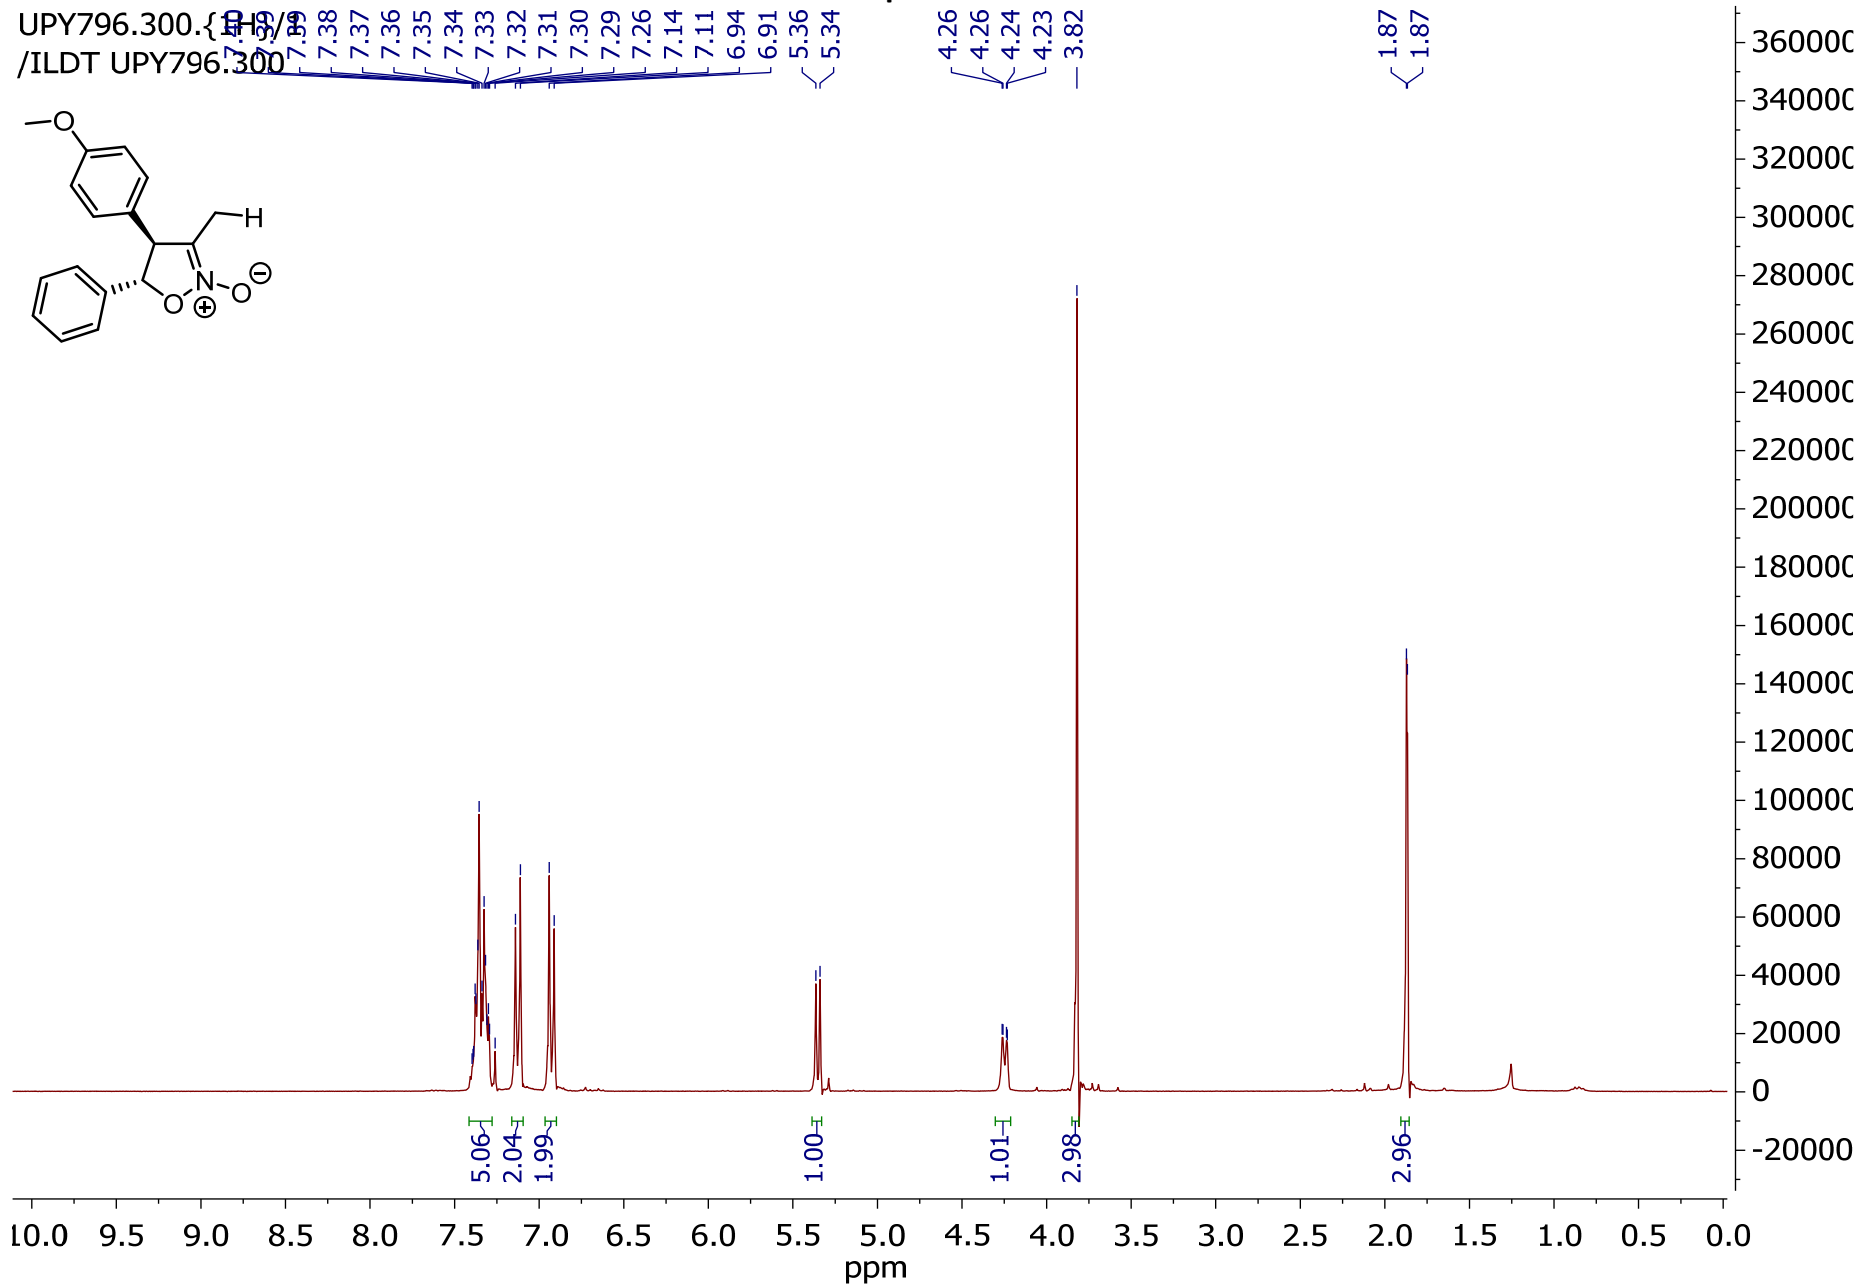

UPY796.300.{13C}/2  
/ILD T UPY796.300

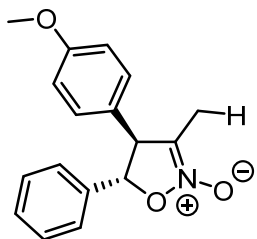

— 159.84

138.23

129.11

129.08

129.01

128.84

125.57

115.41

114.94

— 84.36

— 77.16

— 60.80

— 55.46

— 11.03

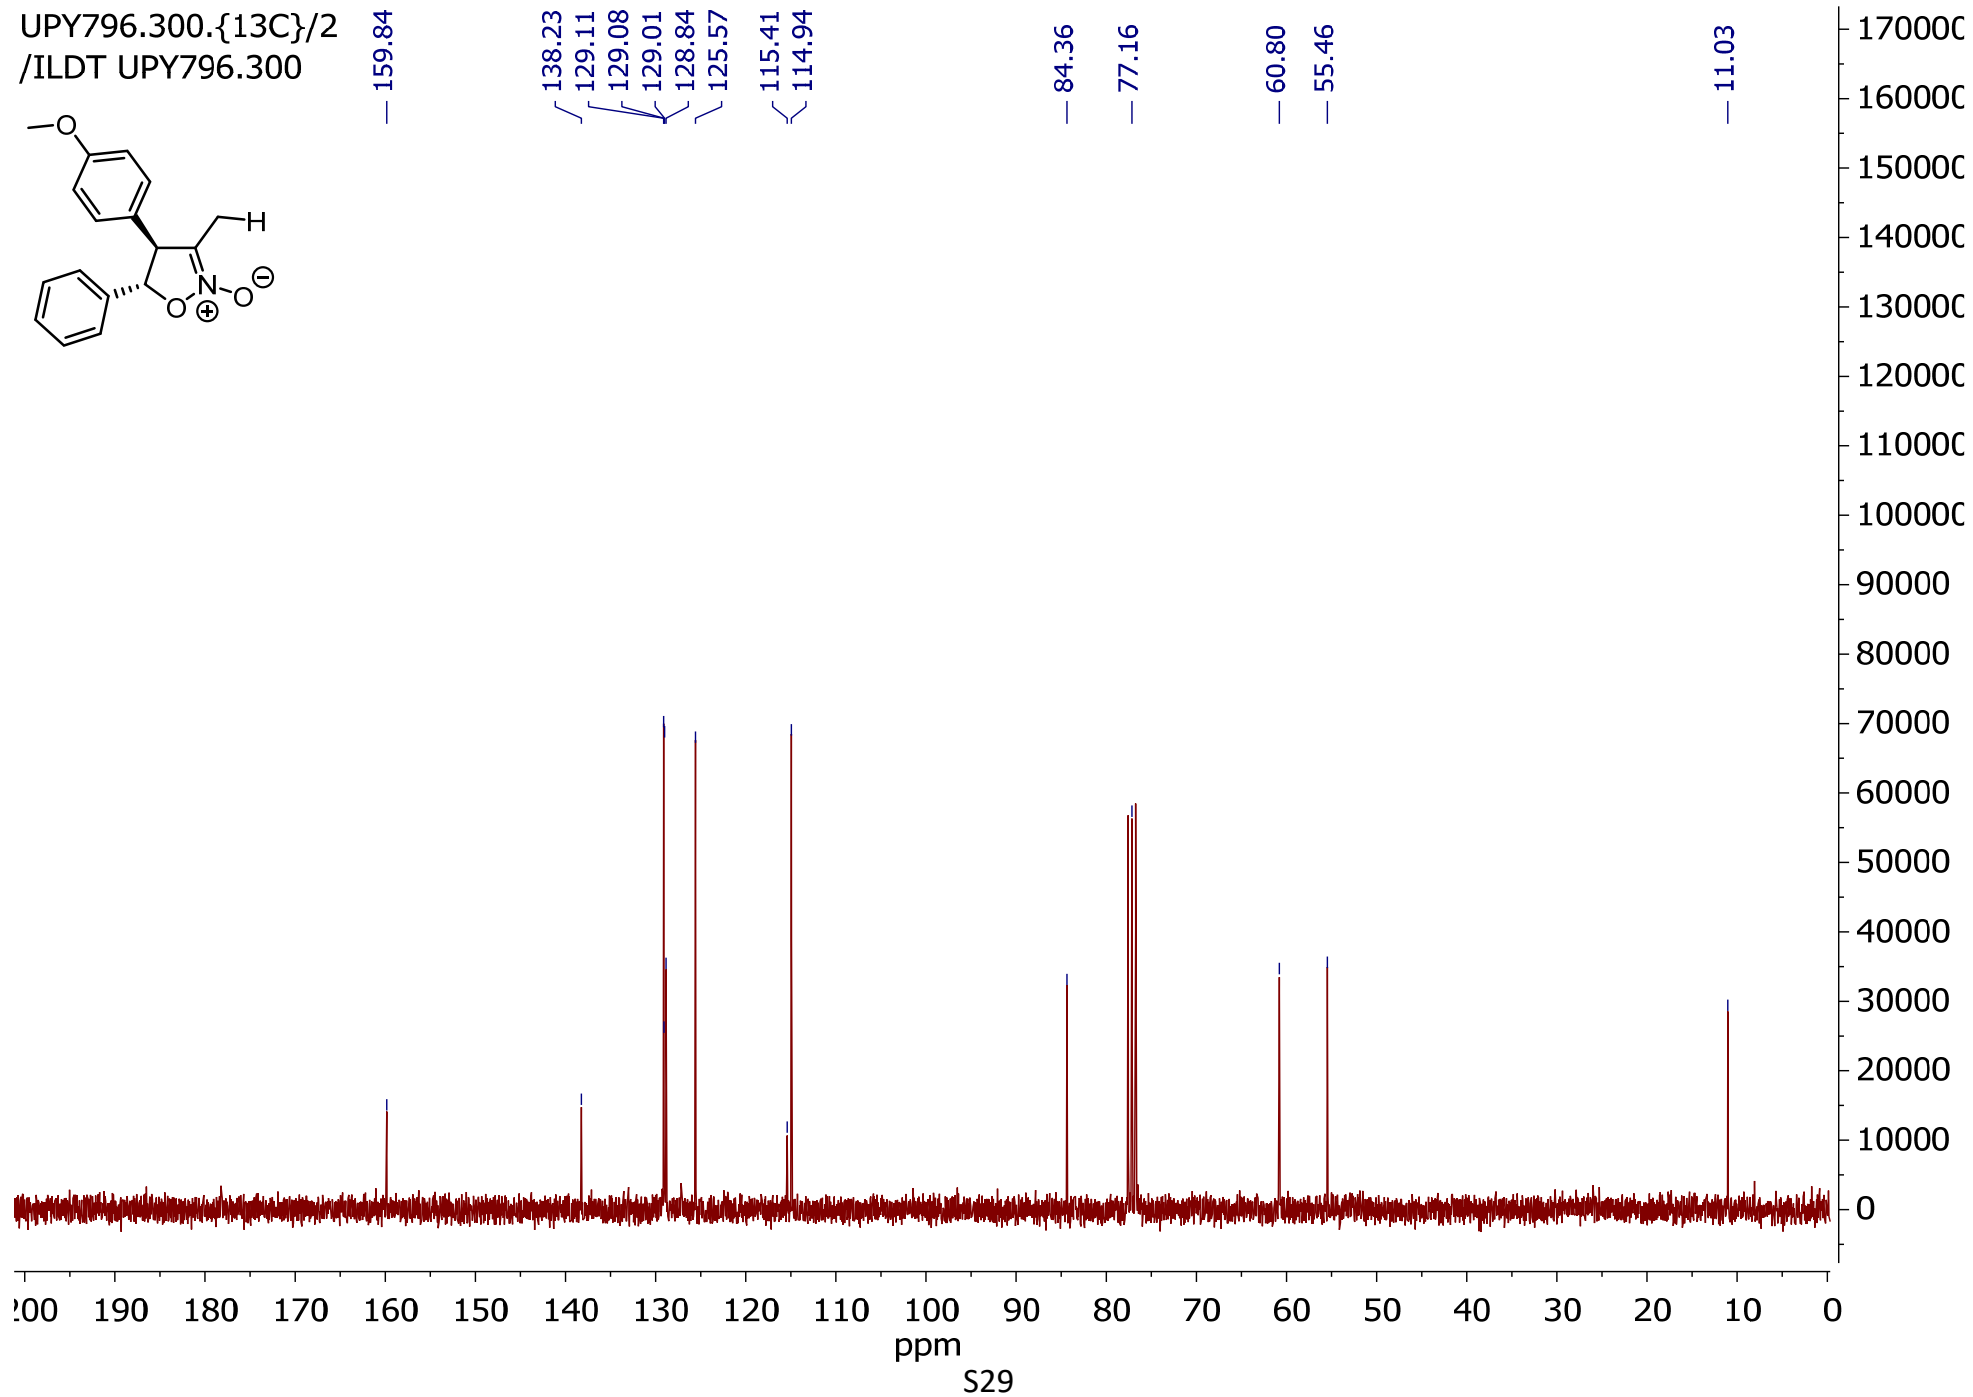

UPY796.300.{13C}deptsp135/3  
/ILDIT UPY796.300

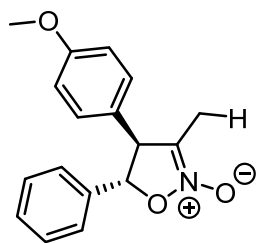

129.11  
129.01  
128.84  
125.57  
— 114.94

— 84.36

— 60.80

— 55.46

— 11.03

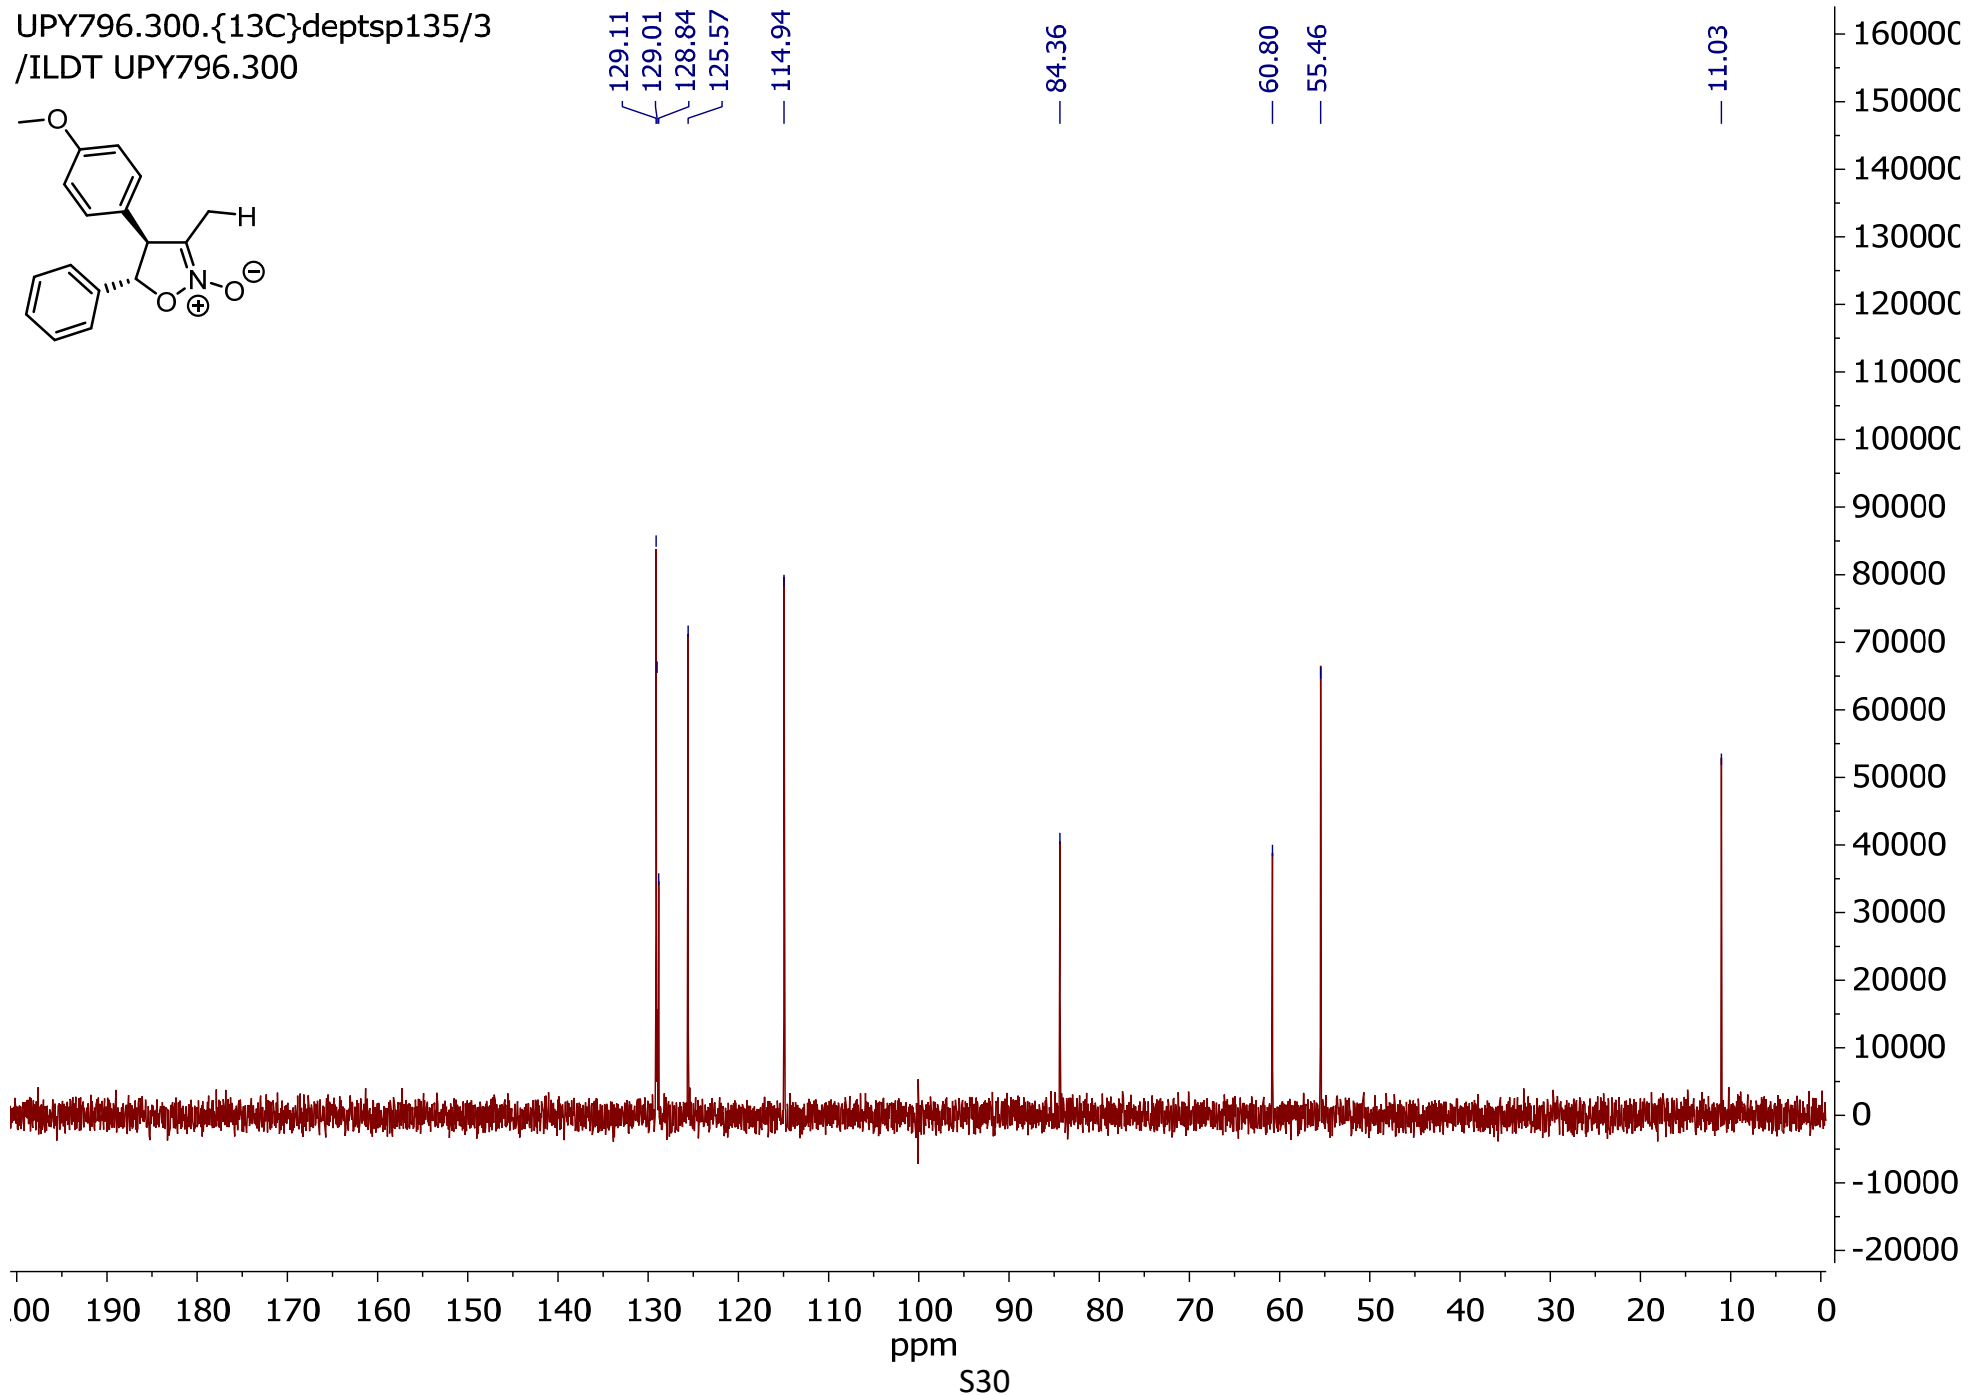

# NMR spectra of 13a

UPY801.100.{1H}/1

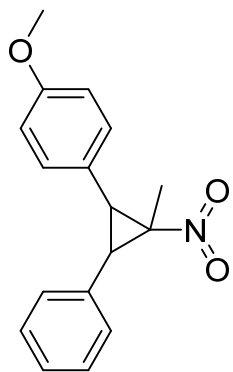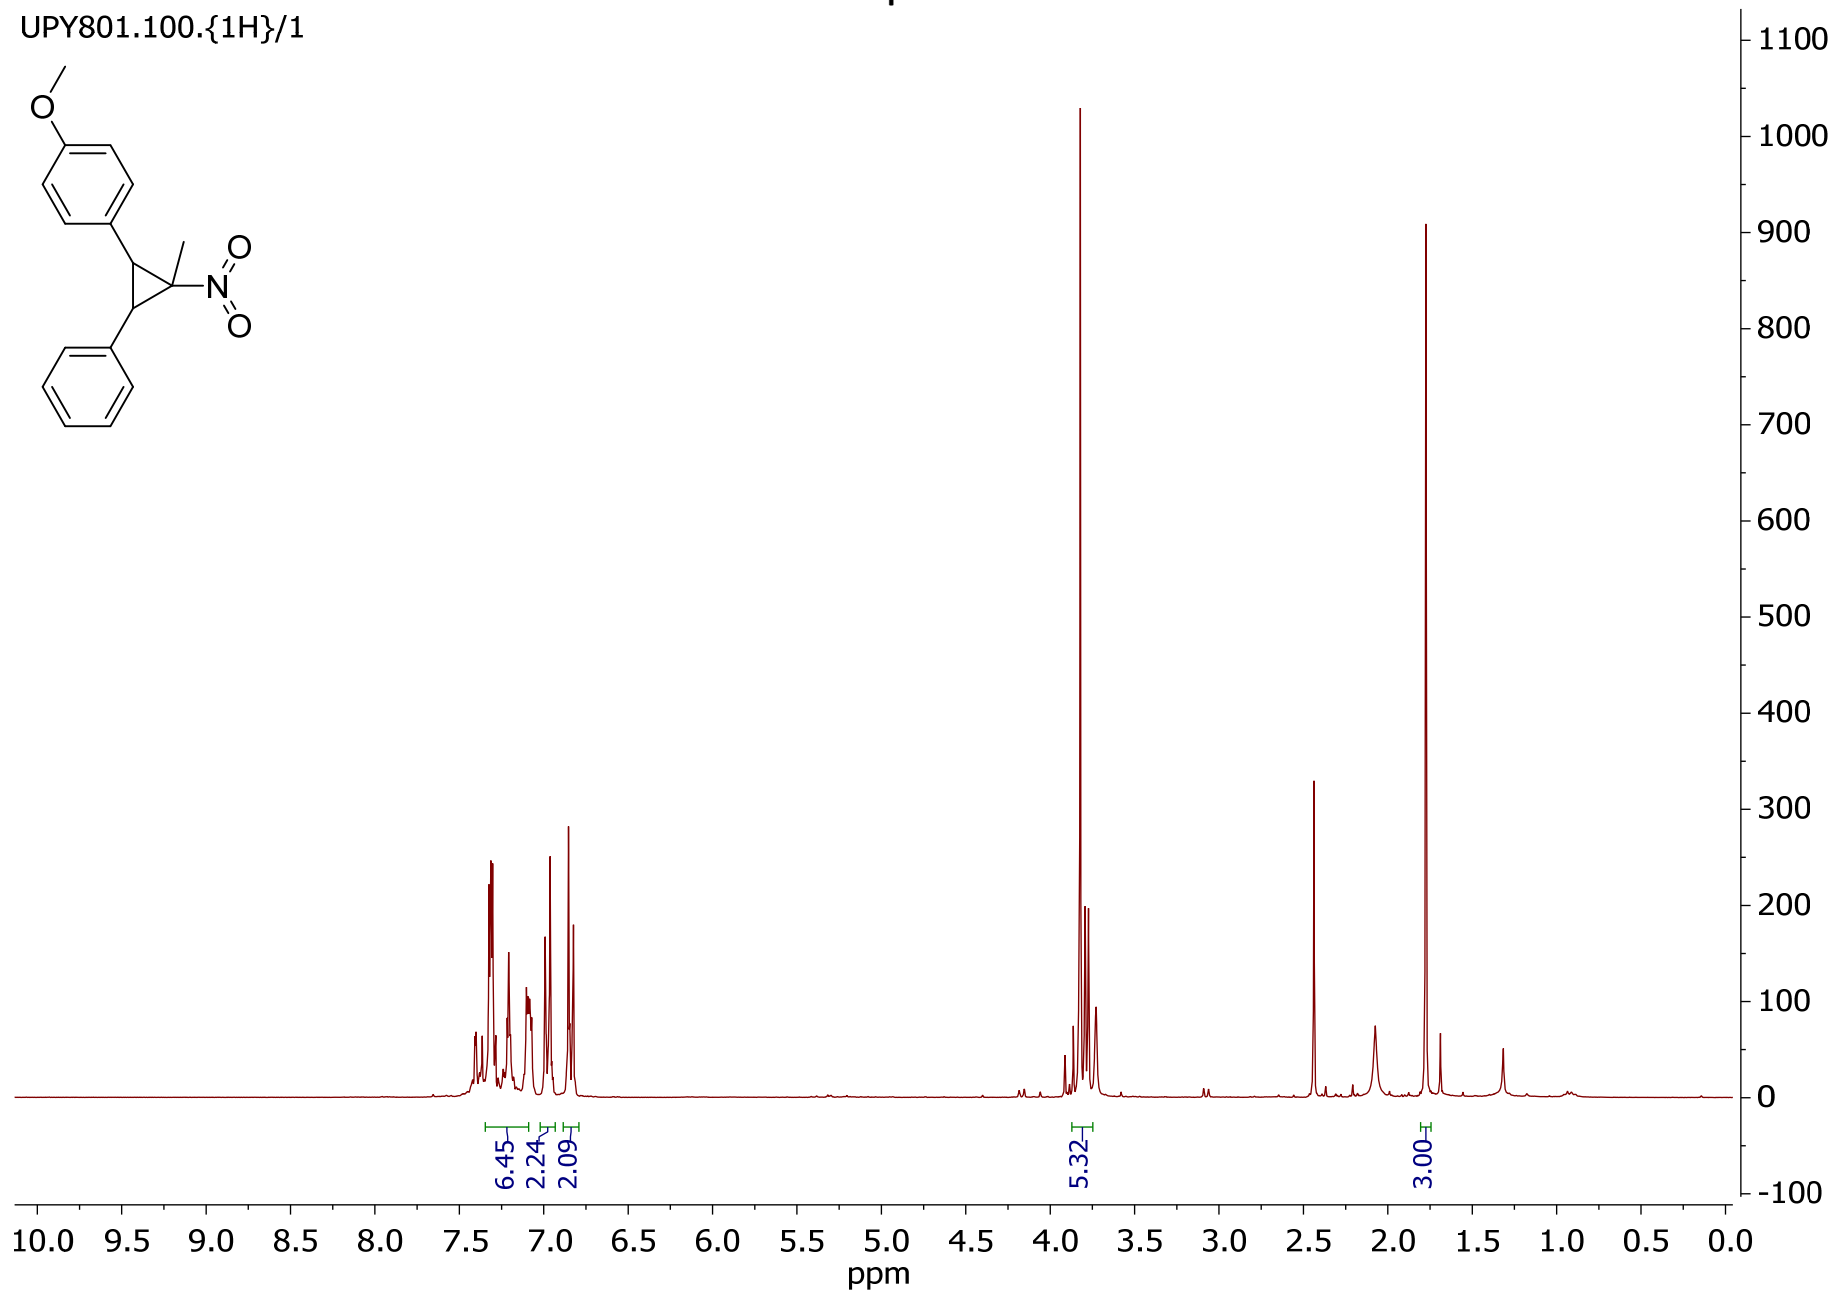

UPY801.100.{13C}/2

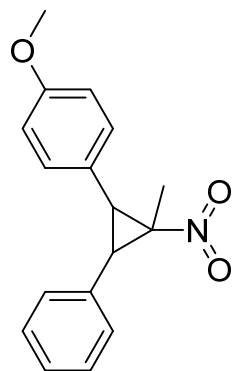

158.92  
132.74  
131.55  
130.48  
128.39  
127.45  
124.43  
113.85  
77.16  
70.10  
55.29  
37.77  
37.50  
12.75

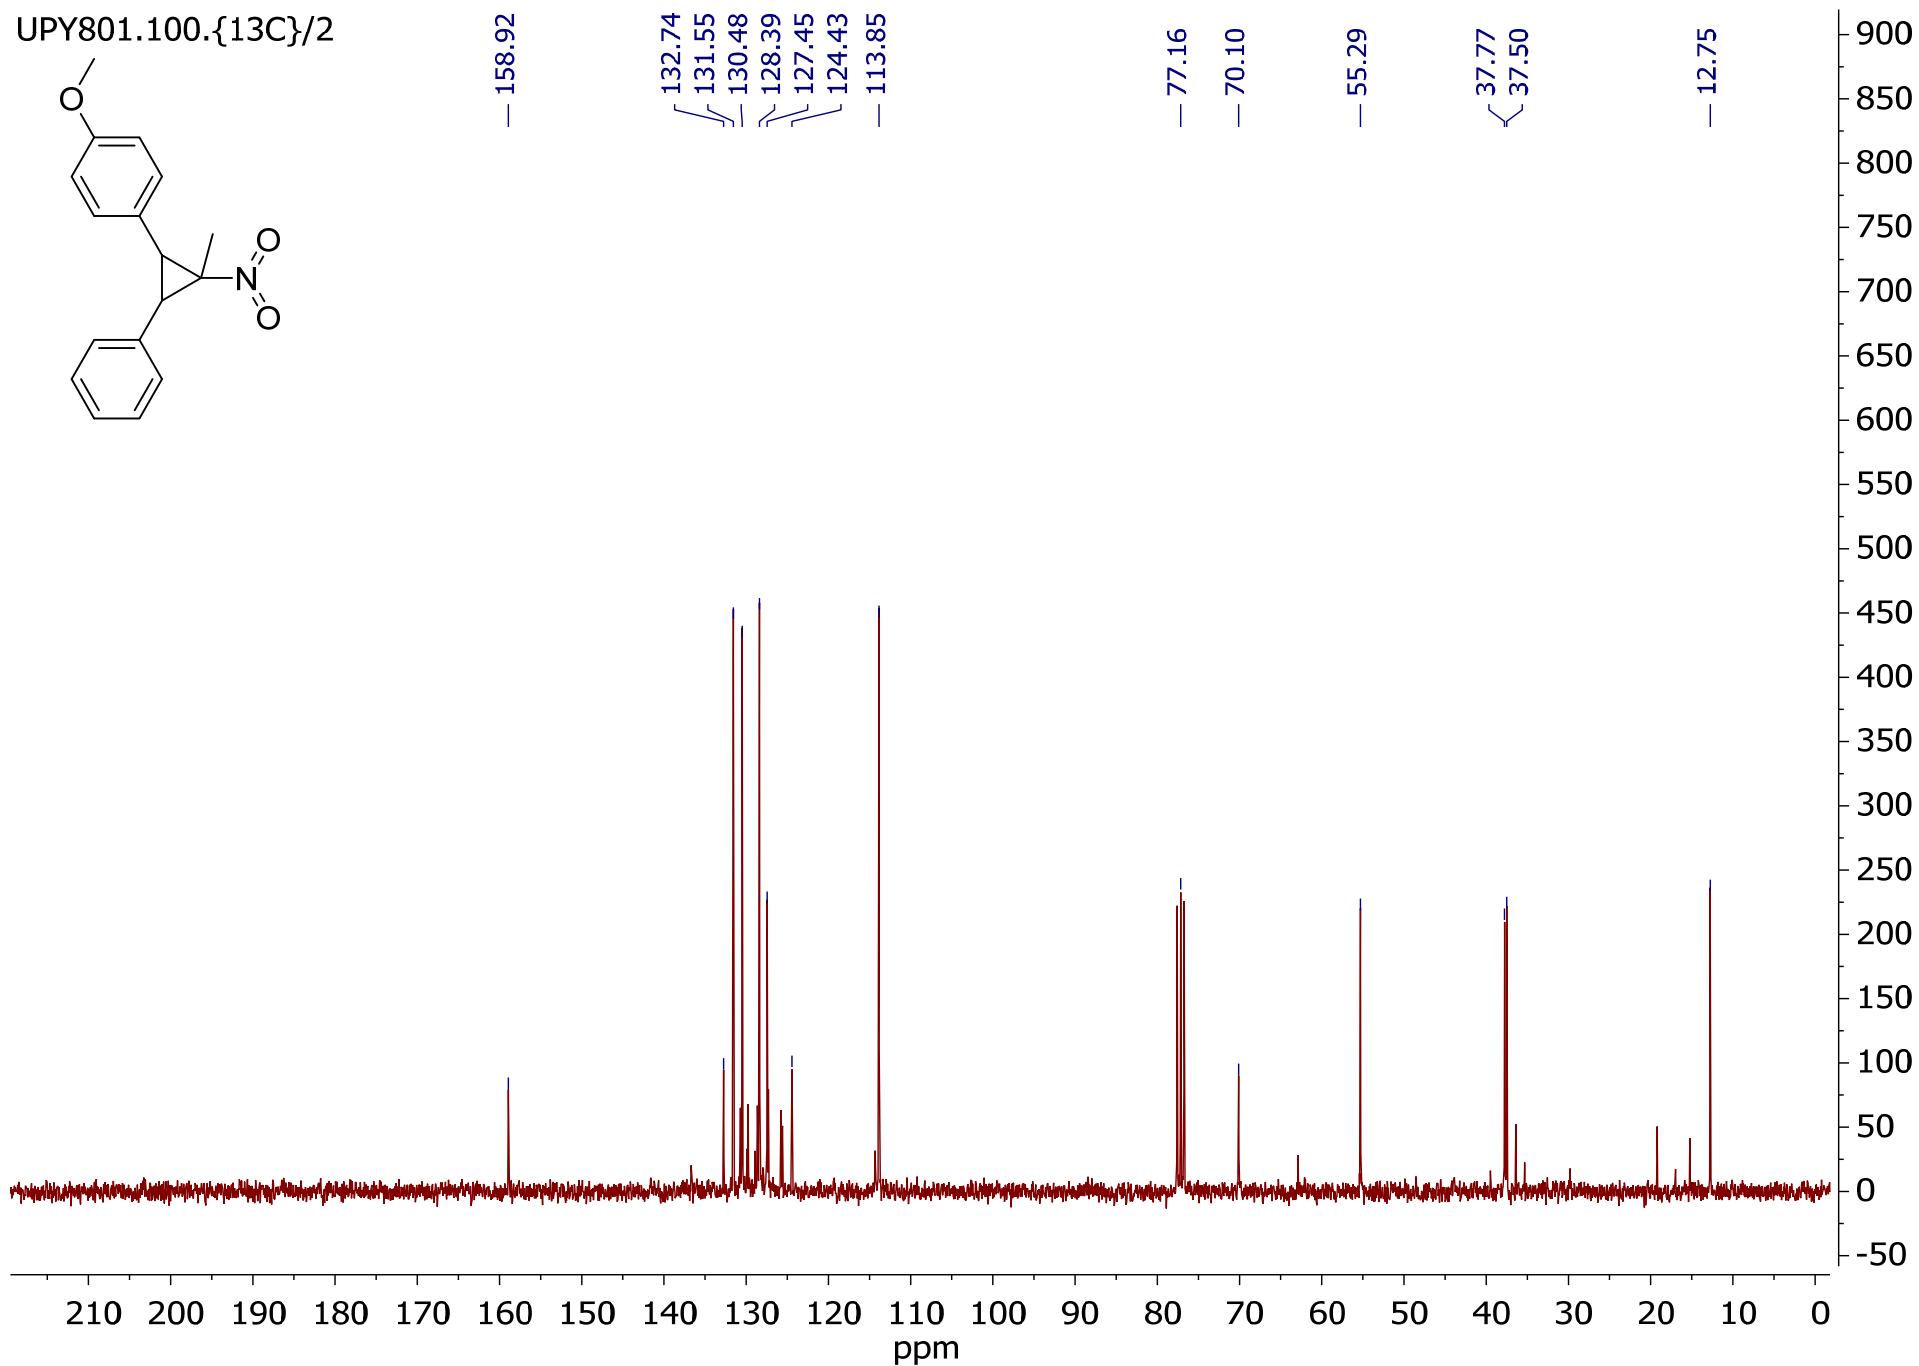



UPY801.100.{13C}deptsp135/3

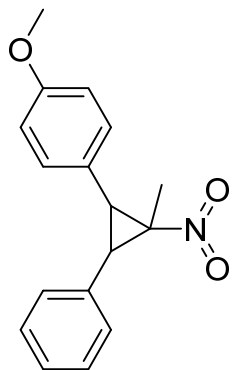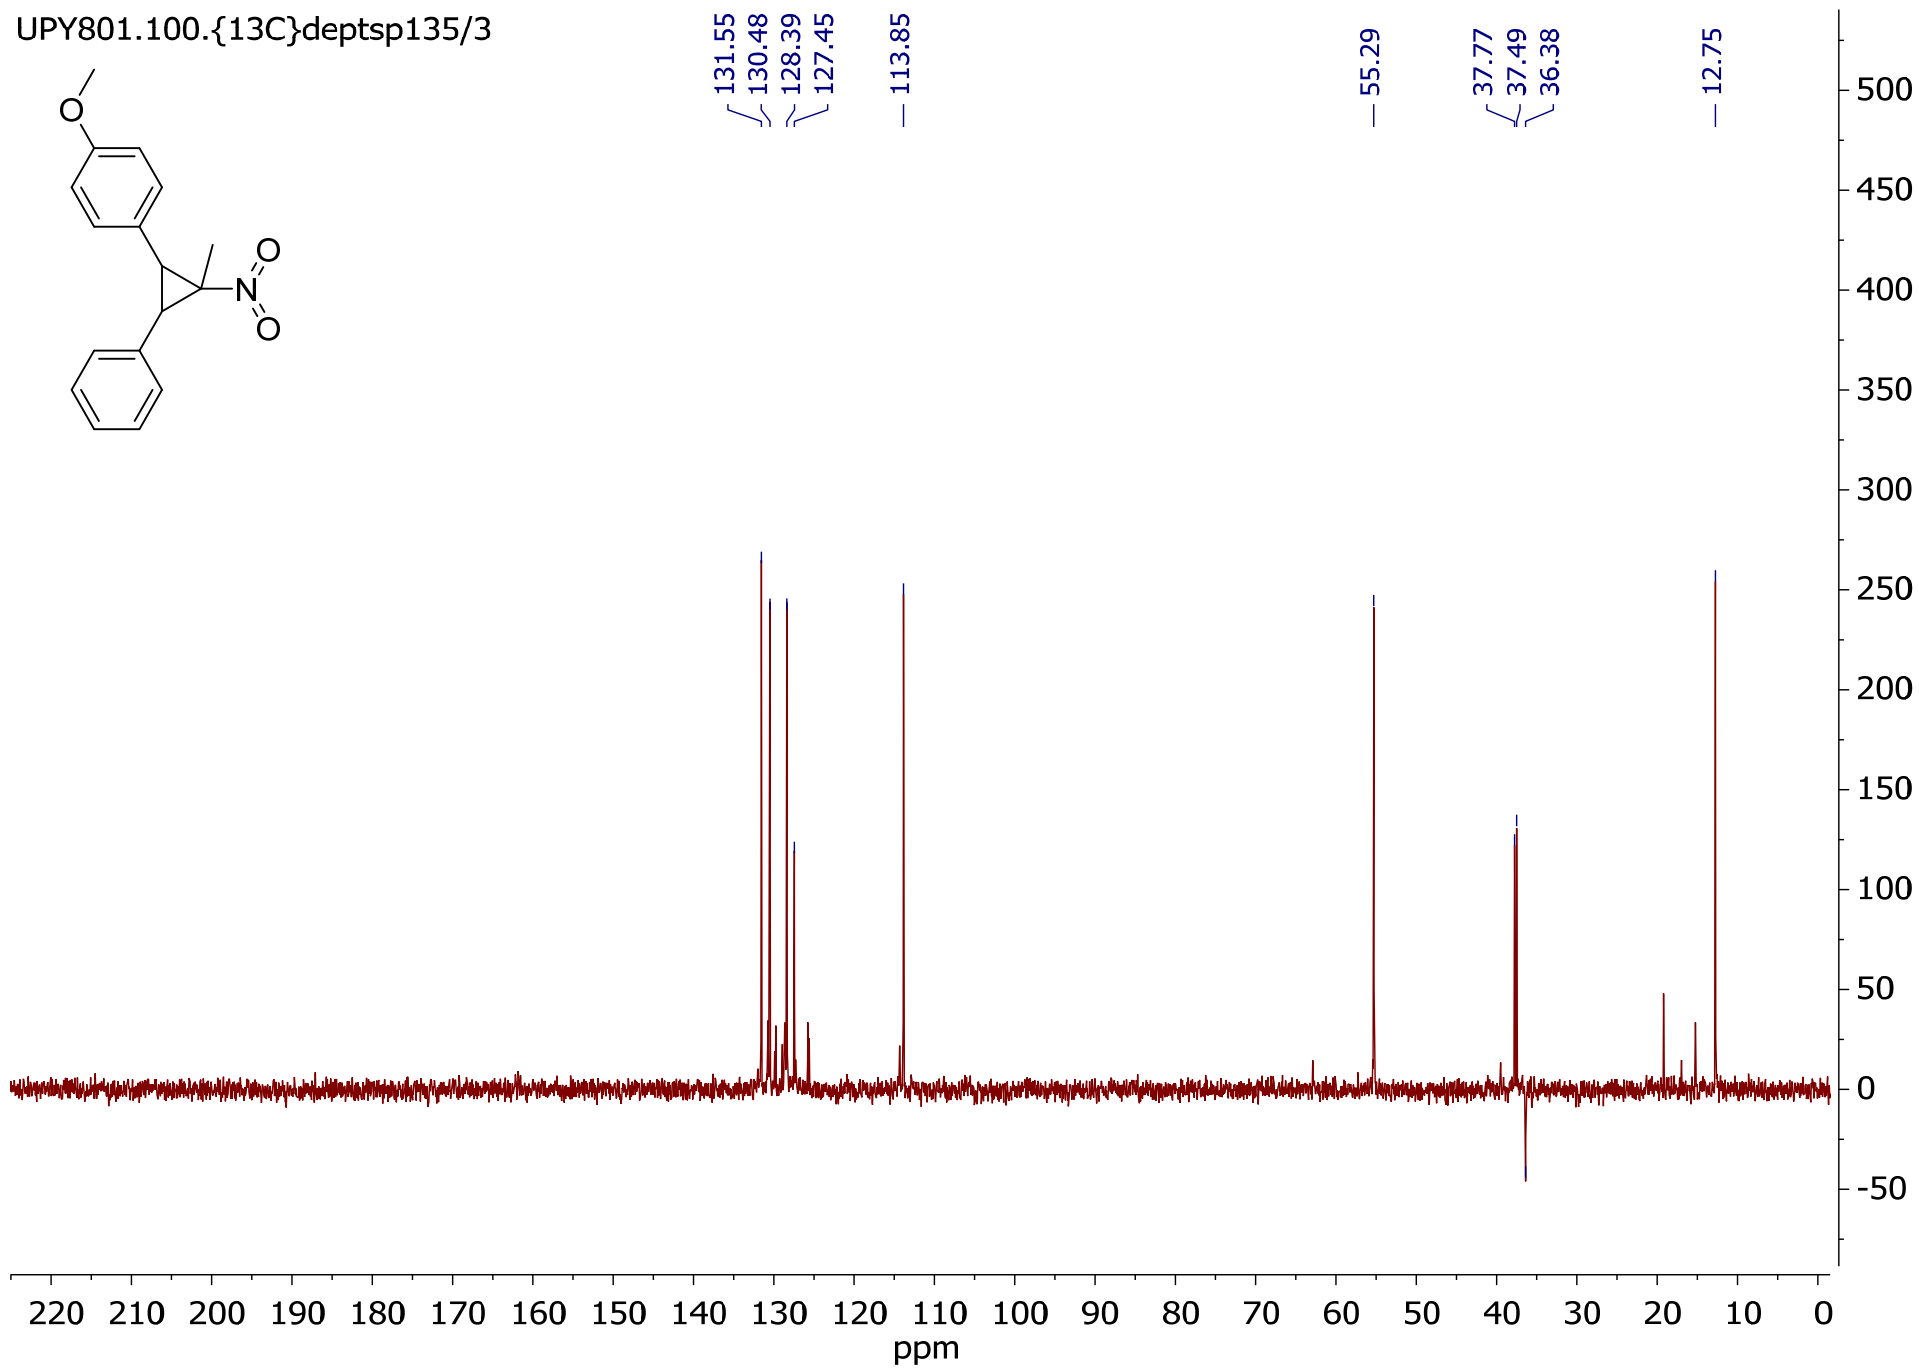

UPY813.200.{1H}/9  
/ILDTPY813.200

### NMR spectra of 12b

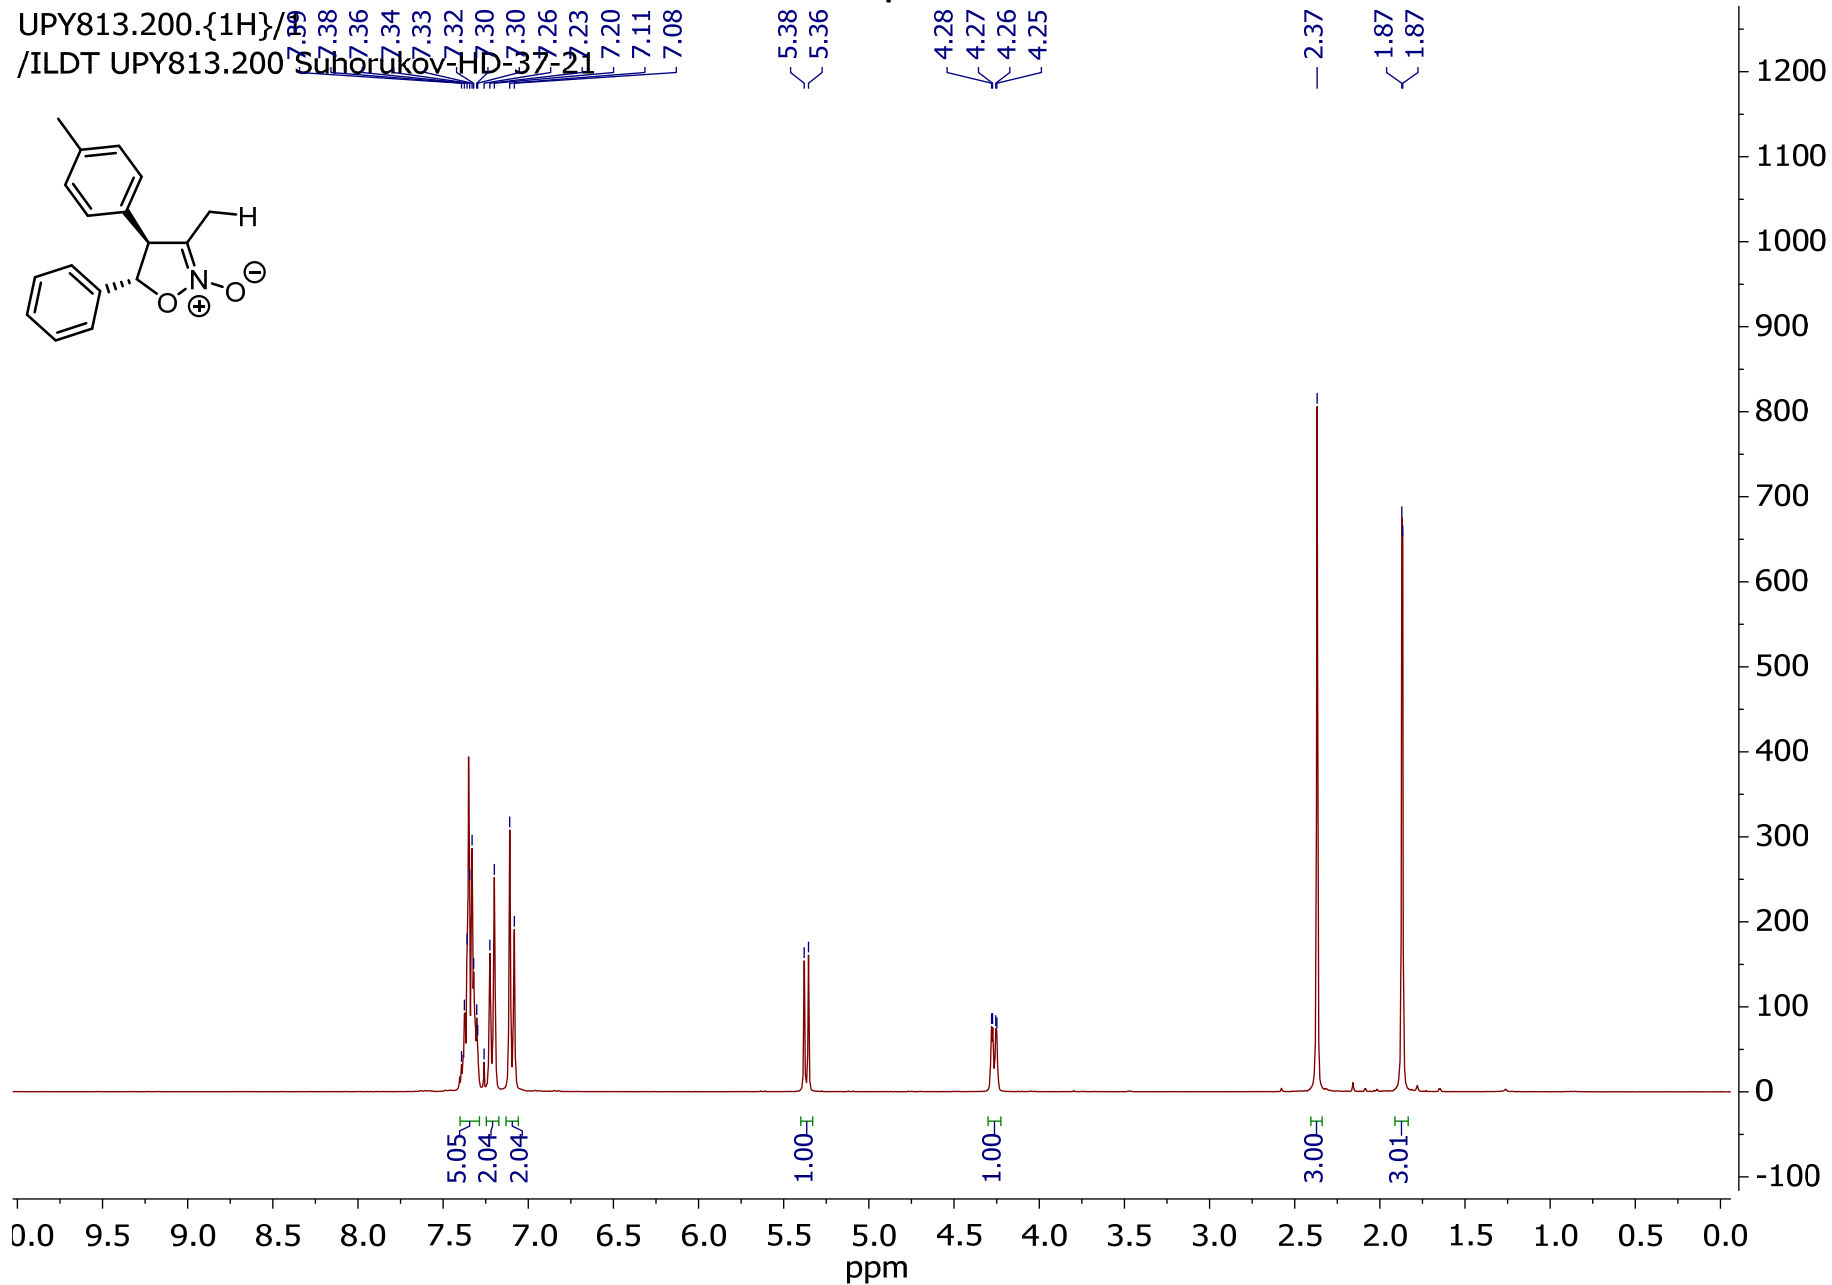

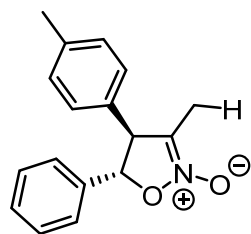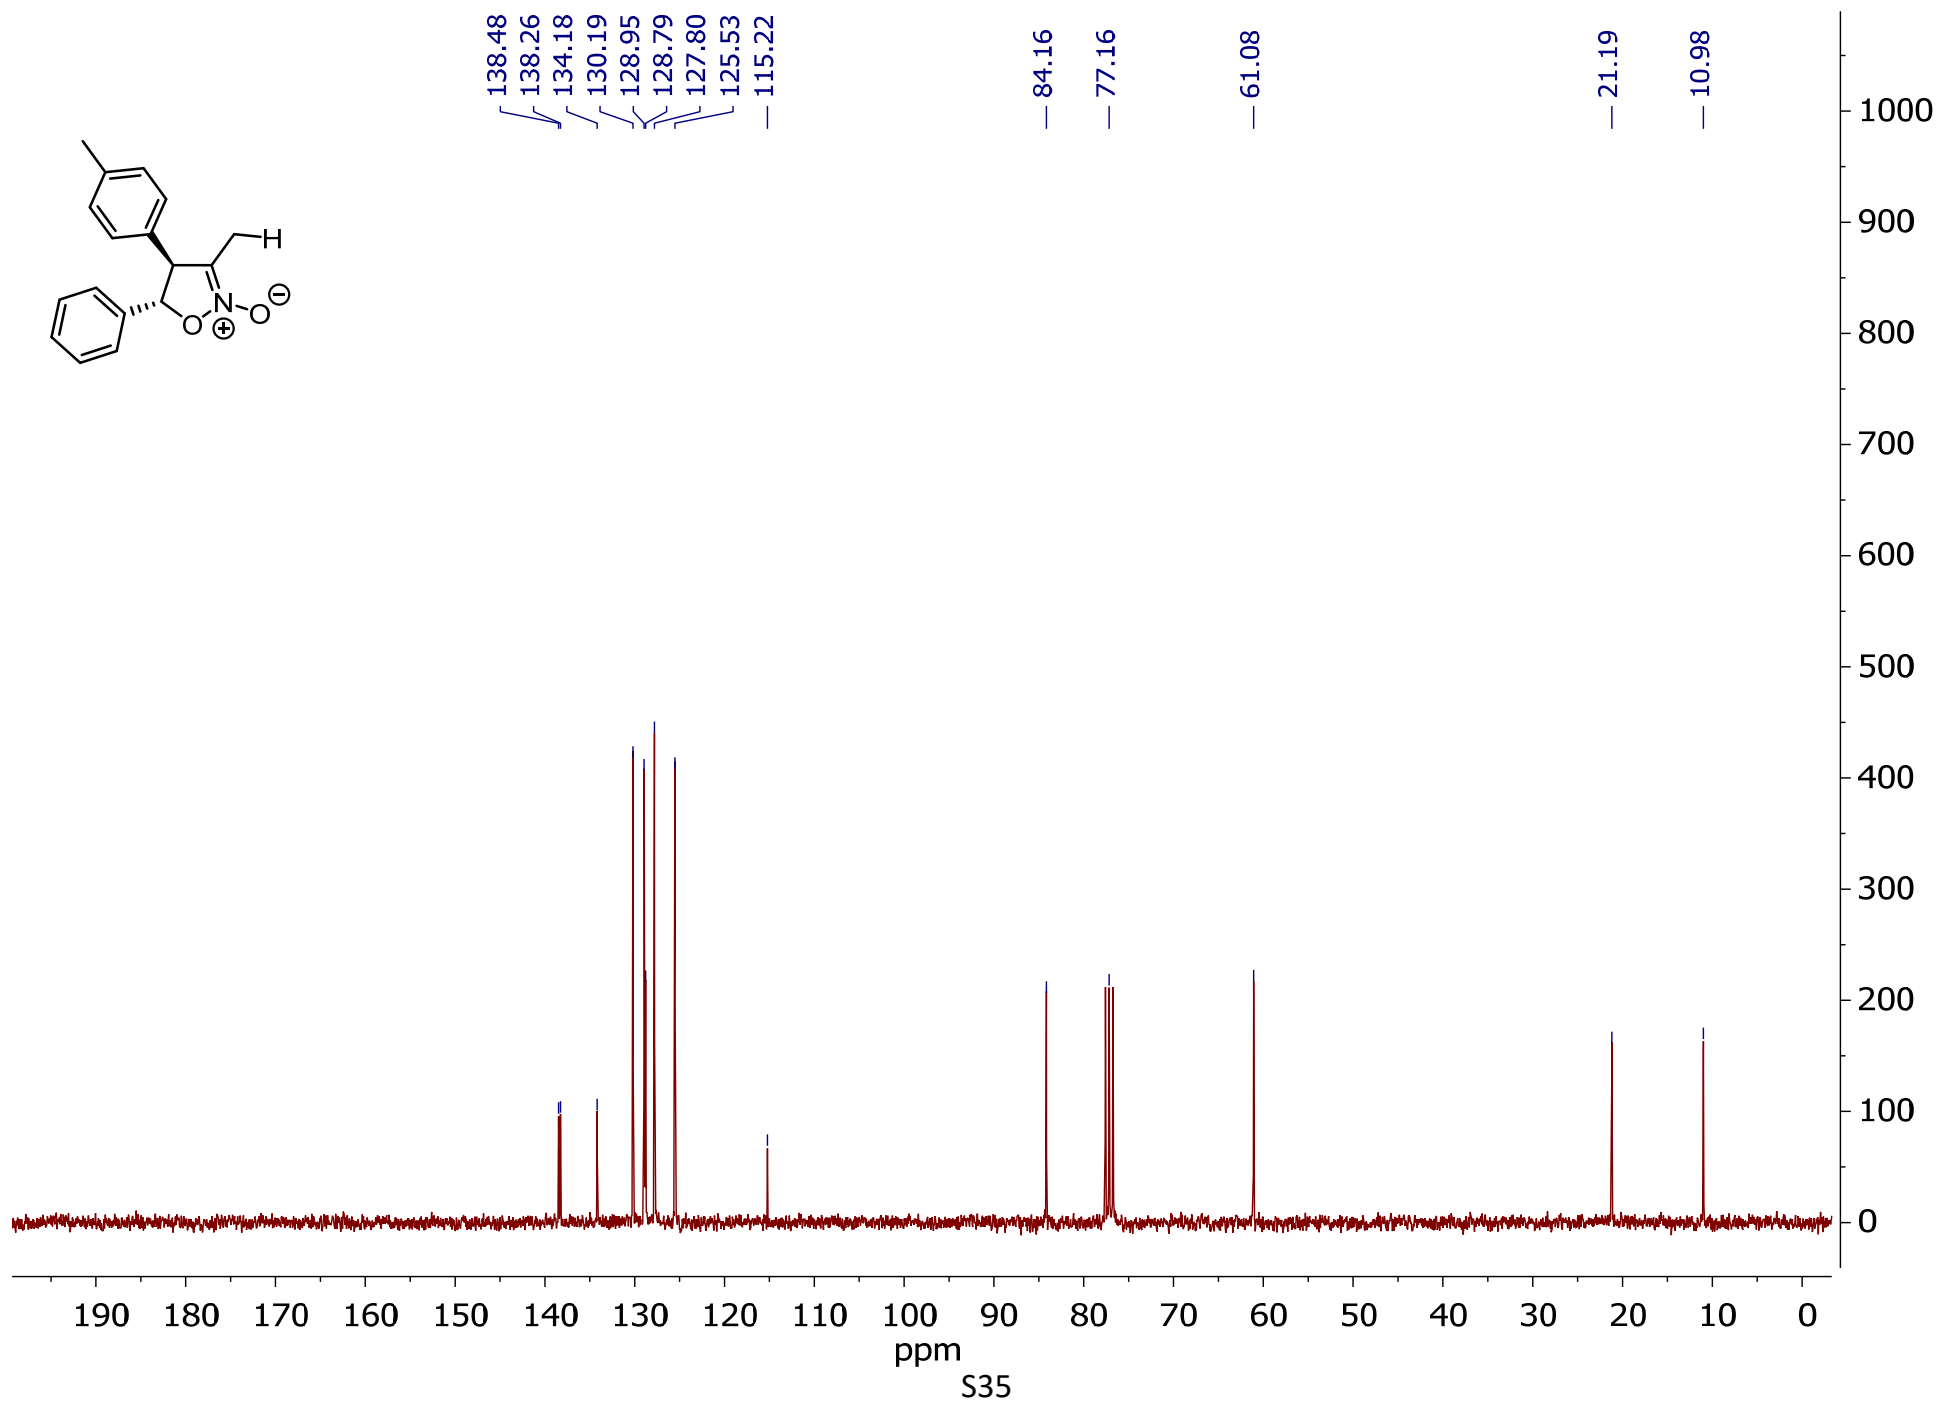

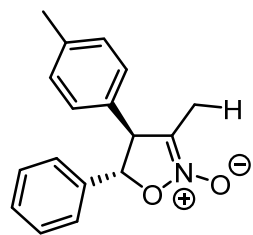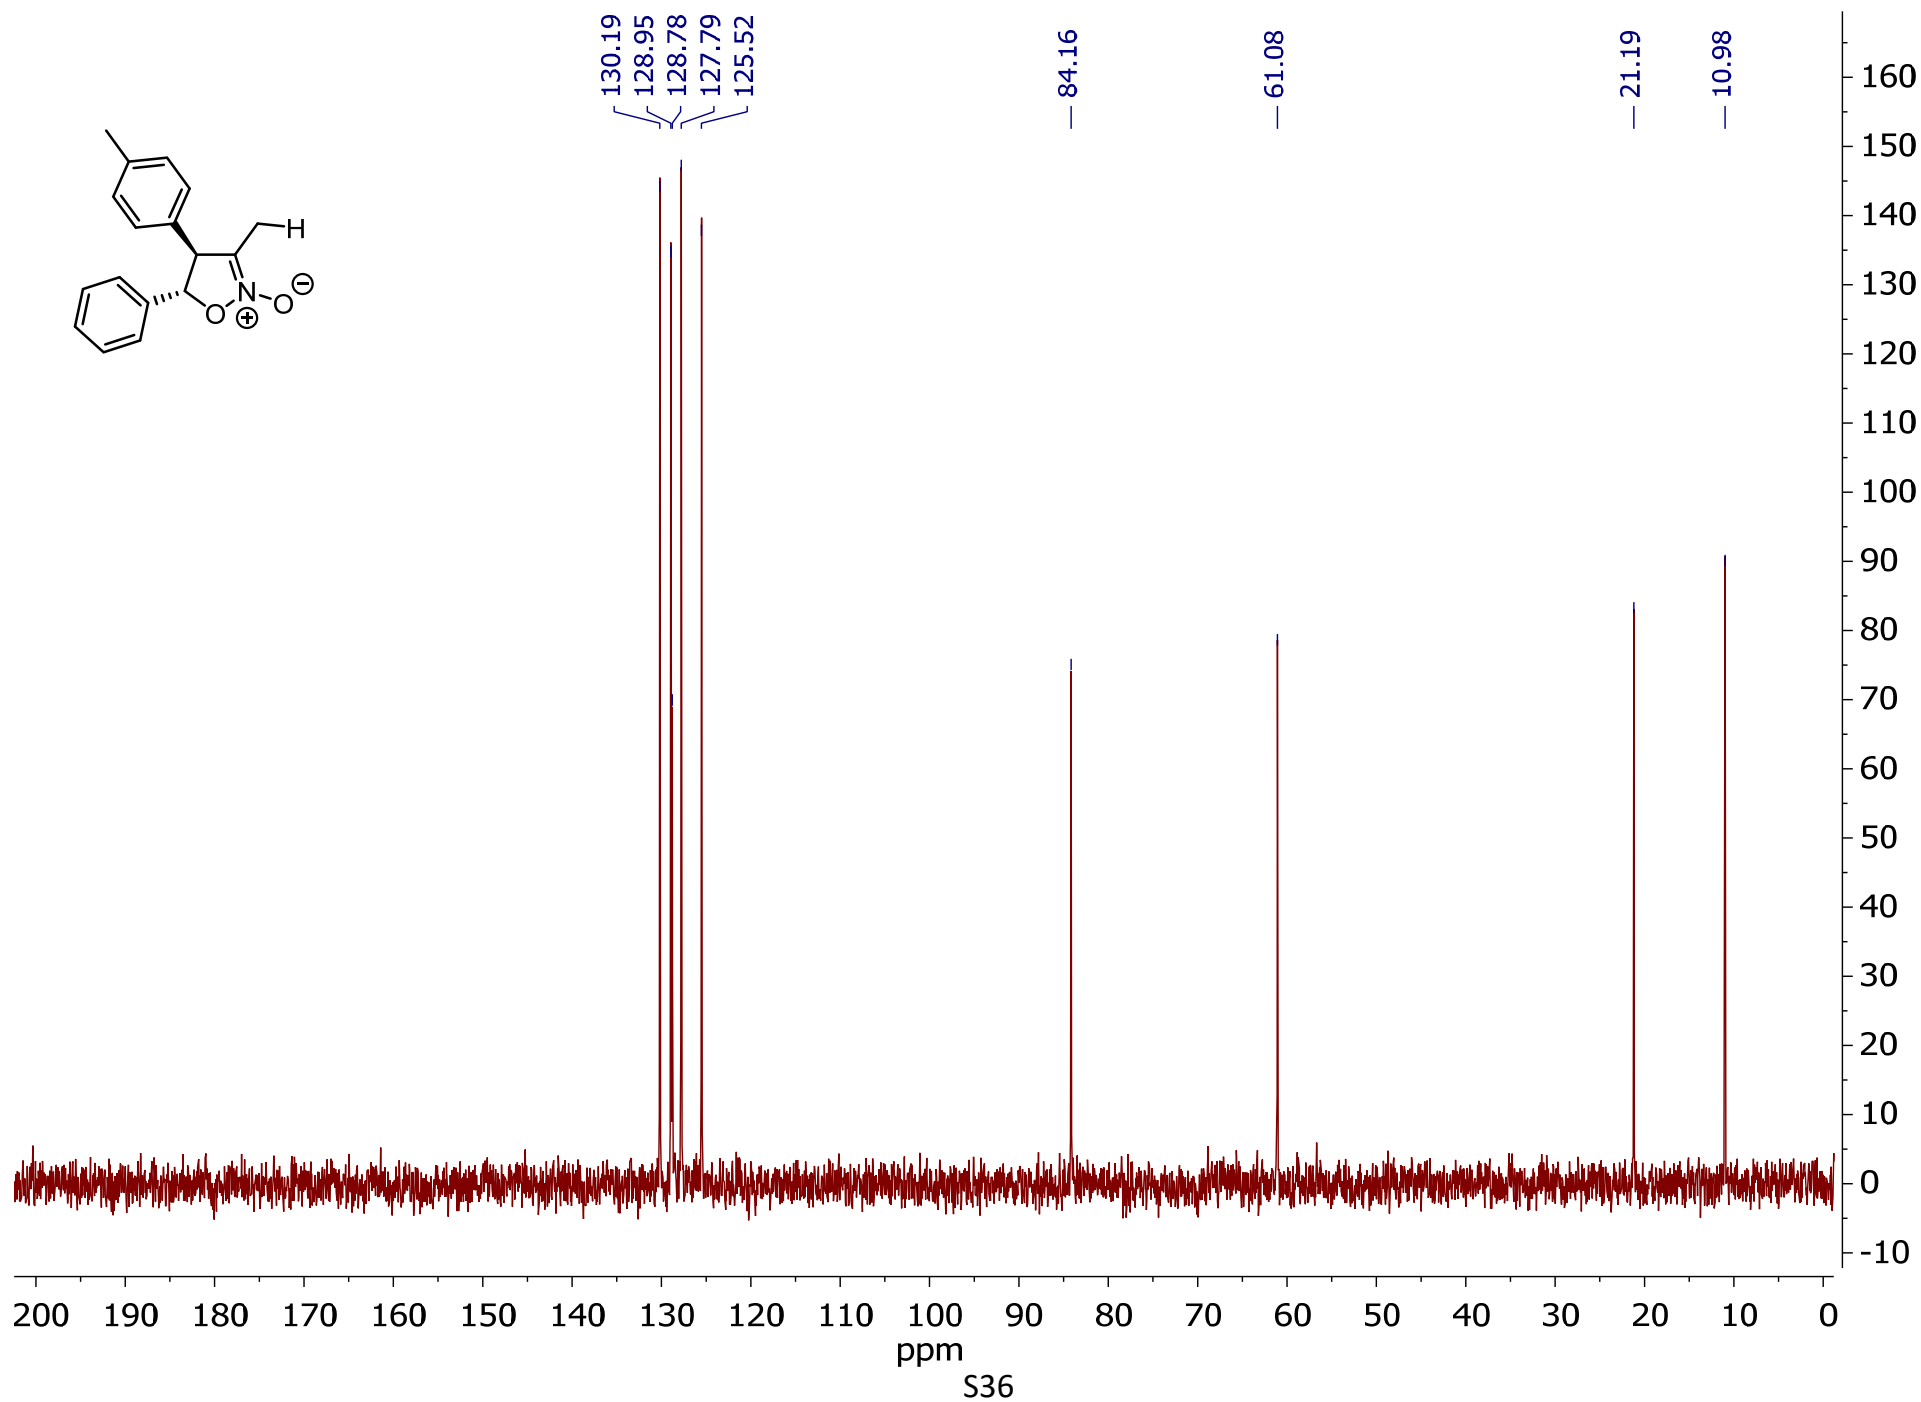

UPY814.100.{1H}/1  
/ILDY UPY814.100

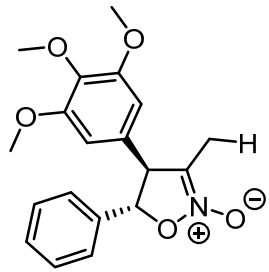

### NMR spectra of 12c

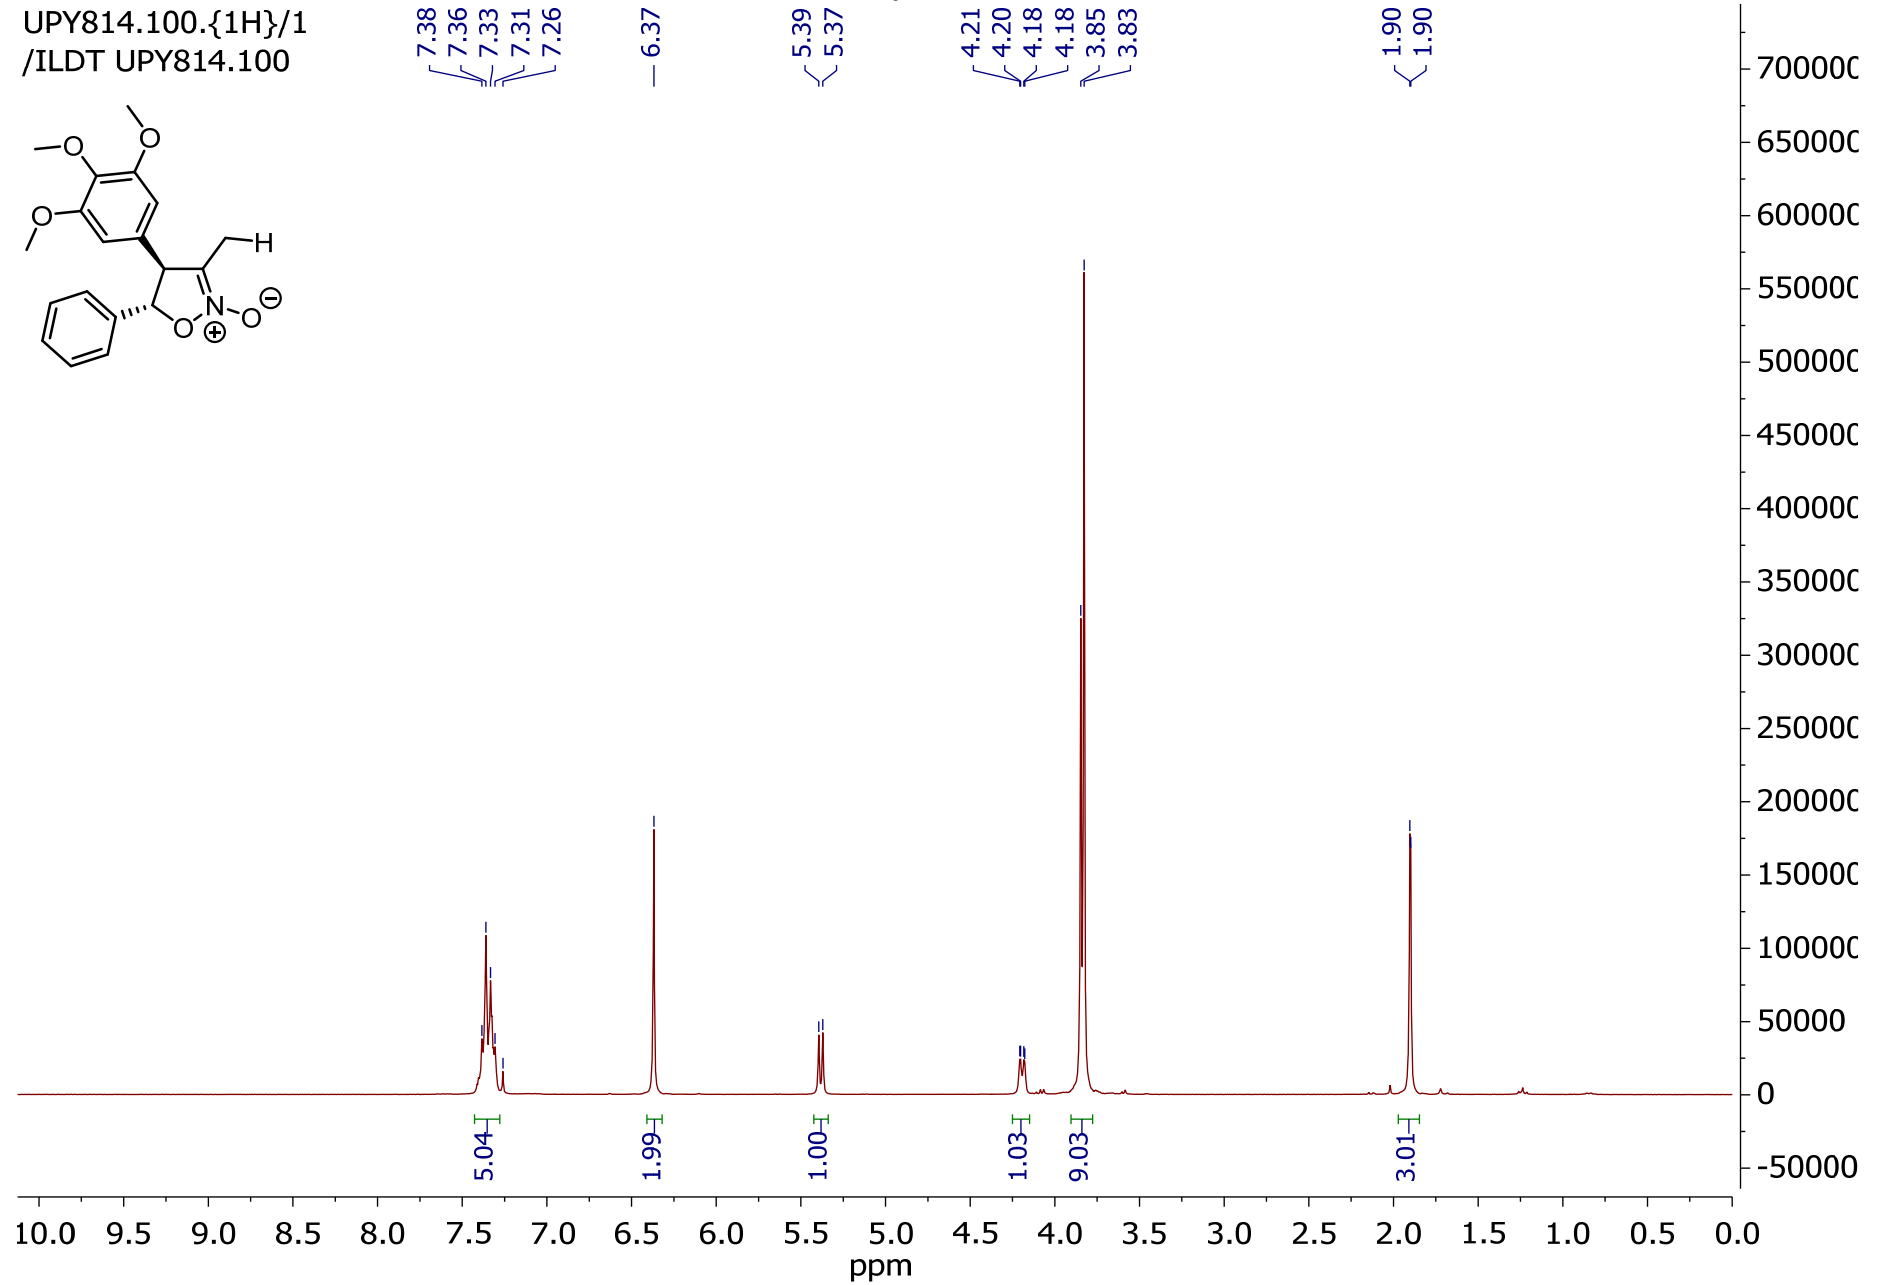

UPY814.100.{13C}/2  
/ILD T UPY814.100

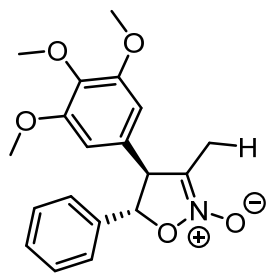

— 154.06

138.31

138.10

132.87

129.02

128.91

125.52

— 115.04

— 104.68

— 83.94

— 77.16

61.84

60.93

56.37

— 11.09

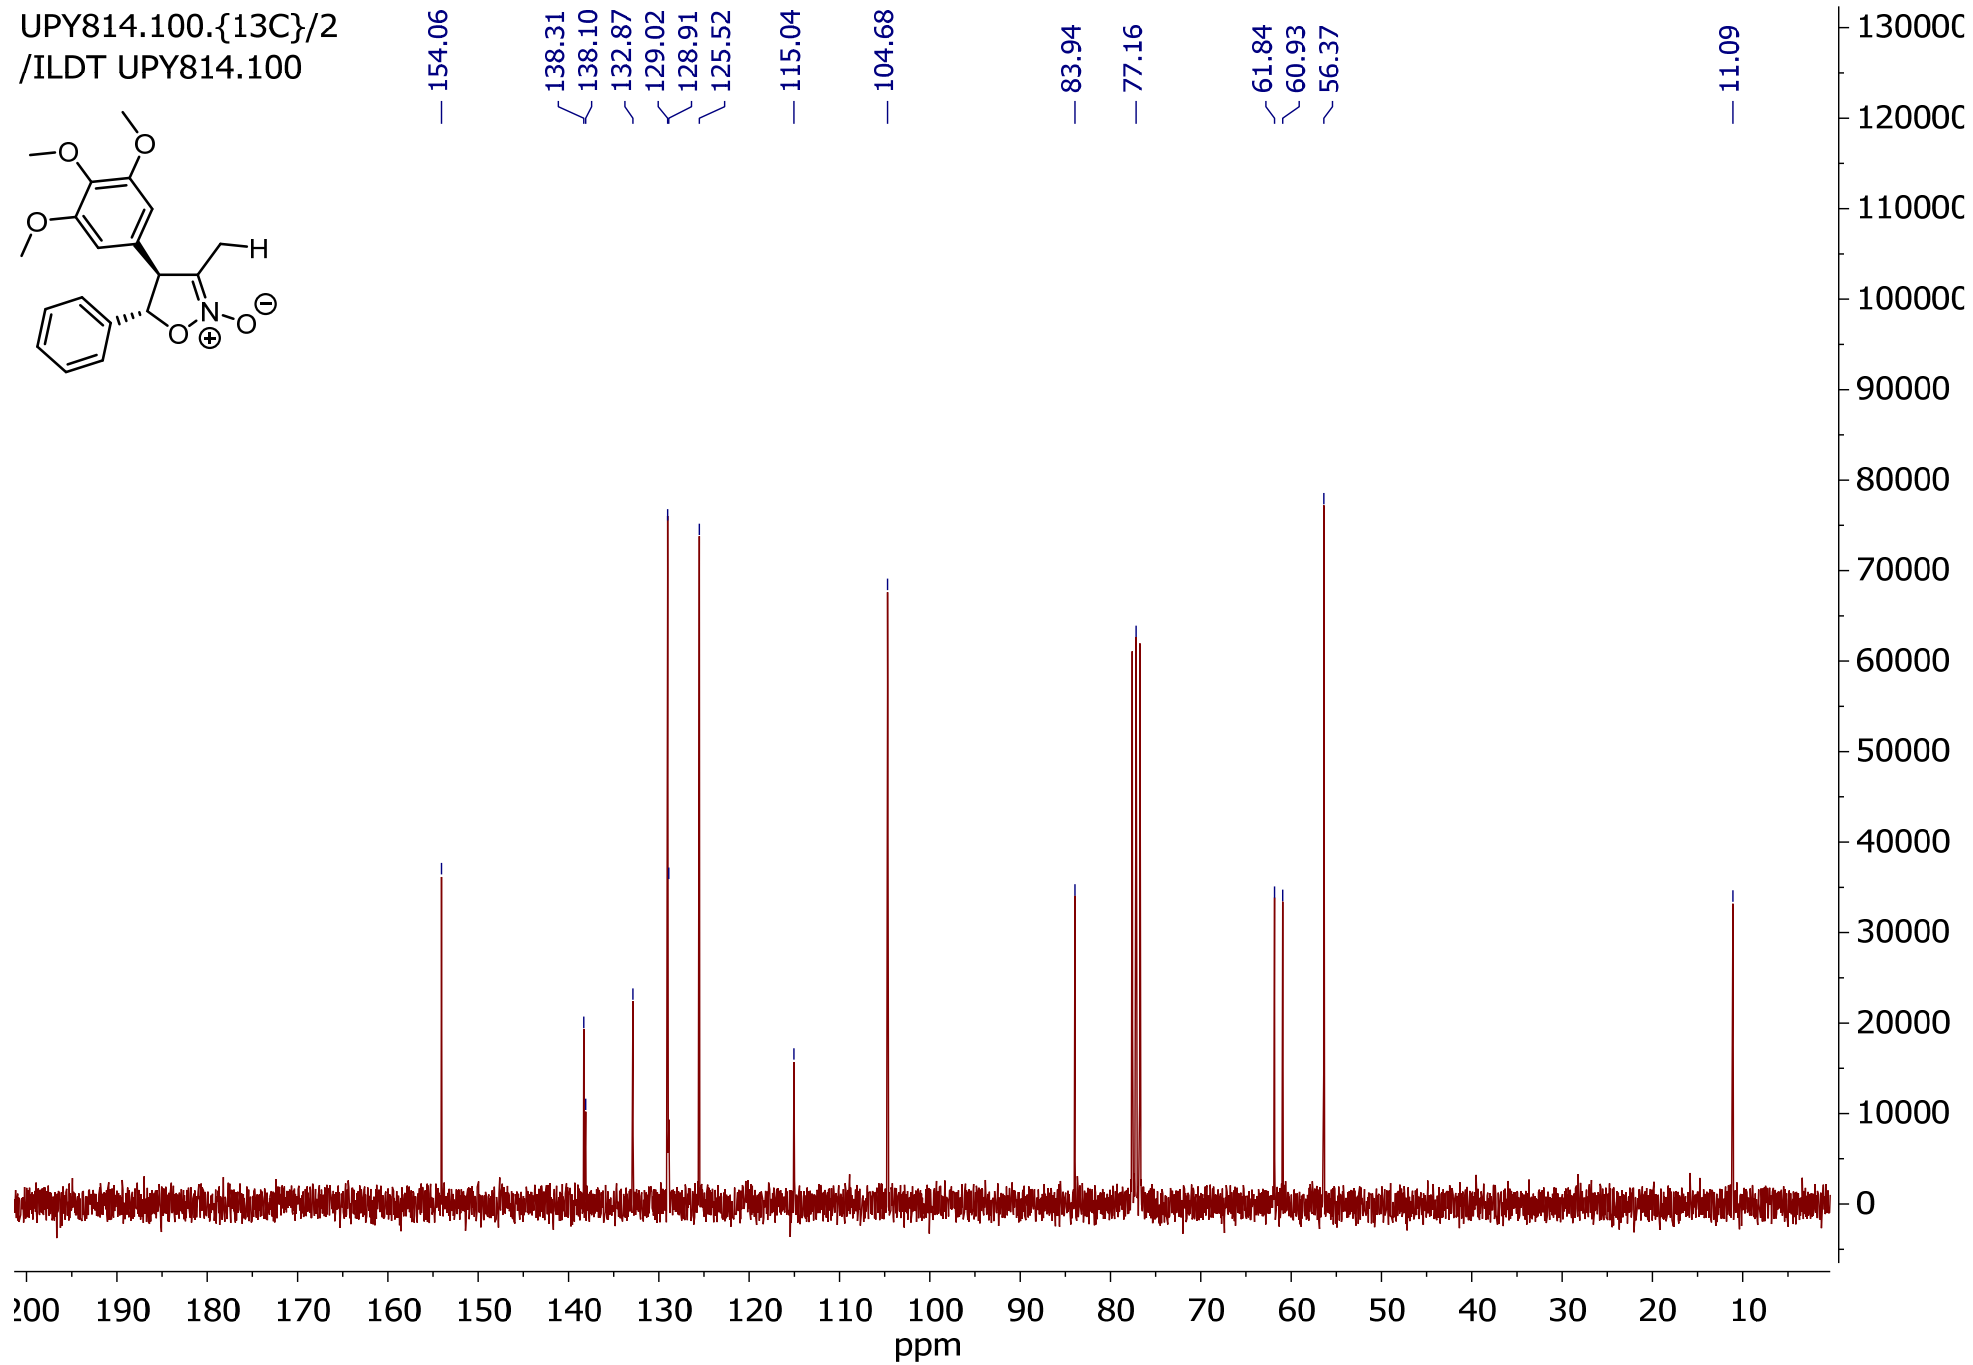

S38

UPY814.100.{13C}deptsp135/3  
/ILD T UPY814.100

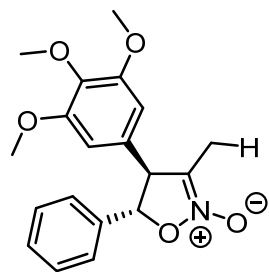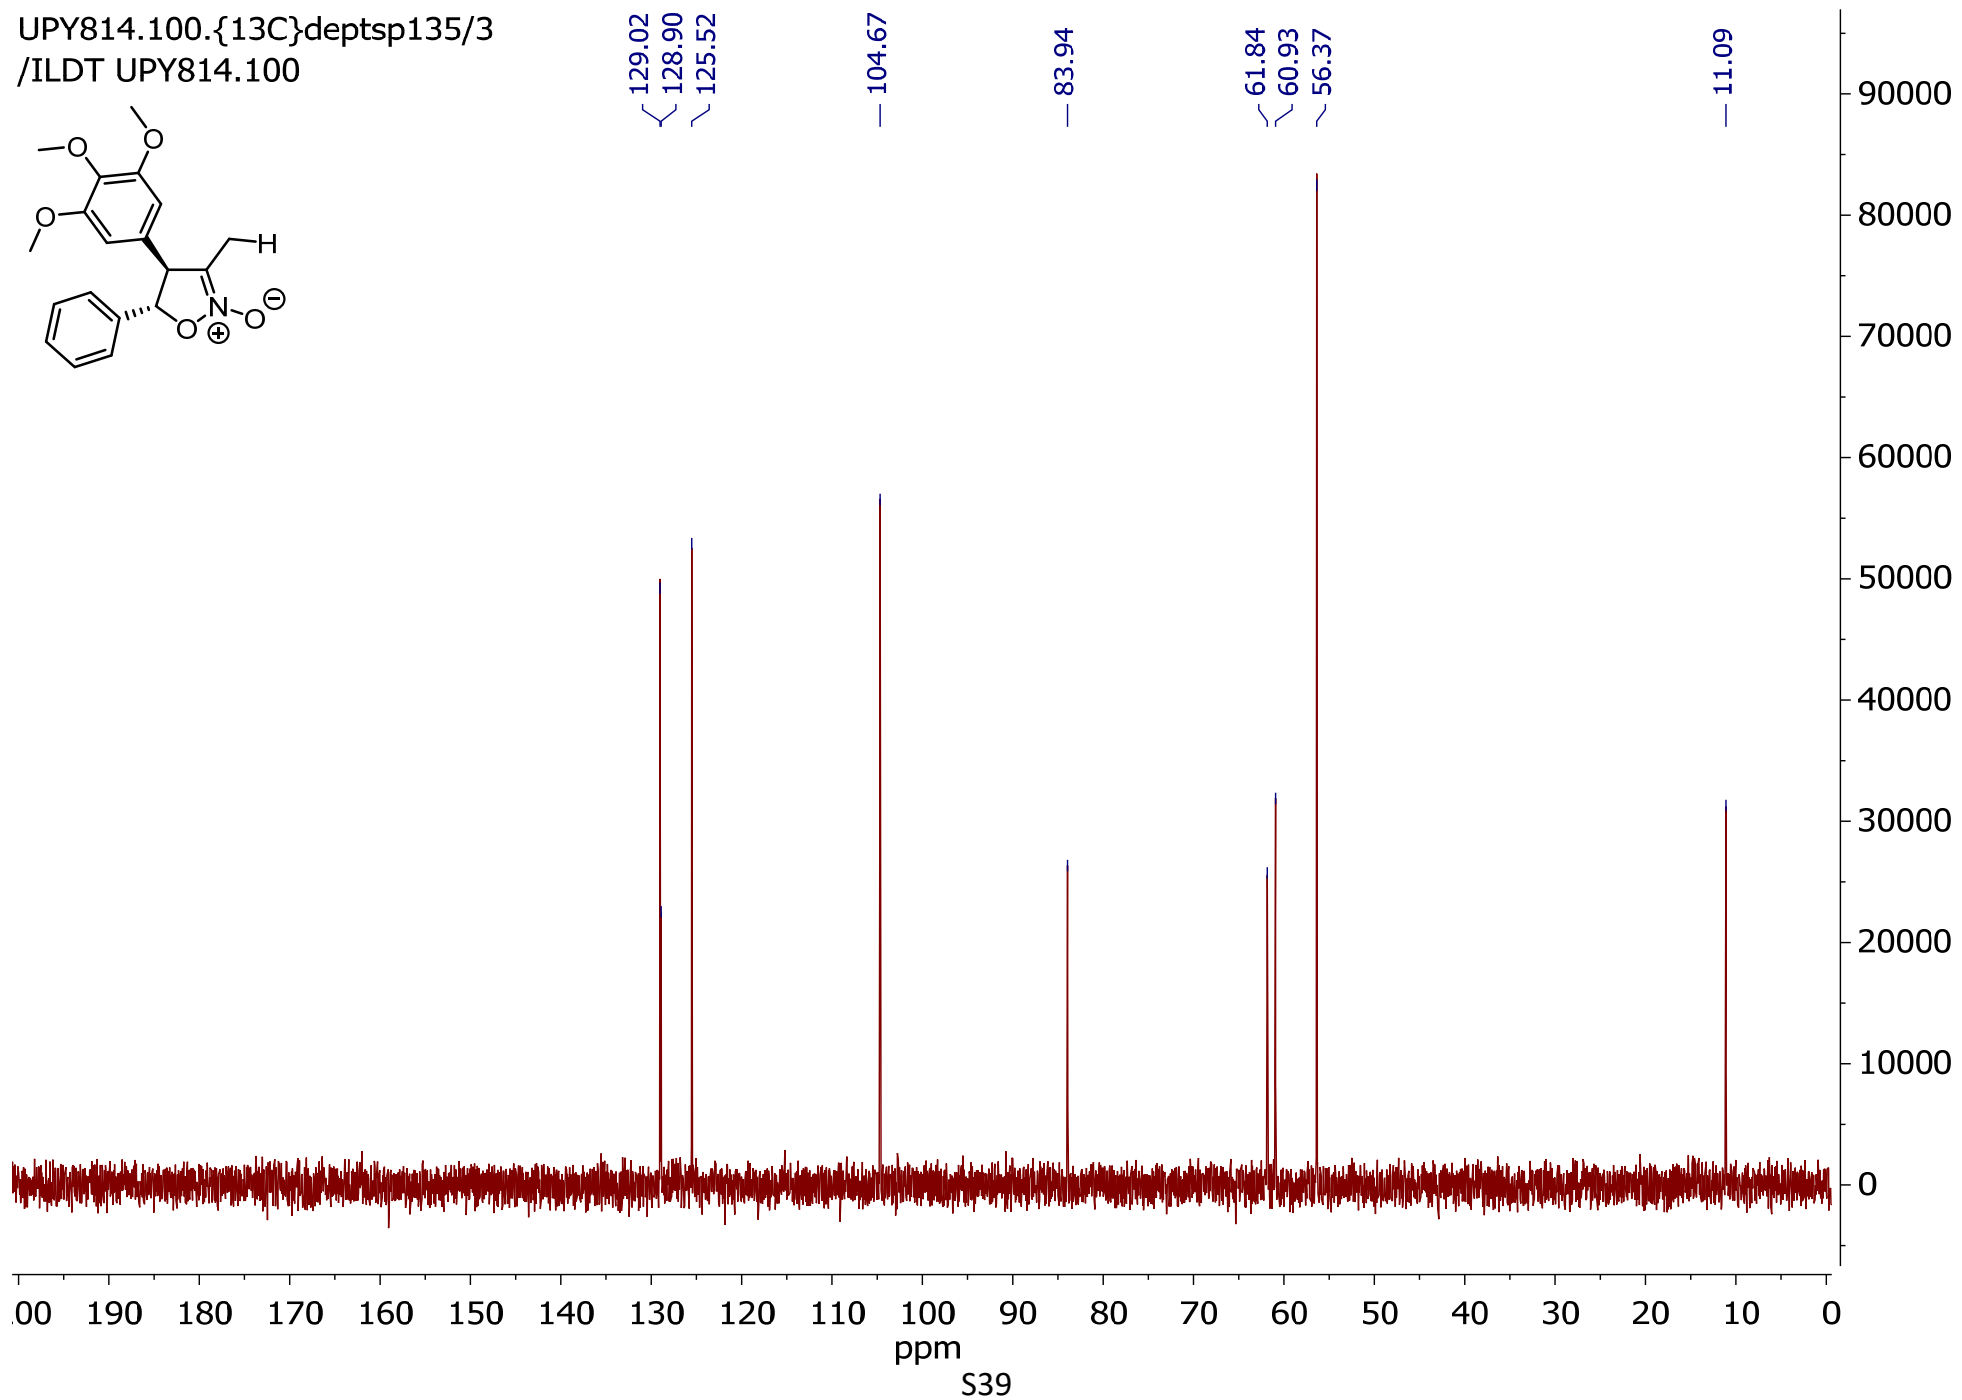

# NMR spectra of 12d

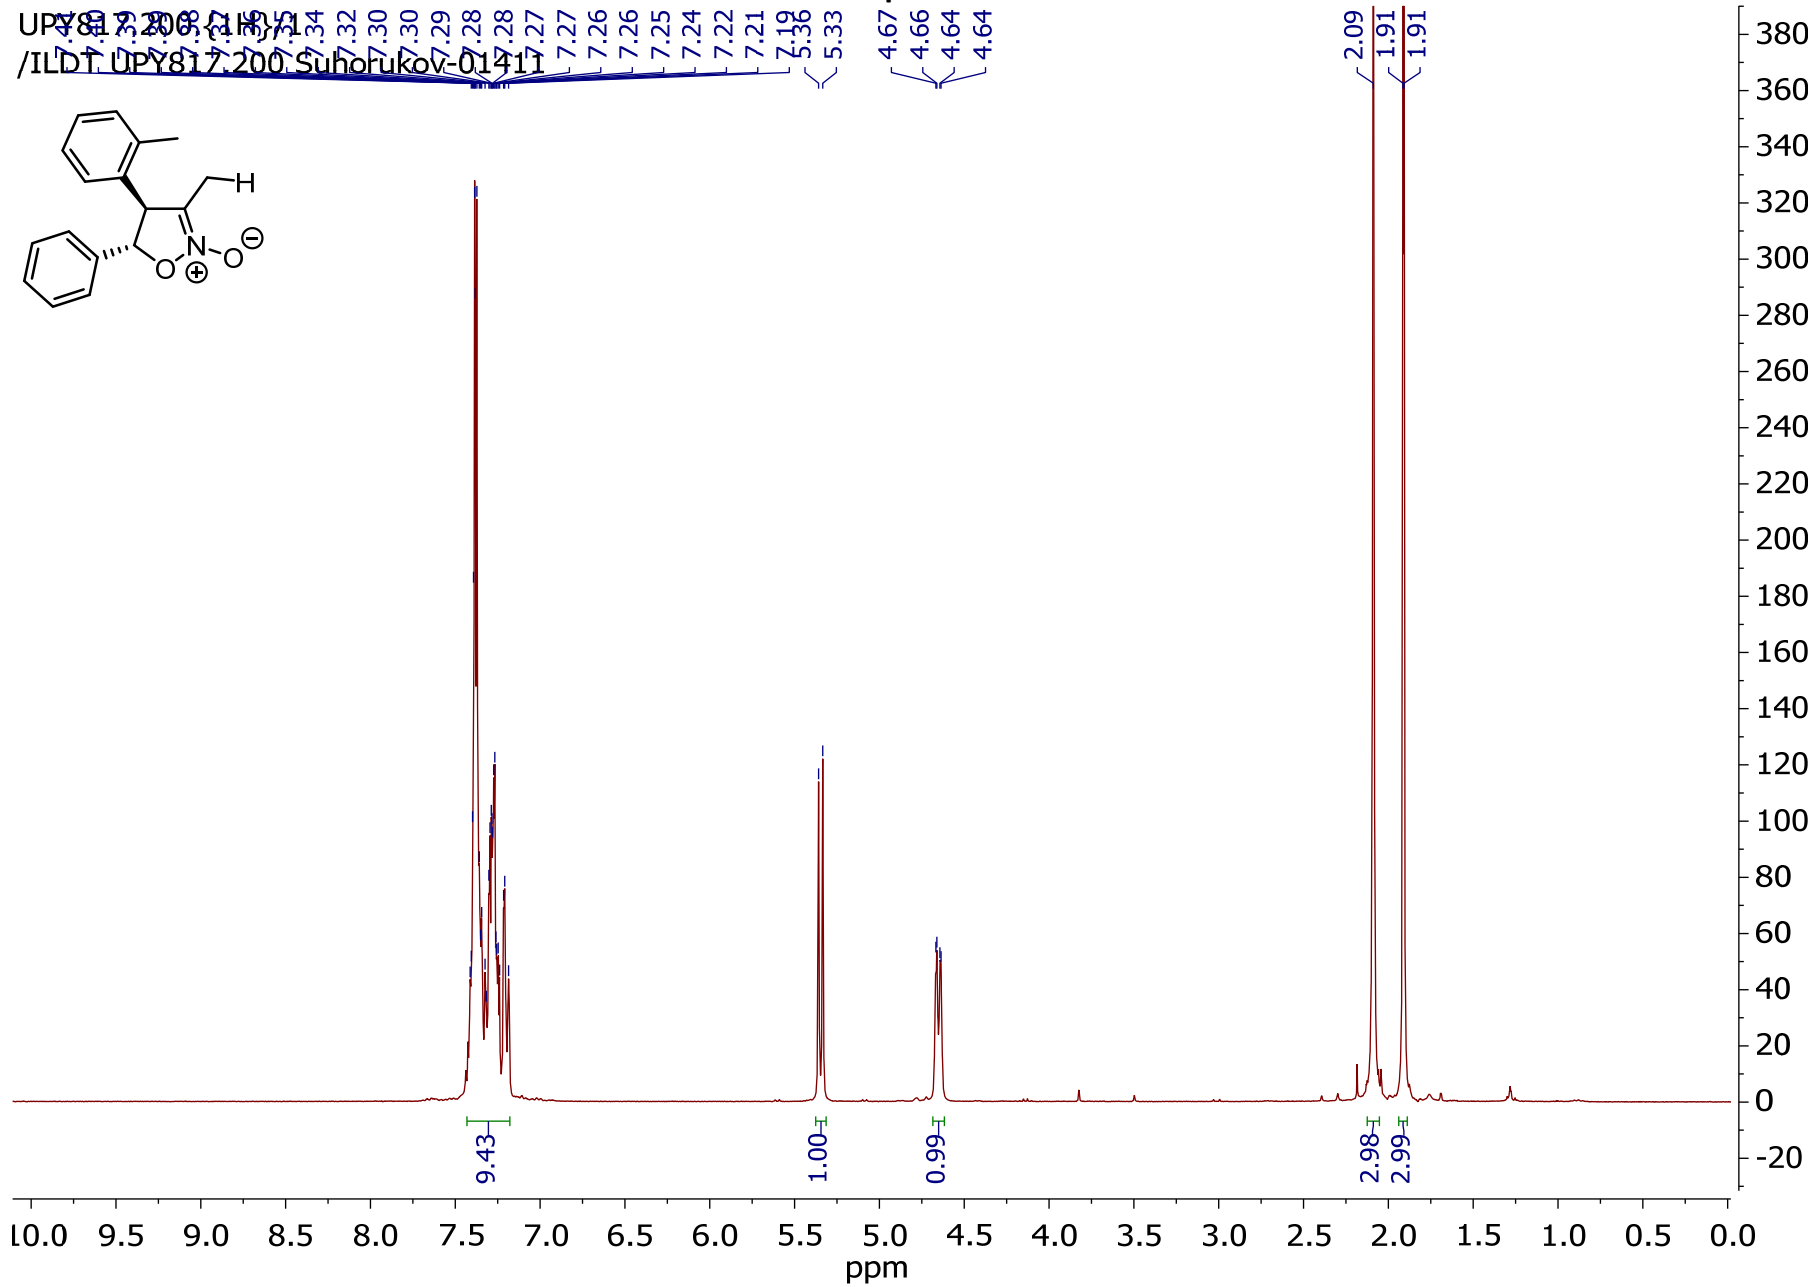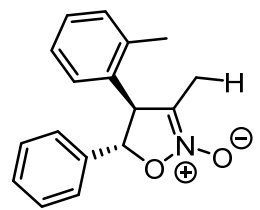



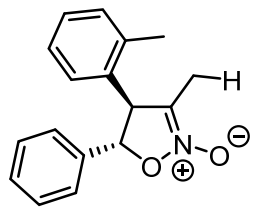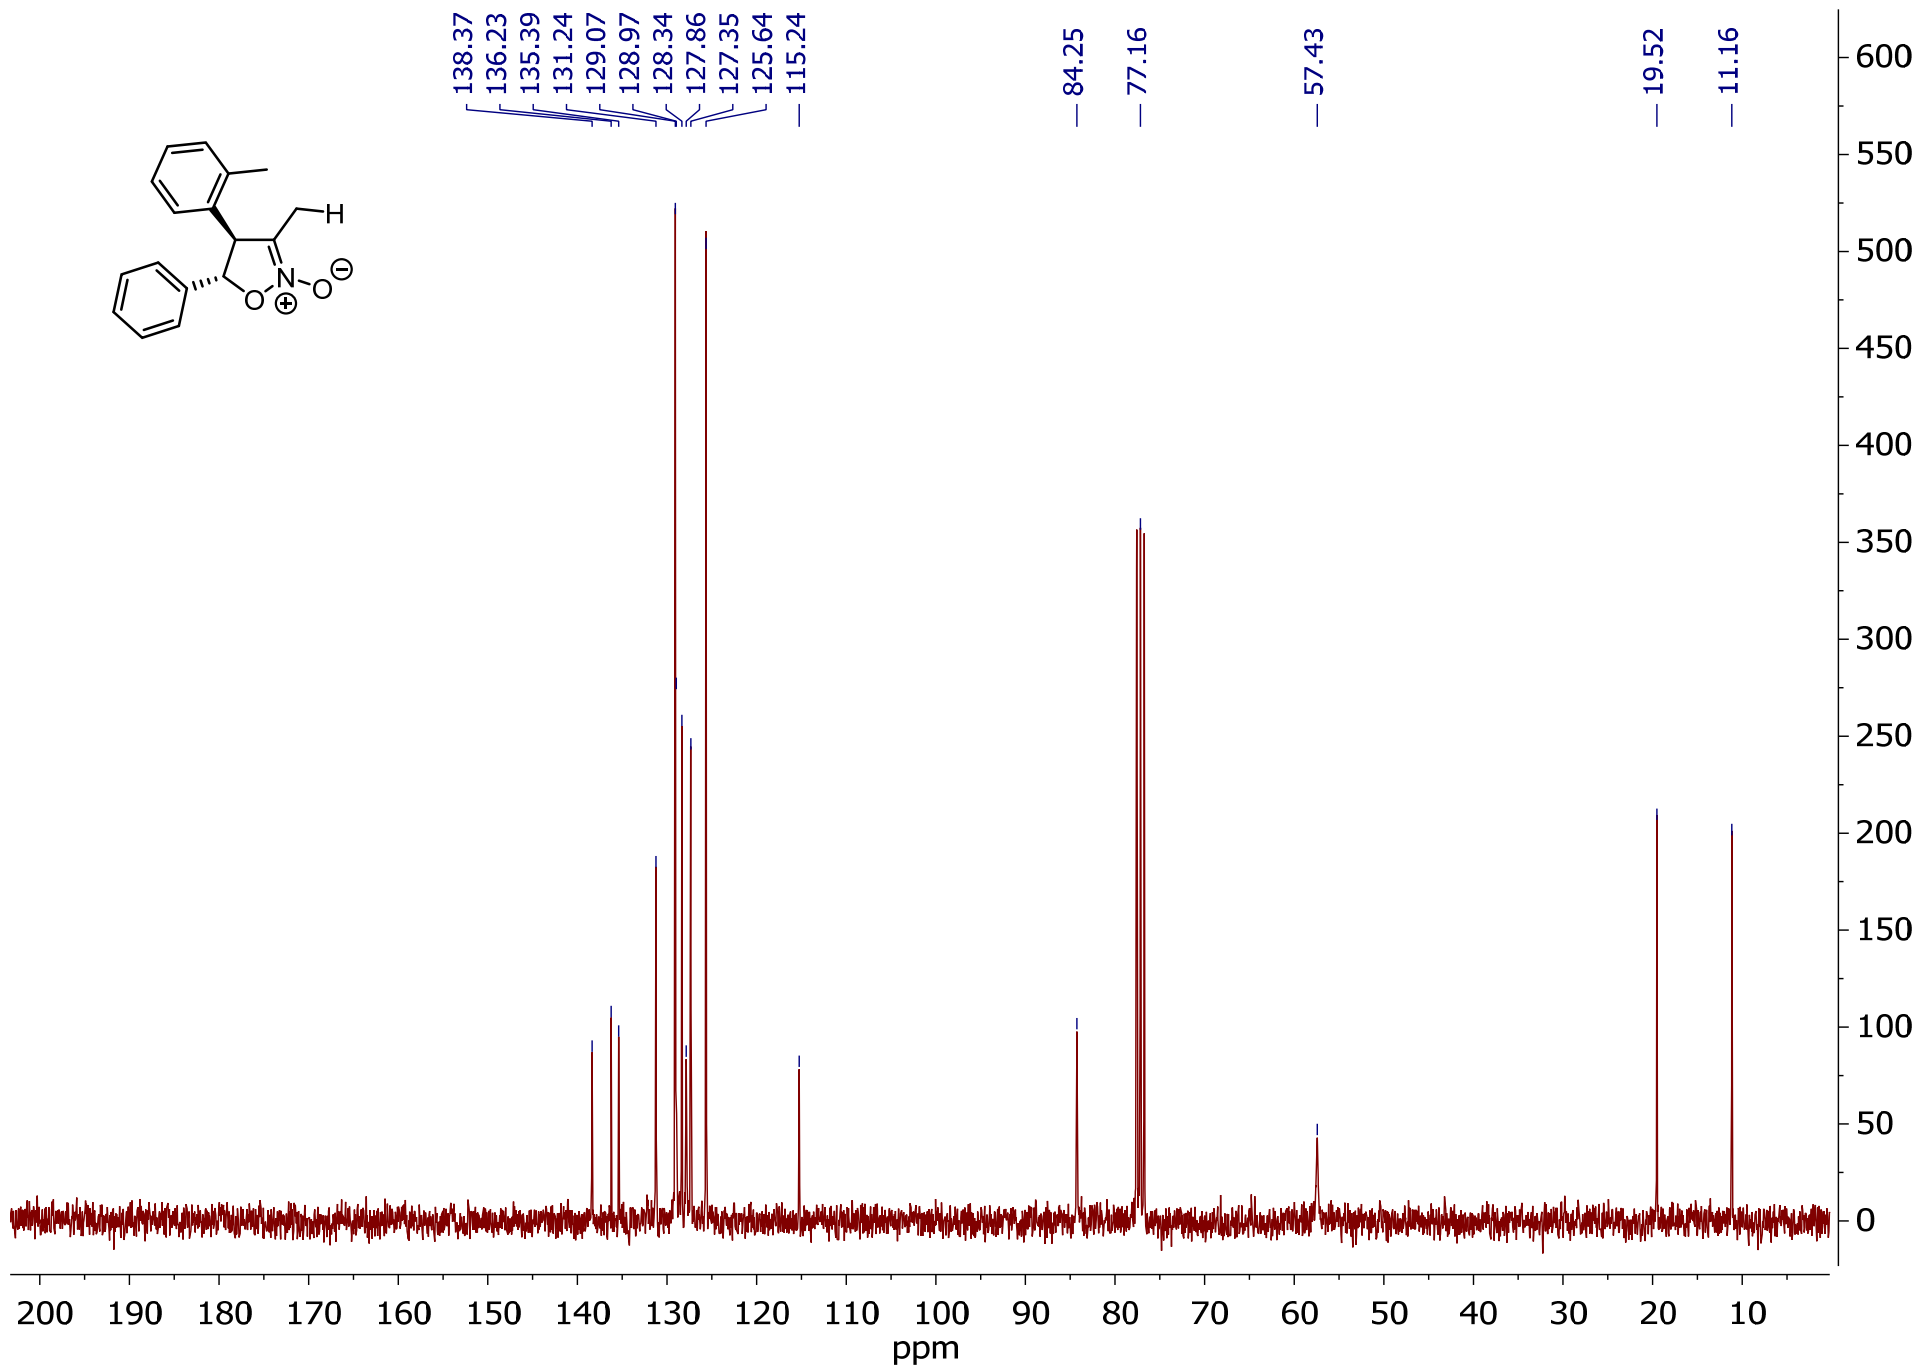

S41

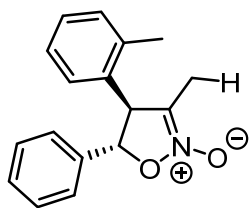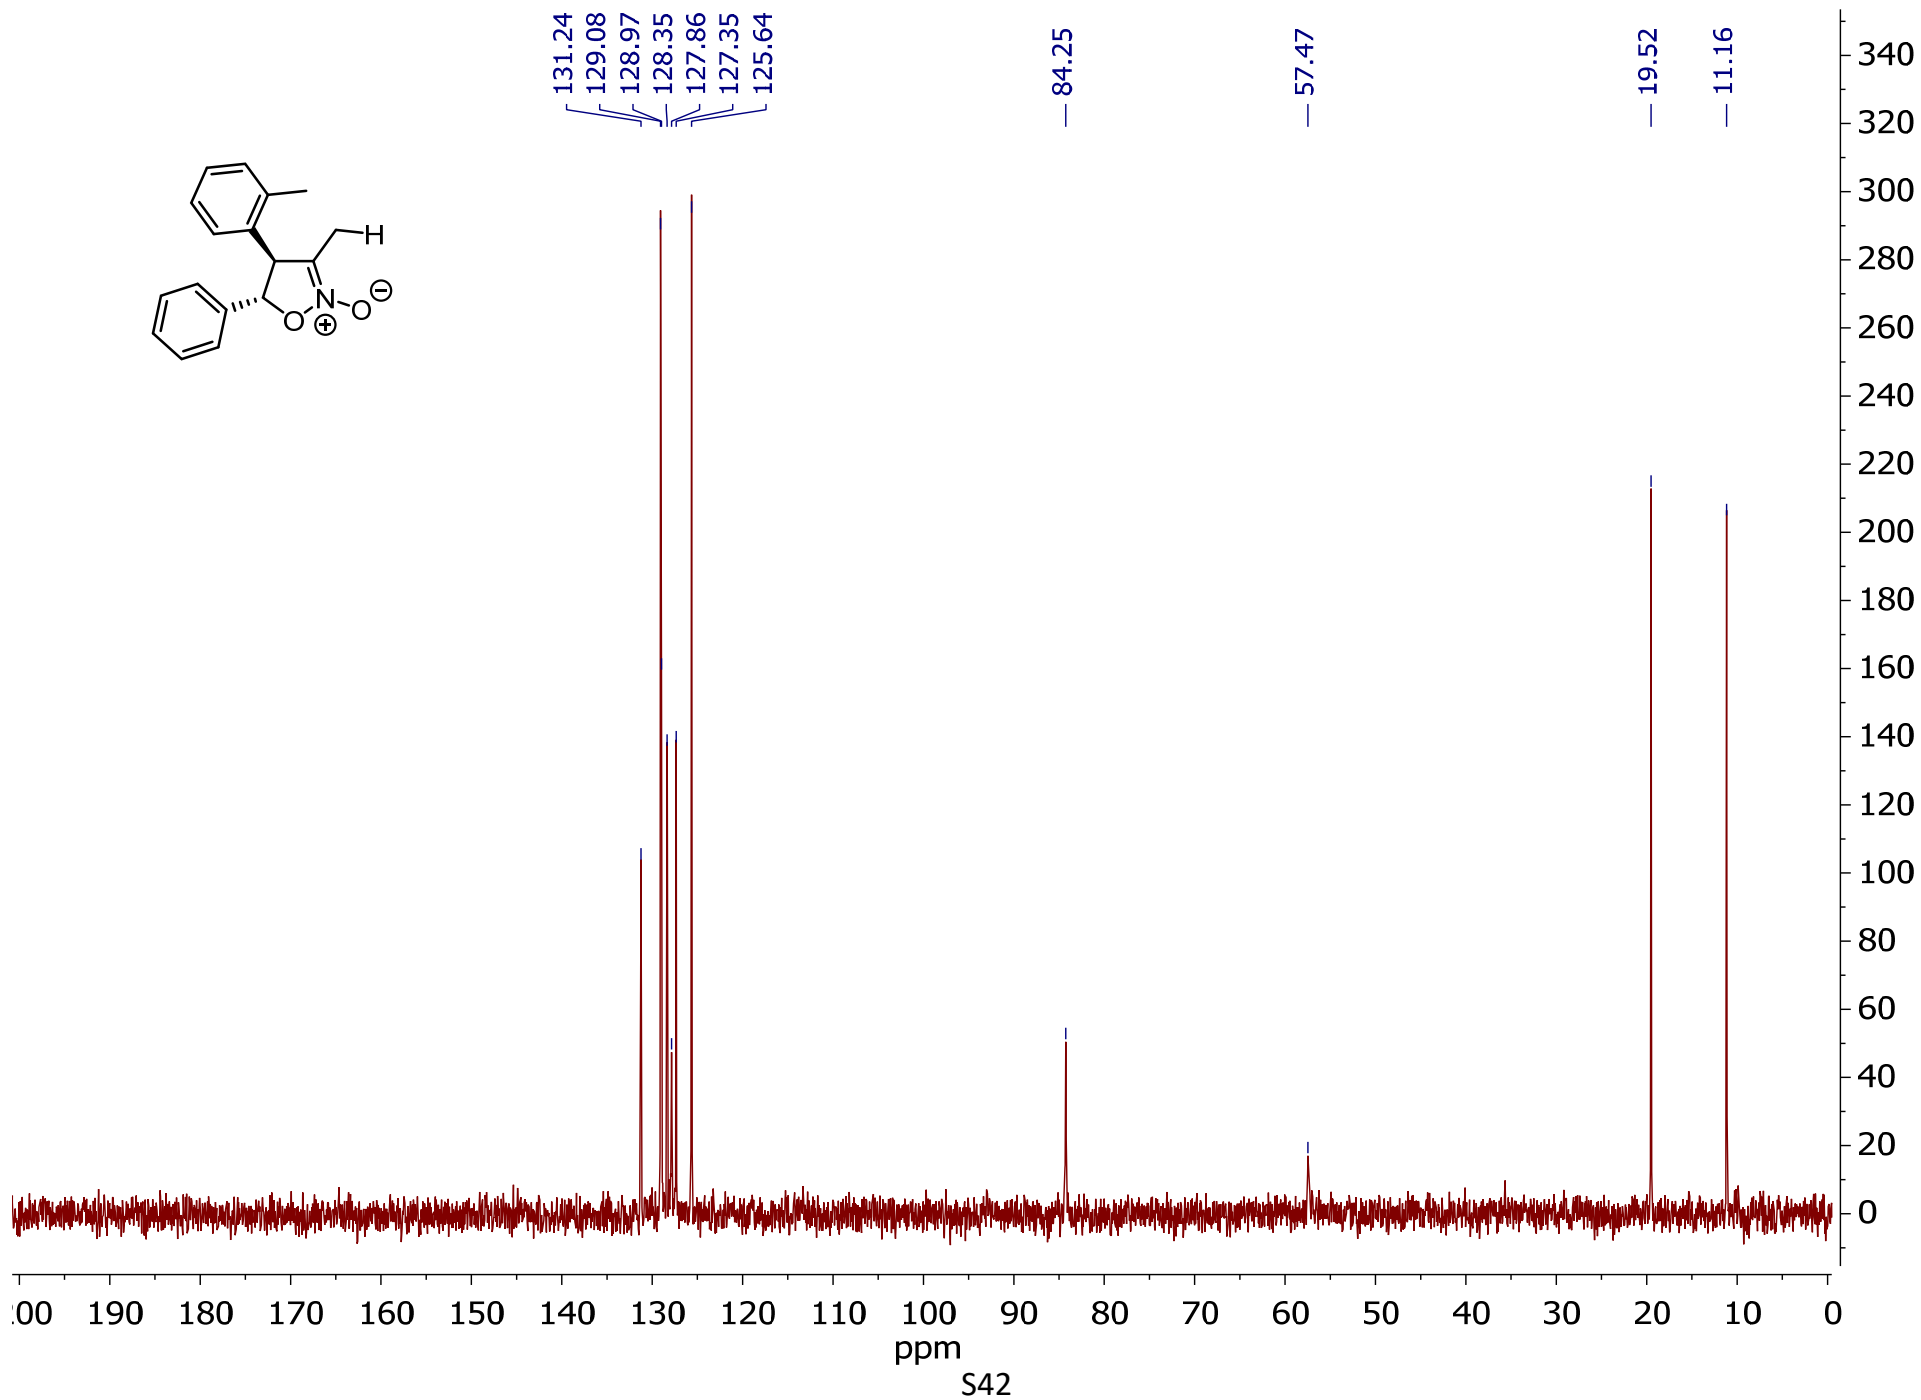

UPY838.100.{1H}/1  
/ILDY UPY838.100

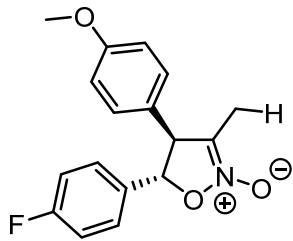

### NMR spectra of 12e

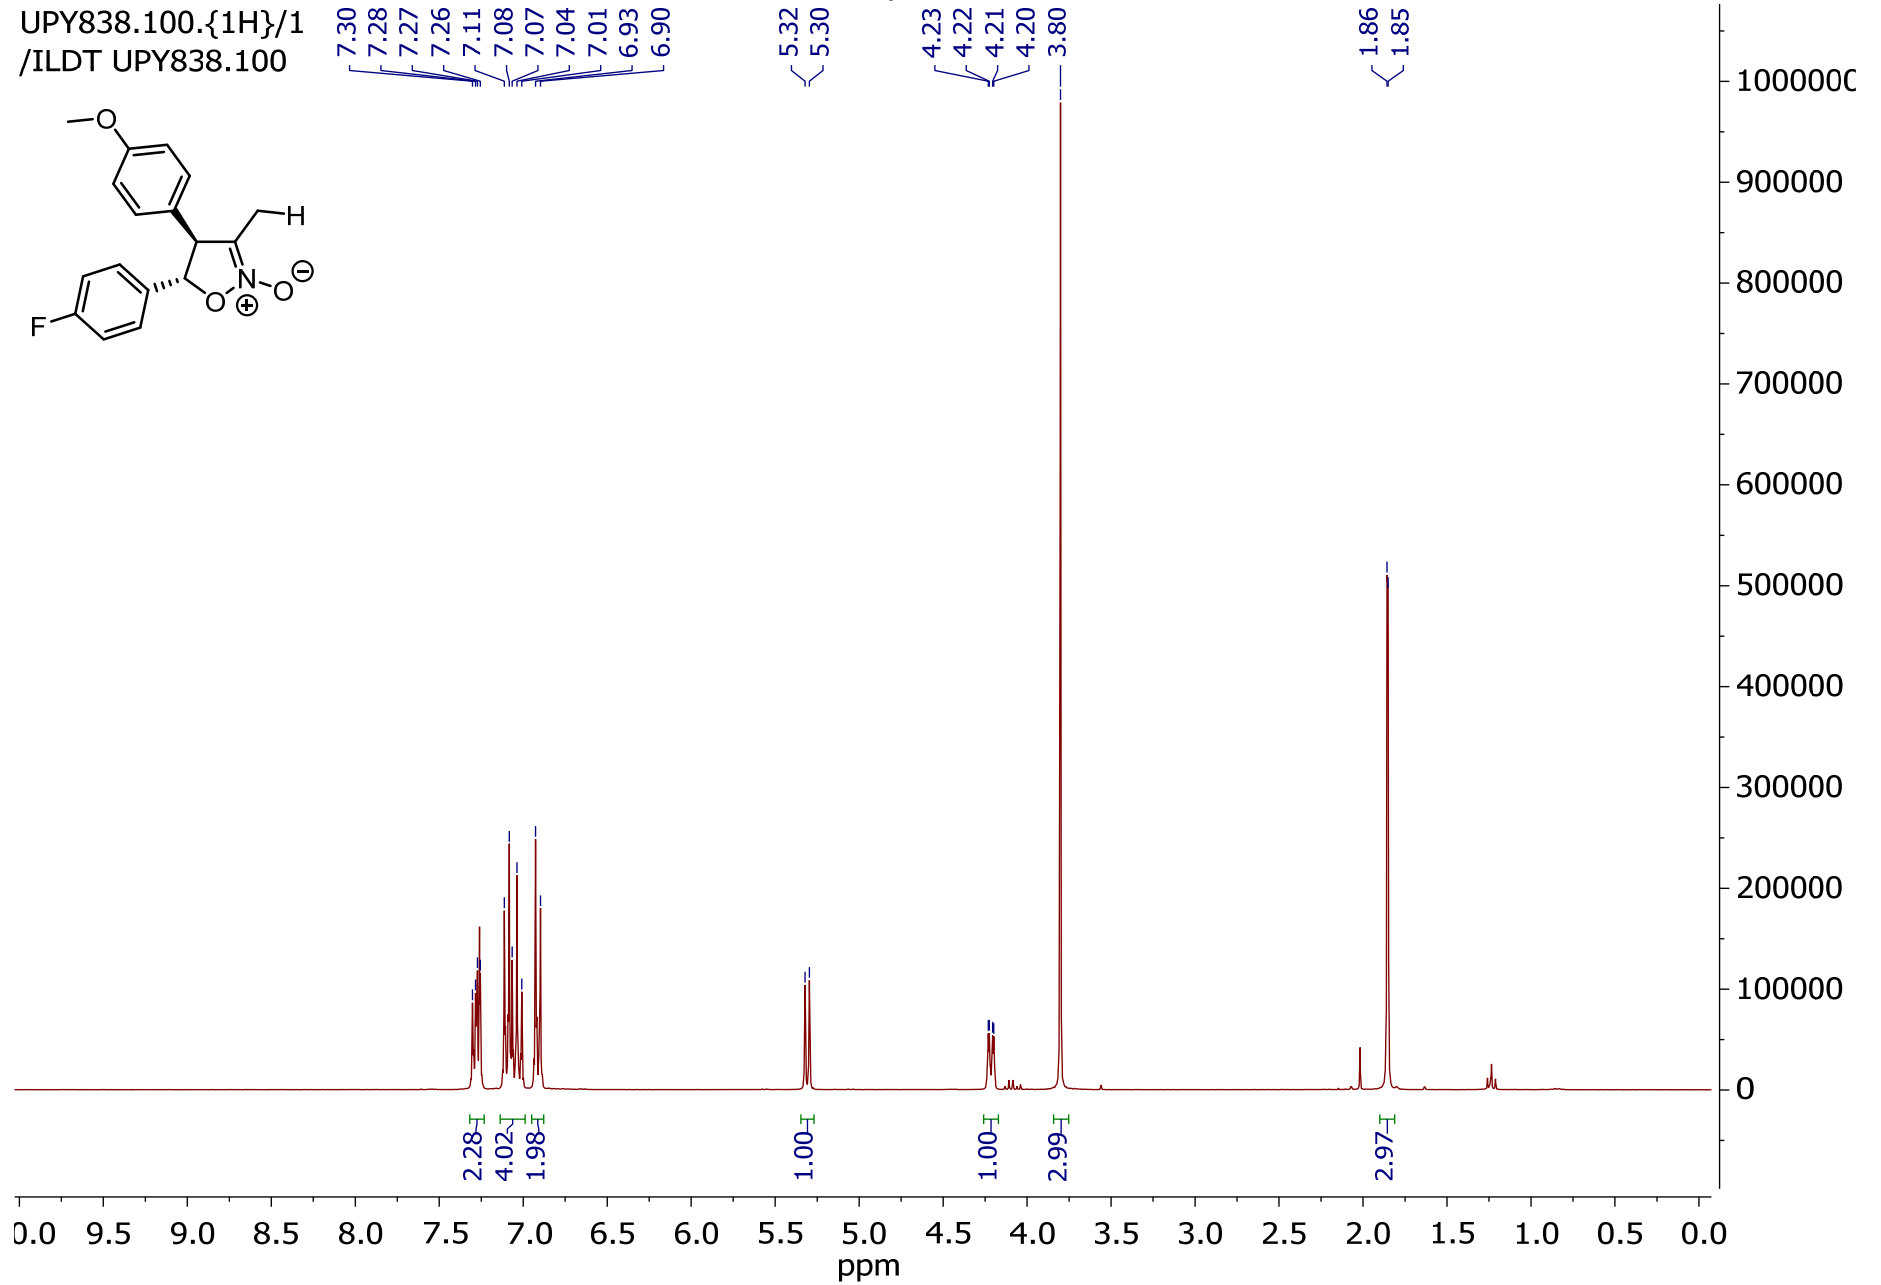

UPY838.100.{13C}/  
/ILDT UPY838.100

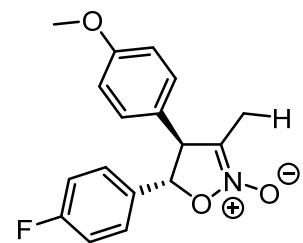

164.15  
161.27  
159.85

133.78  
133.74  
129.06  
128.63  
127.58  
127.46  
116.09  
115.80  
115.31  
114.93

83.87

77.16

60.76

55.40

10.96

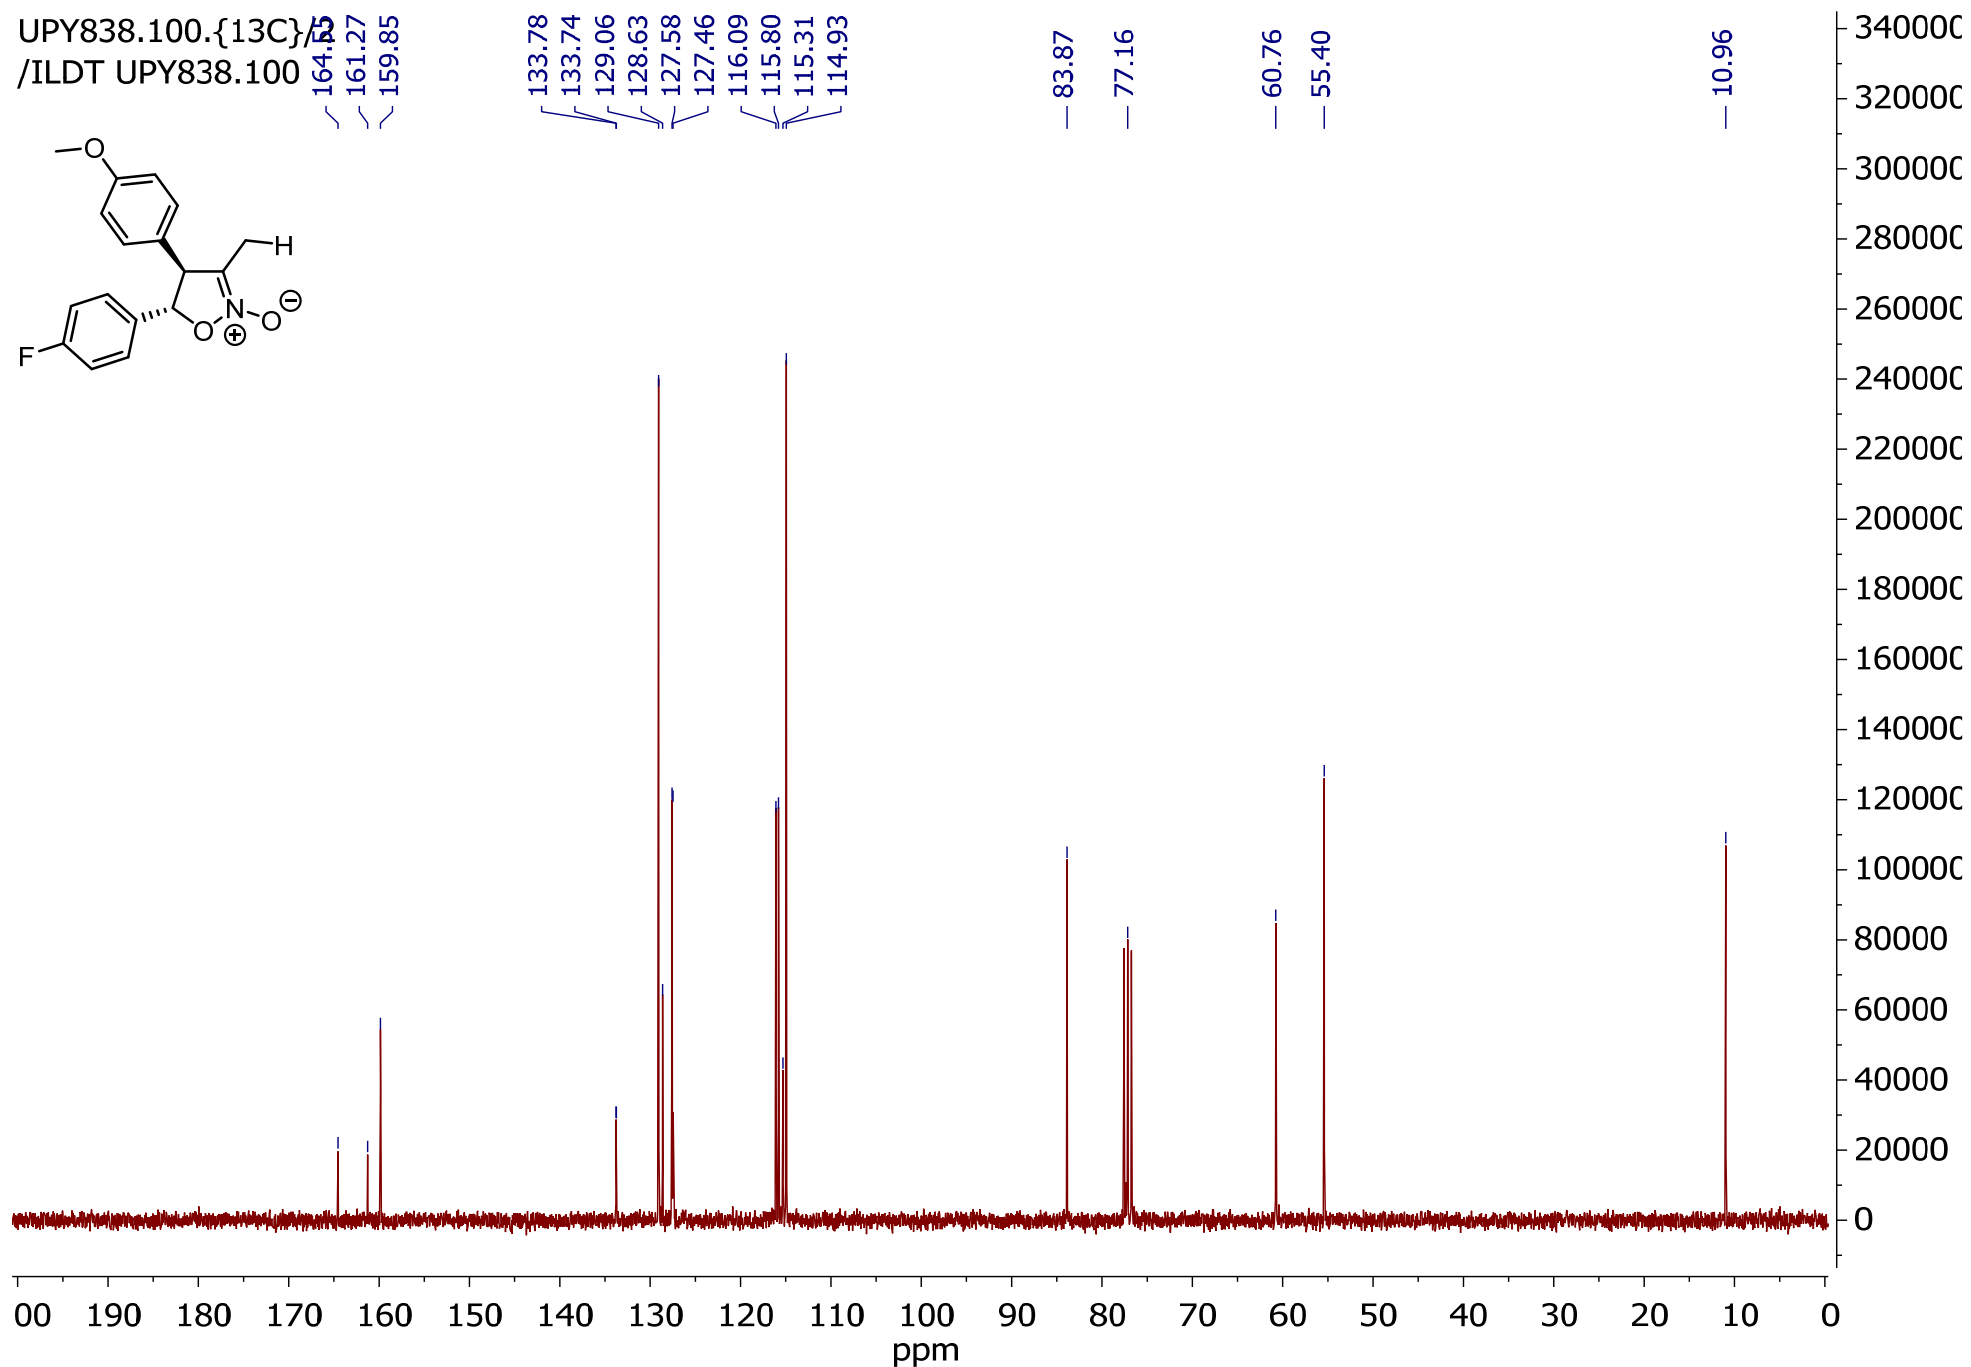

UPY838.100.{13C}deptspl3/3  
/ILDIT UPY838.100

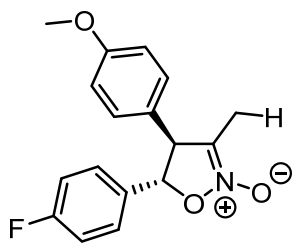

129.56  
127.57  
127.46  
116.08  
115.80  
114.93

83.87

60.76

55.40

10.96

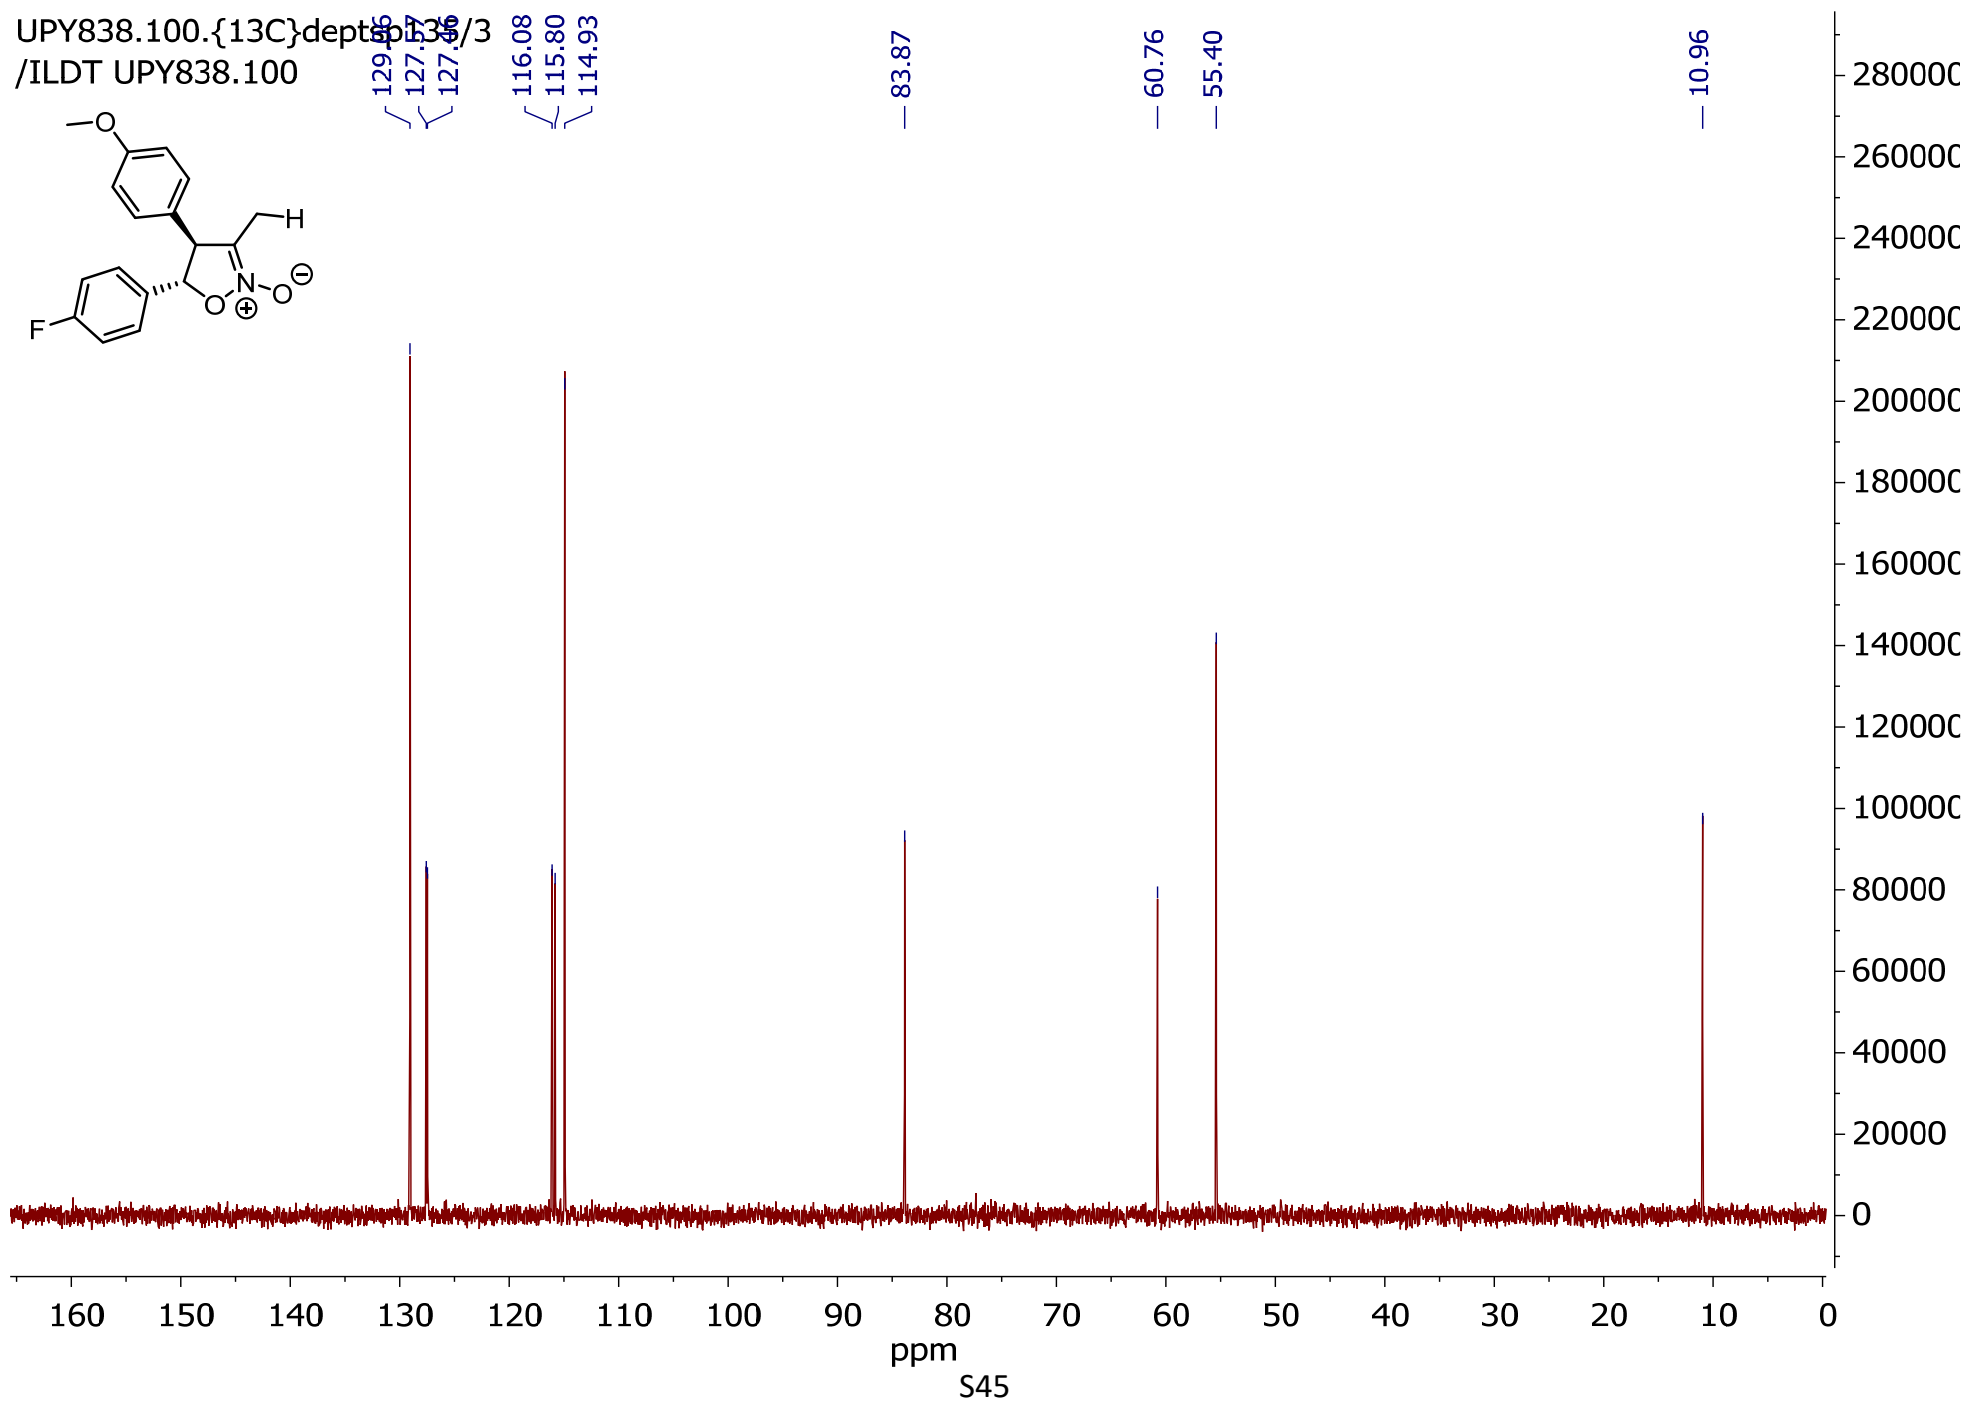

UPY838.100.{19F}INVGATED/4  
/ILDIT UPY838.100

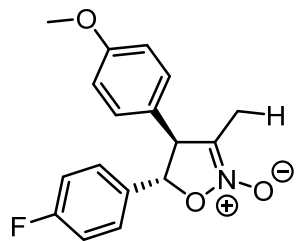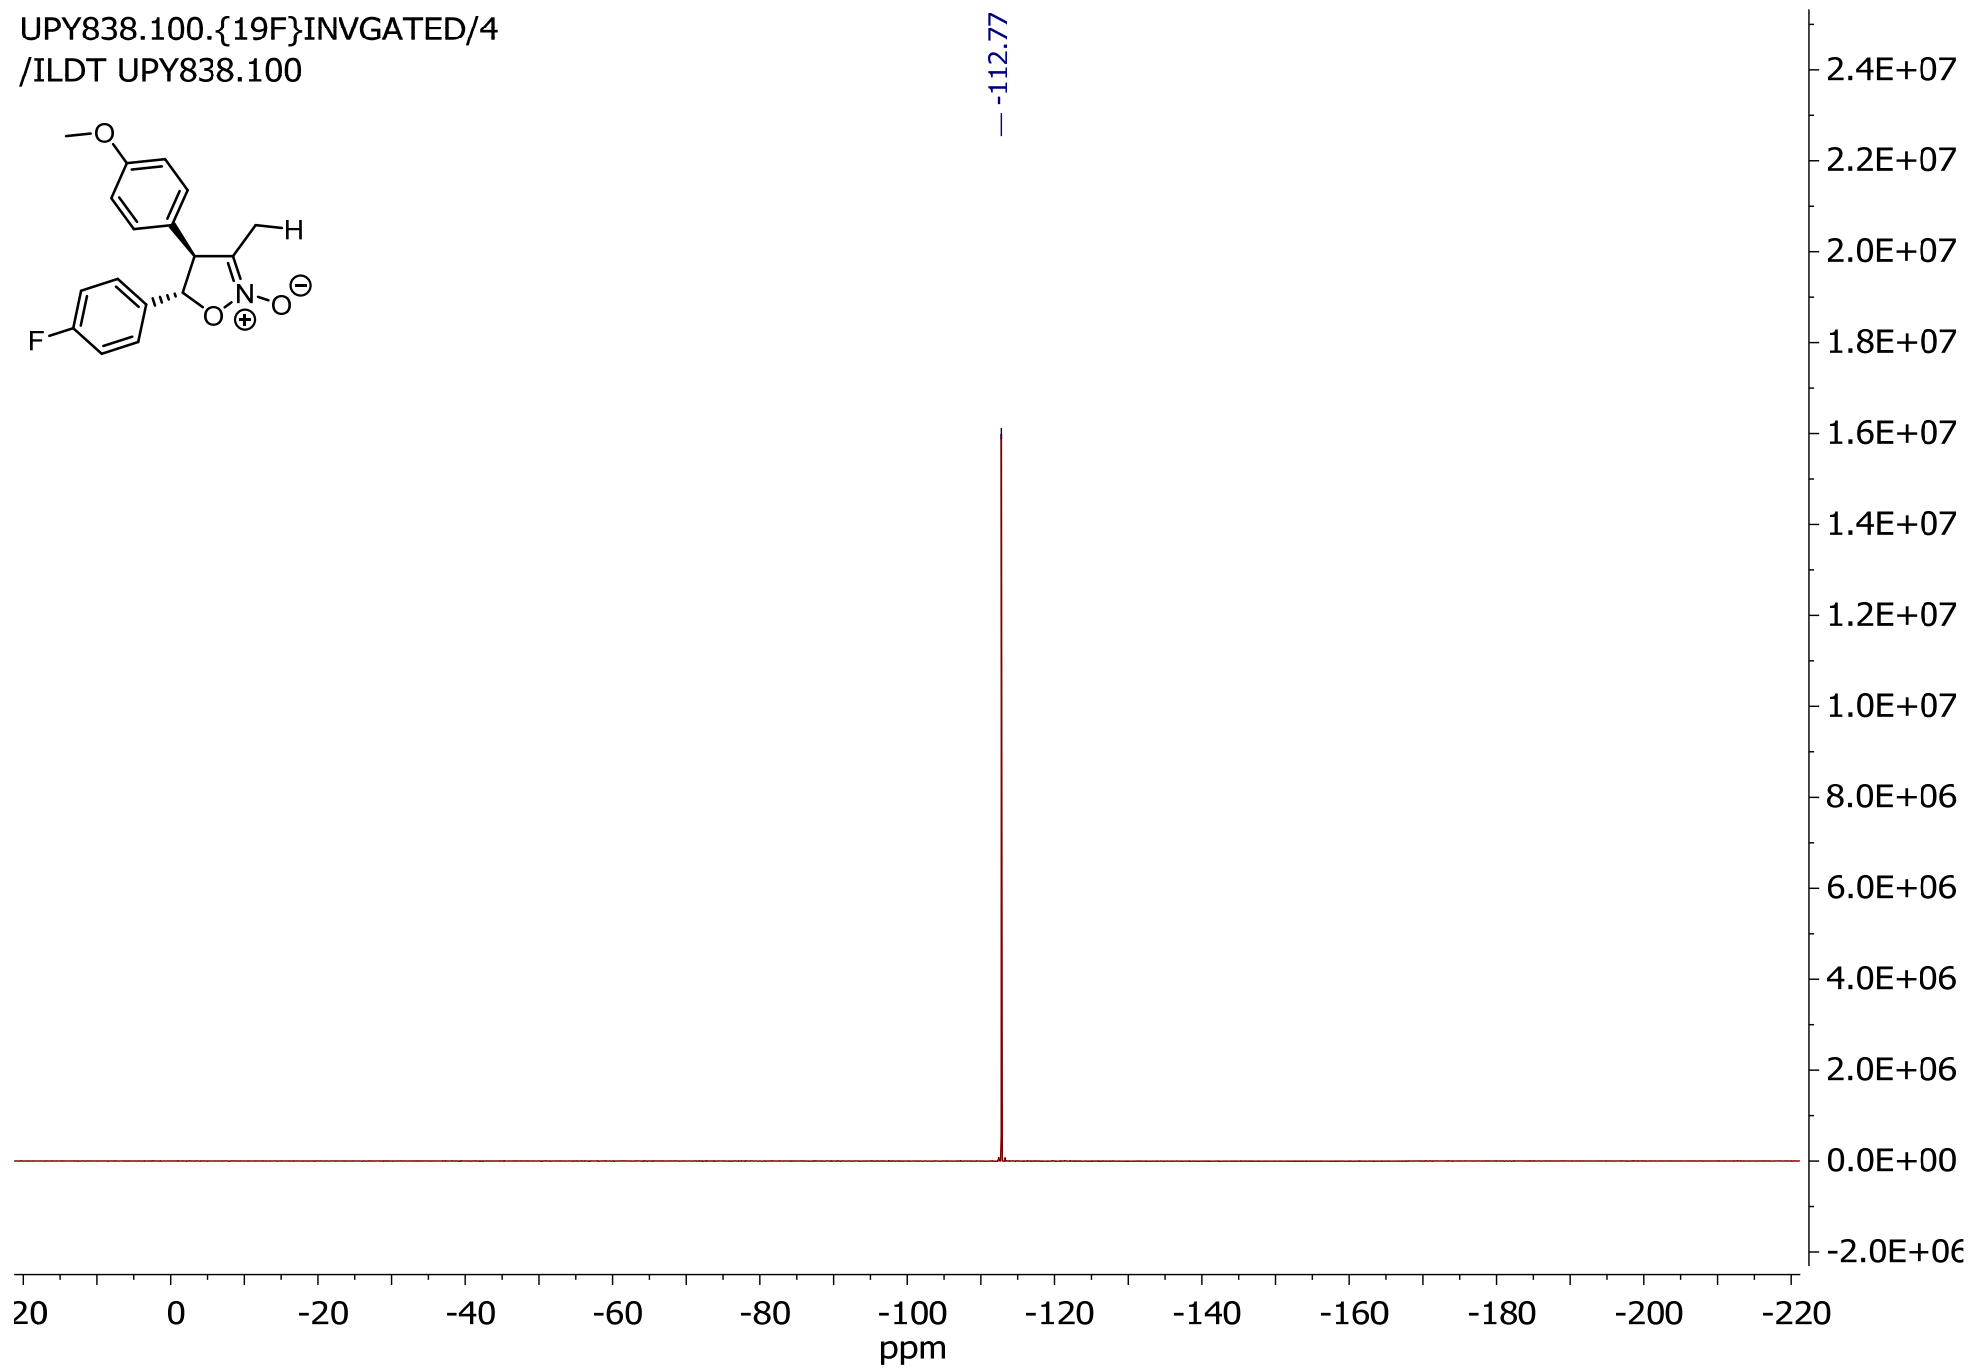

S46

UPYST2.100.{1H}/1  
/ILD T UPYST2.100

### NMR spectra of 5a

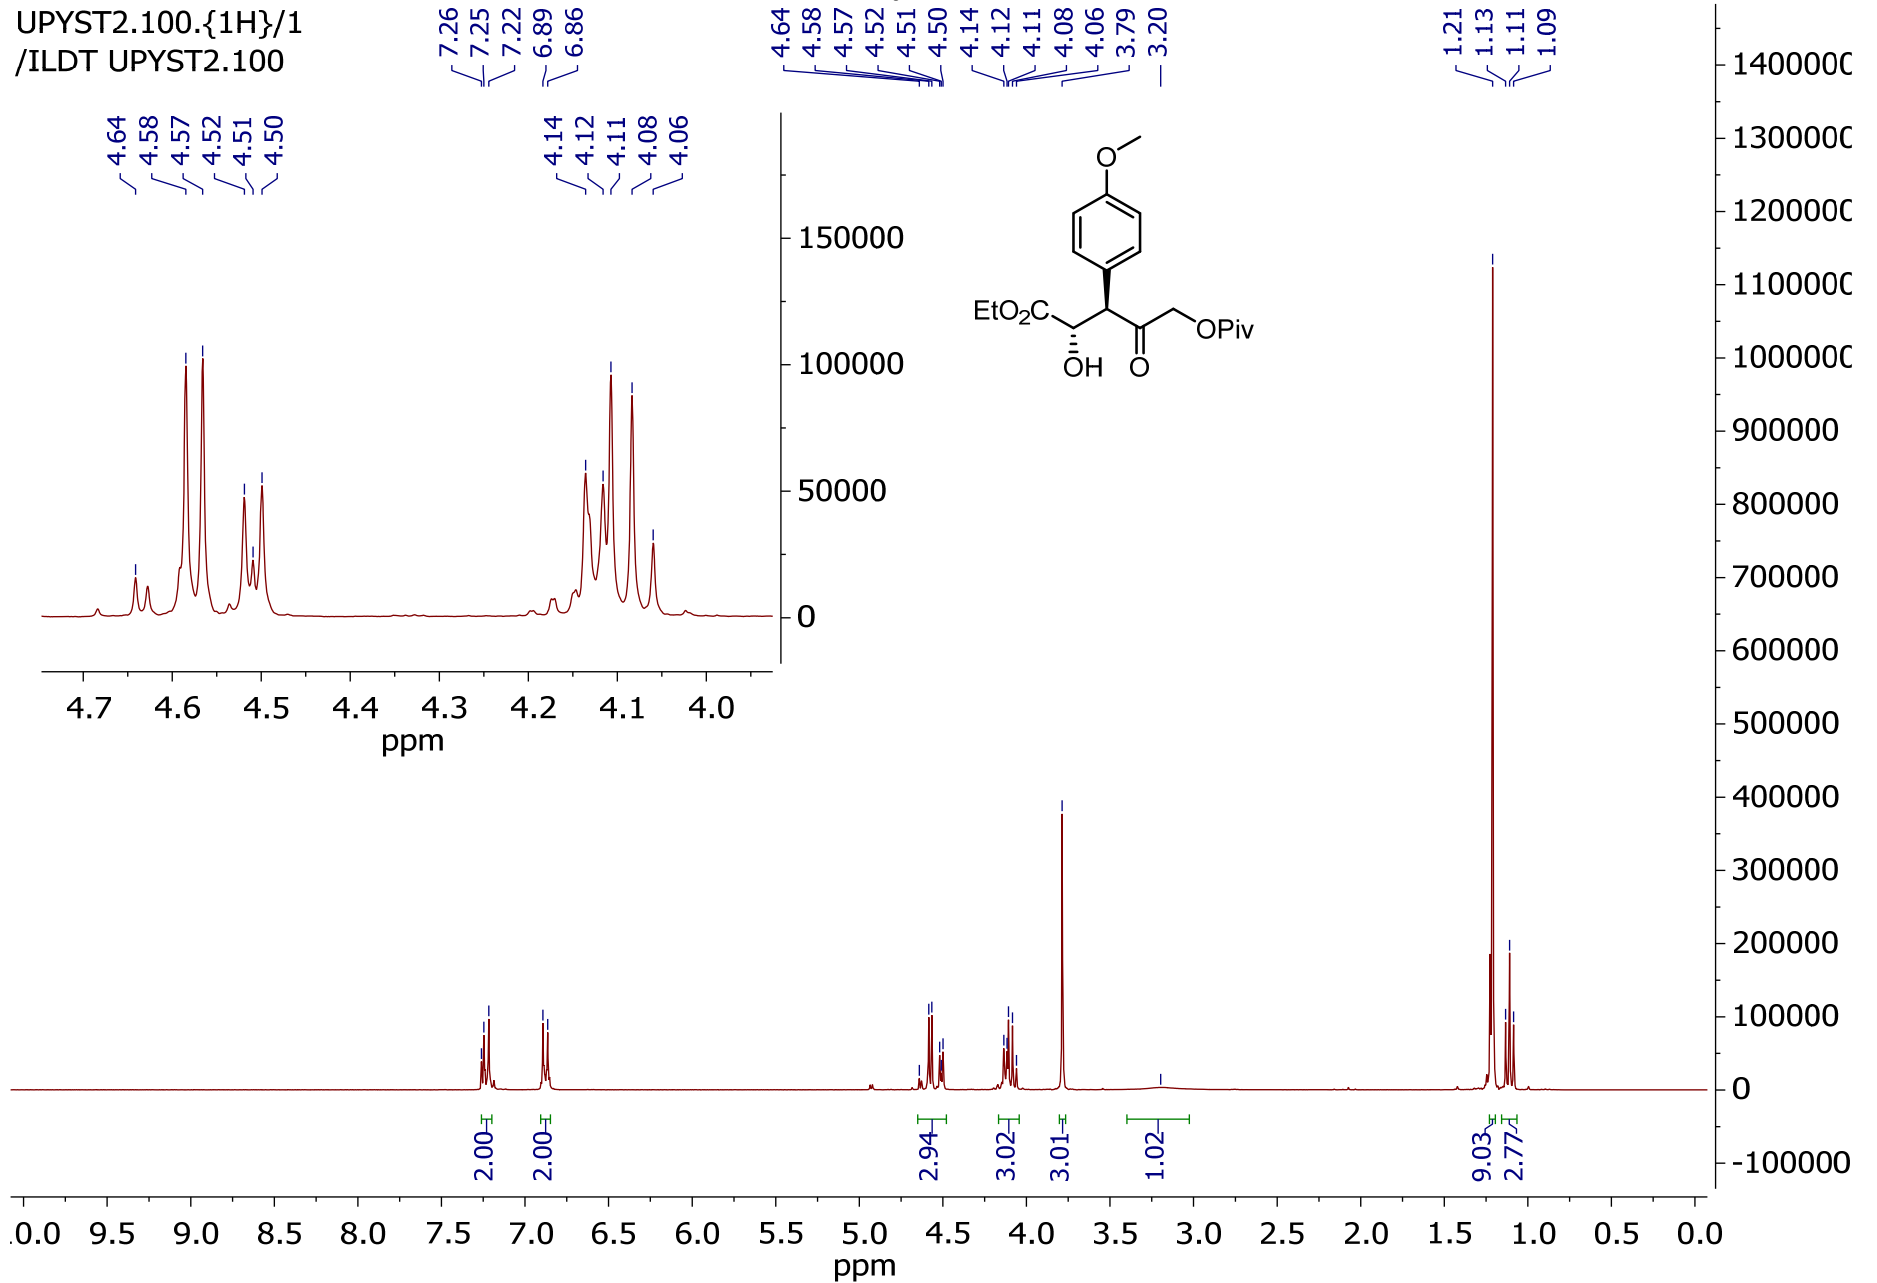

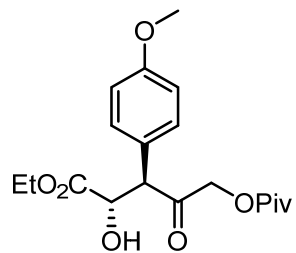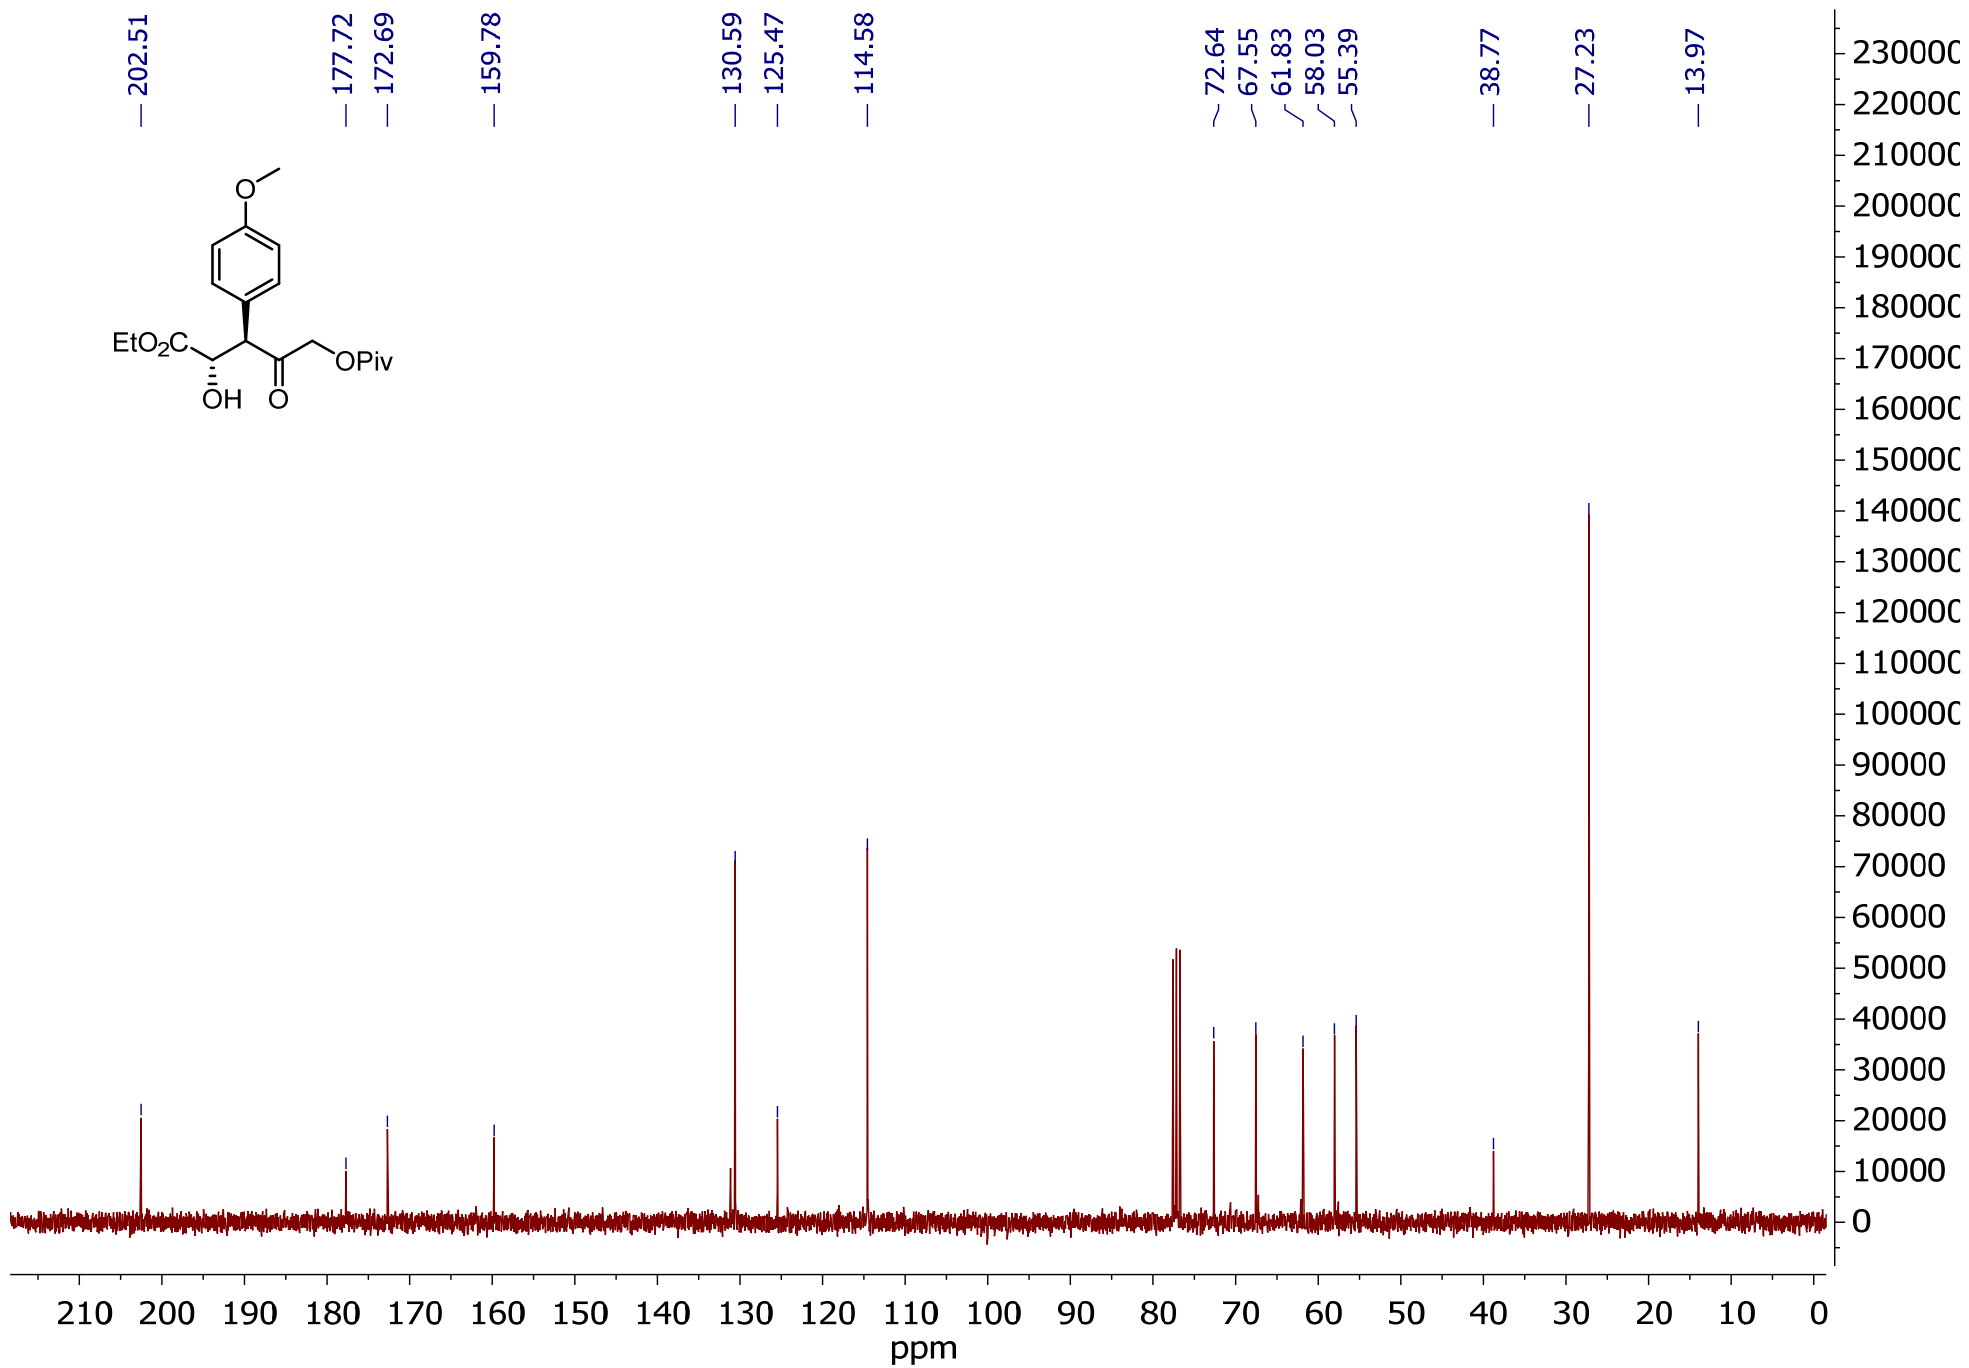



UPYST2.100.{13C}deptsp135/3  
/ILD T UPYST2.100

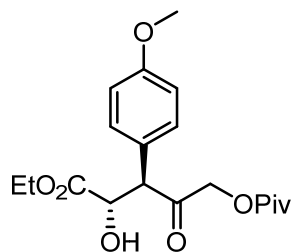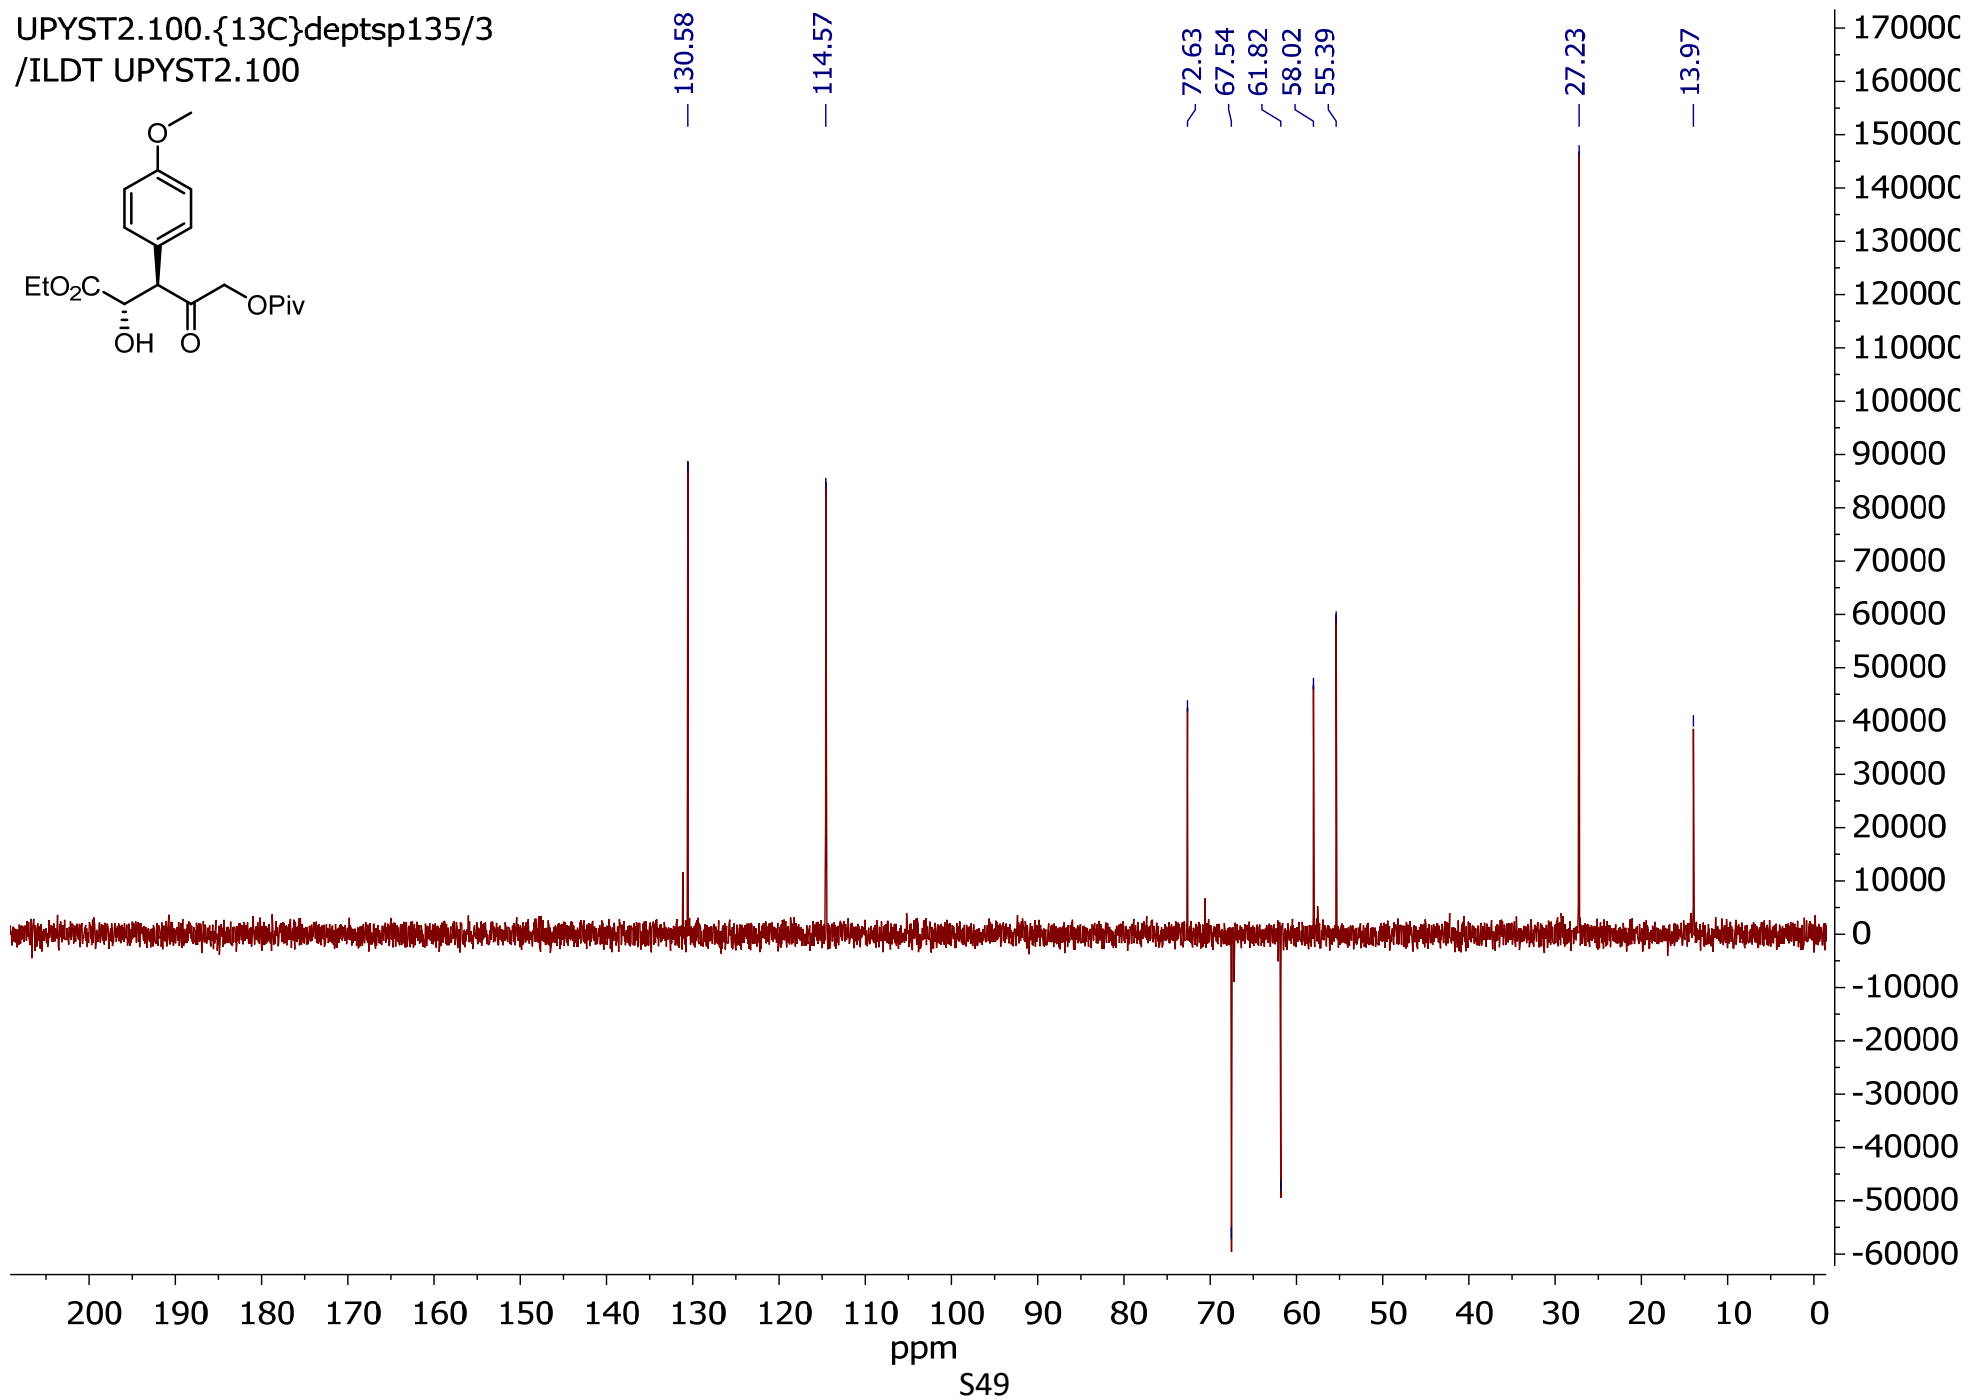

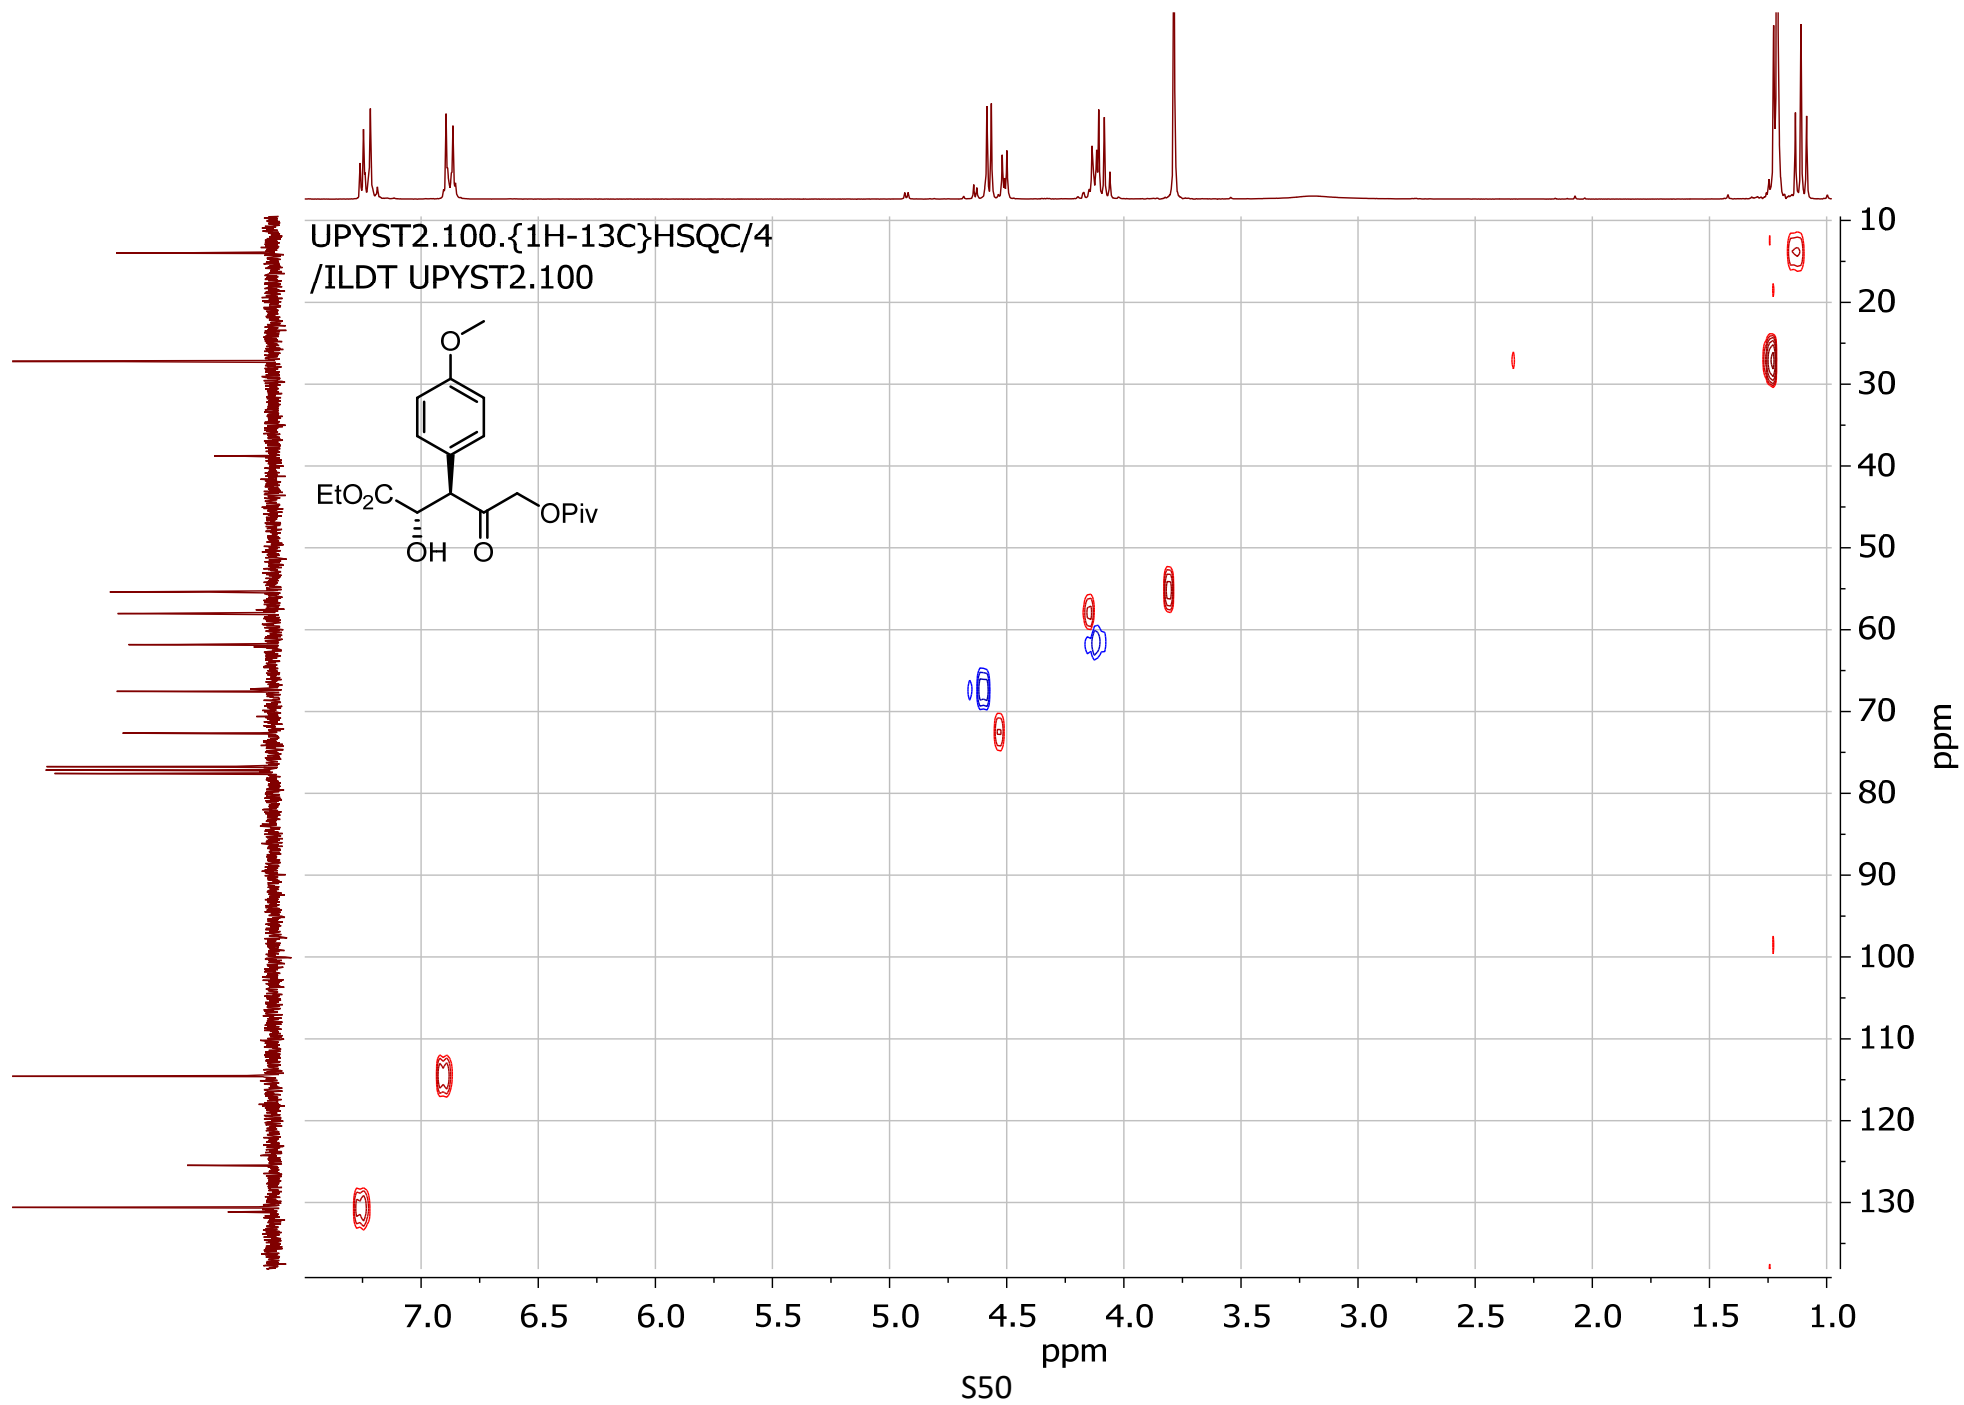

UPY770.200.{1H}/1  
/ILDT UPY770.200 Suhorukov-01411

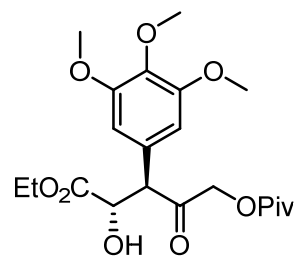

### NMR spectra of 5b

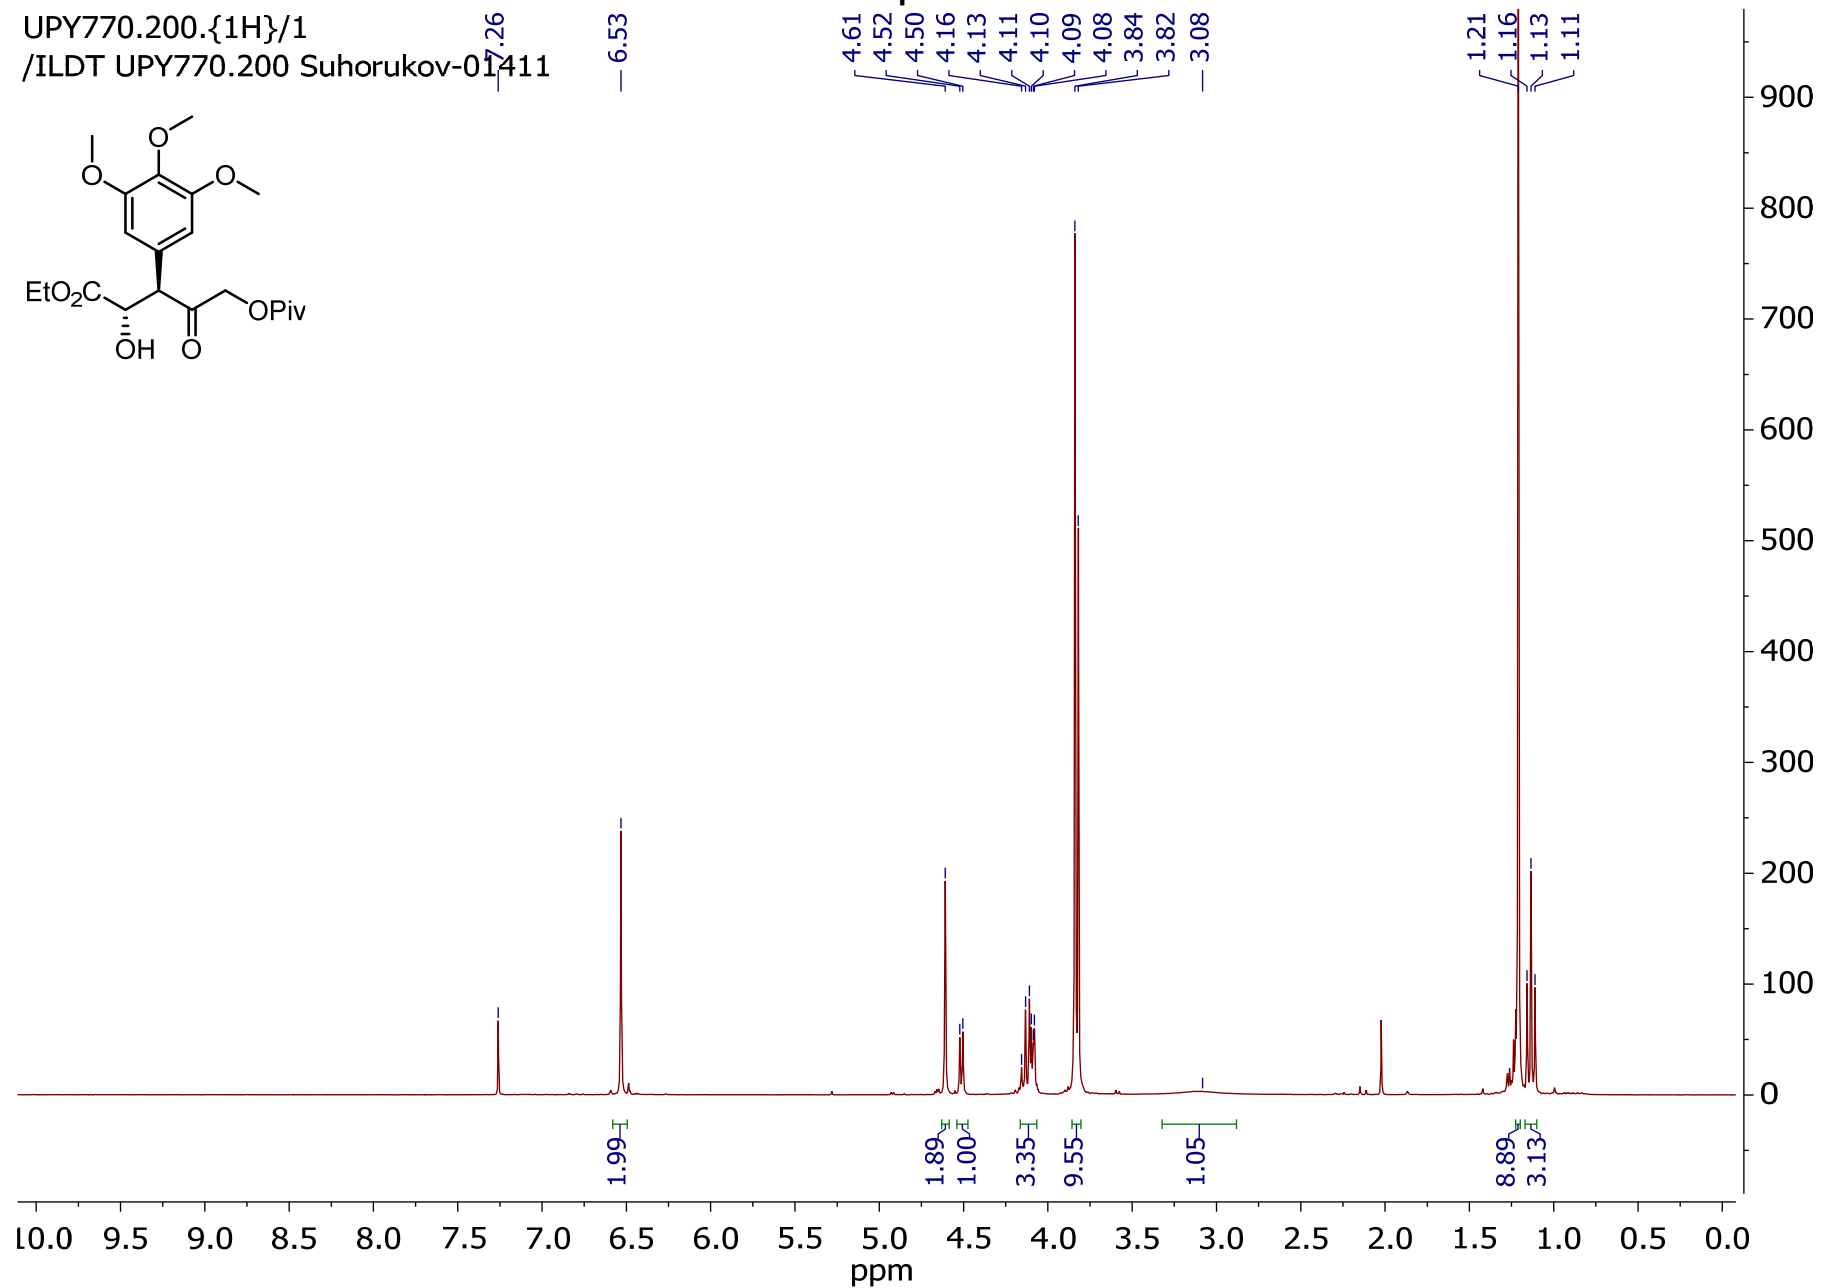

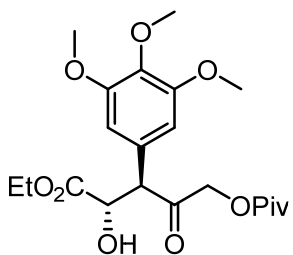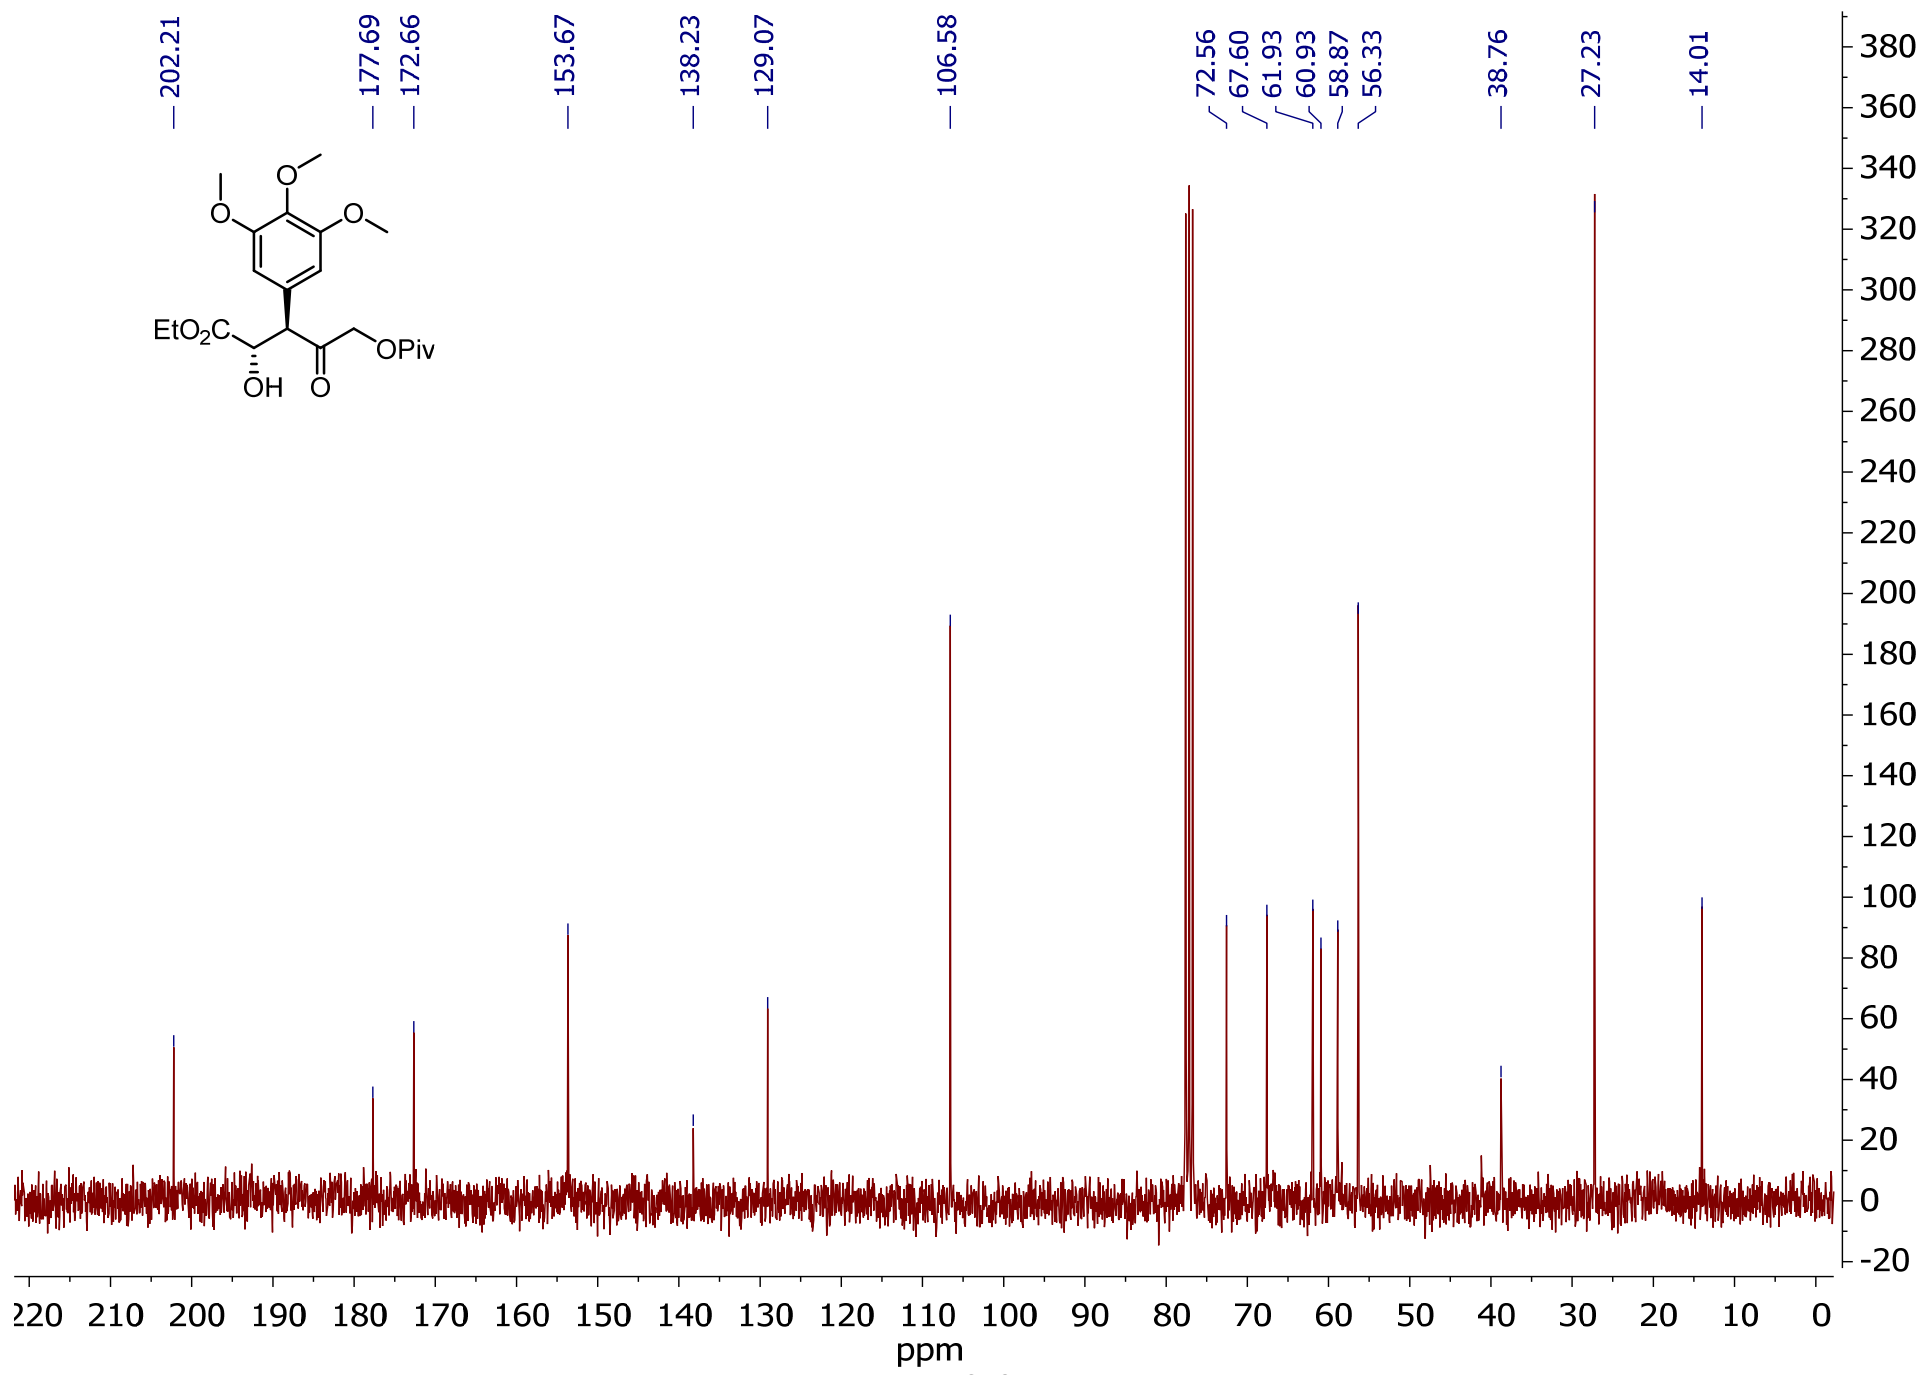

UPY770.200.{13C}depts135/3  
/ILDTP UPY770.200 Suhorukov-01411

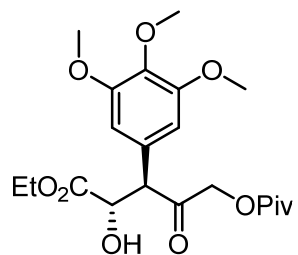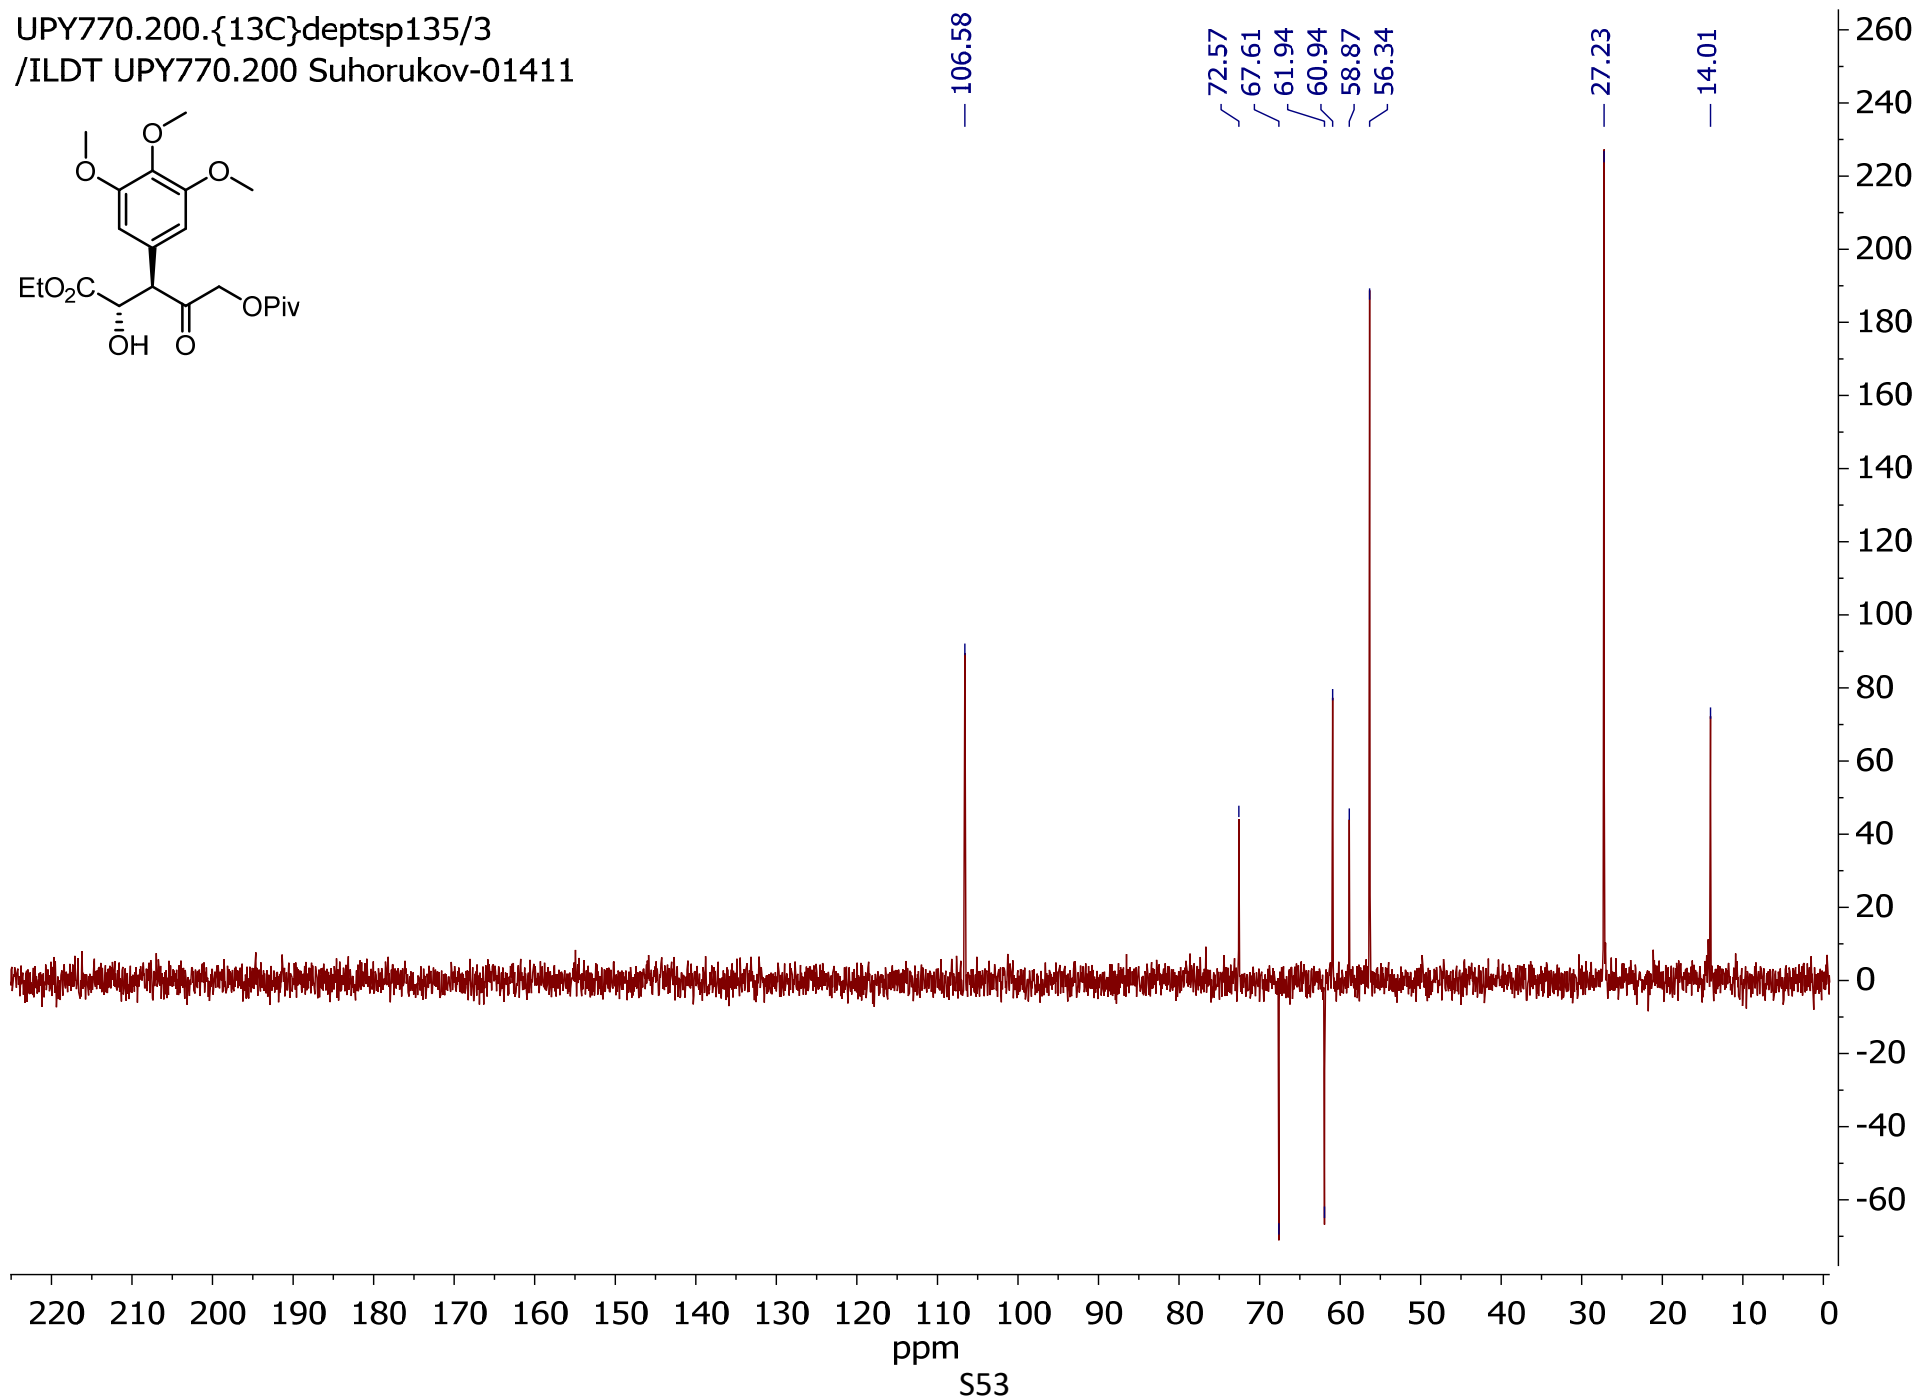

UPY770.200.{1H-13C}HSQC/4  
/ILDT UPY770.200 Suhorukov-01411

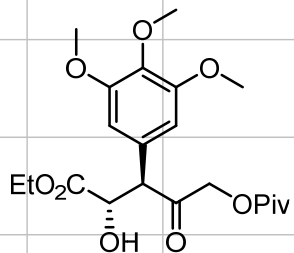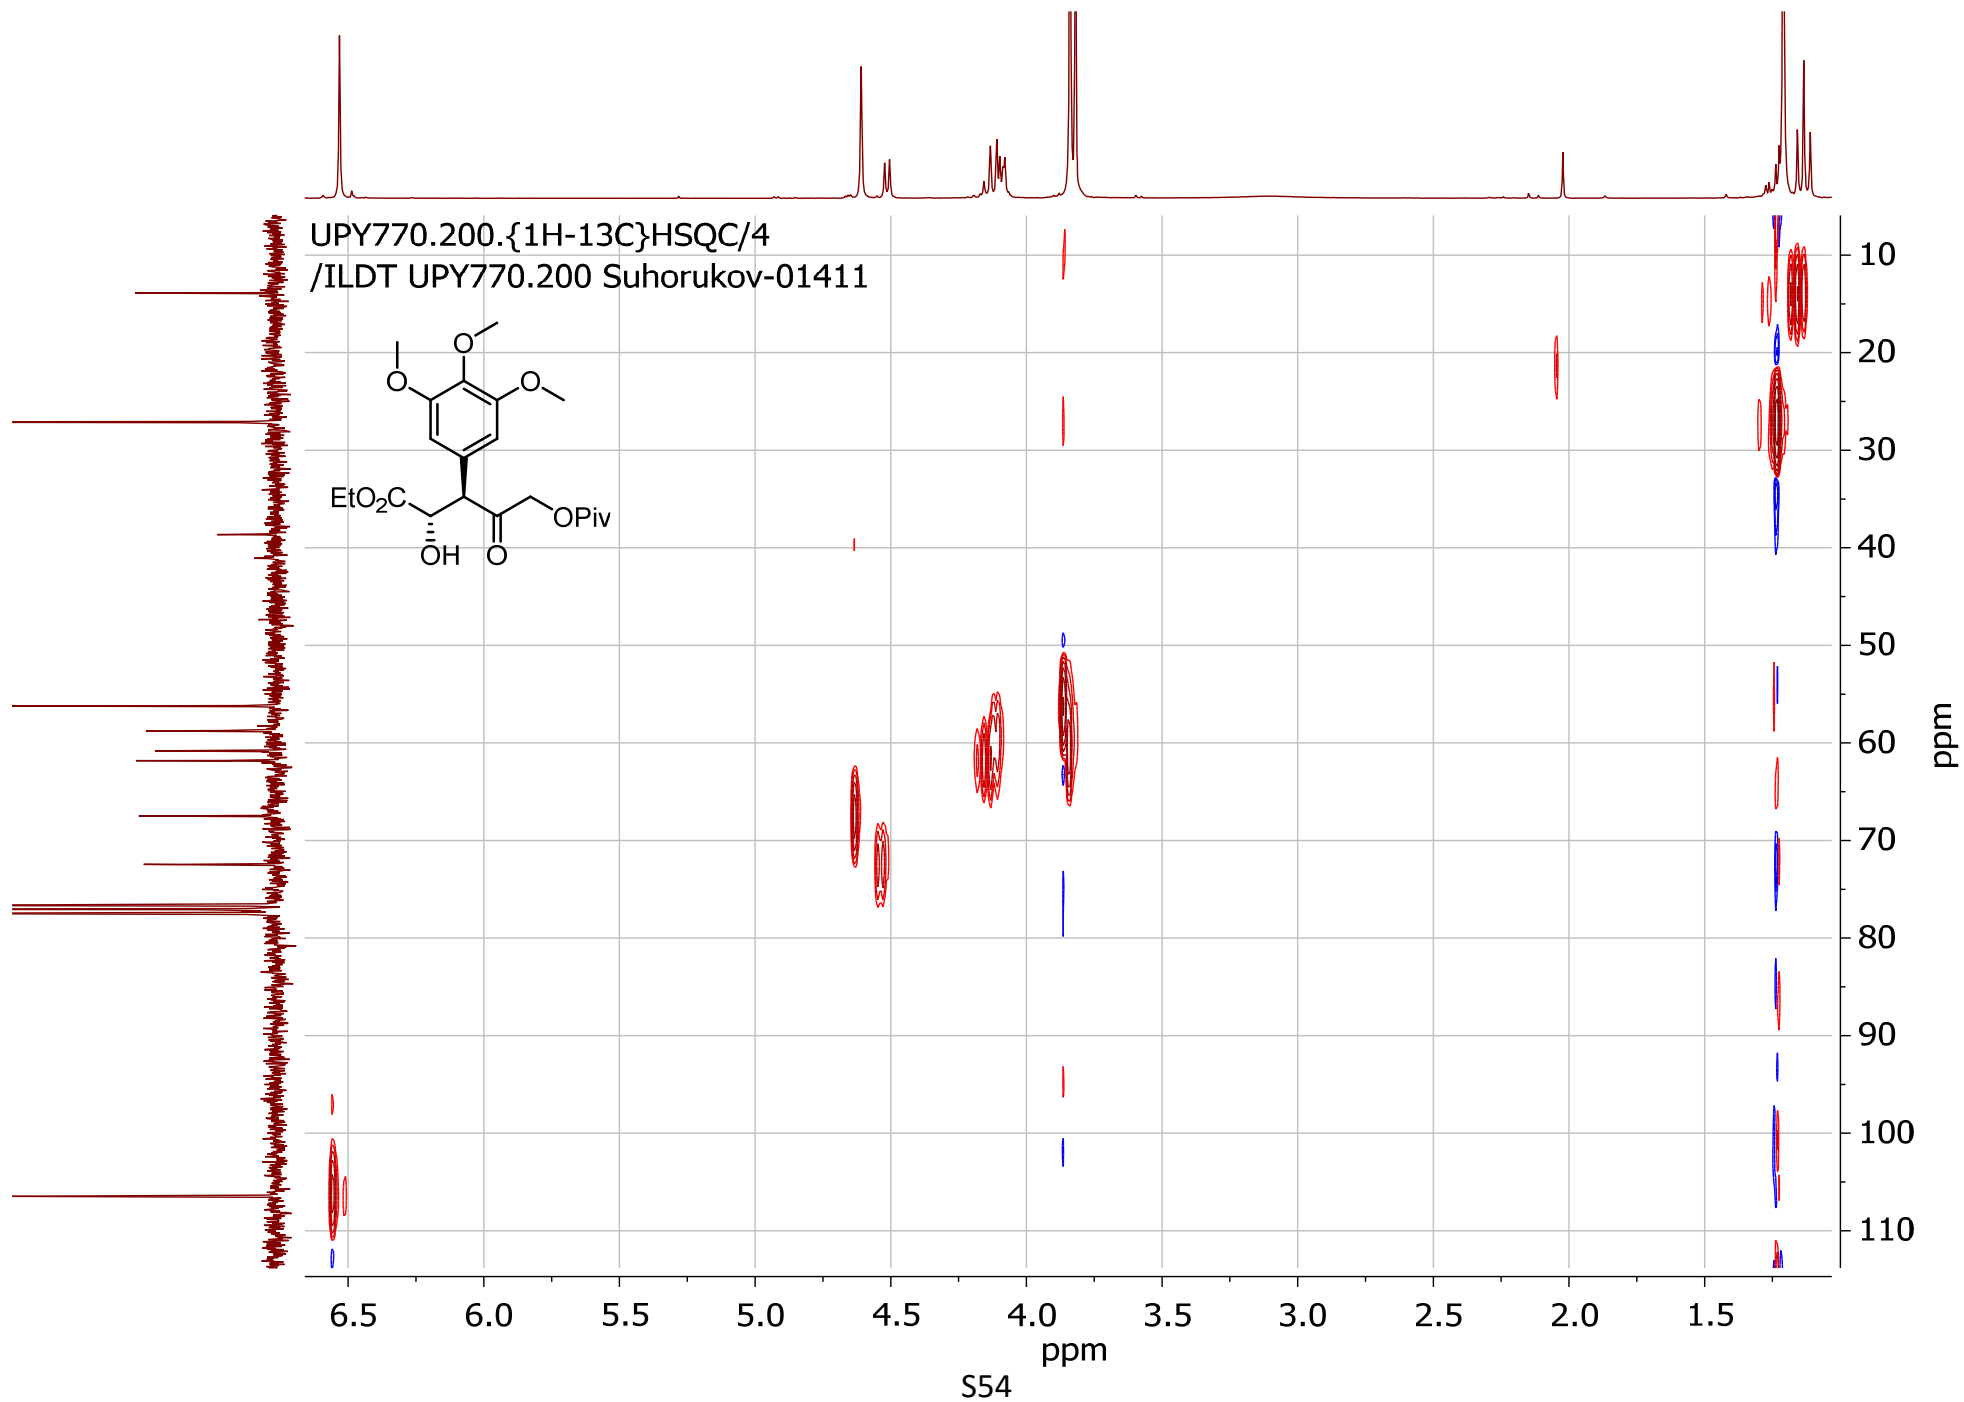

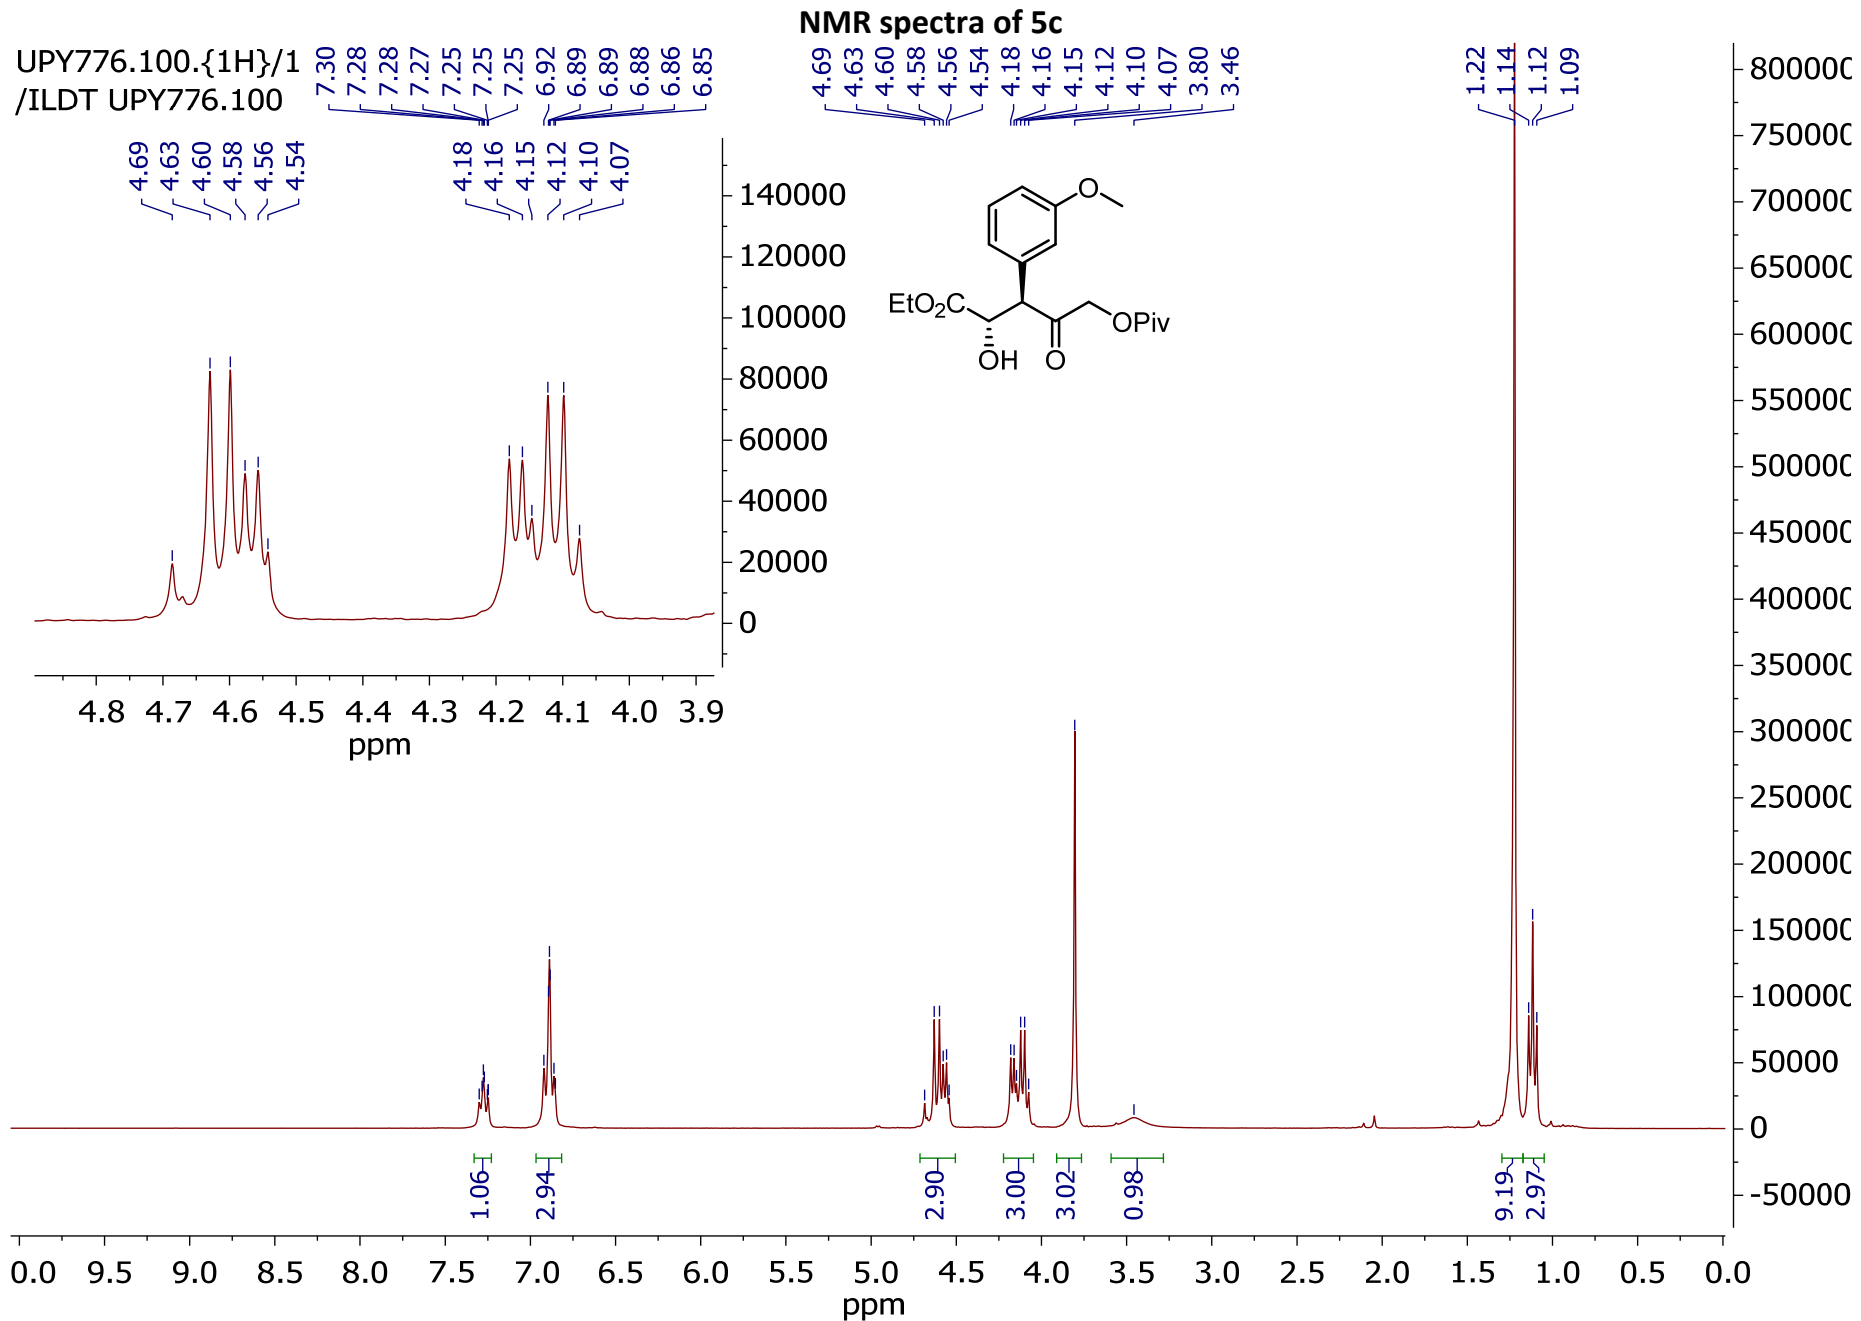

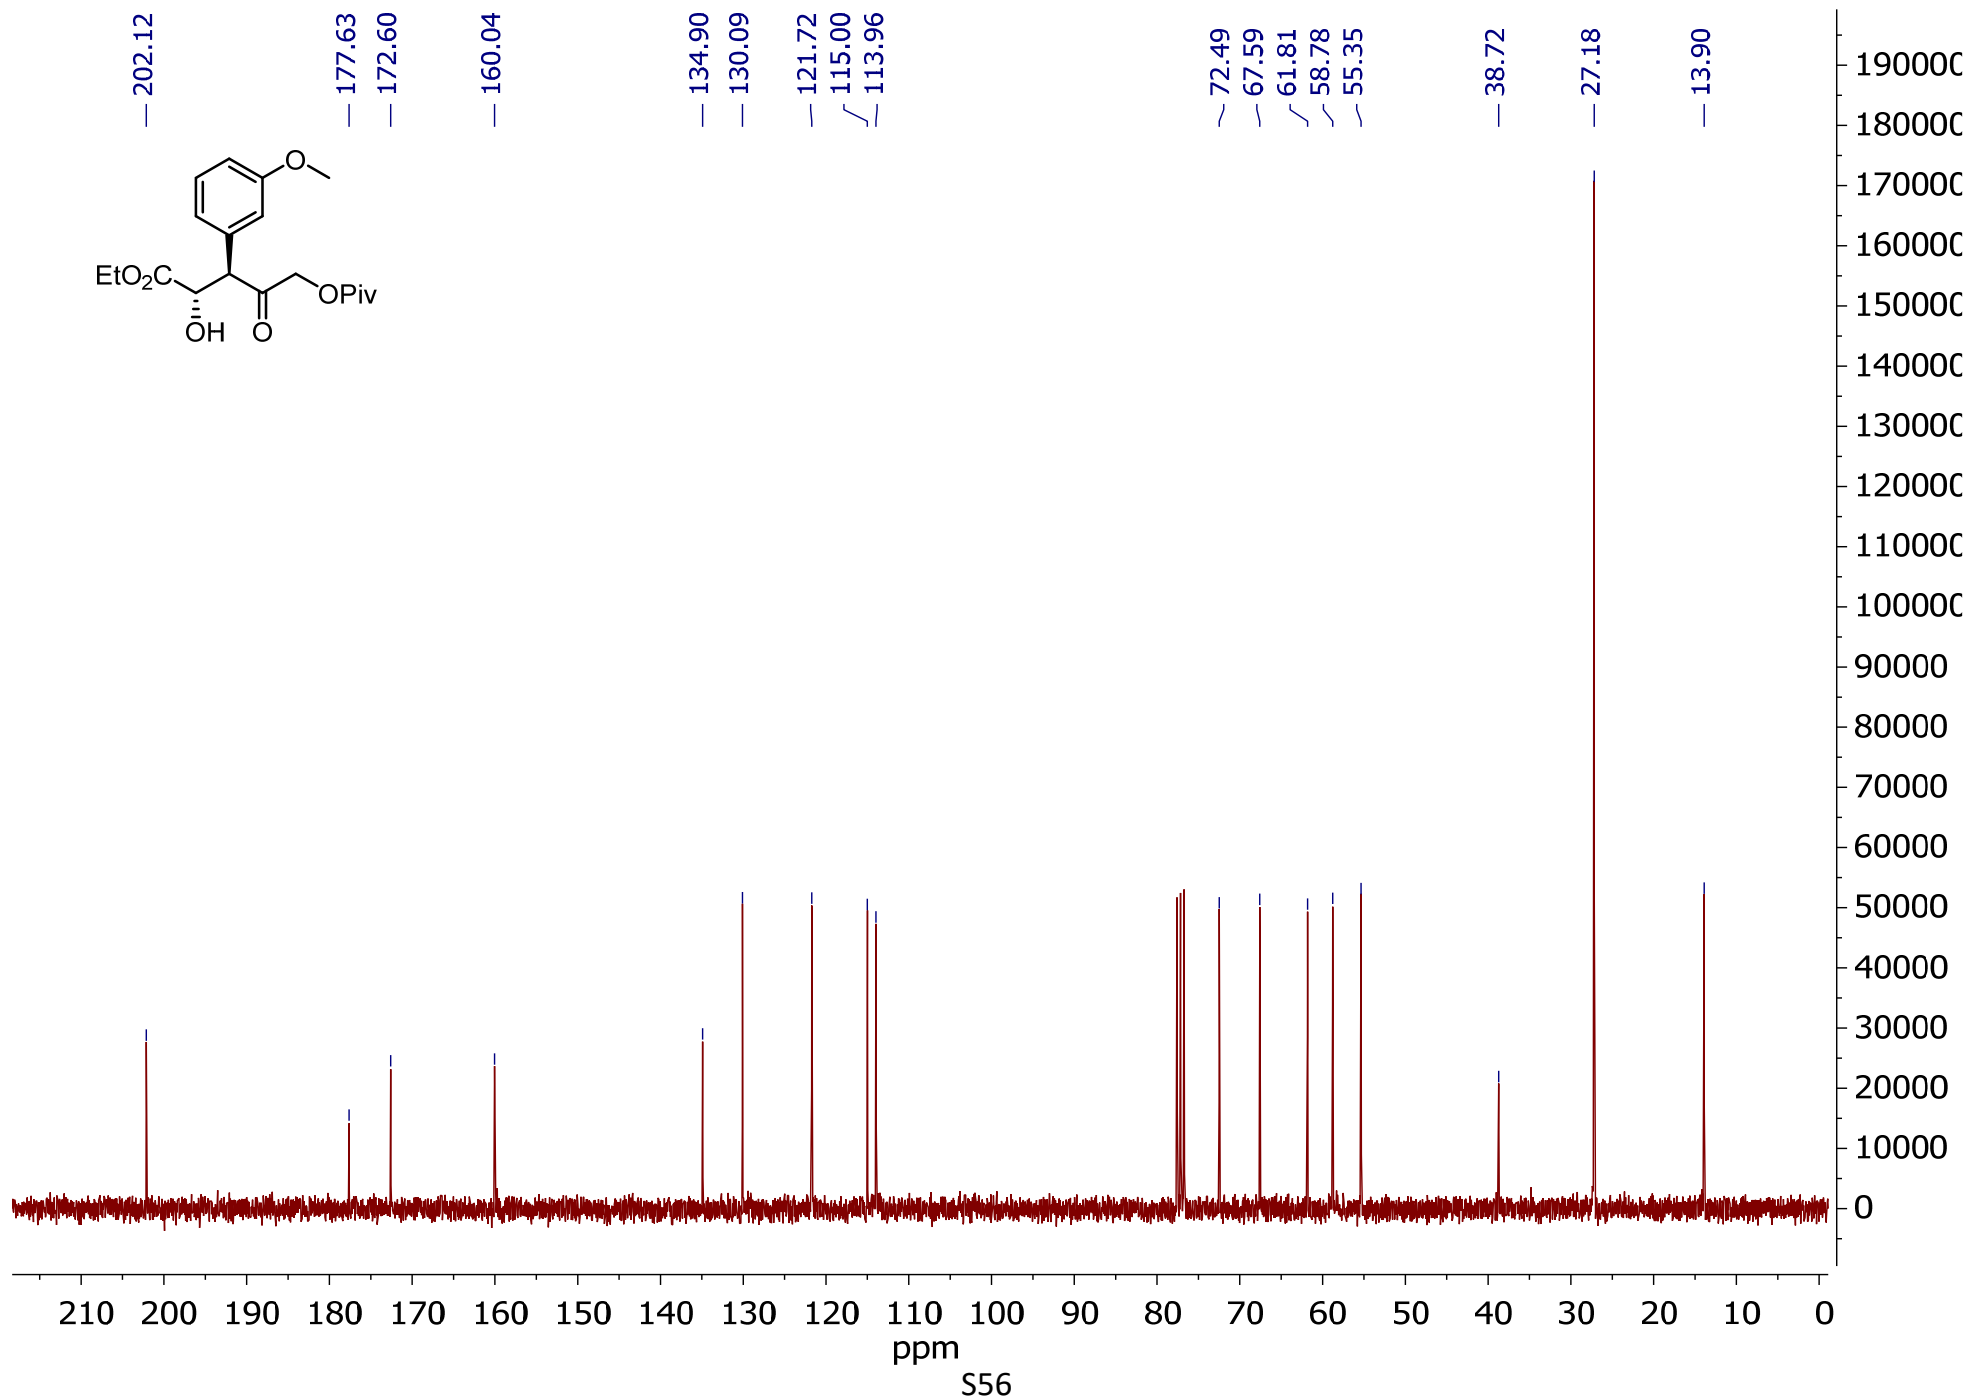



UPY776.100.{13C}depts135/3  
/ILD T UPY776.100

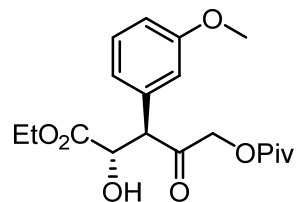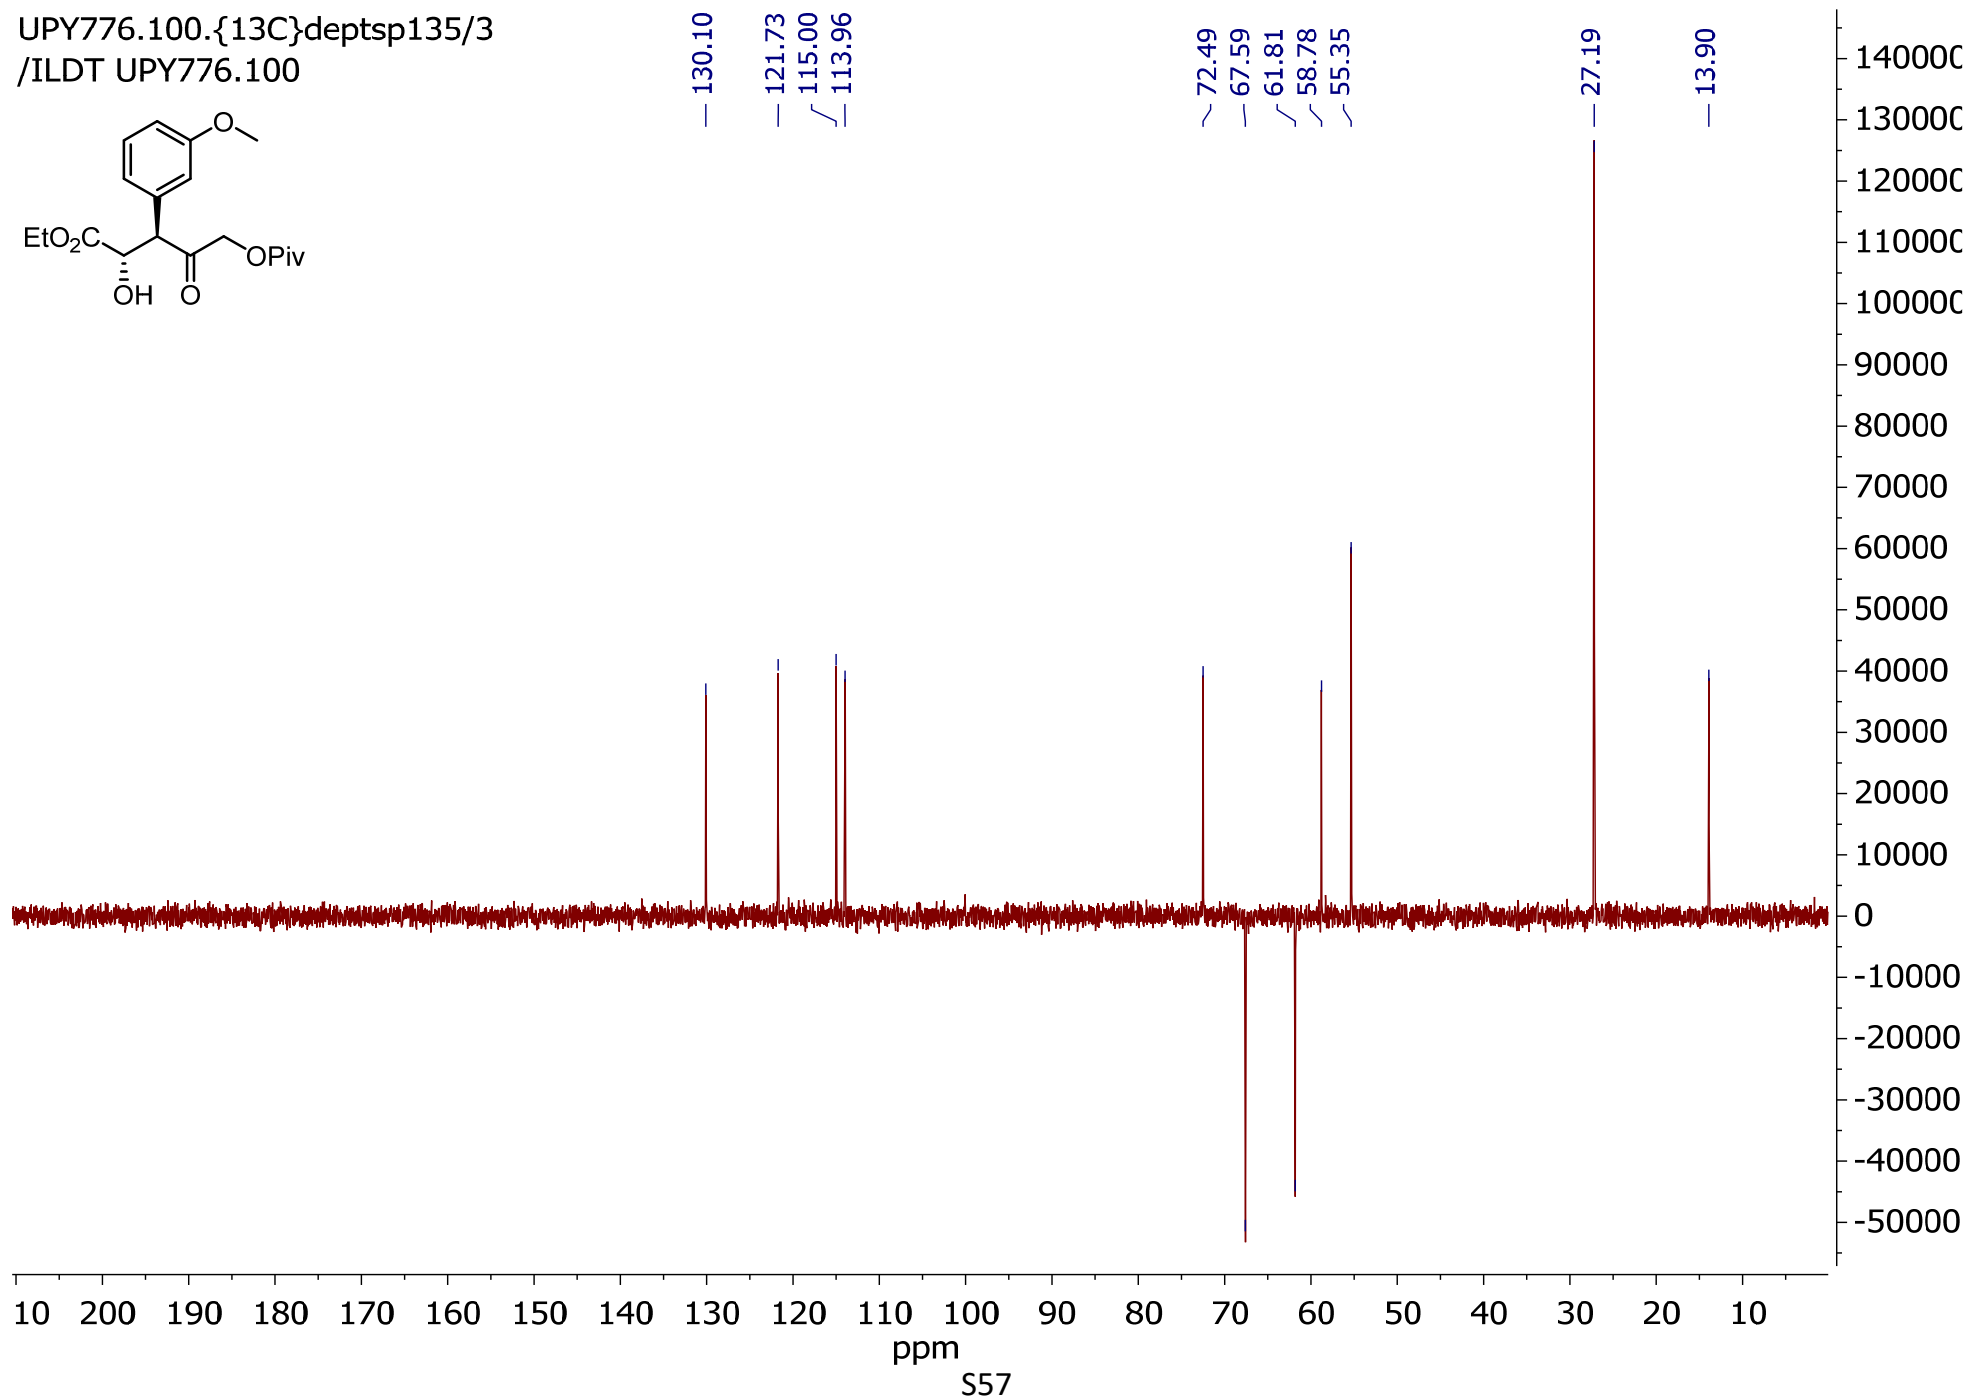

UPY791.100.{1H}/1  
/ILDY791.100

### NMR spectra of 5d

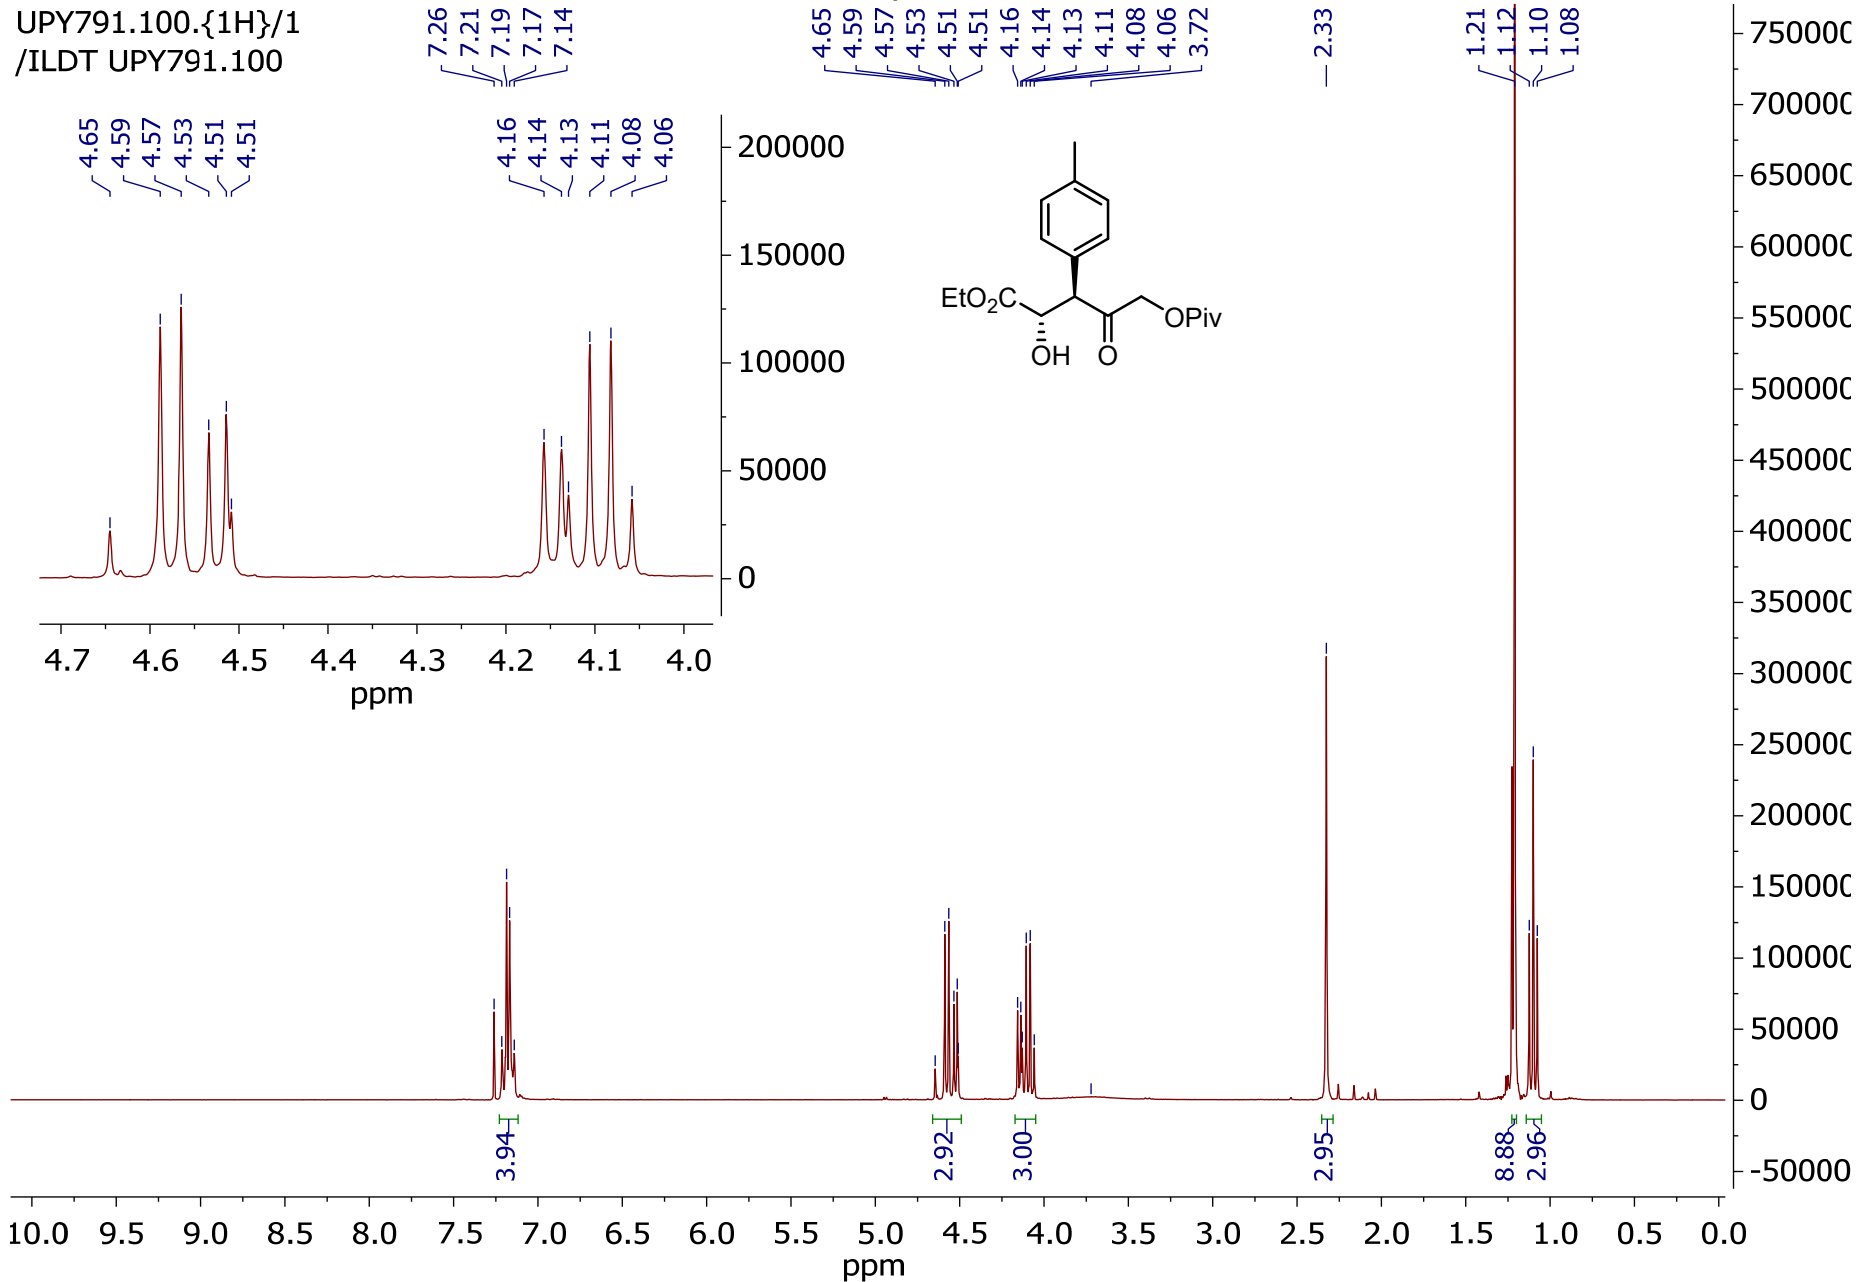

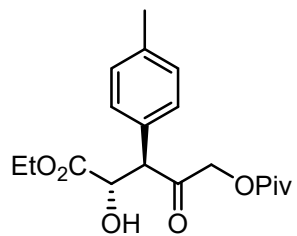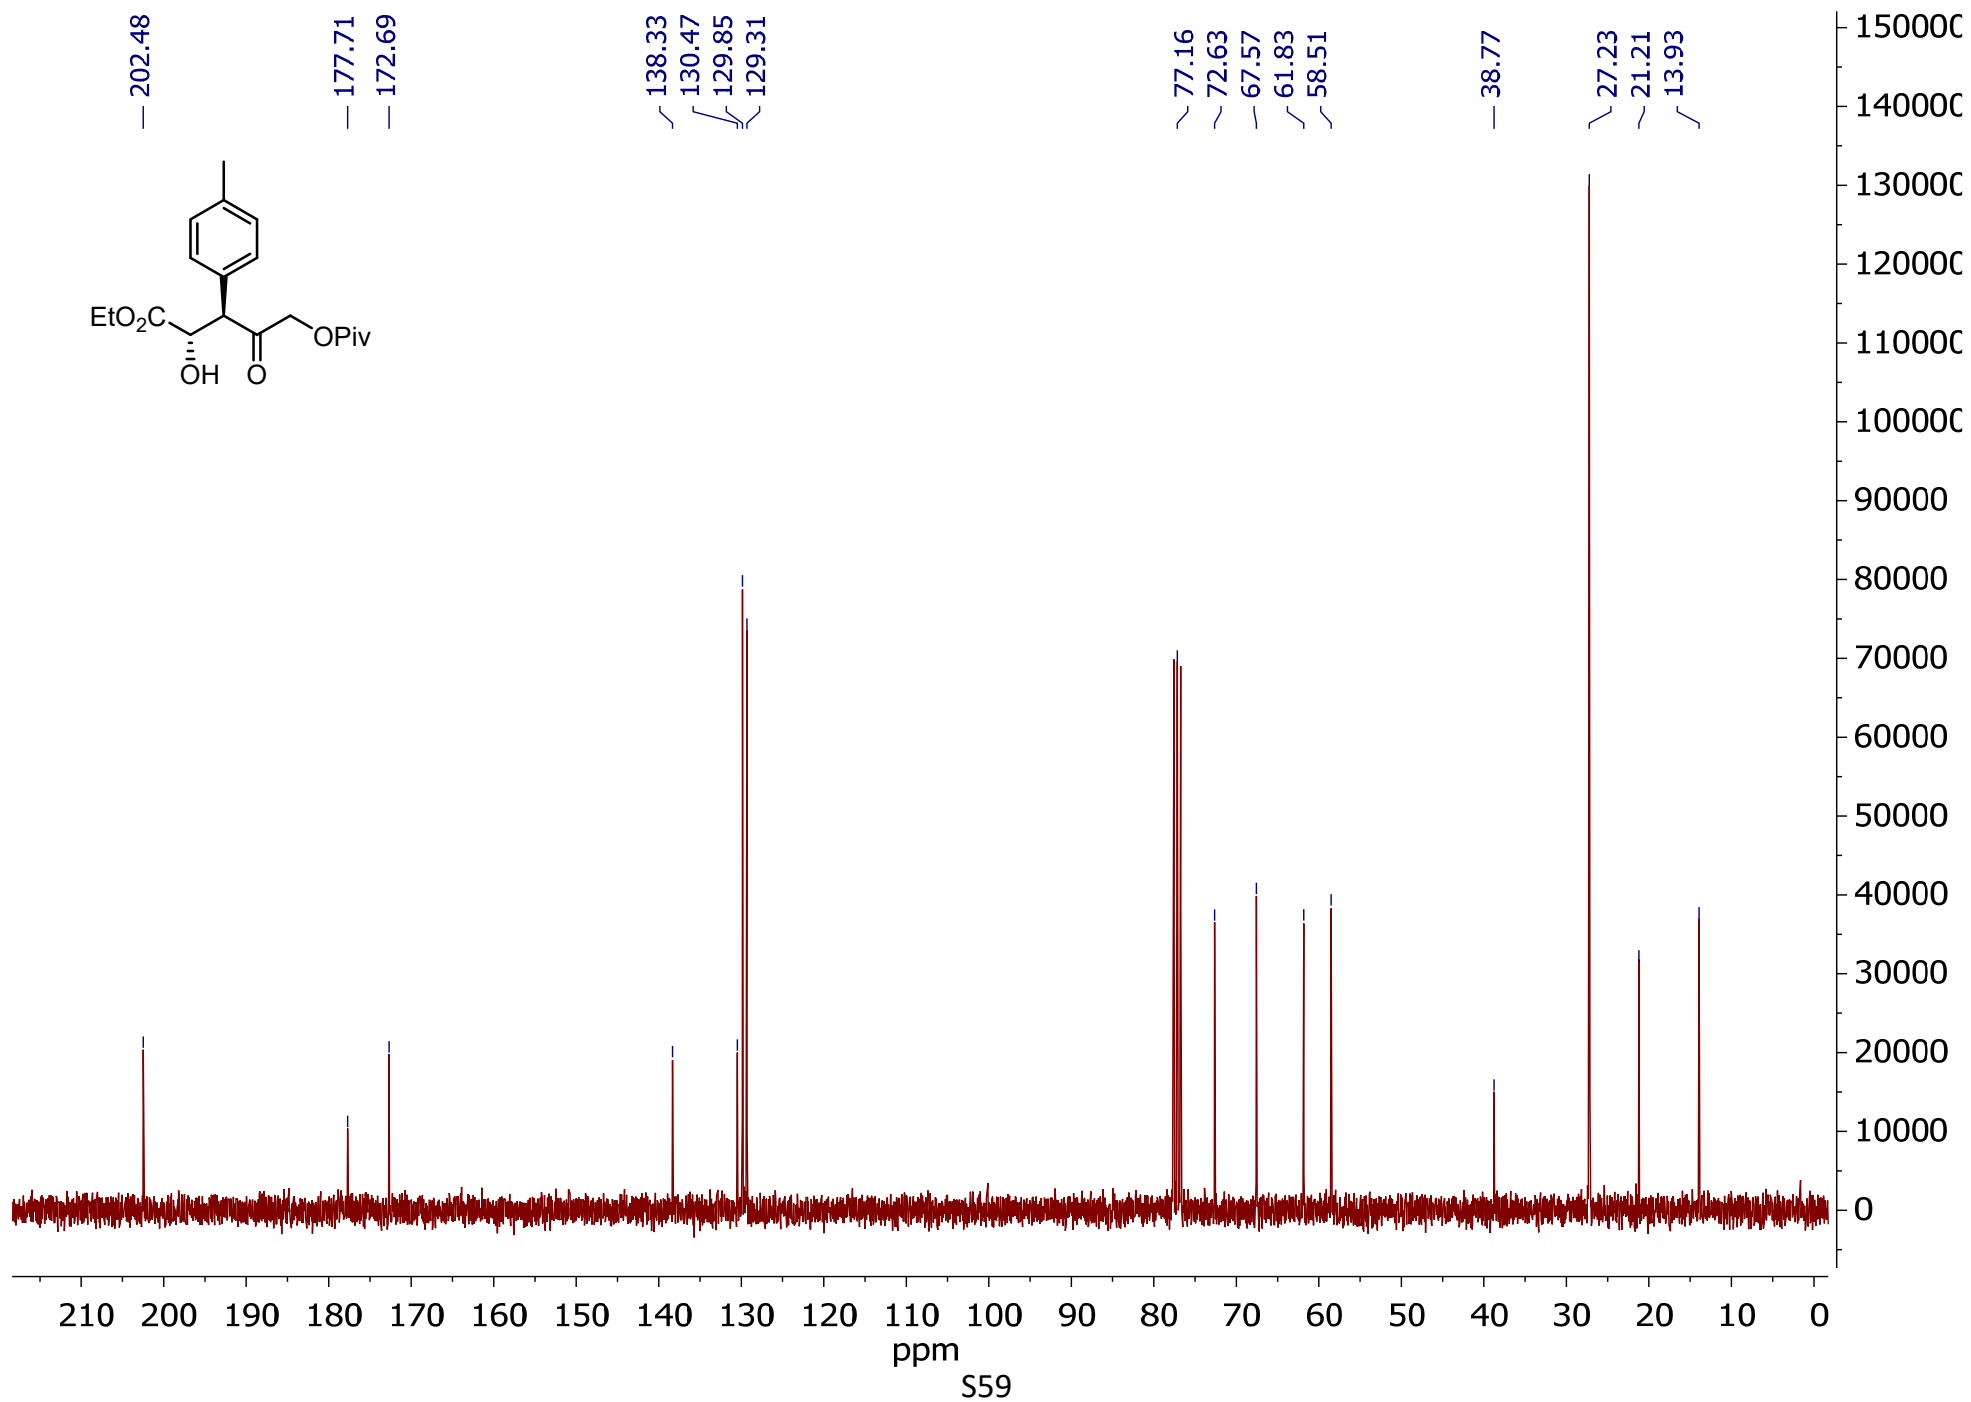

UPY791.100.{13C}deptsp135/3  
/ILD T UPY791.100

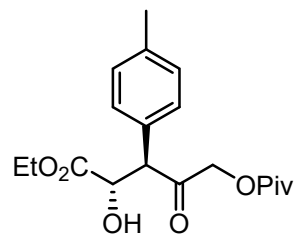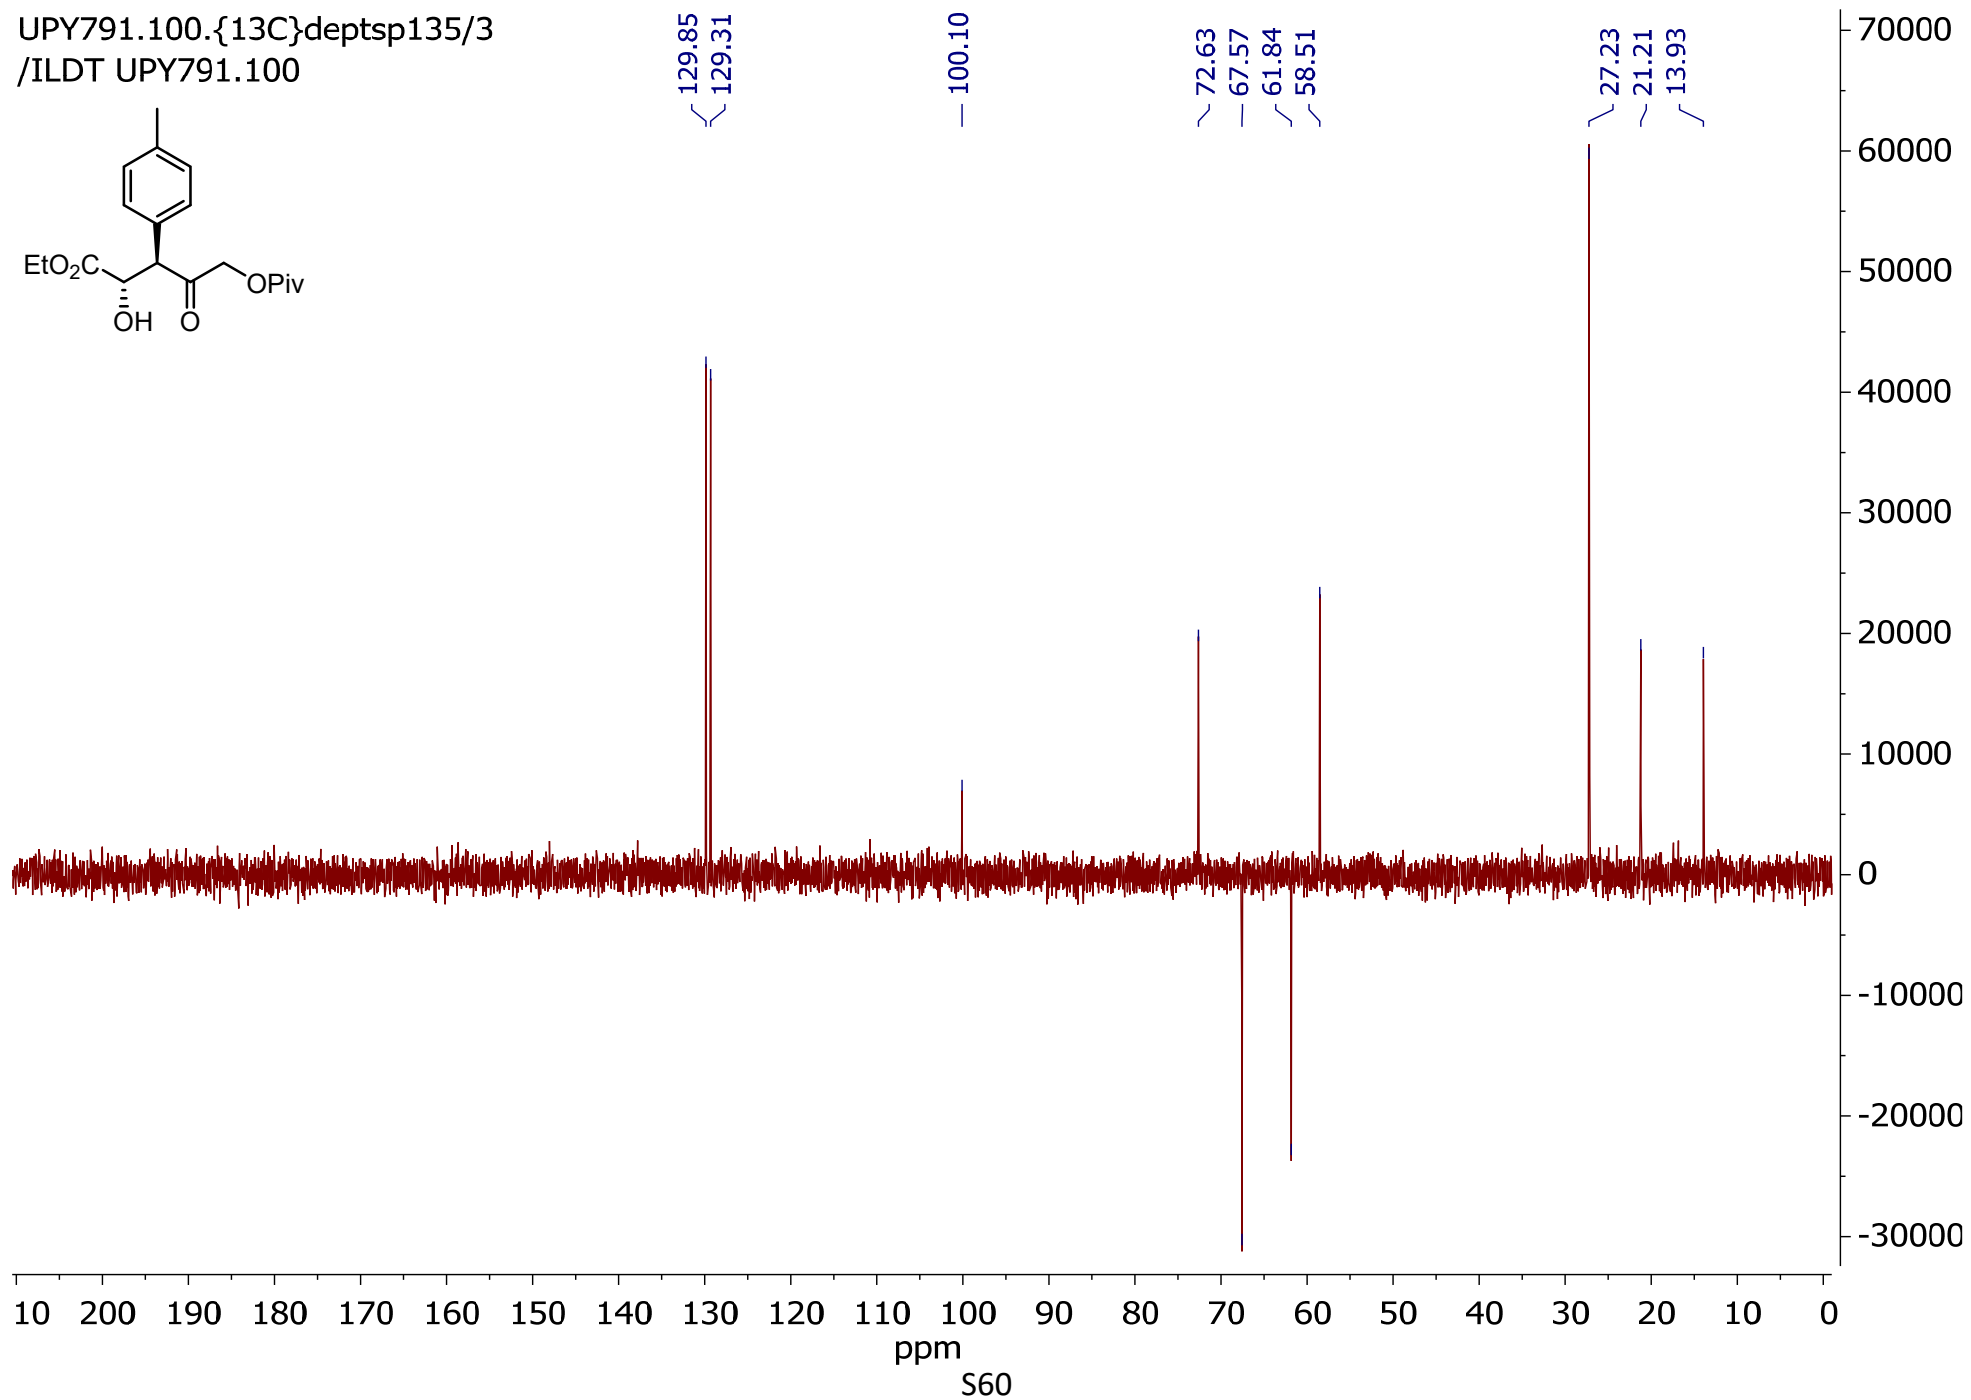



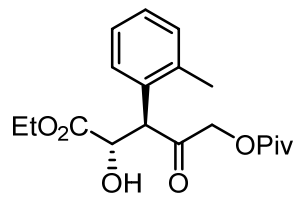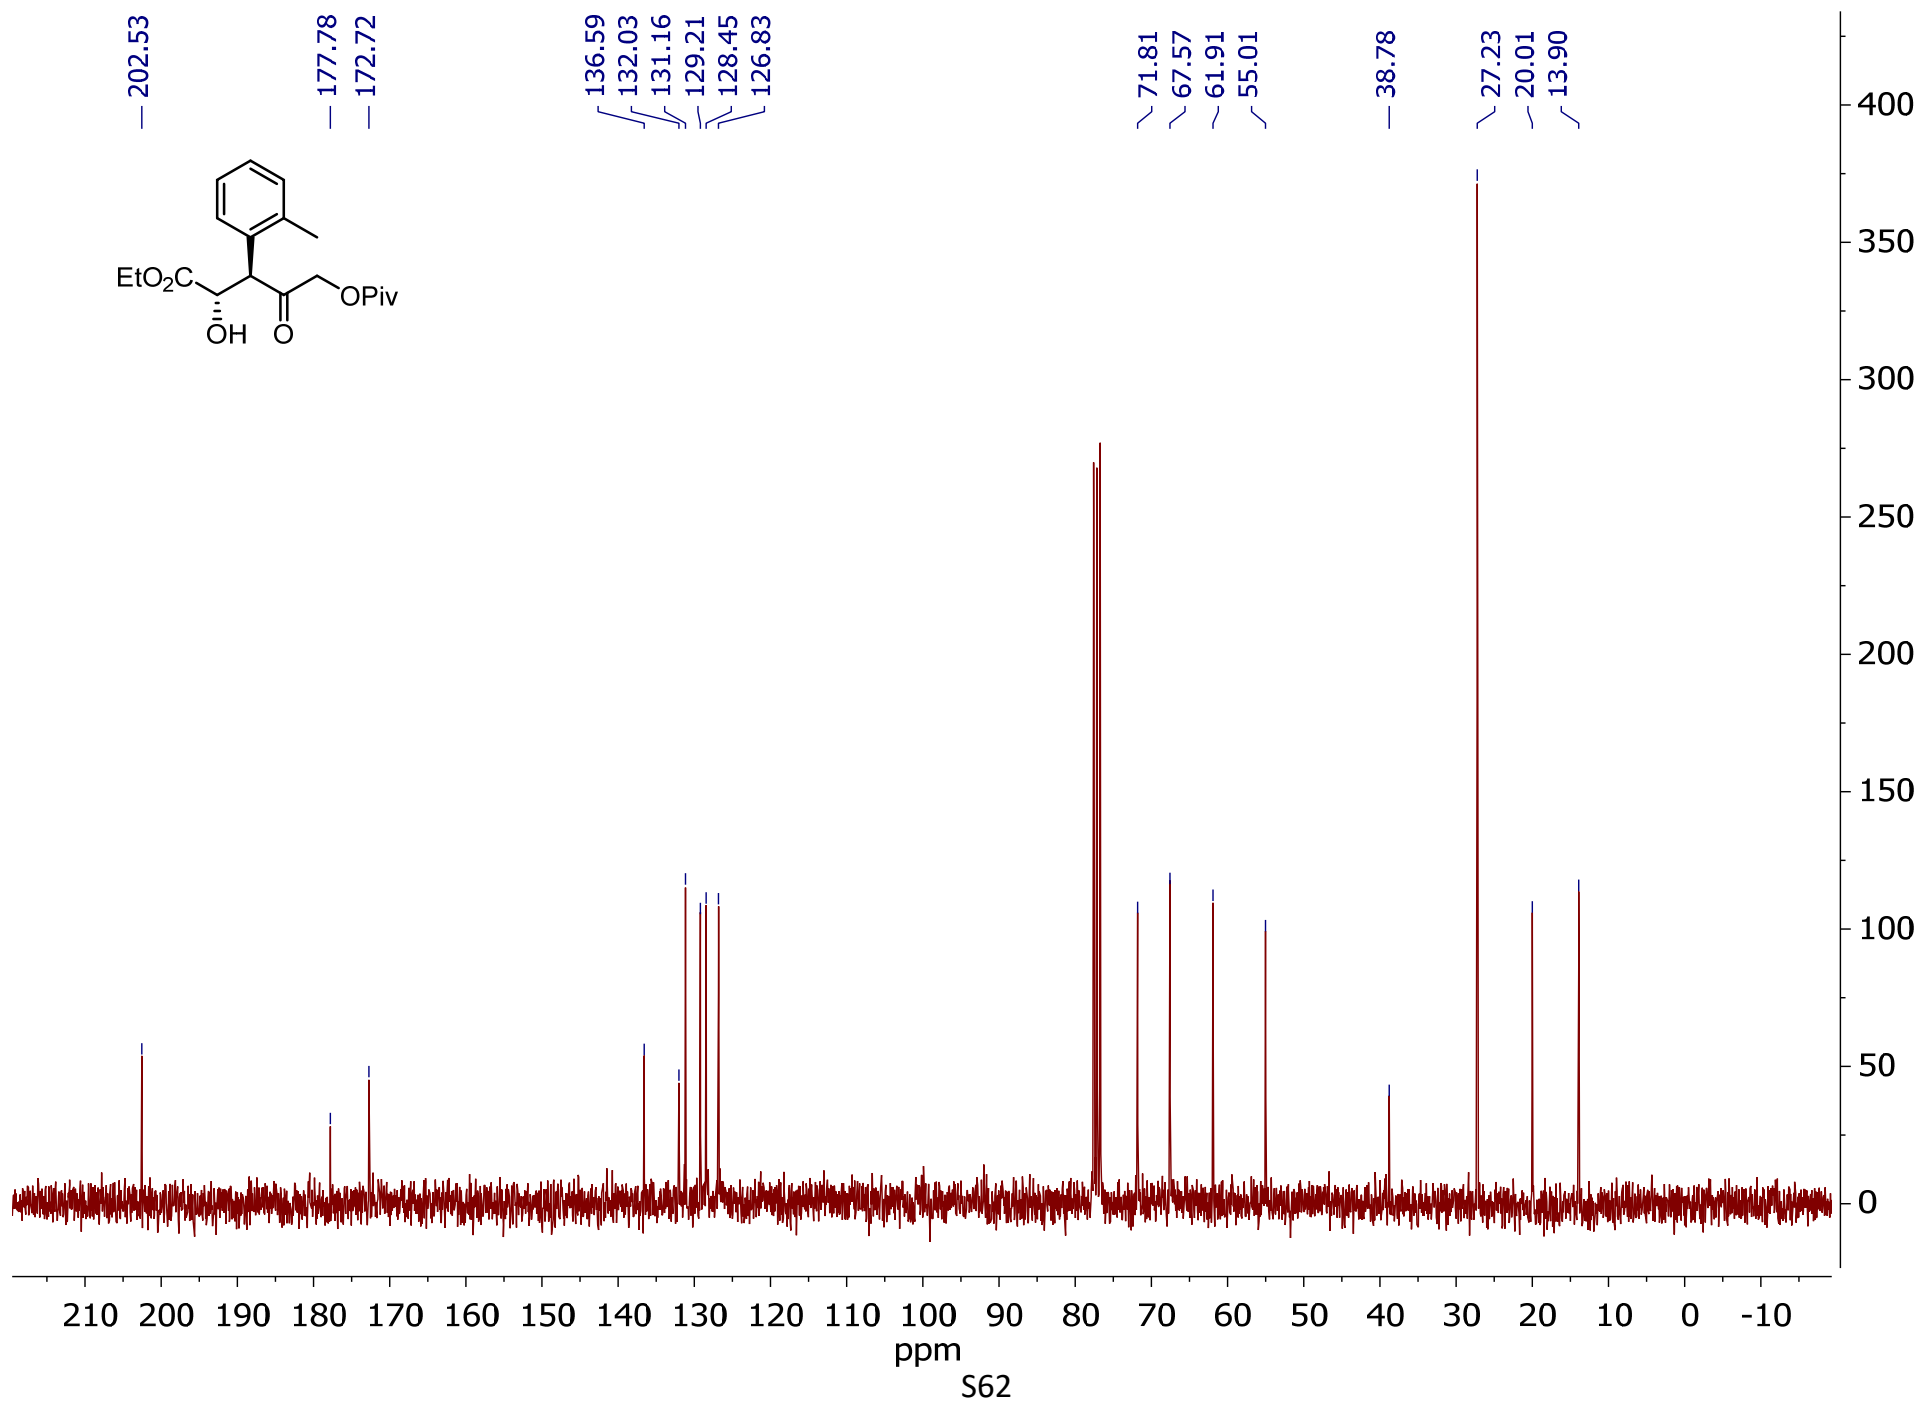

UPY806.100.{13C}depts135/3  
/ILD T UPY806.100 Suhorukov-HD-37-21

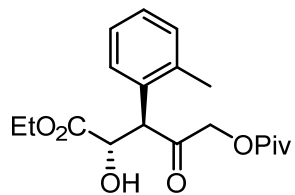

131.16  
129.21  
128.45  
126.83

71.80  
67.57  
61.91  
55.02

27.23  
20.01  
13.90

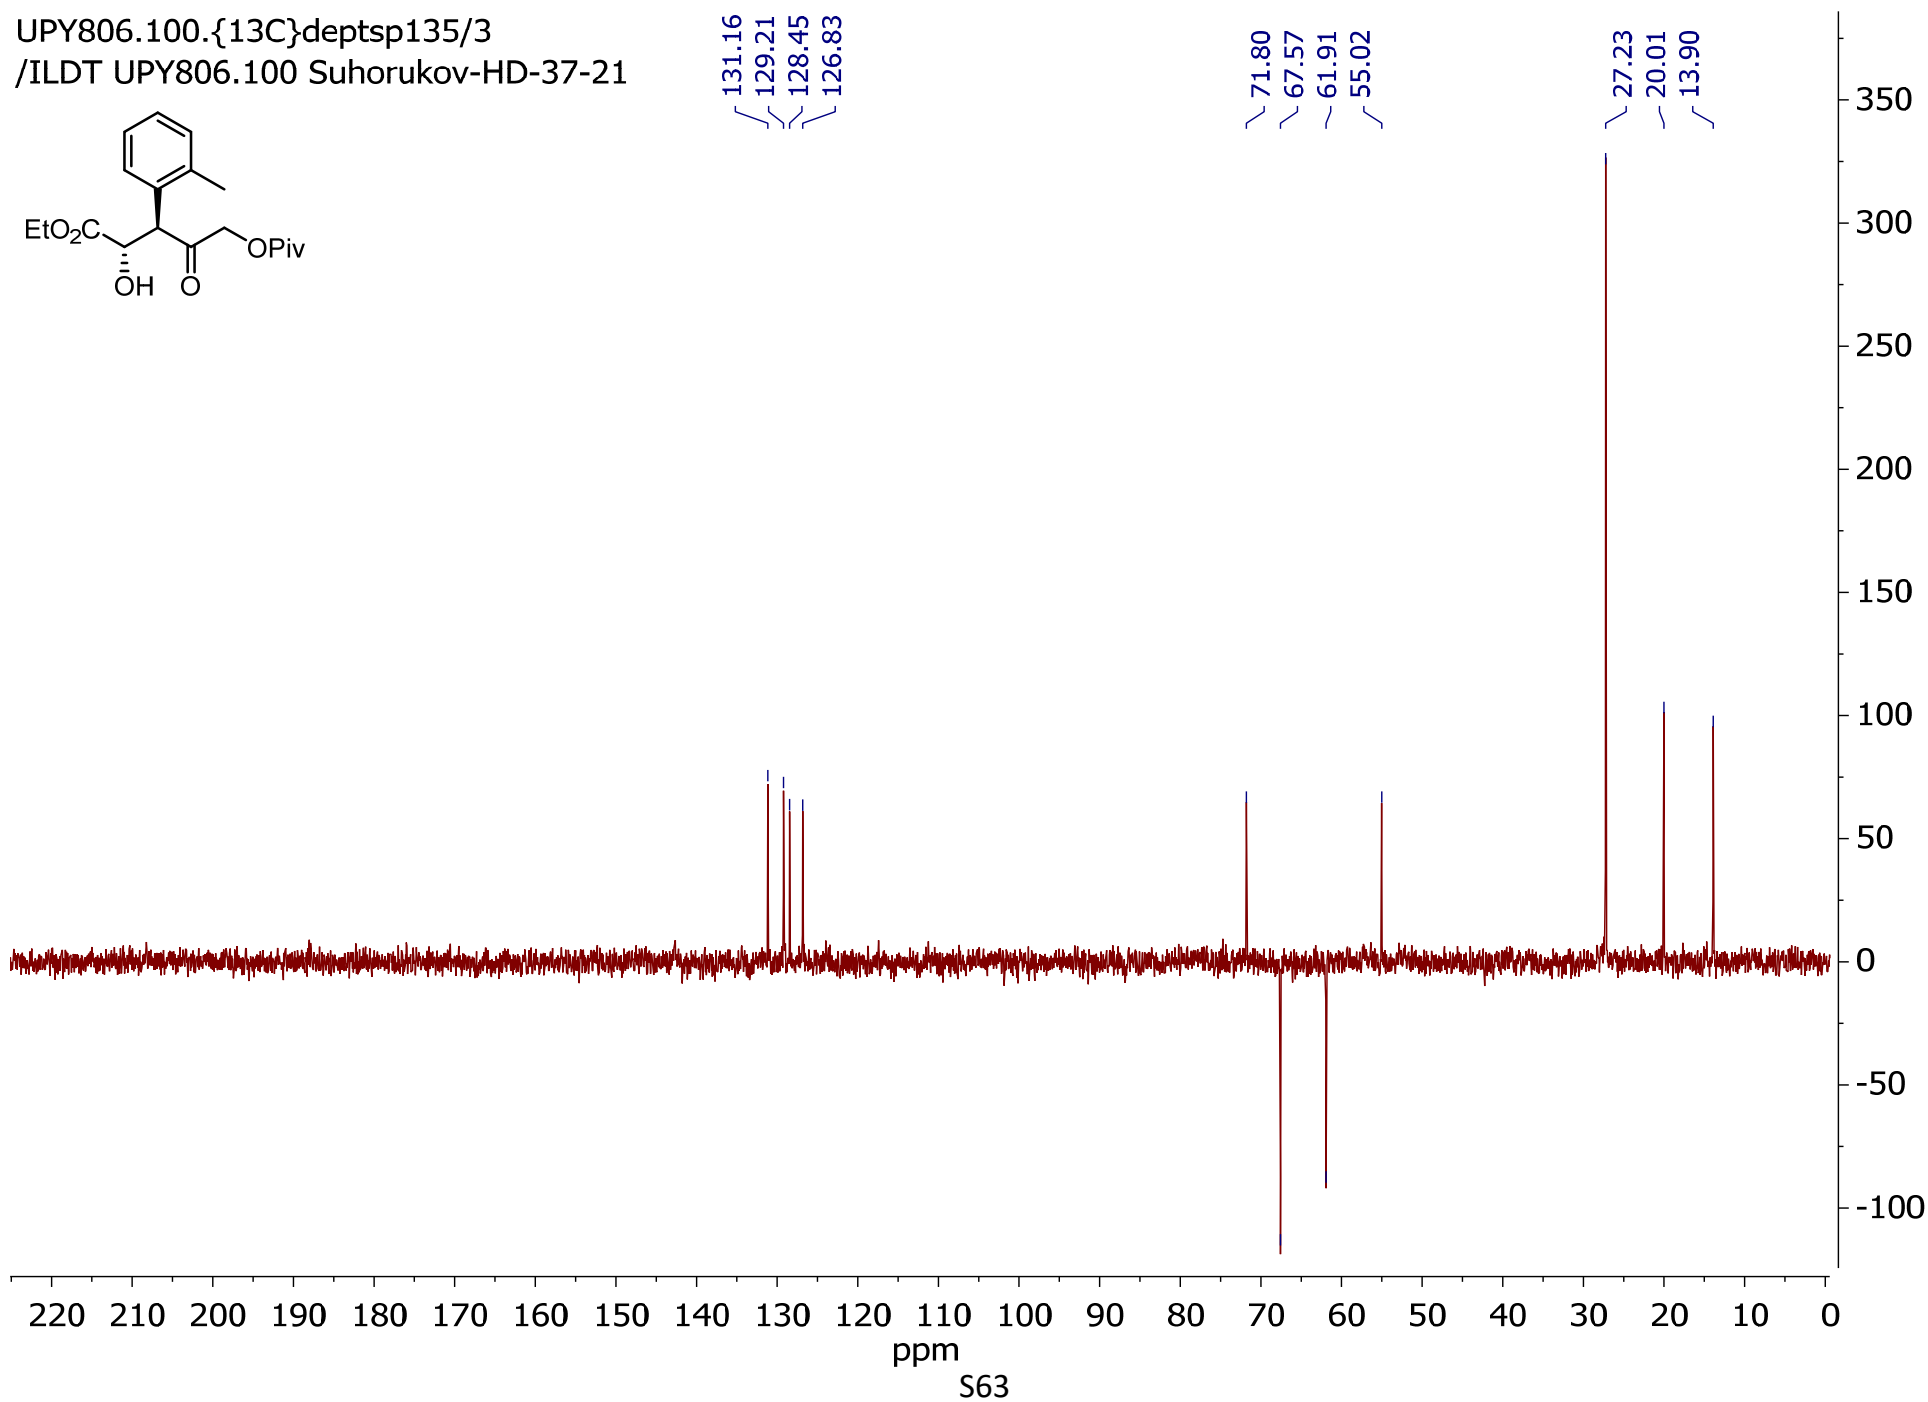

UPY762.200.{1H}/1  
/ILD T UPY762.200 Suhorukov-01411

### NMR spectra of 5f

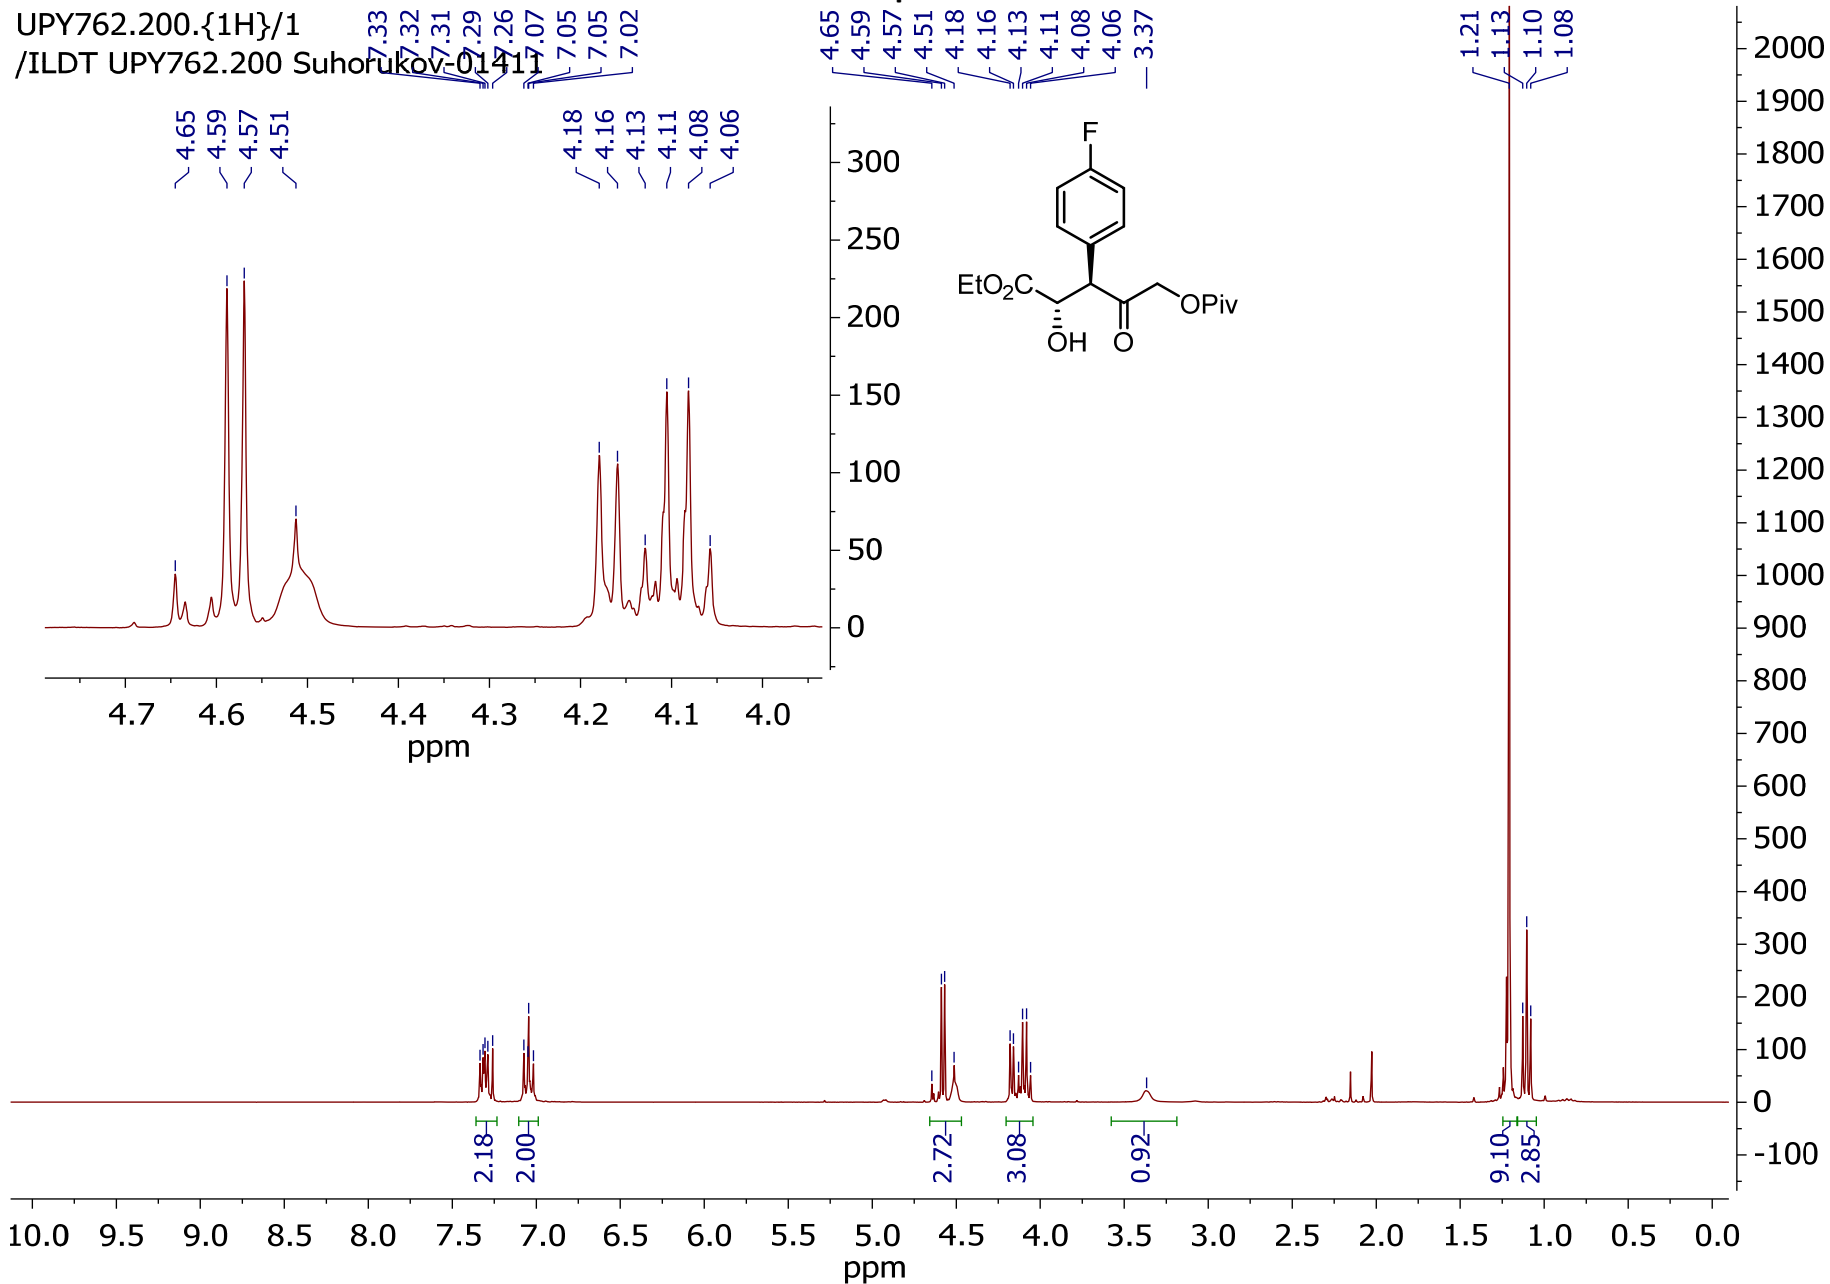



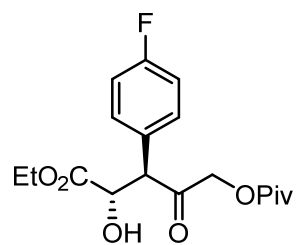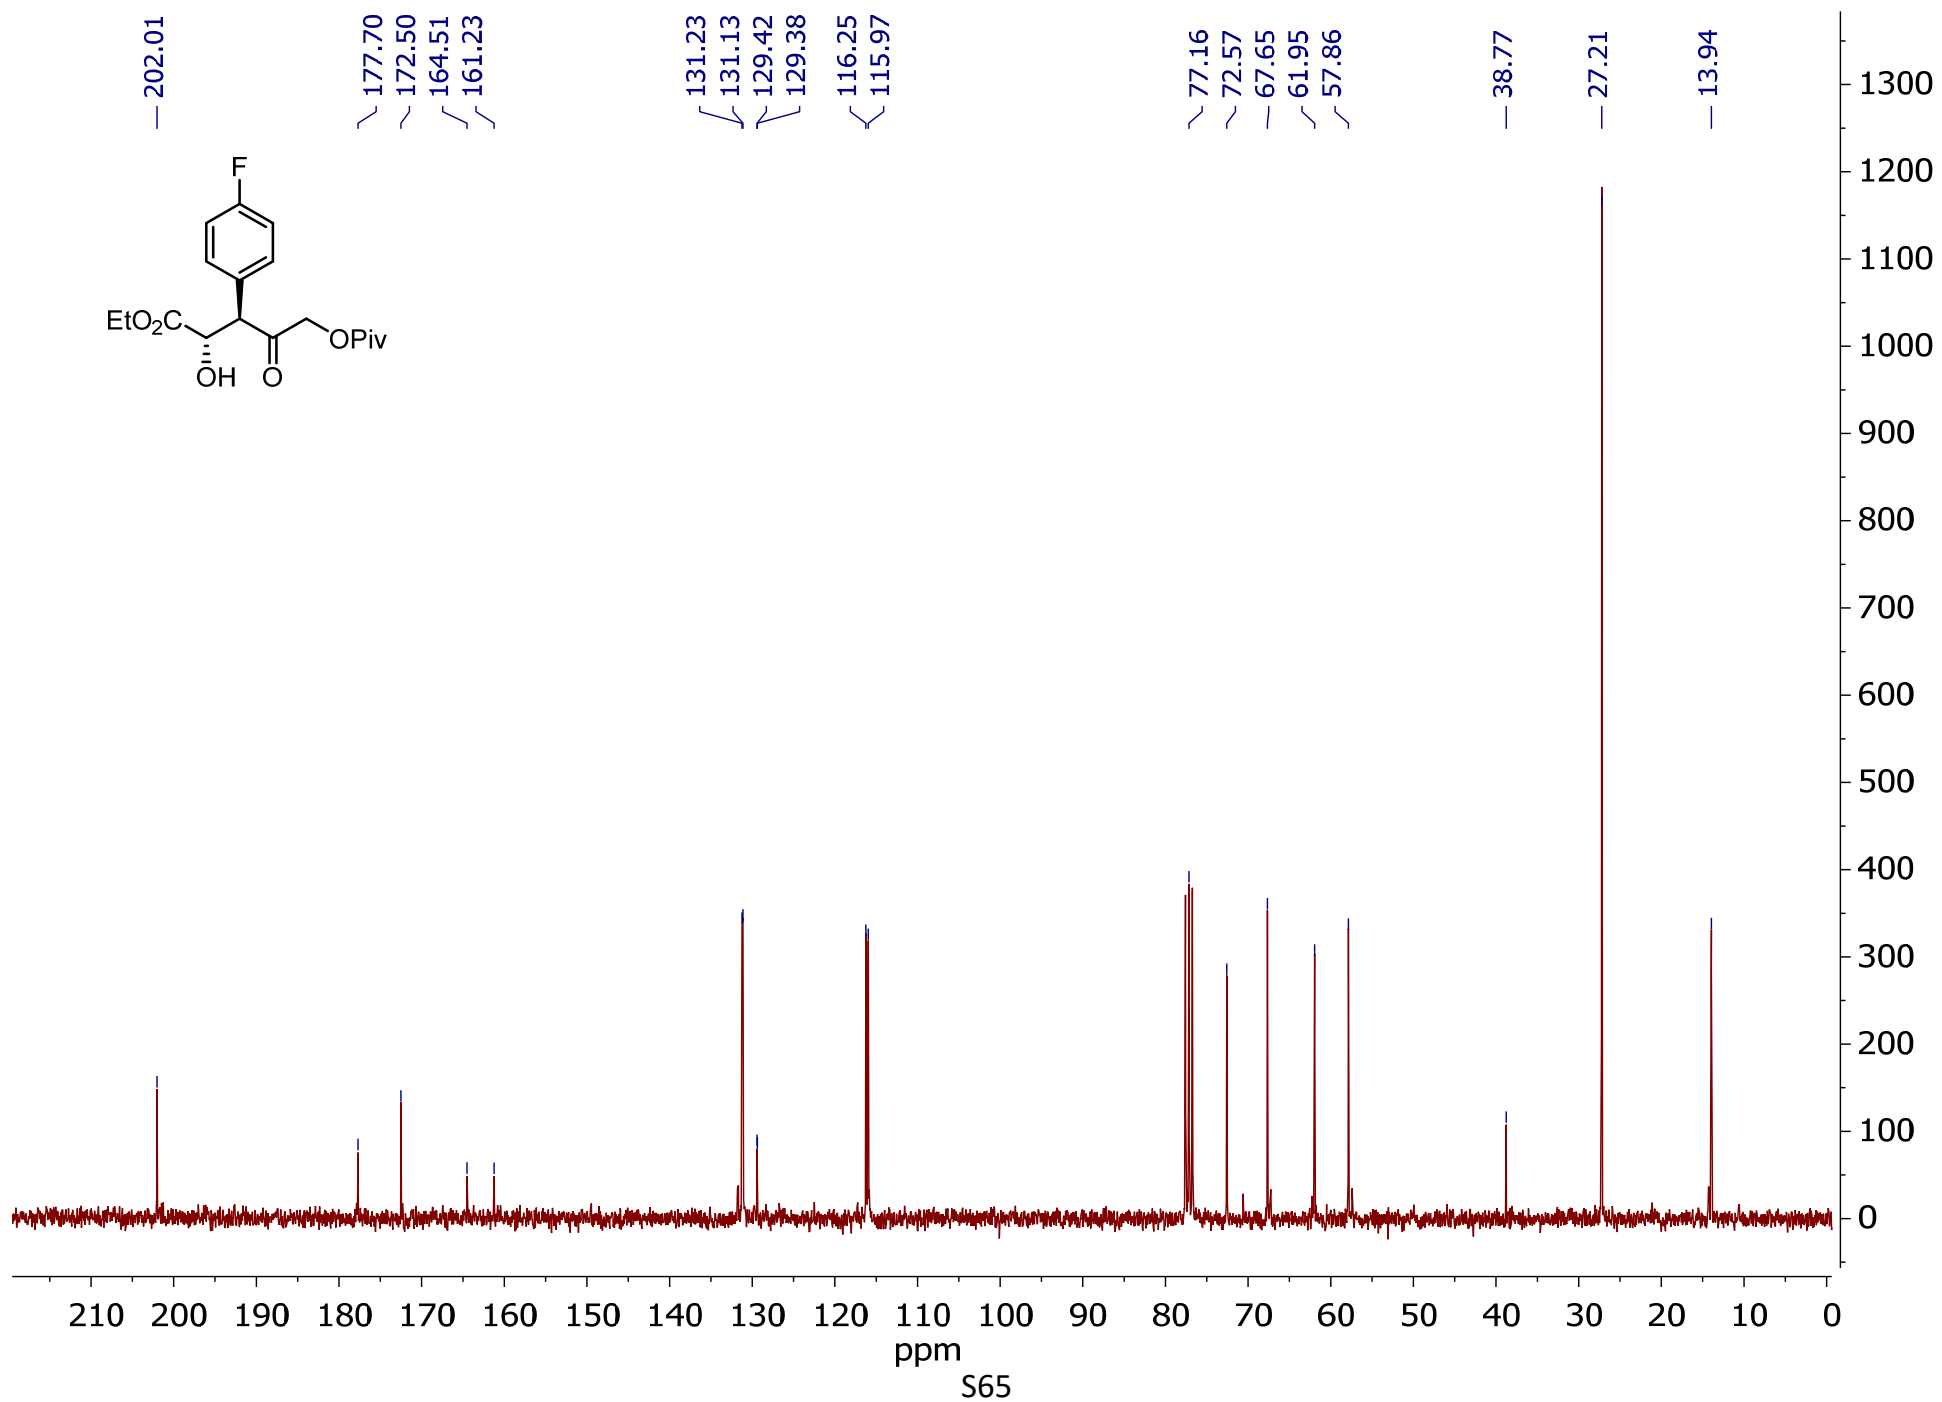

UPY762.200.{13C}deptsp135/3  
/ILDY UPY762.200 Suhorukov-01411

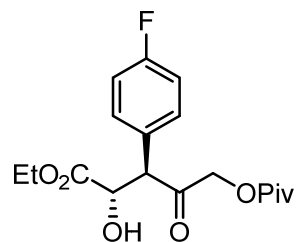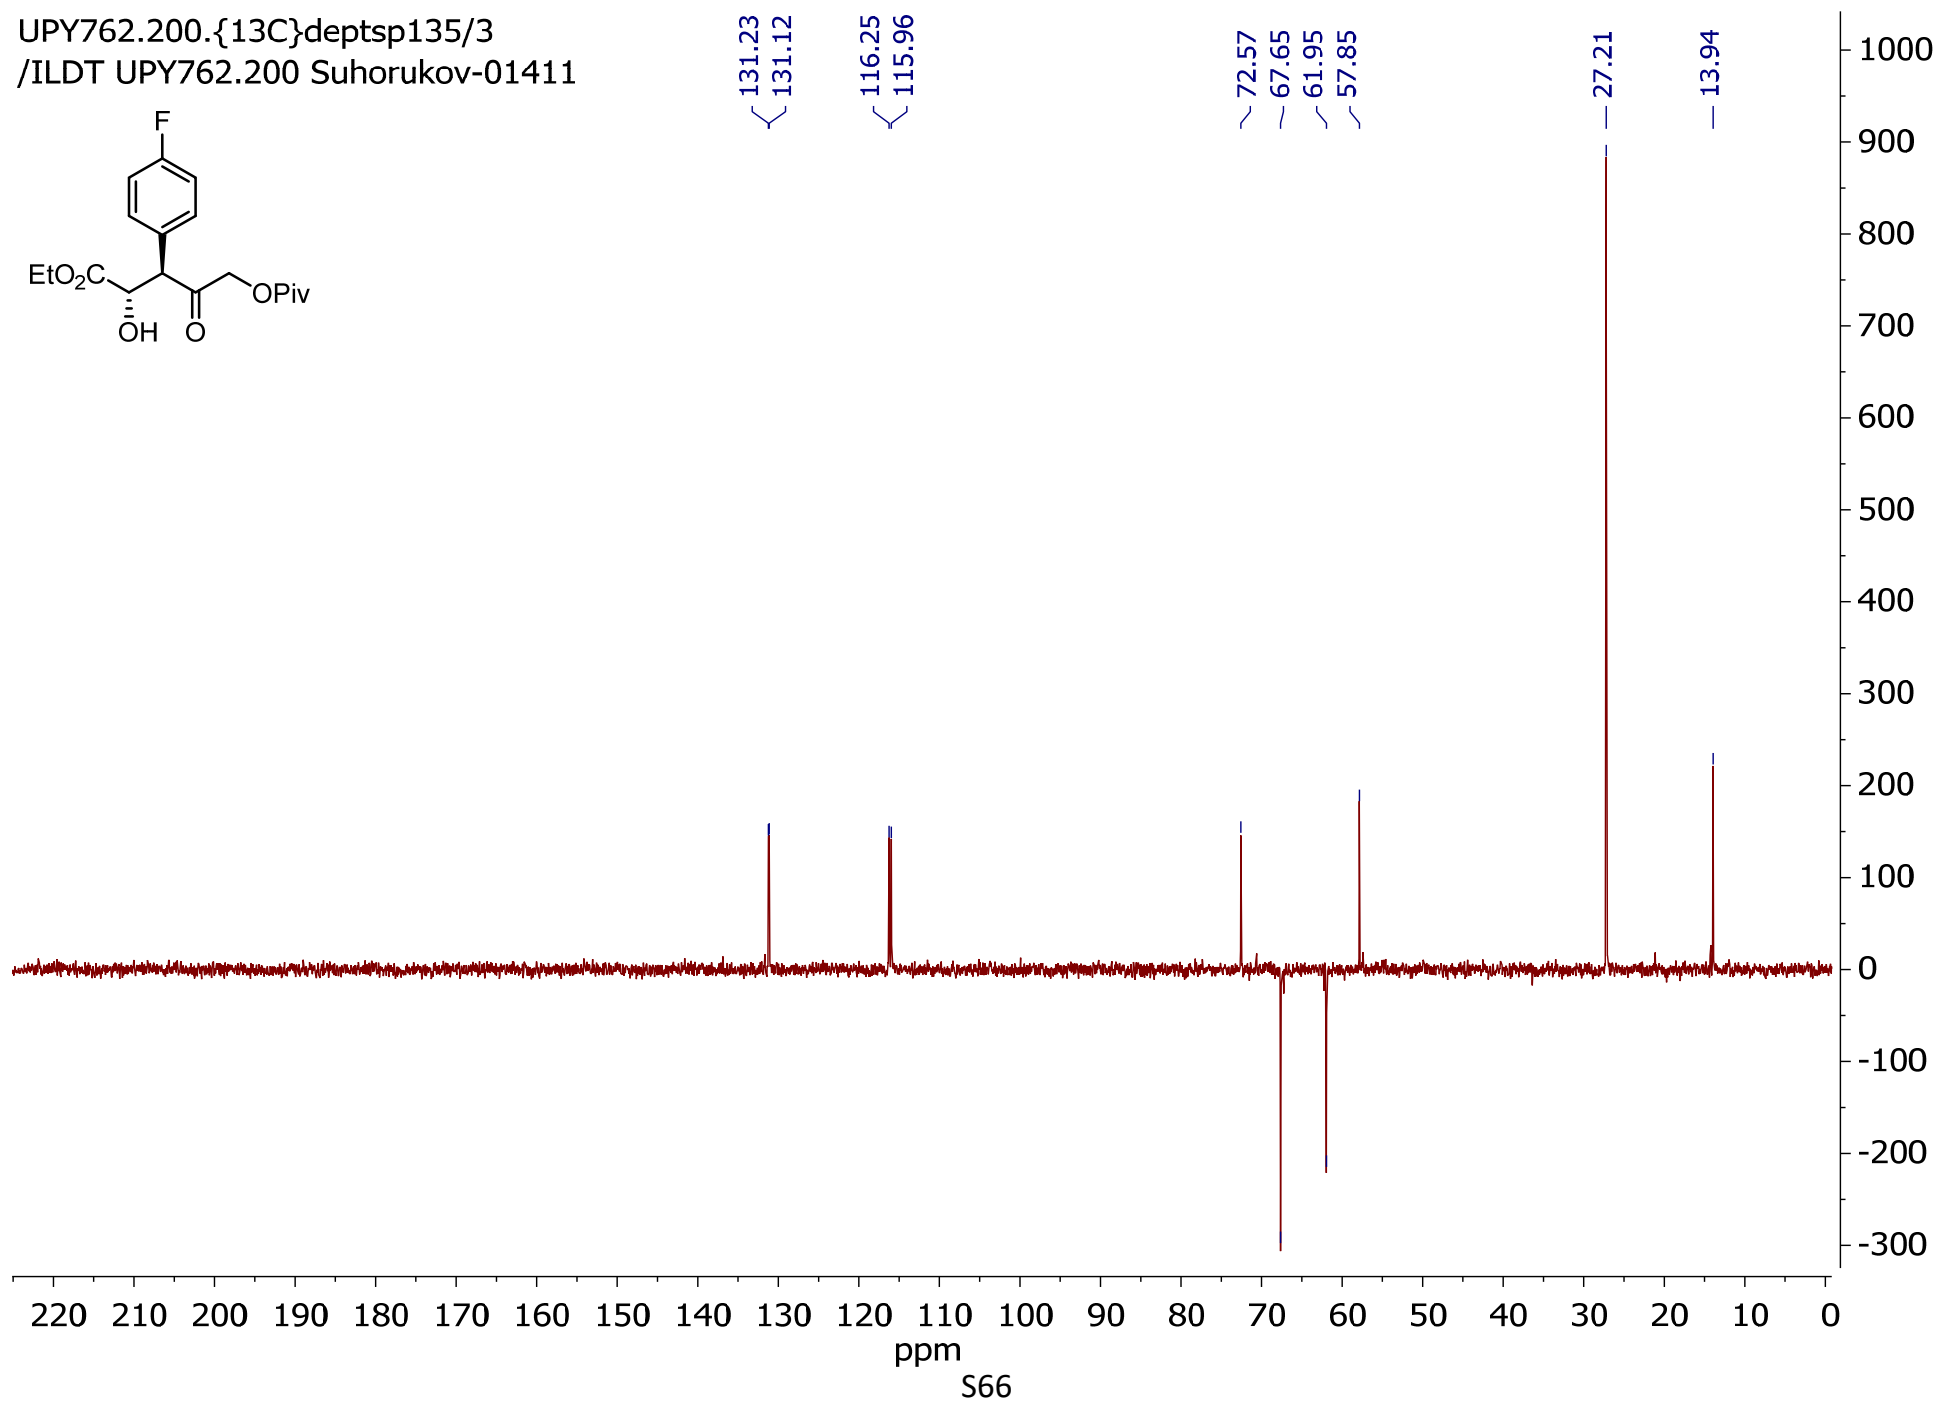

UPY762.119.{19F}/19  
NMR/50803835

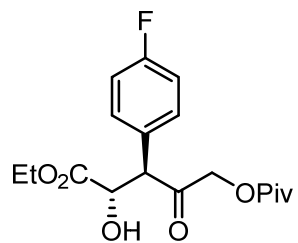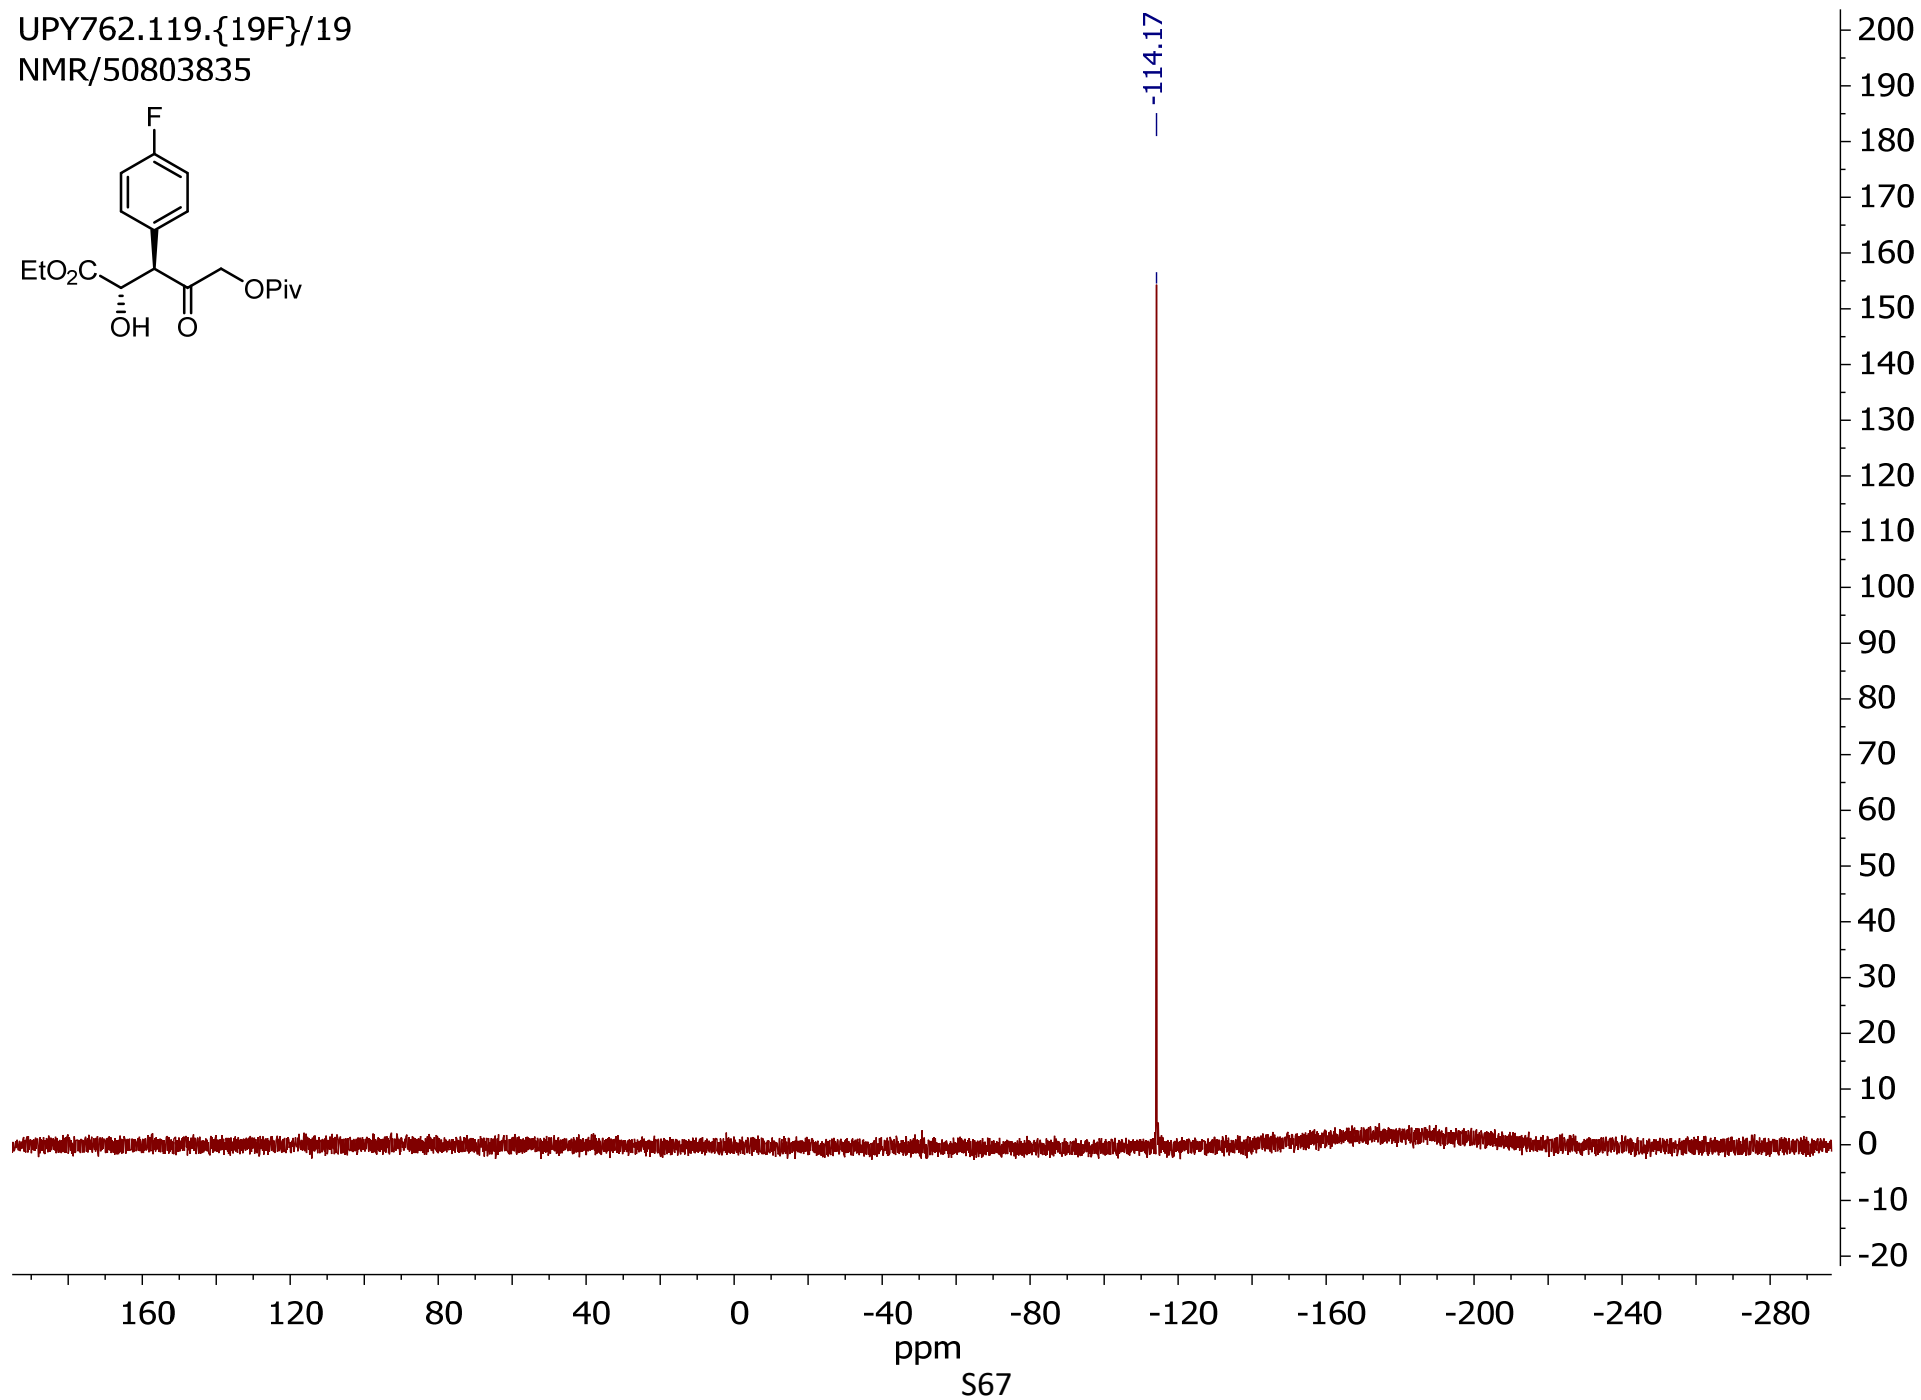

NMR spectra of 5g

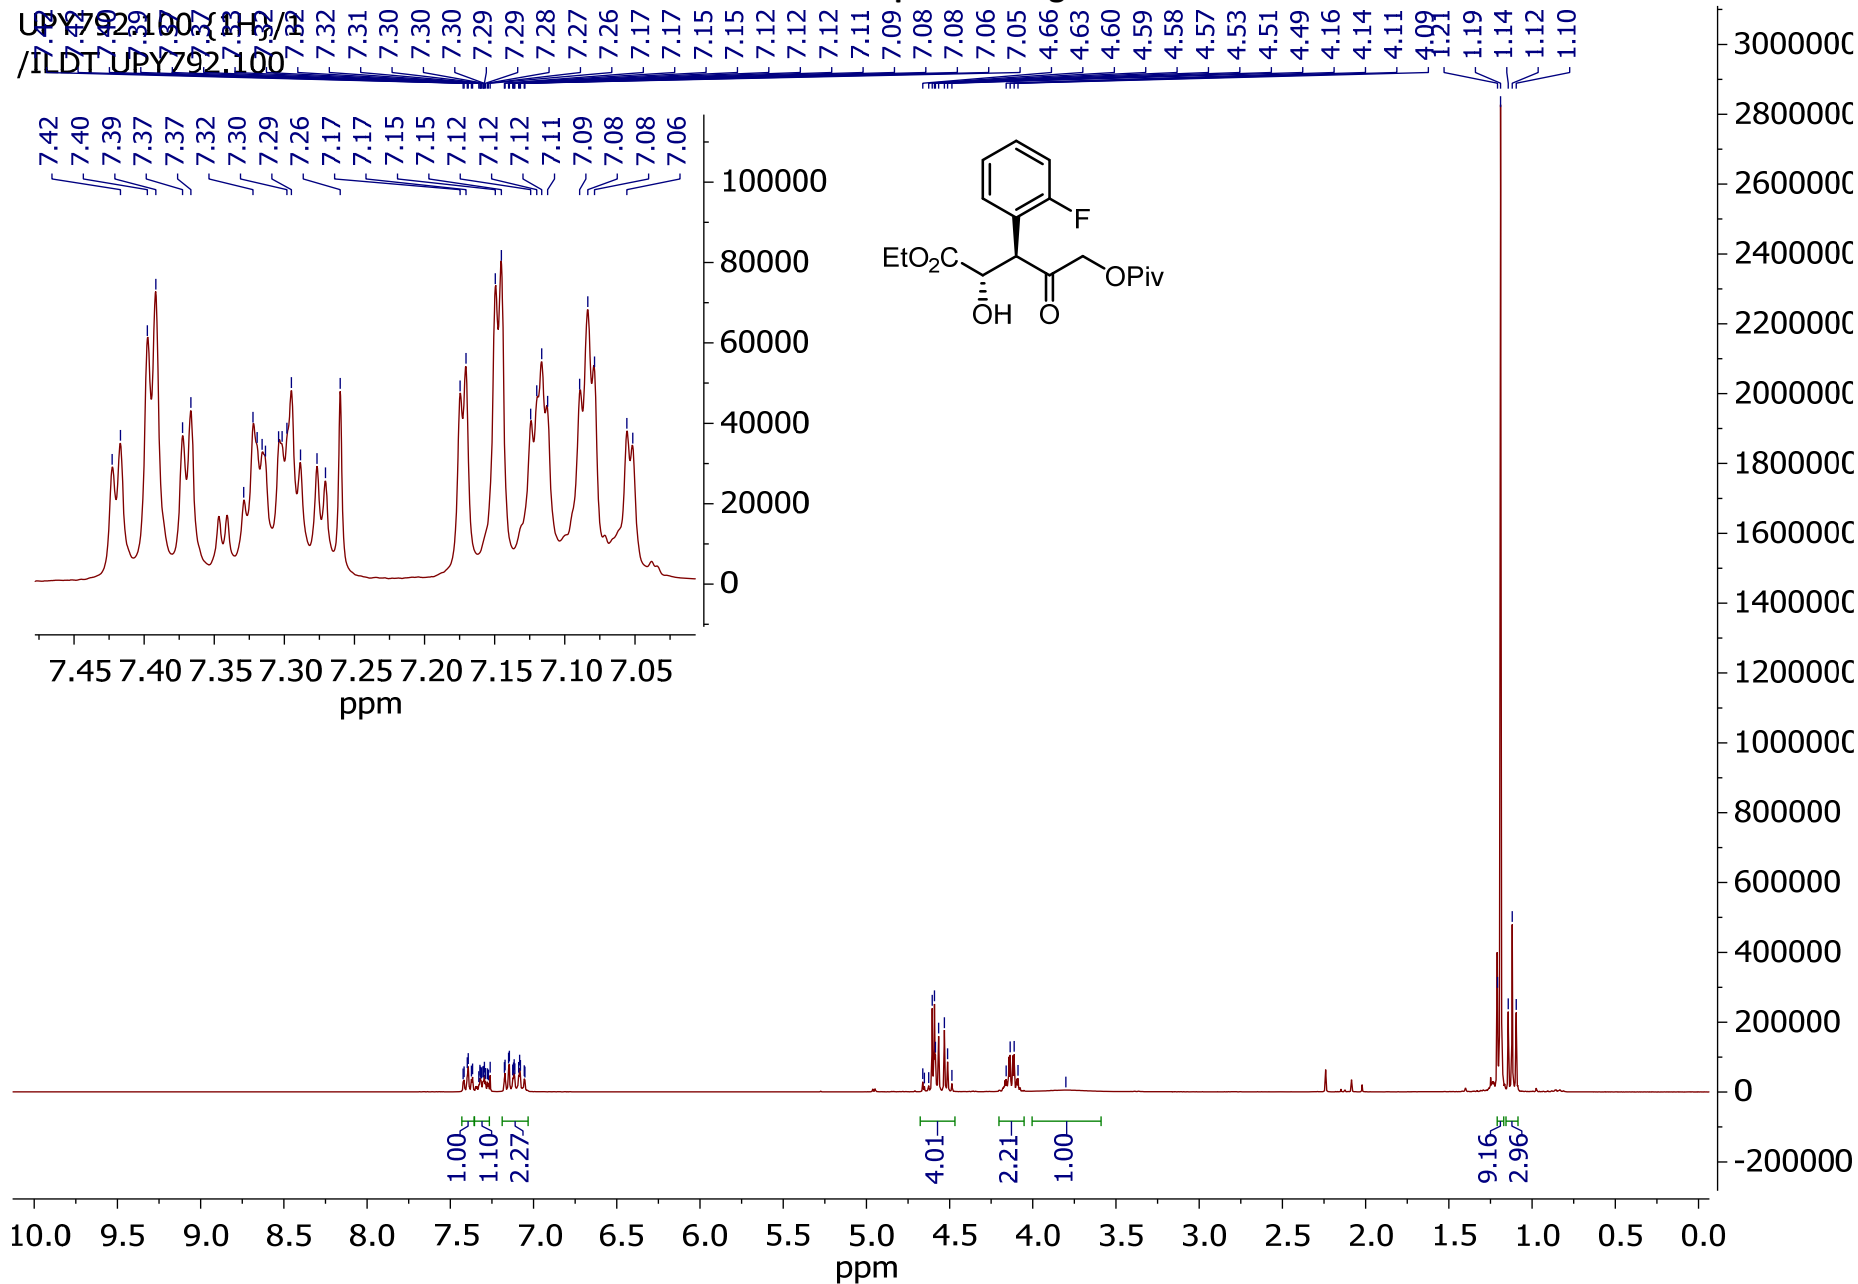

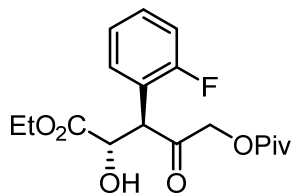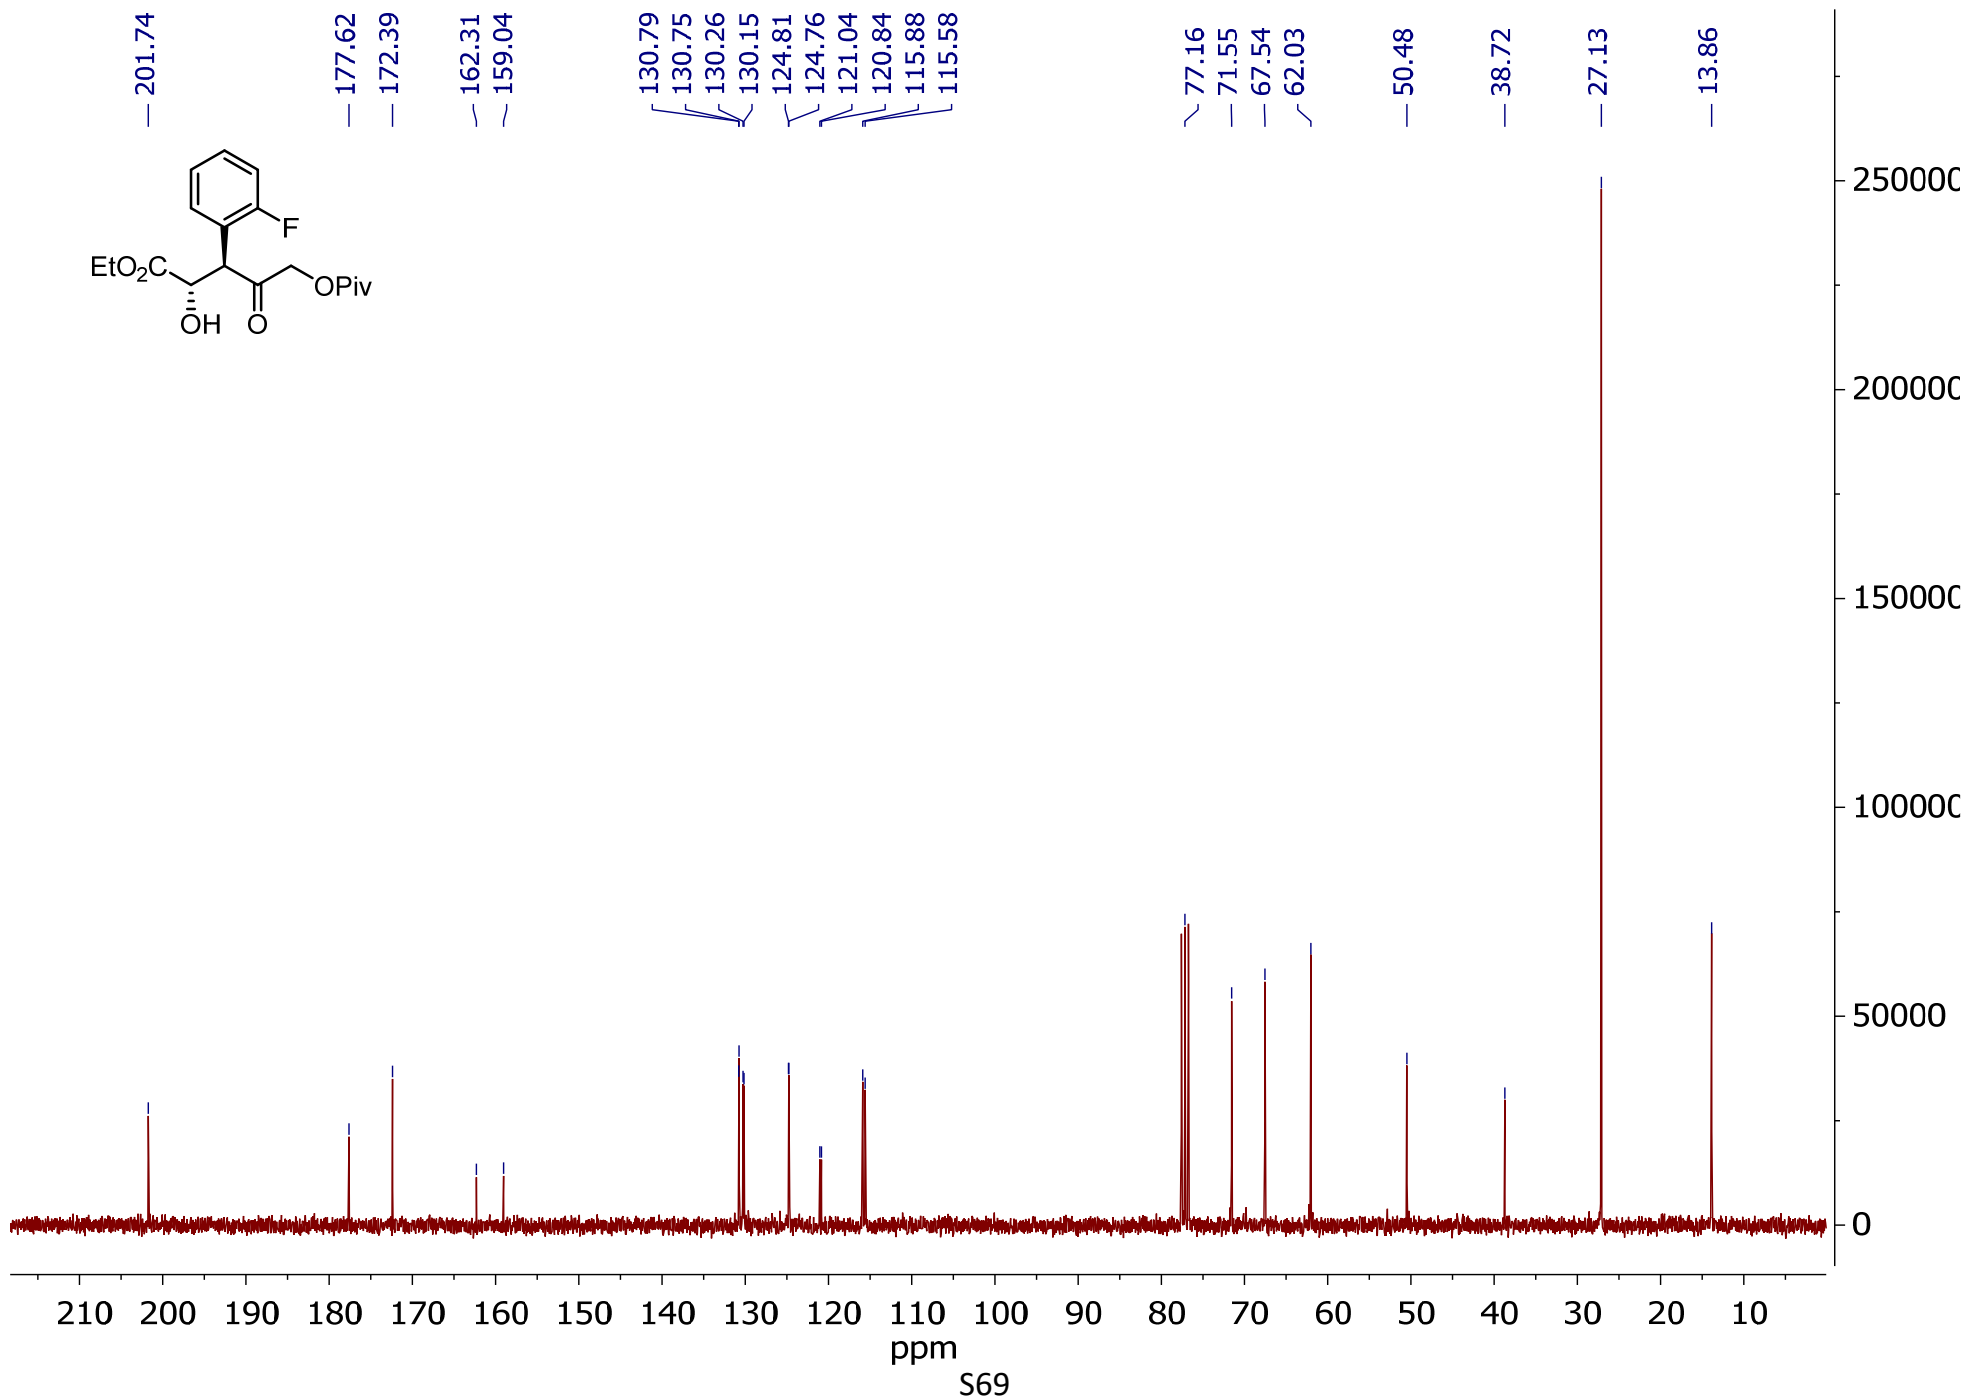

UPY792.100.{13C}depts135/3  
/ILD T UPY792.100

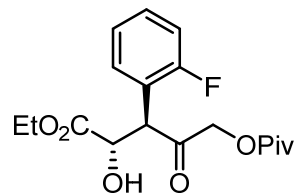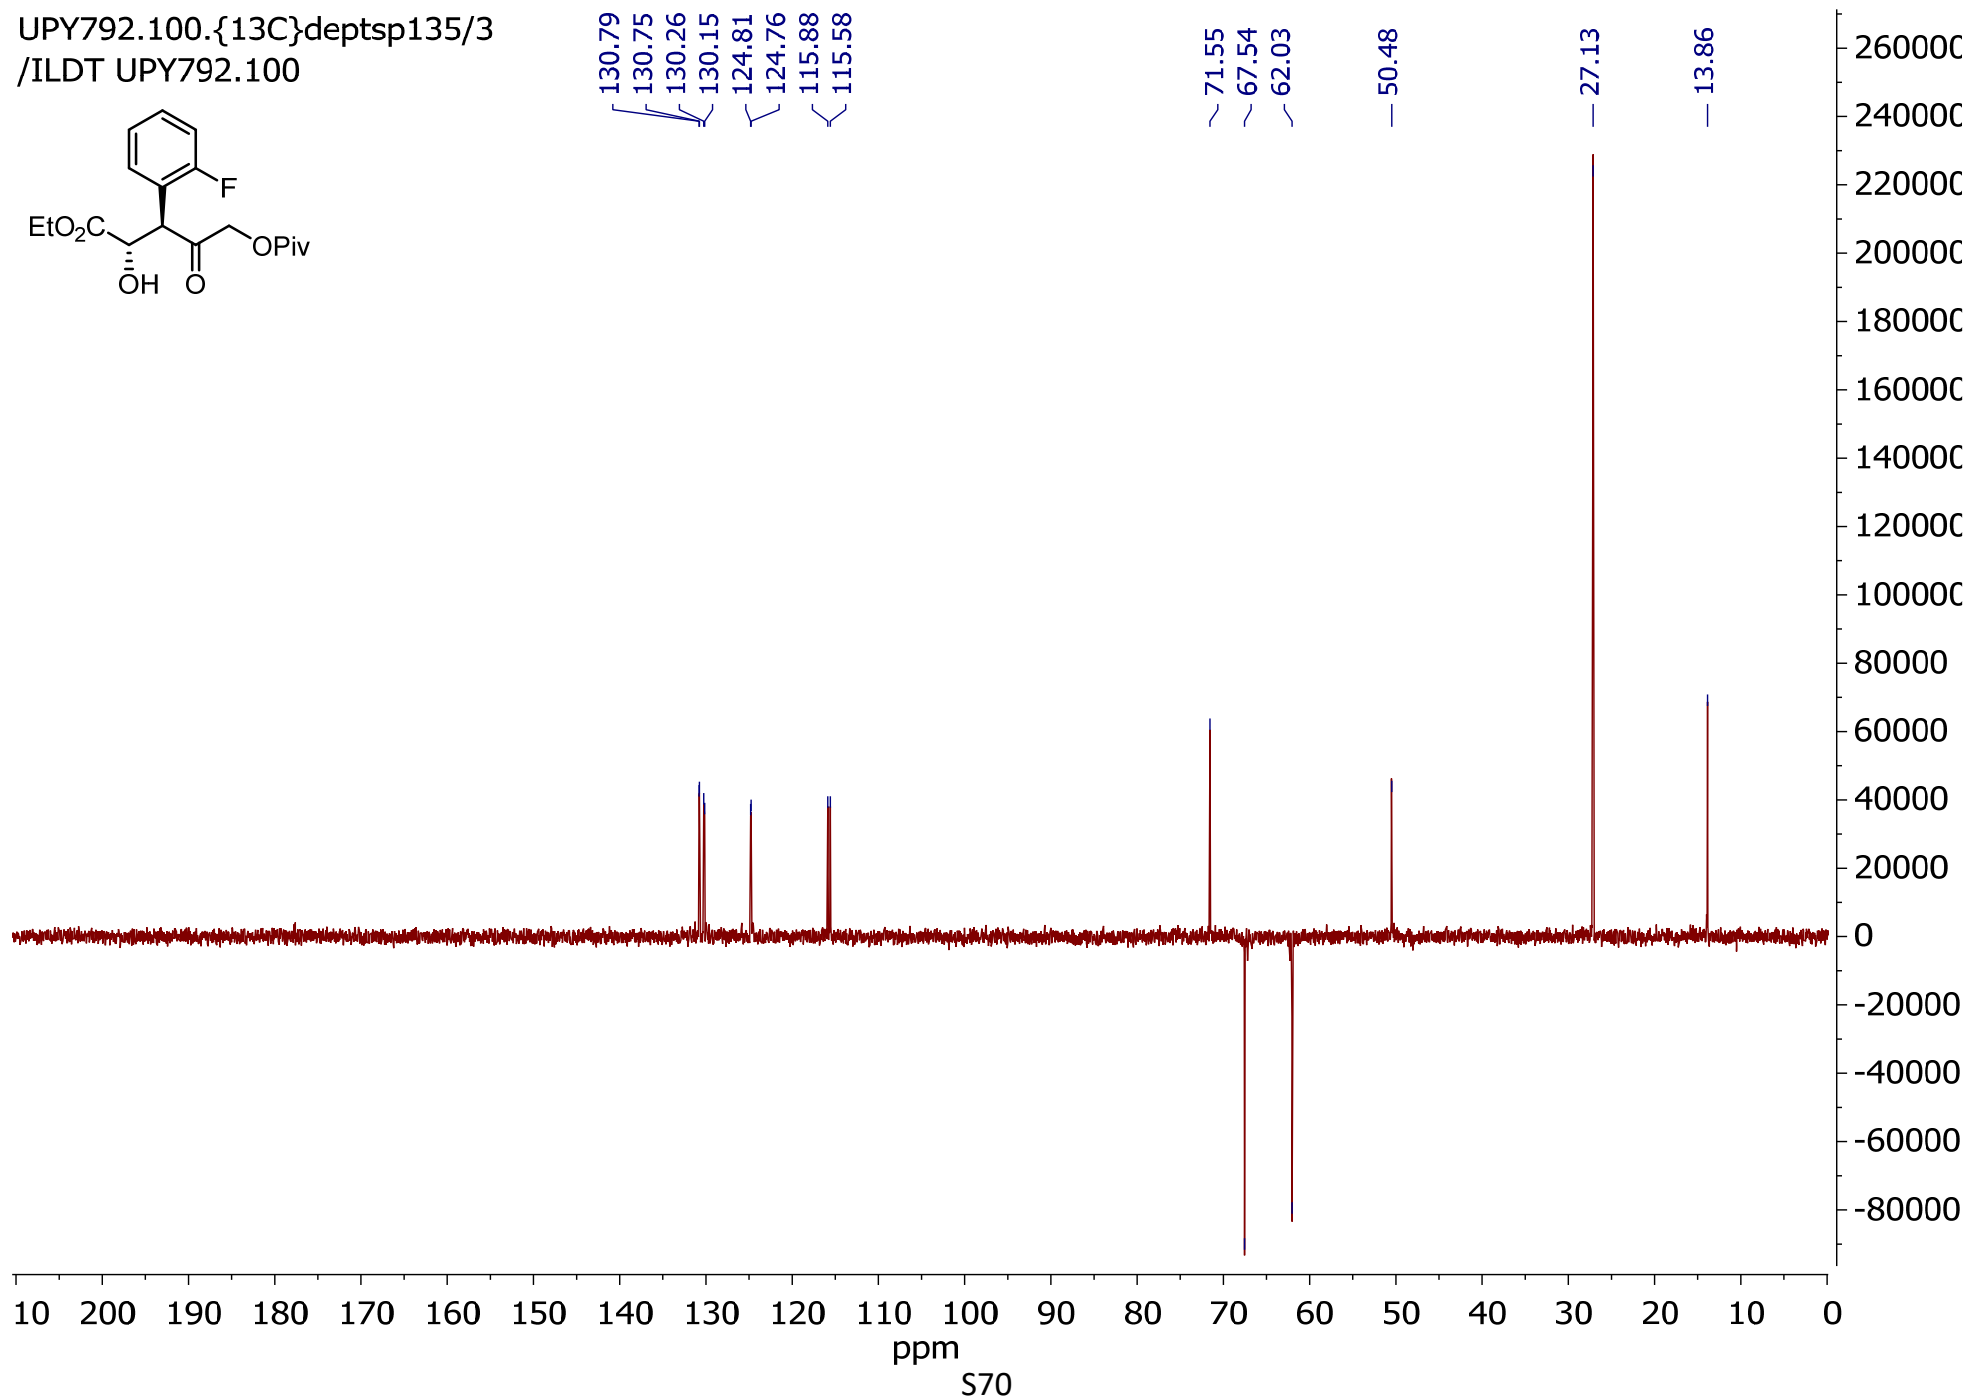

UPY792.100.{19F}/19  
/ILD T UPY792.100

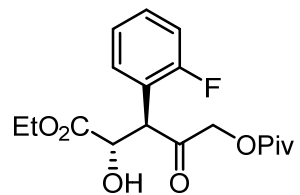

-117.08  
-117.10  
-117.11  
-117.12  
-117.13  
-117.13  
-117.14  
-117.16

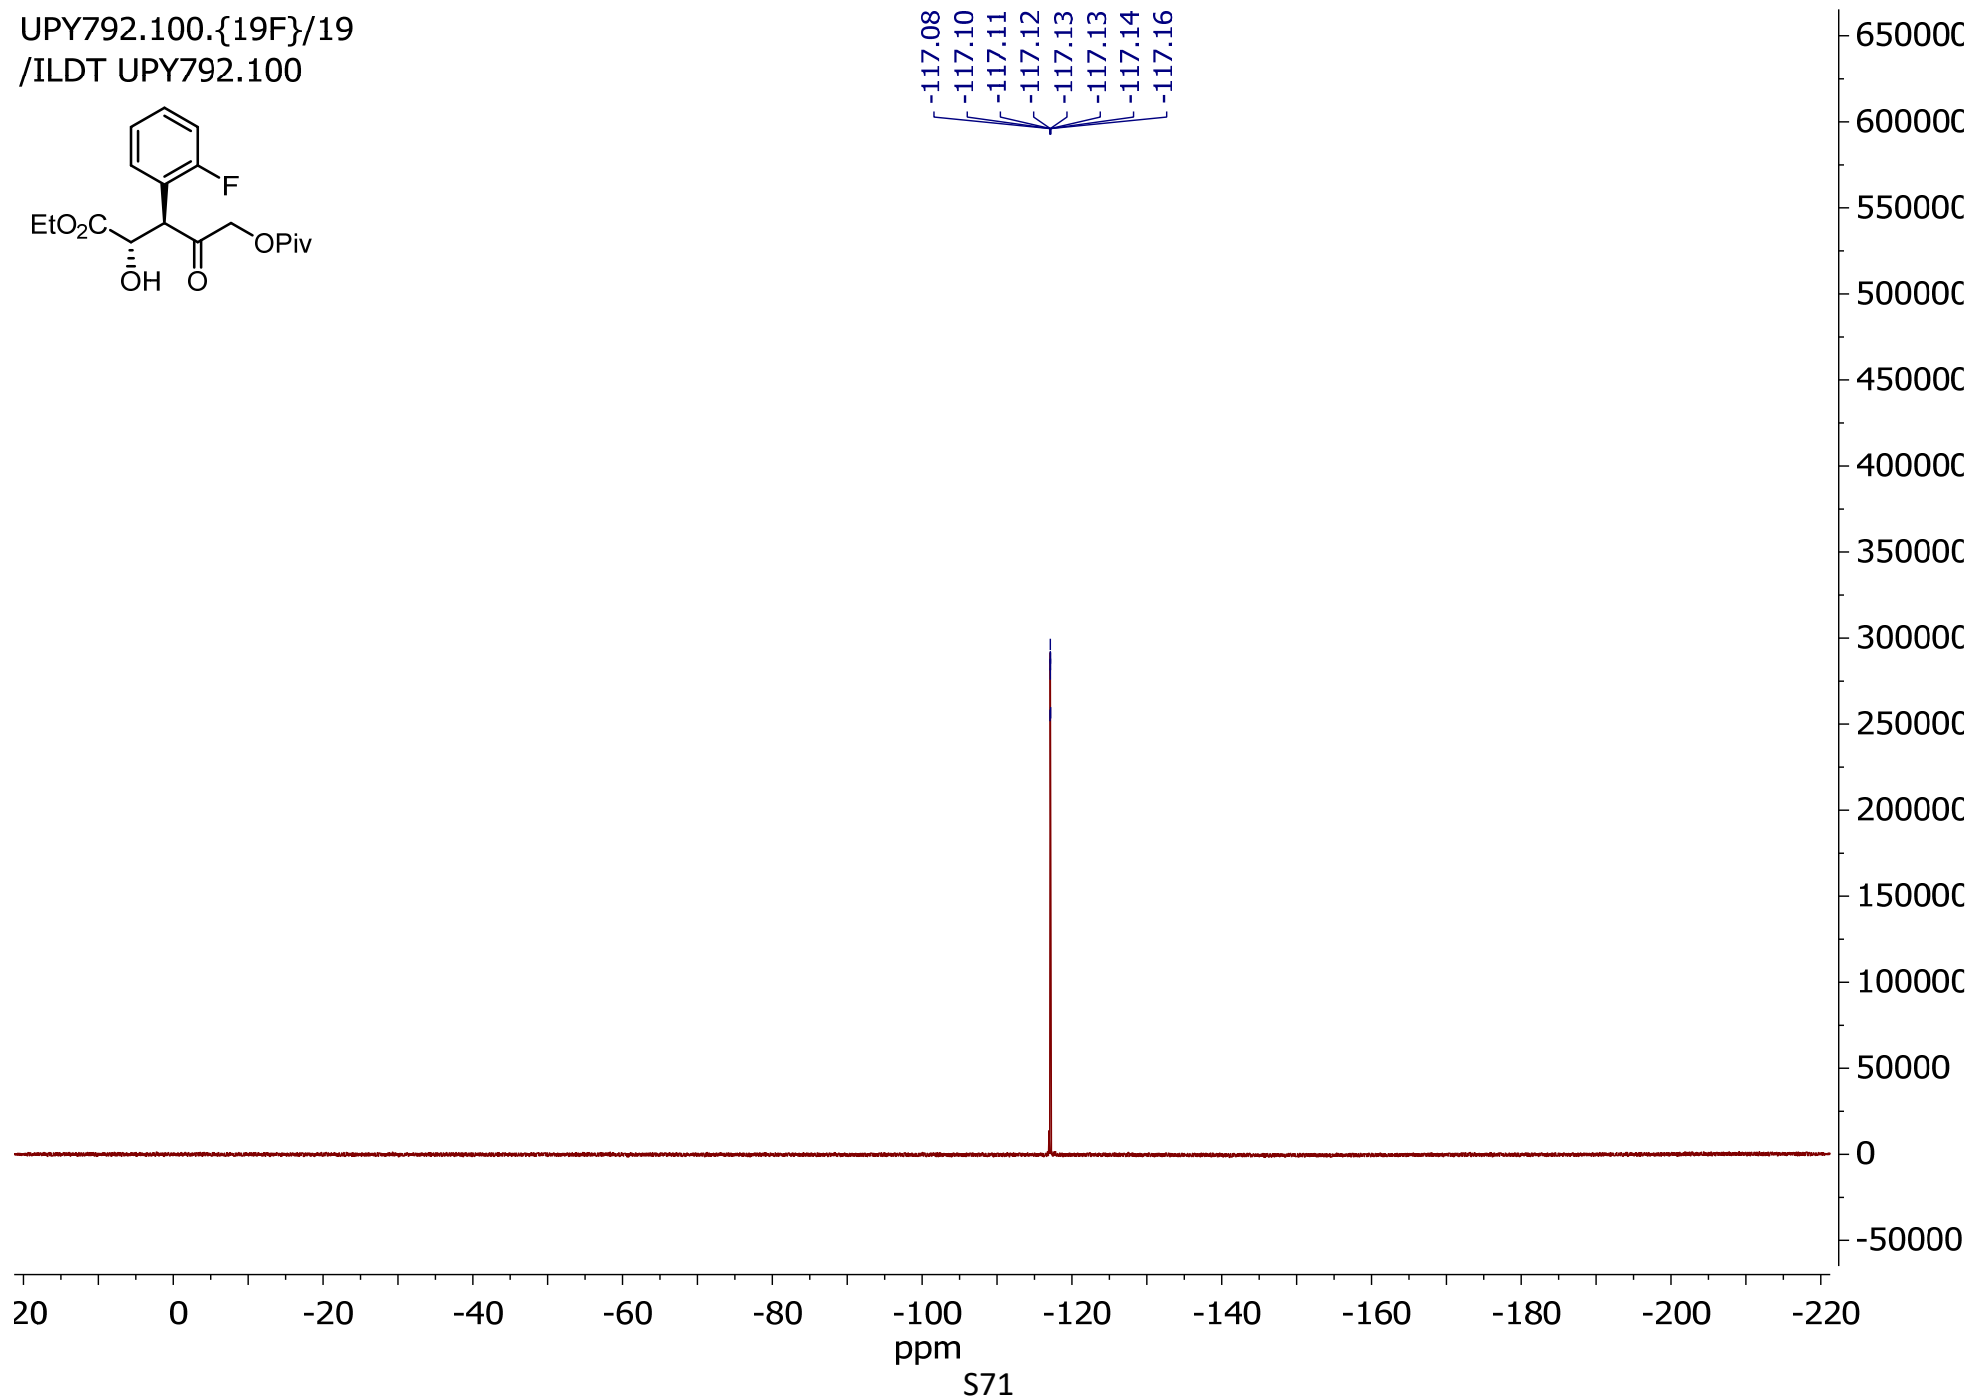

# NMR spectra of 5h

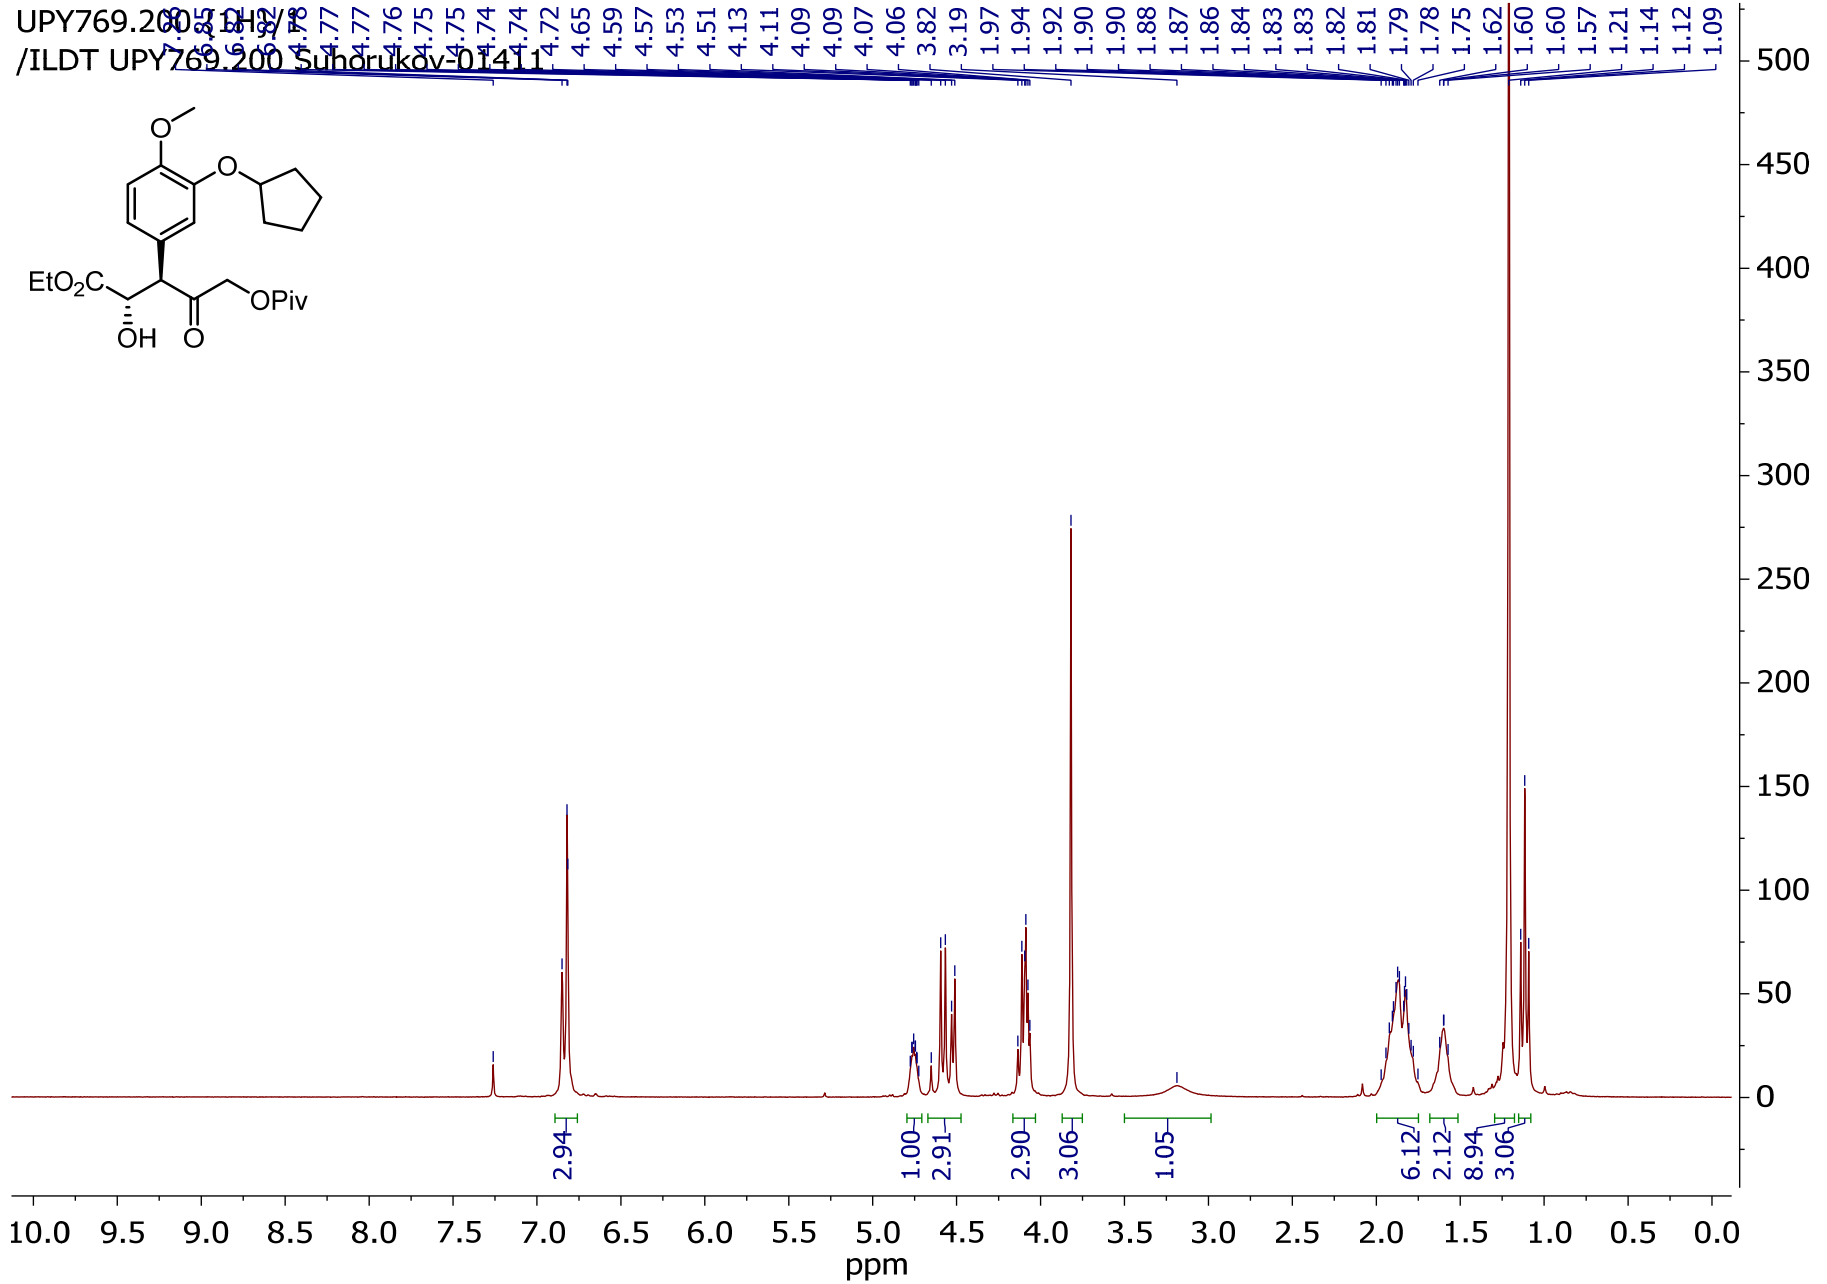



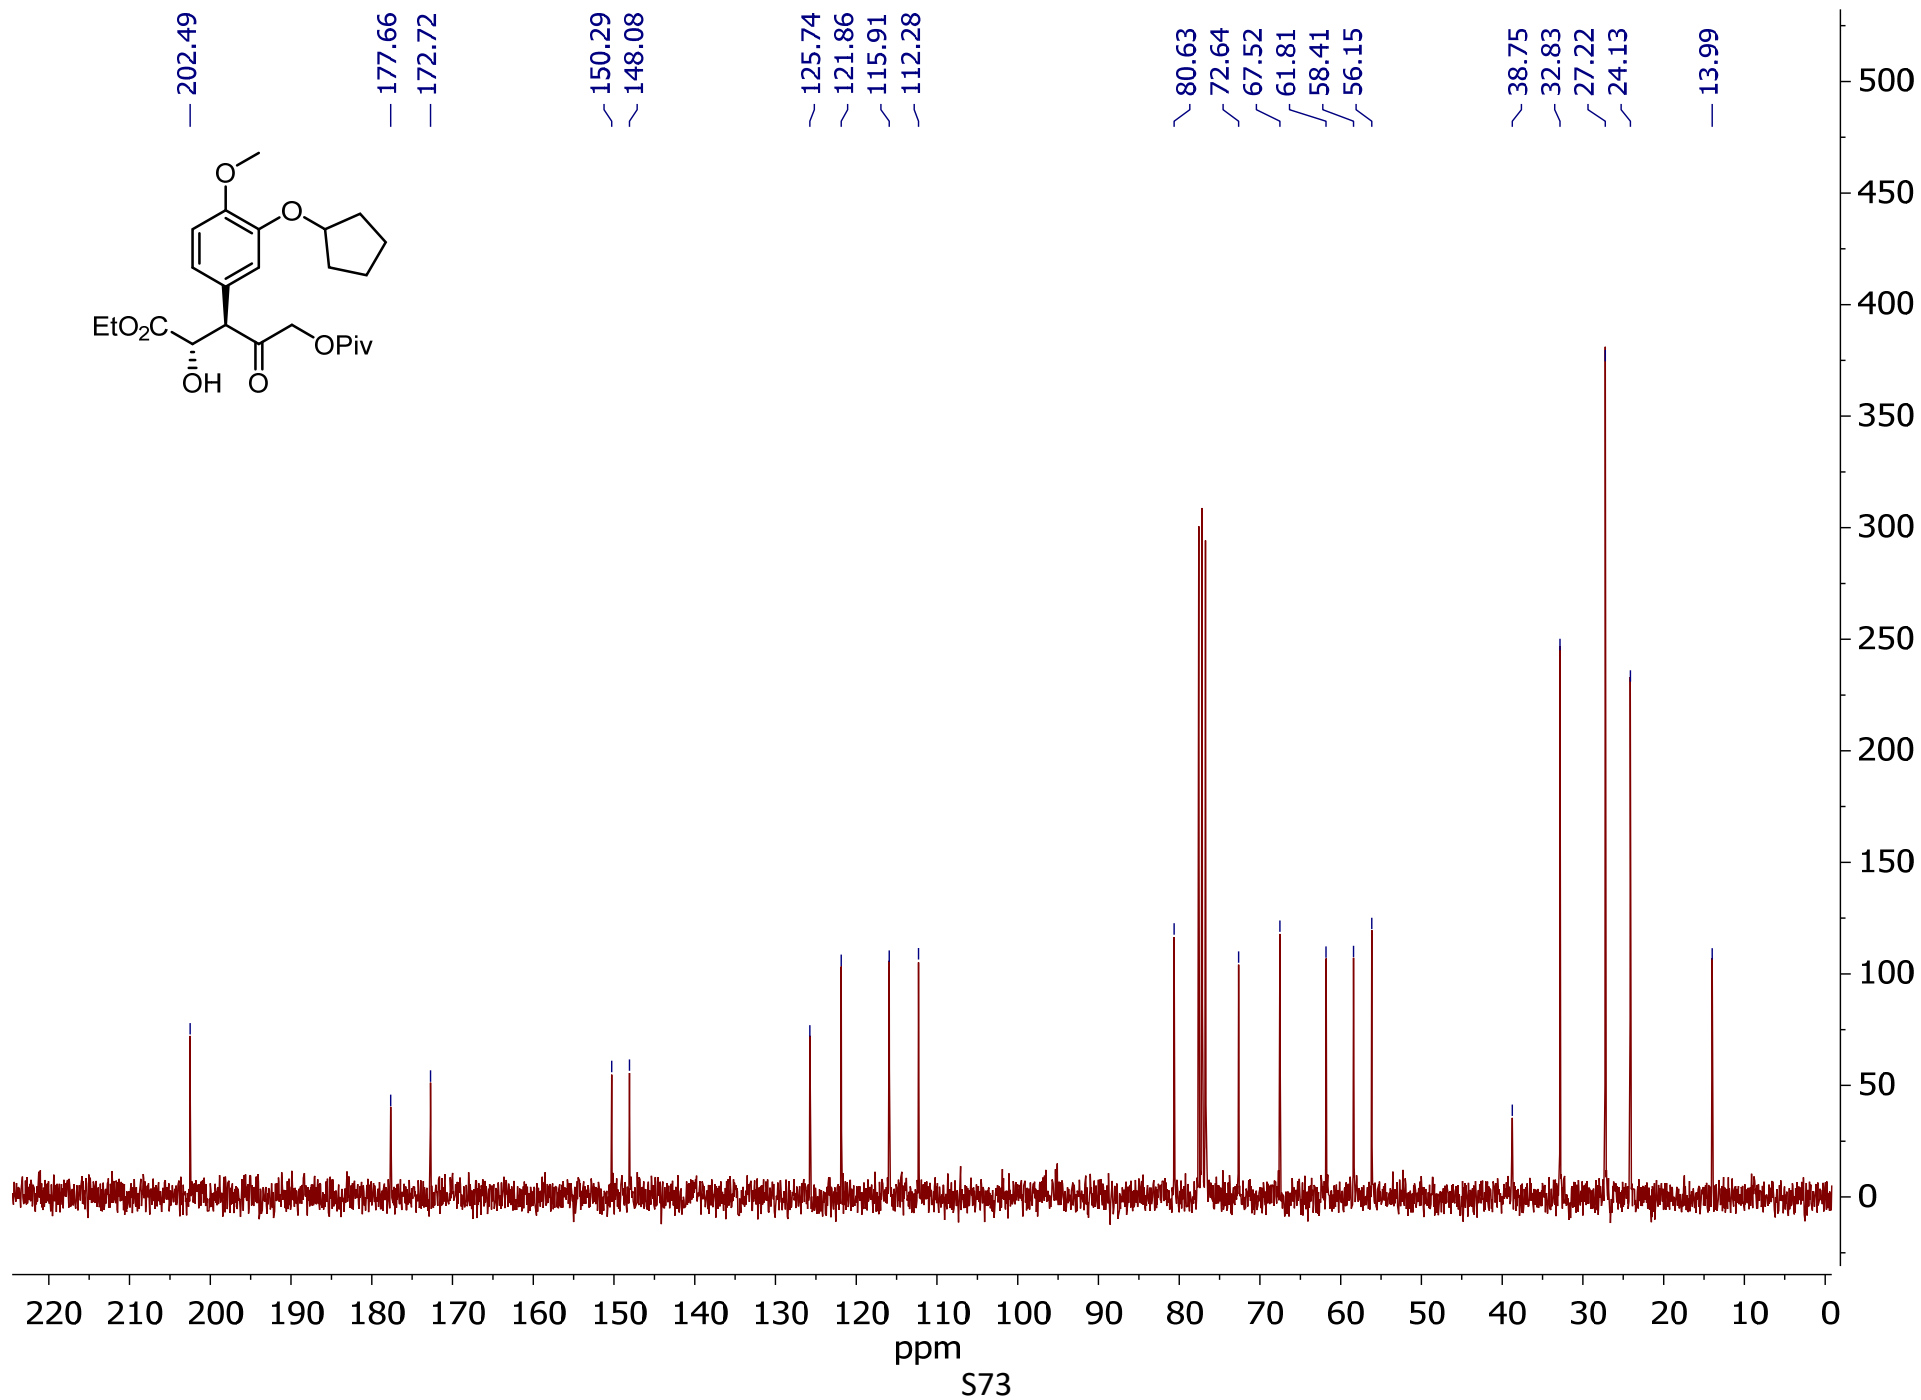

UPY769.201.{13C}deptsp135/3  
/ILDT UPY769.201 Suhorukov-01411

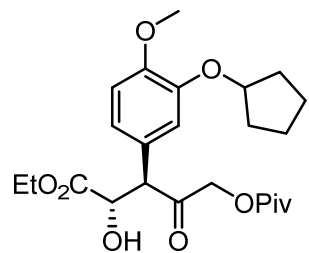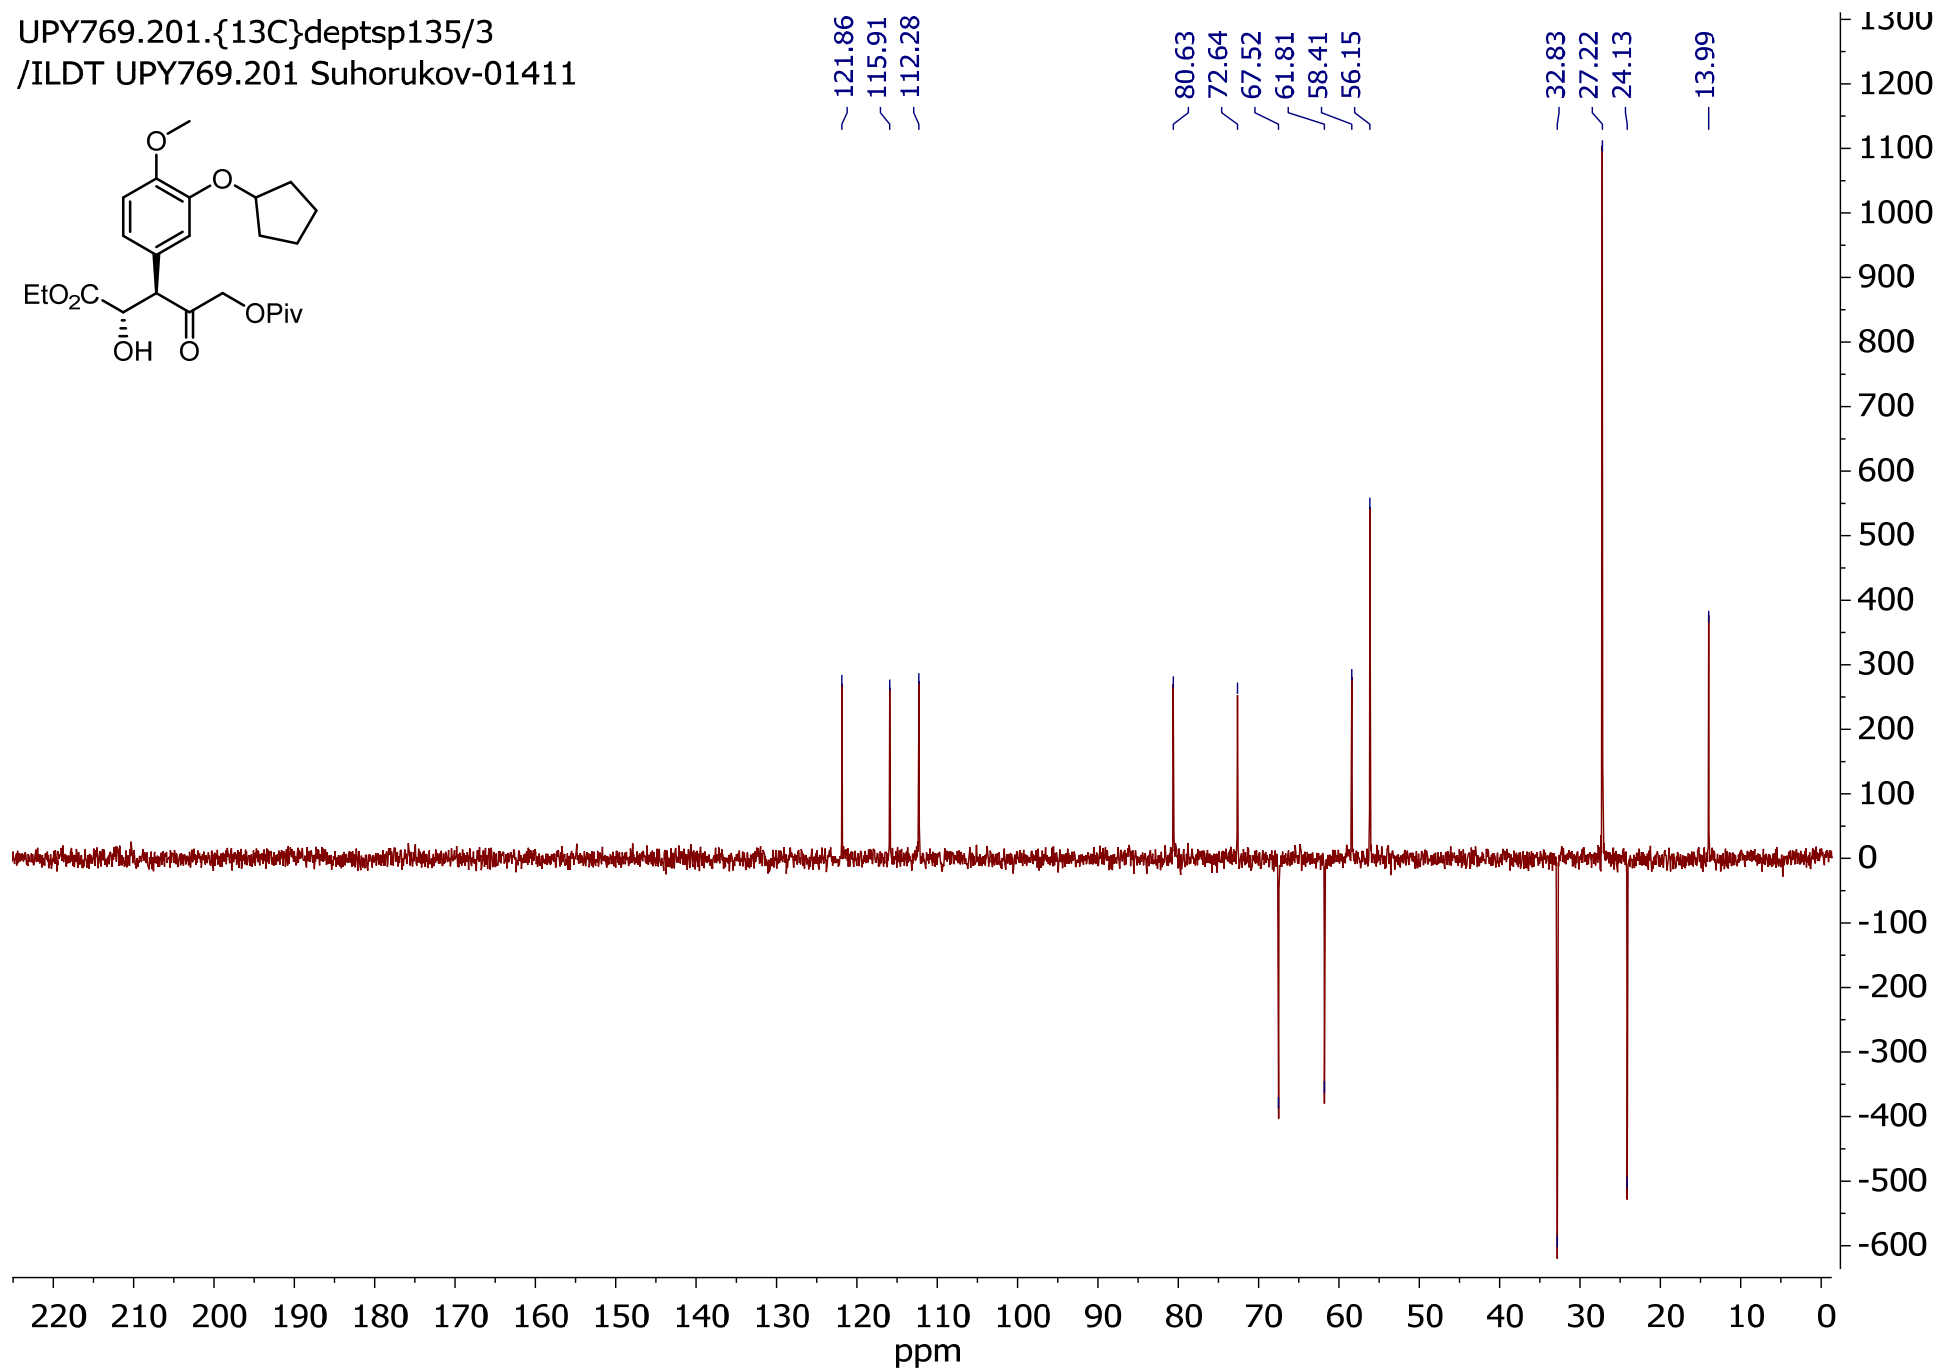

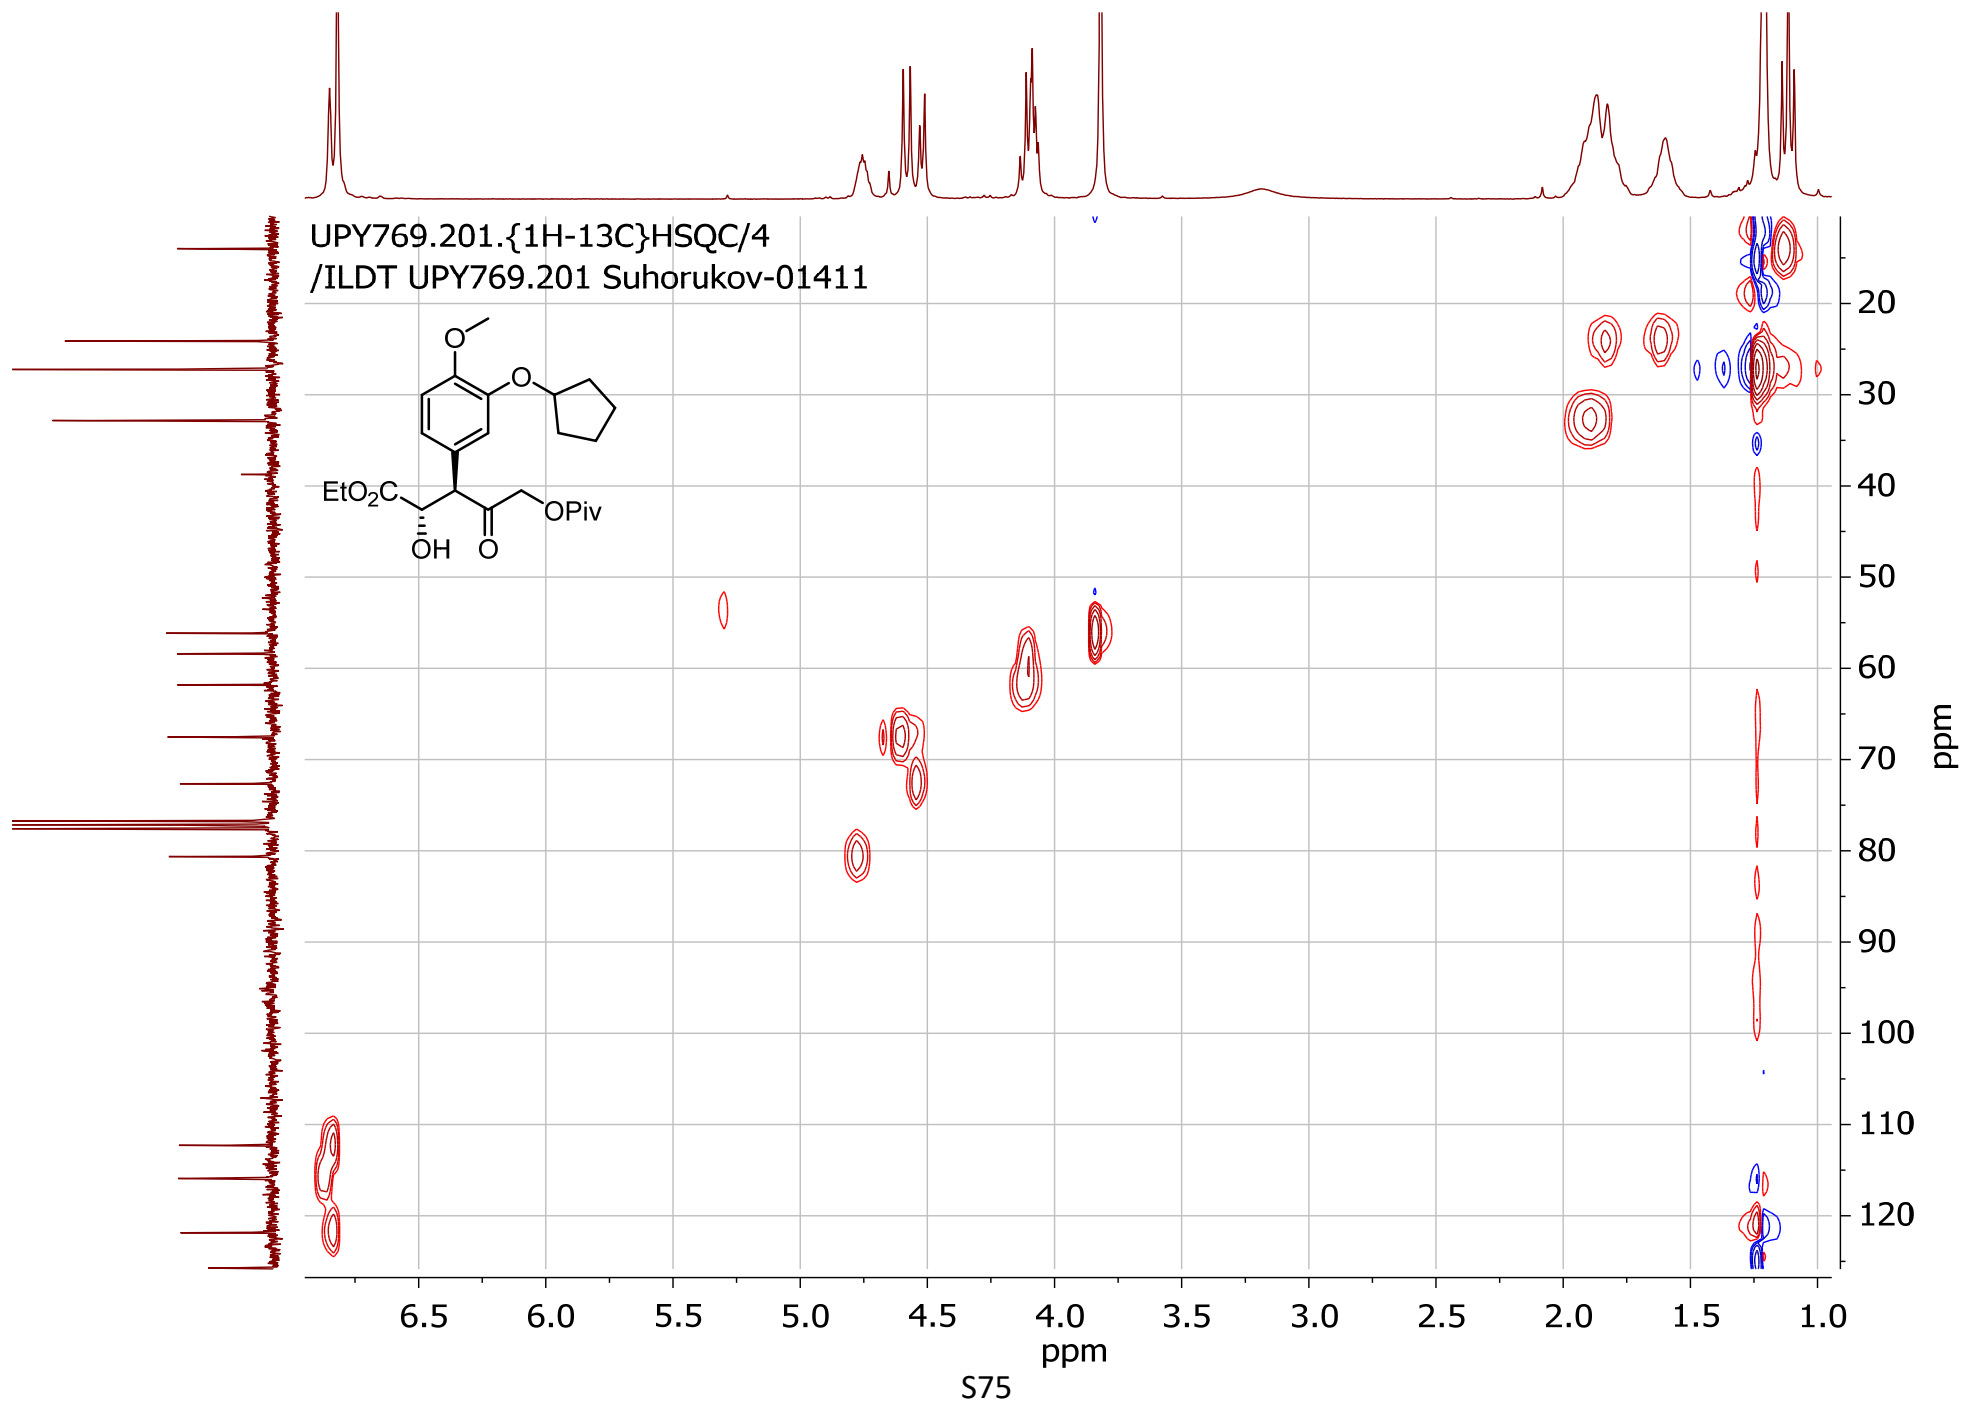

UPY949.100.{1H}/1

7.38  
7.35  
7.31  
7.28

### NMR spectra of 5i

4.66  
4.63  
4.61  
4.59  
4.53  
4.51  
4.19  
4.18  
4.17  
4.14  
4.12  
4.10

1.23  
1.16  
1.14  
1.12

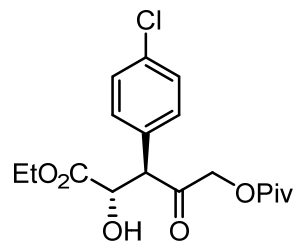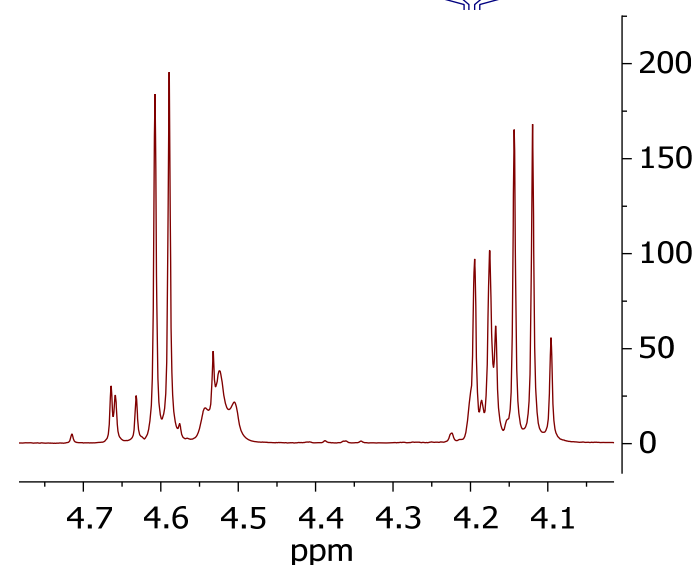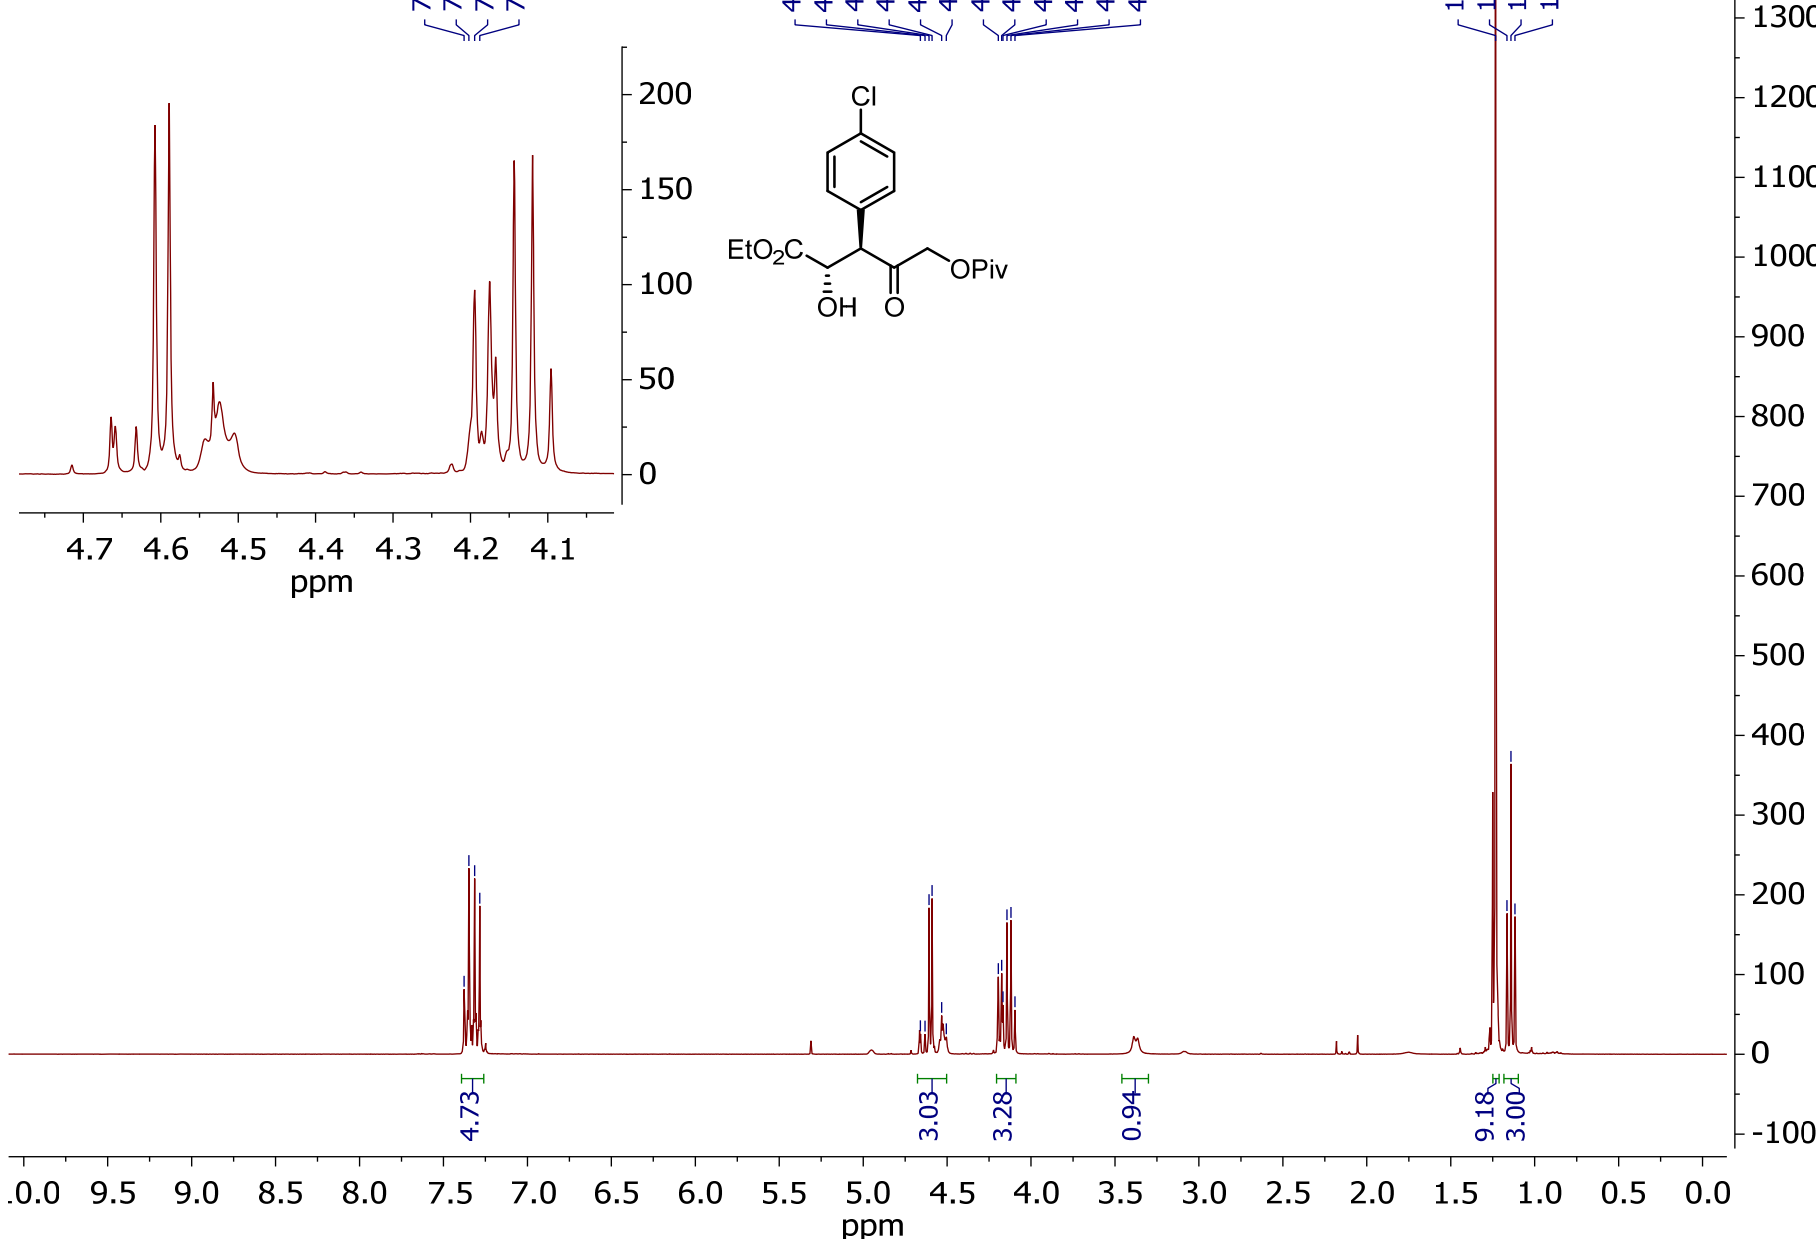

UPY949.000.{13C}/2

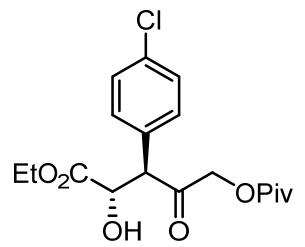

201.81  
177.71  
172.42

134.68  
132.11  
130.82  
129.34

72.48  
67.67  
62.05  
57.97

38.78

27.22

13.96

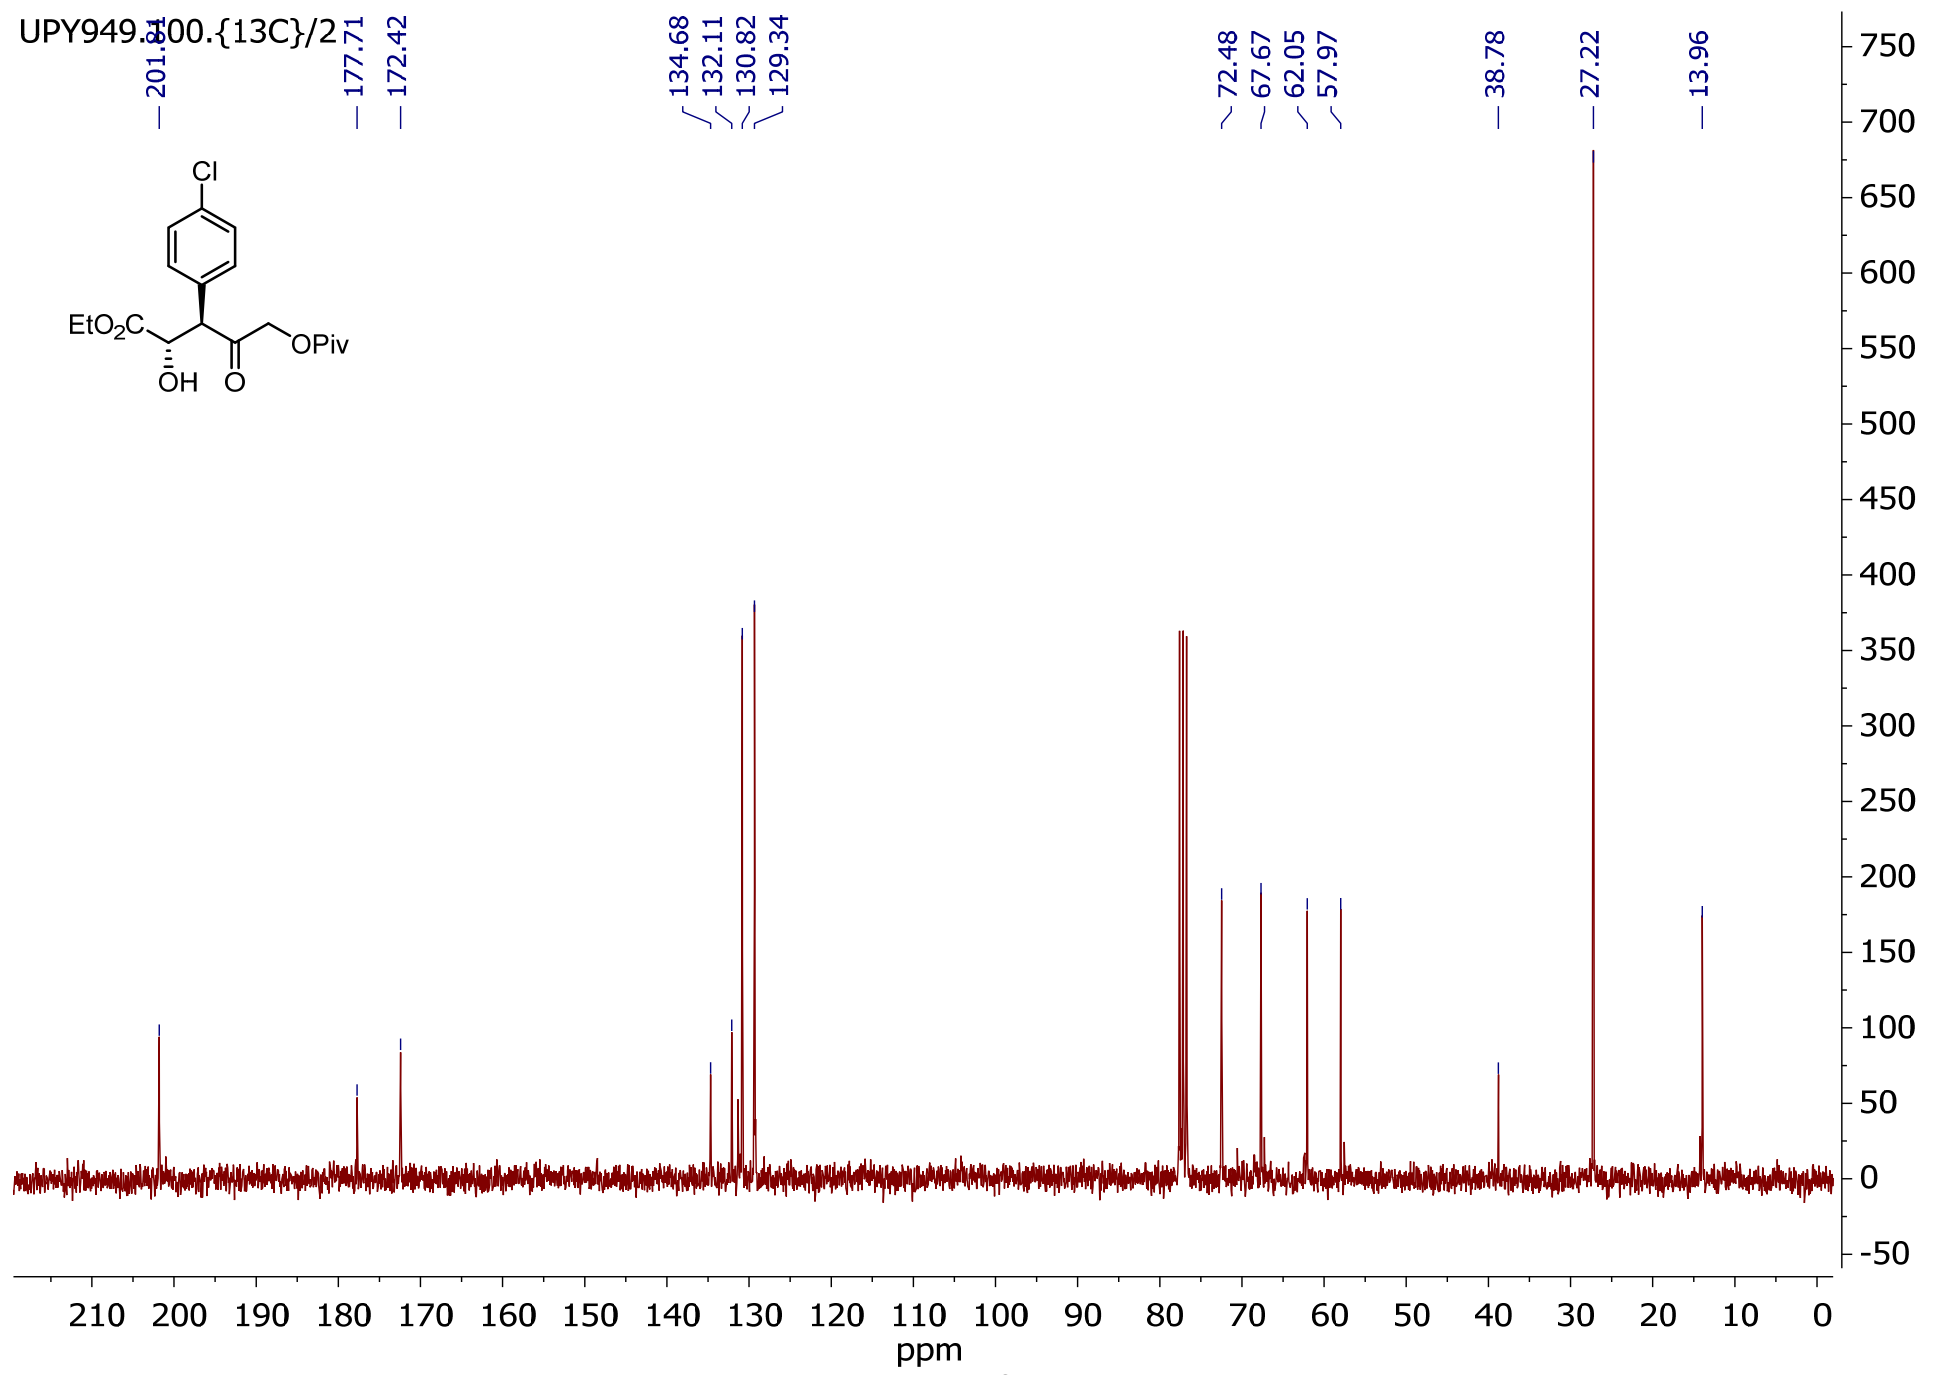

UPY949.100.{13C}deptsp135/3

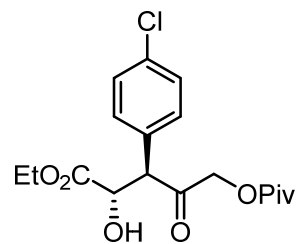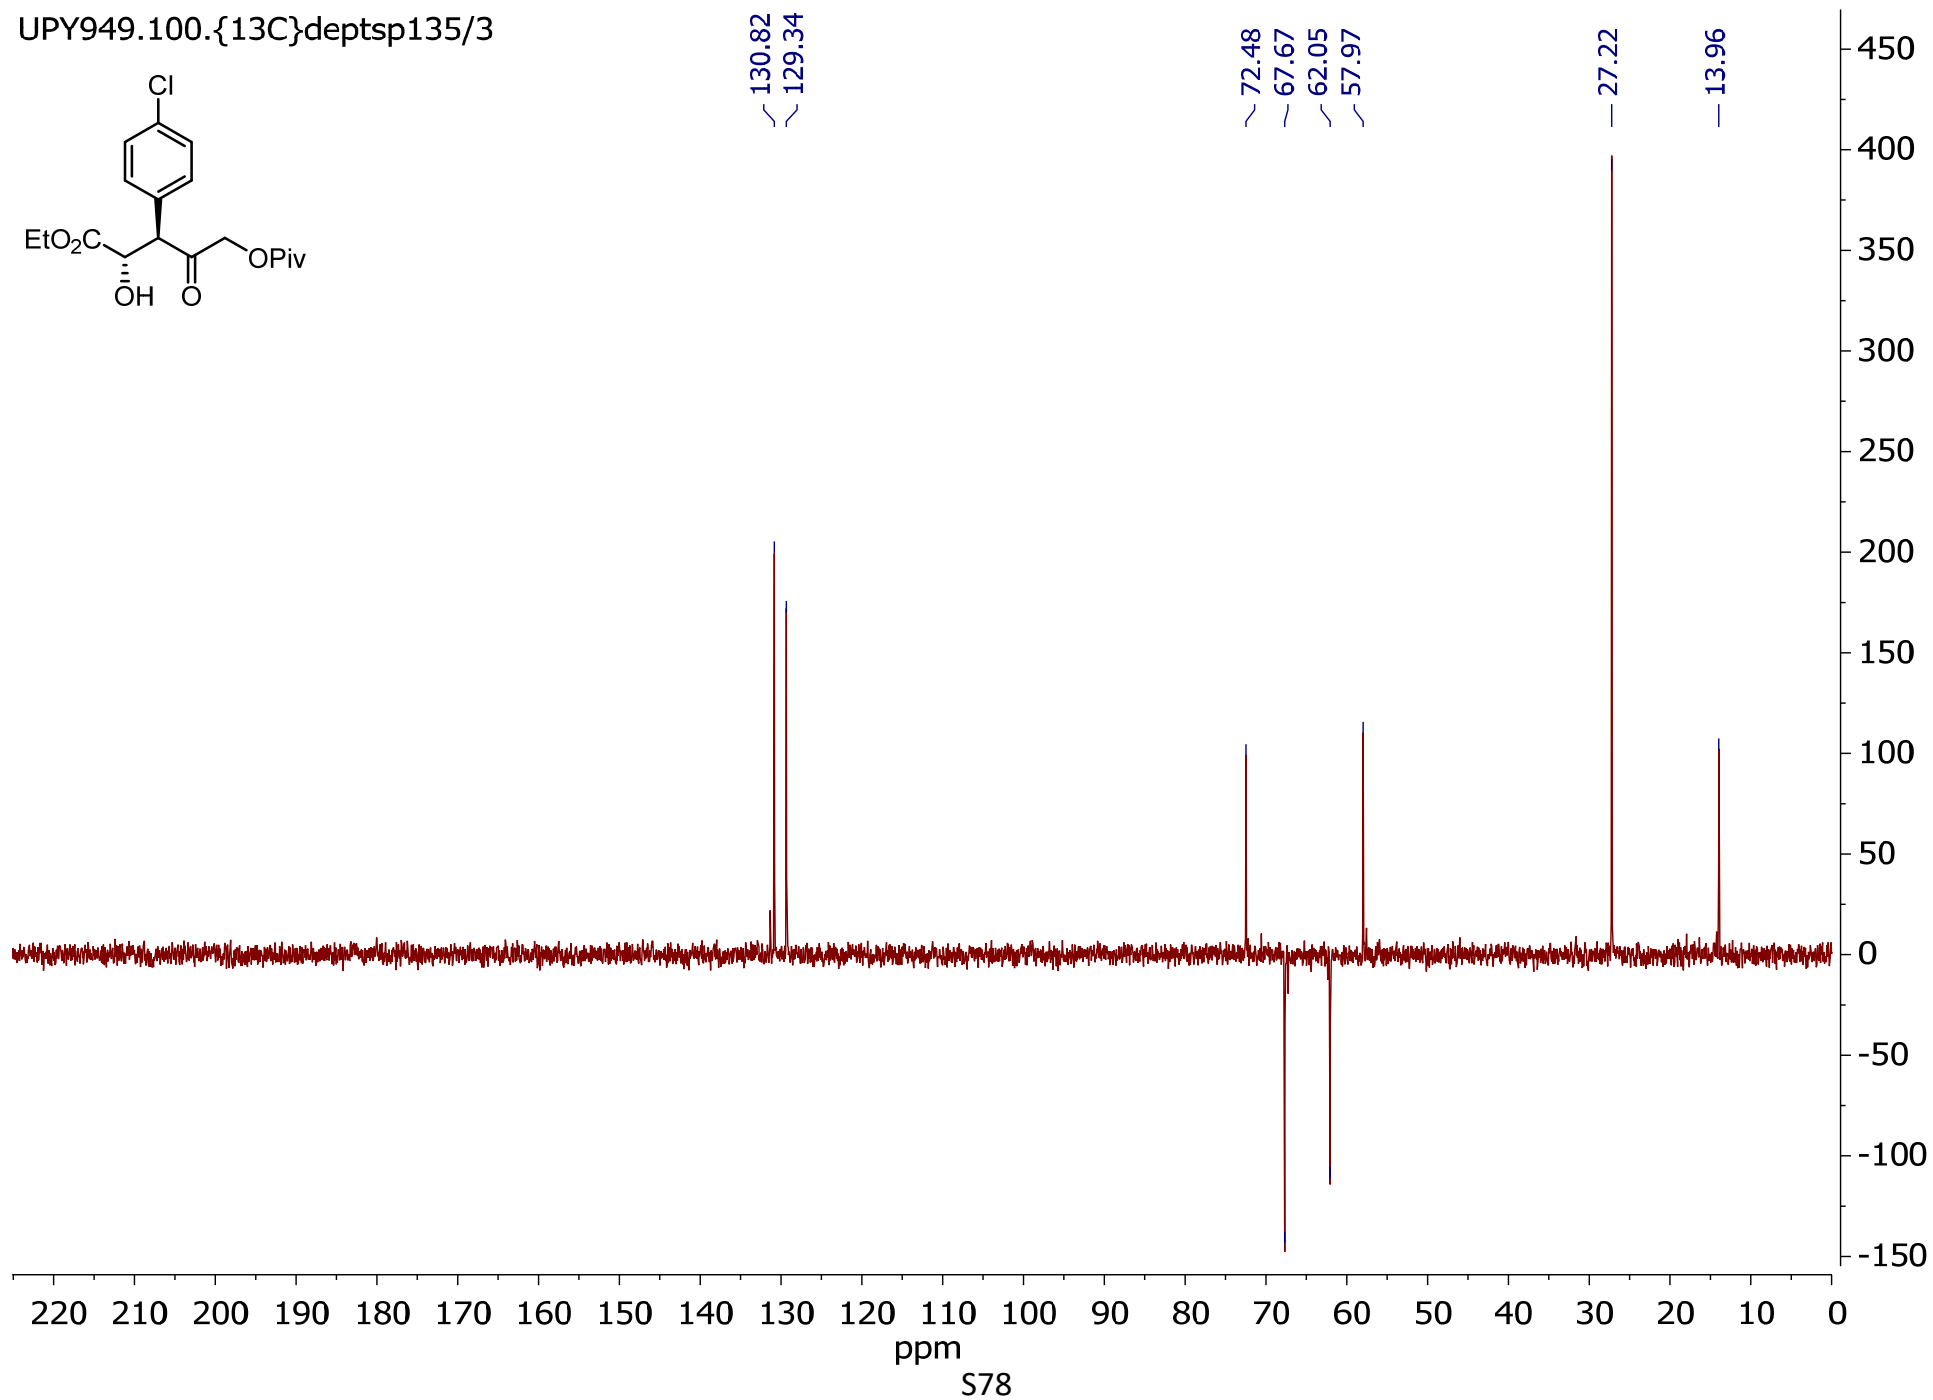

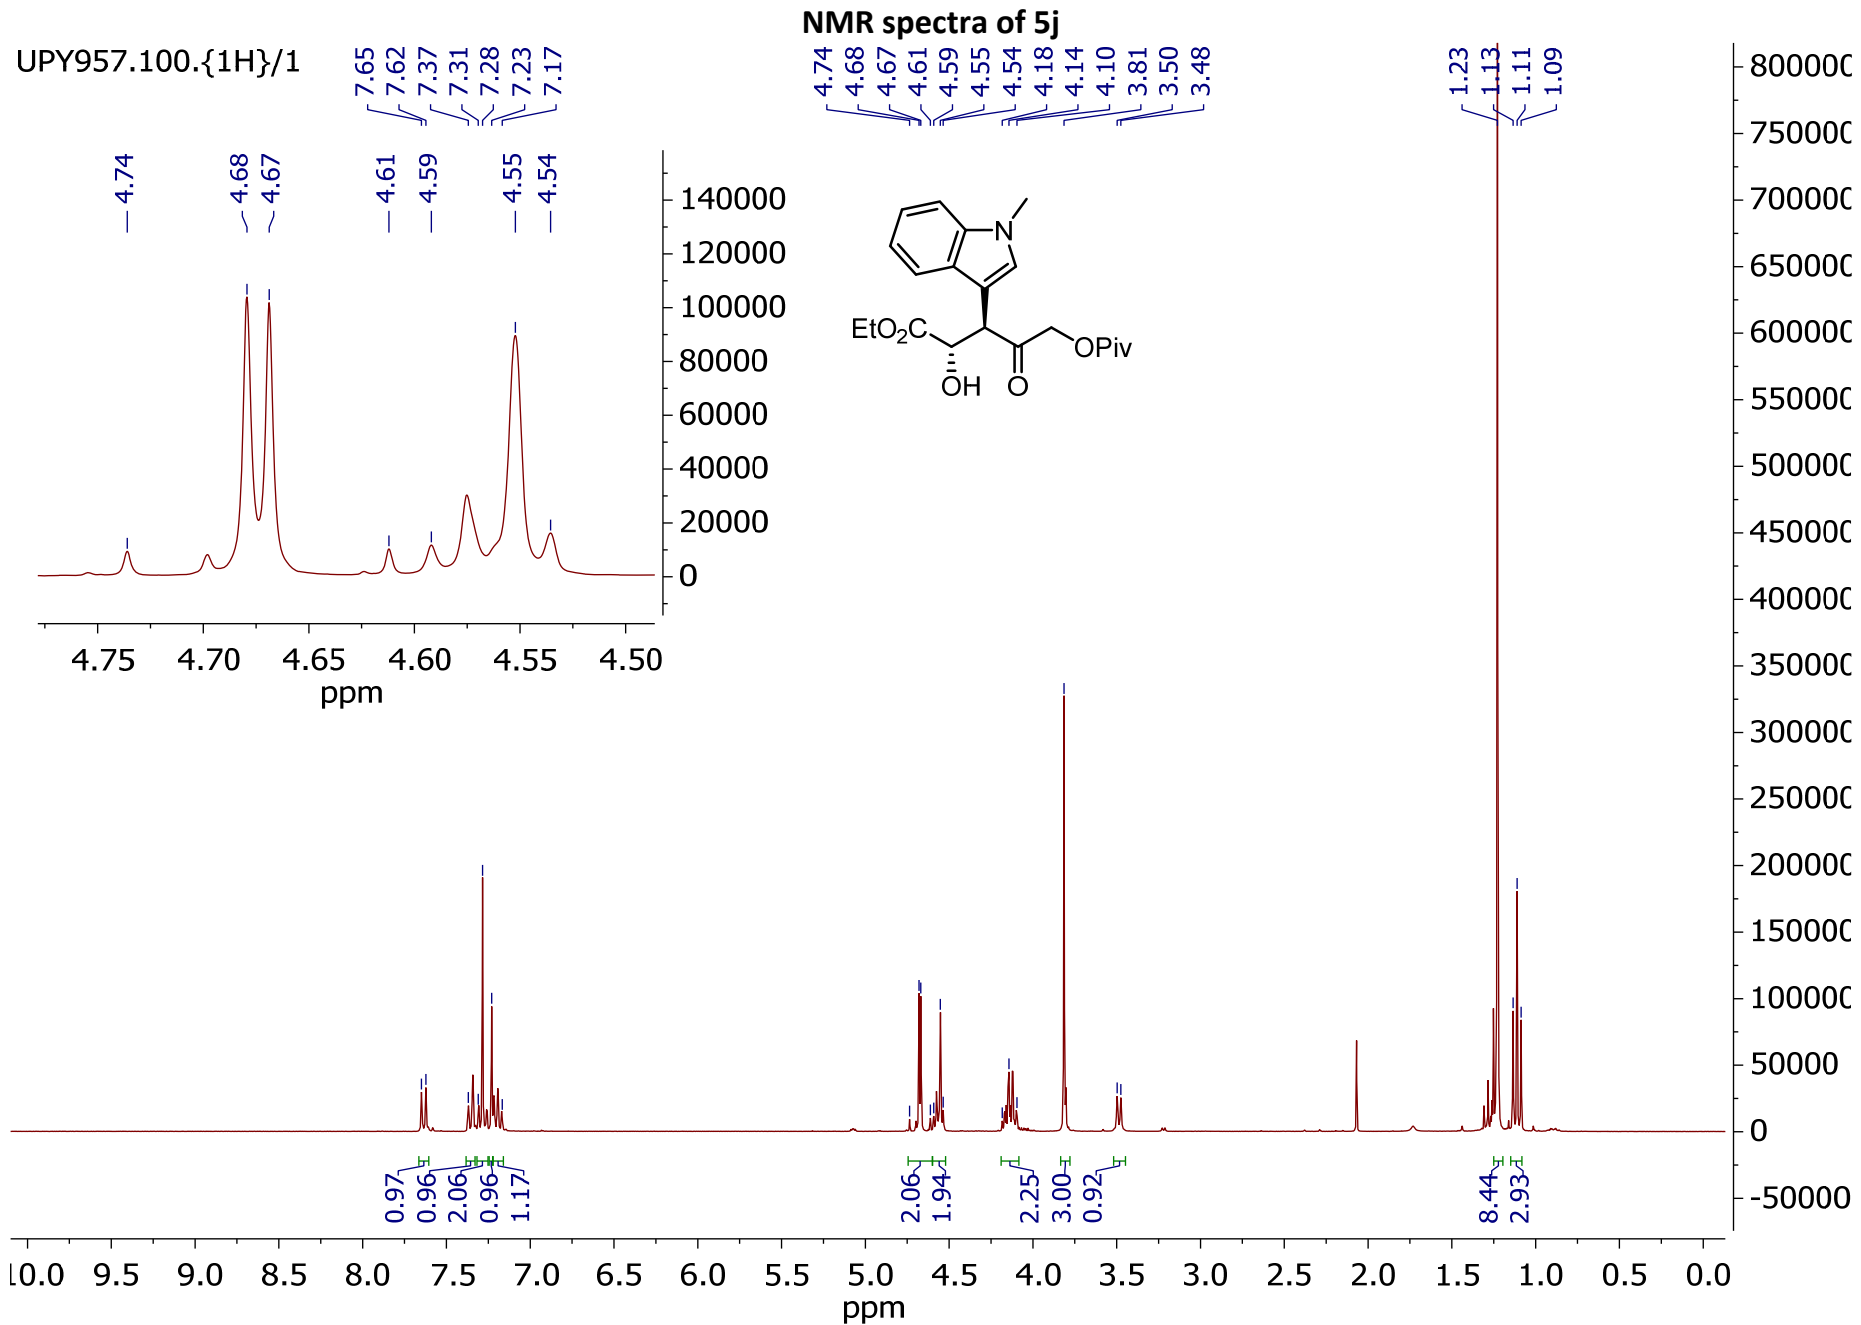

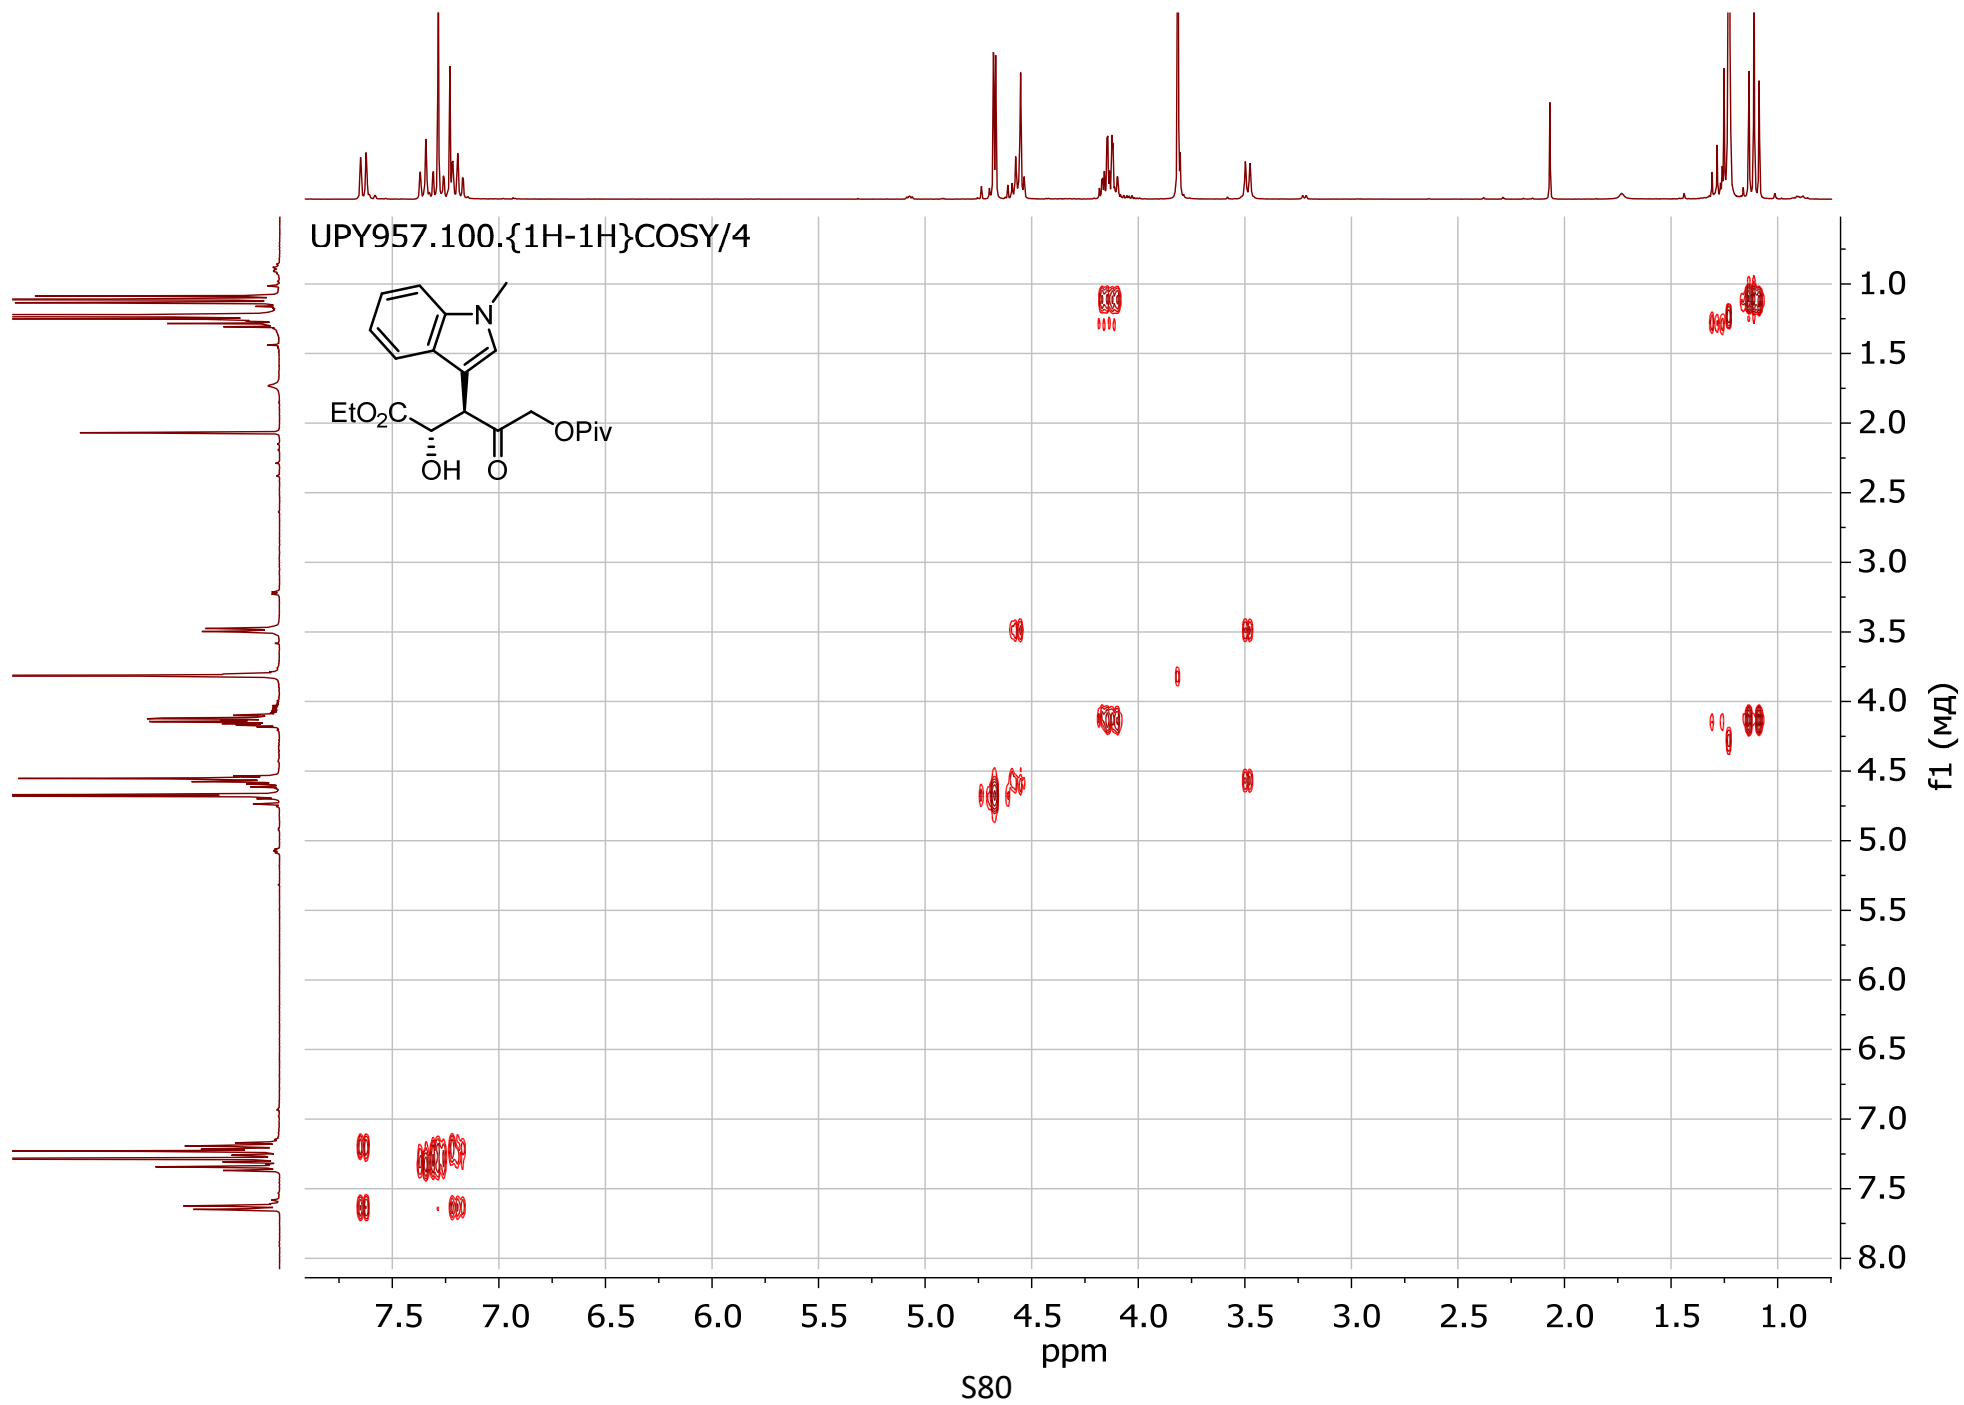



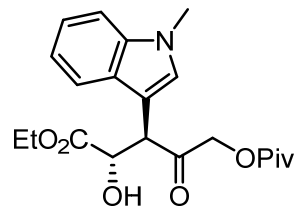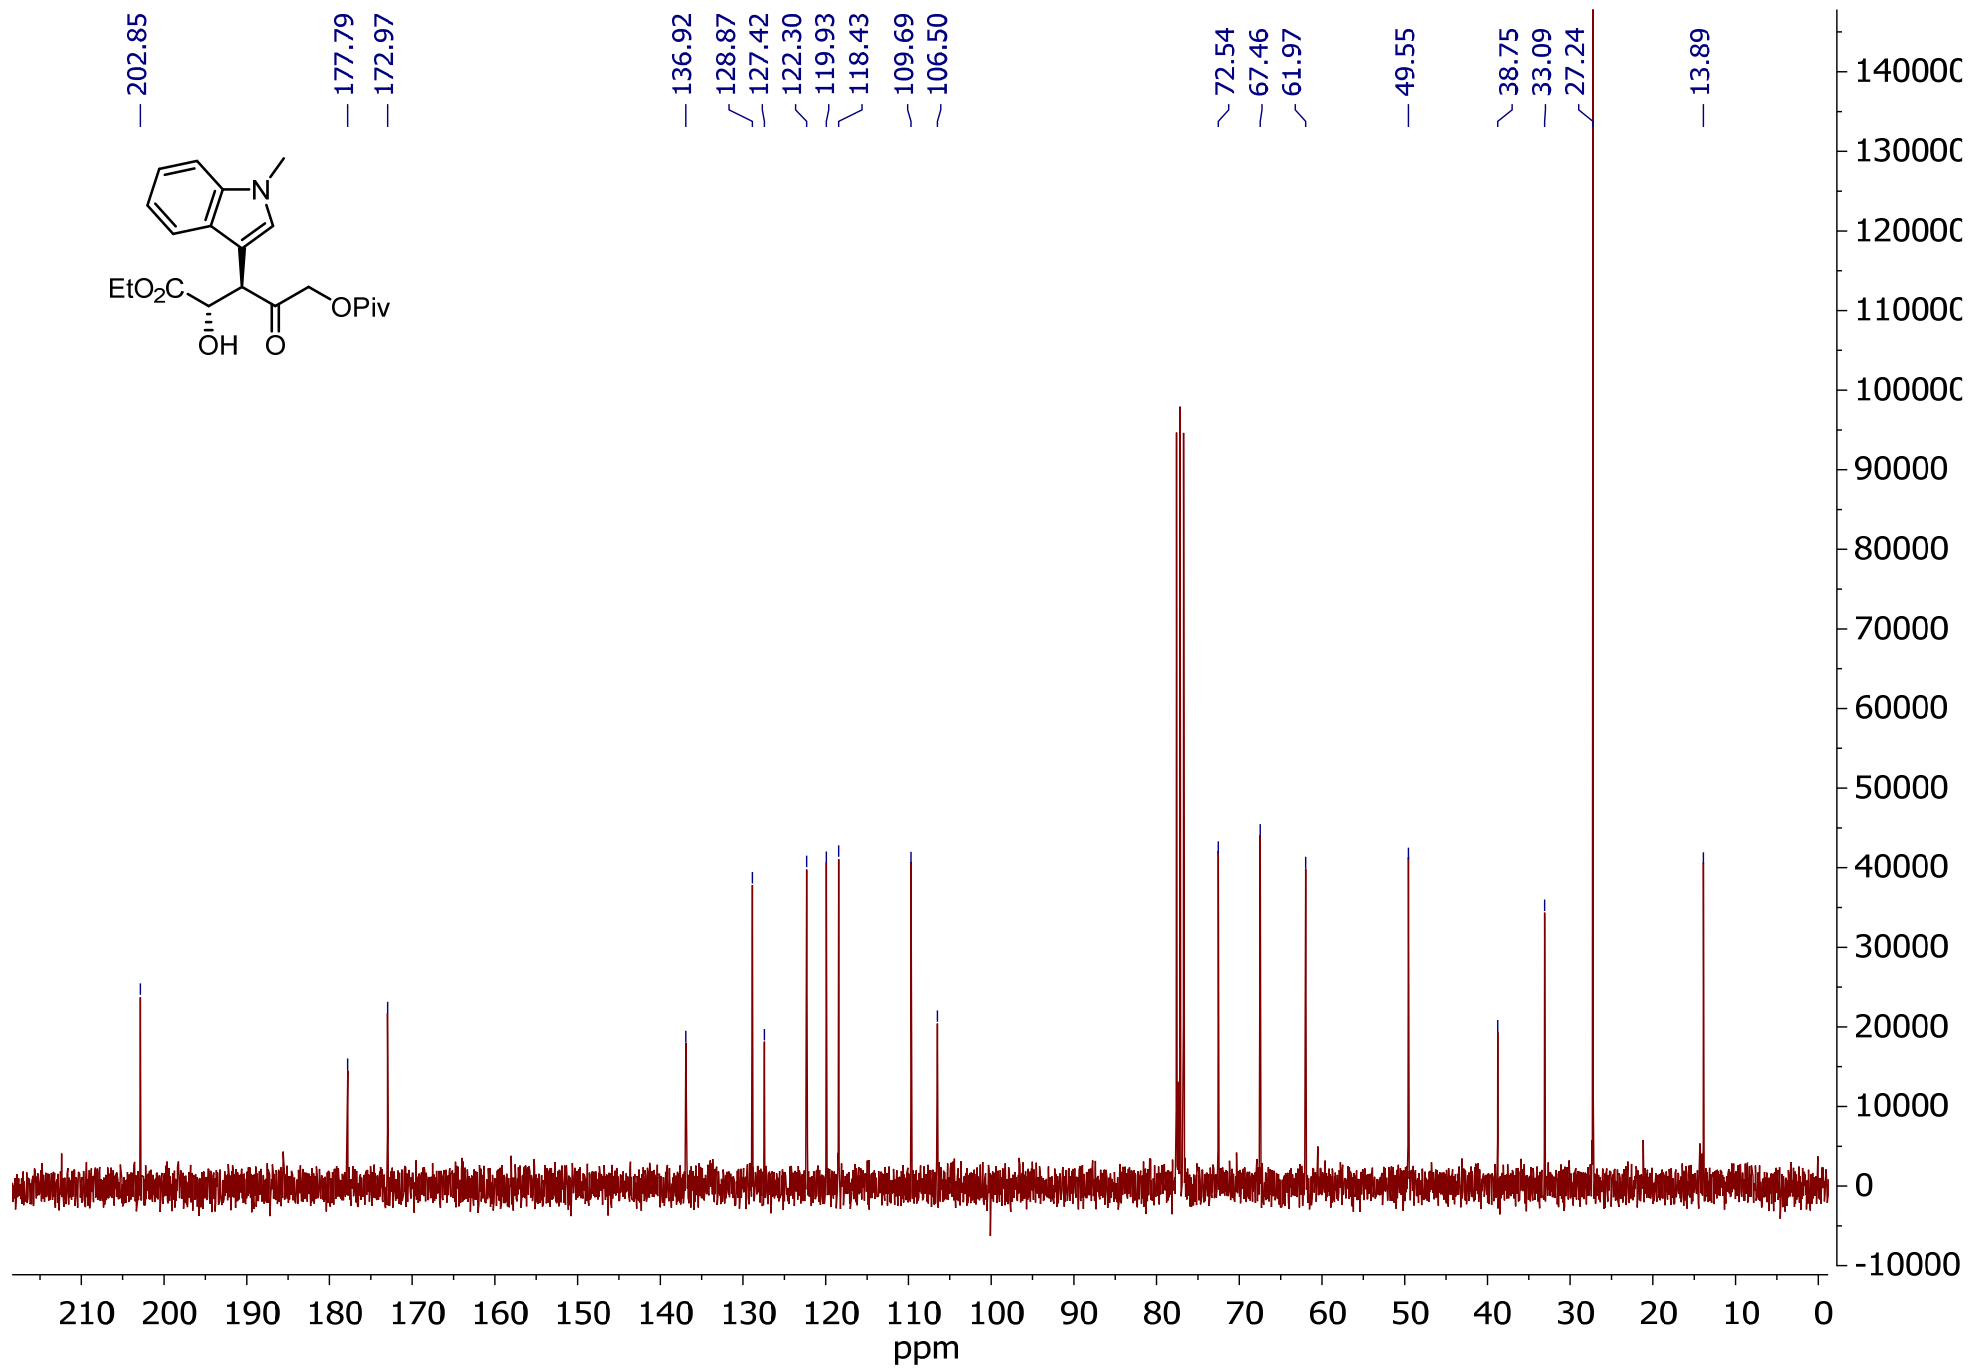

UPY957.100.{13C}depts135/3

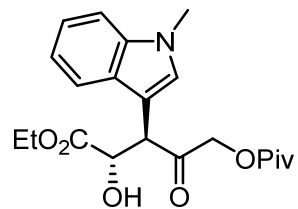

128.87  
122.30  
119.92  
118.42  
109.69

72.54  
67.46  
61.96

49.54

33.08  
27.23

13.89

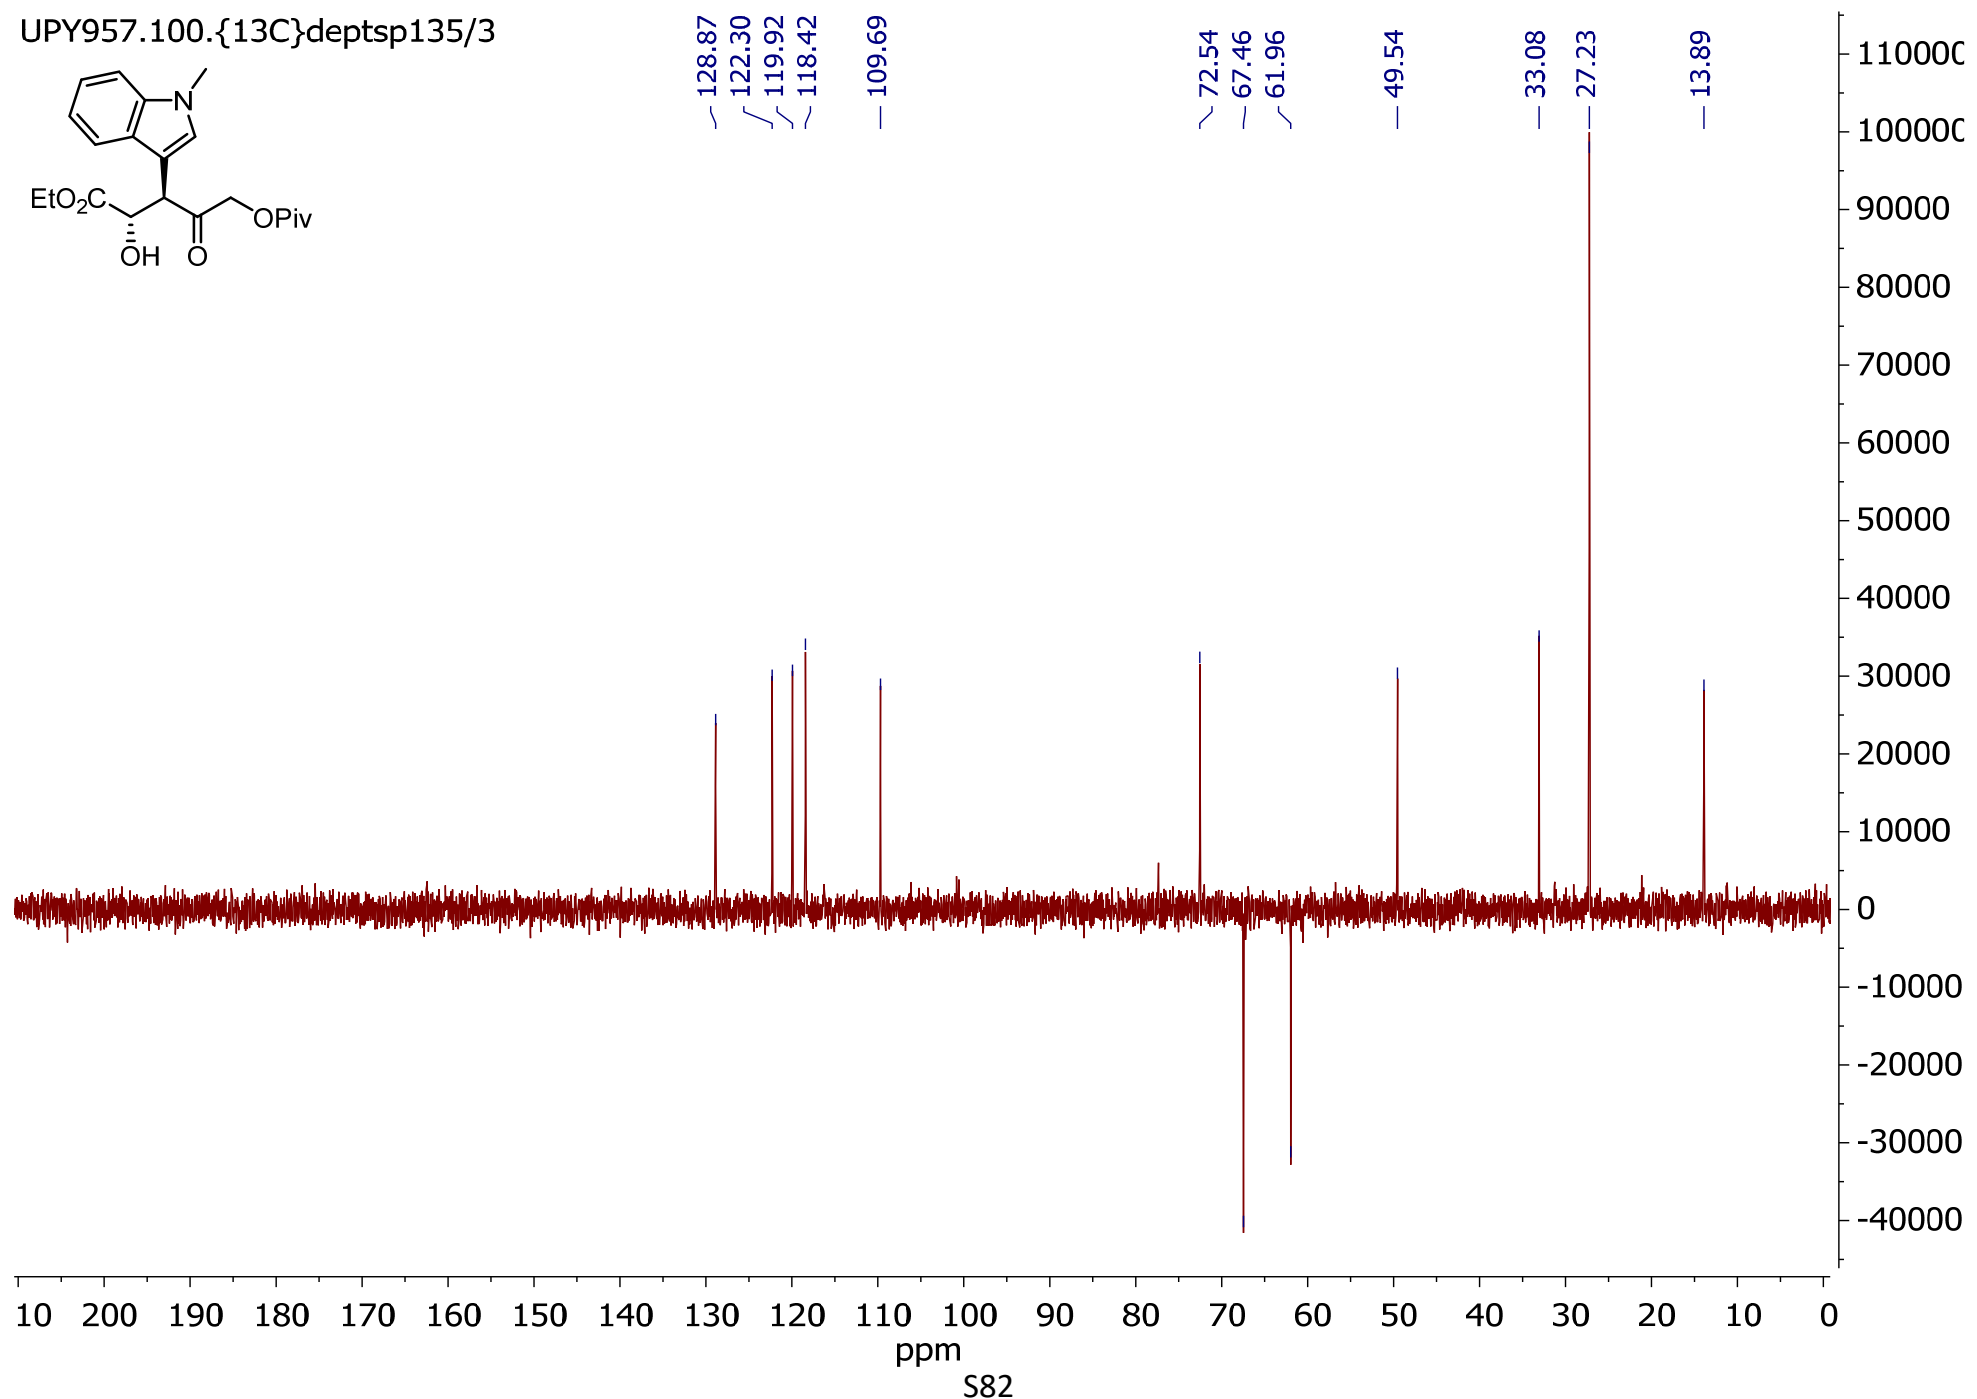

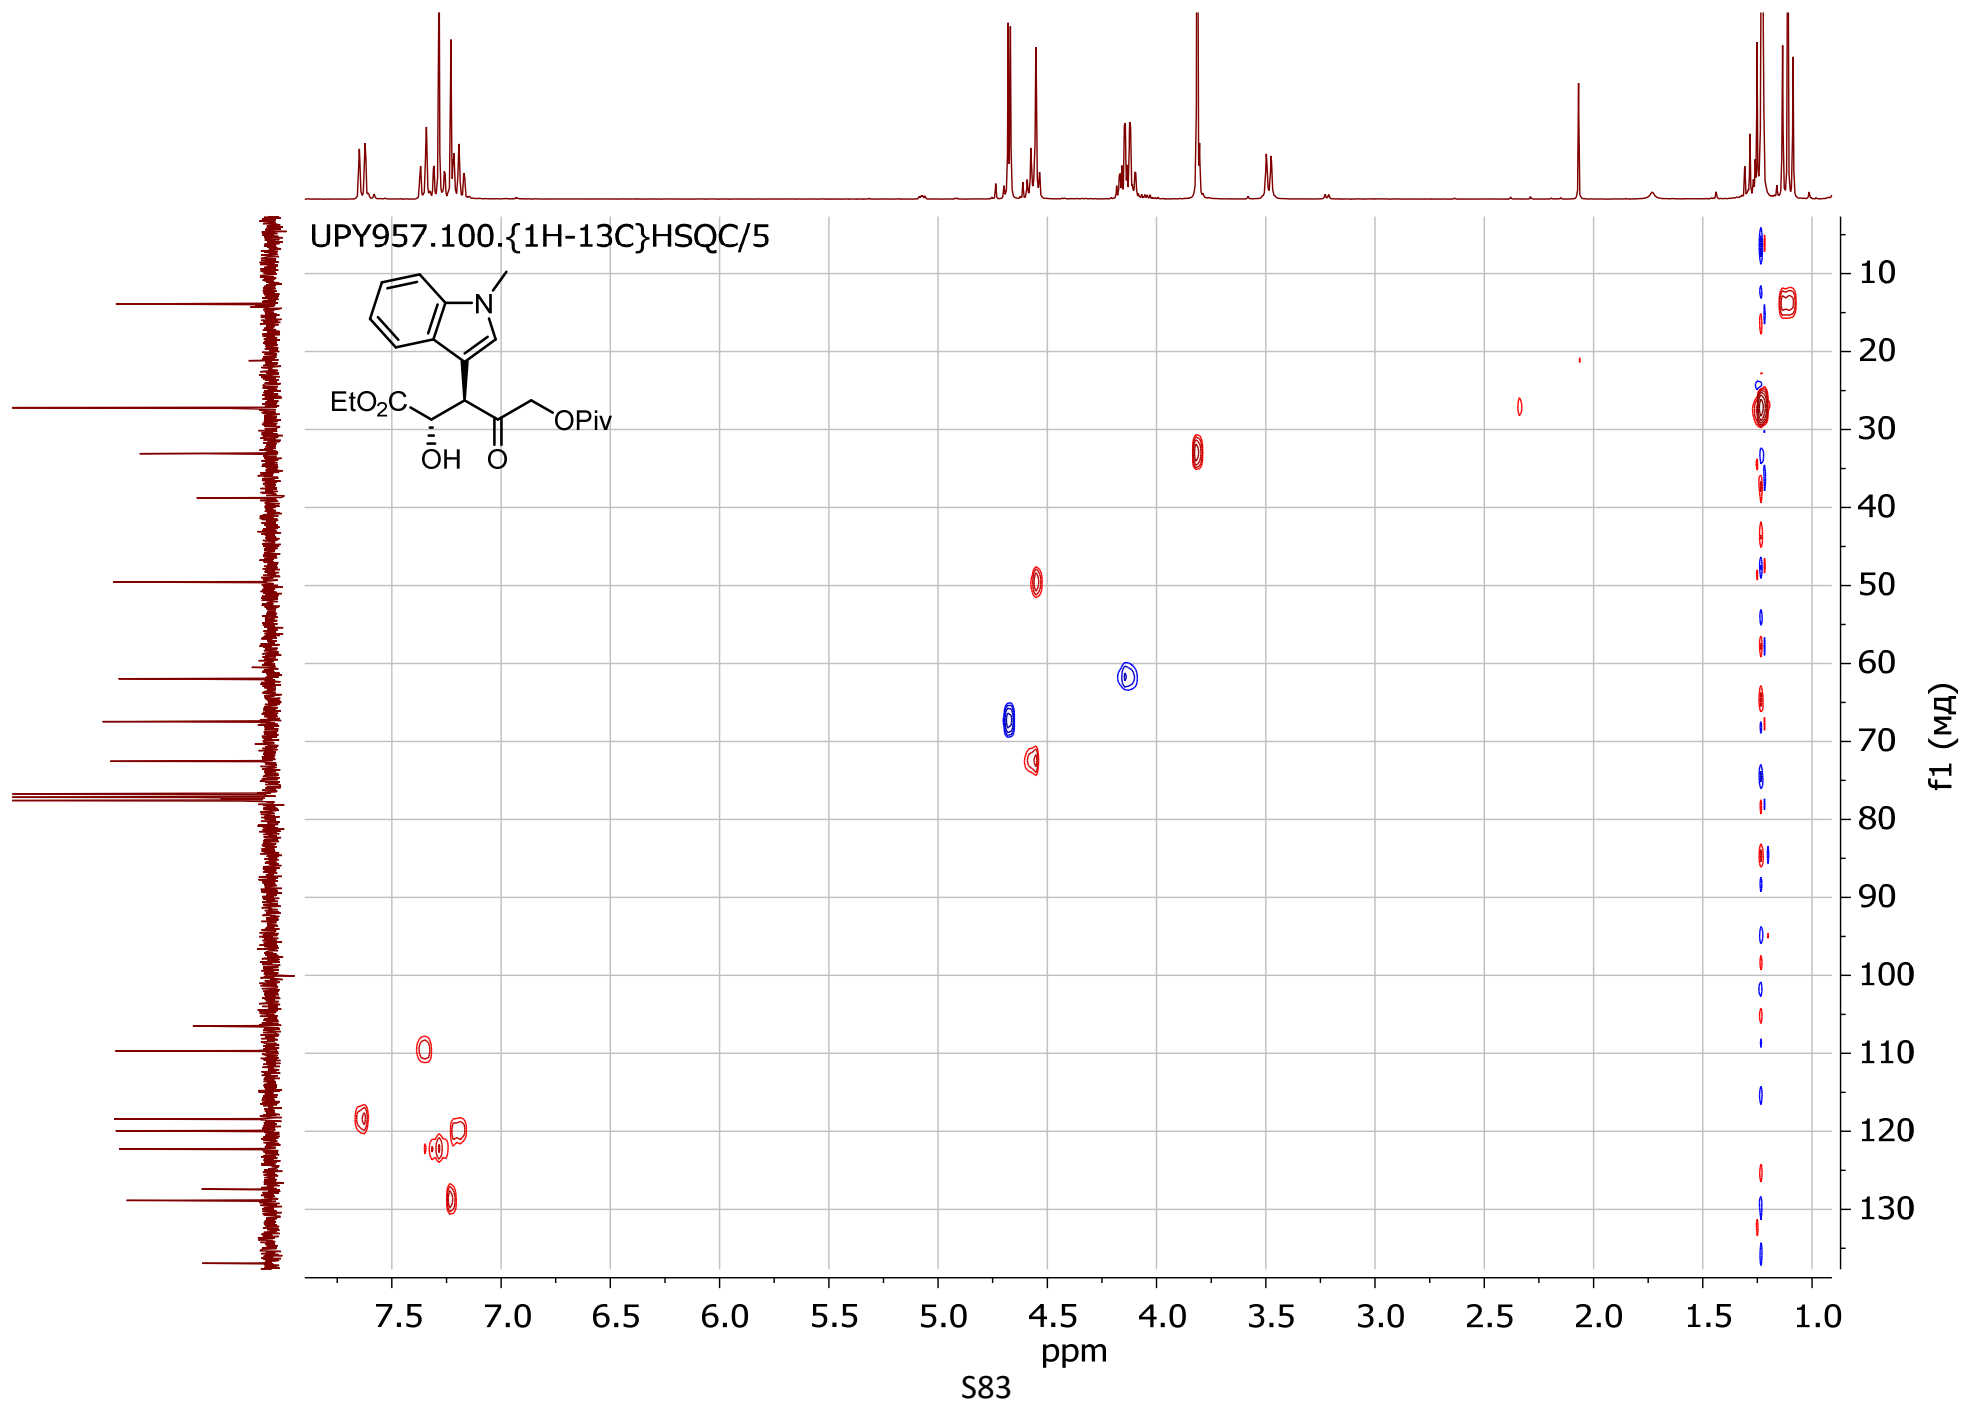

UPY775.200.{1H}/1  
/ILDT UPY775.200 Suhorukov-01411

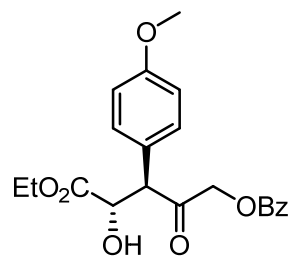

### NMR spectra of 5k

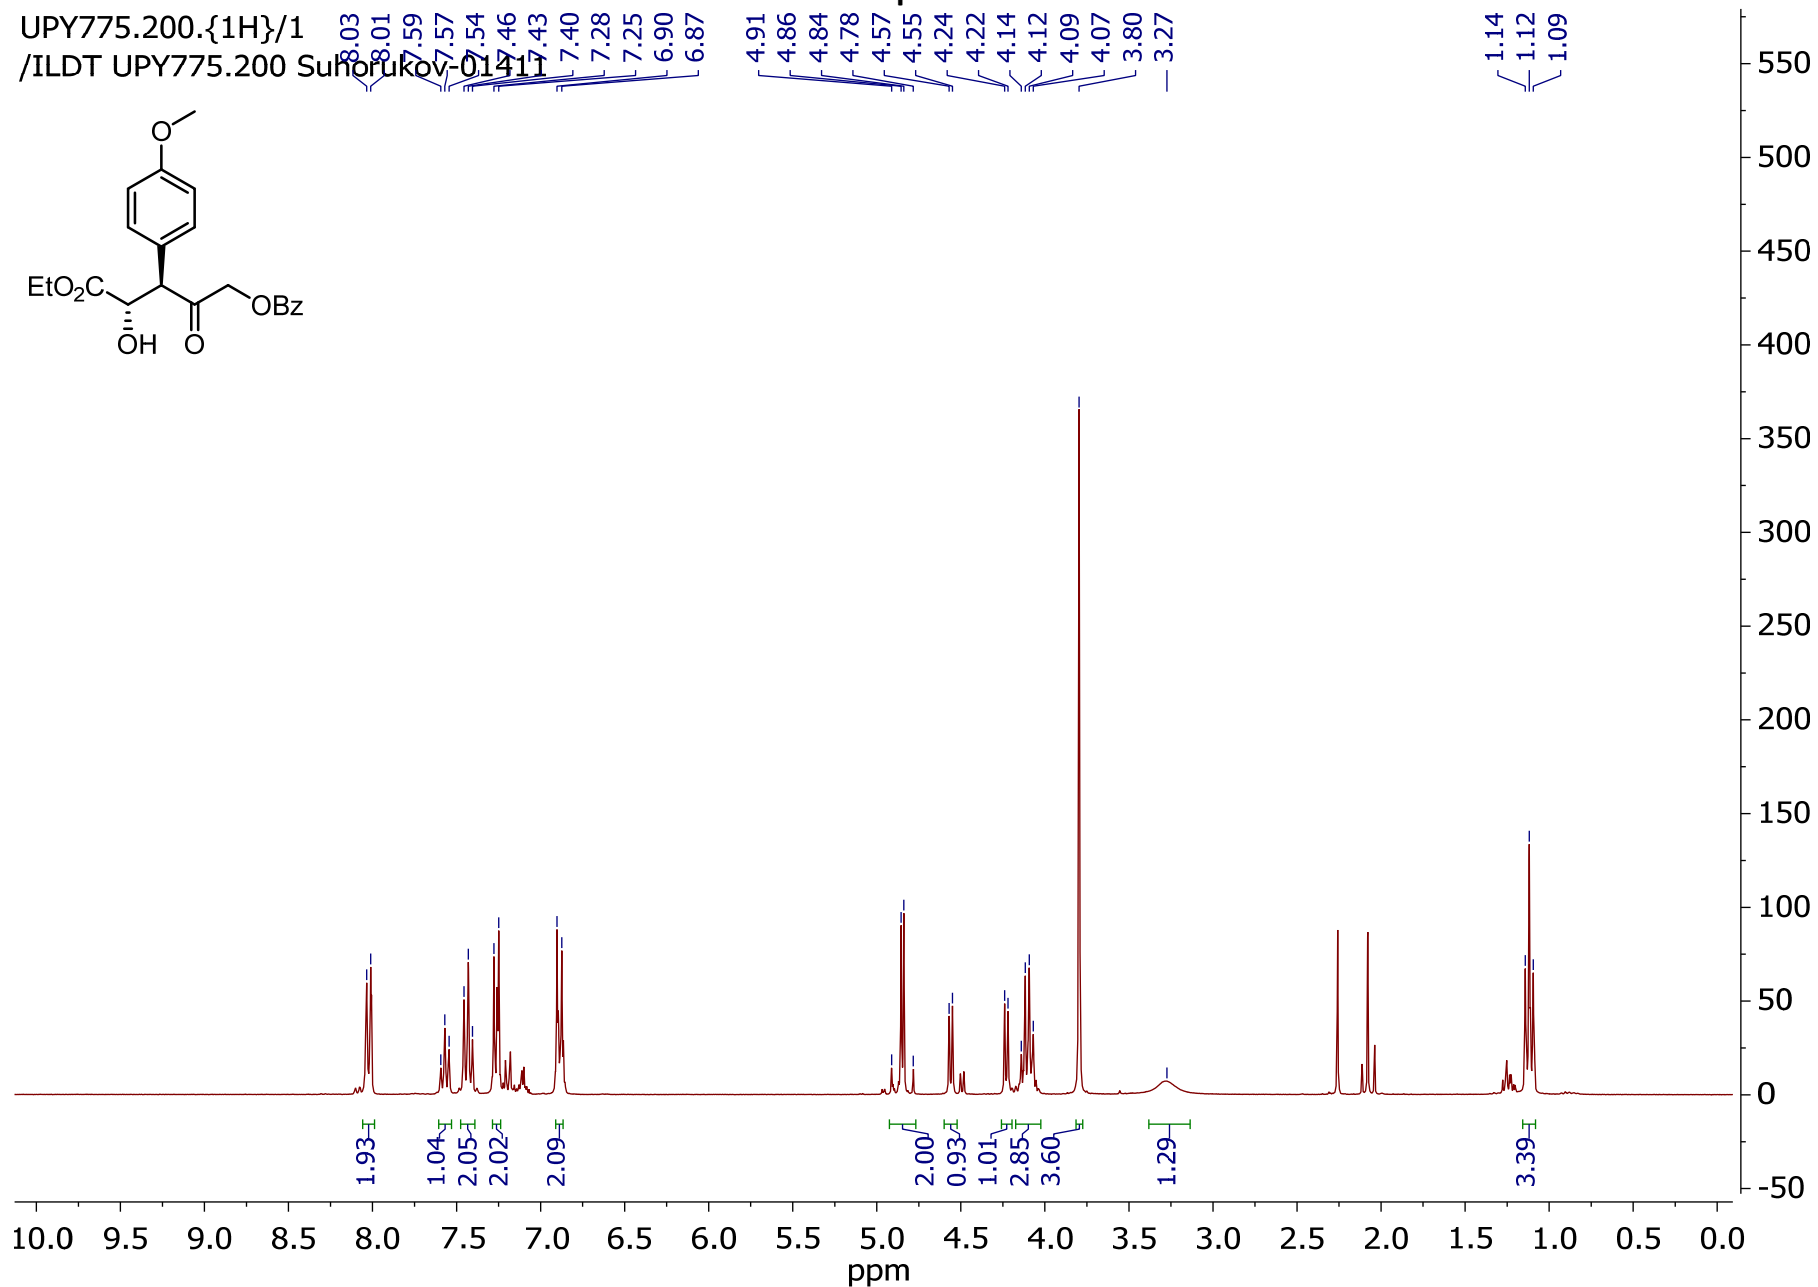

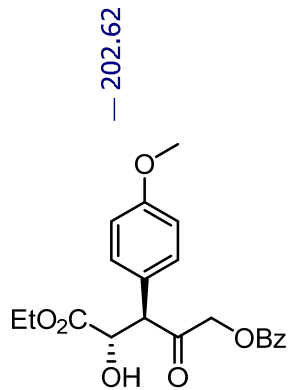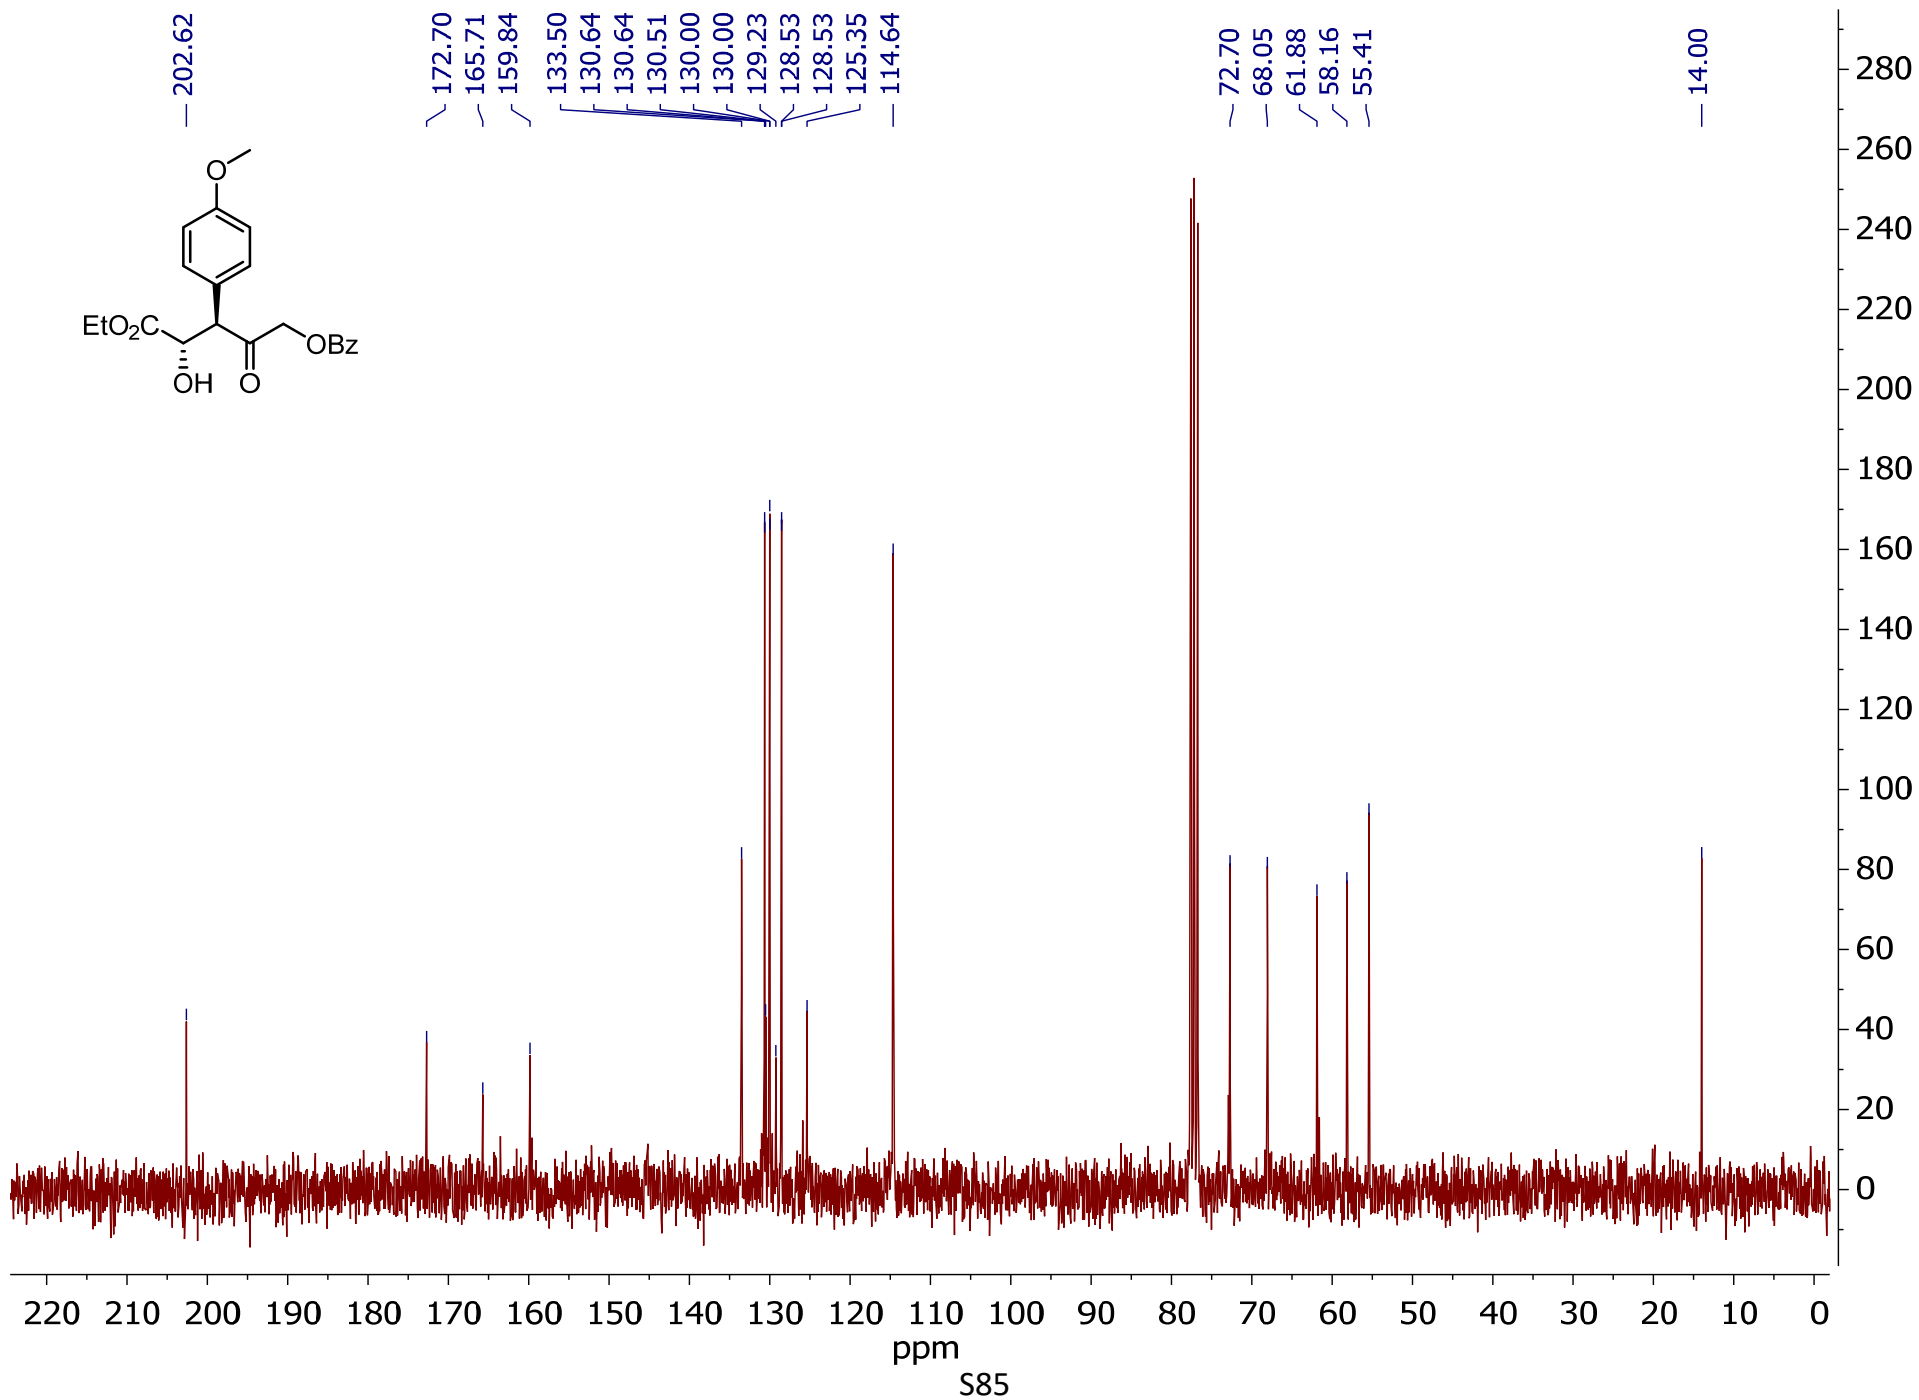

UPY775.200.{13C}deptsp135/3  
/ILD T UPY775.200 Suhorukov-01411

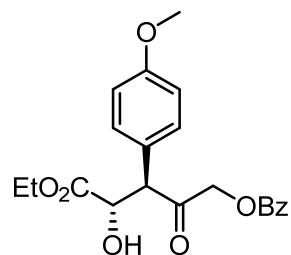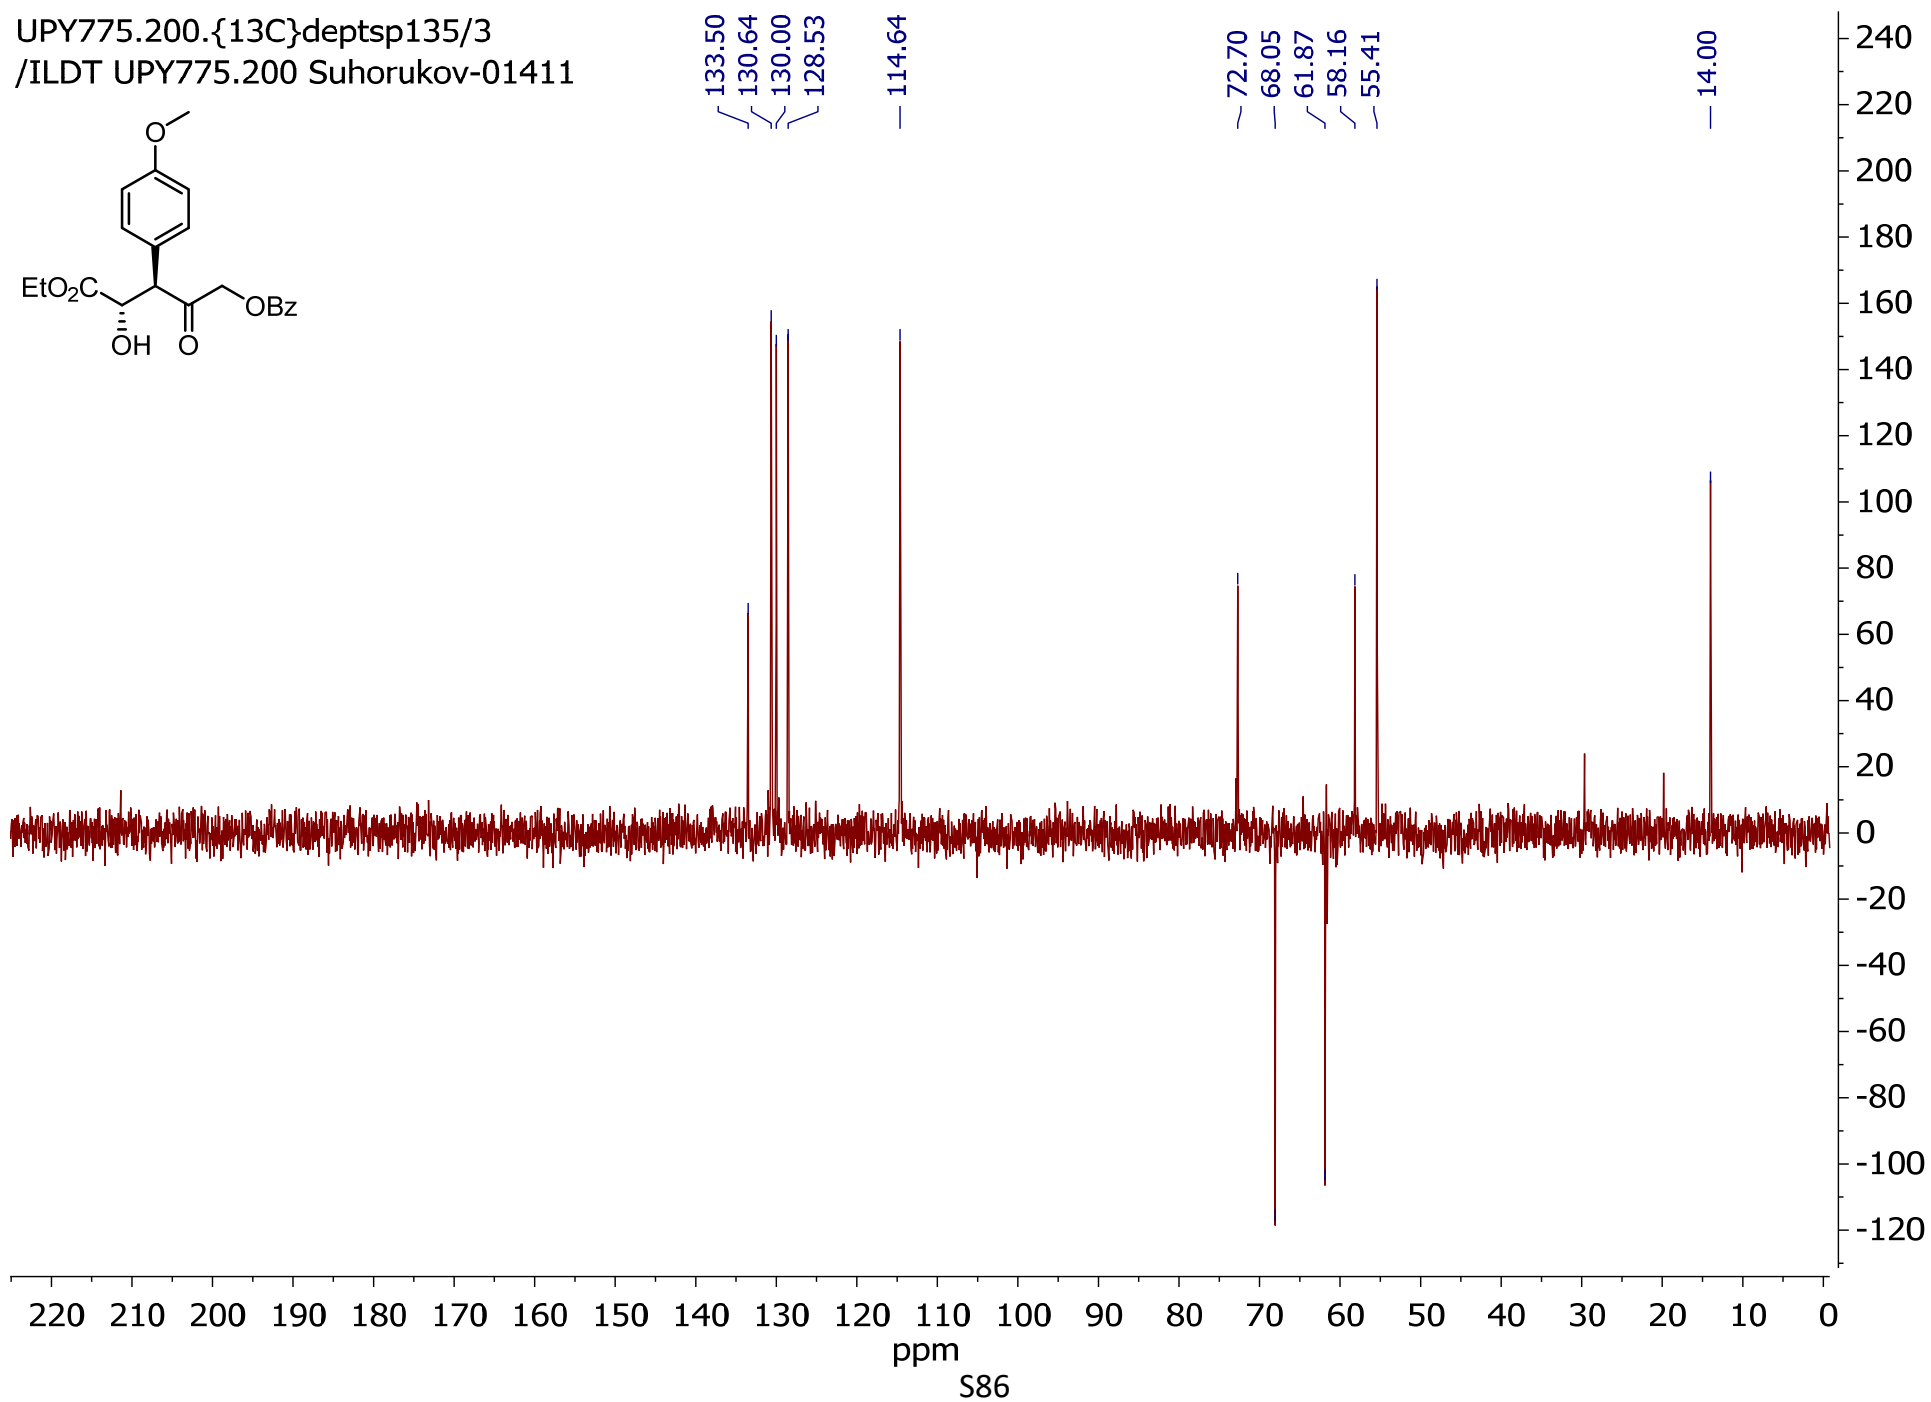



KAA3.100.{1H}/1  
/ILDT KAA3.100 Suhorukov-01411

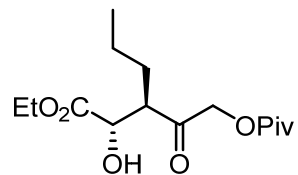

### NMR spectra of 10a

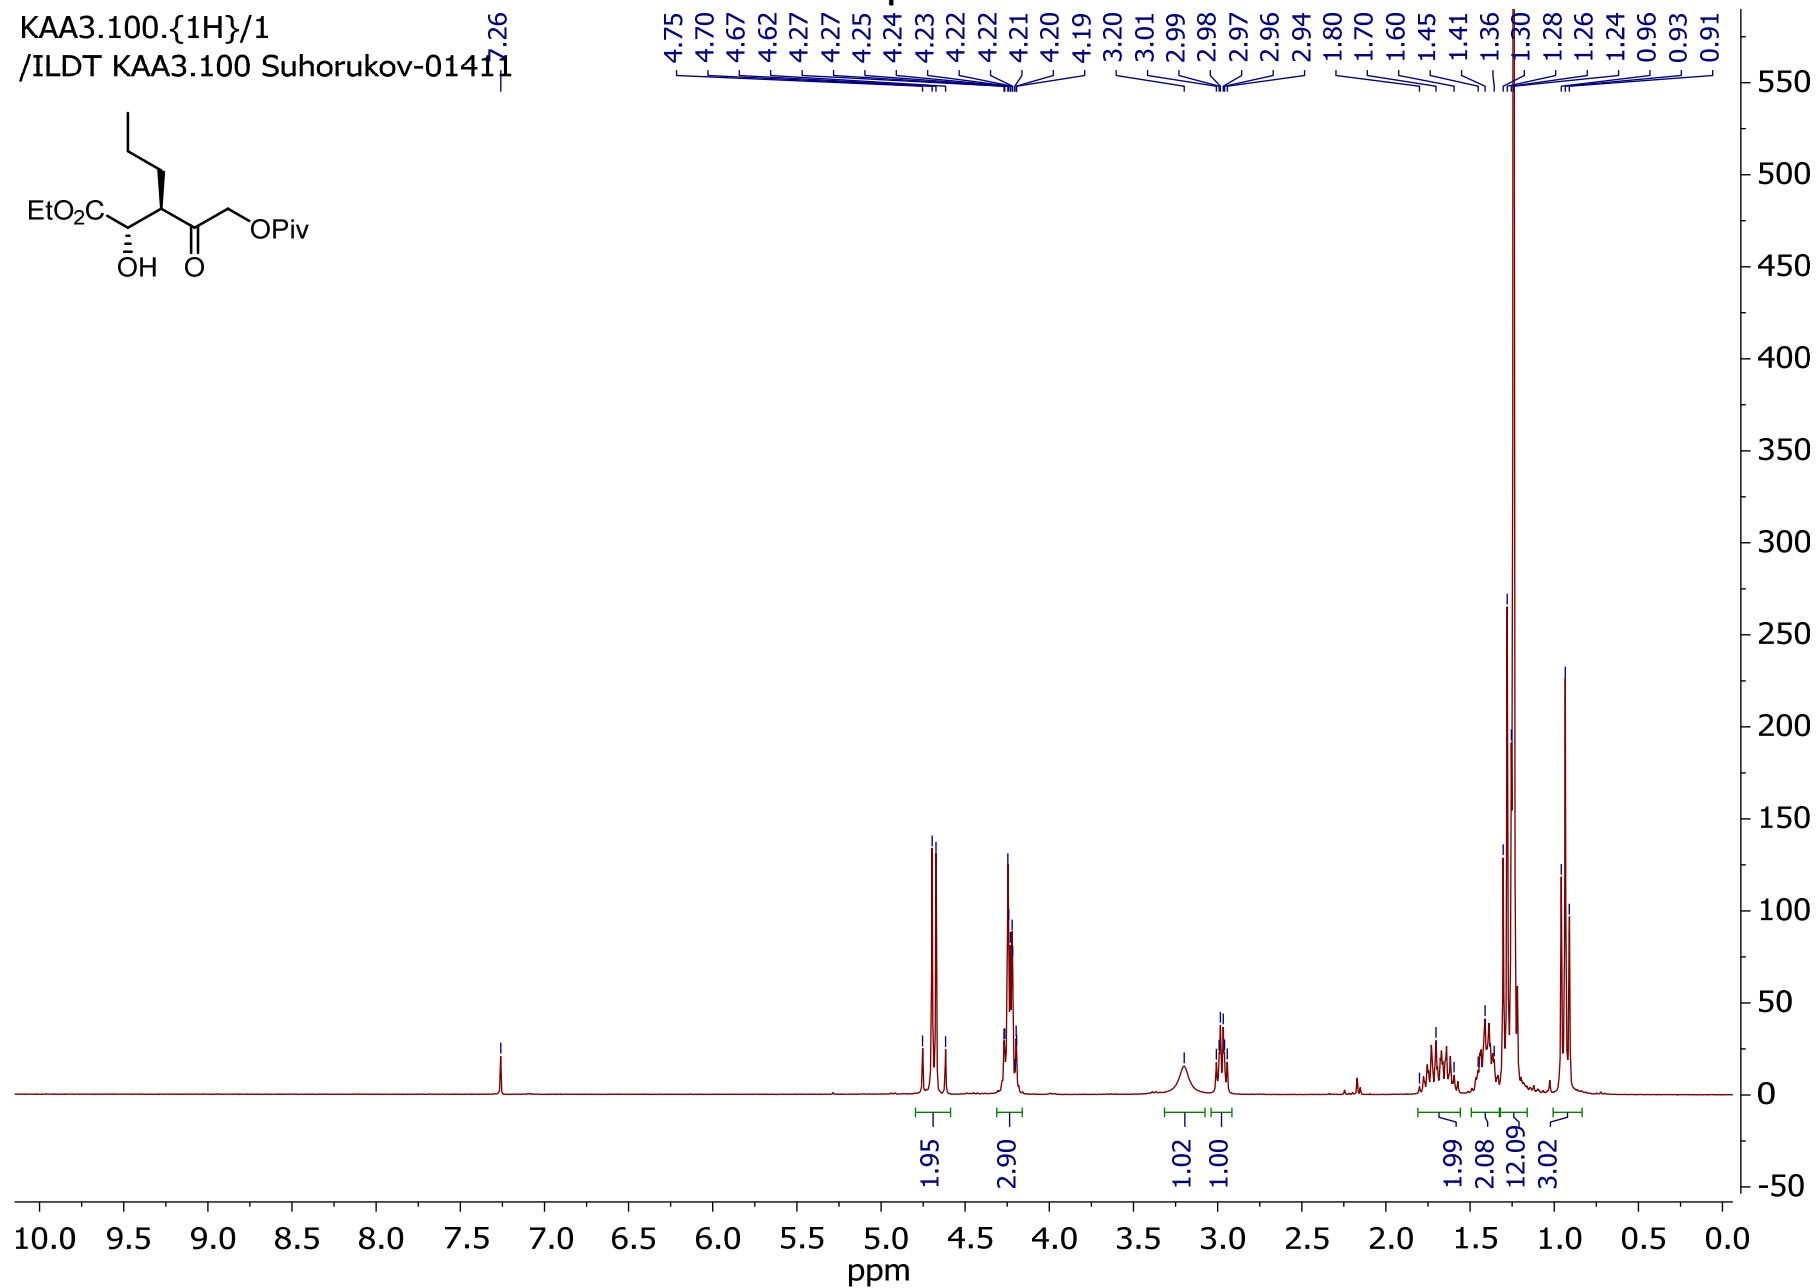



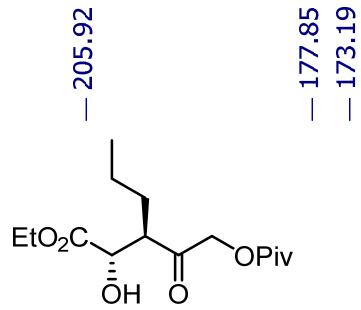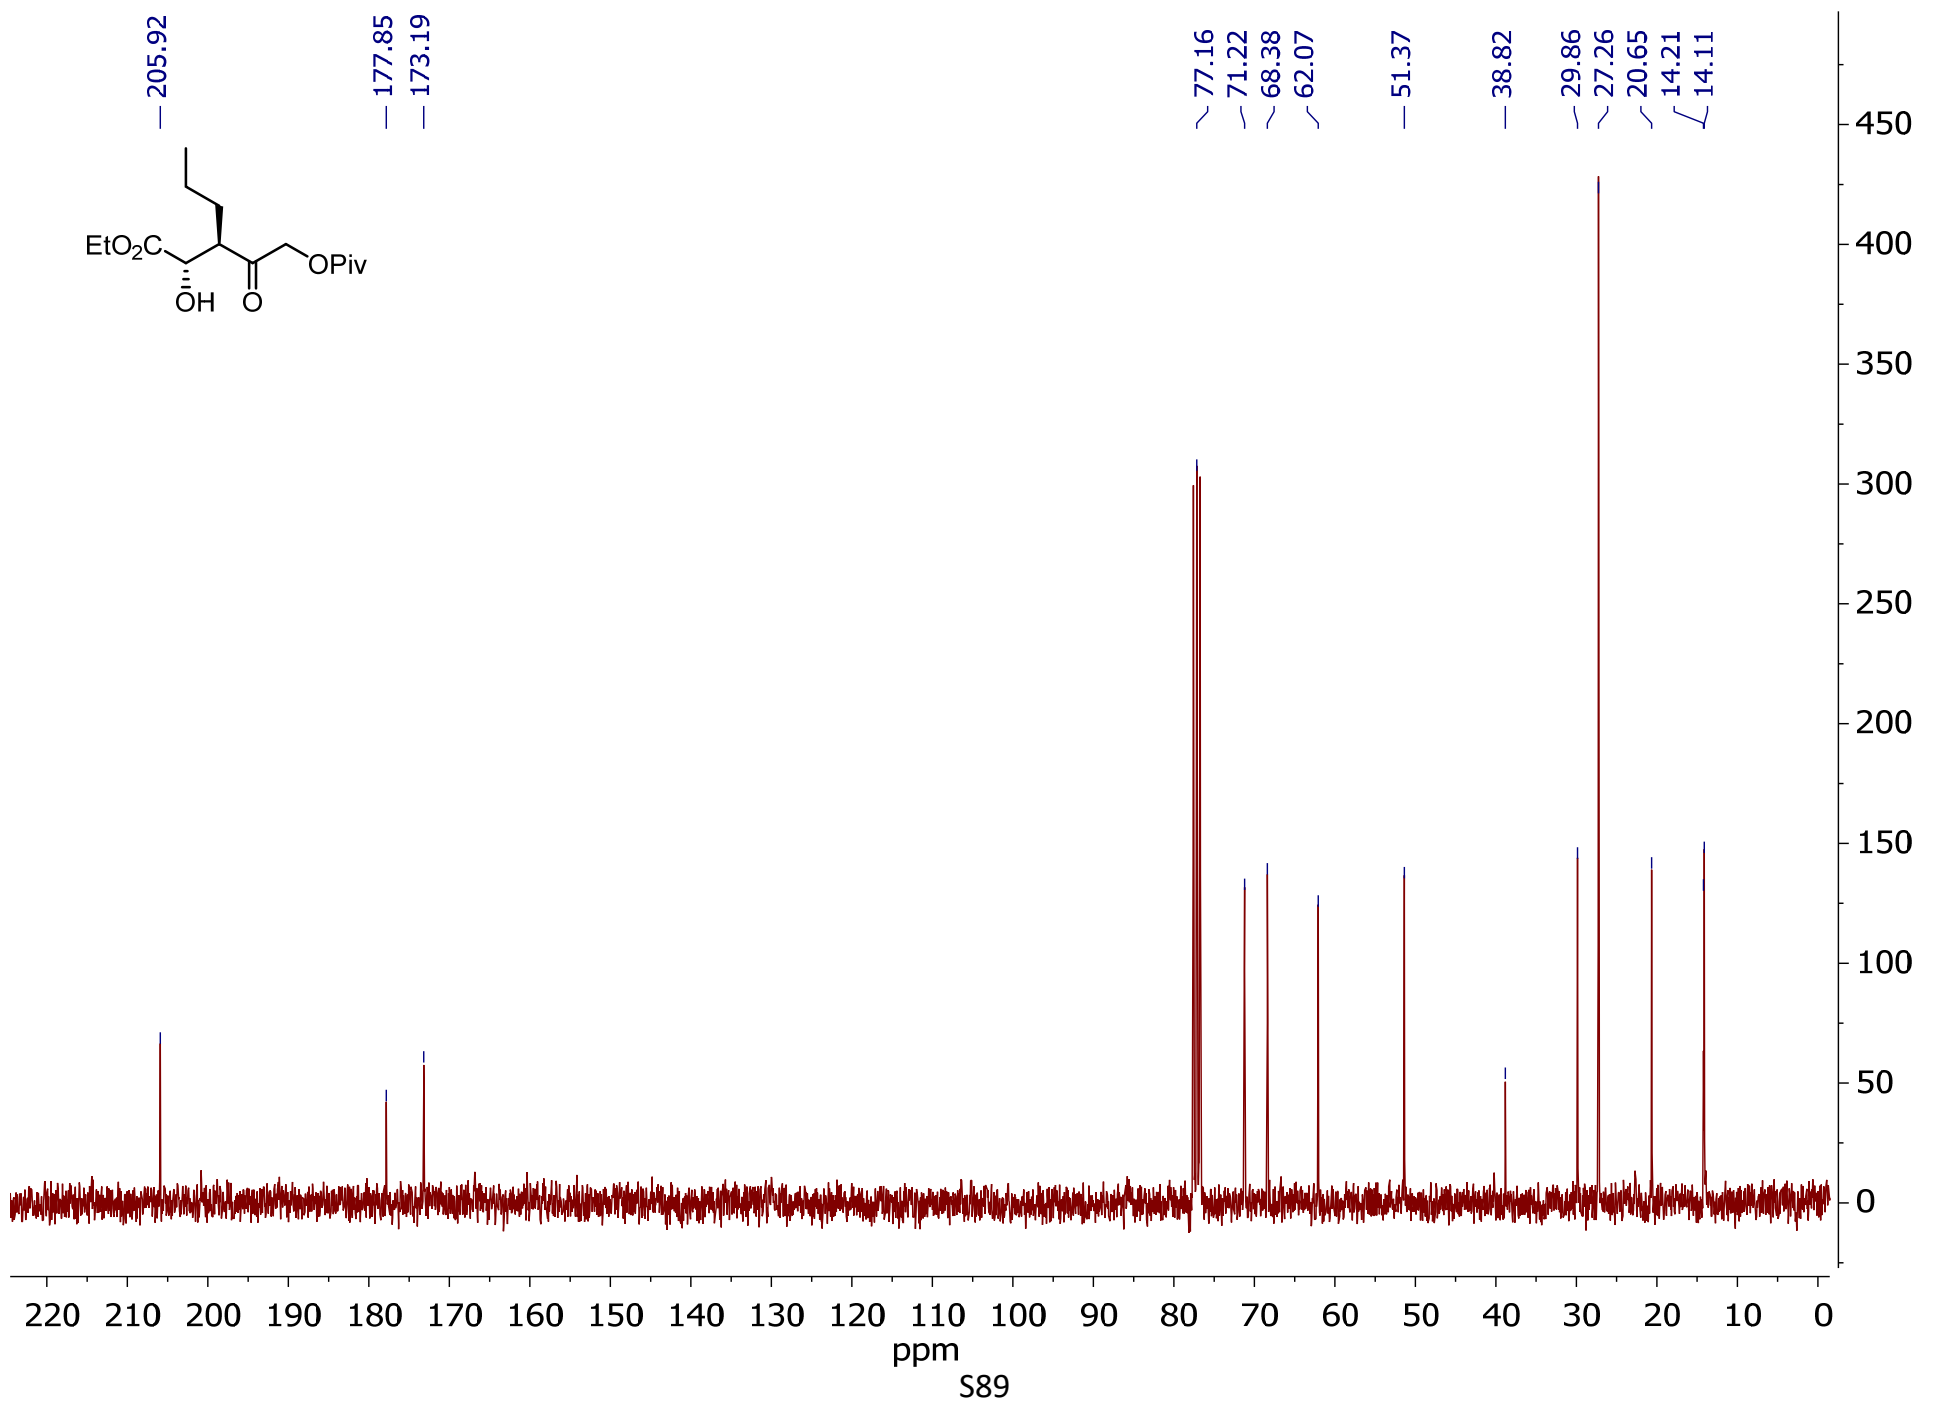

KAA3.100.{13C}deptsp135/3  
/ILDT KAA3.100 Suhorukov-01411

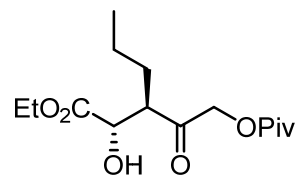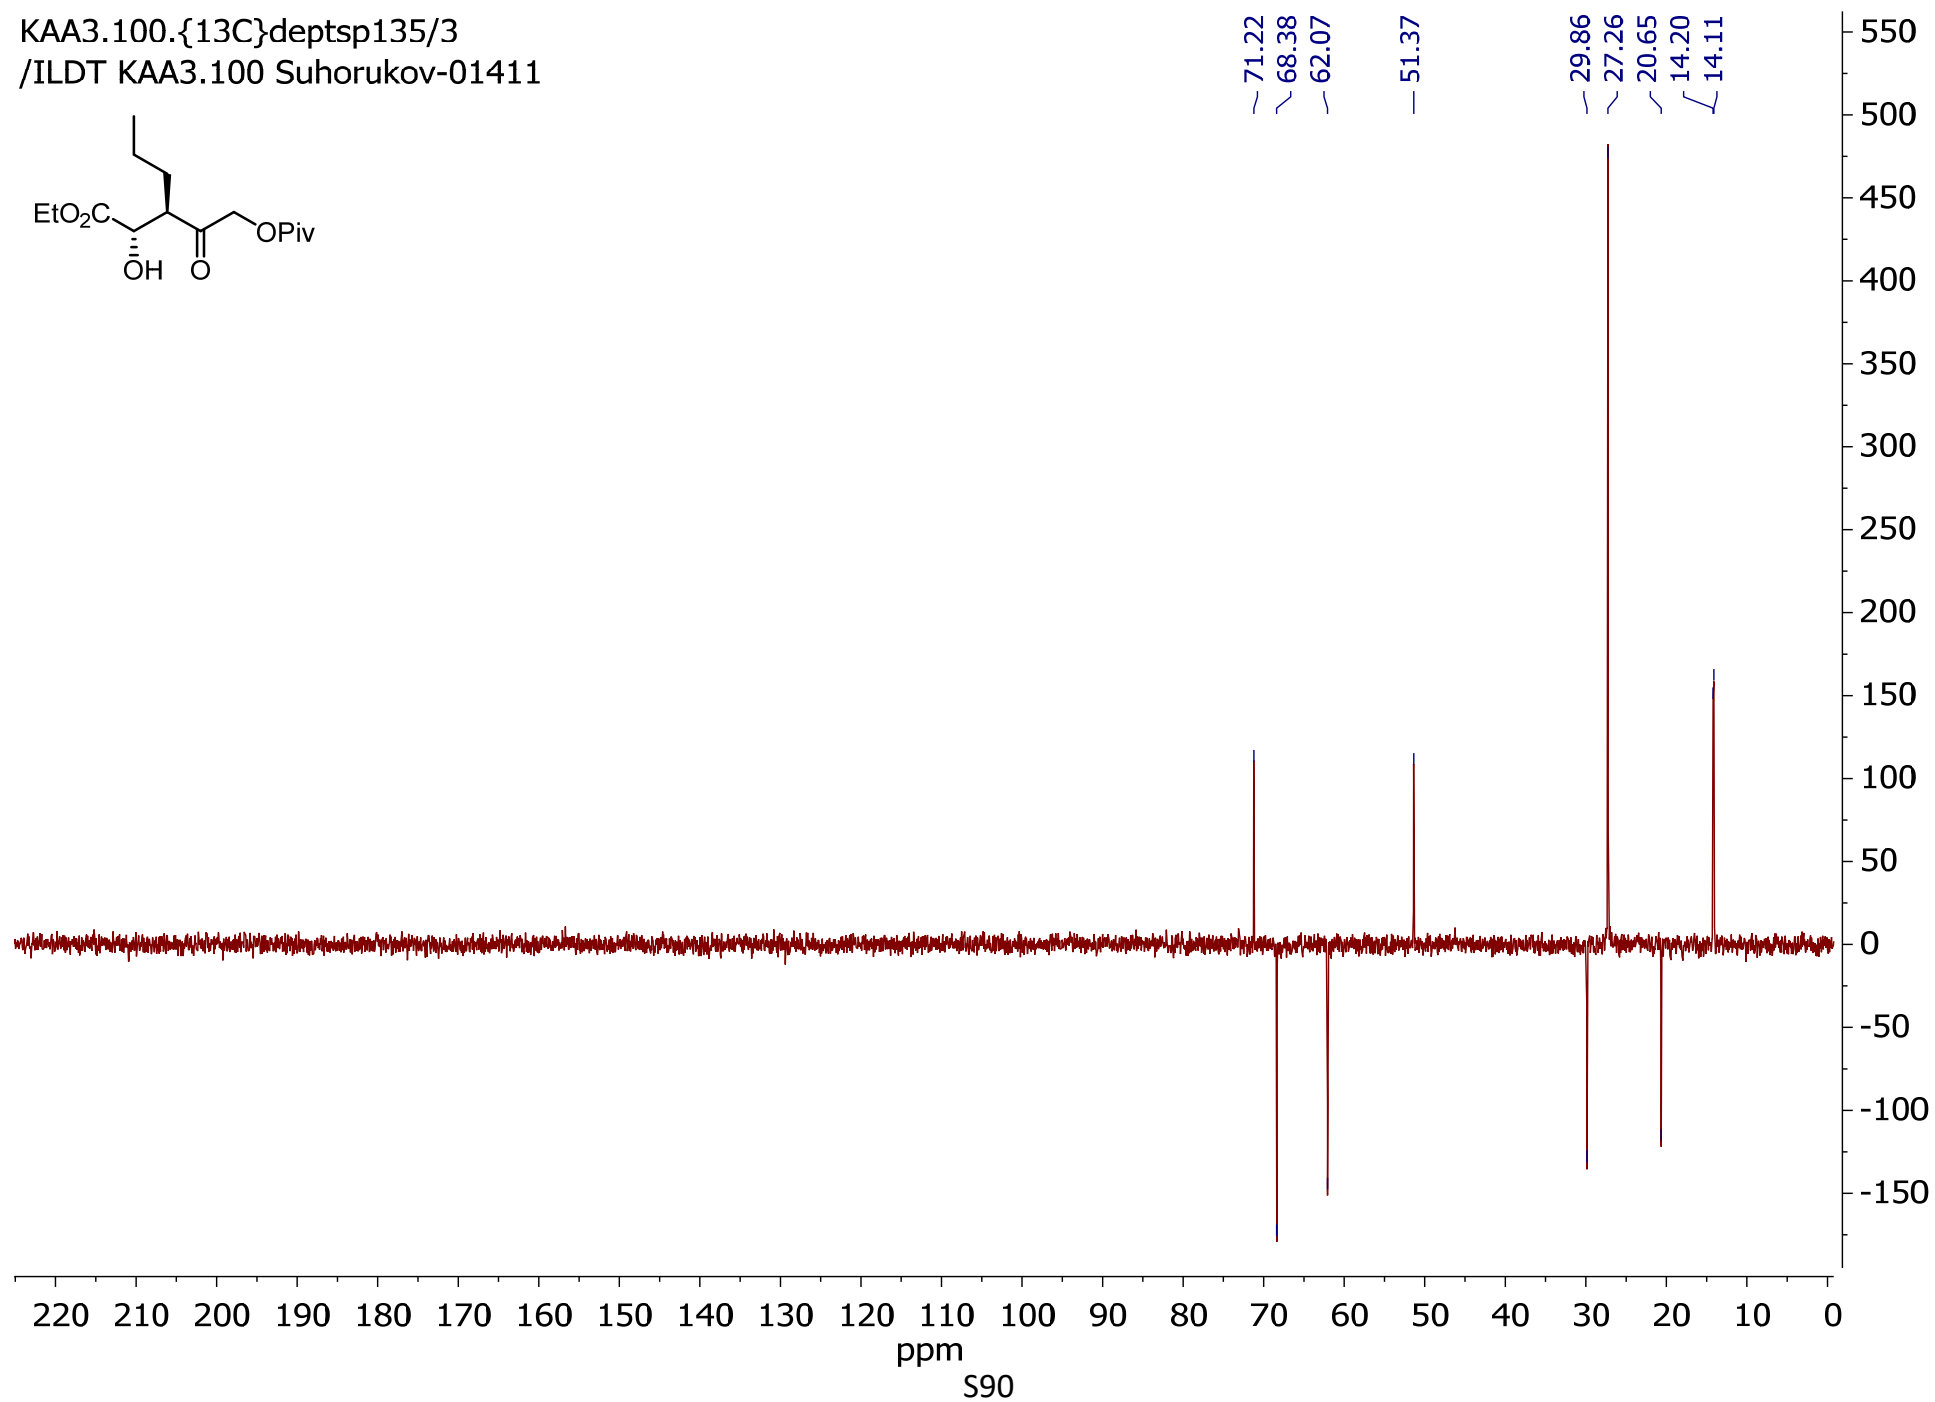

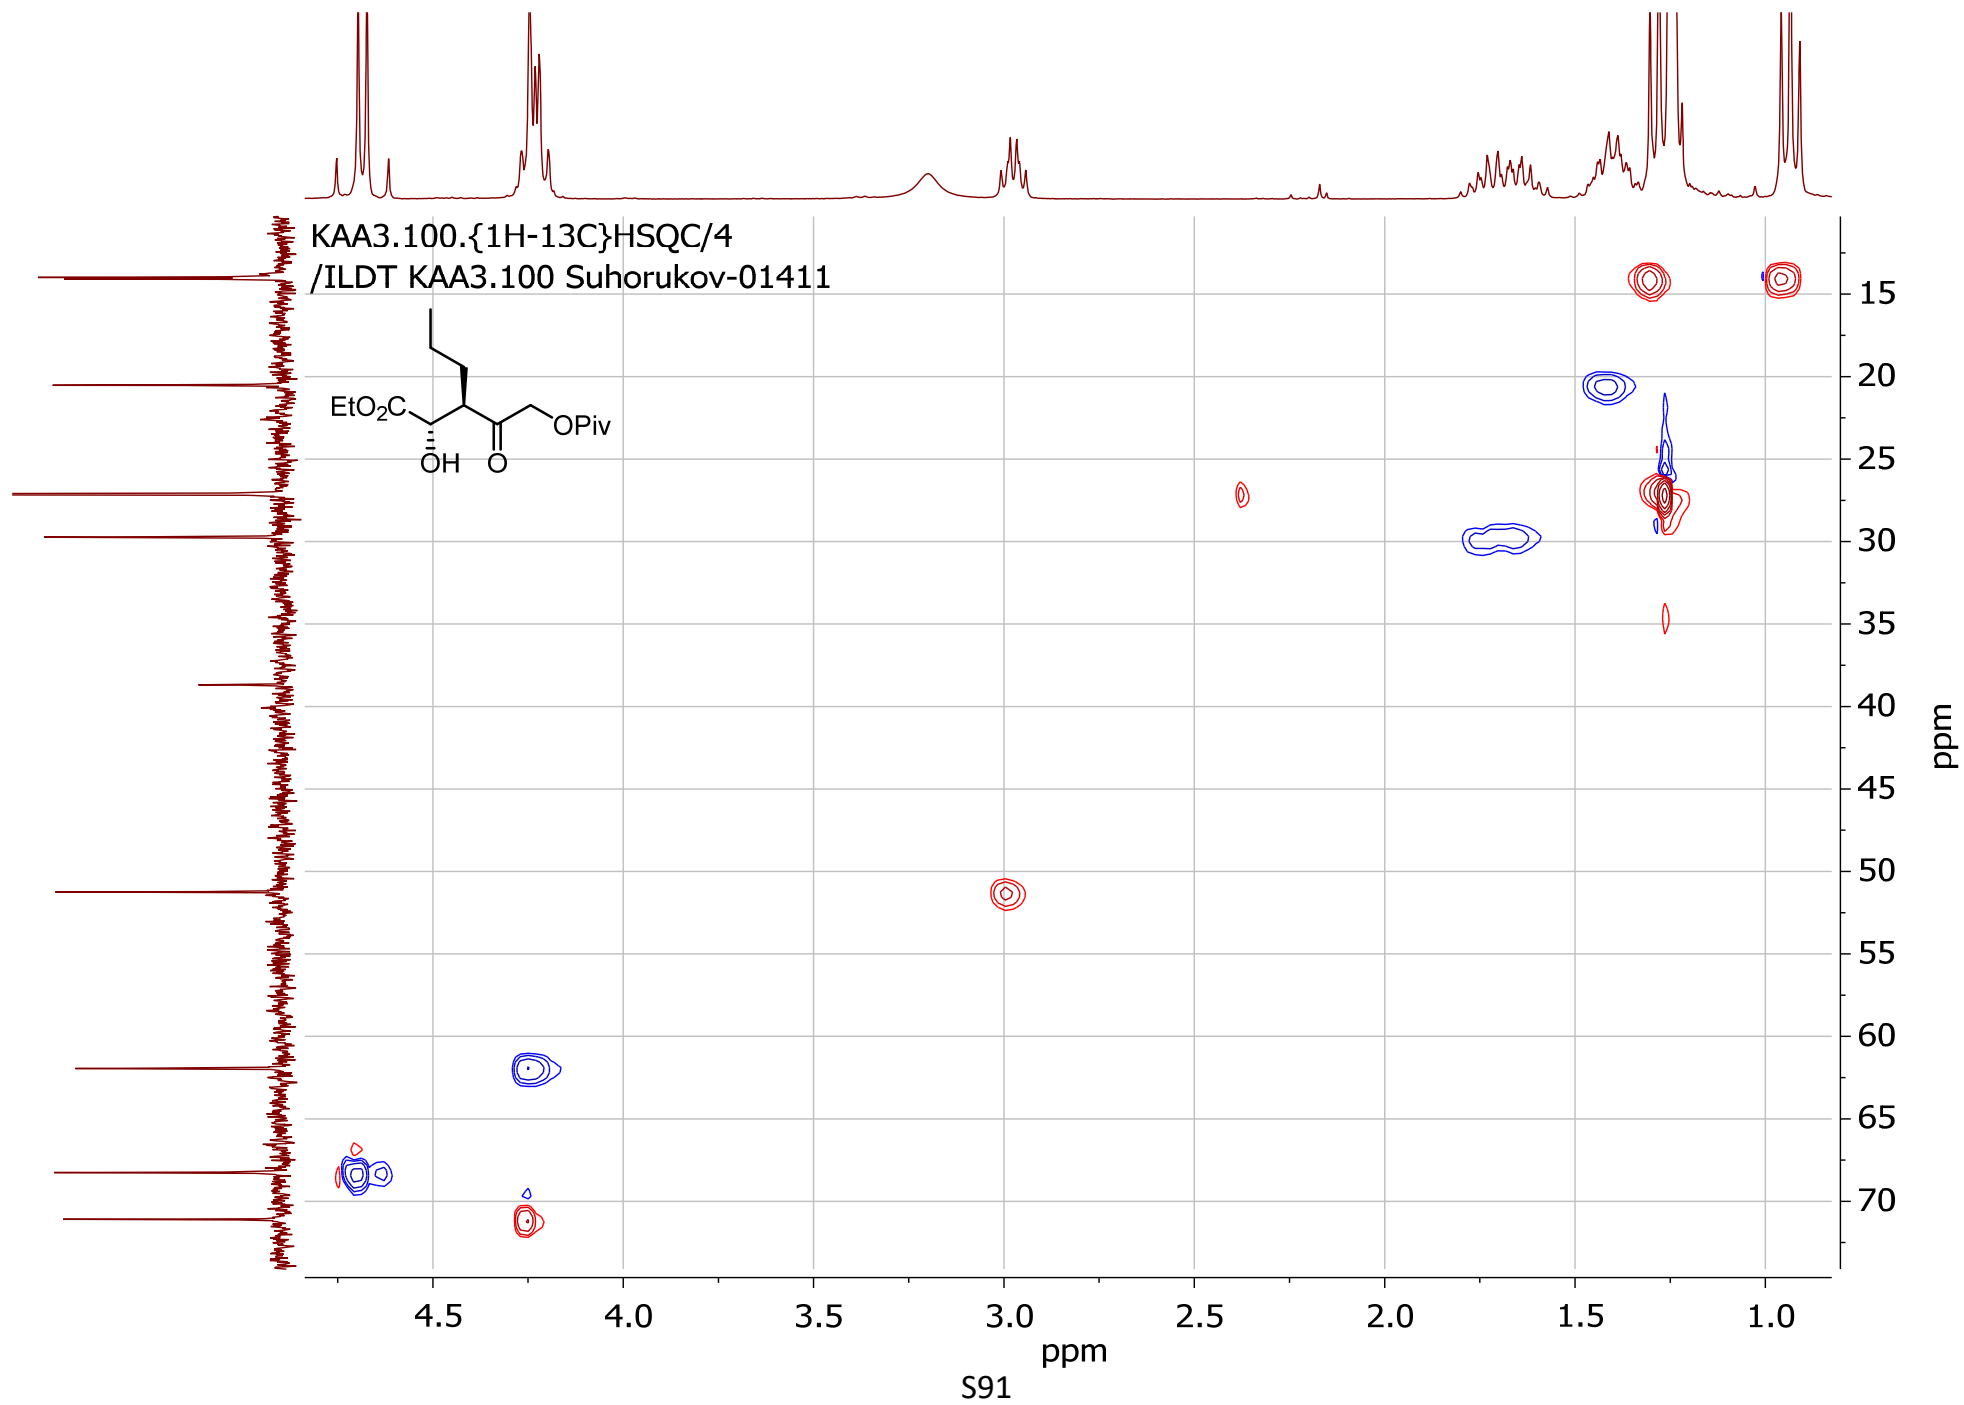

UPY807.100.{1H}/1  
/ILDY UPY807.100 Suhorukov-HD-37-21

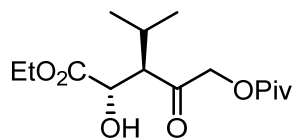

### NMR spectra of 10b

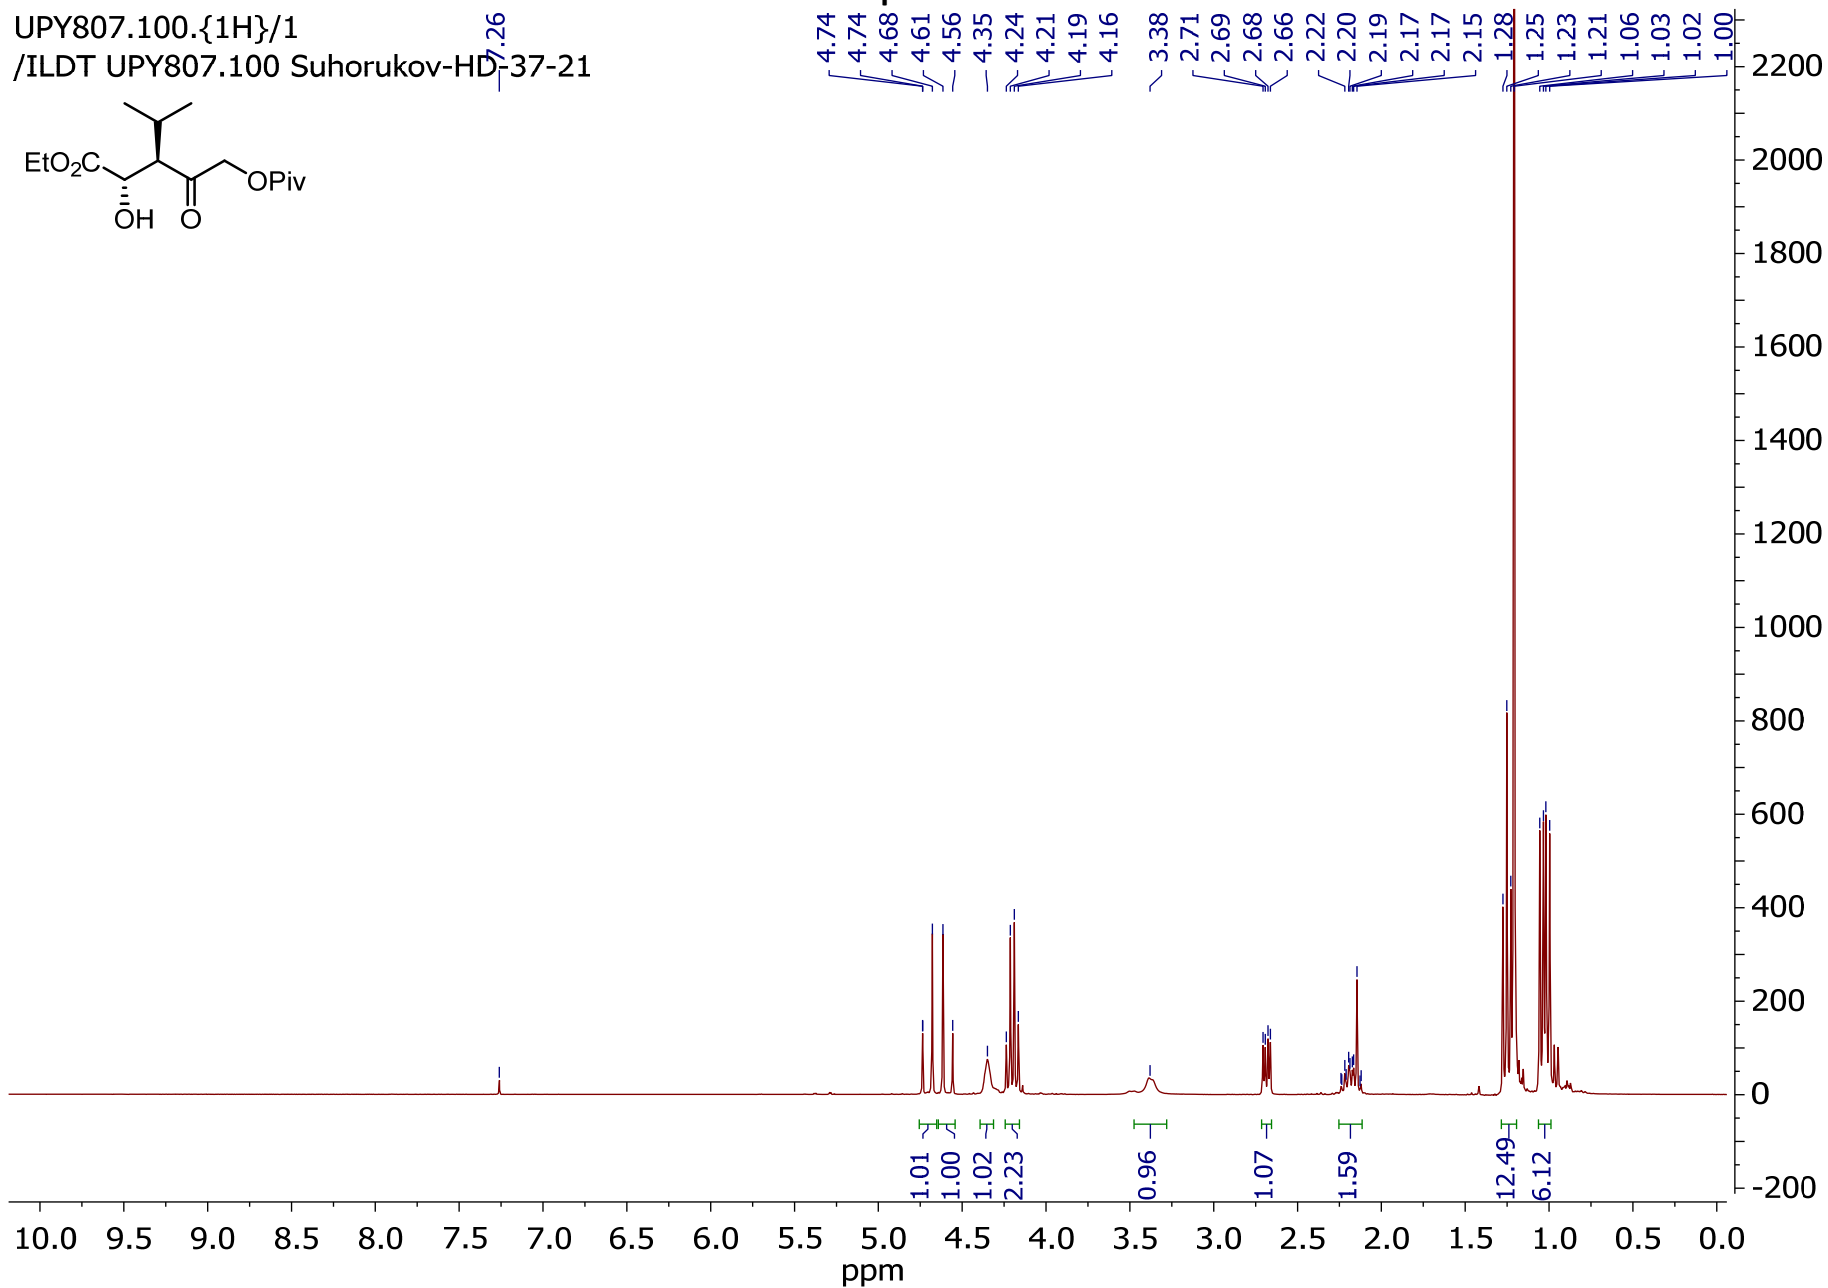





UPY793.100.{1H}/1  
/ILDY UPY793.100 Suhorukov-01411

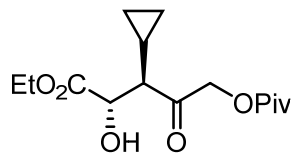

### NMR spectra of 10c

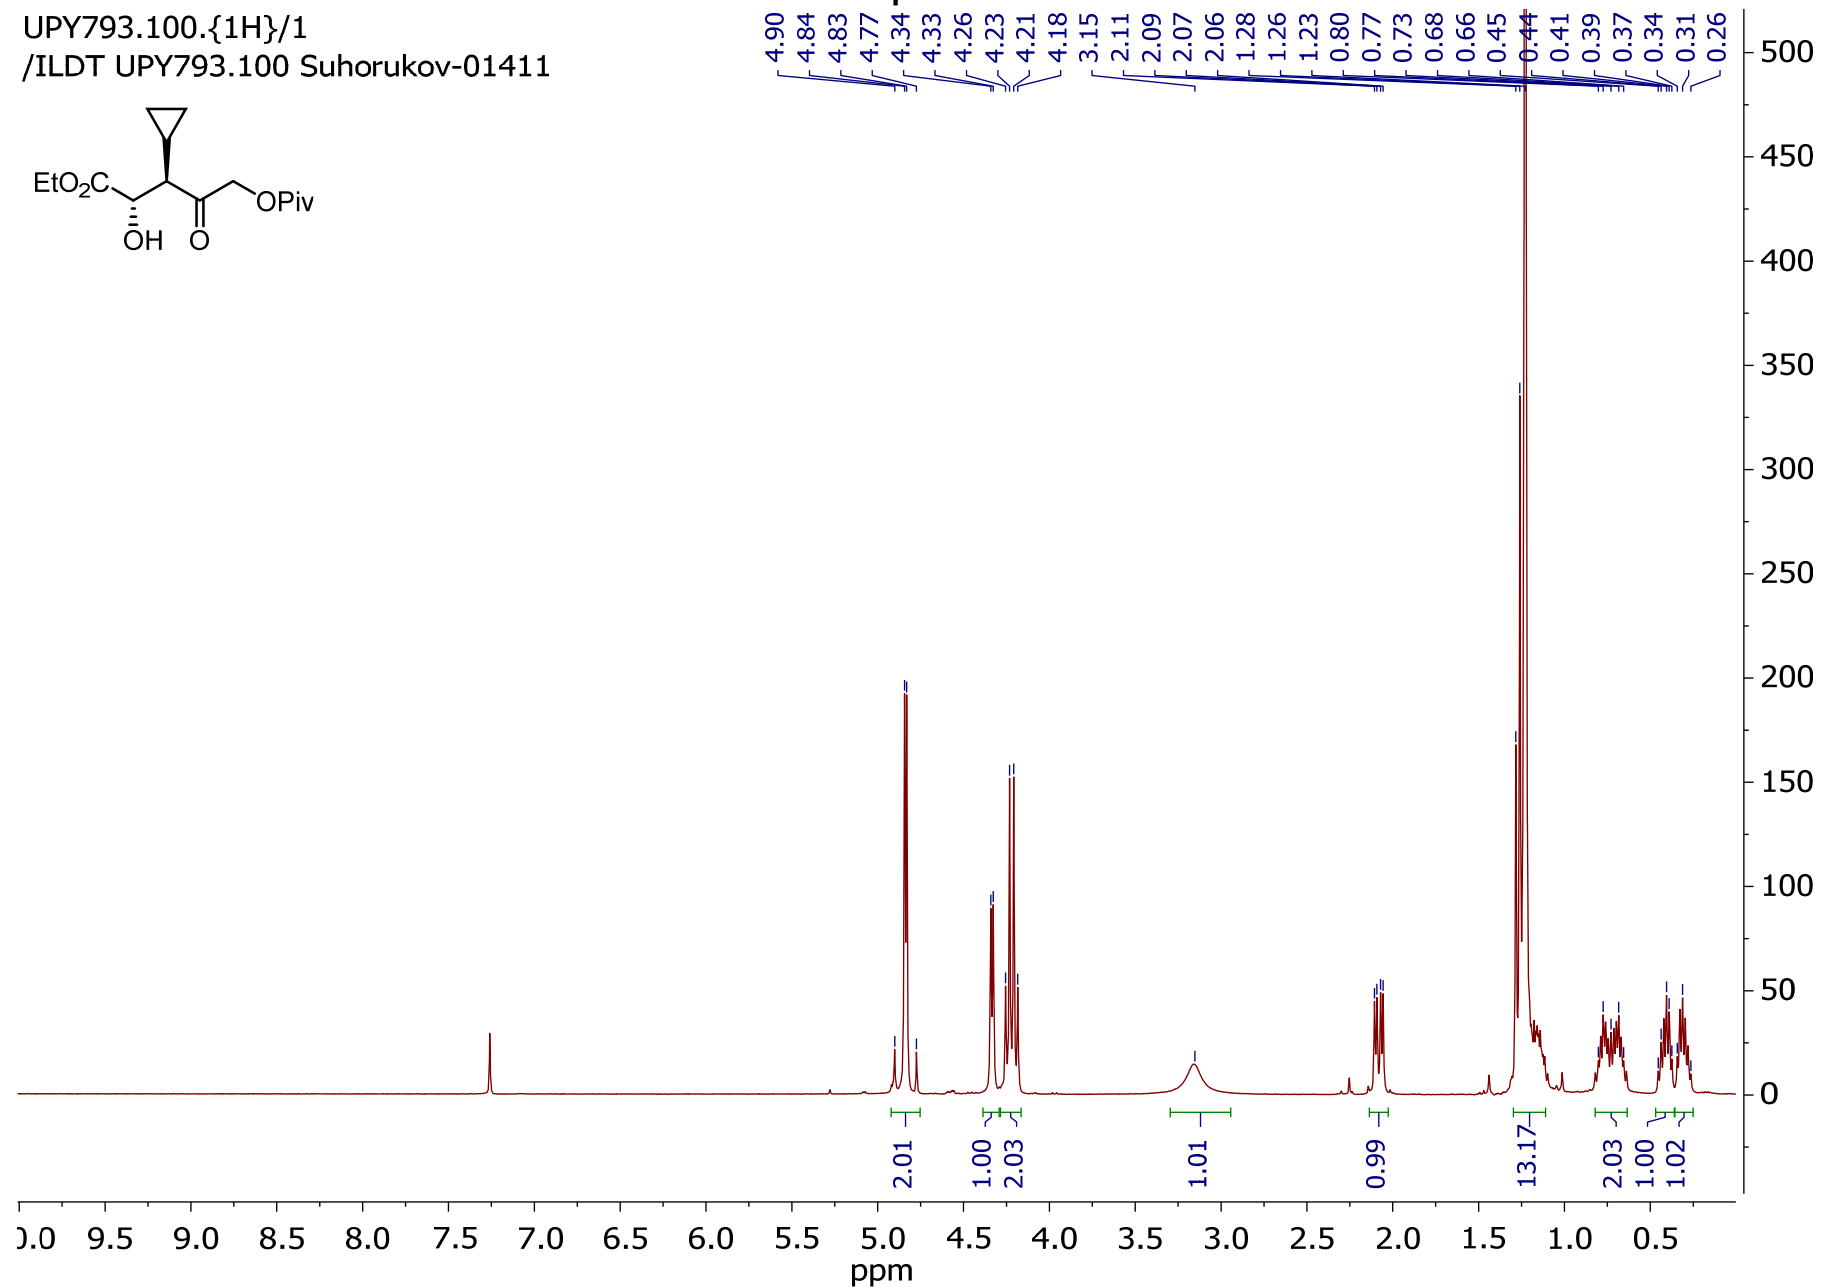

UPY793.100.{13C}/2  
/ILDT UPY793.100 Suhrkov-01411

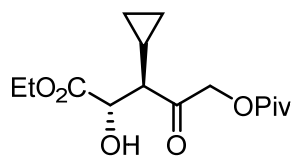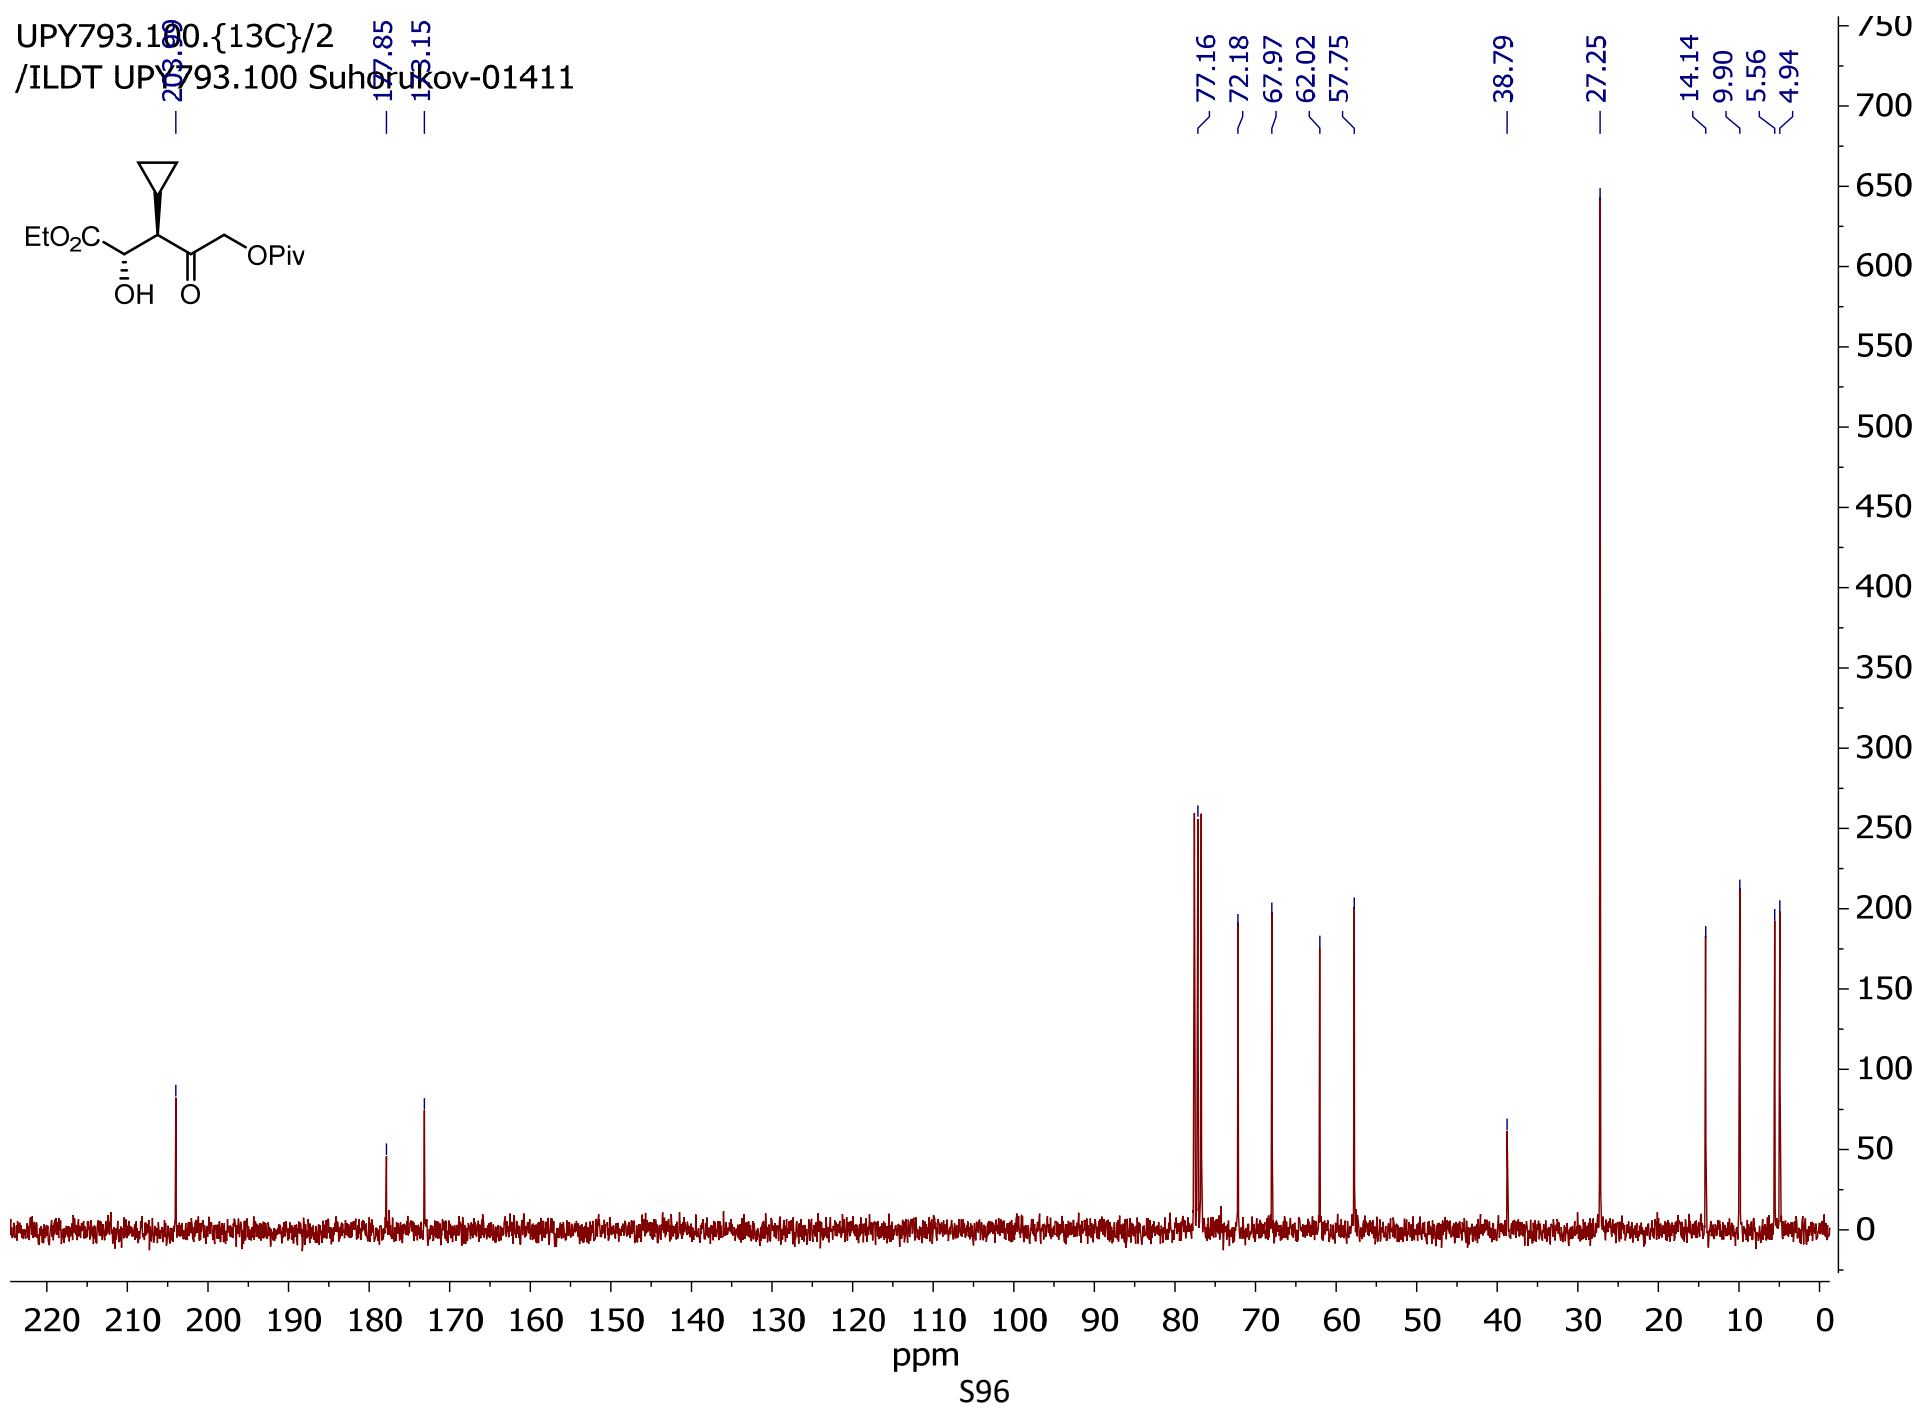



UPY793.100.{13C}deptsp135/3  
/ILDIT UPY793.100 Suhorukov-01411

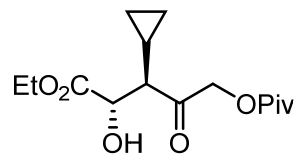

72.18  
67.97  
62.02  
57.76

27.25

14.14  
9.90  
5.57  
4.94

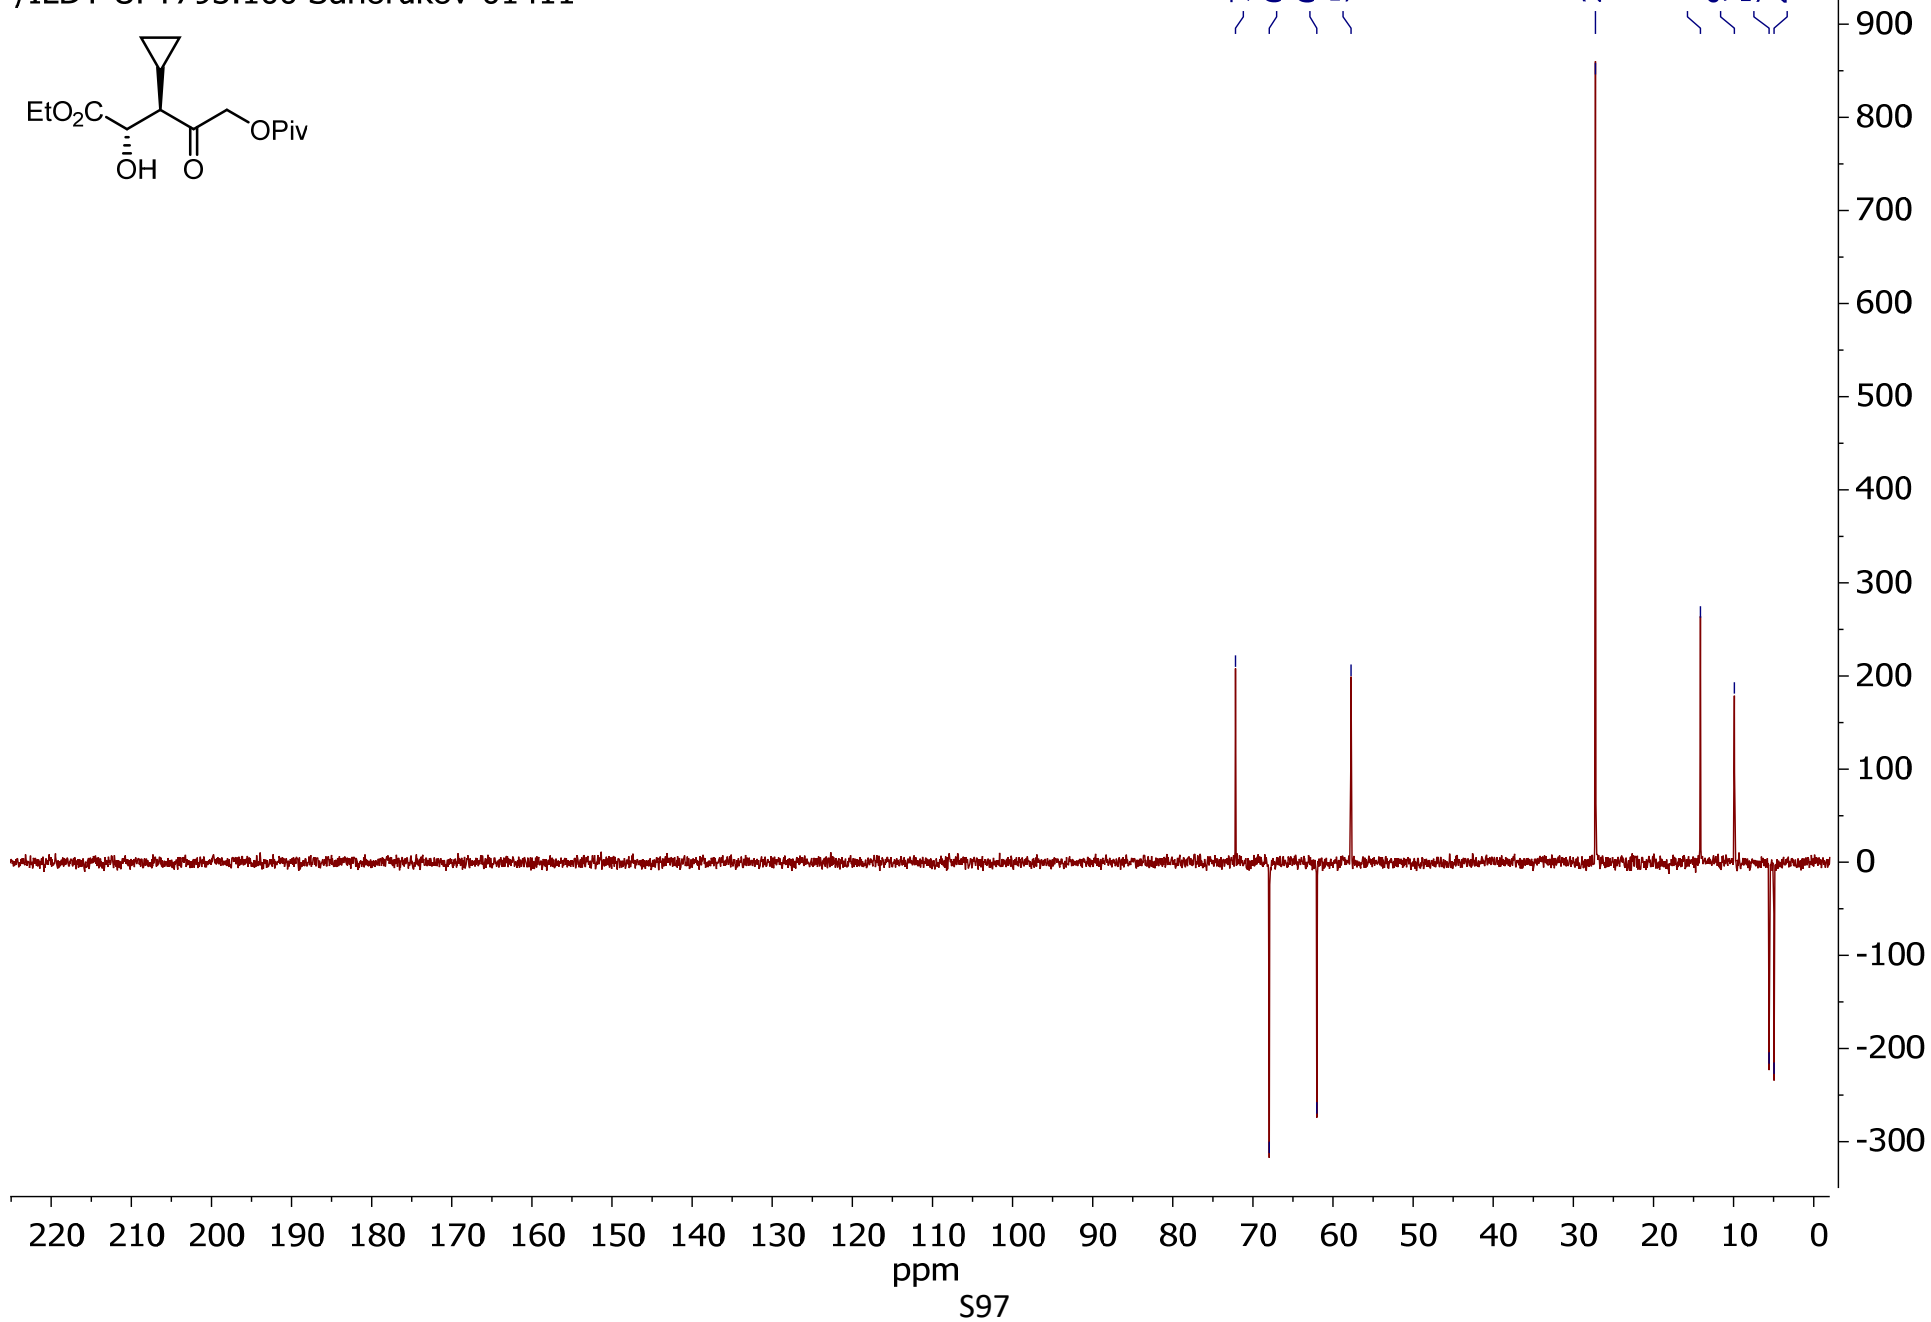

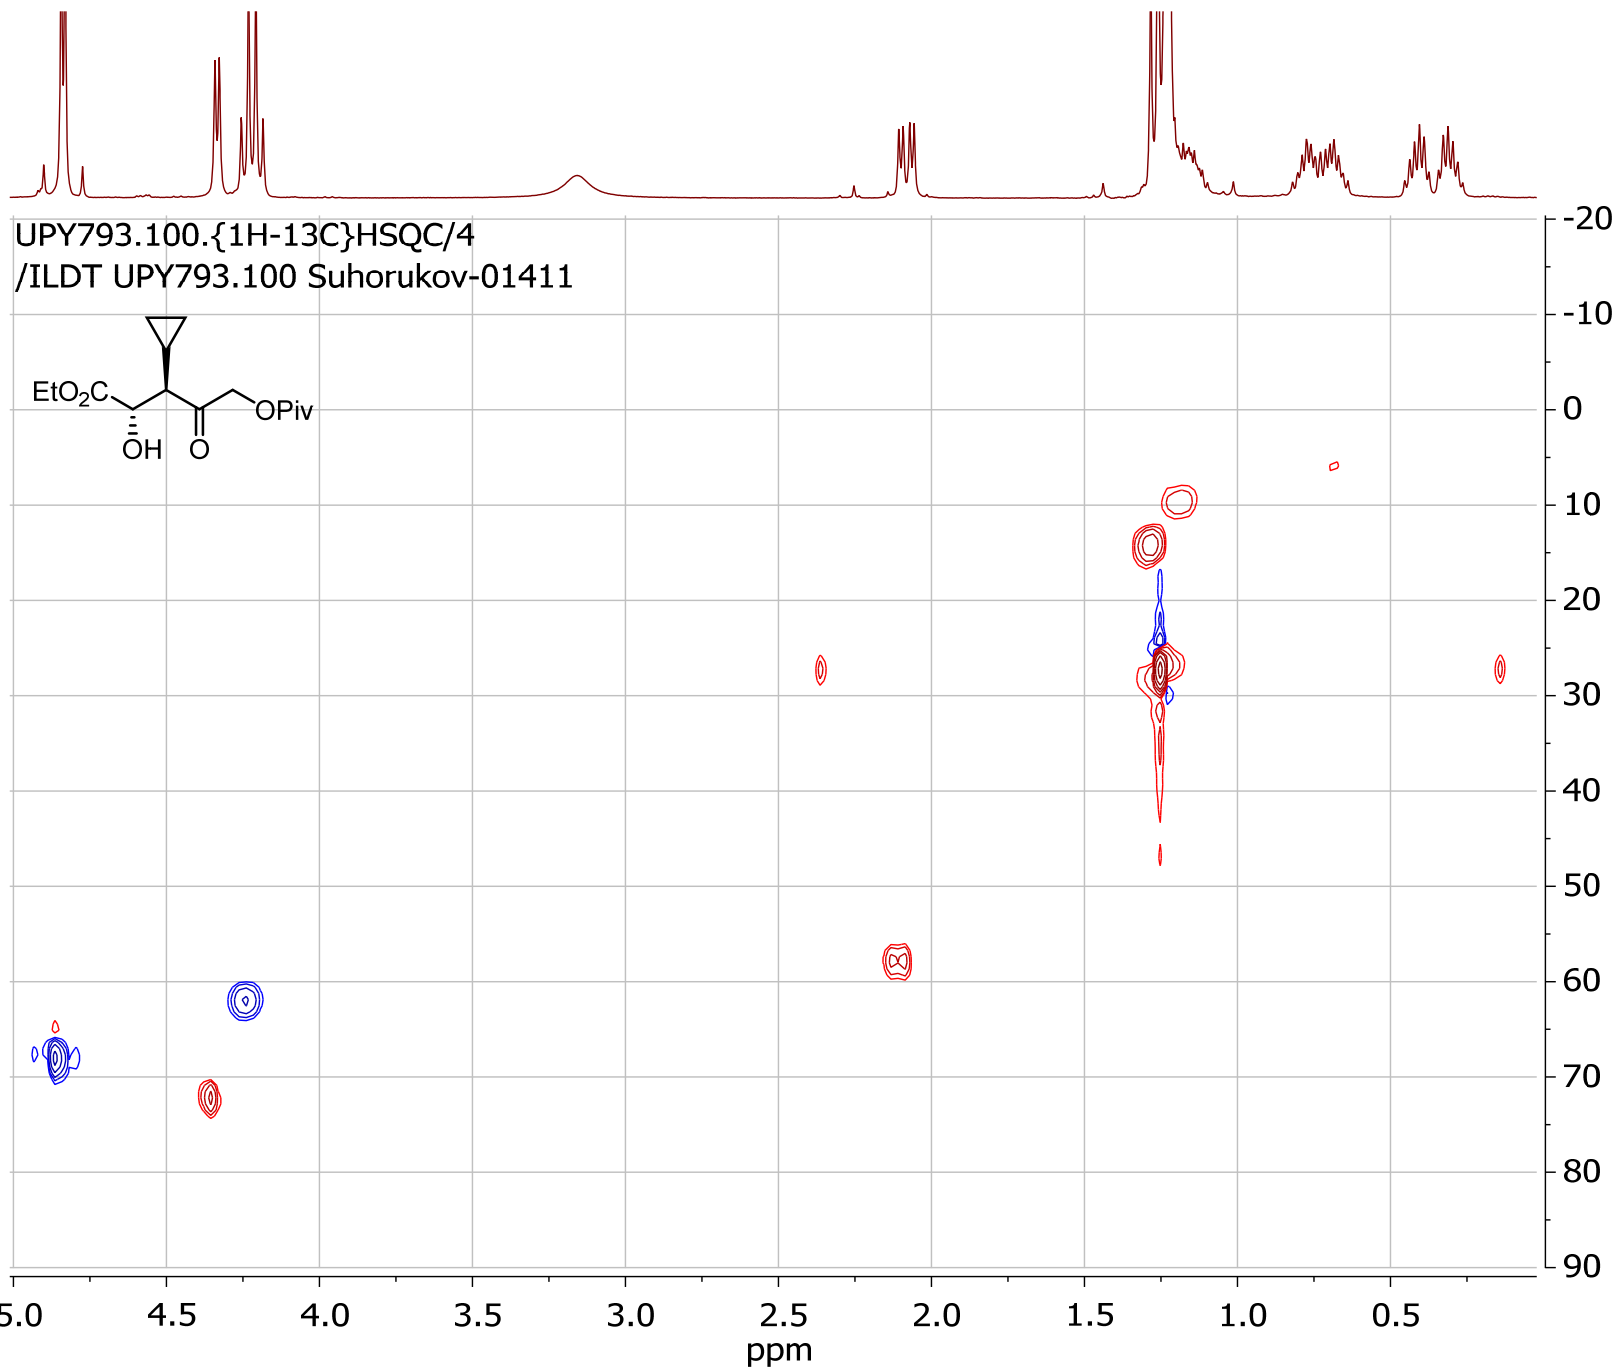

UPY841.100.{1H}/1  
/ILDT UPY841.100

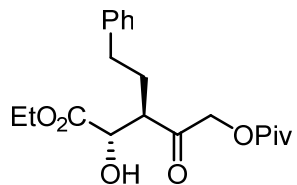

### NMR spectra of 10d

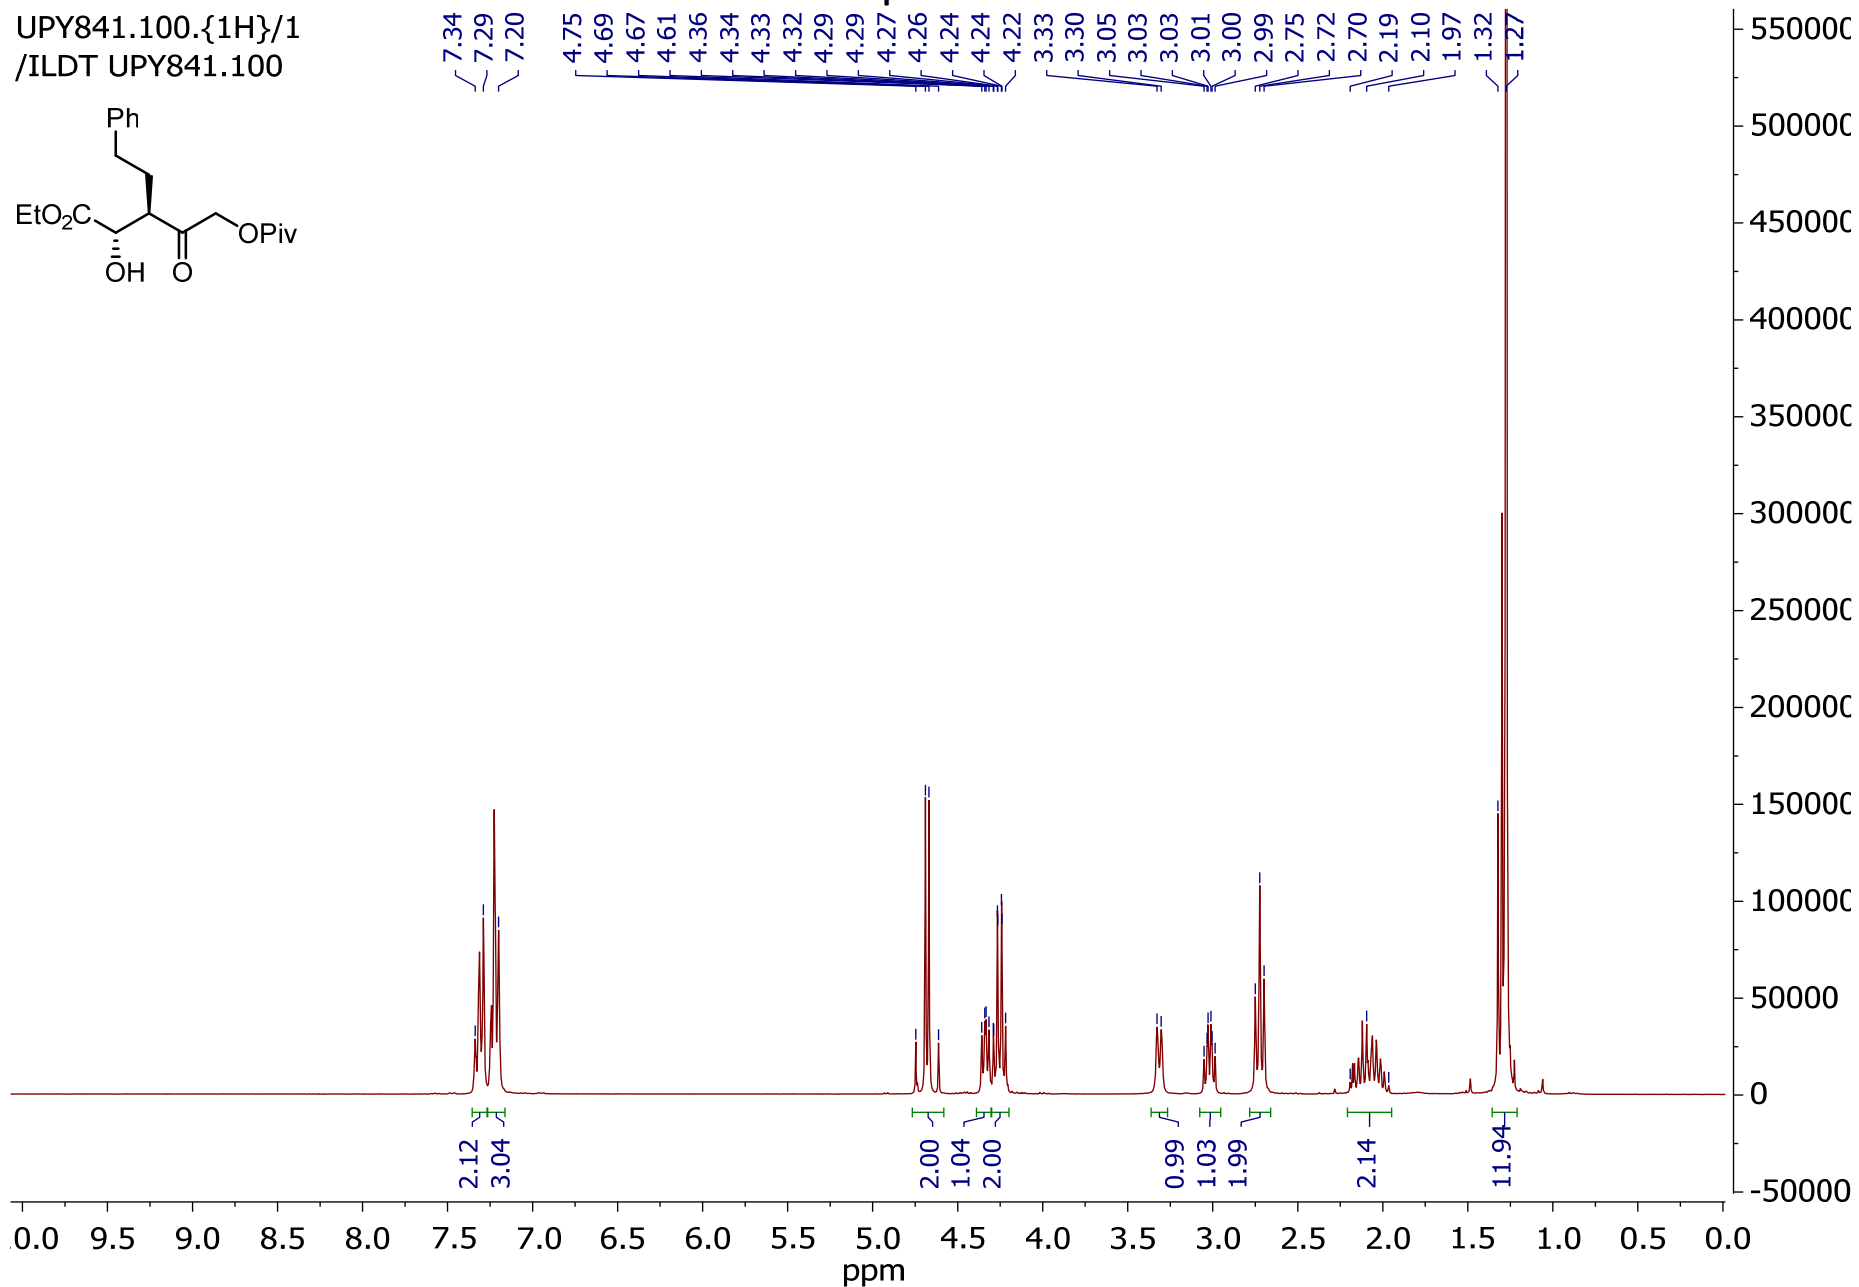

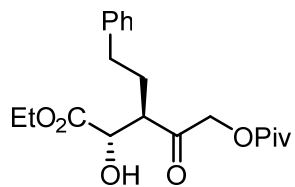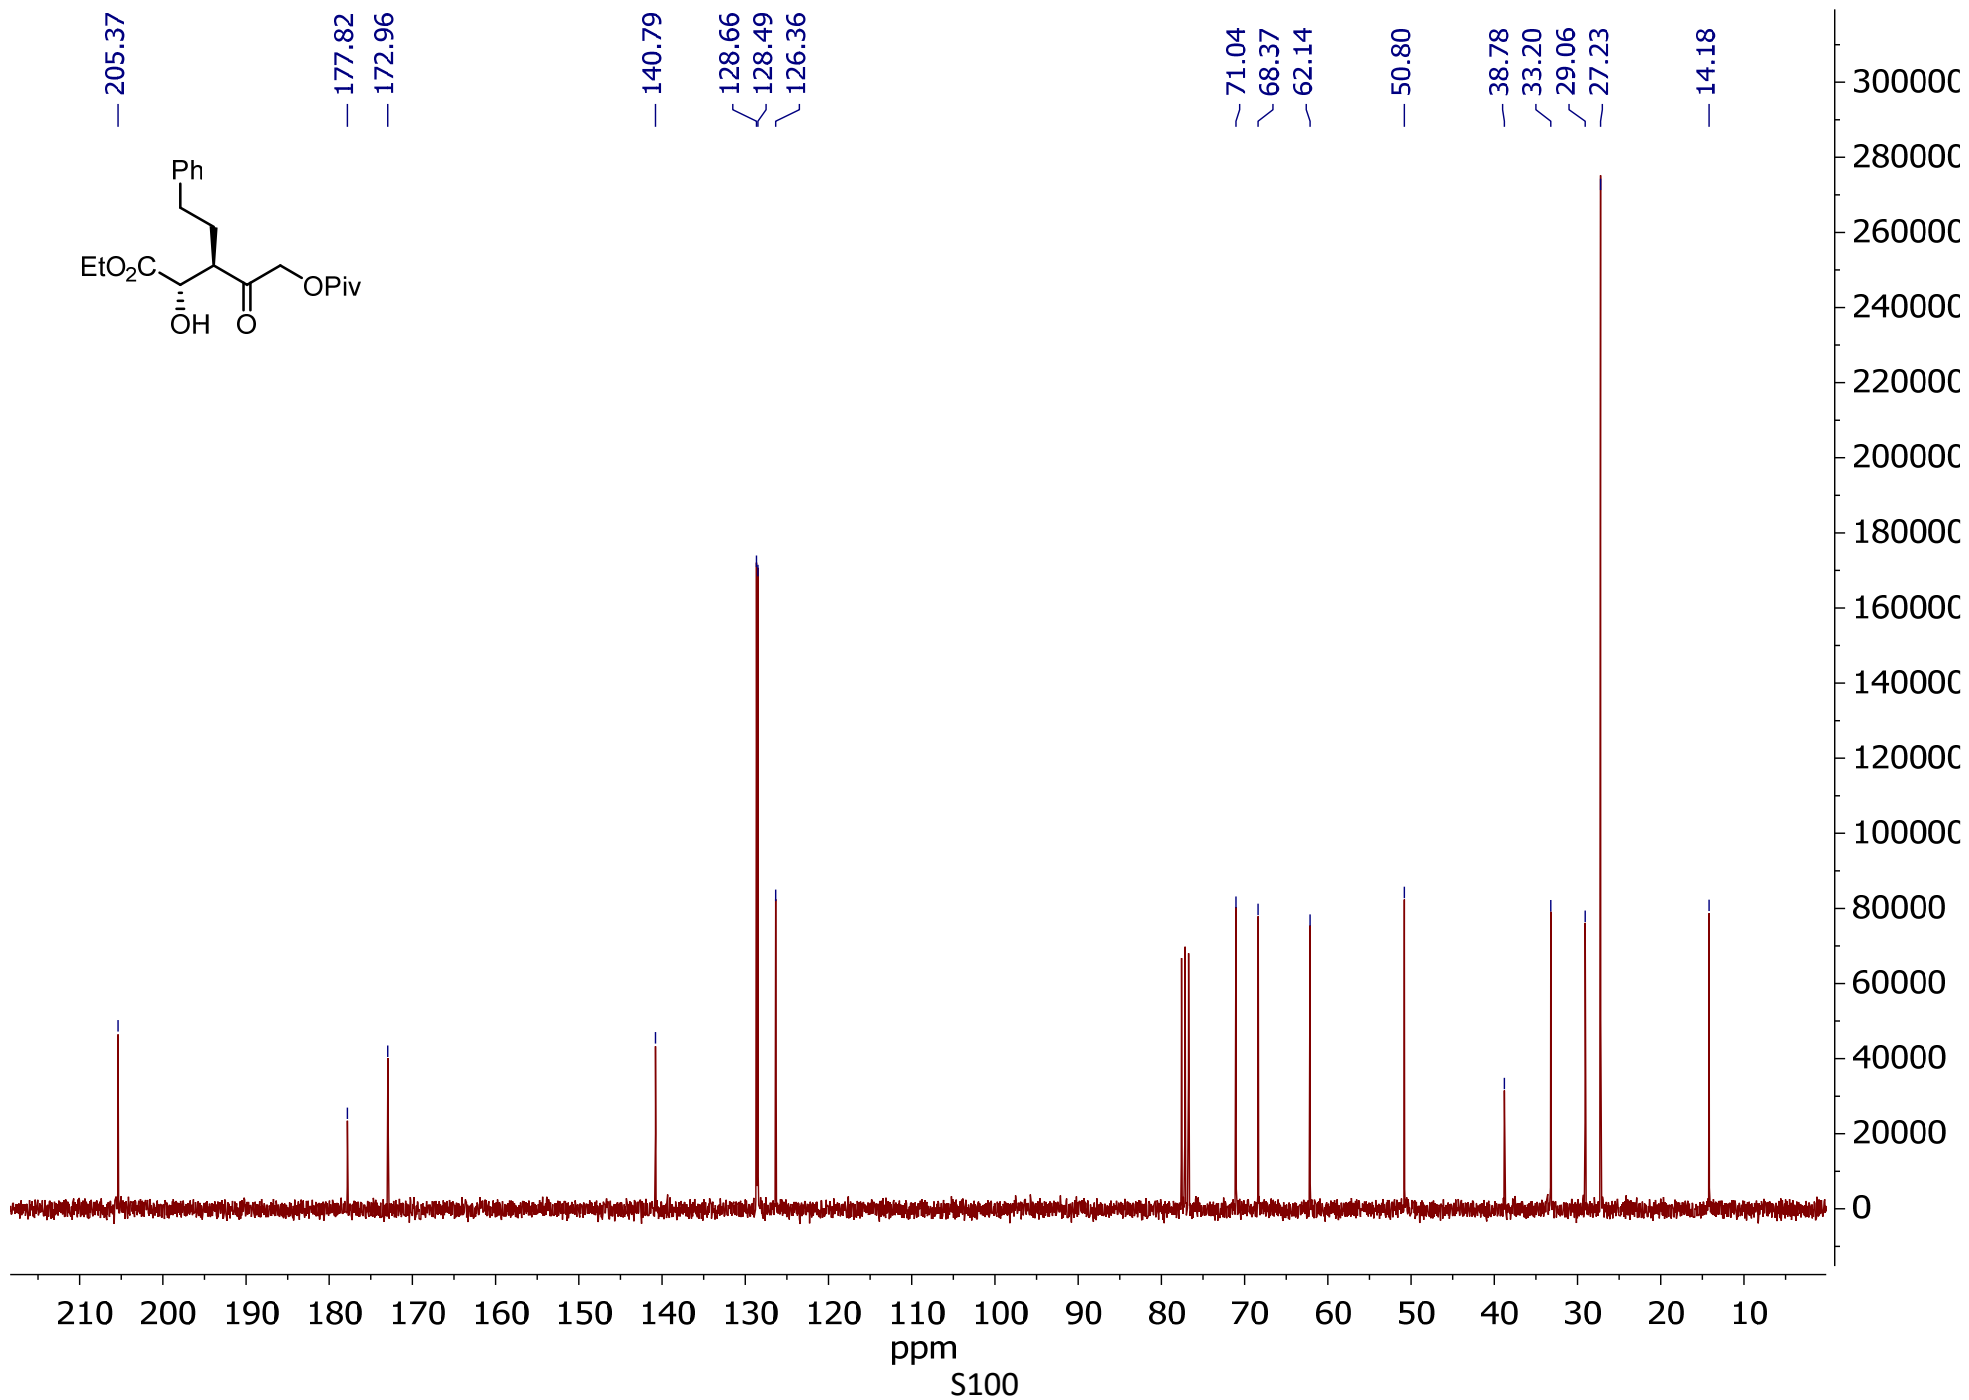

UPY841.100.{13C}depts/3  
/ILDT UPY841.100

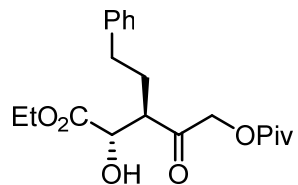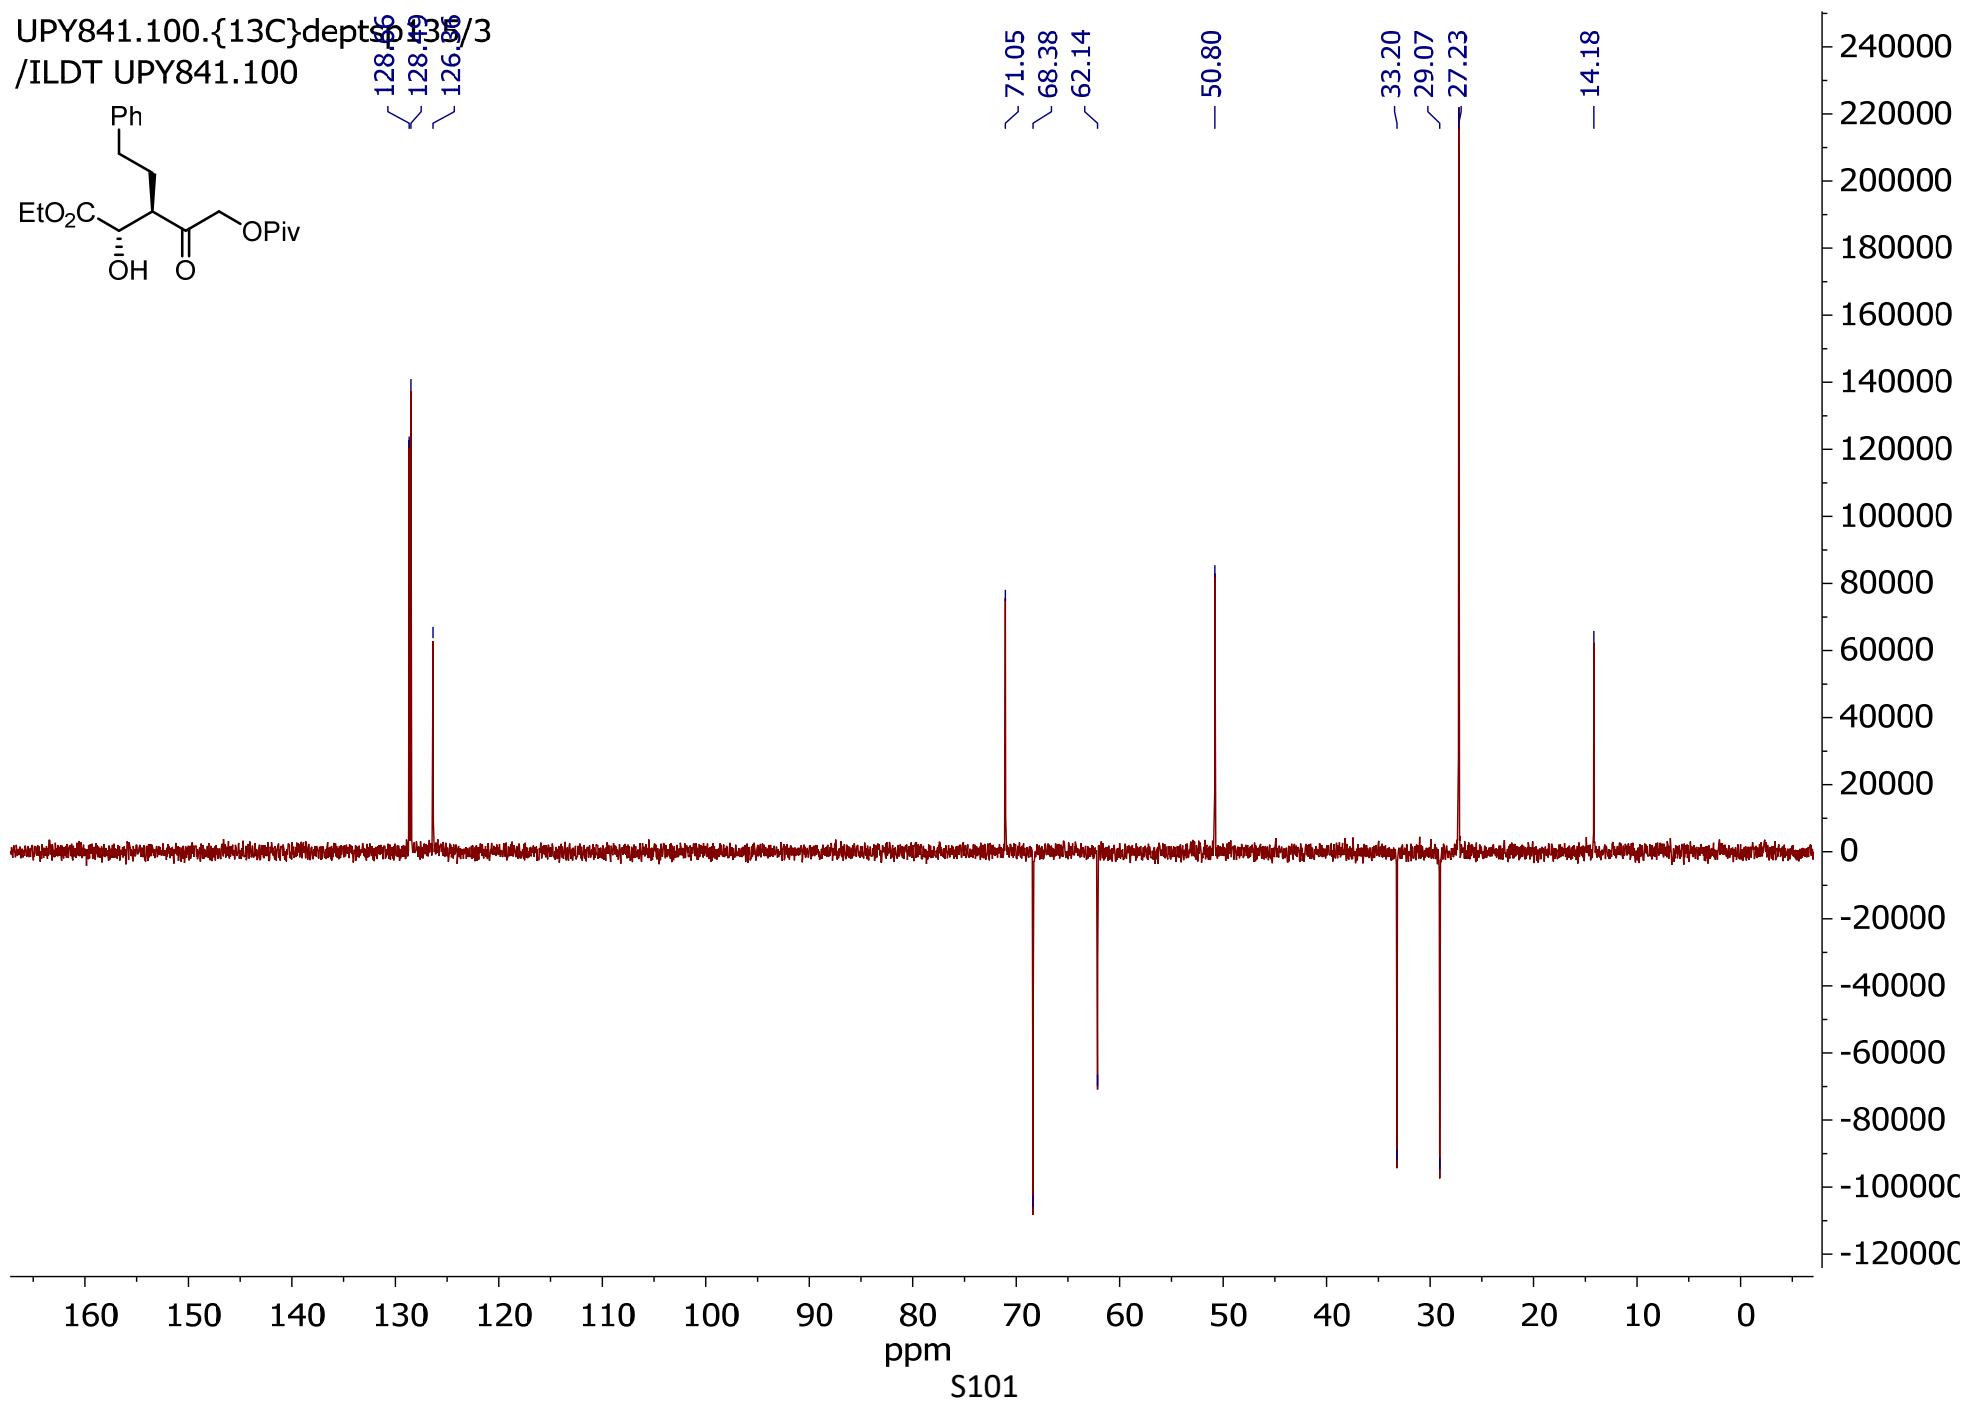

UPY841.100.{1H-13C}HSQC/4  
/ILD T UPY841.100

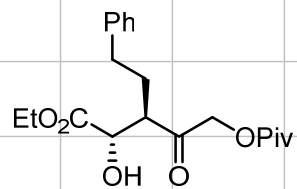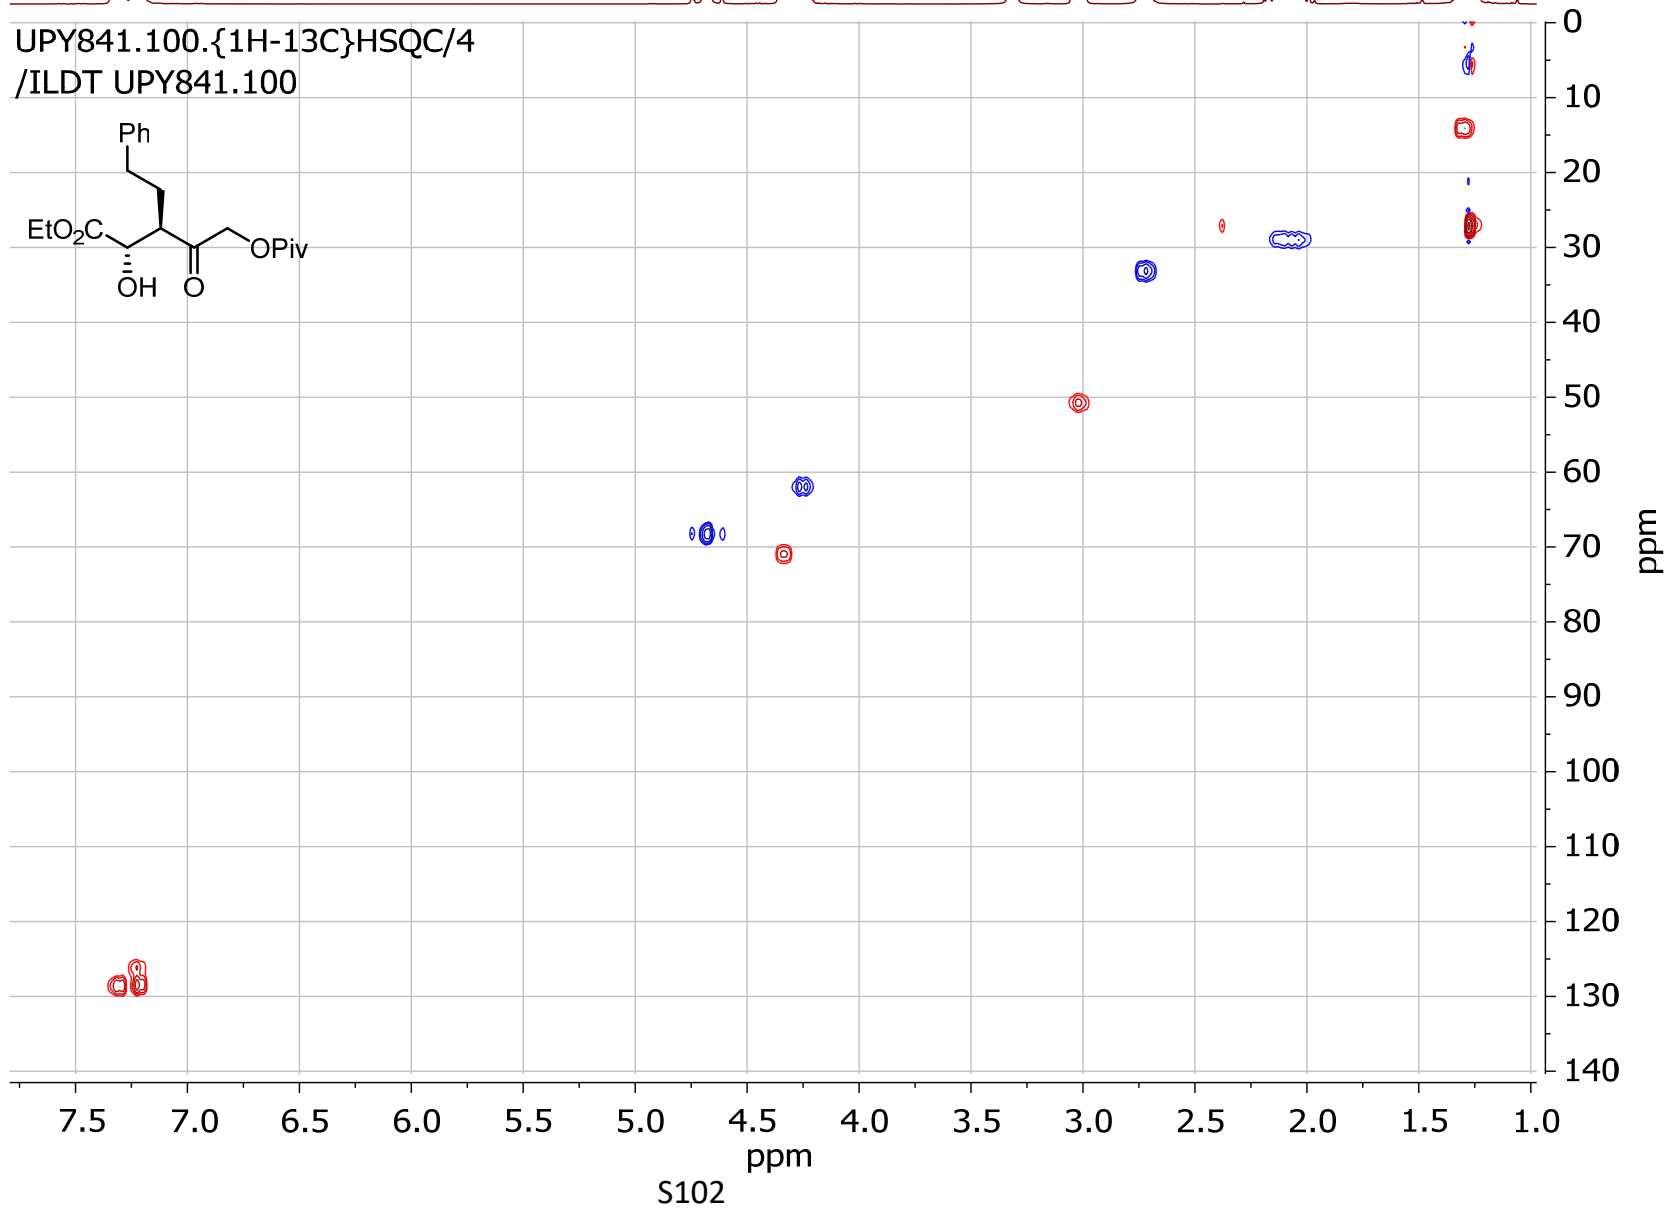

UPY819.100.{1H}/1  
/ILDT UPY819.100 Suhorukov-HD-37-21

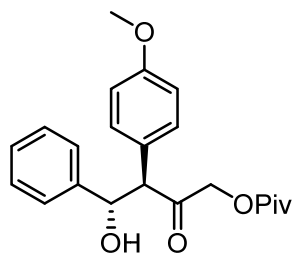

### NMR spectra of 15a

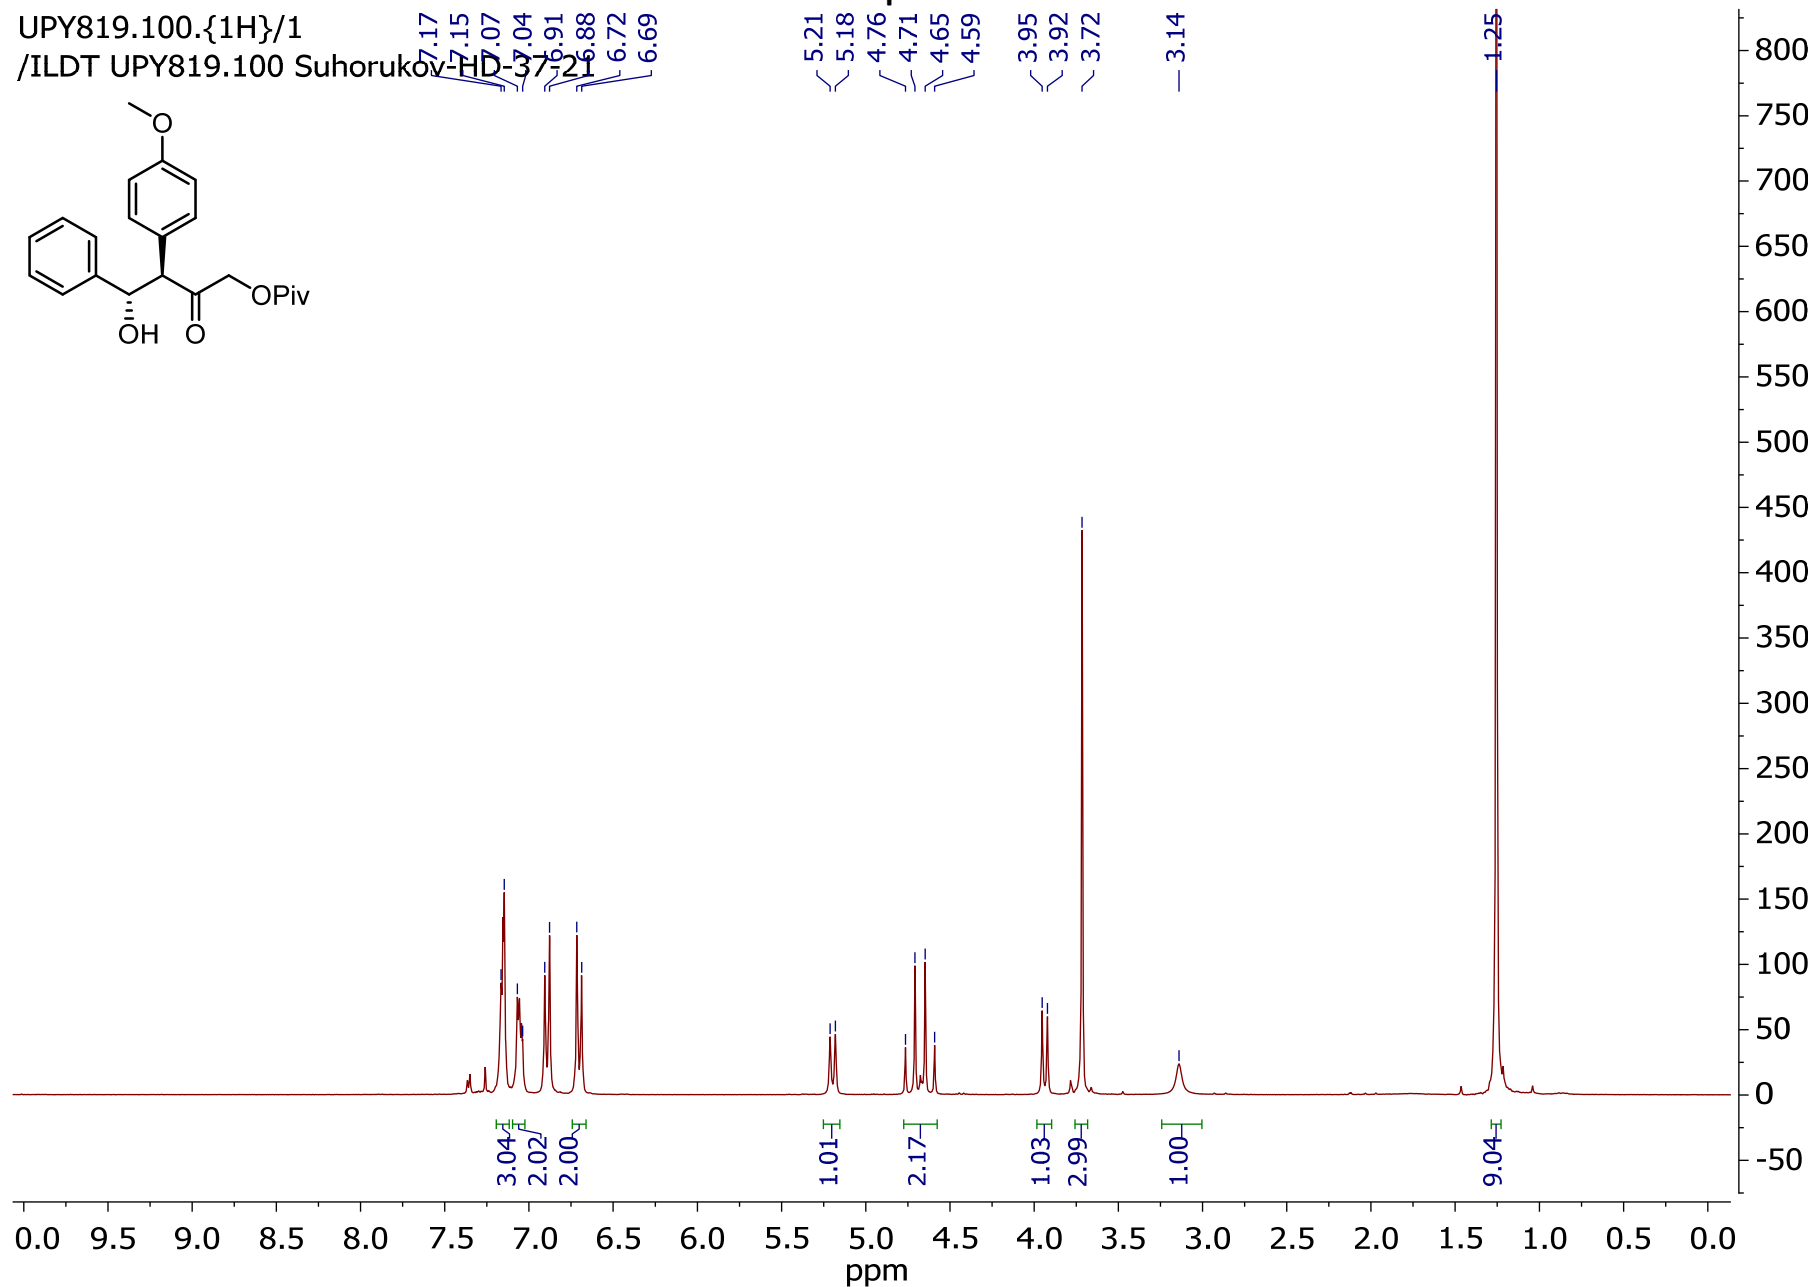

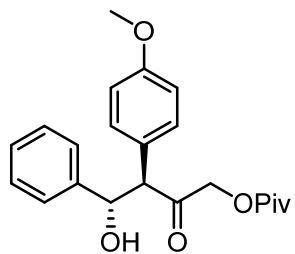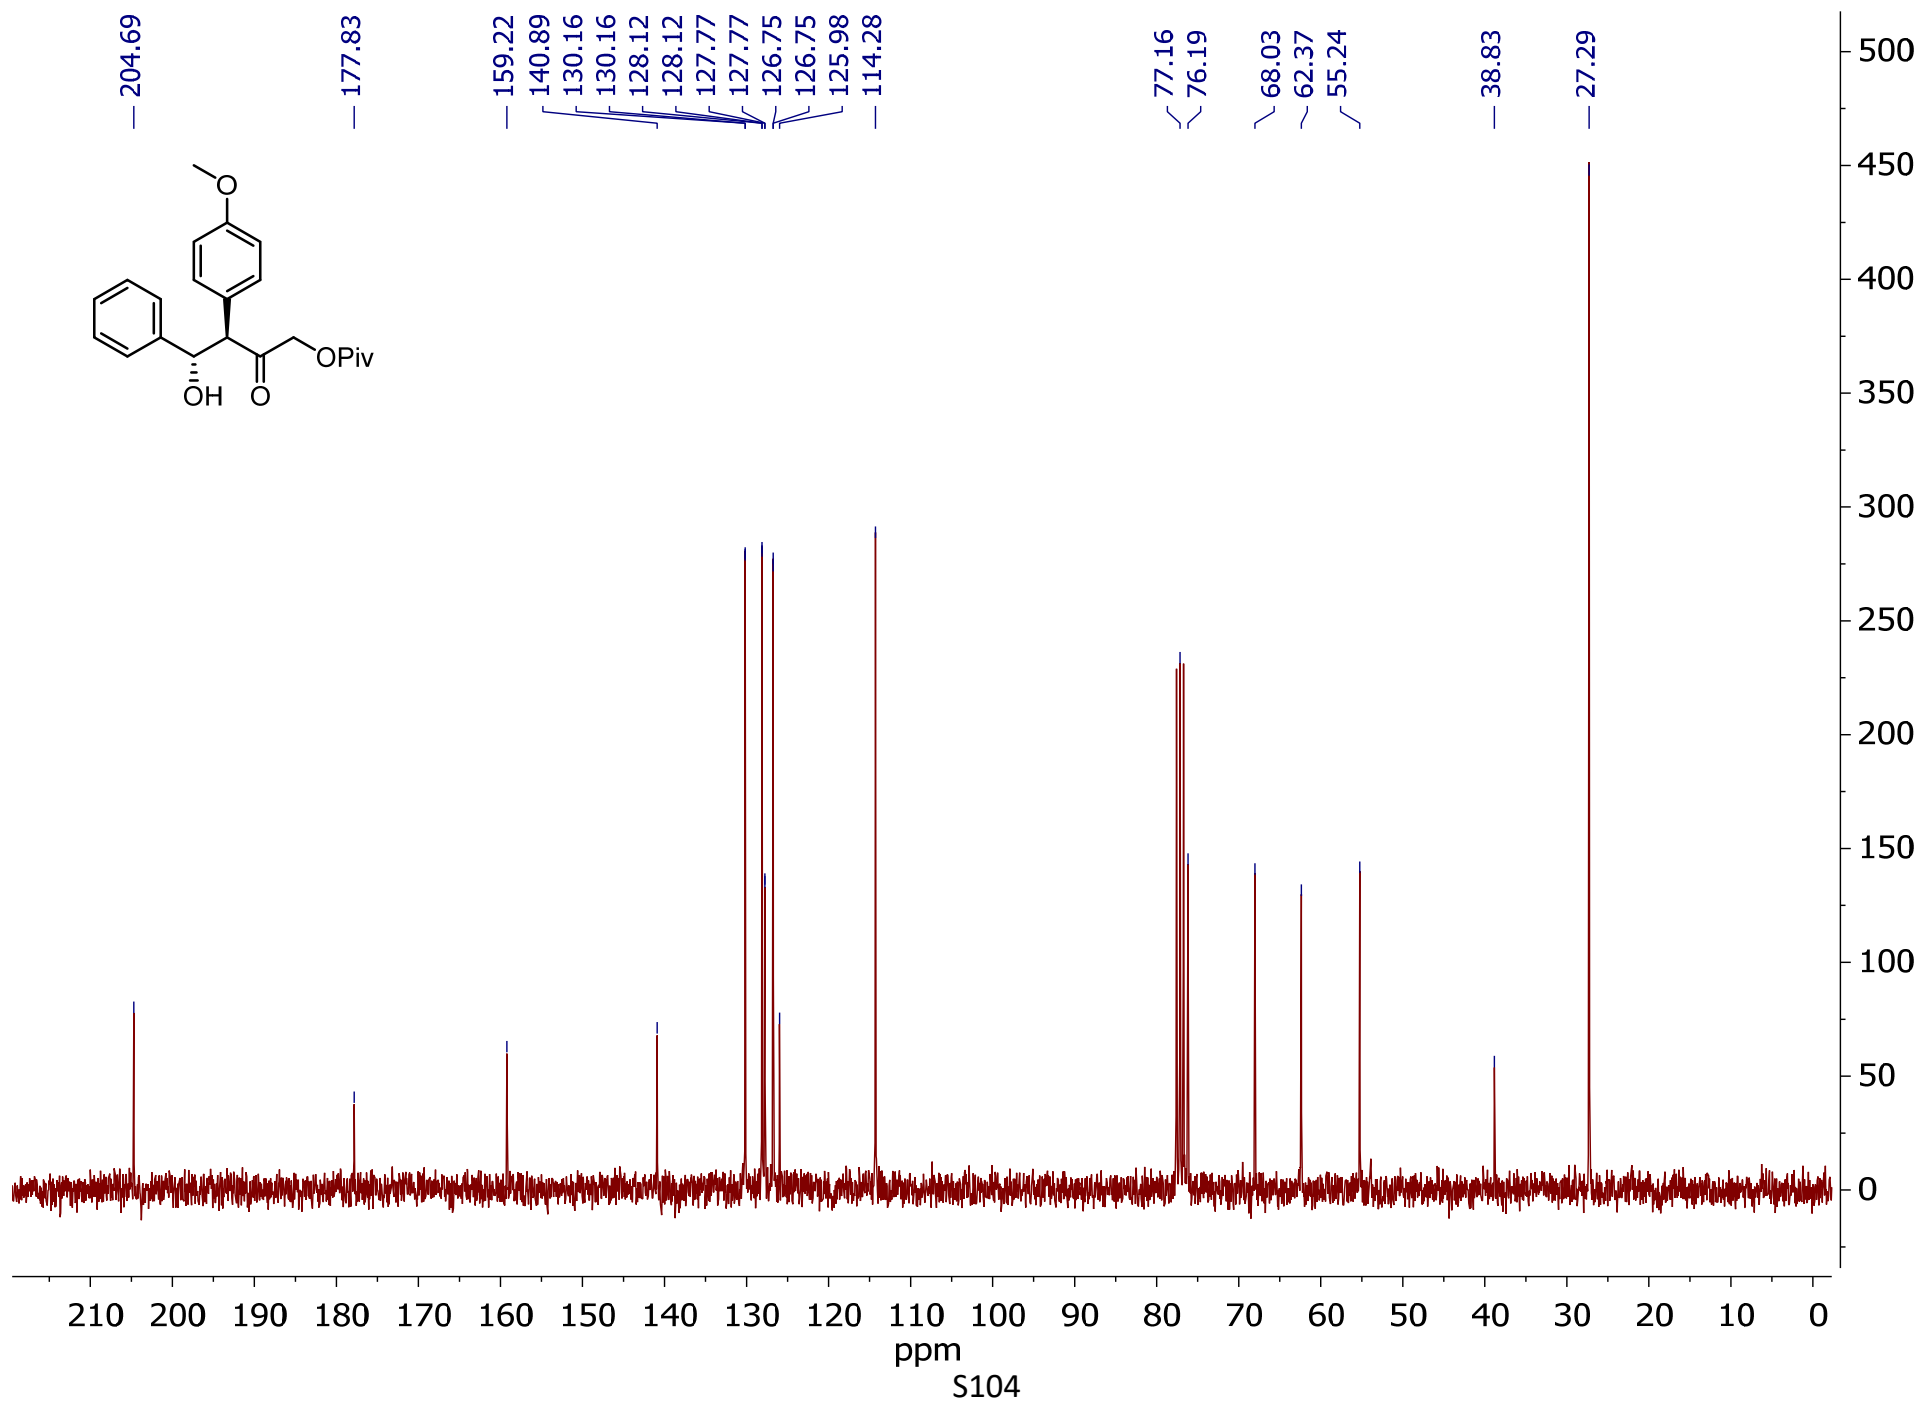



UPY819.100.{13C}deptsp135/3  
/ILDT UPY819.100 Suhorukov-HD-37-21

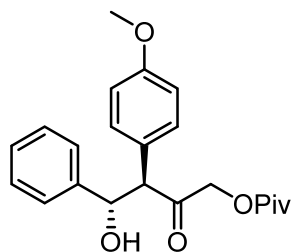

130.16  
128.12  
127.77  
126.75

76.19  
68.03  
62.37  
55.25

27.29

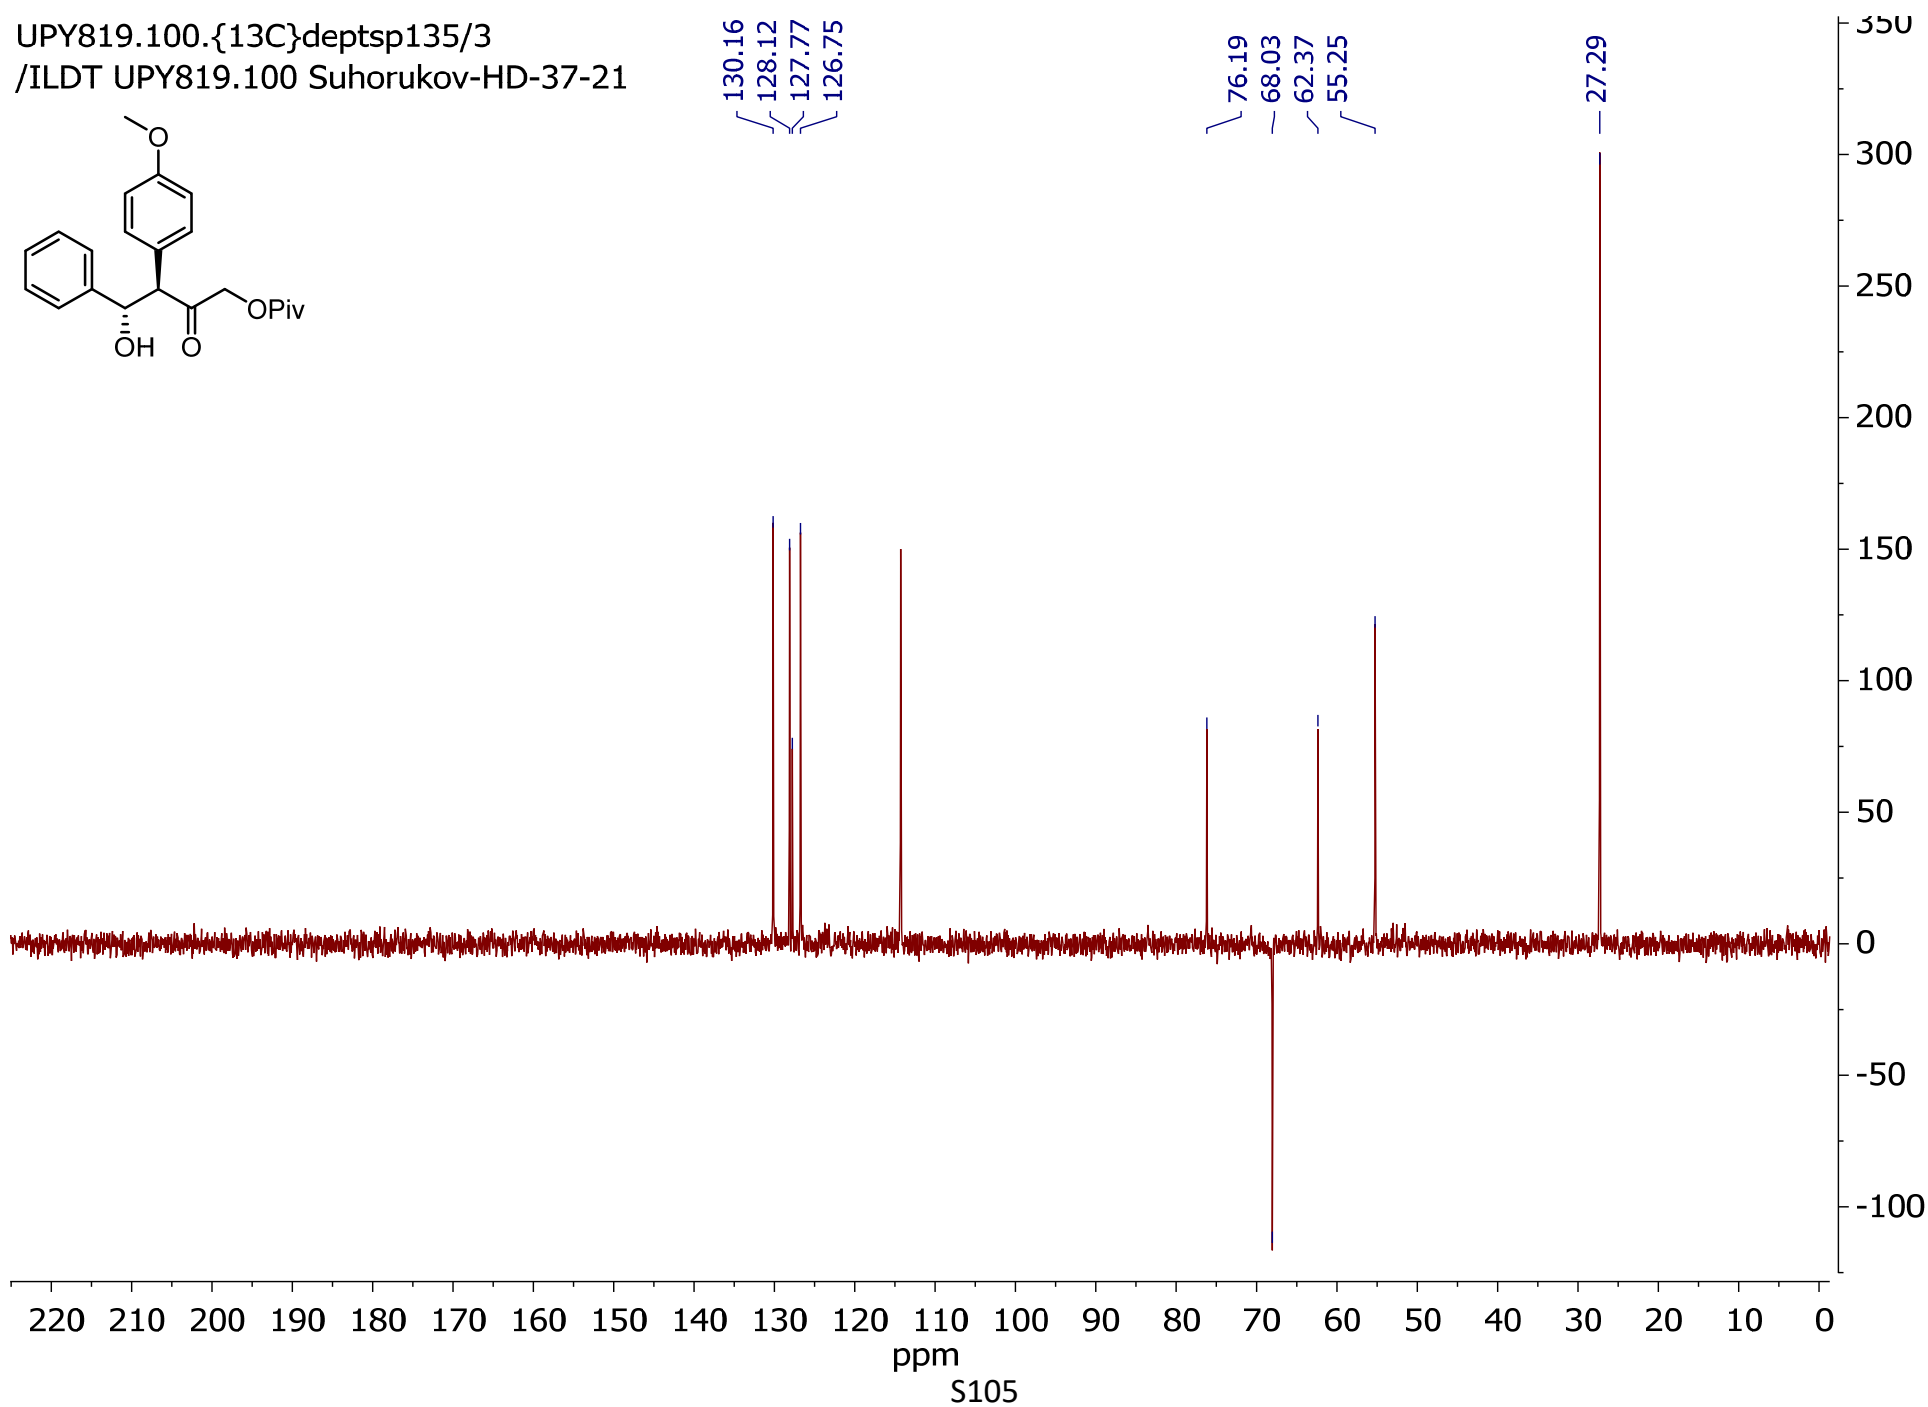

UPY822.100.{1H}/1  
/ILDT UPY822.100

### NMR spectra of 15b

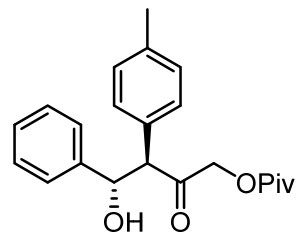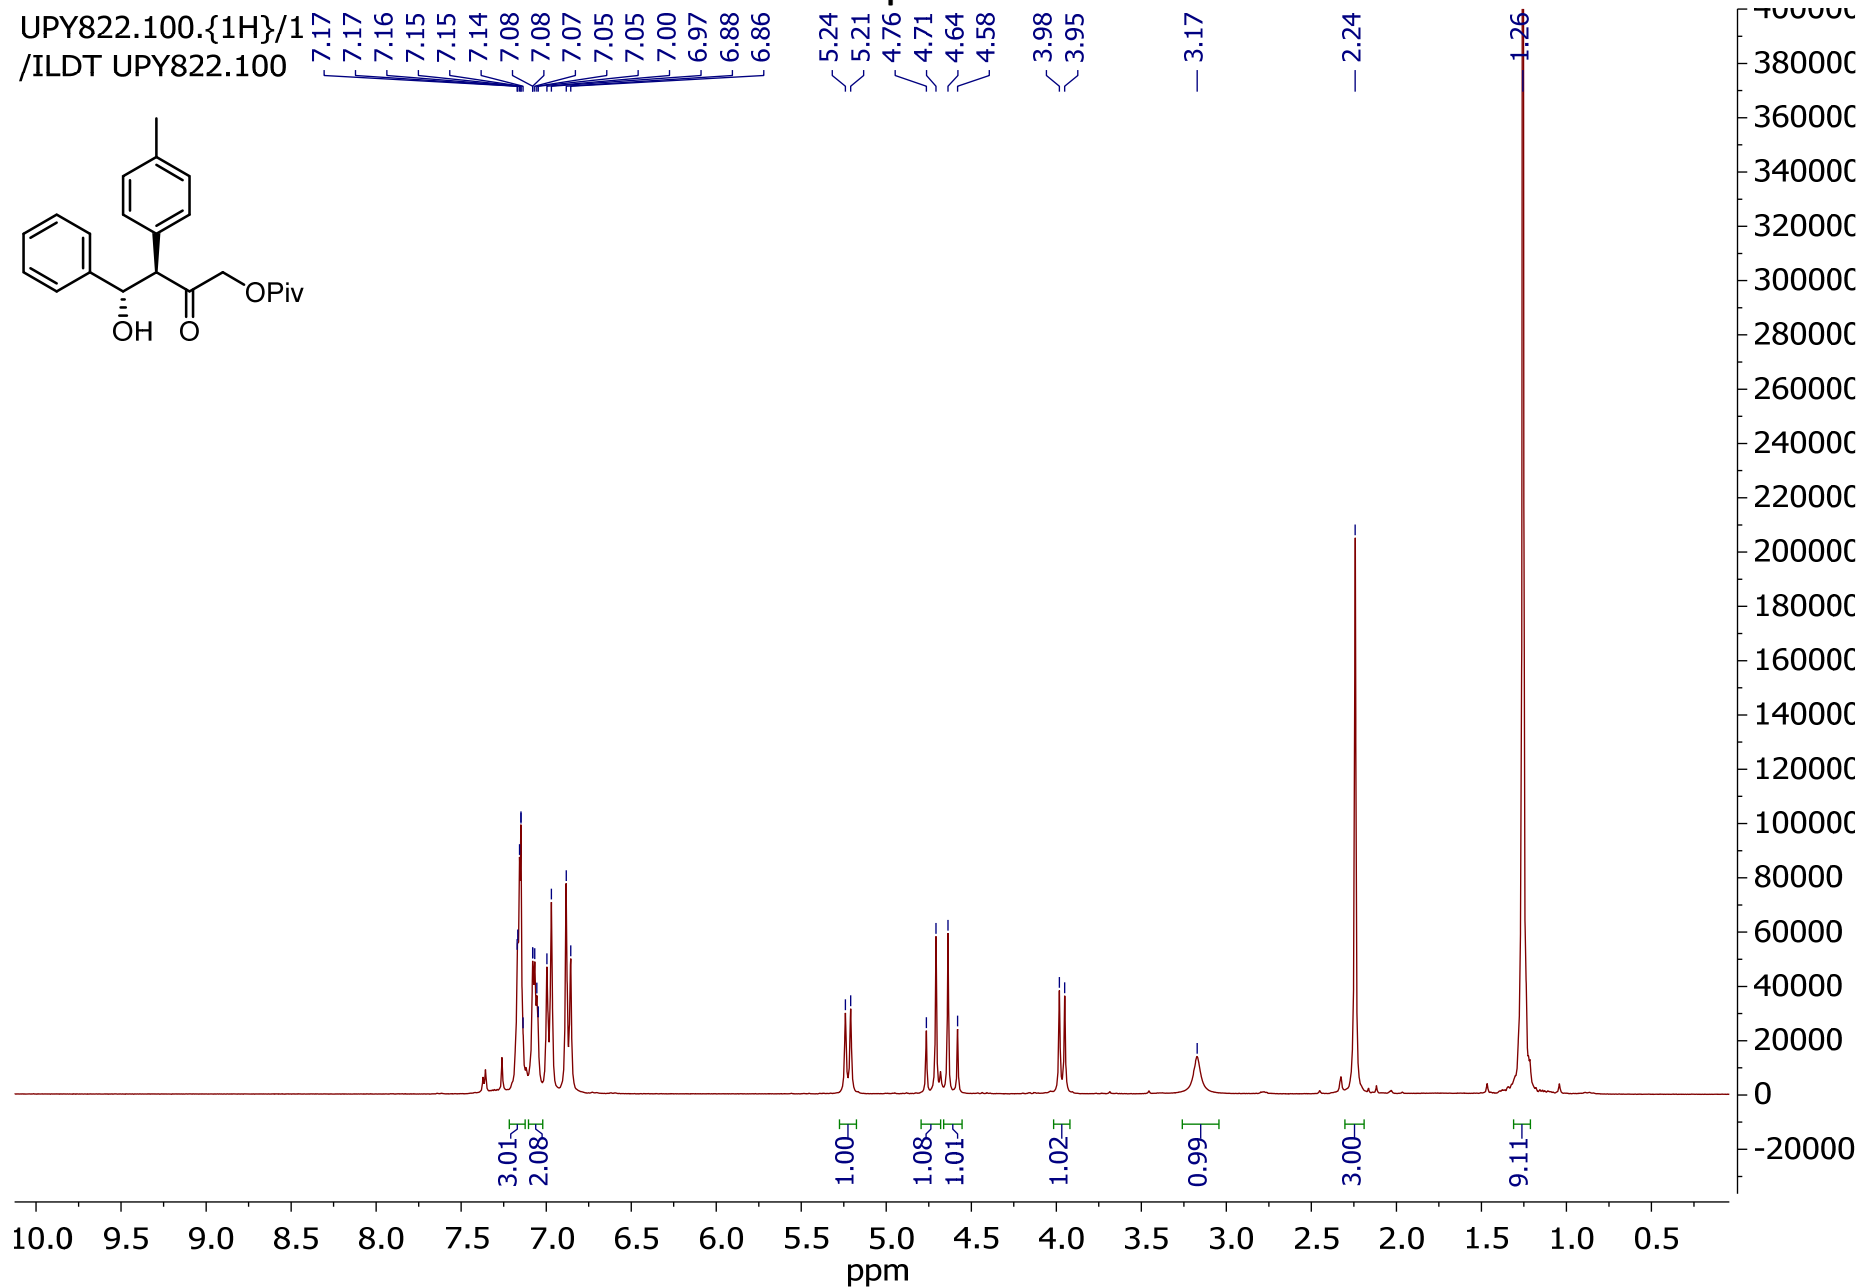

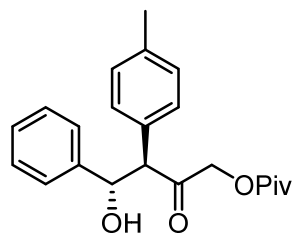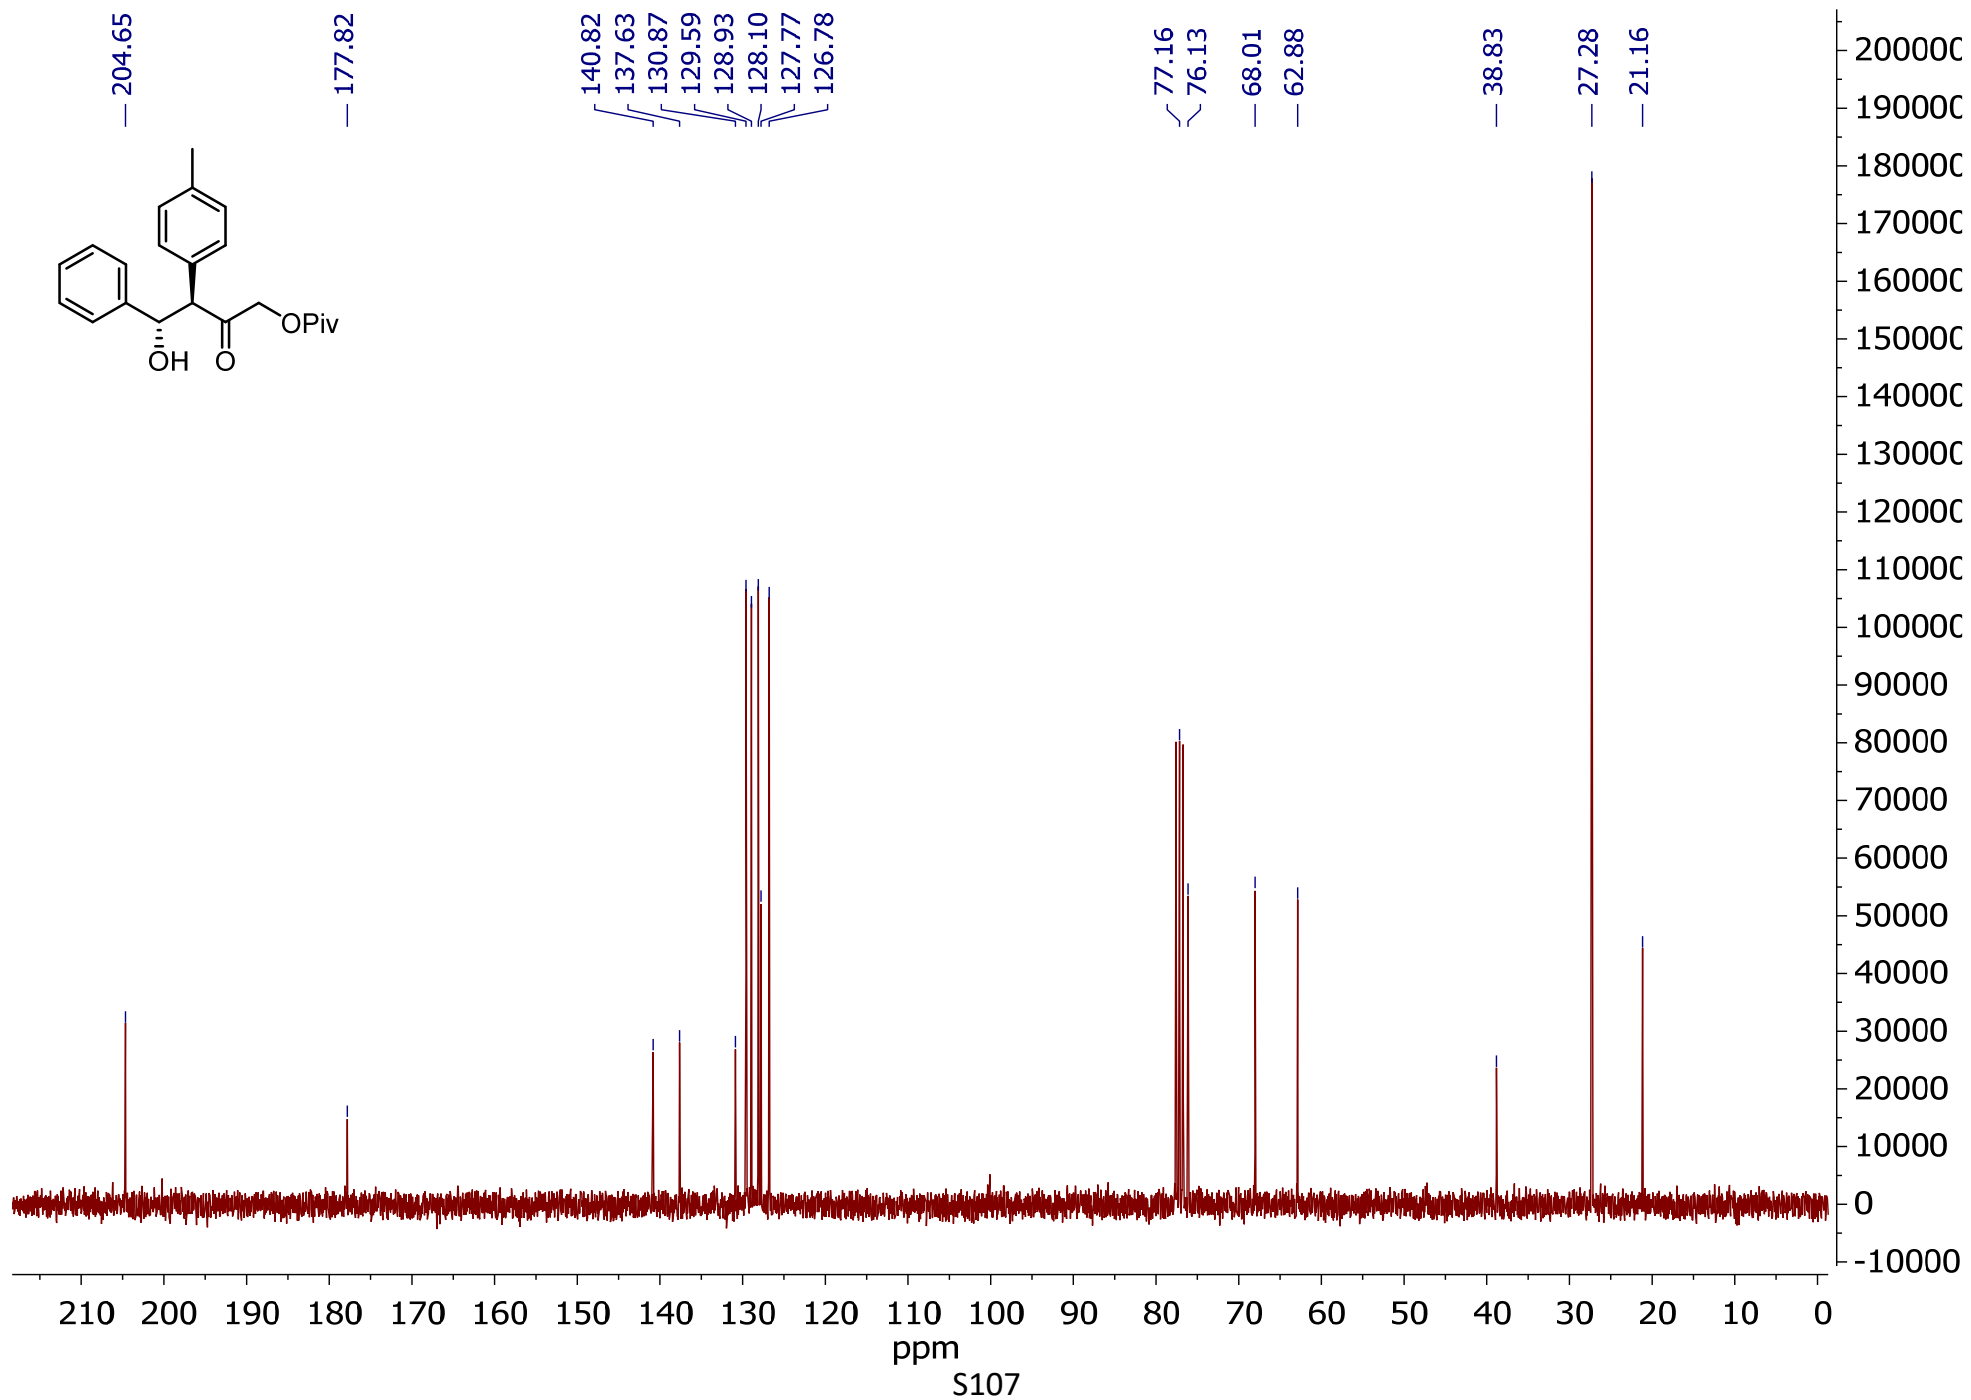

UPY822.100.{13C}deptsp135/3  
/ILDIT UPY822.100

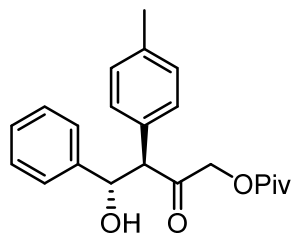

129.59  
128.93  
128.10  
127.77  
126.78

76.13

68.01

62.88

27.28

21.16

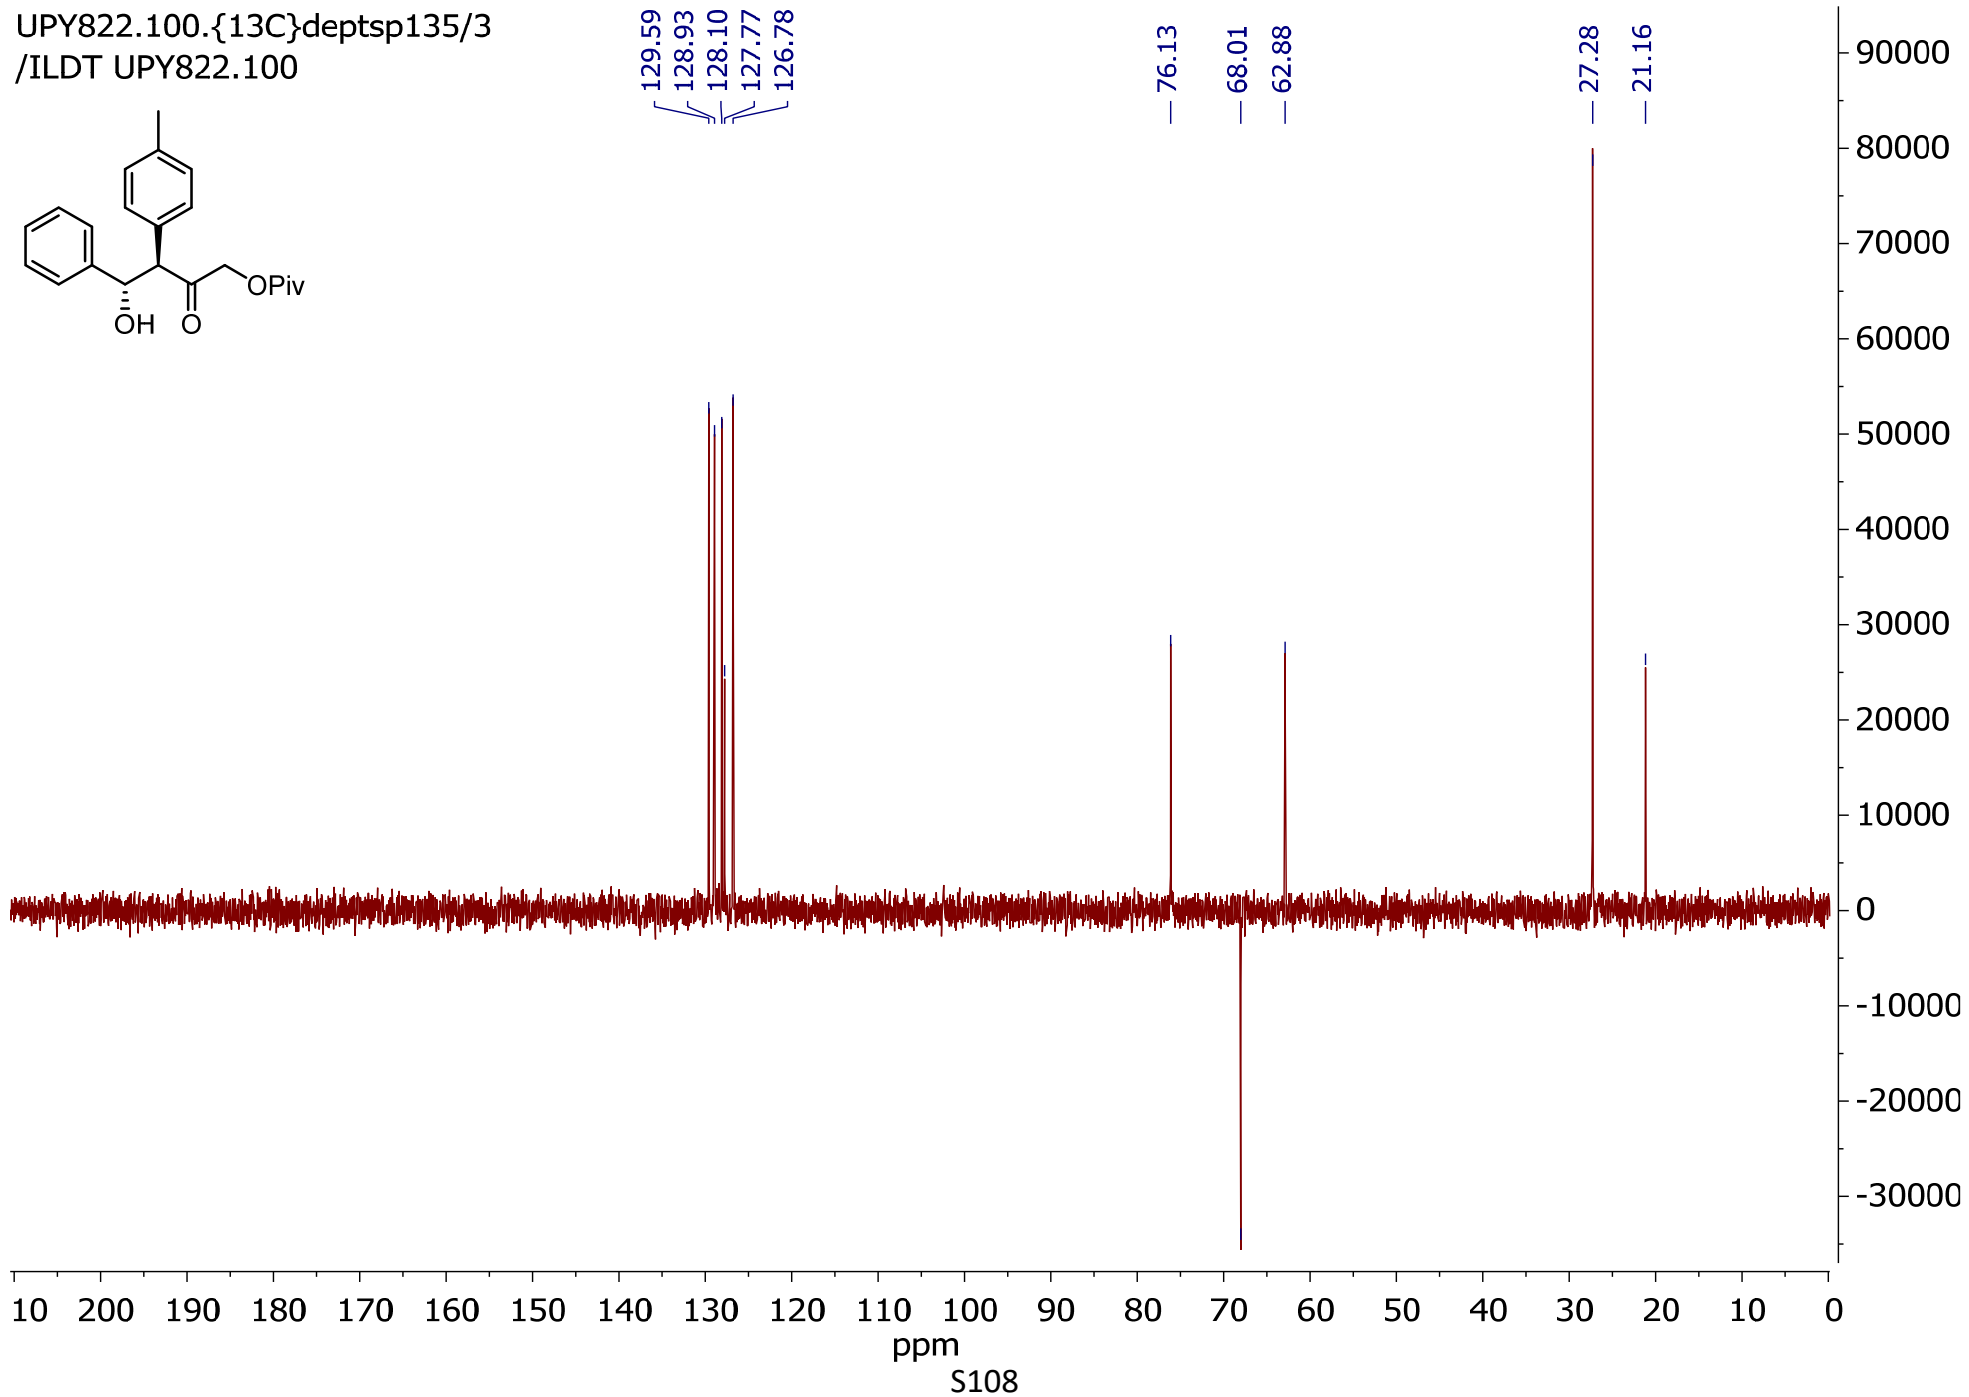

UPY825.200.{1H}/1  
/ILDT UPY825.200 Suhorukov-HD-37-21

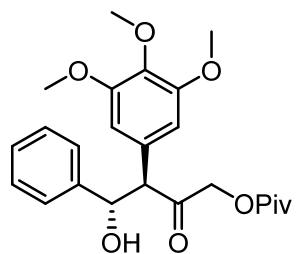

### NMR spectra of 15c

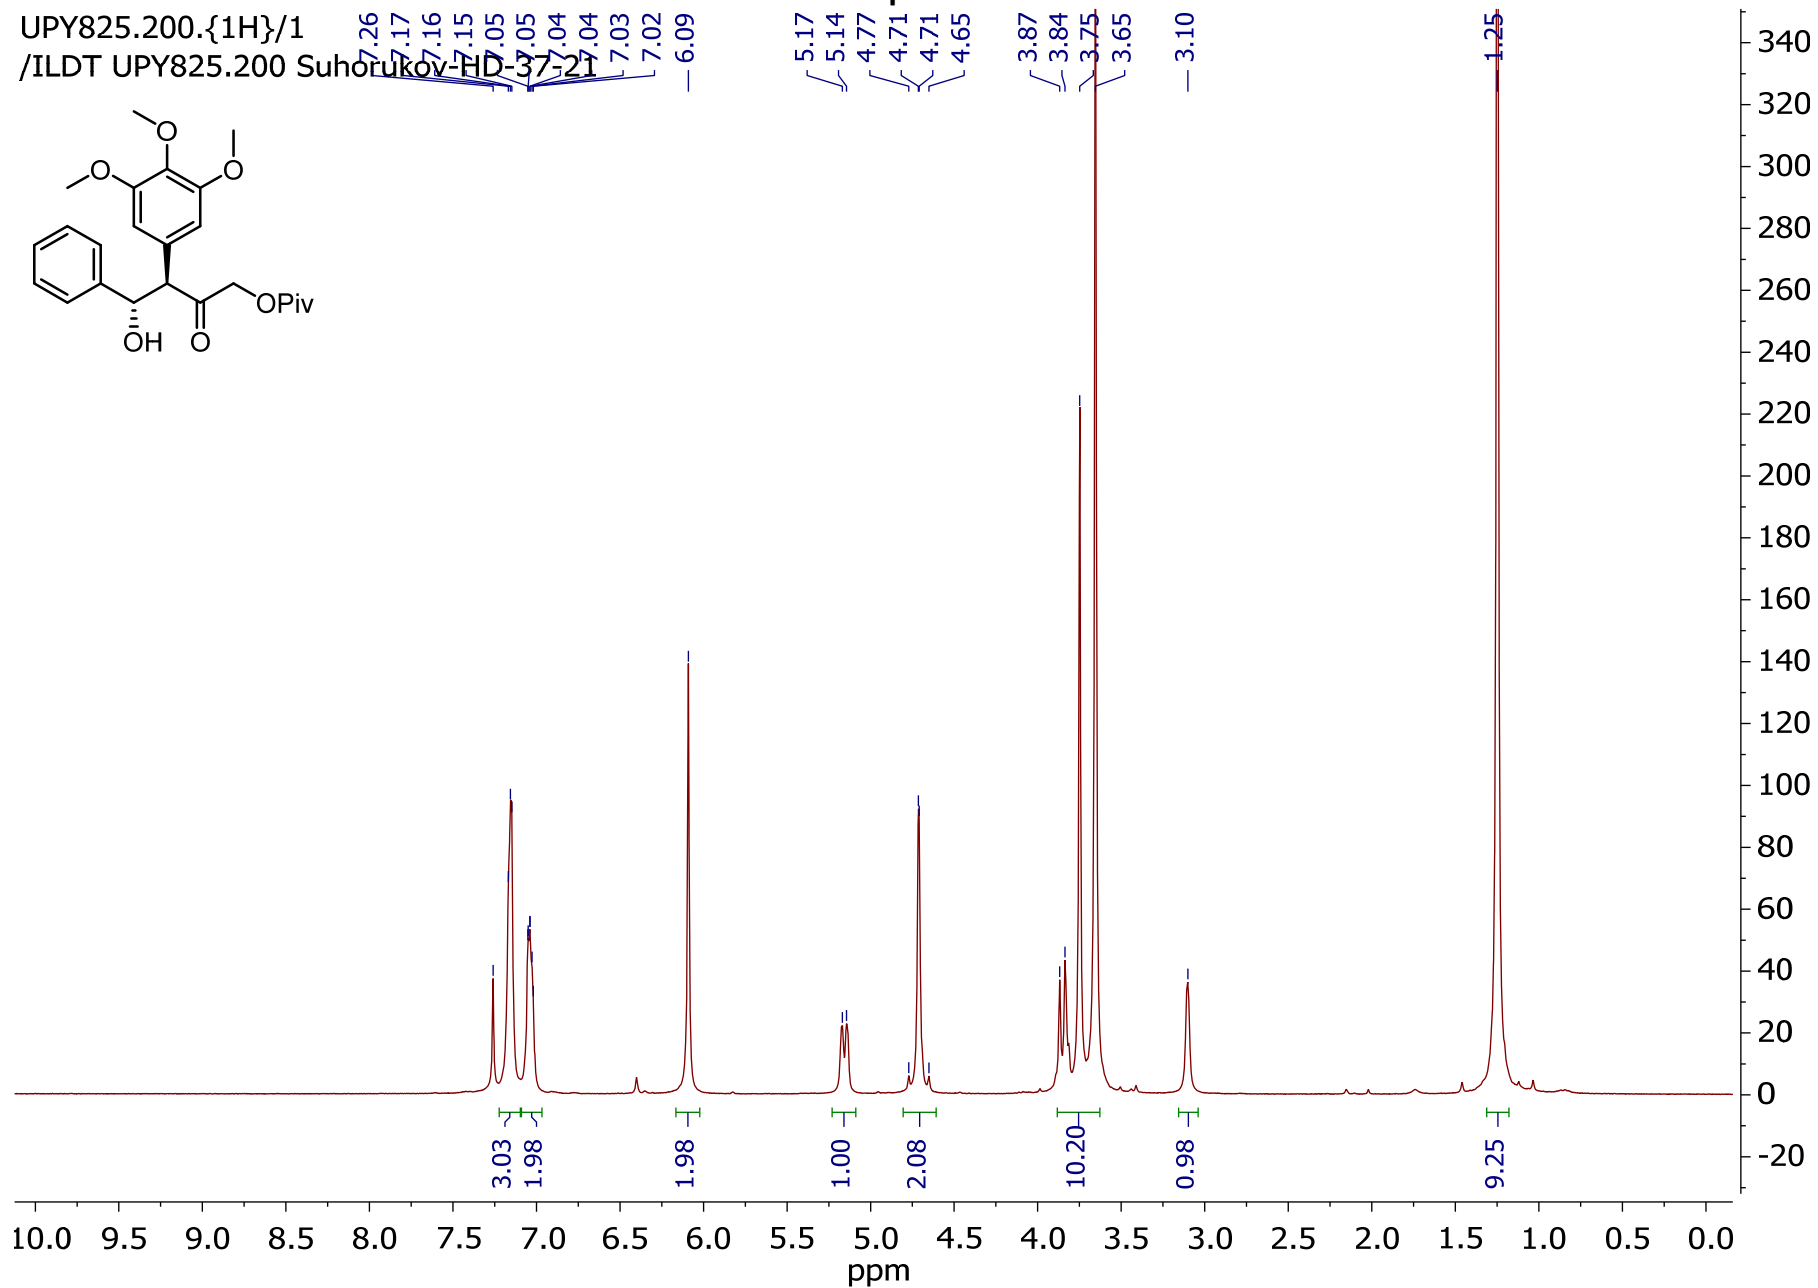

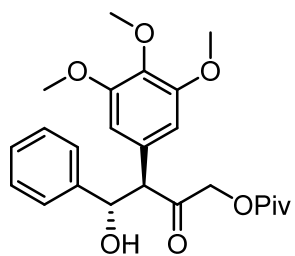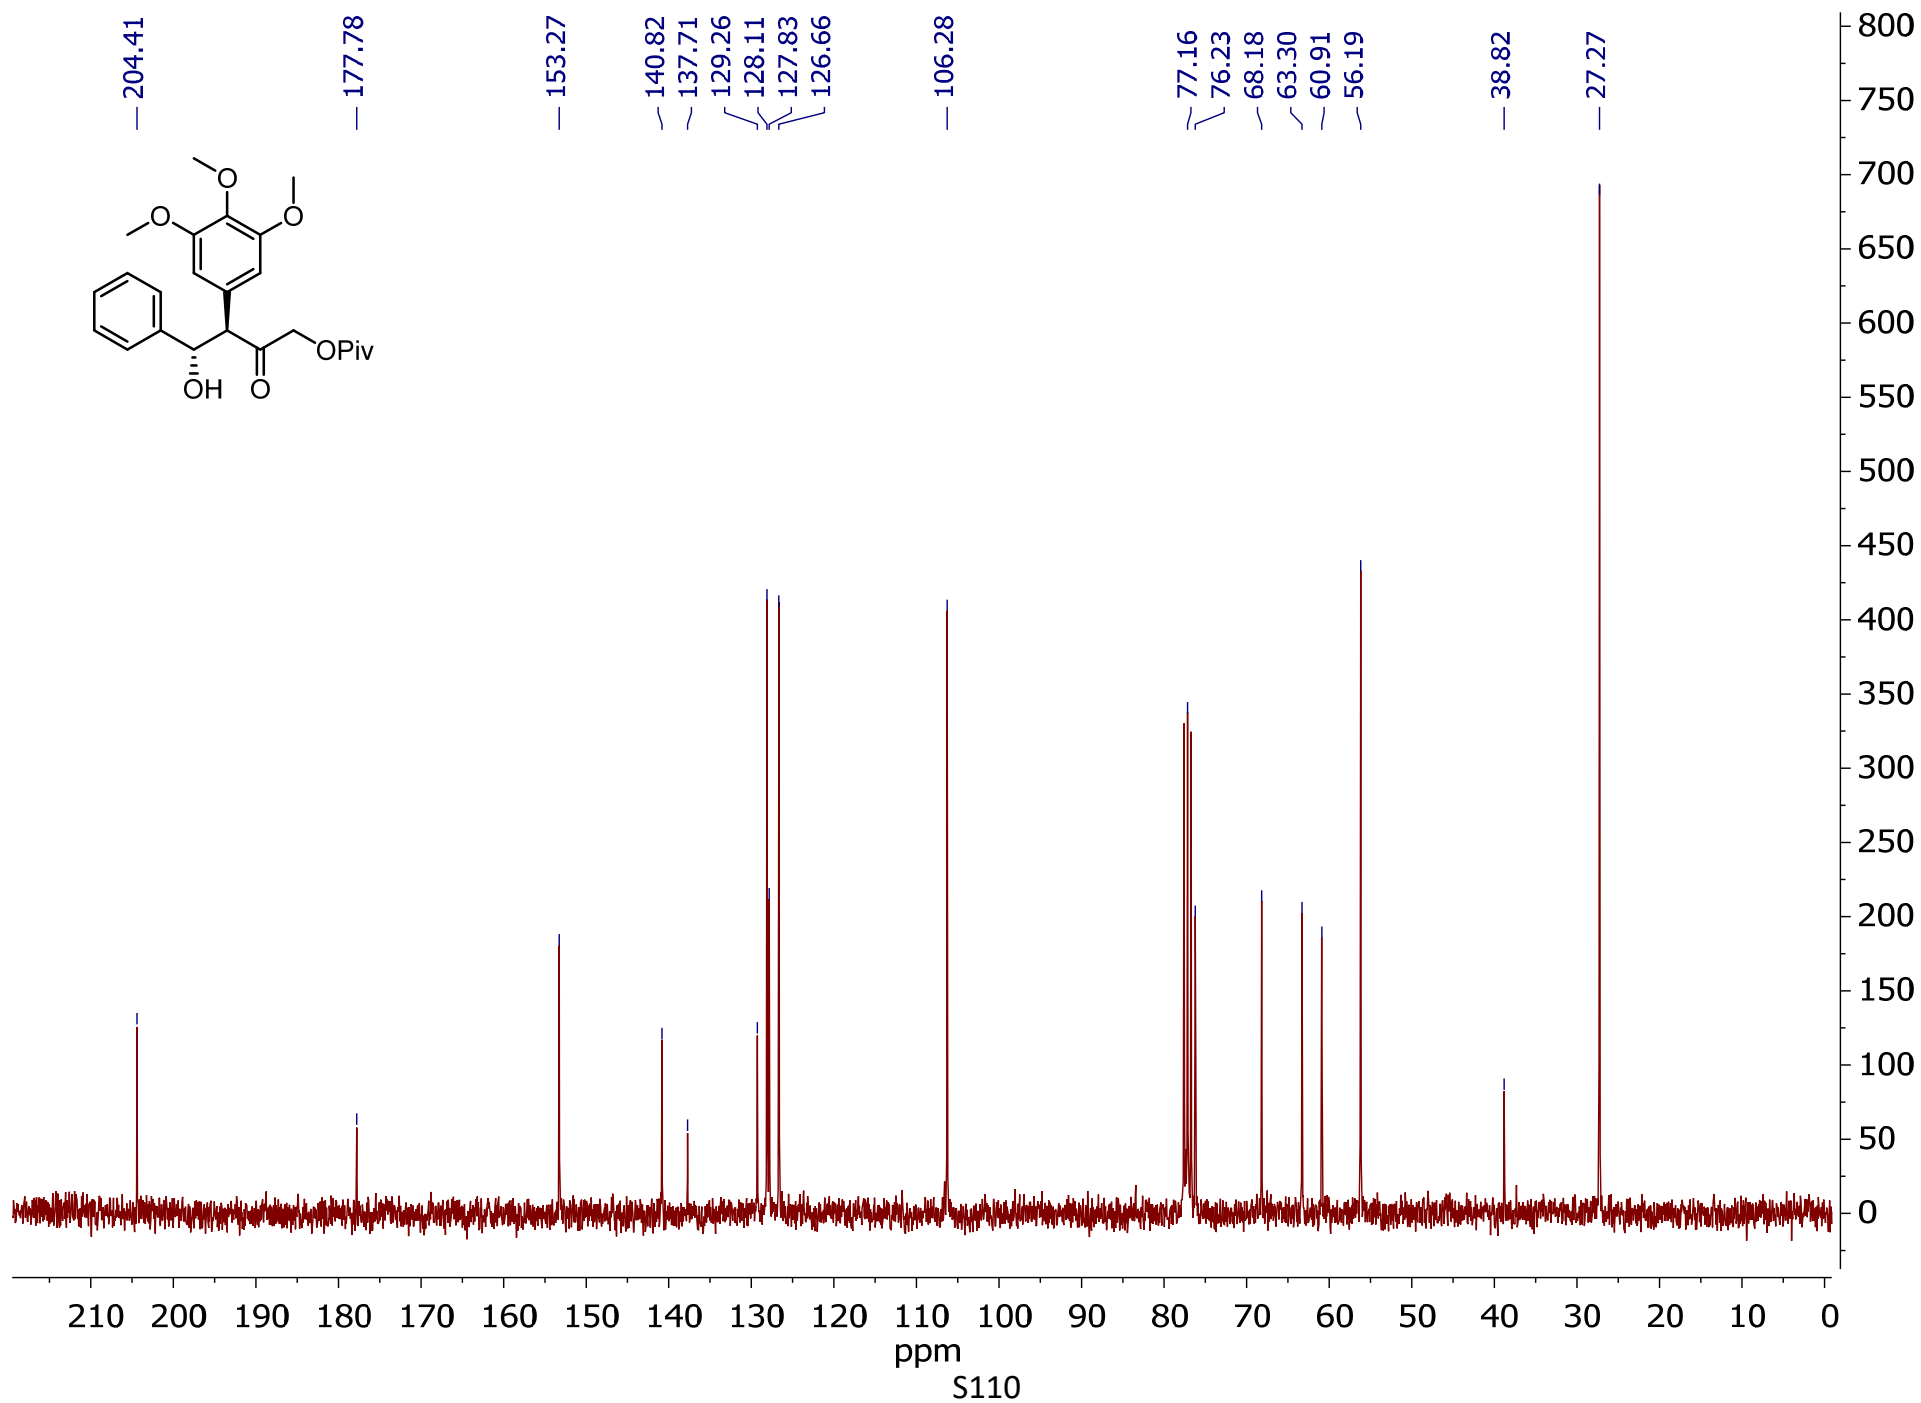

UPY825.200.{13C}deptsp135/3  
/ILDY UPY825.200 Suhorukov-HD-37-21

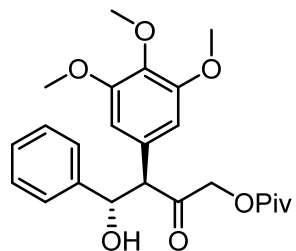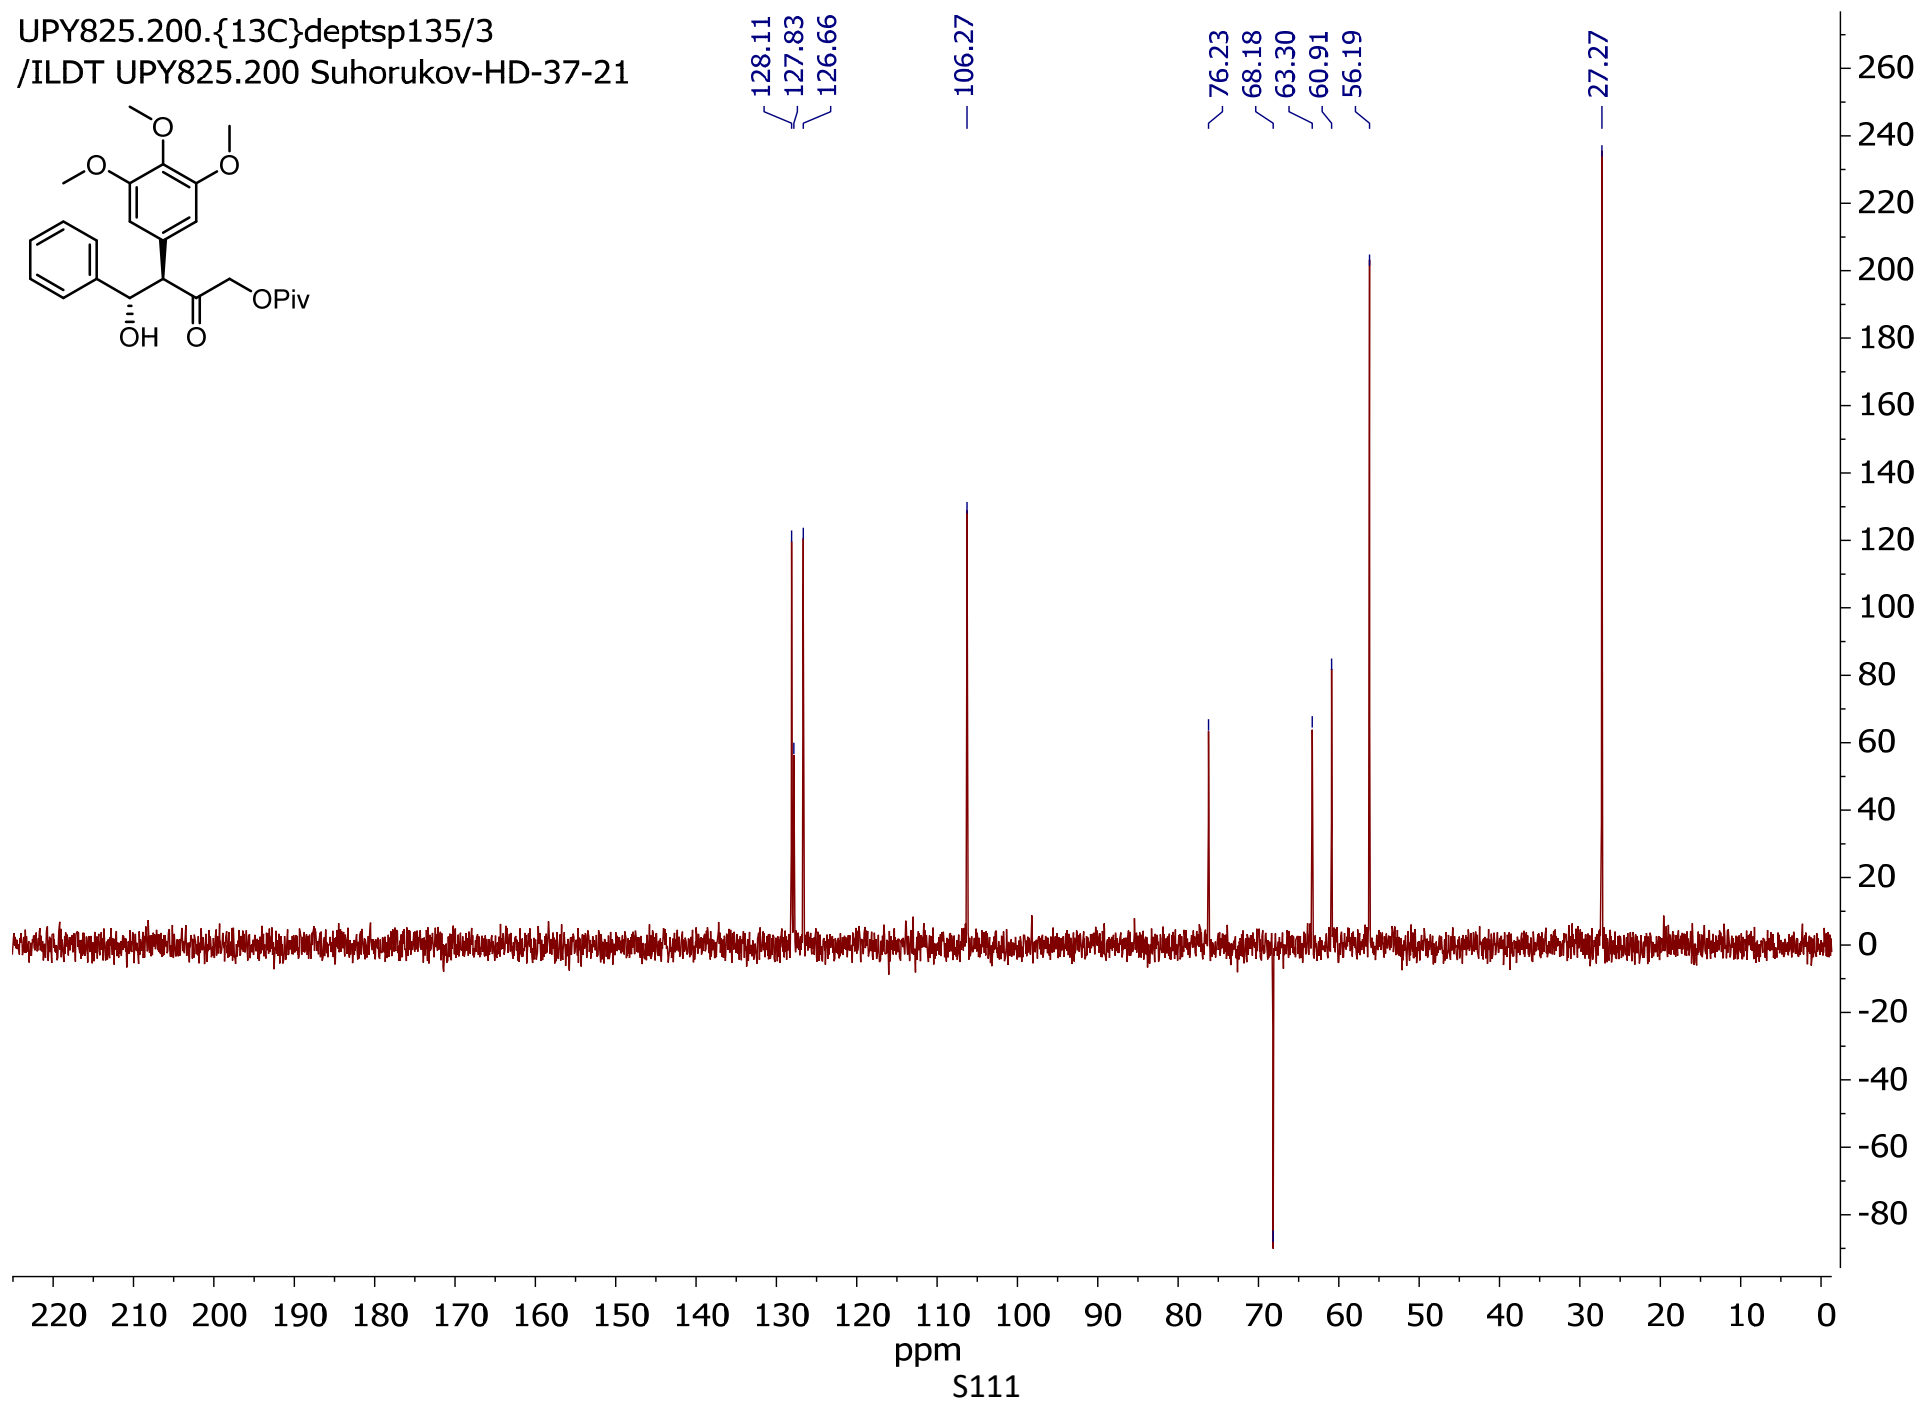

# NMR spectra of 15d

UPY823.100.11371  
/ILD.T/UPY823.100.

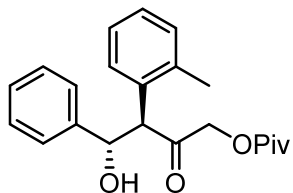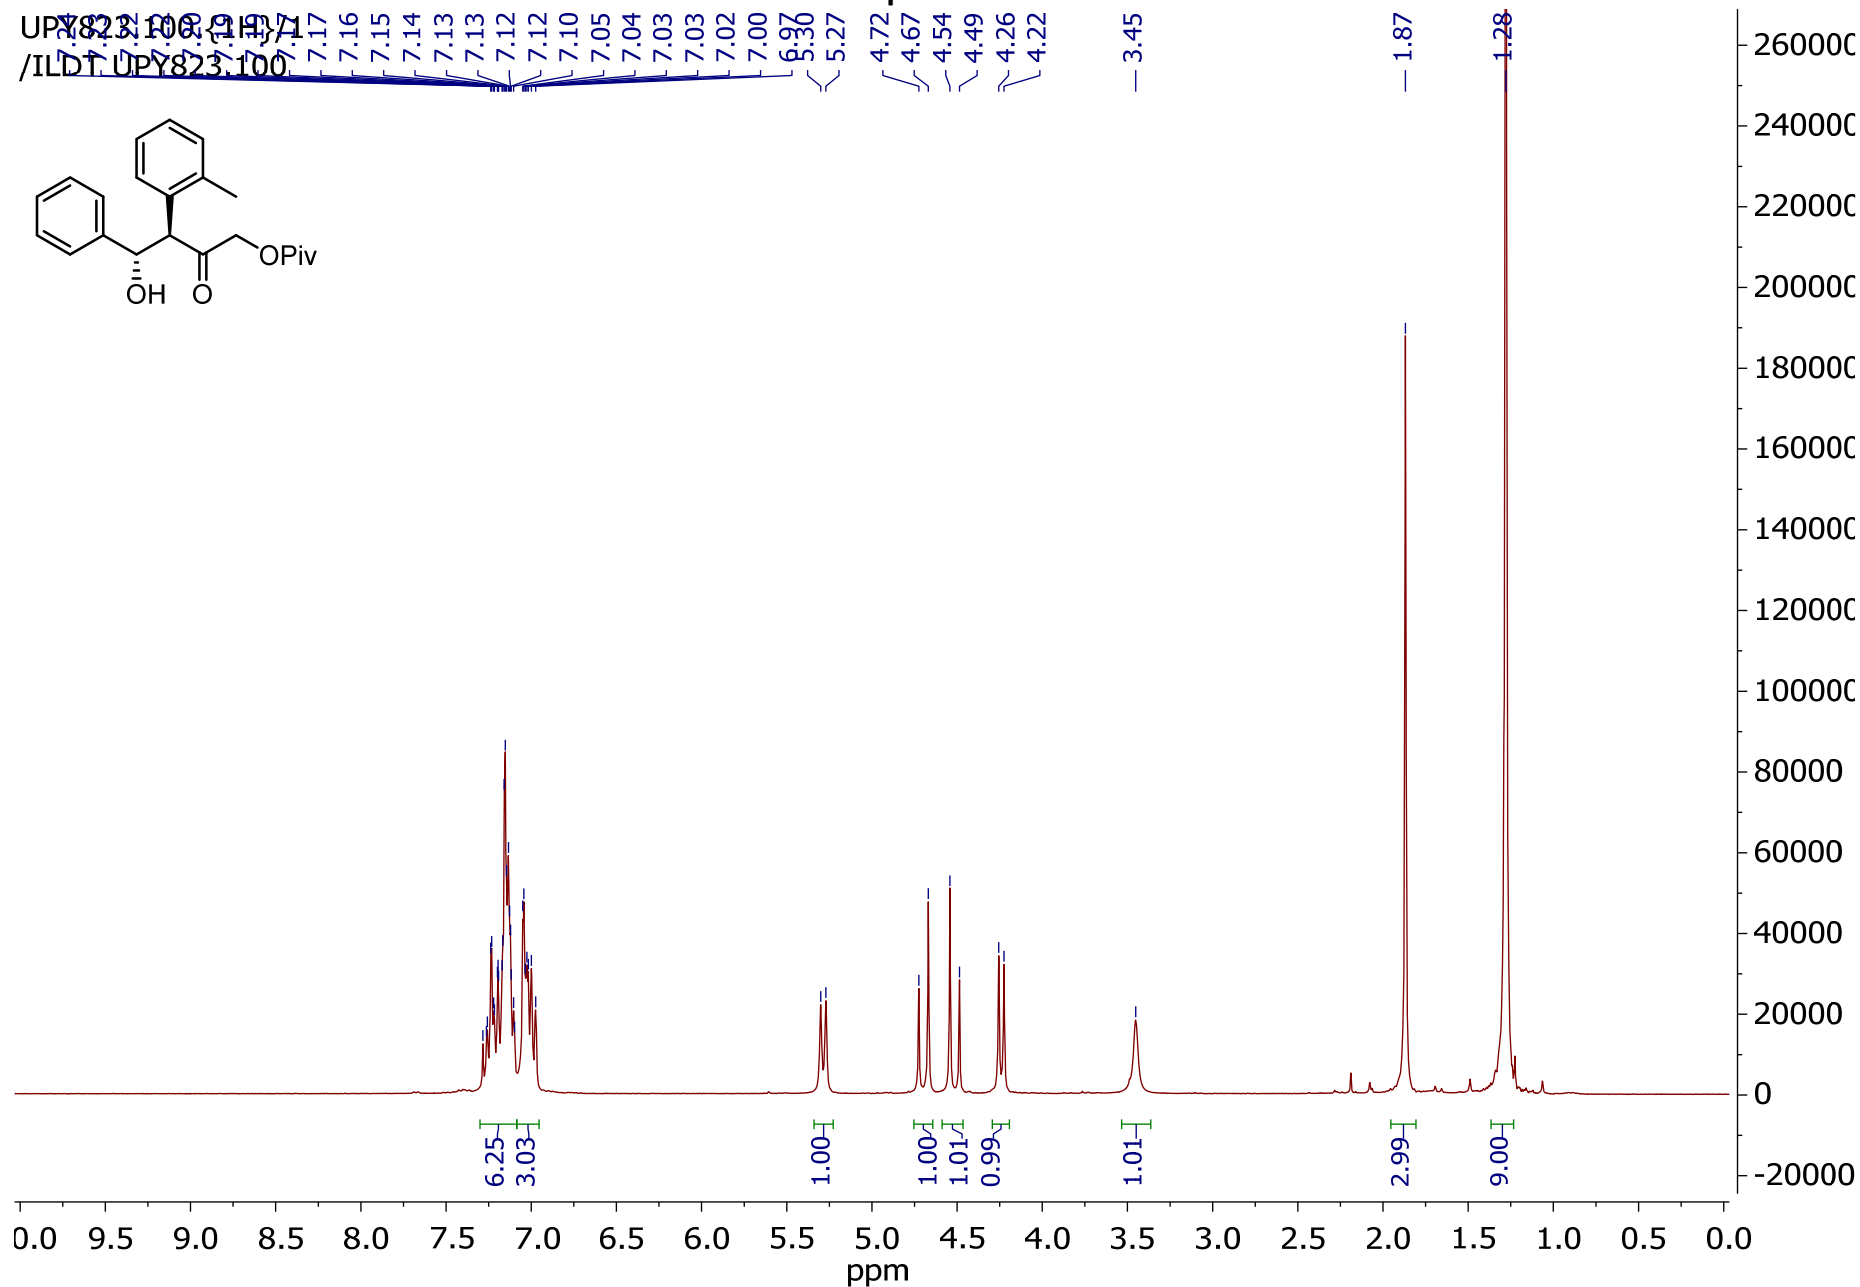



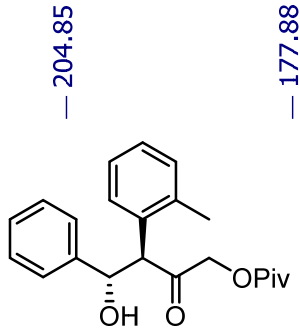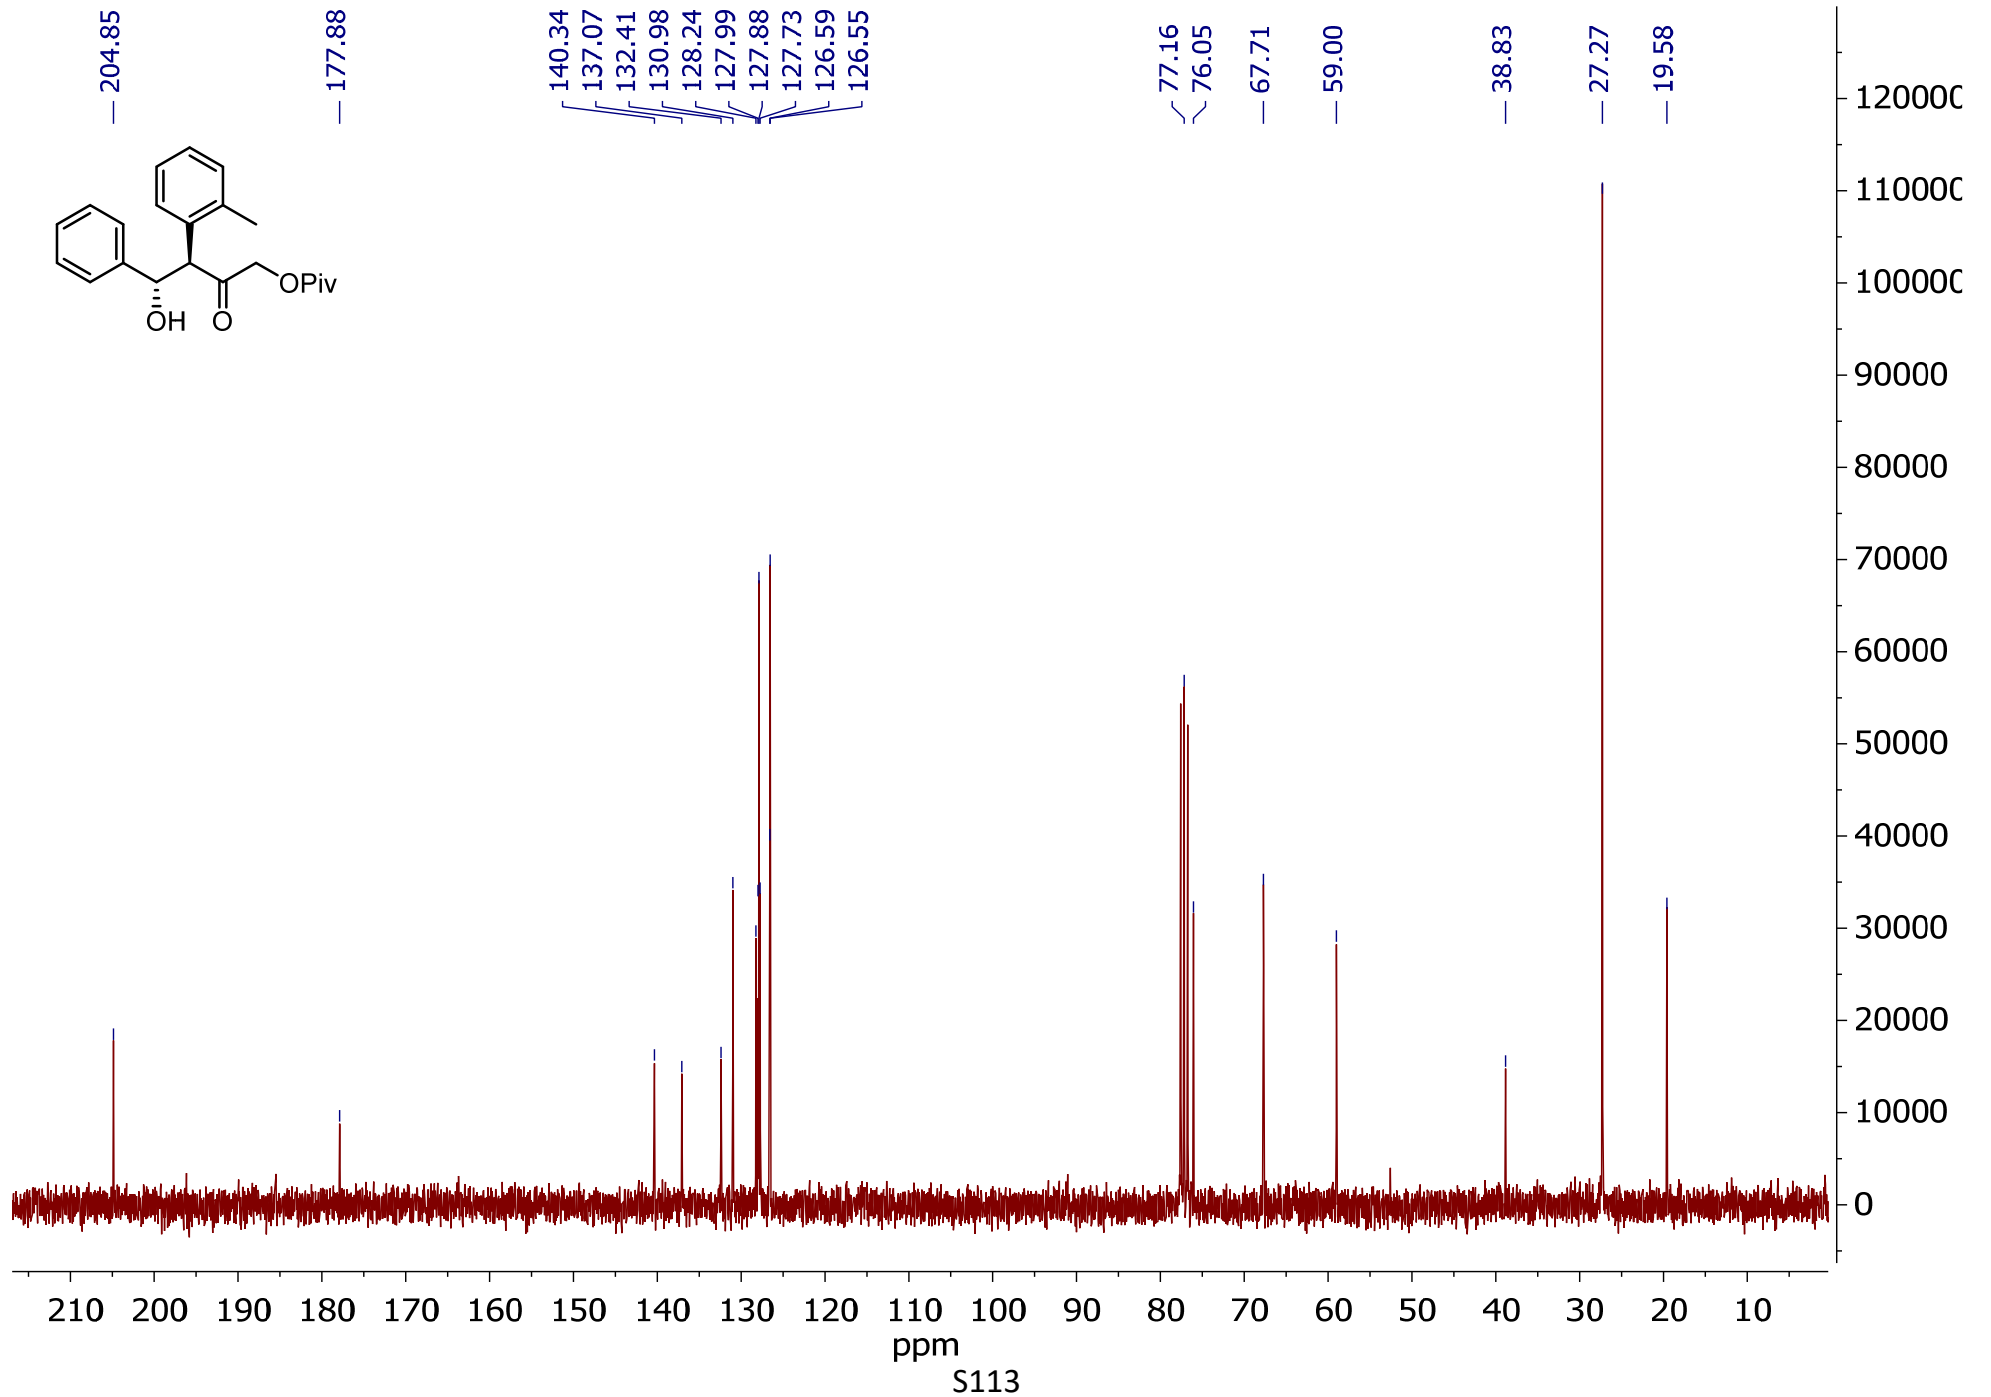

UPY823.100.{13C}deptsp135/3  
/ILDIT UPY823.100

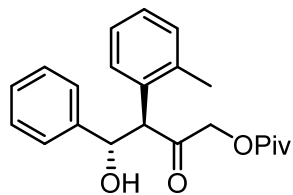

130.98  
128.23  
127.99  
127.87  
127.73  
126.58  
126.54

76.05  
67.71  
59.00  
27.27  
19.58

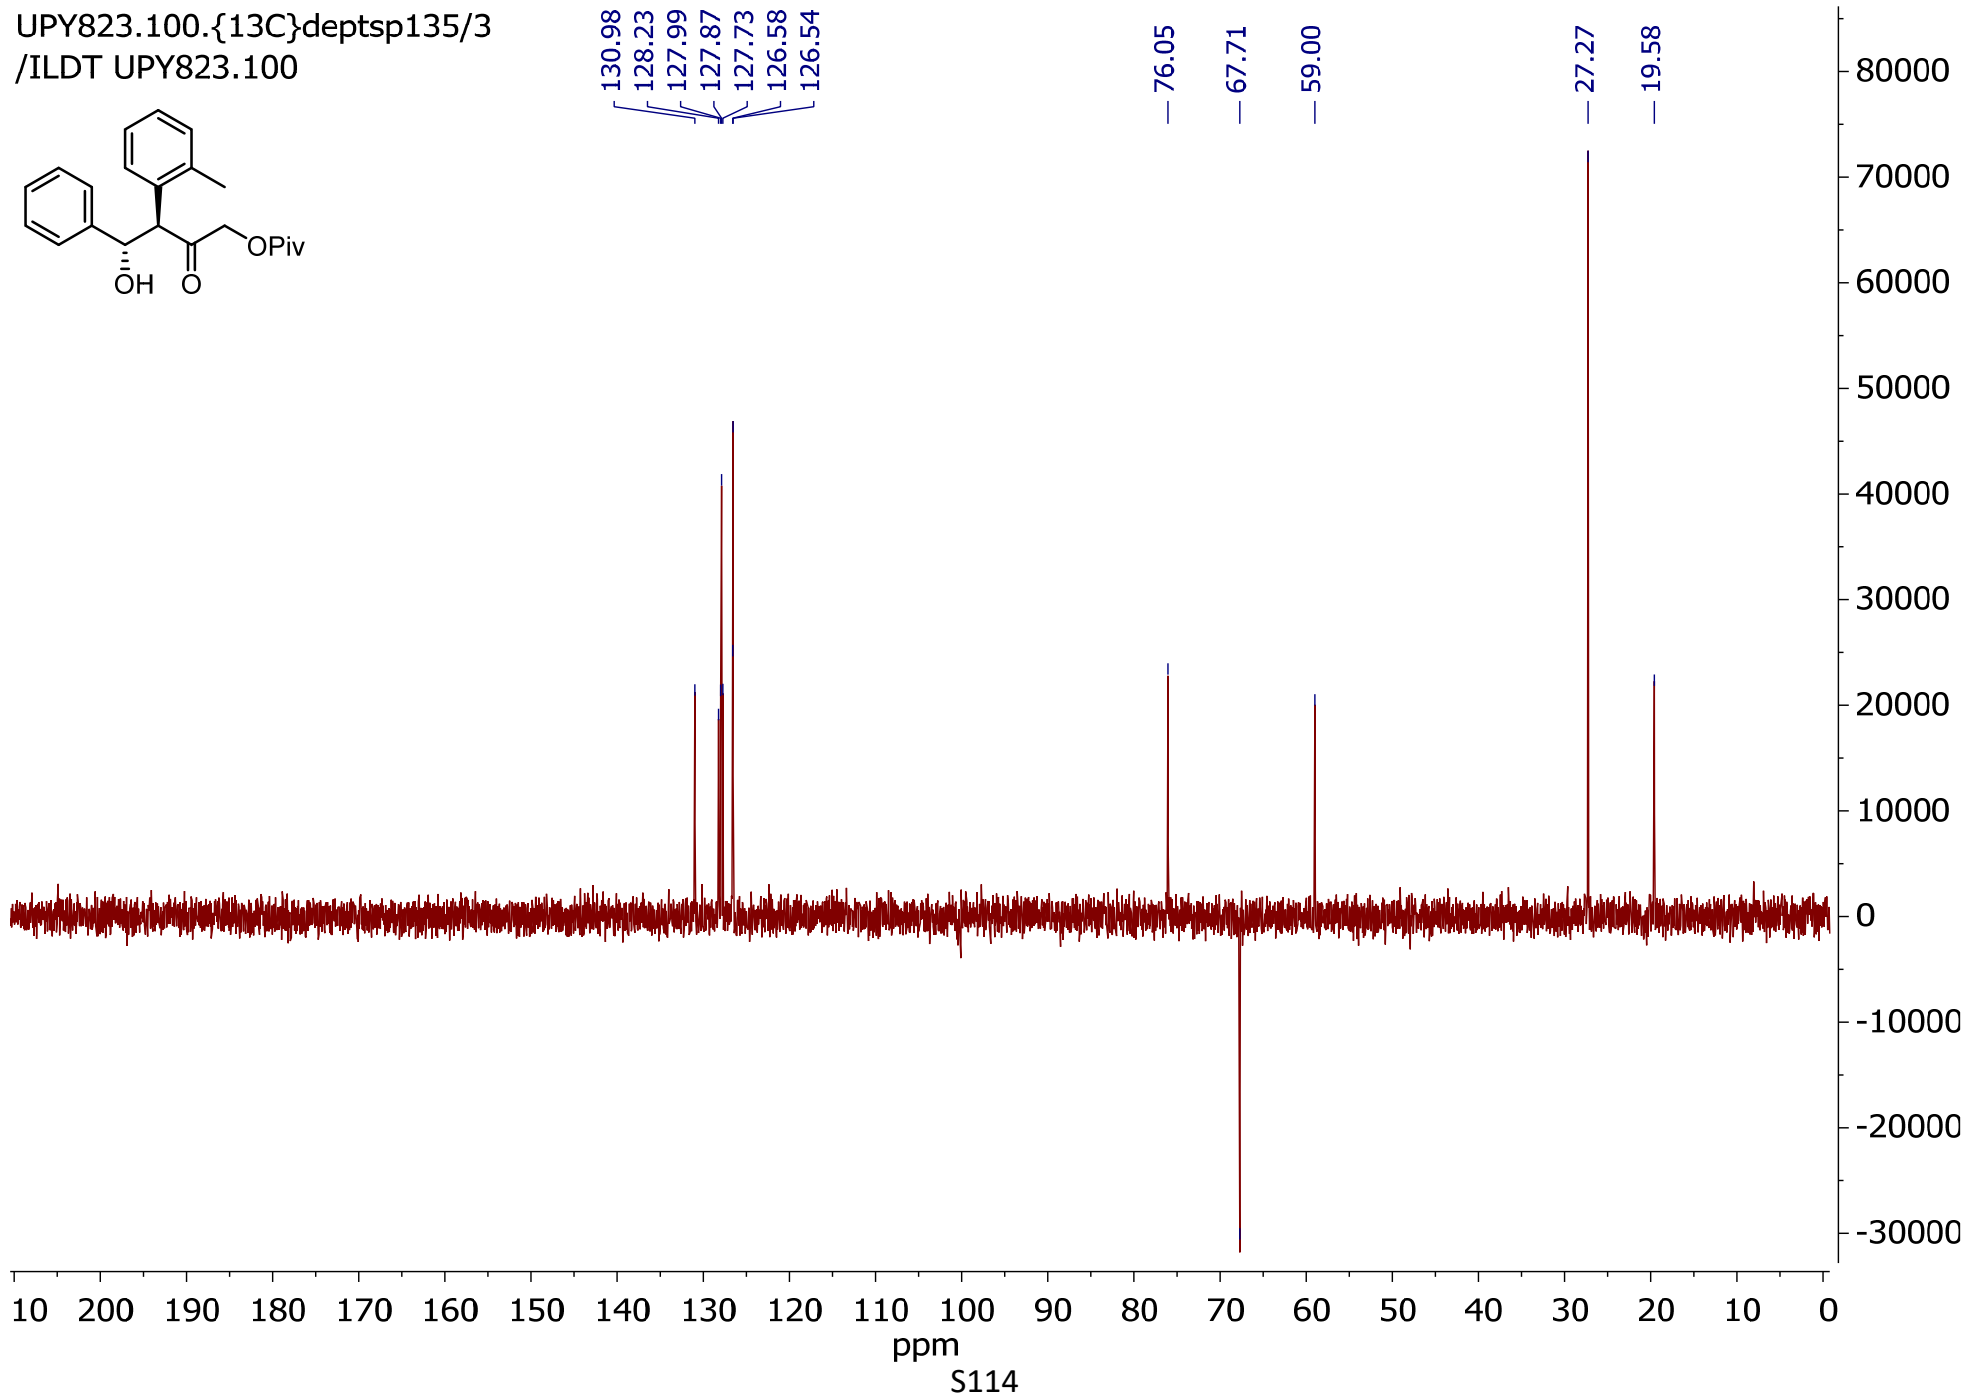

UPY844.100.{1H}/1  
/ILDT UPY844.100

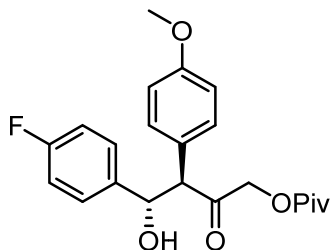

### NMR spectra of 15e

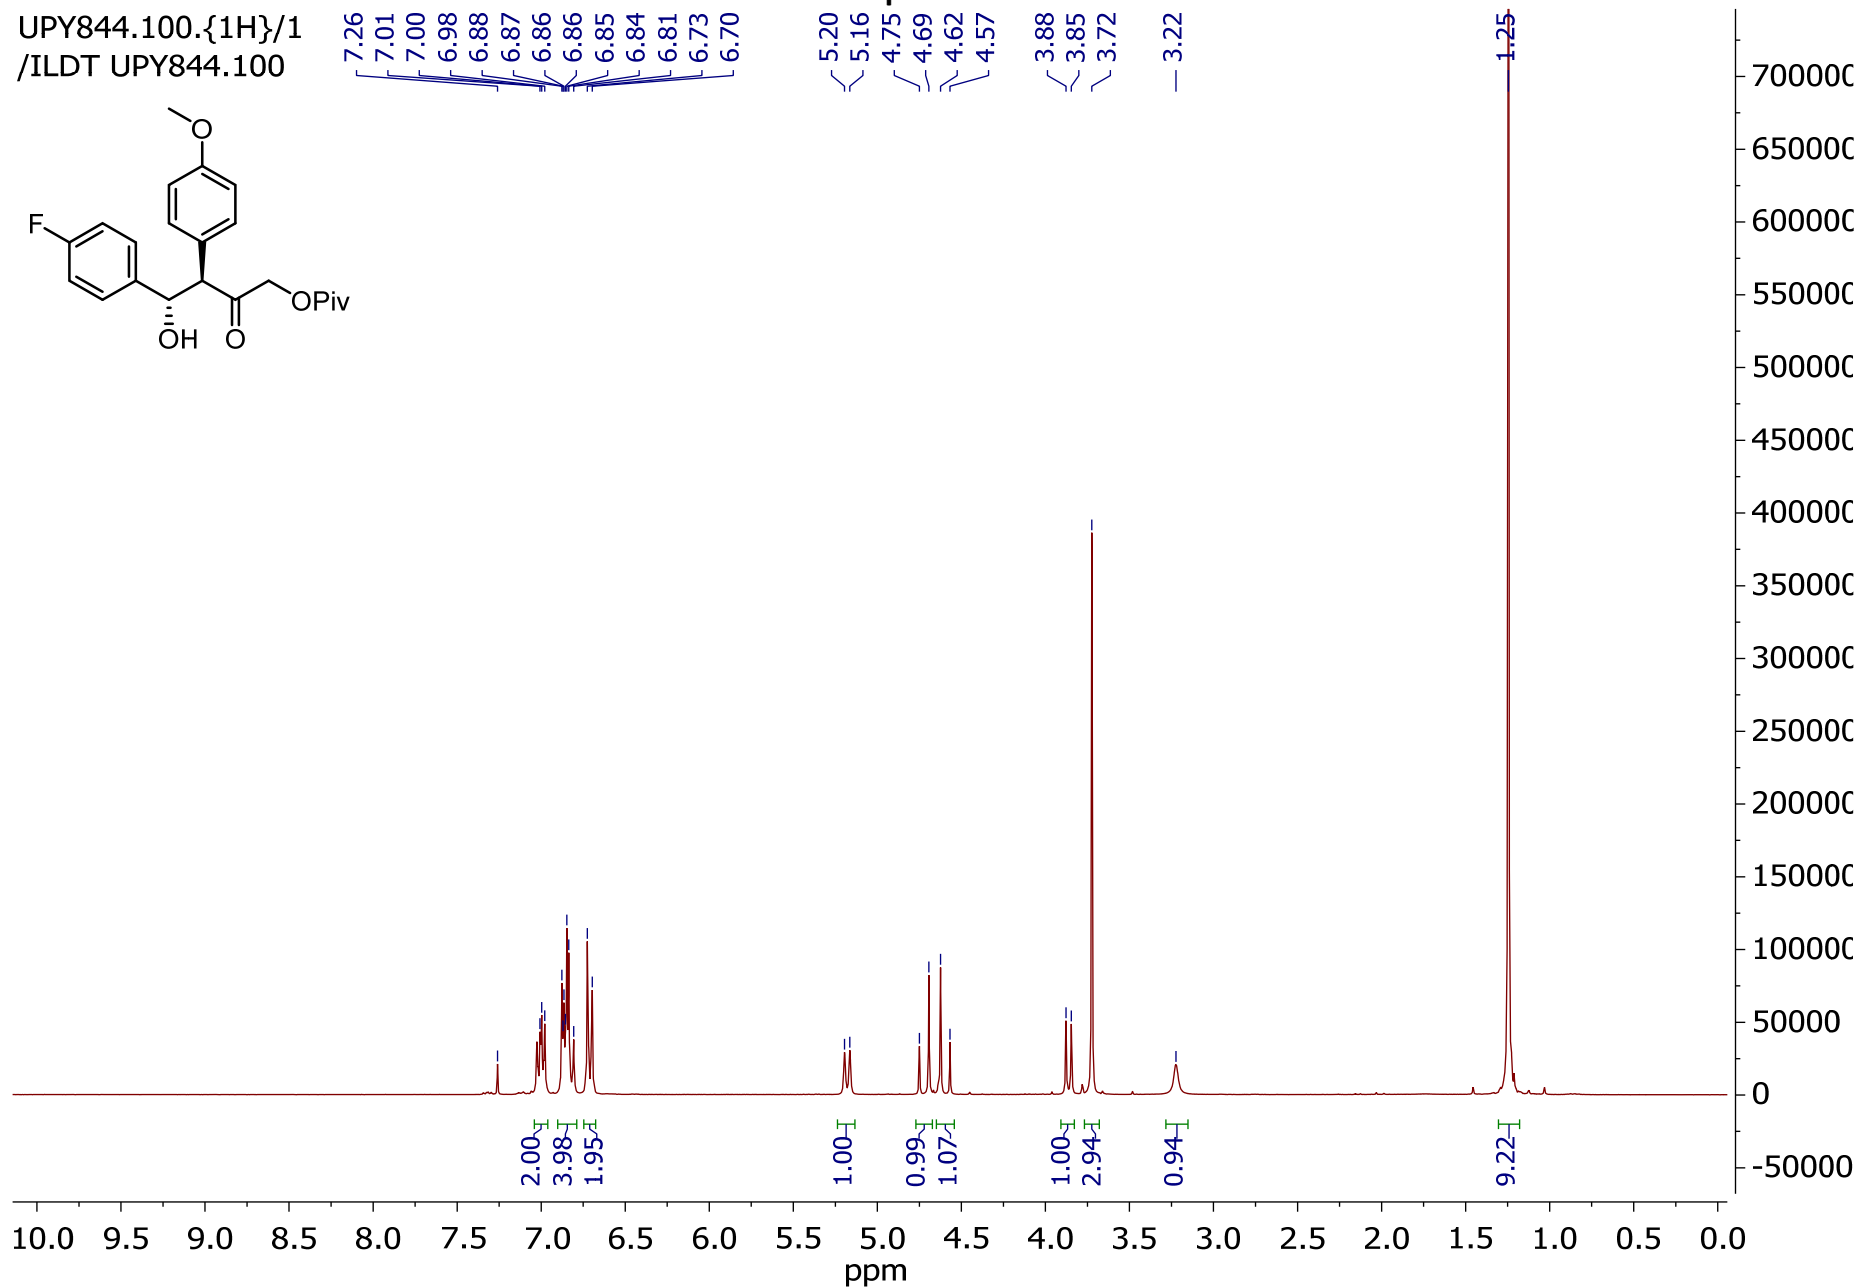

UPY844.100.{13C}/2  
/ILDTPY844.100

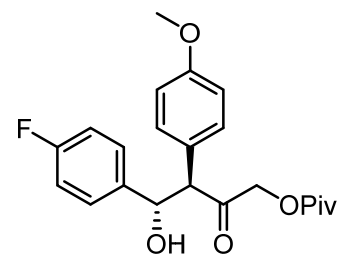

163.86  
160.61  
159.32  
136.70  
136.66  
130.14  
128.42  
128.31  
125.77  
115.10  
114.82  
114.40

75.48  
67.97  
62.65  
55.27

38.83  
27.28

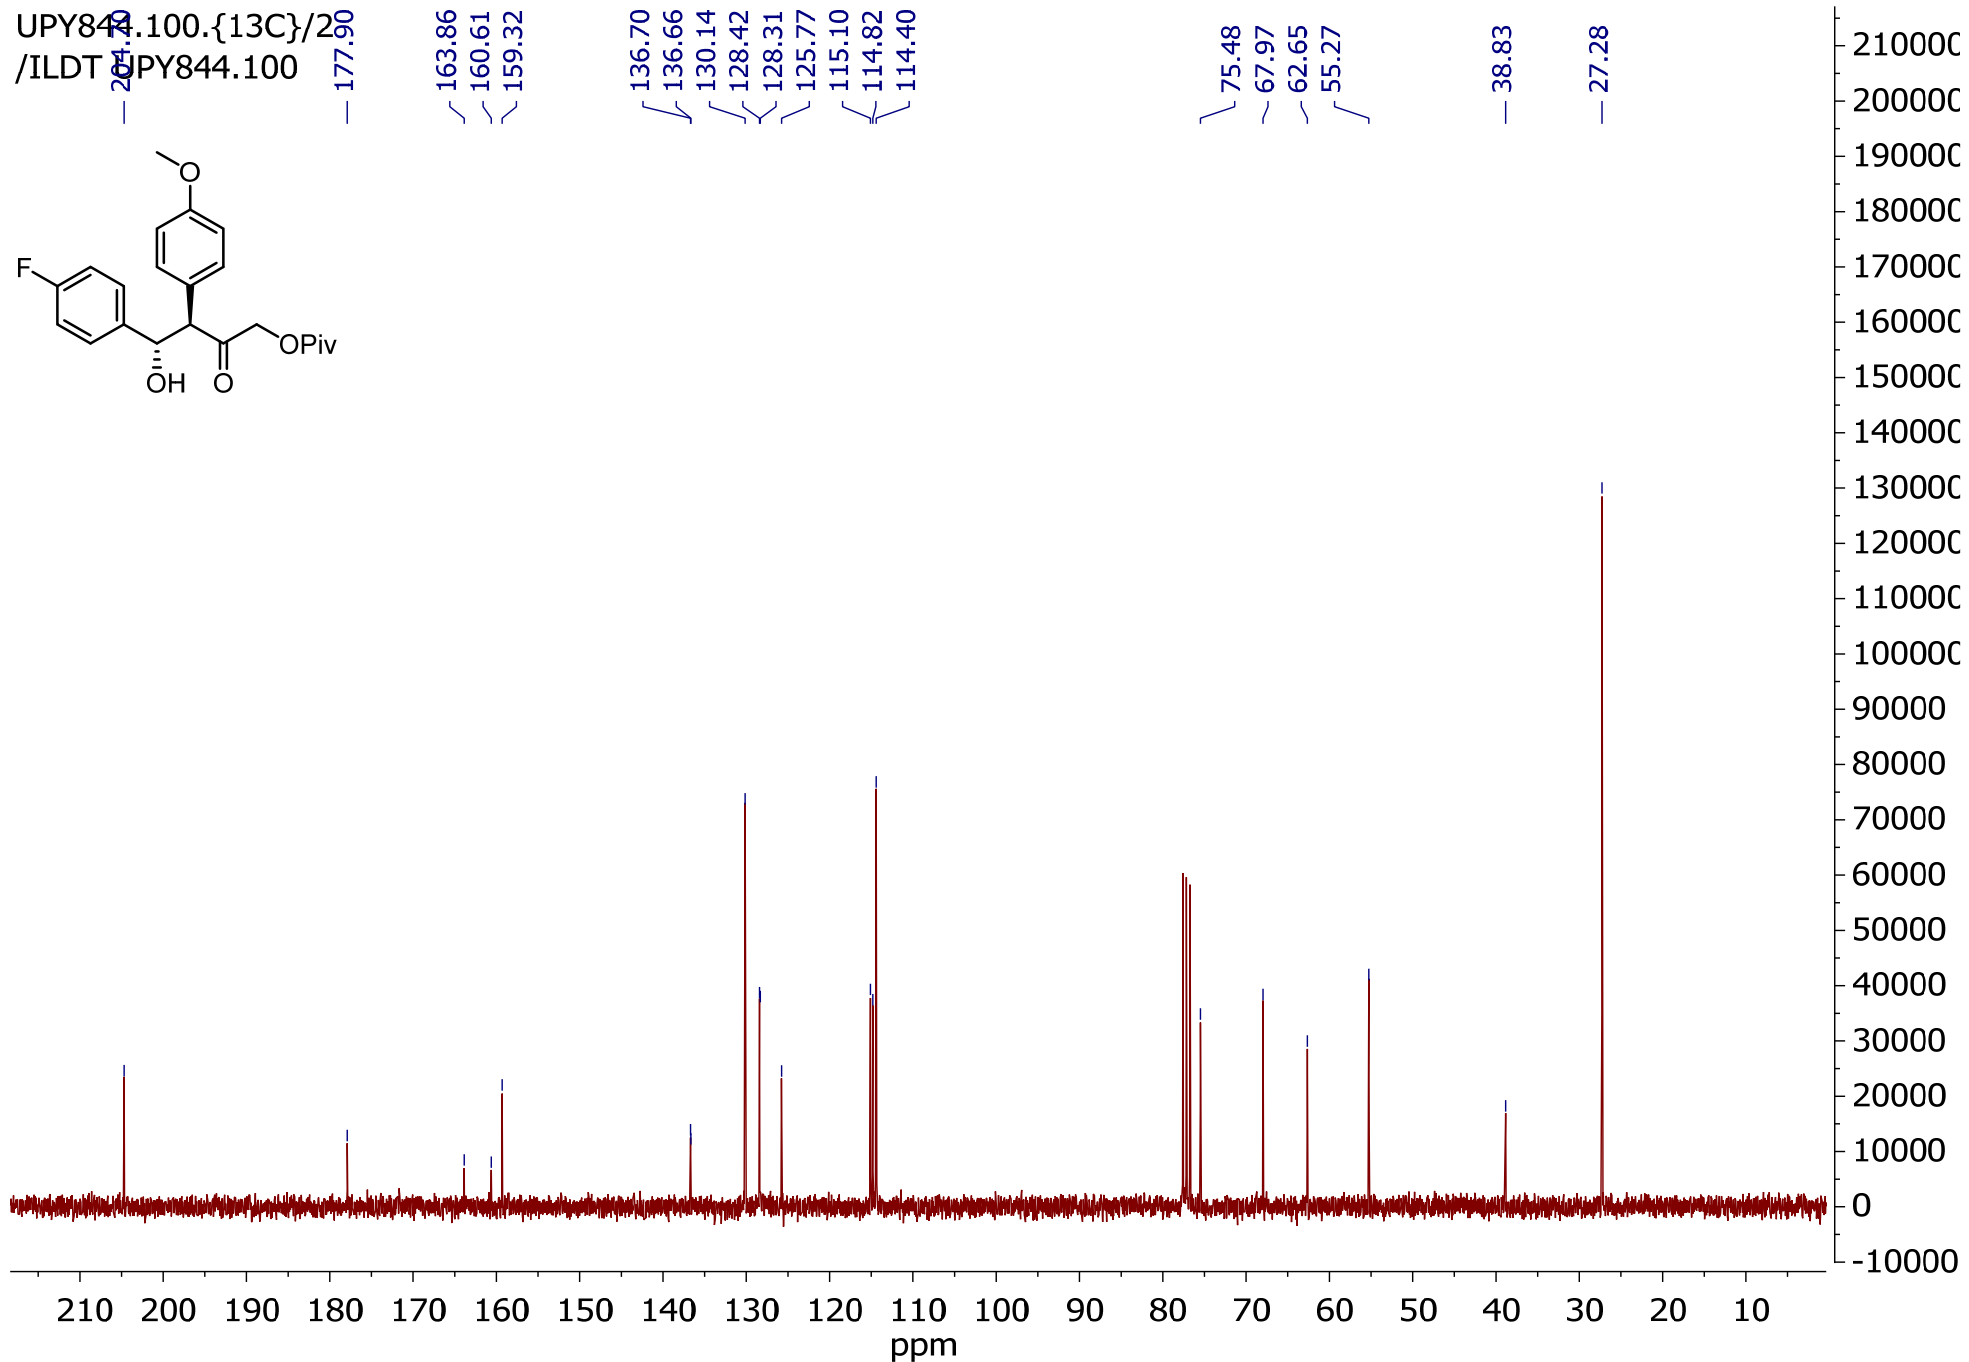

S116

UPY844.100.{13C}deptsp135/3  
/ILDT UPY844.100

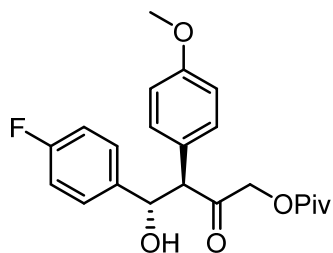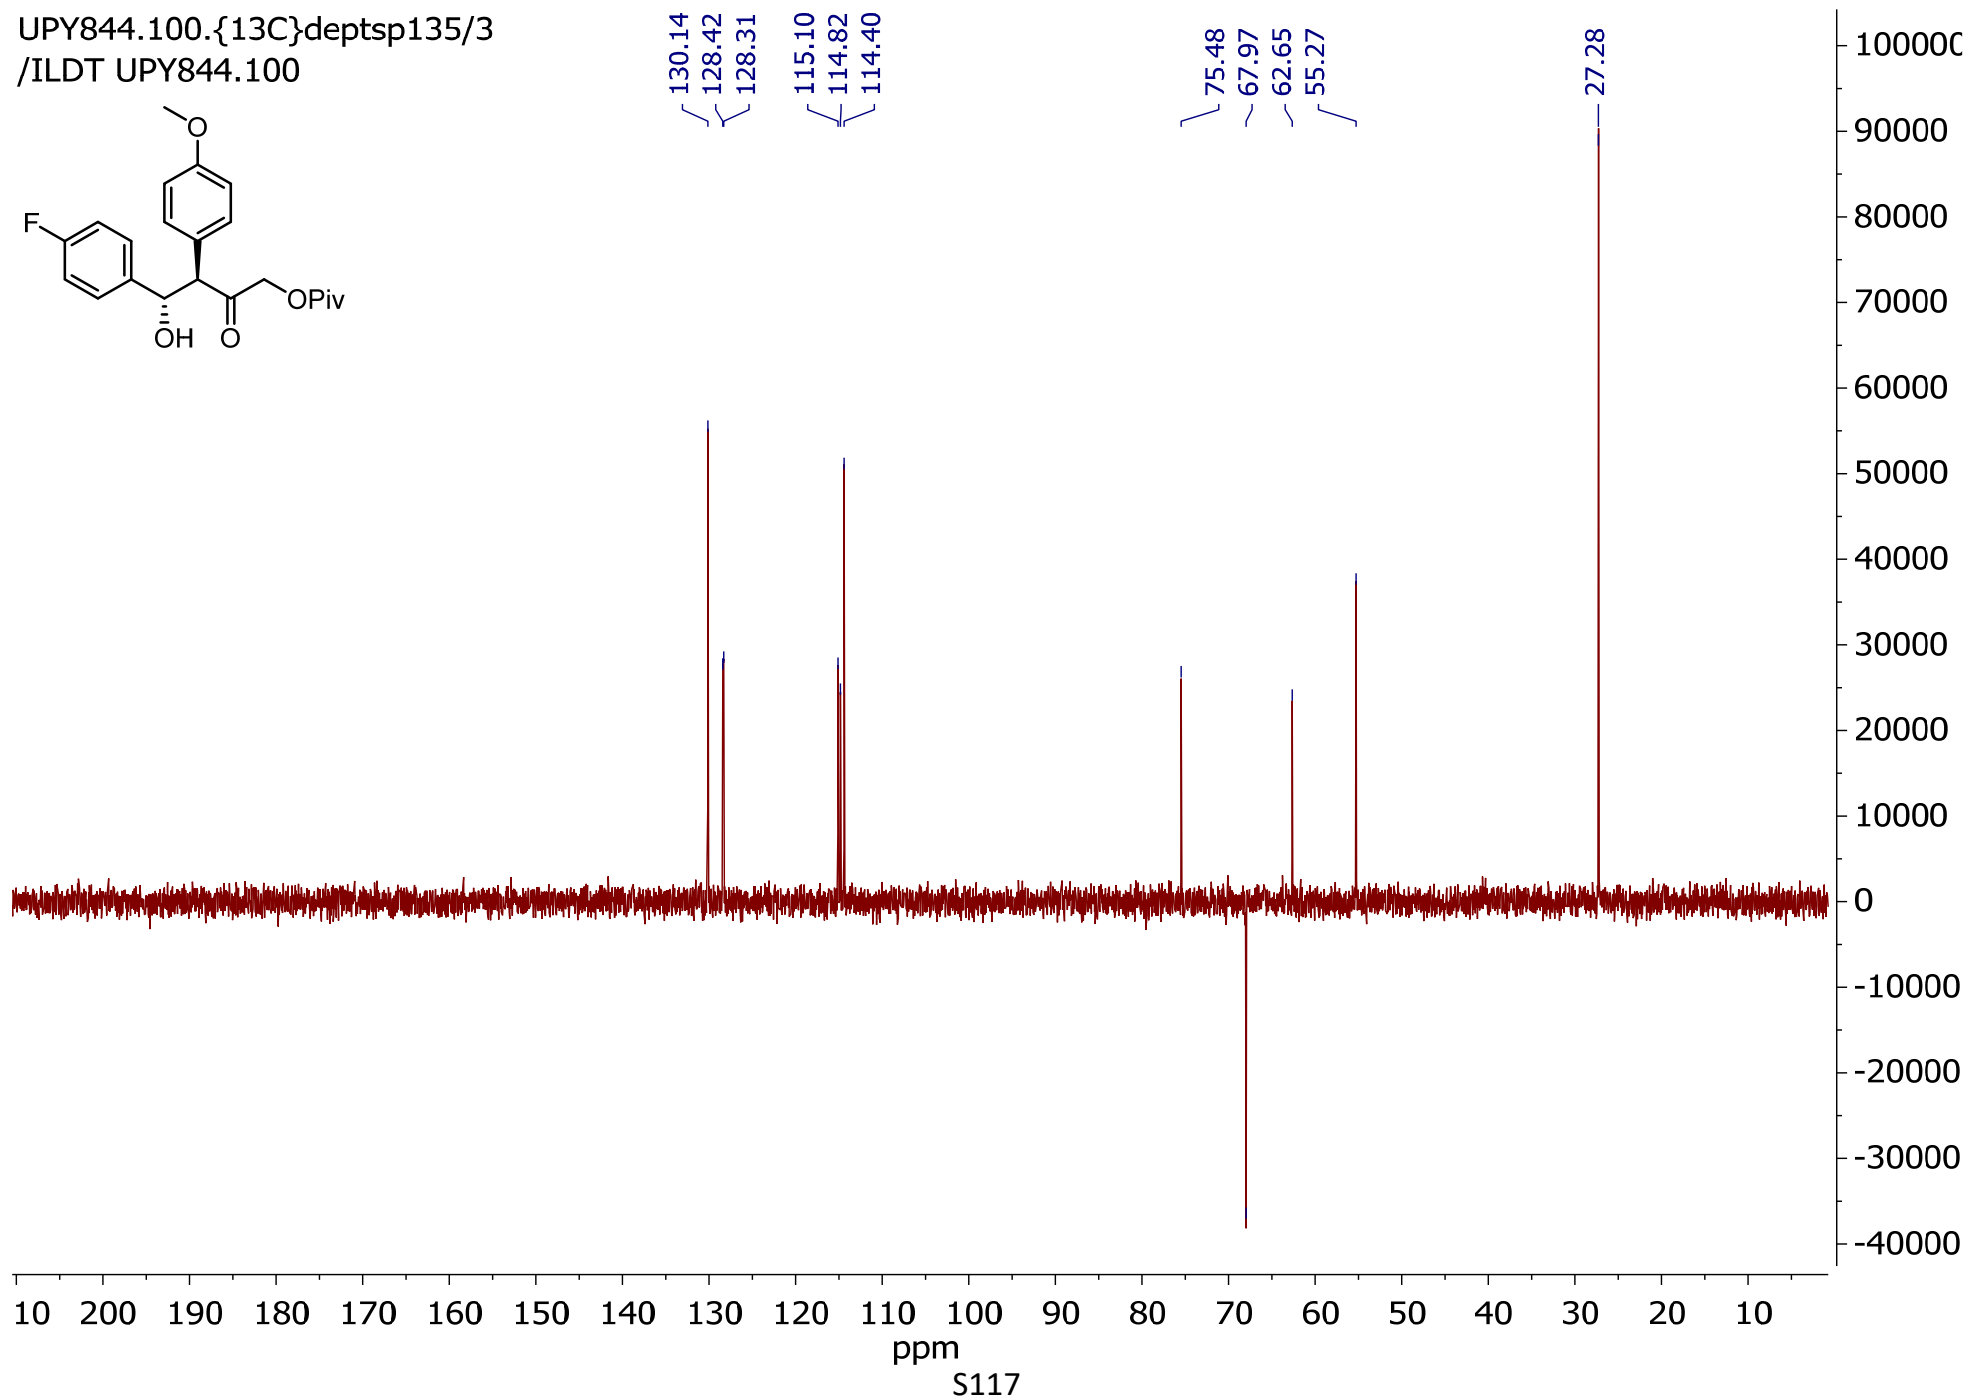

UPY844.100.{19F}/19  
/ILD T UPY844.100

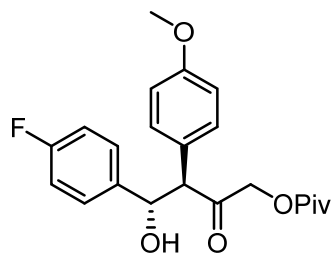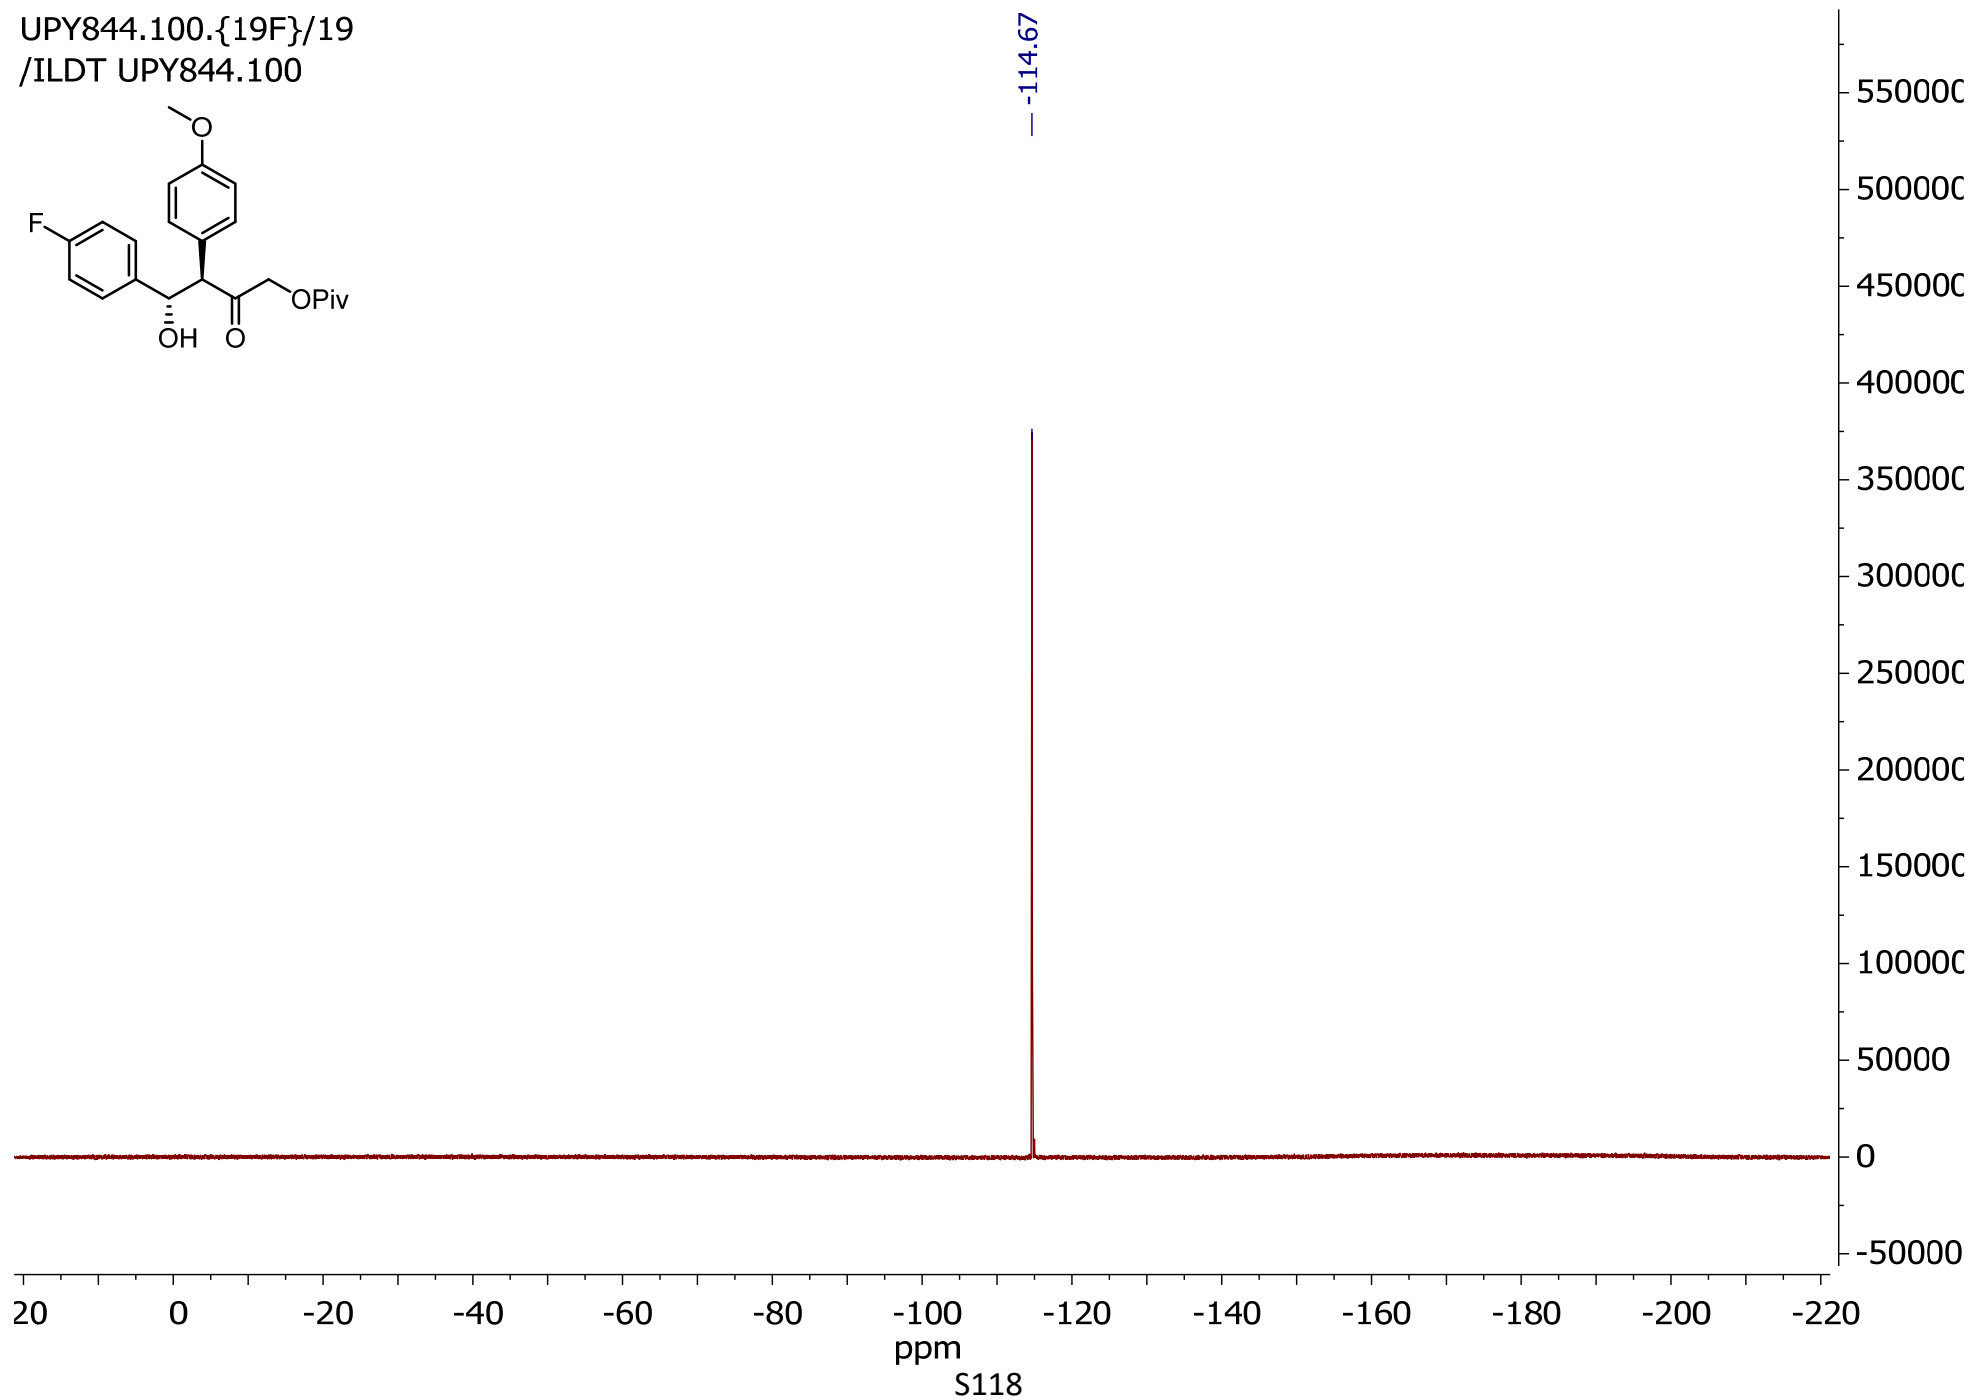

UPY846.100.{1H}/1

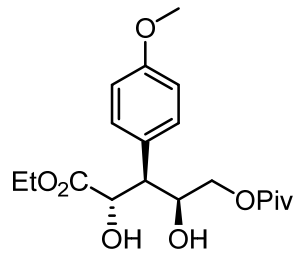

### NMR spectra of 16

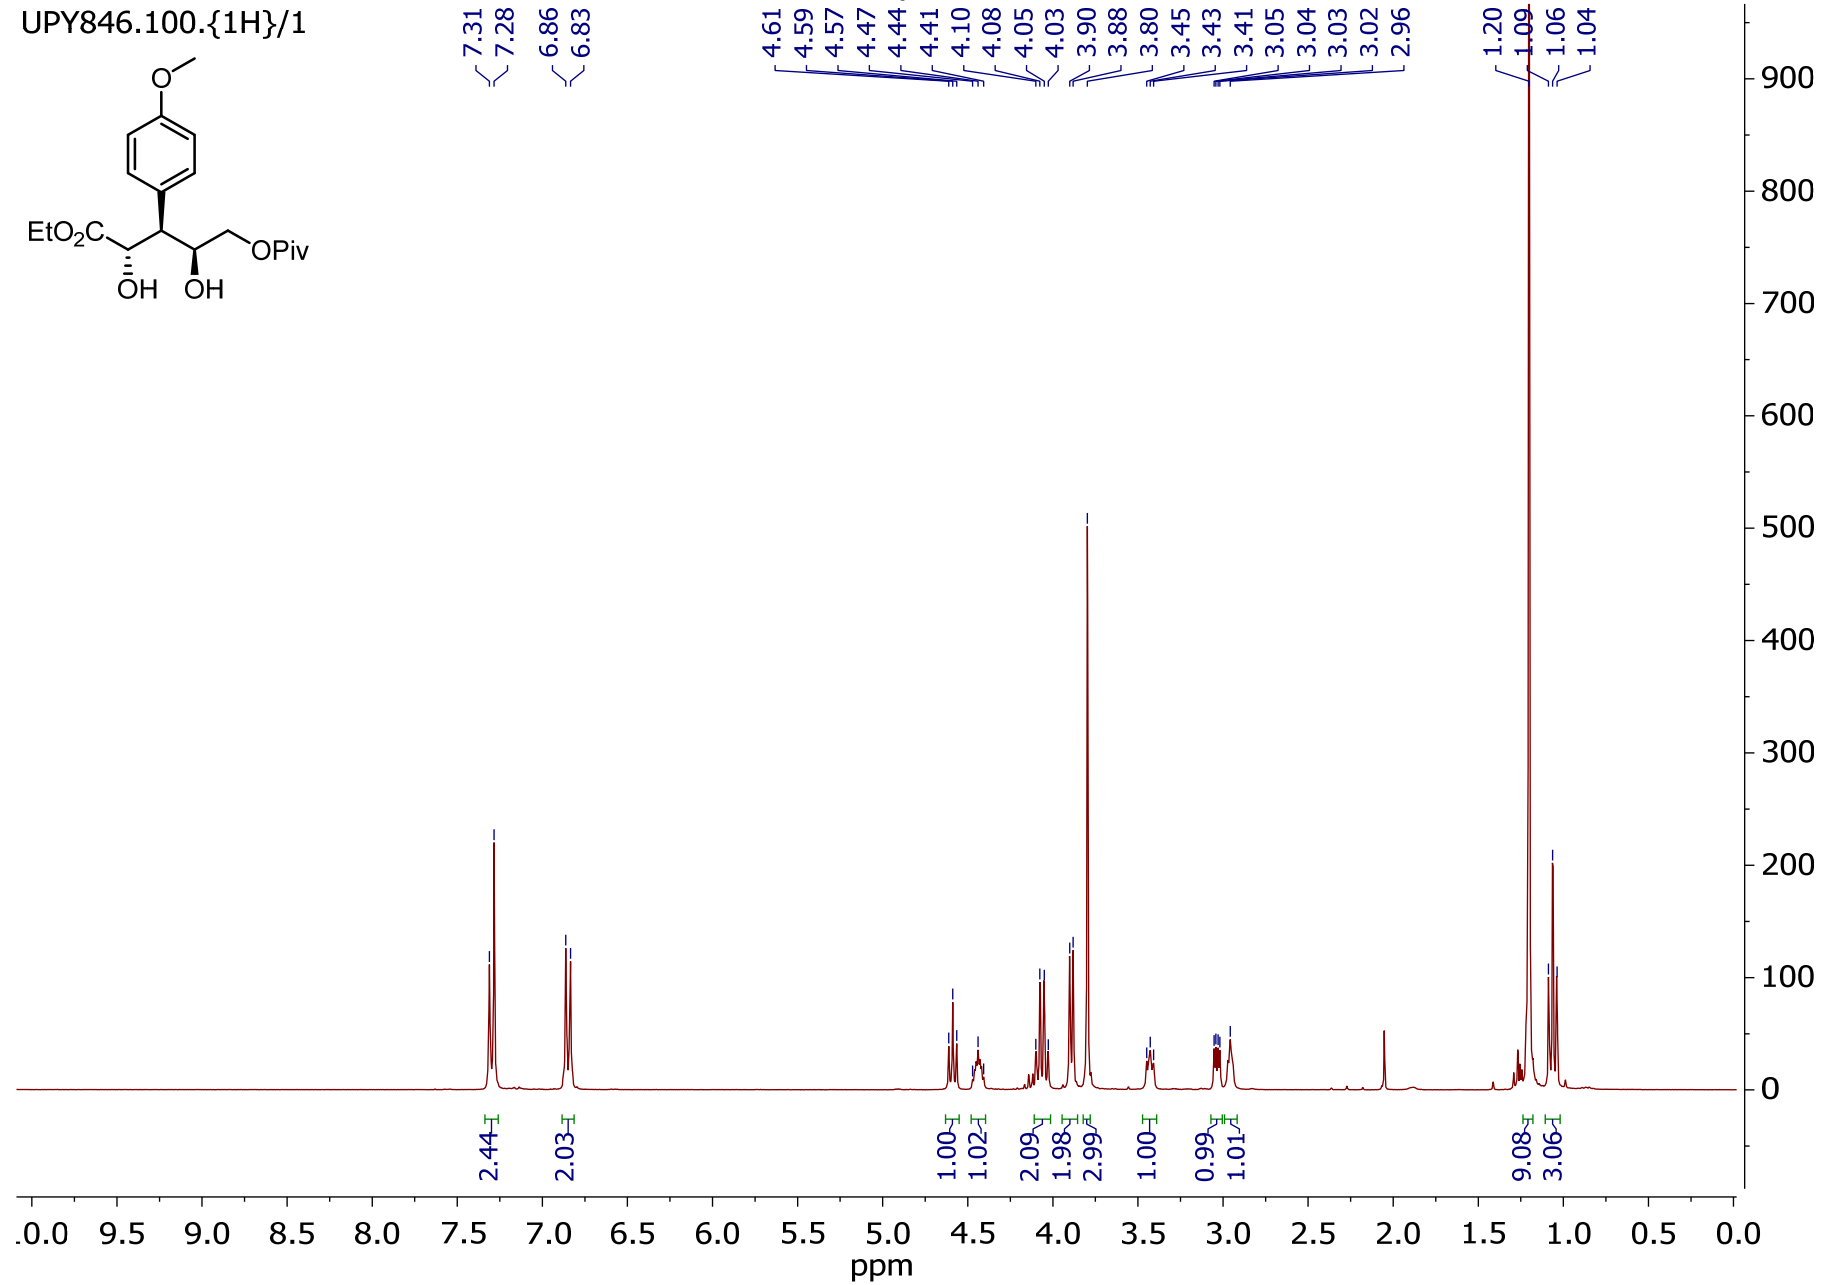

UPY846.100.{13C}/2

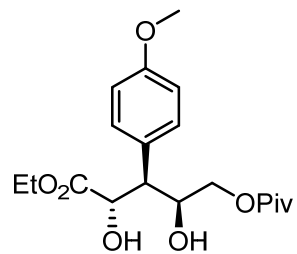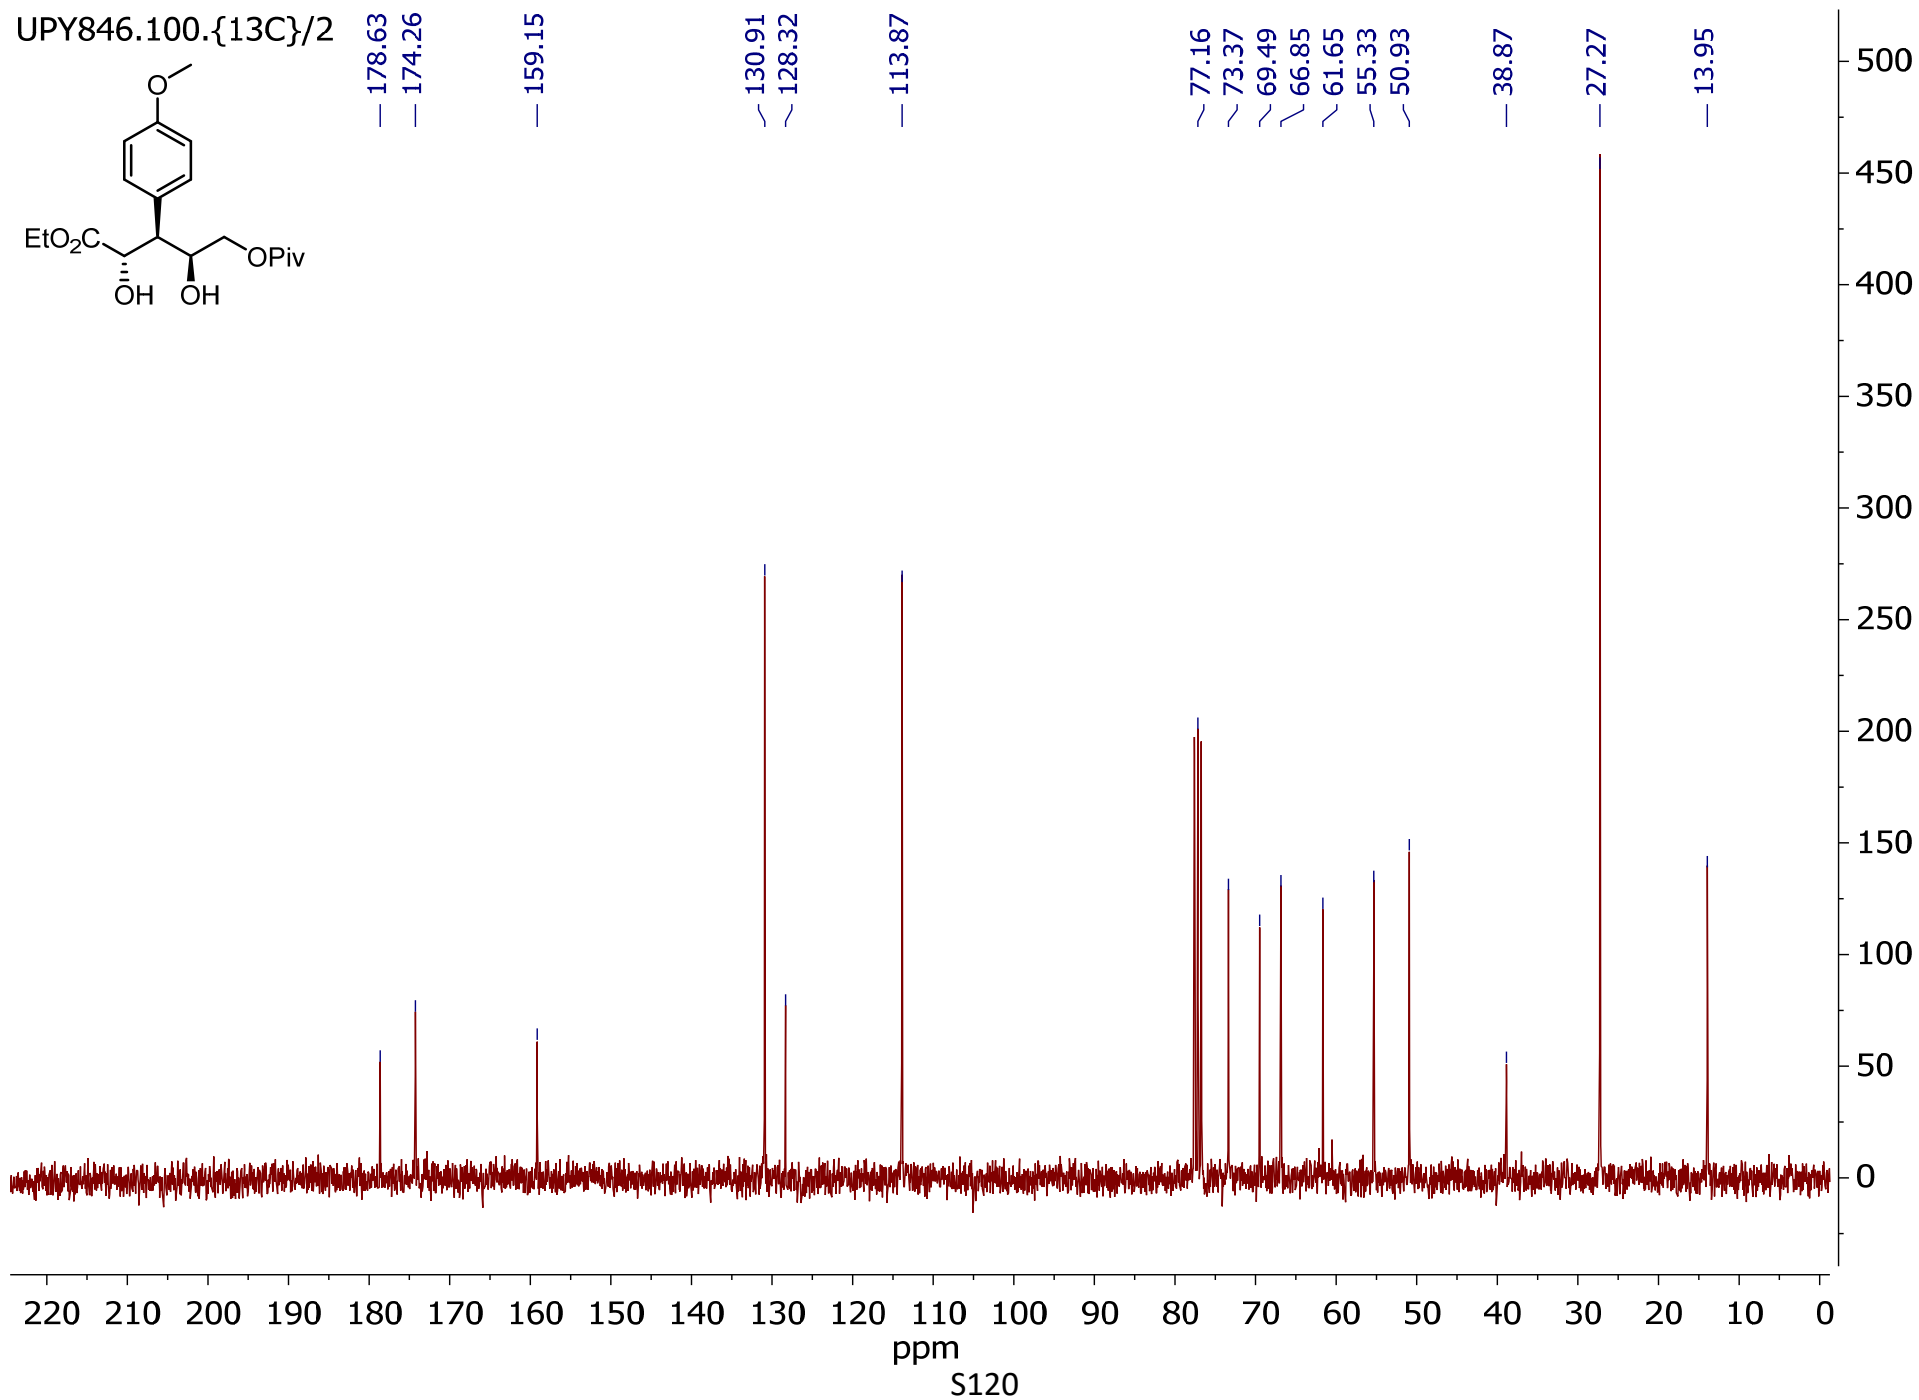



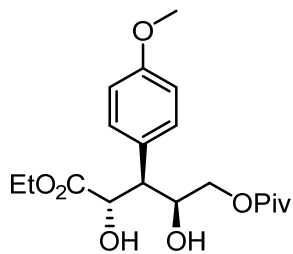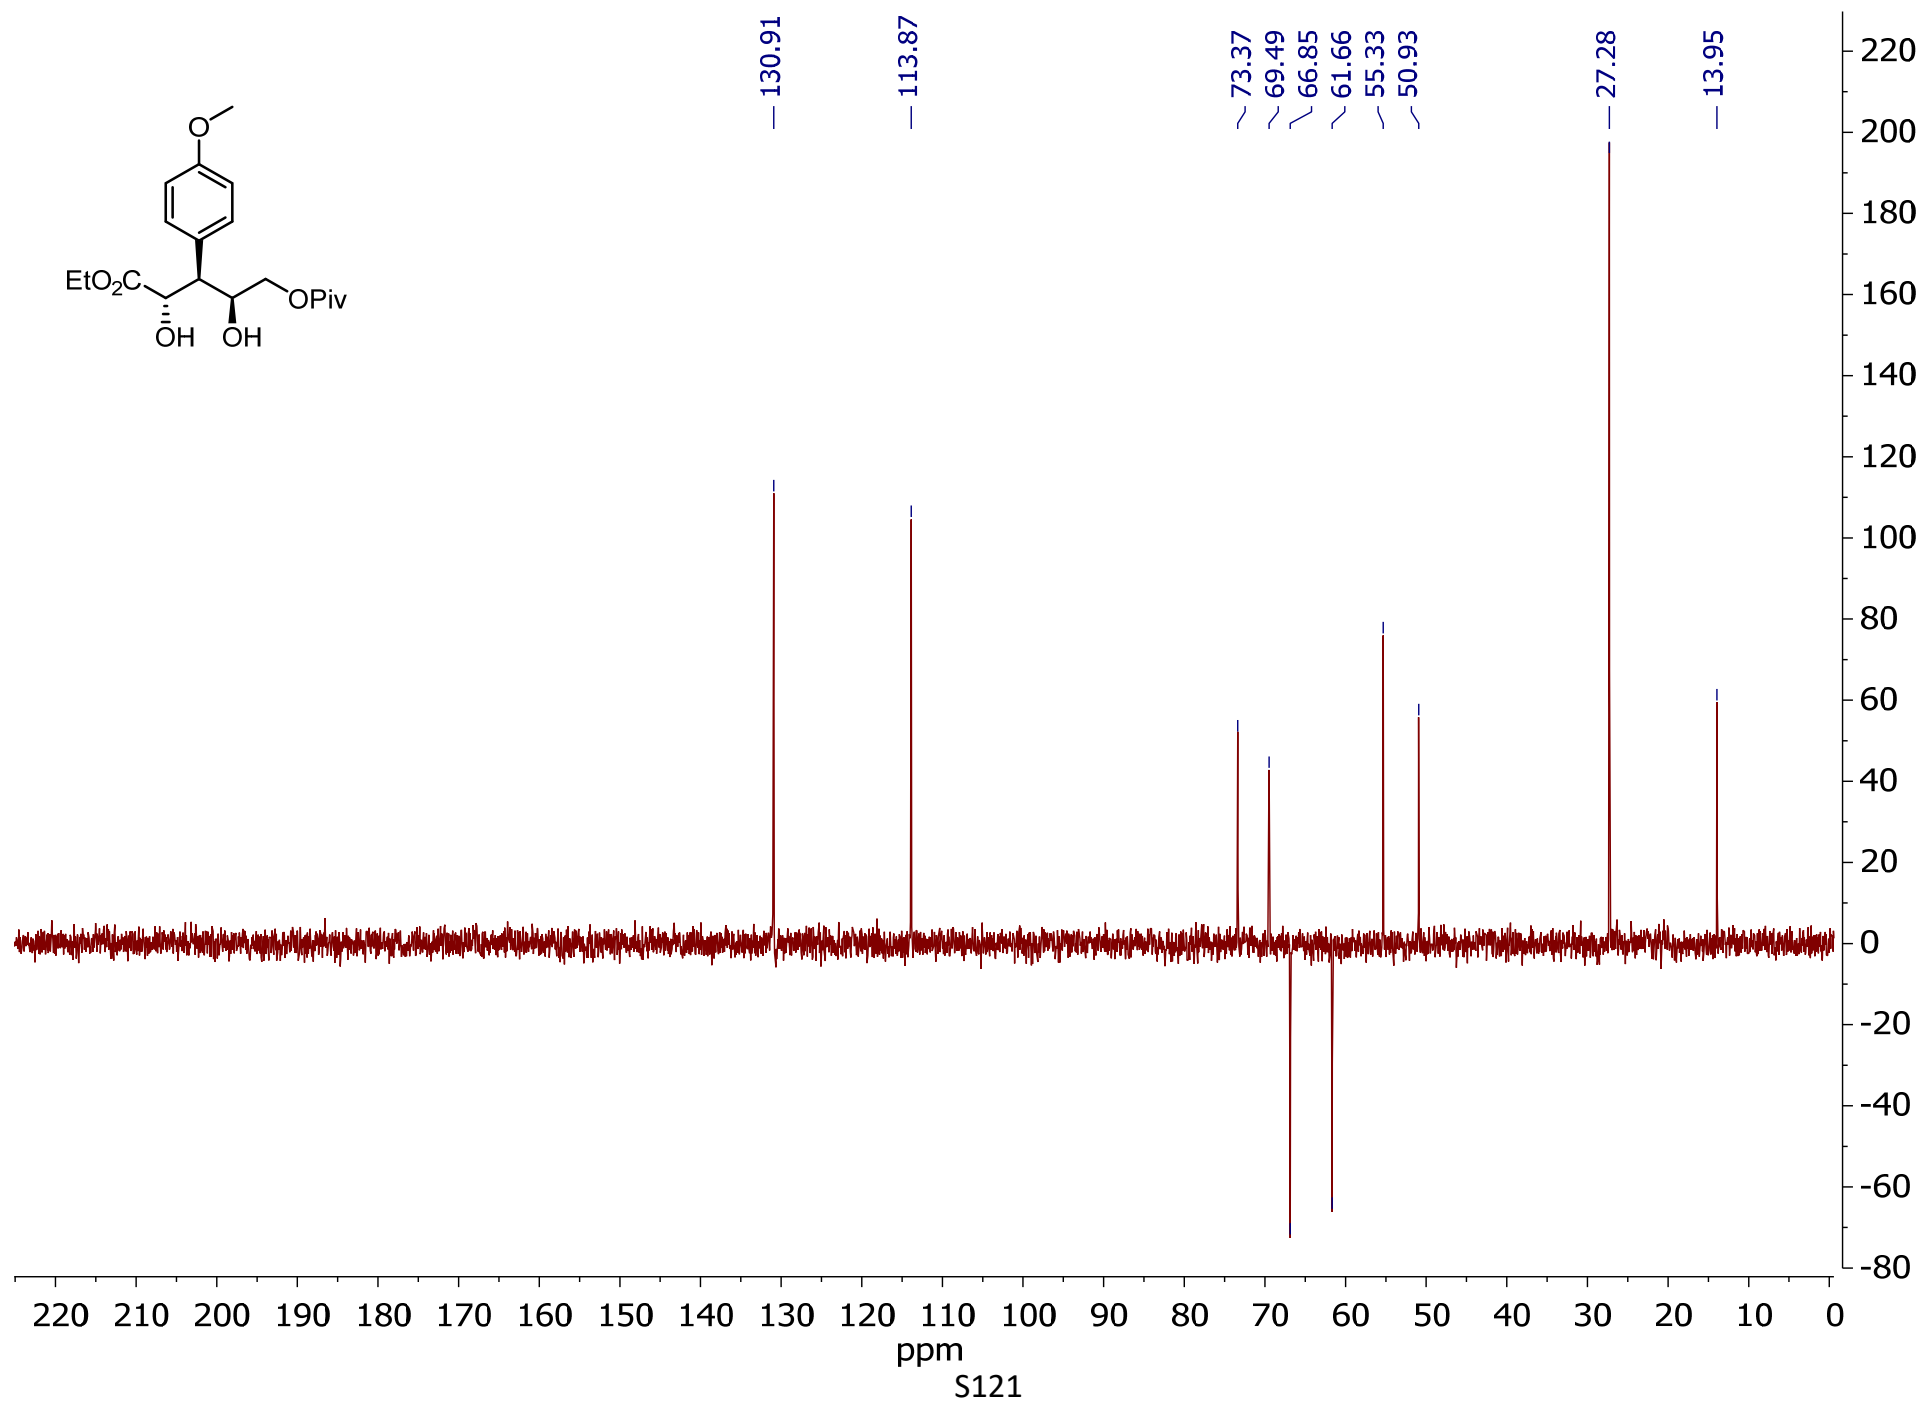

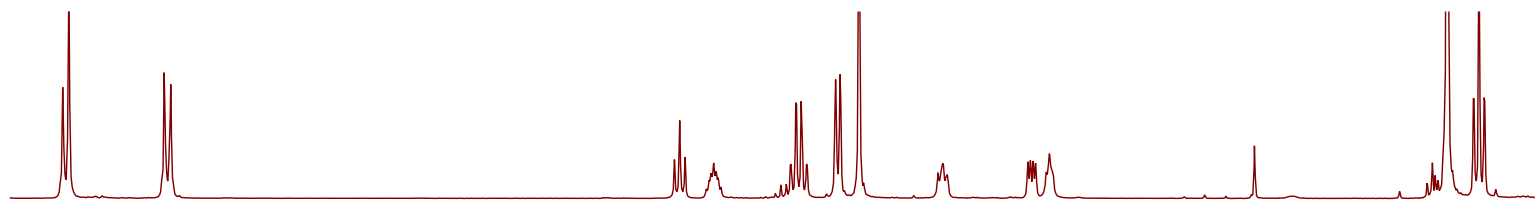

UPY846.100.{1H-13C}HSQC/4

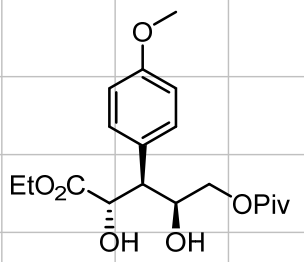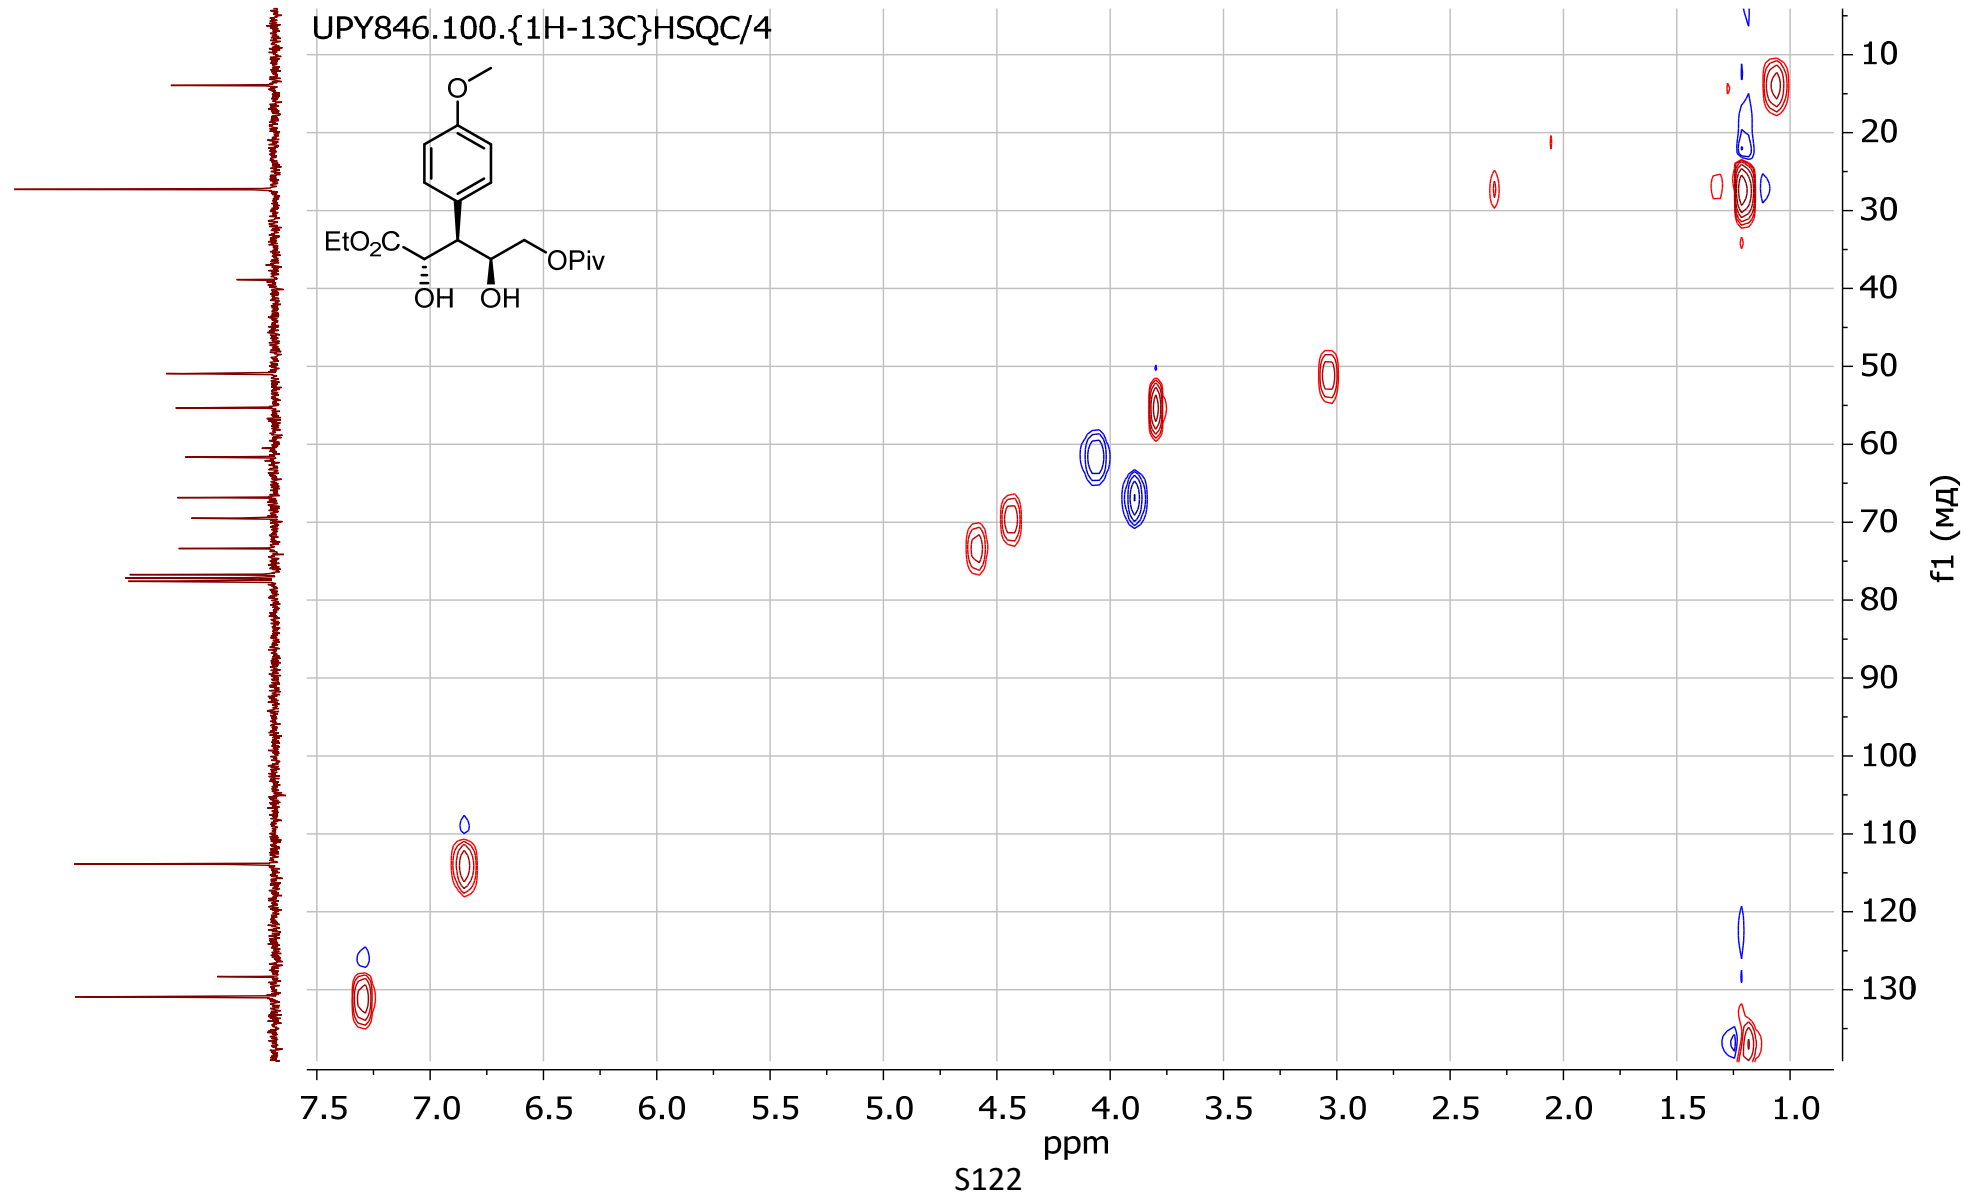

S122

NMR spectra of 17

UPY847.100.1H/1

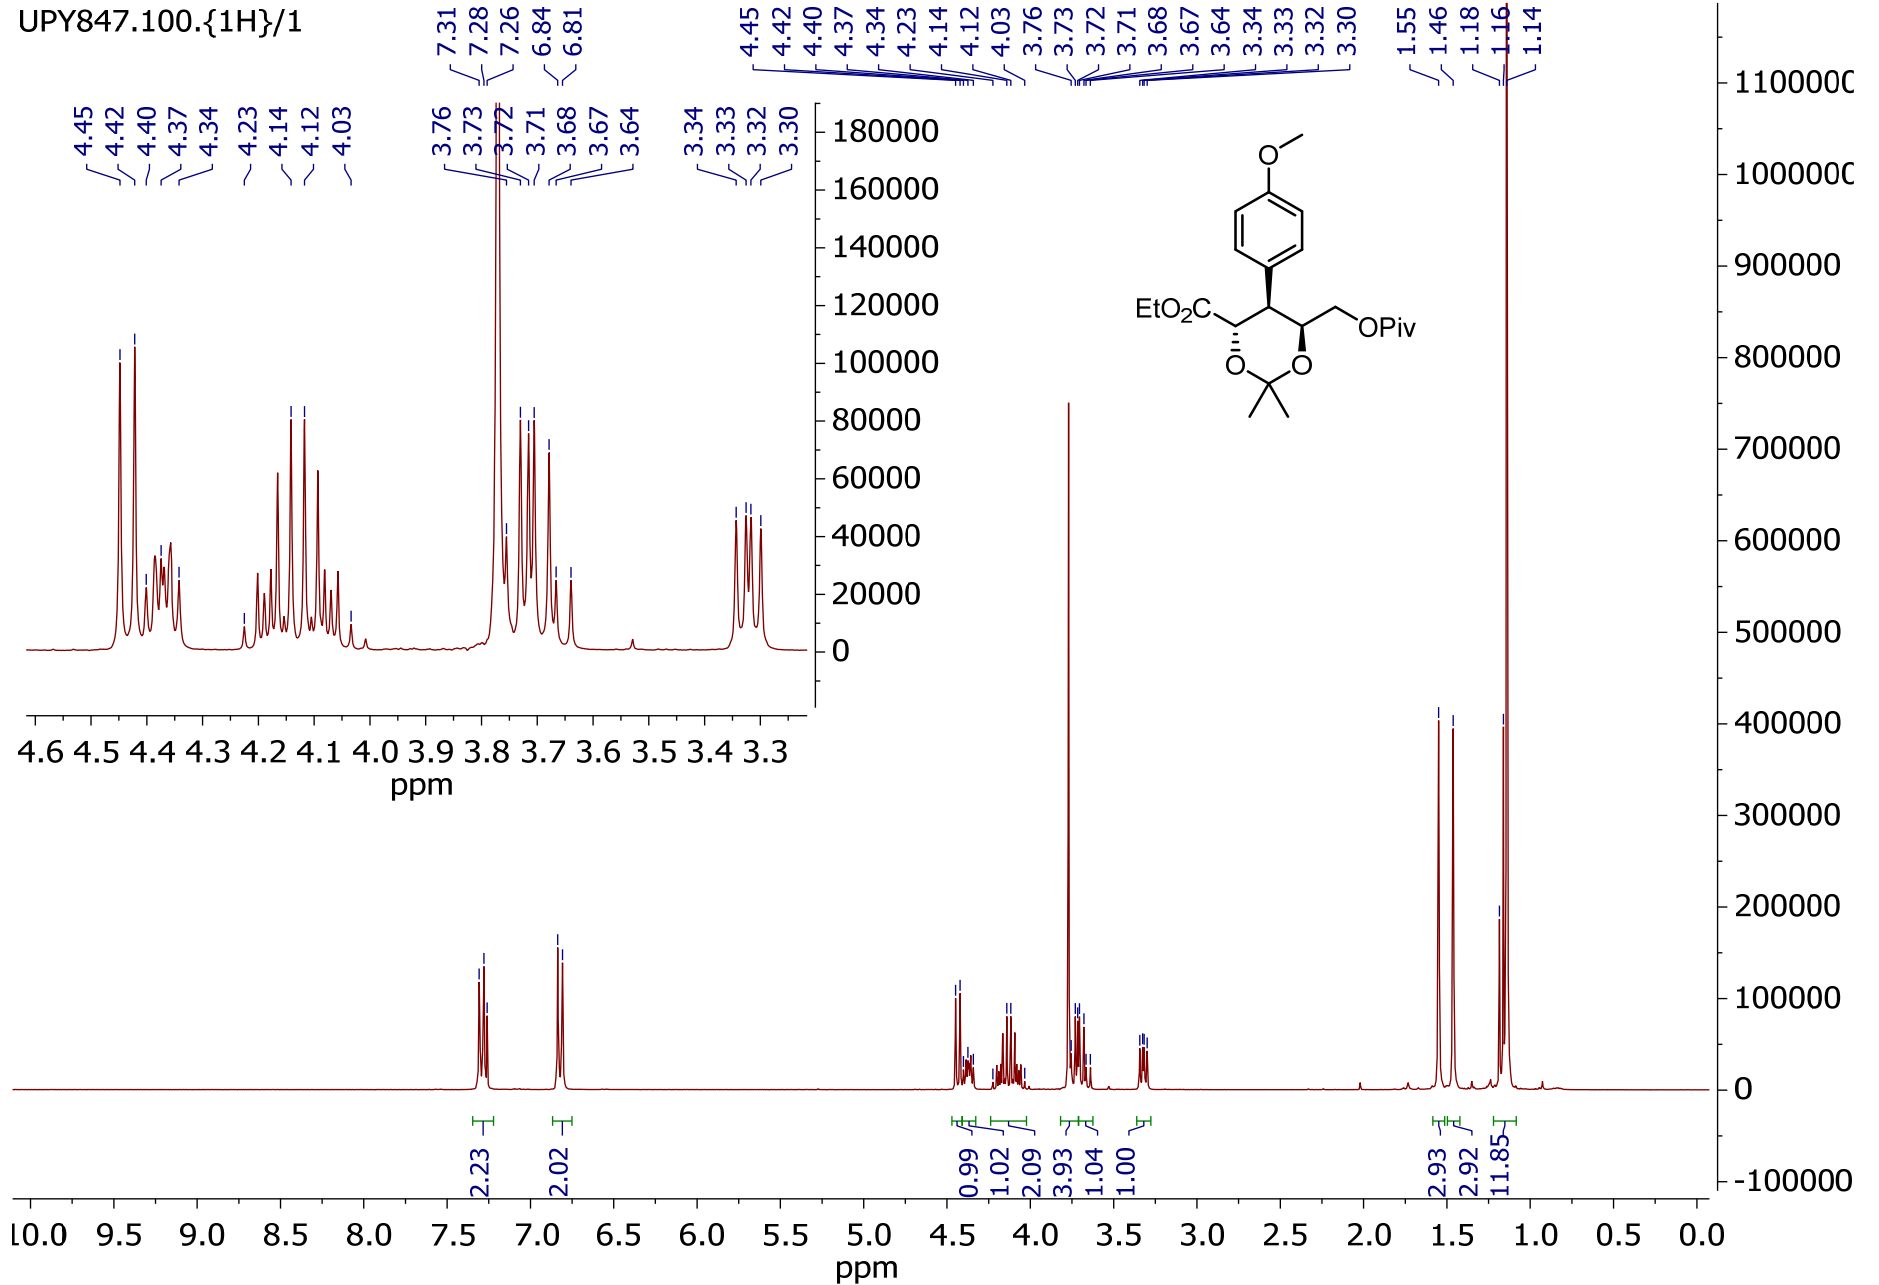

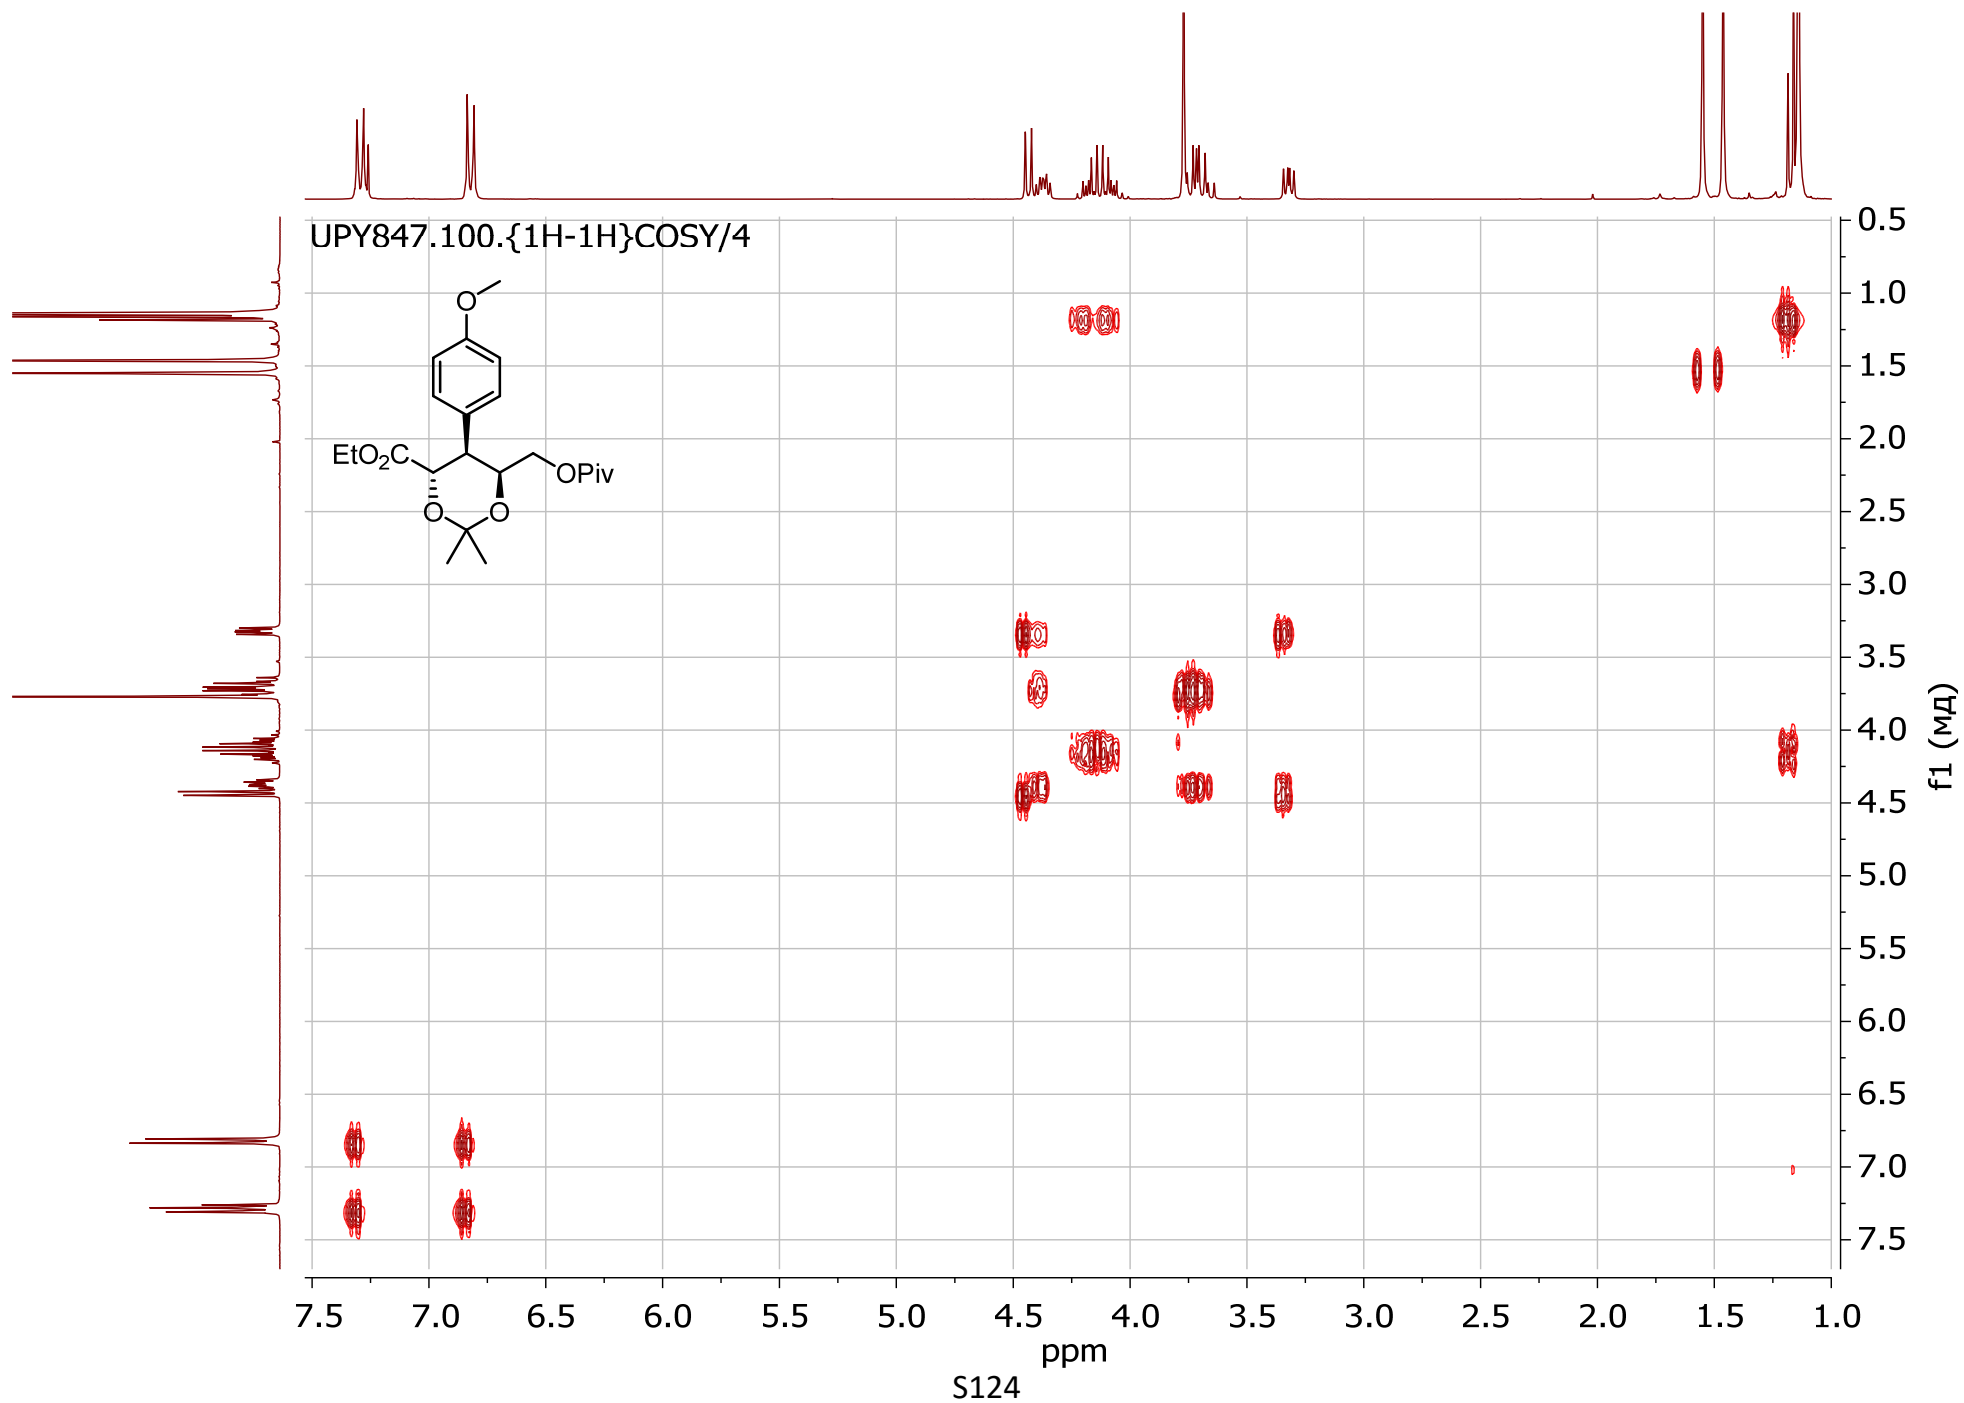

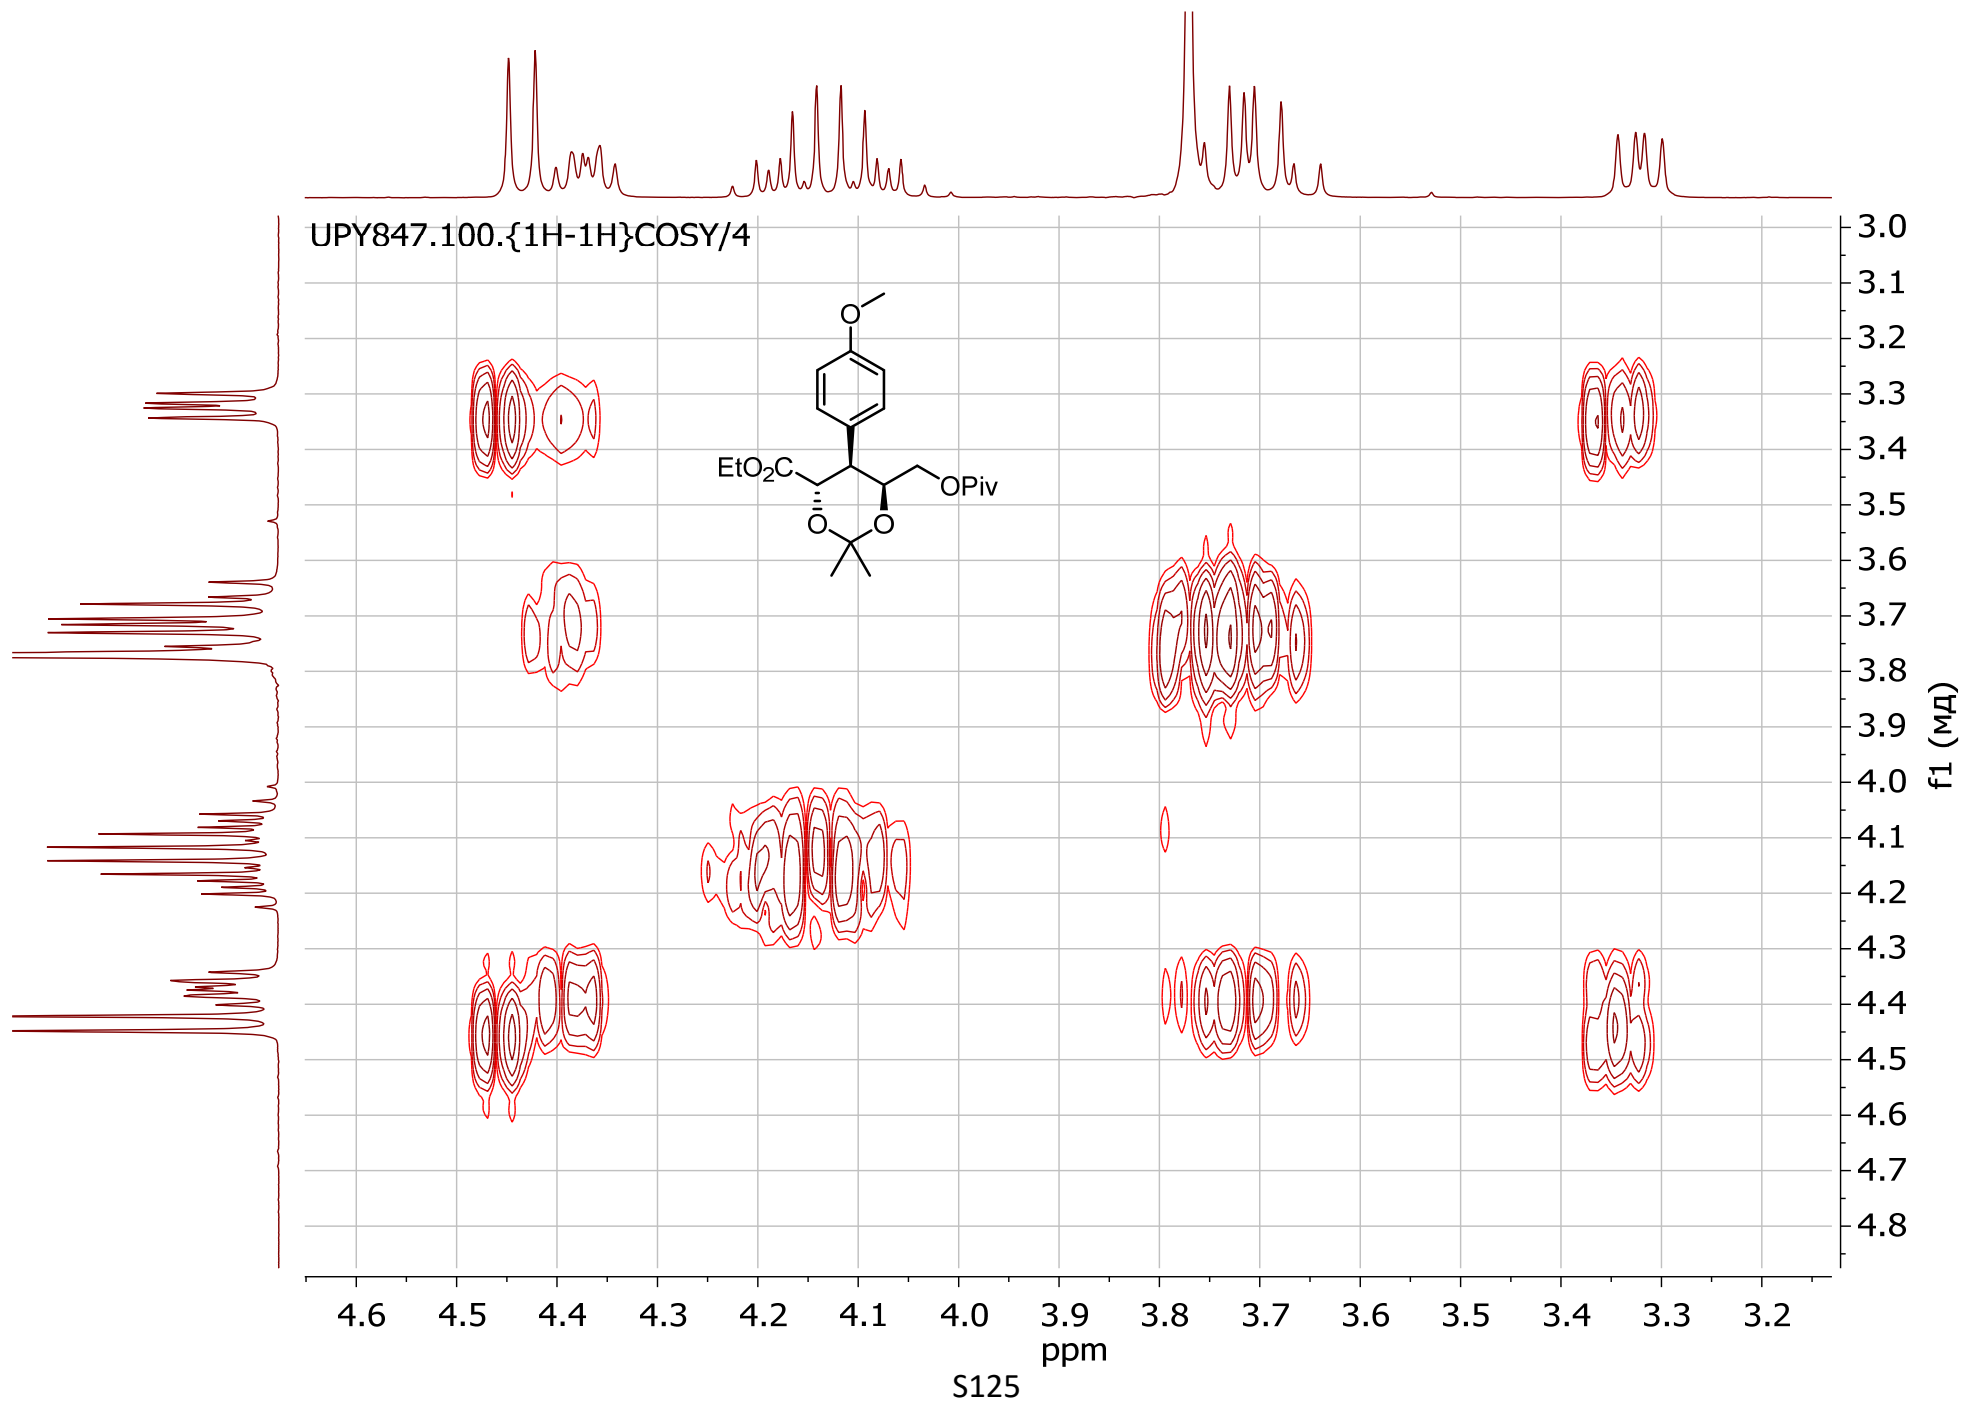

UPY847.100.{13C}/208

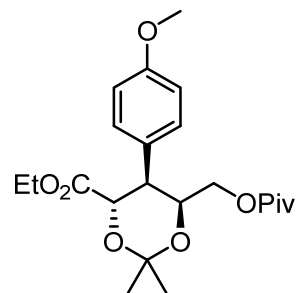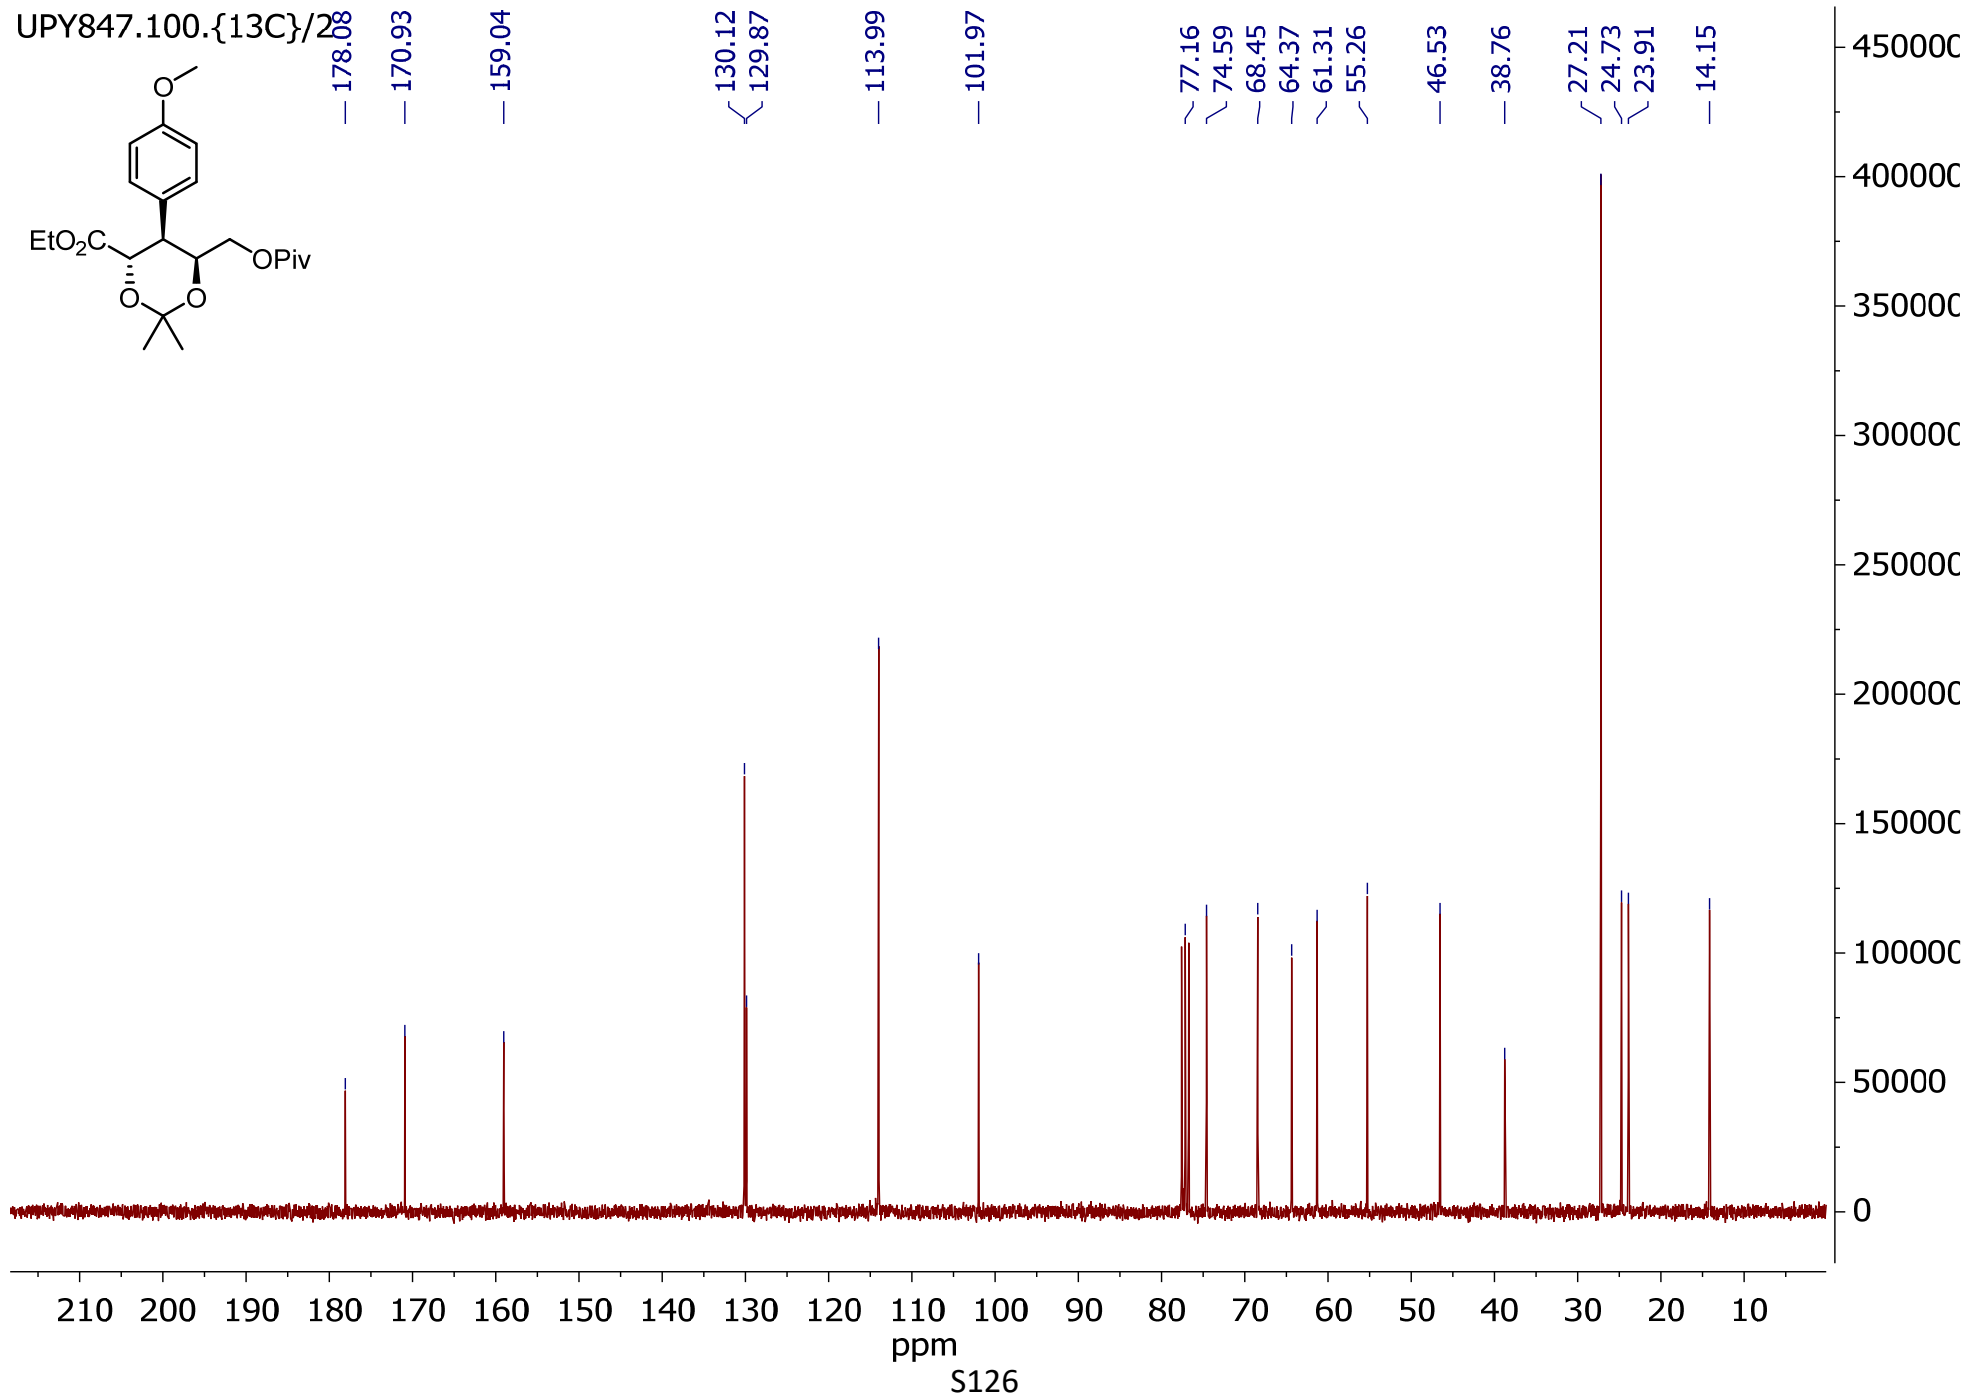

UPY847.100.{13C}deptsp135/3

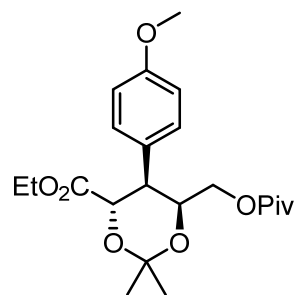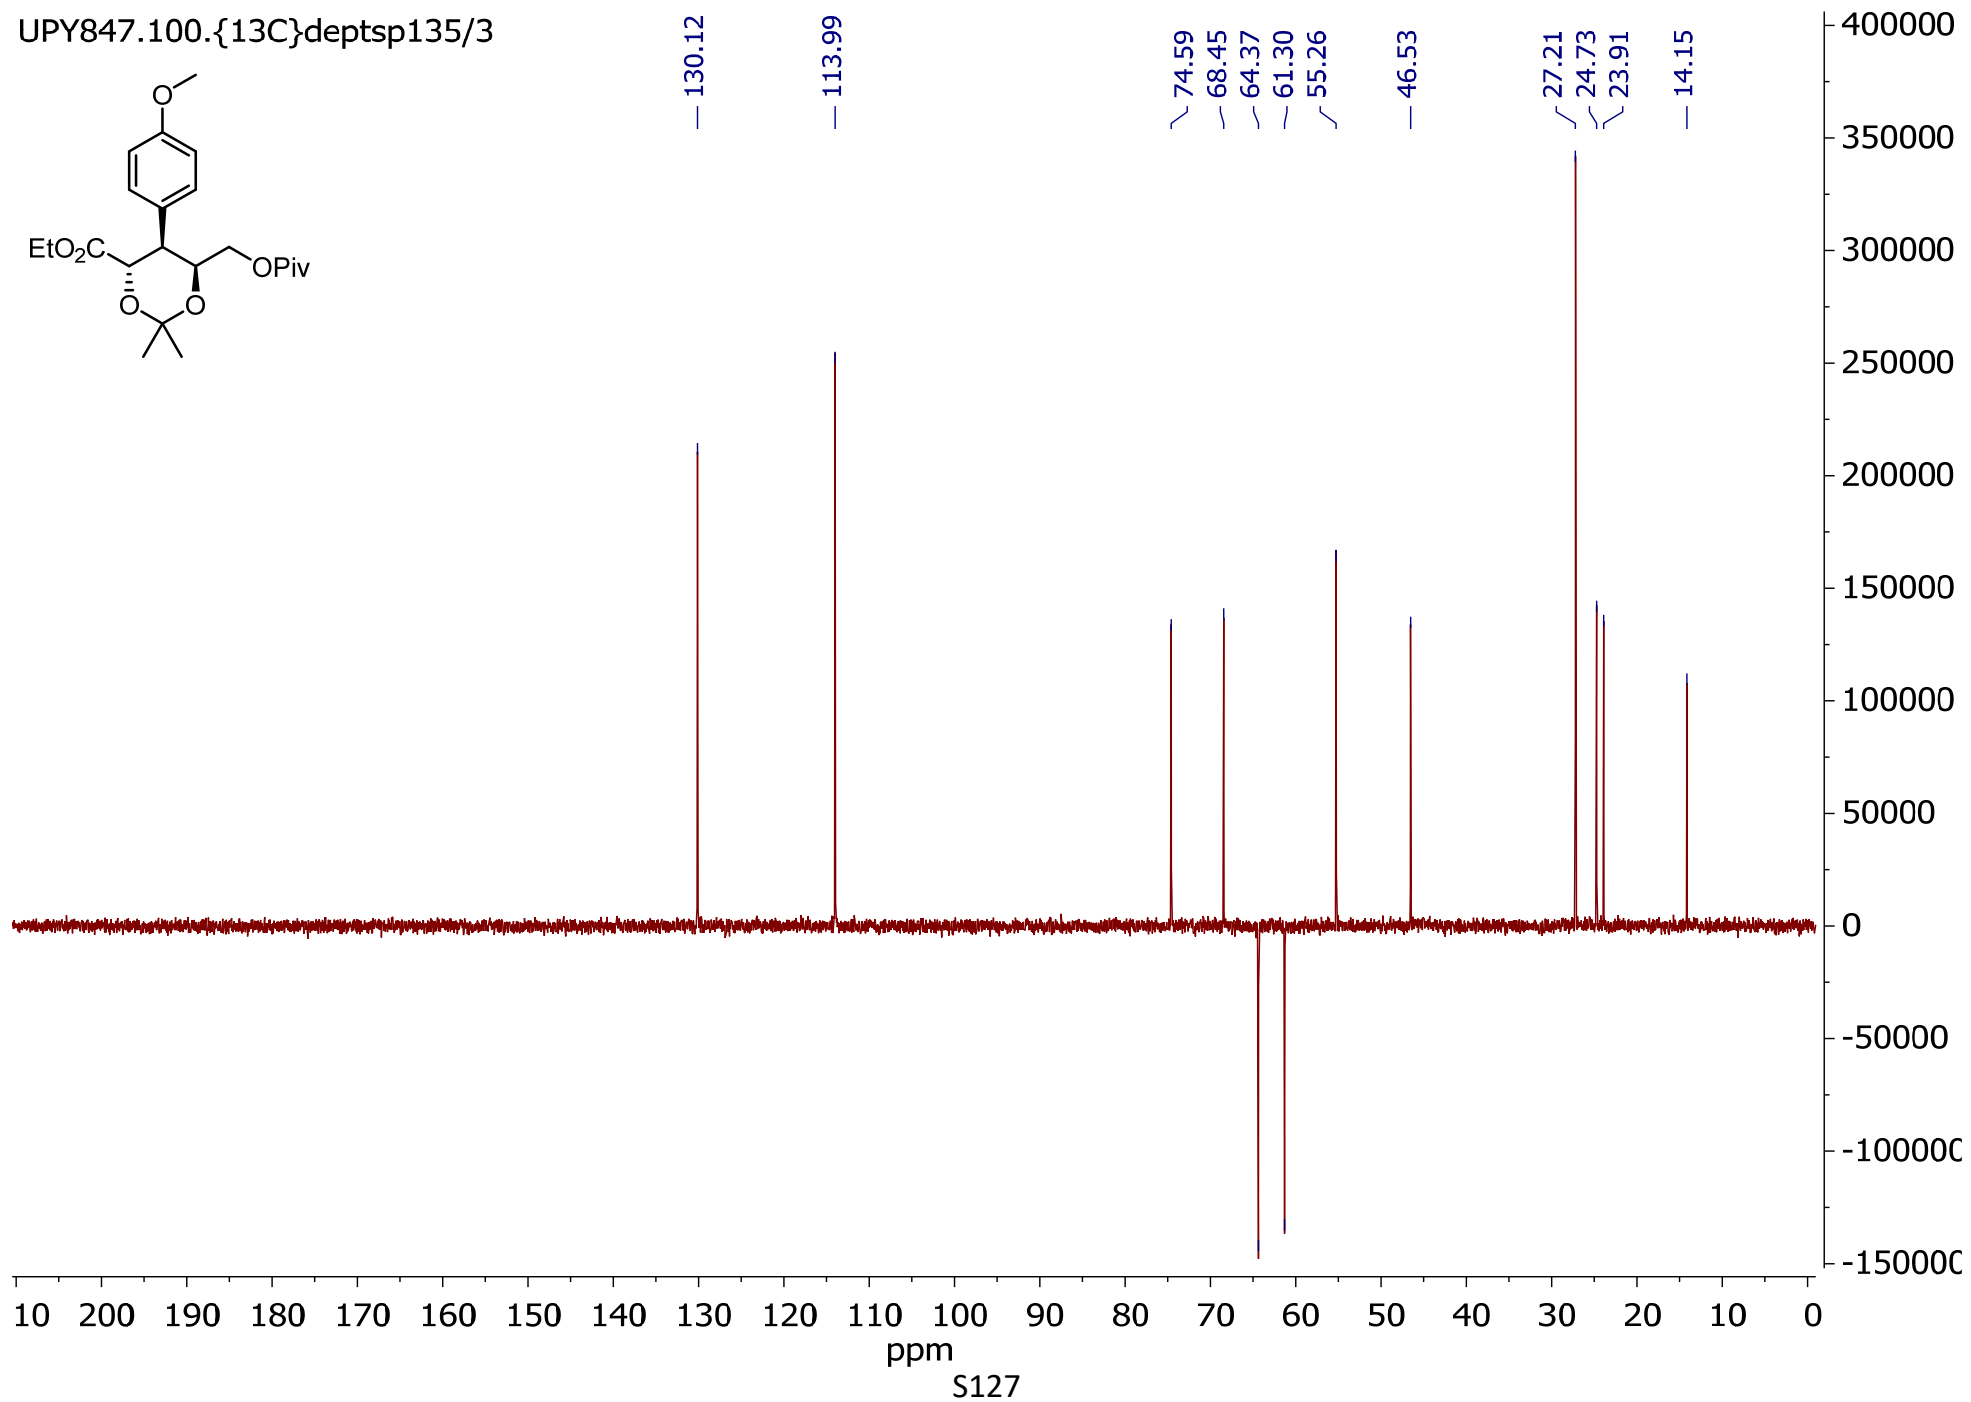

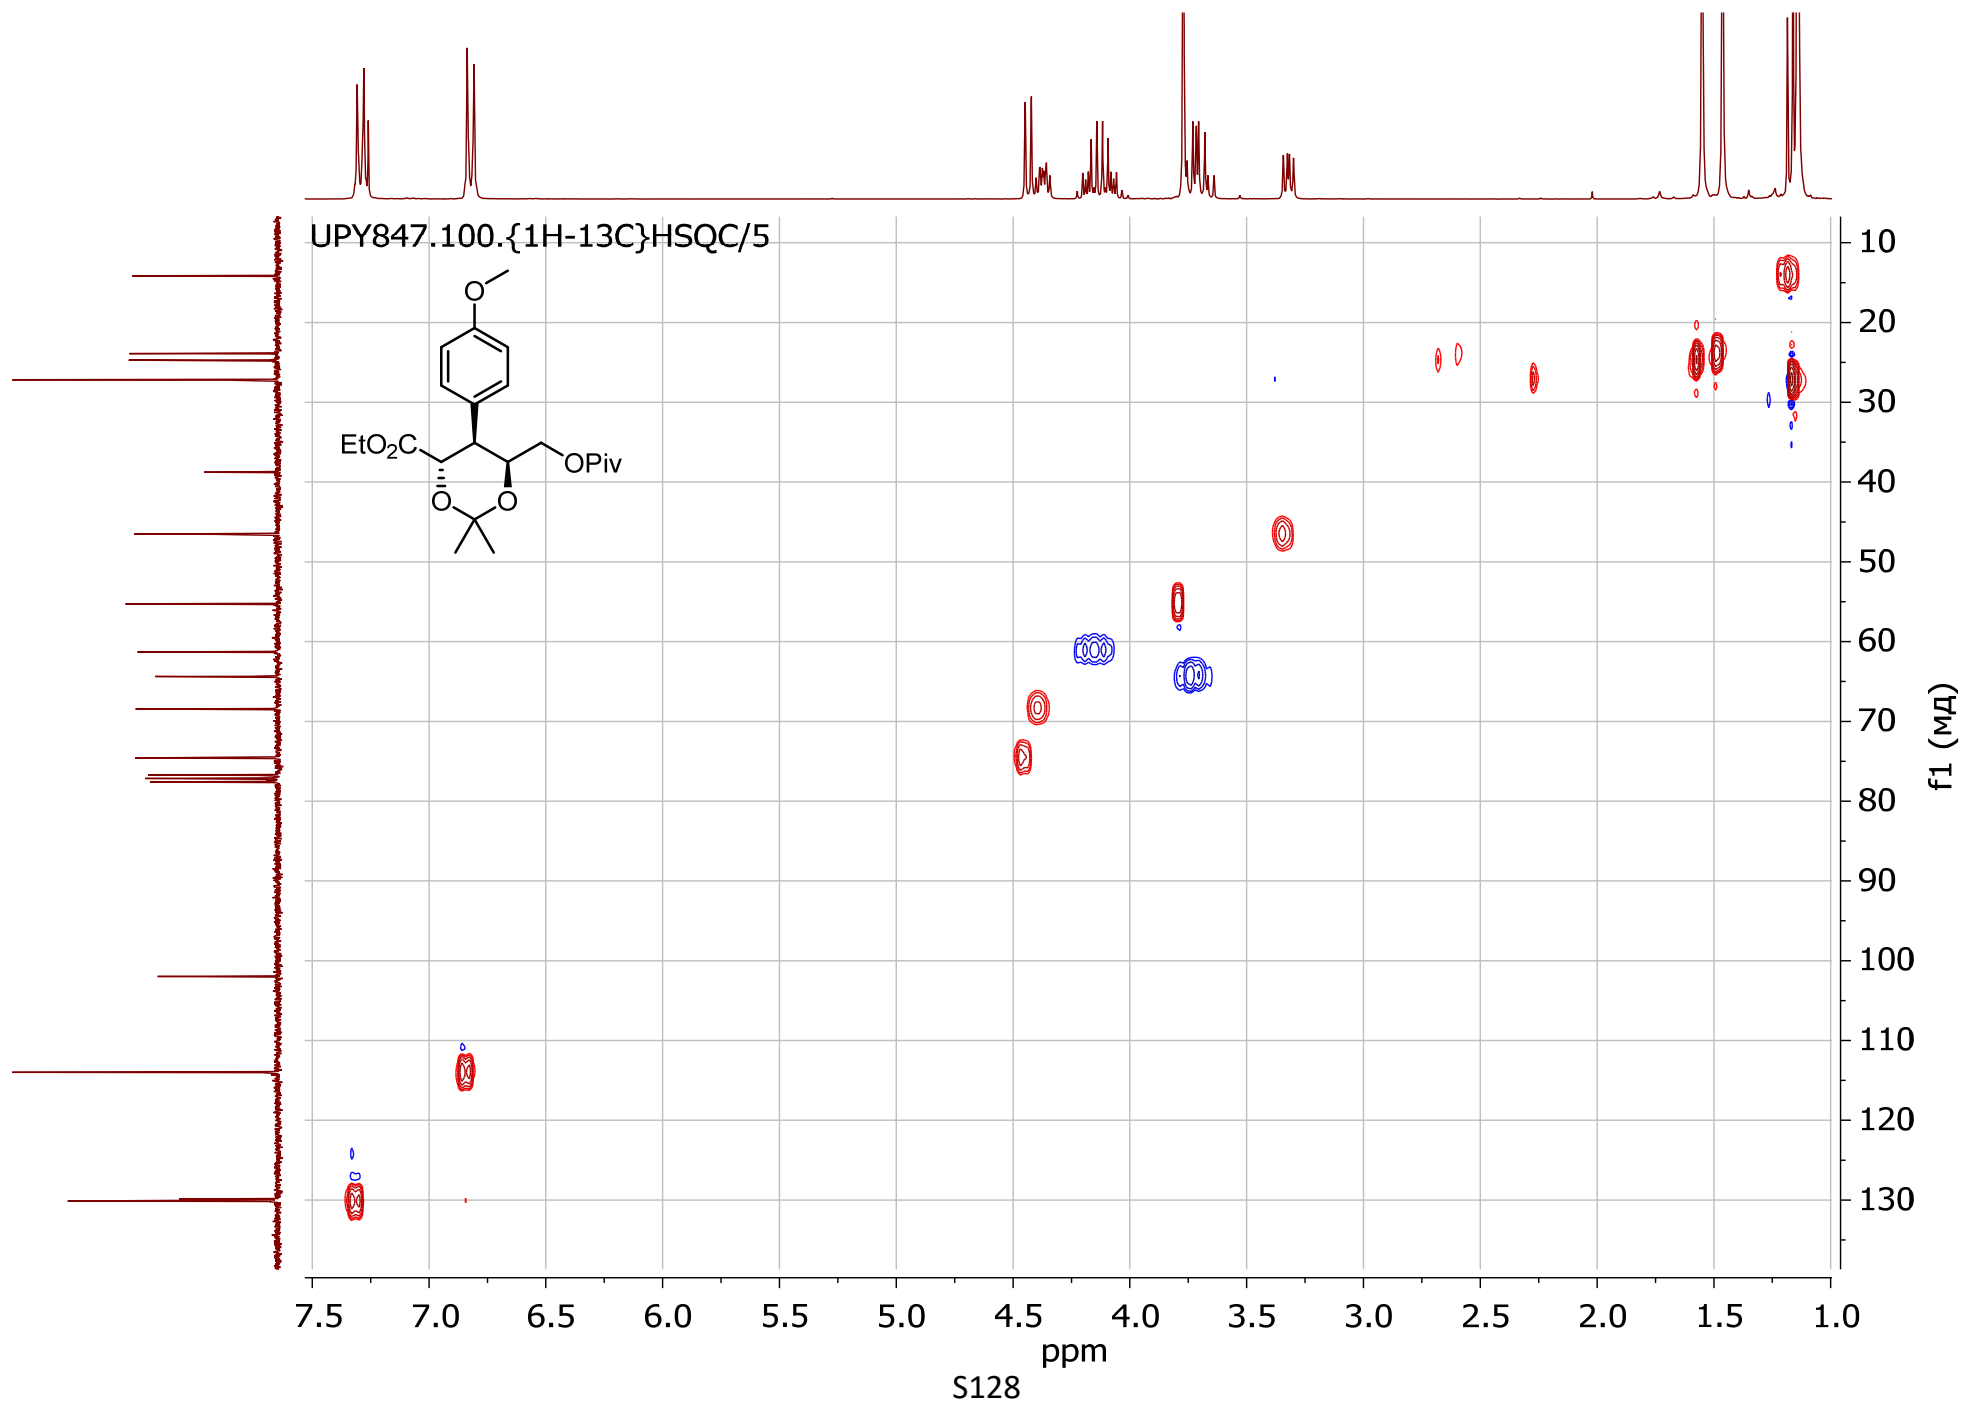



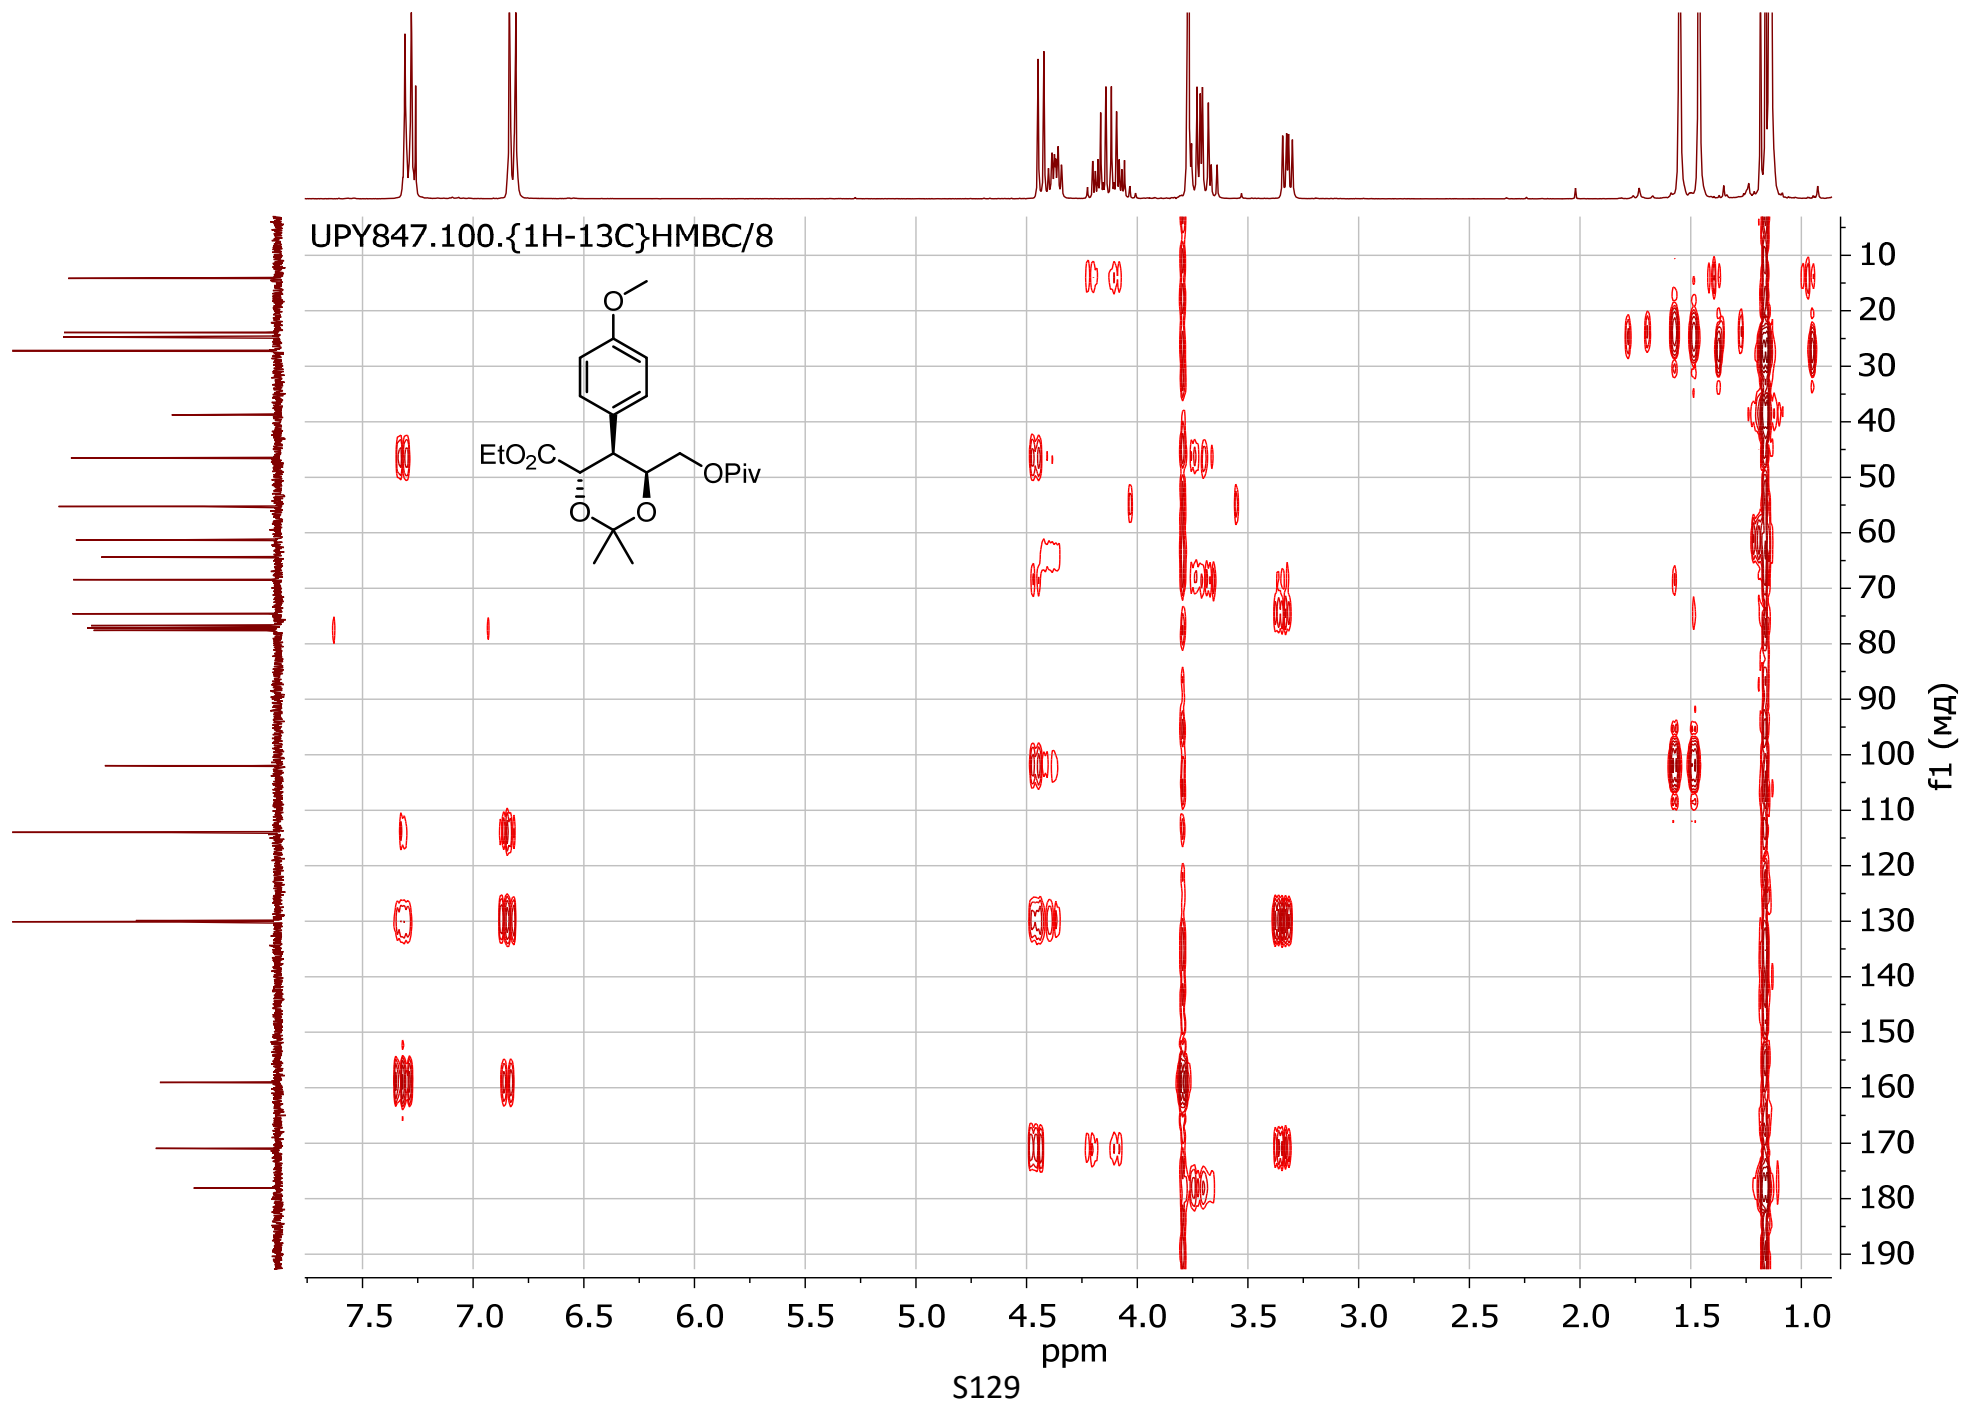

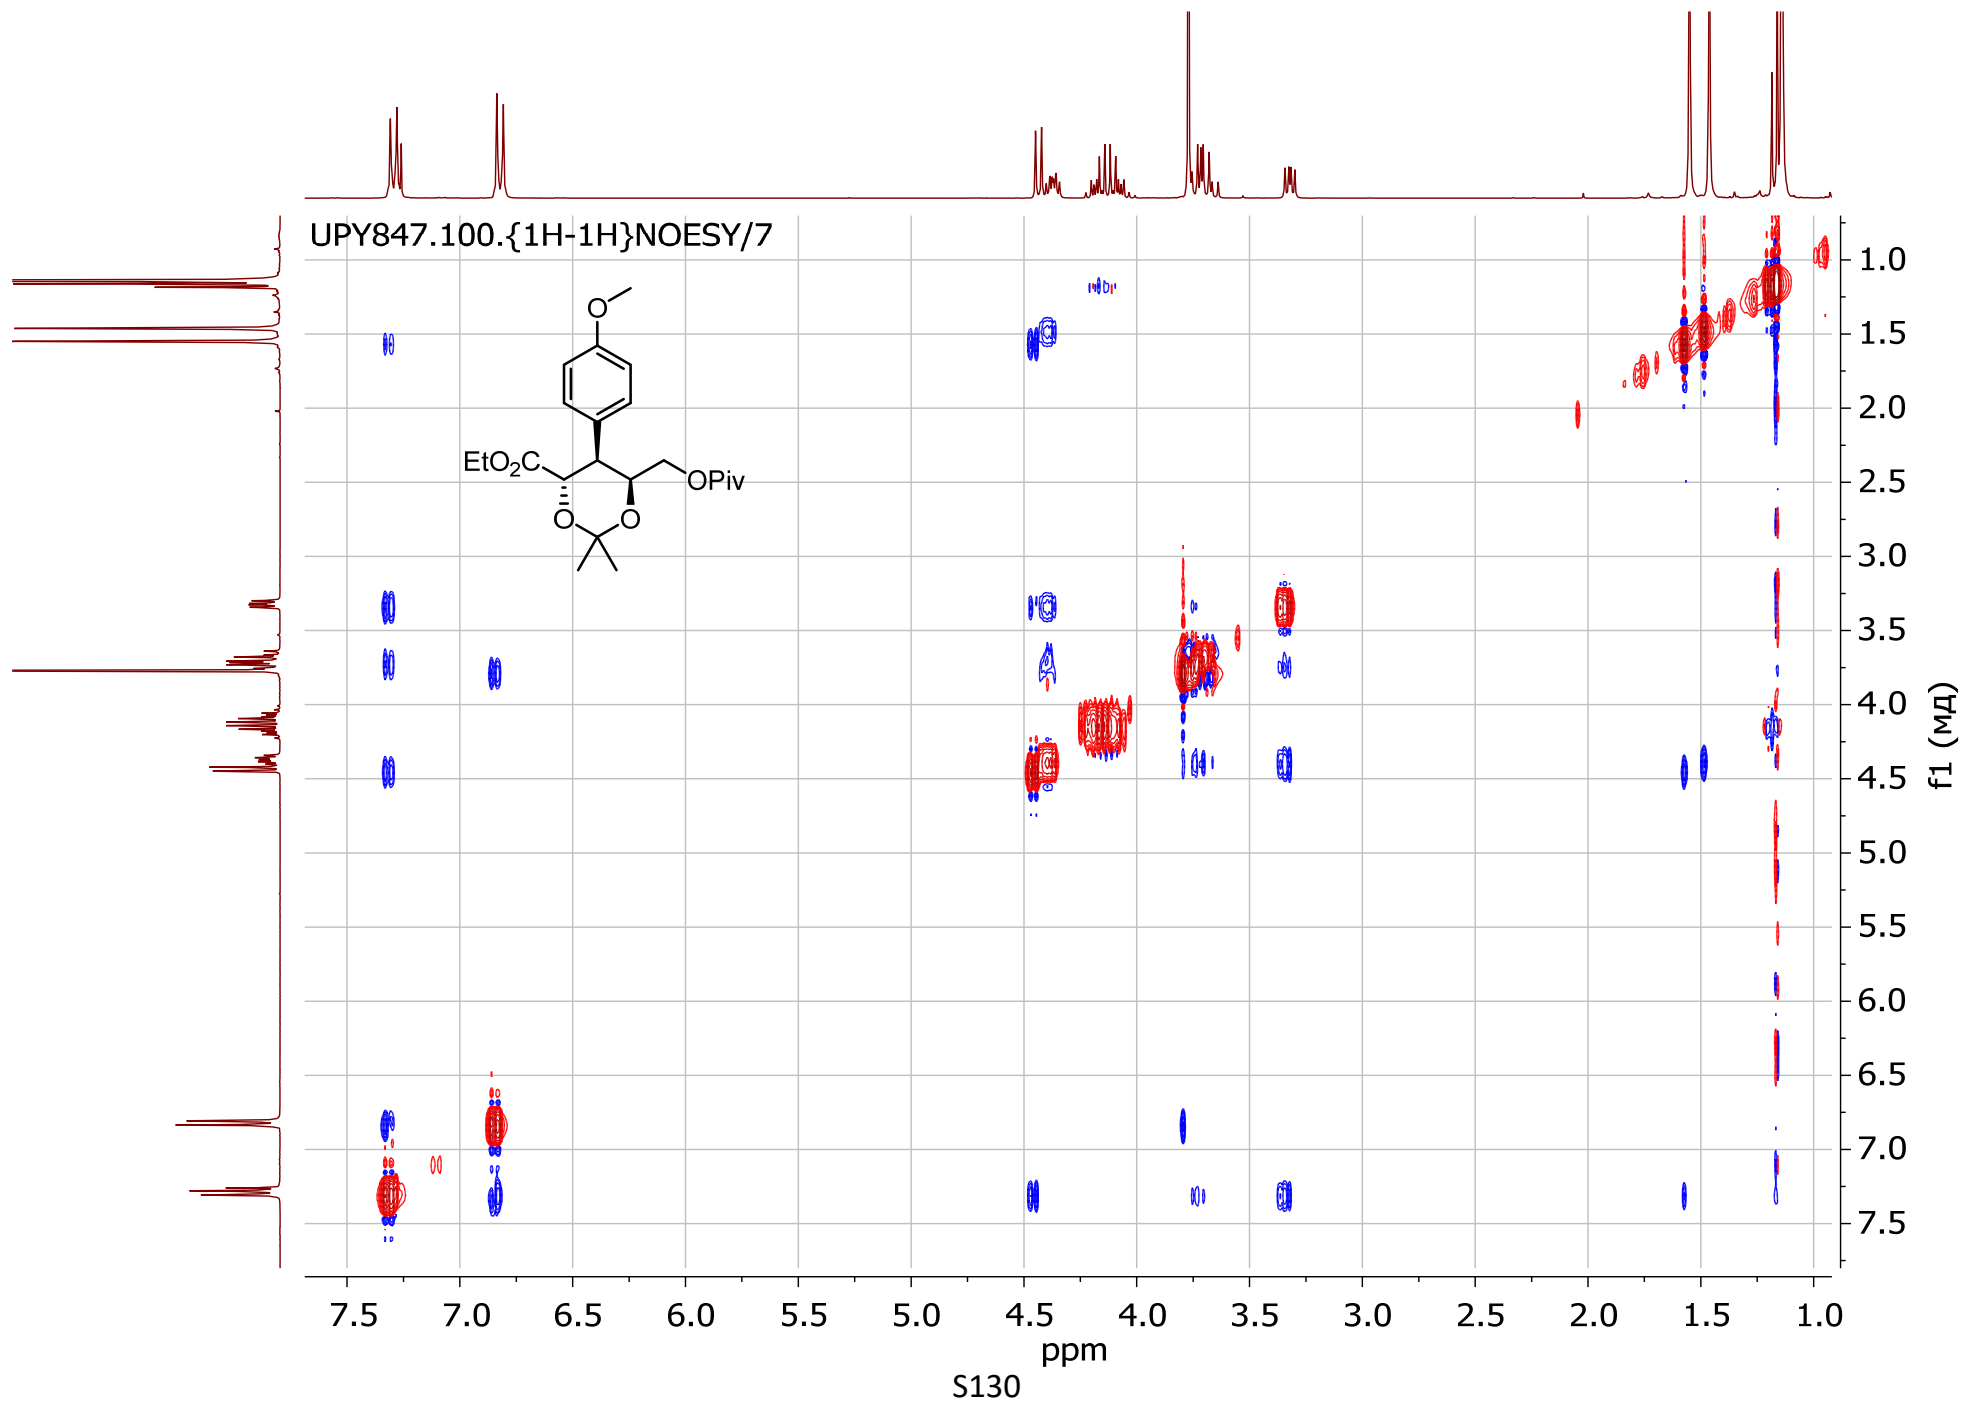

UPY847.100.{1H-1H}NOESY/7

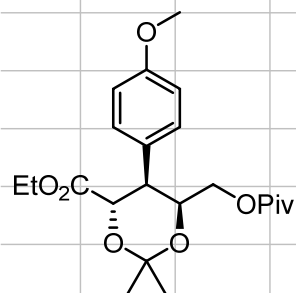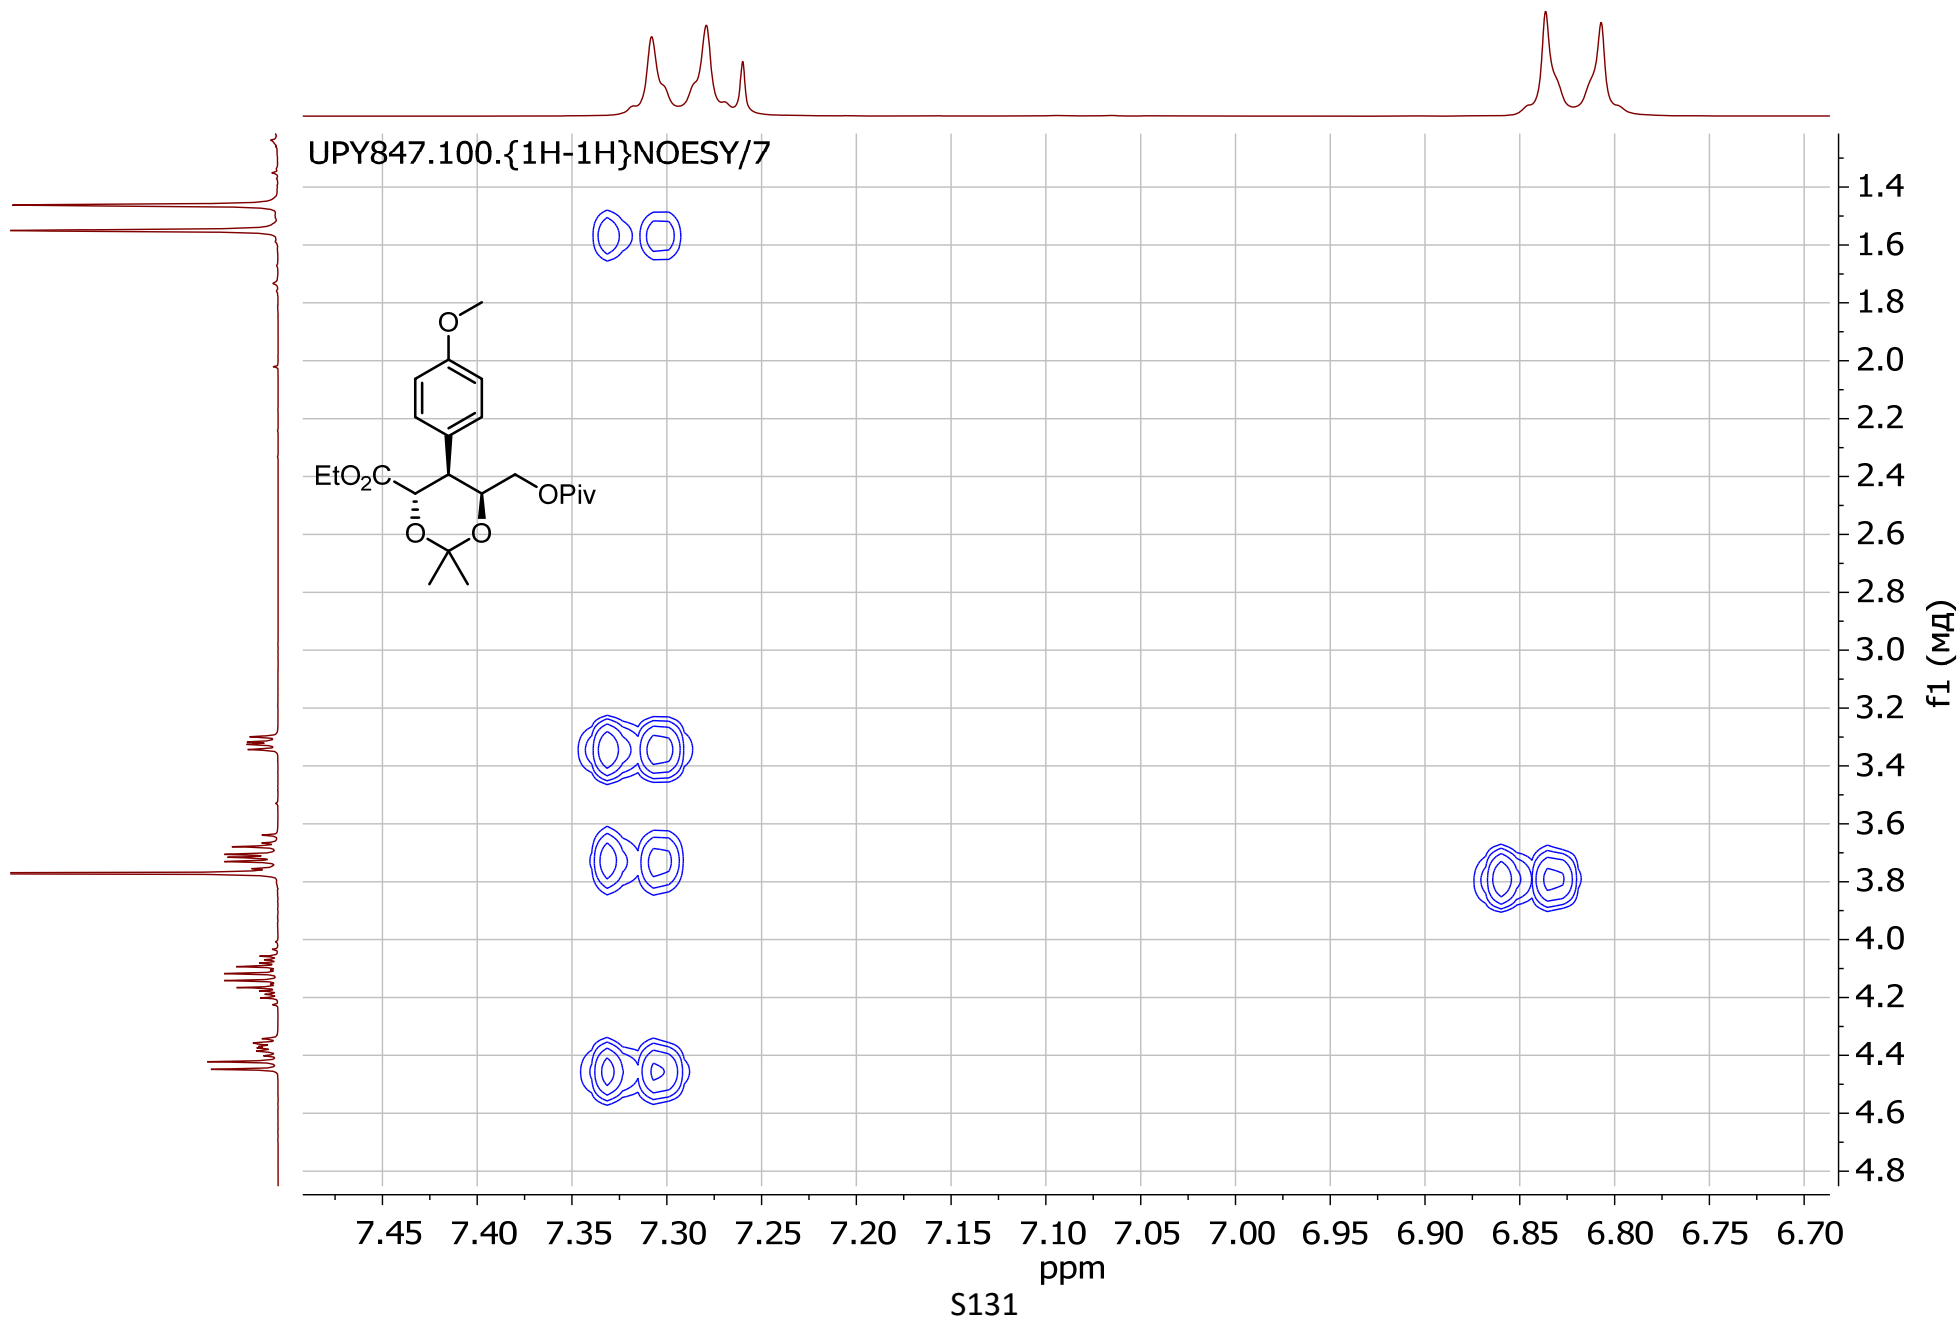

S131

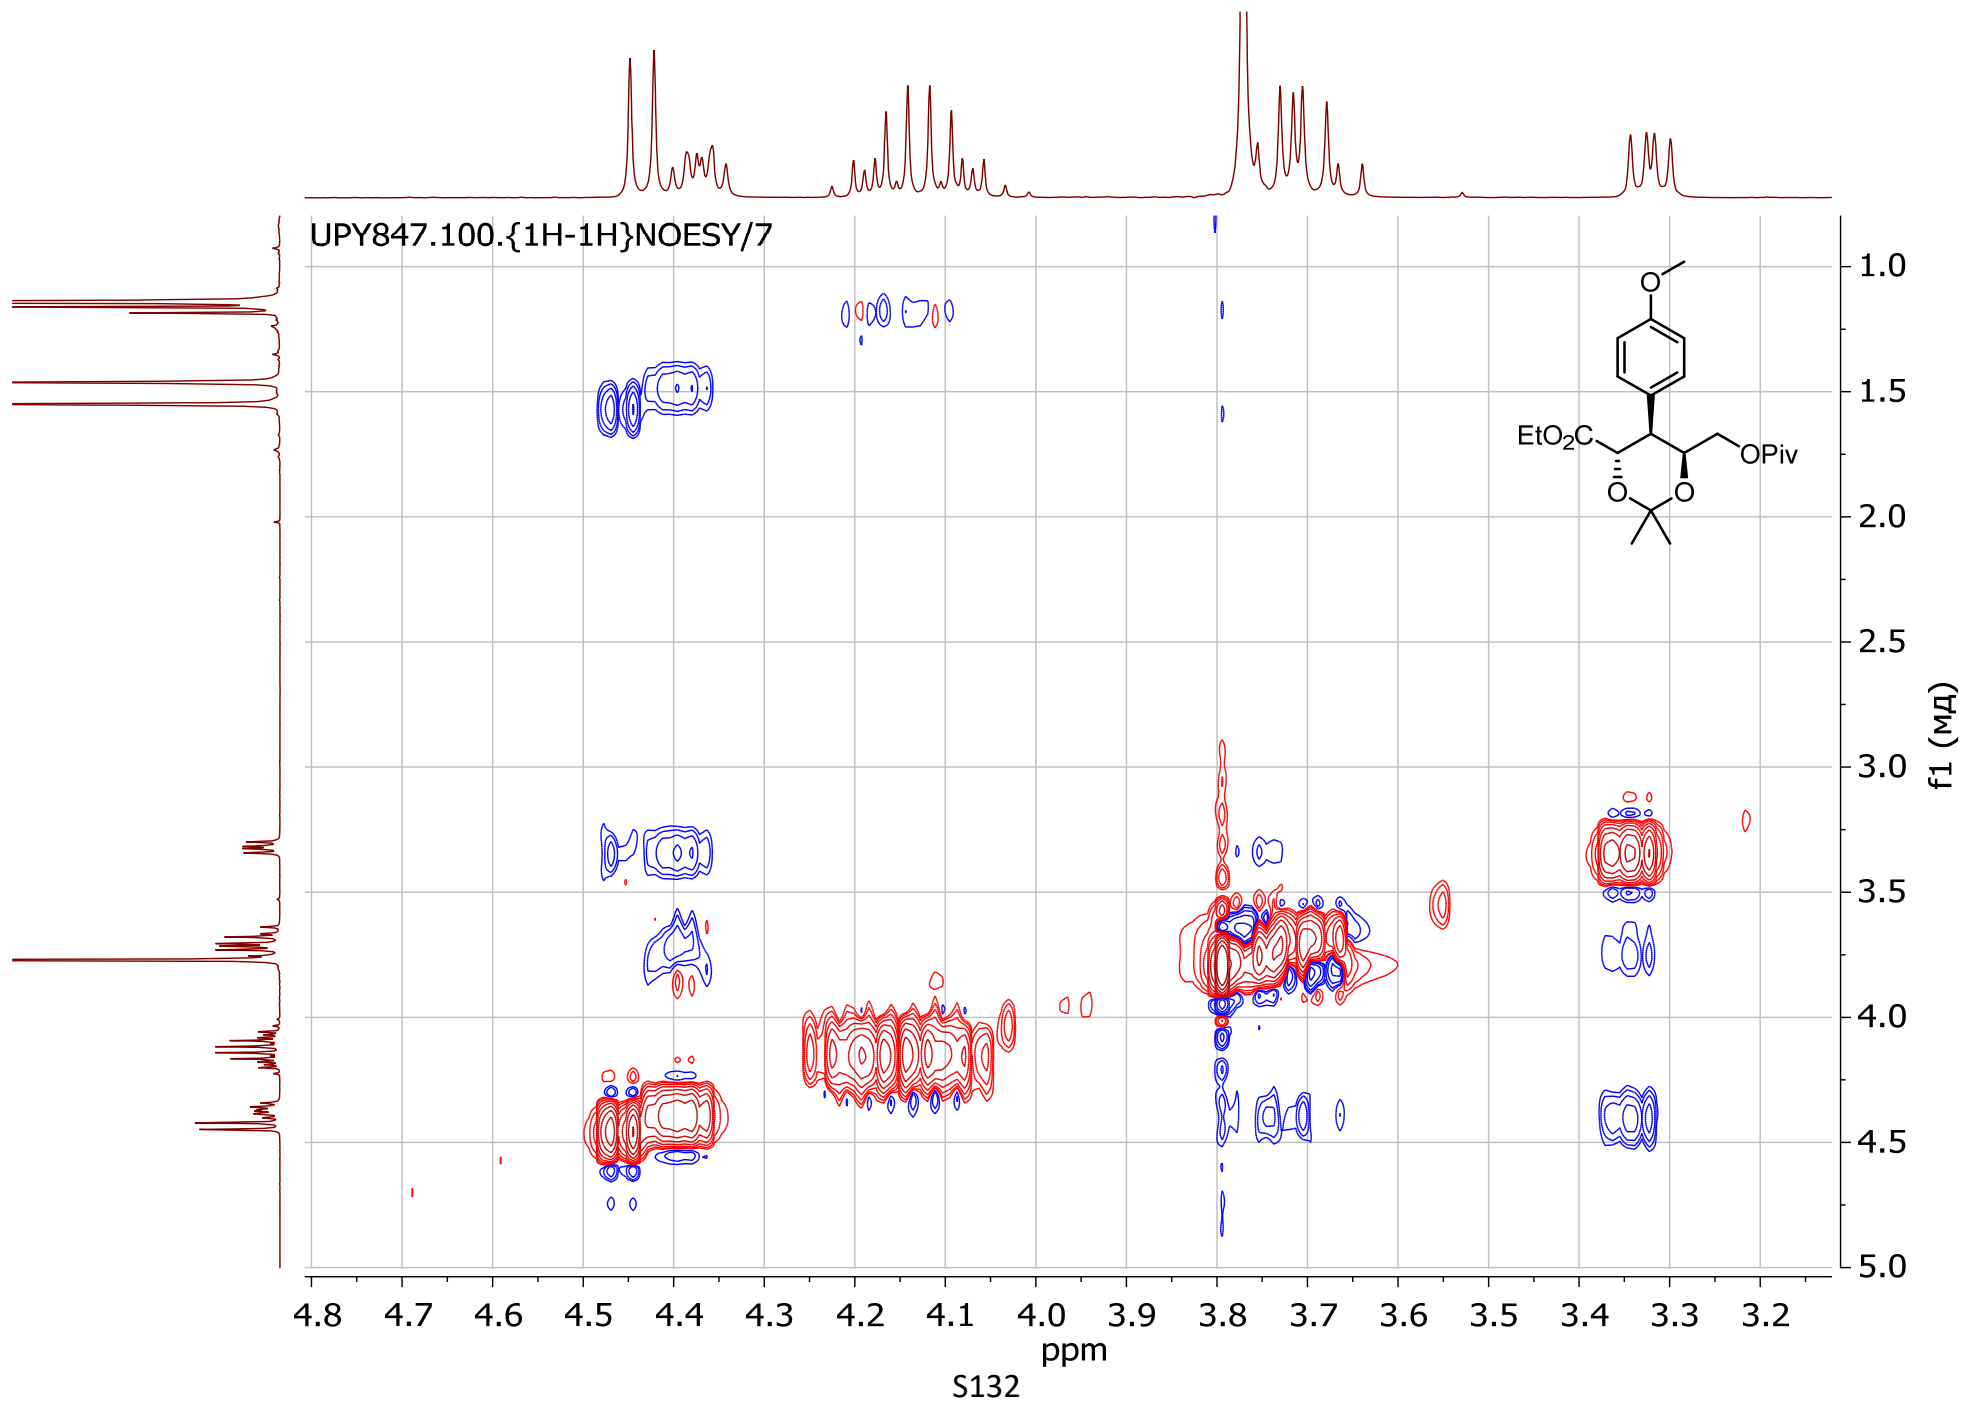

UPY848.100.{1H}/1

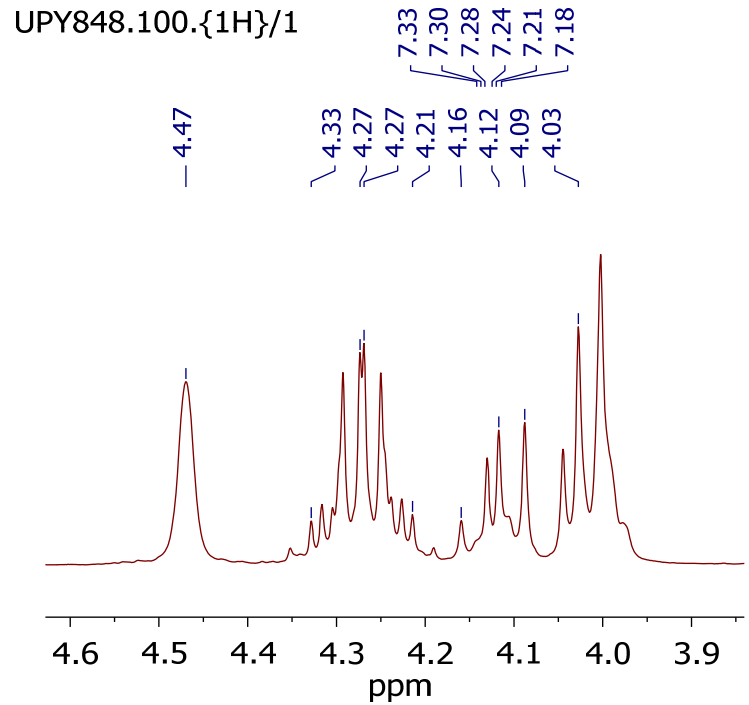

### NMR spectra of 18a

4.47  
4.33  
4.27  
4.27  
4.21  
4.16  
4.12  
4.09  
4.03  
3.64  
3.14  
2.93  
2.88  
2.83  
2.69  
2.67  
2.62  
2.60  
2.12  
2.10  
2.02  
1.93  
1.88  
1.81  
1.34  
1.31  
1.29  
1.18

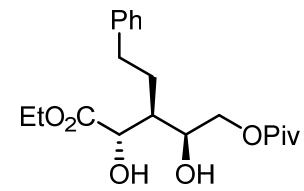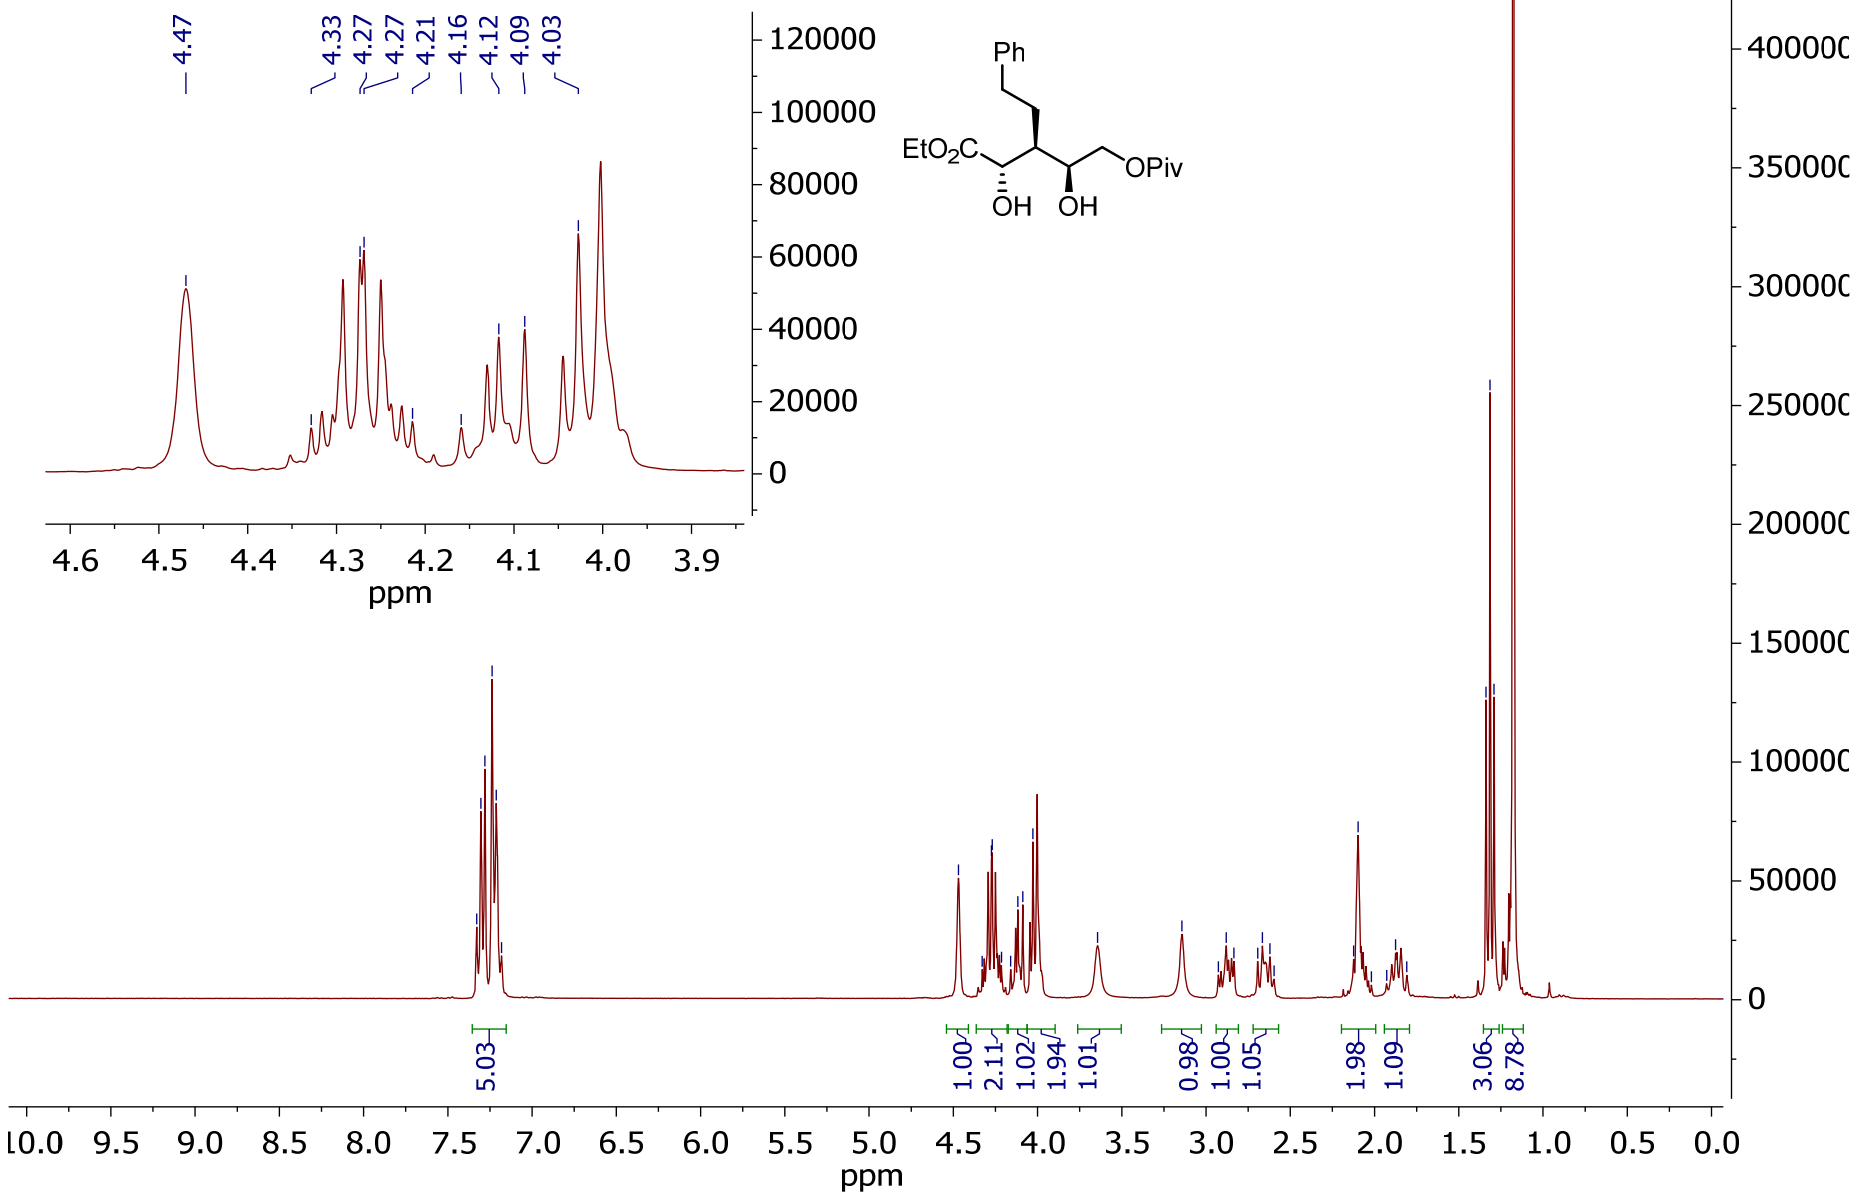

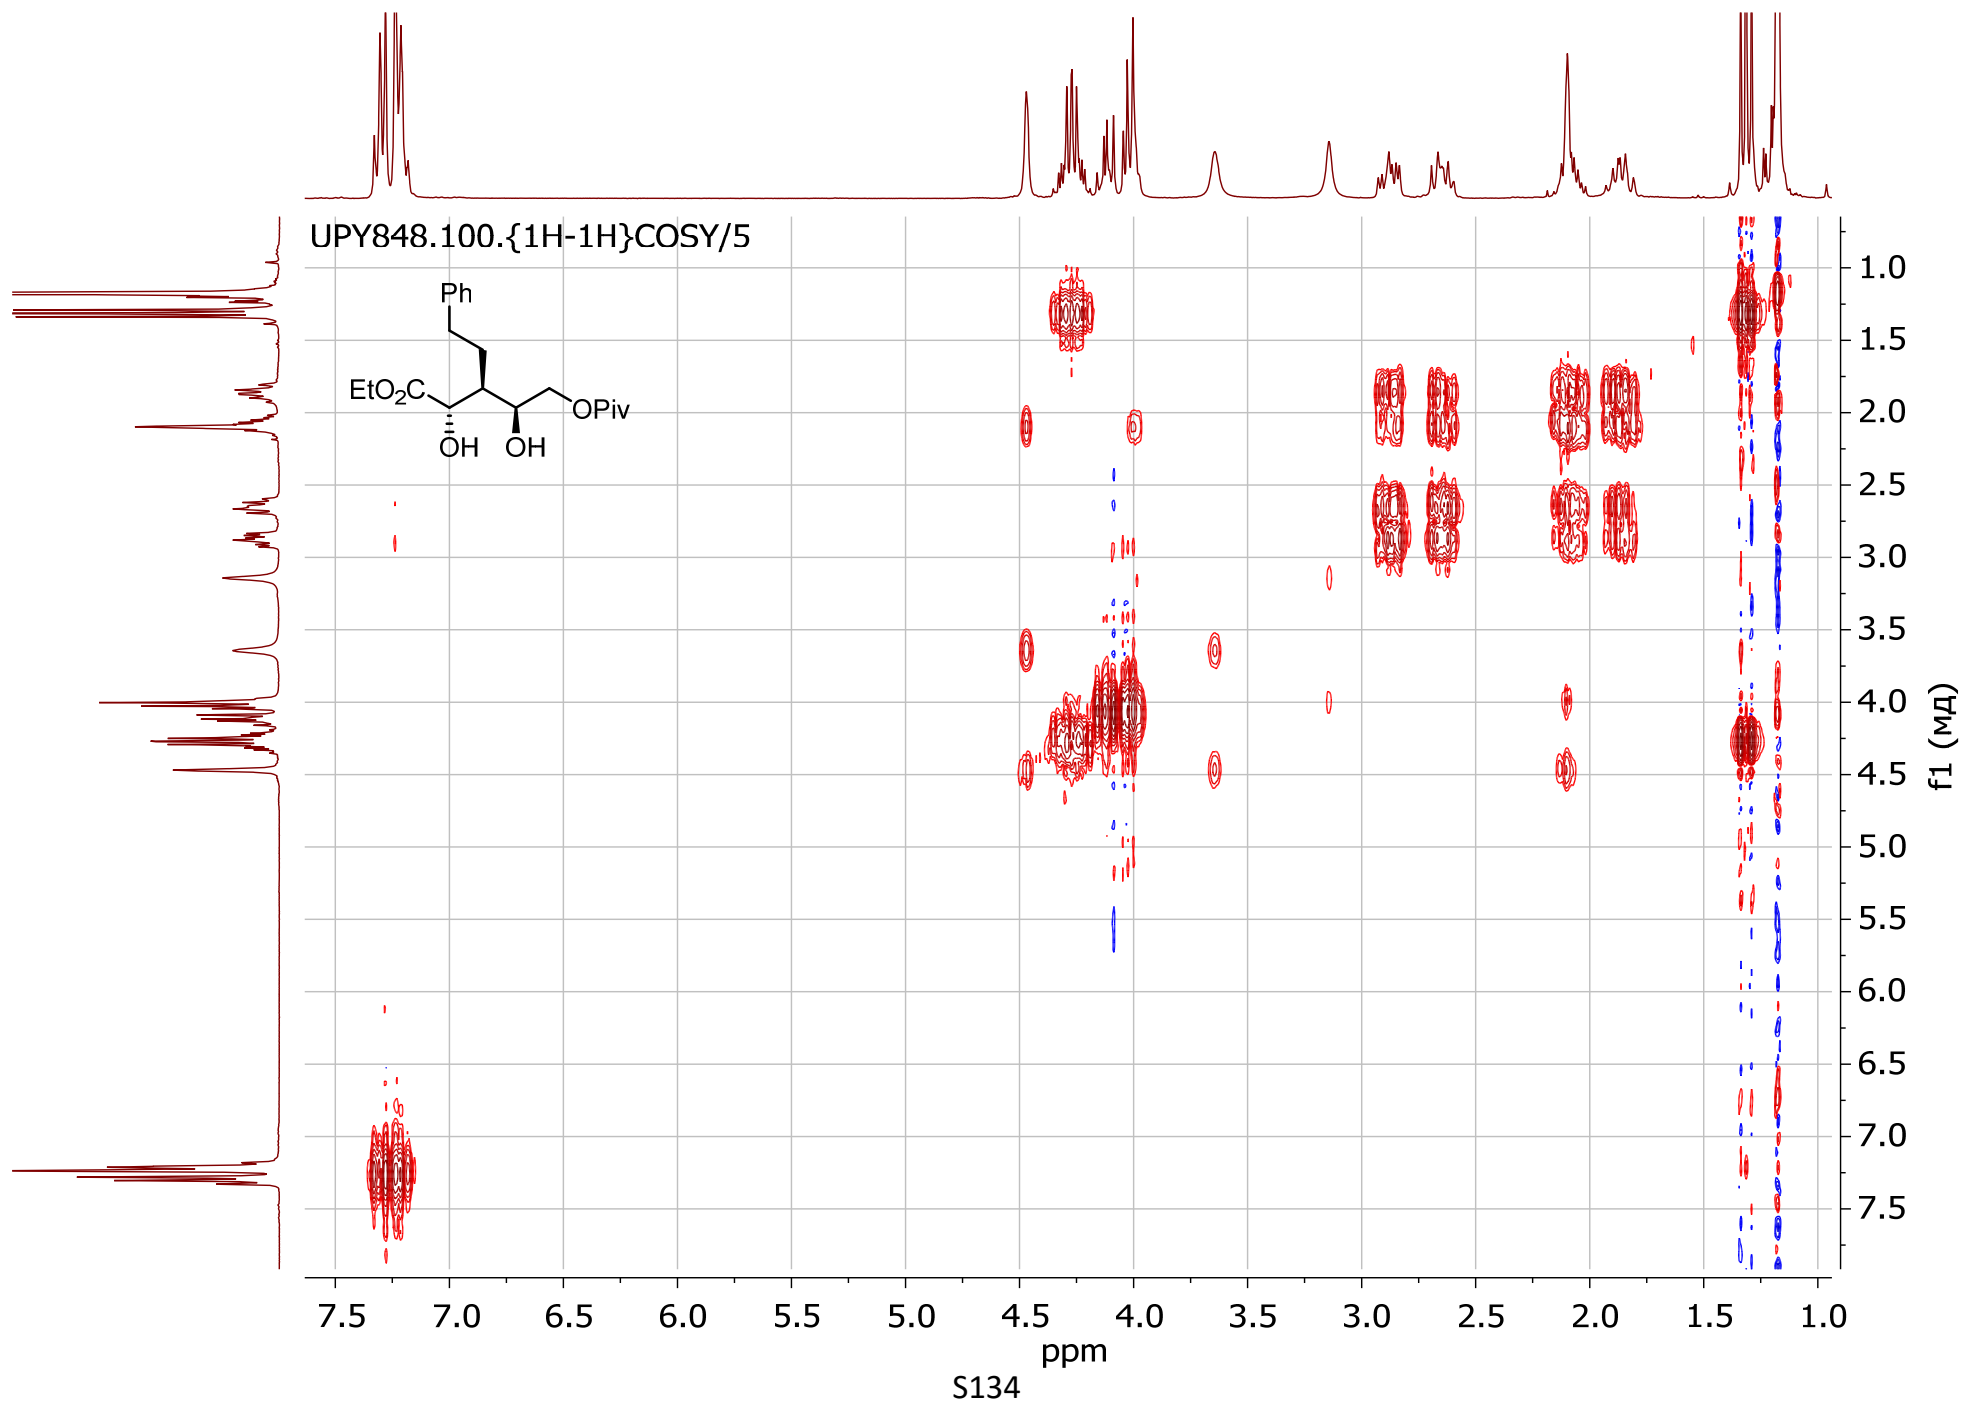

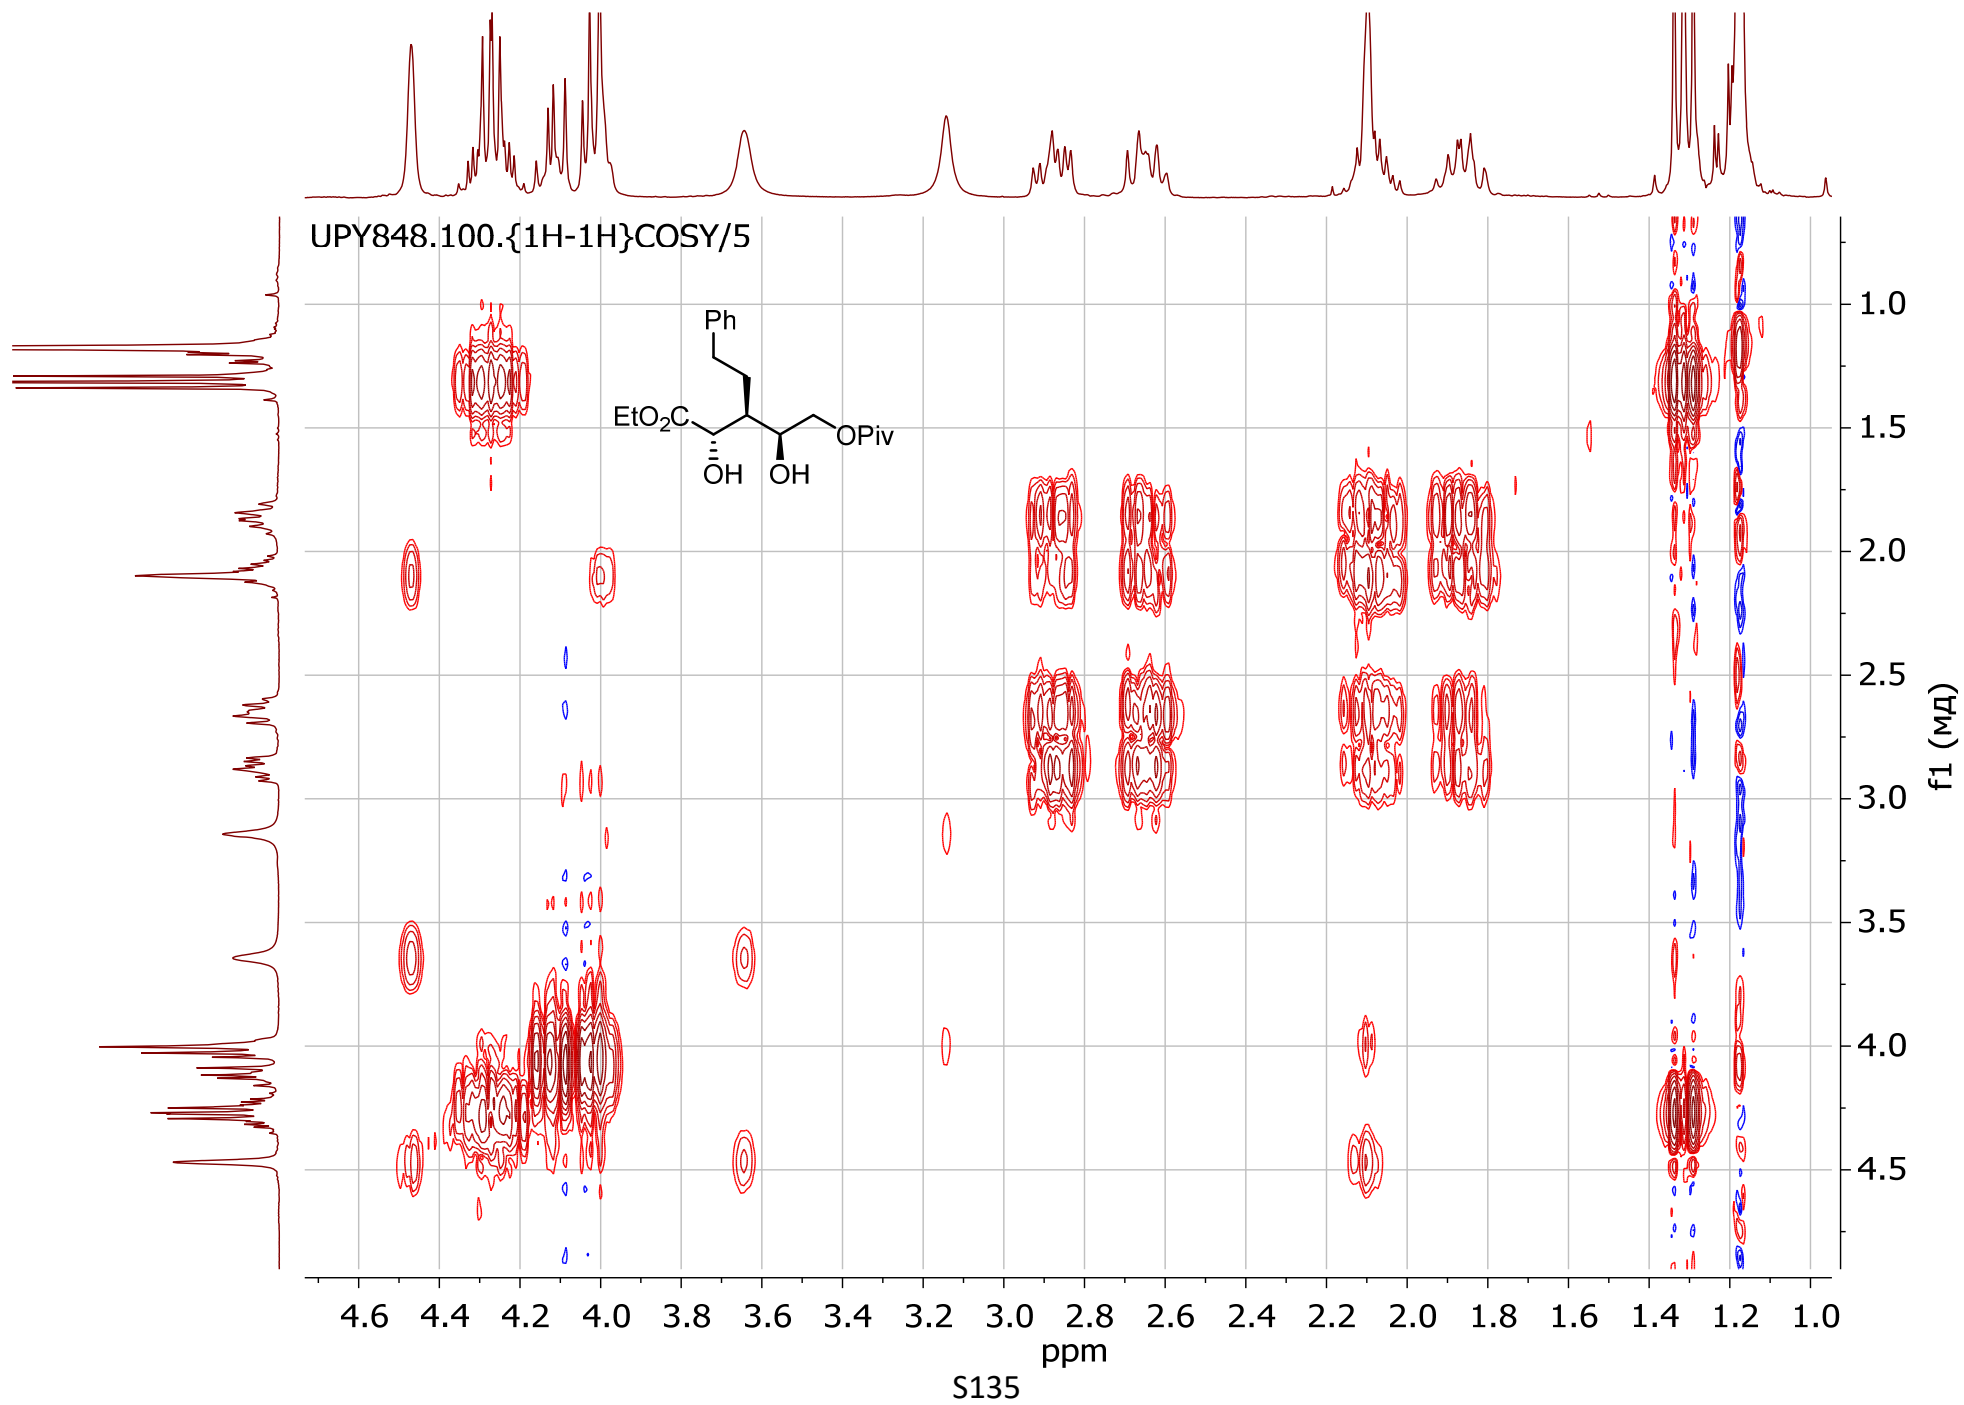

UPY848.100.{13C}/2

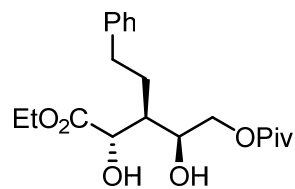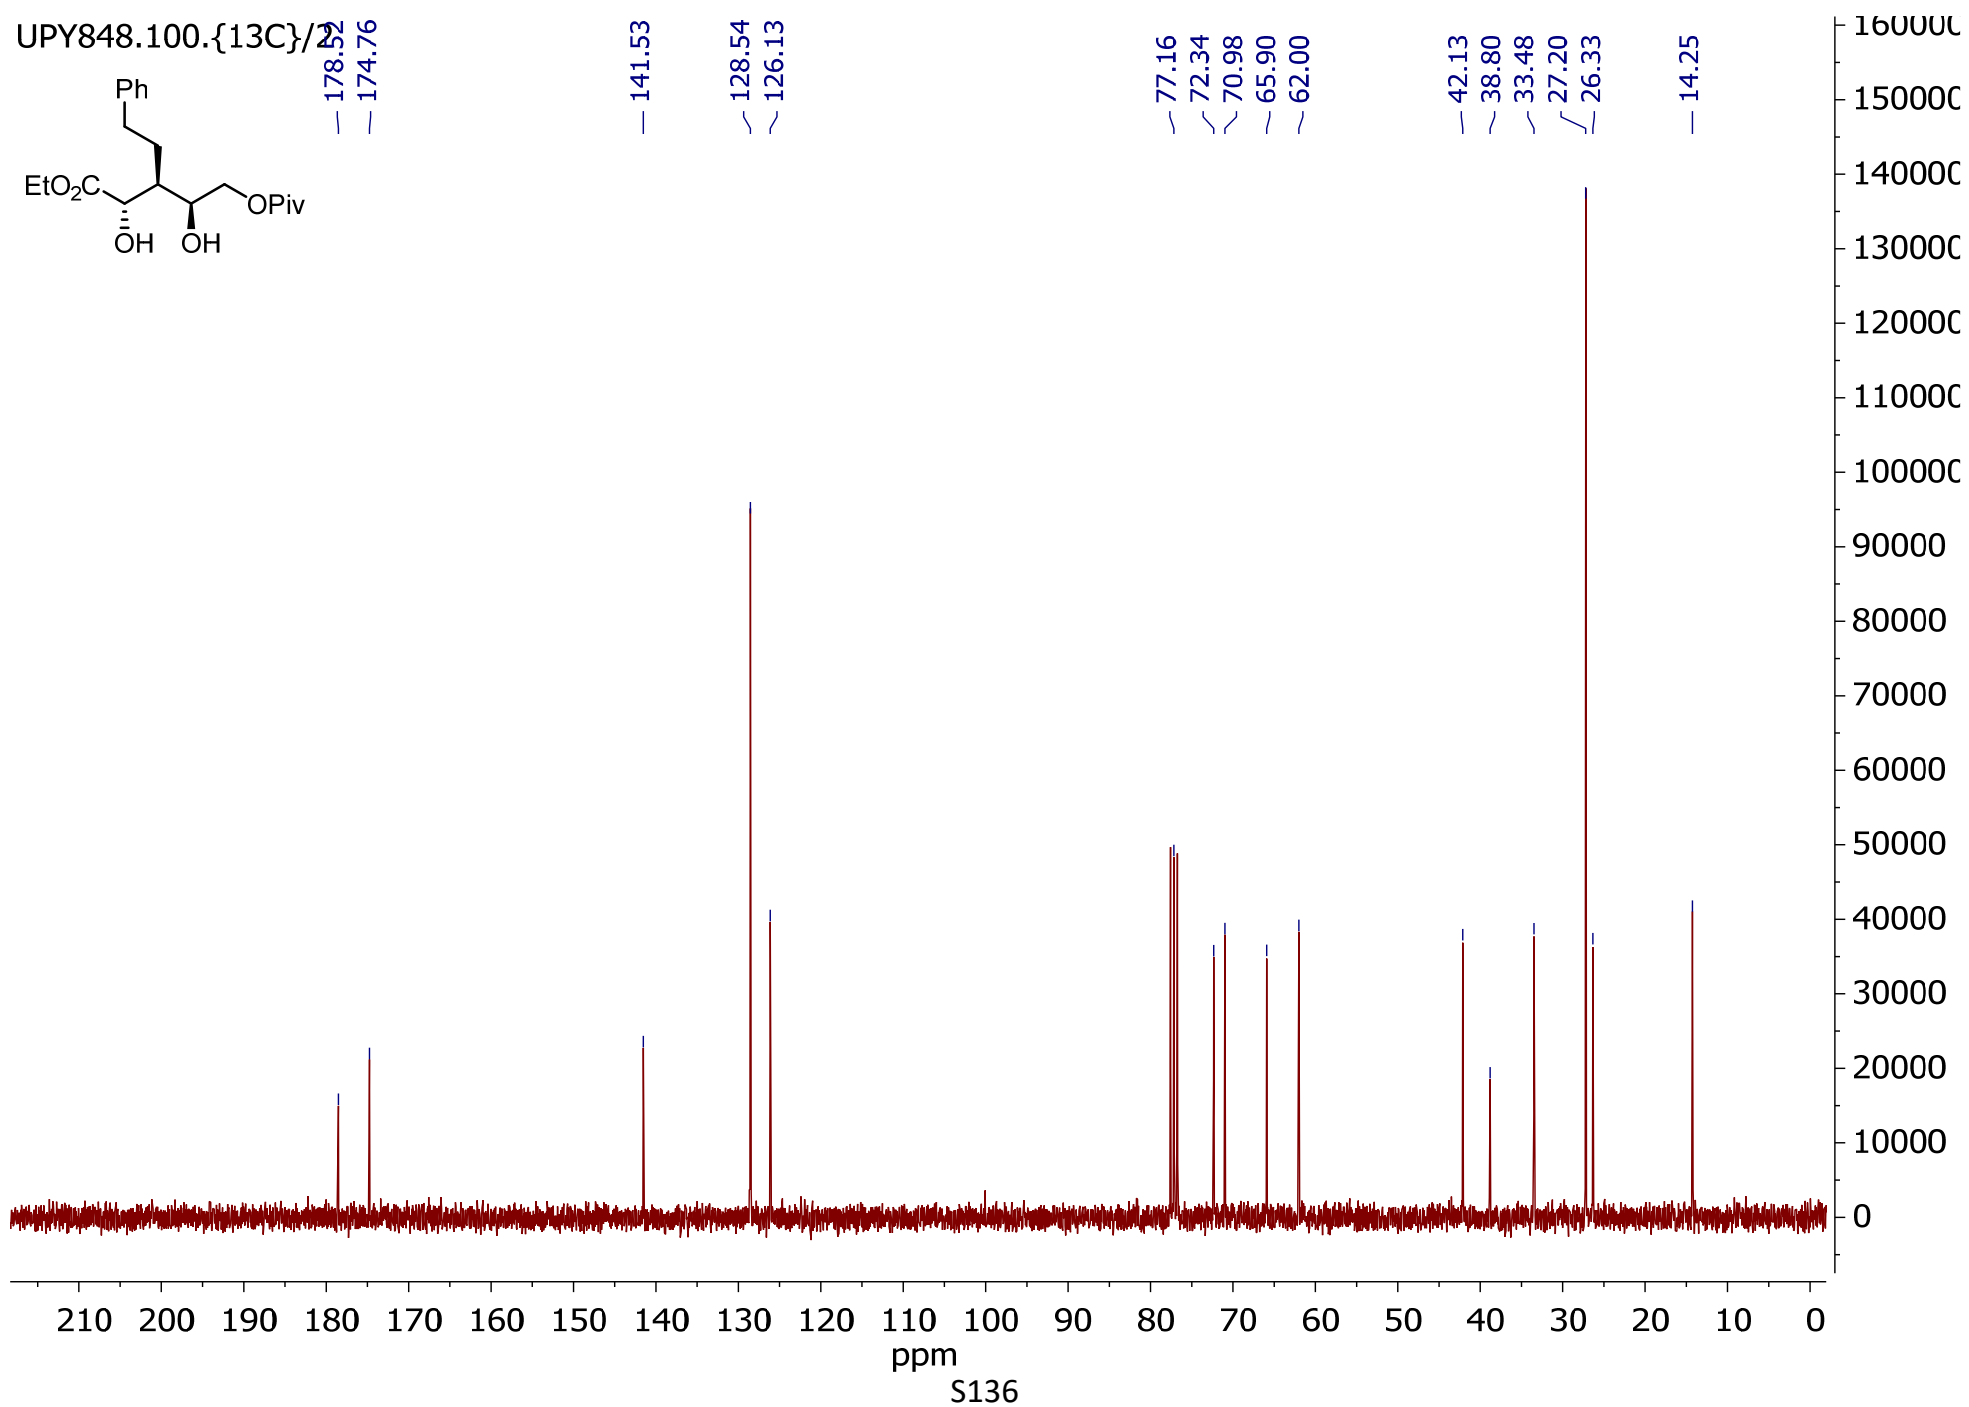



UPY848.100.{13C}deptsp135/3

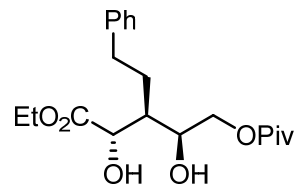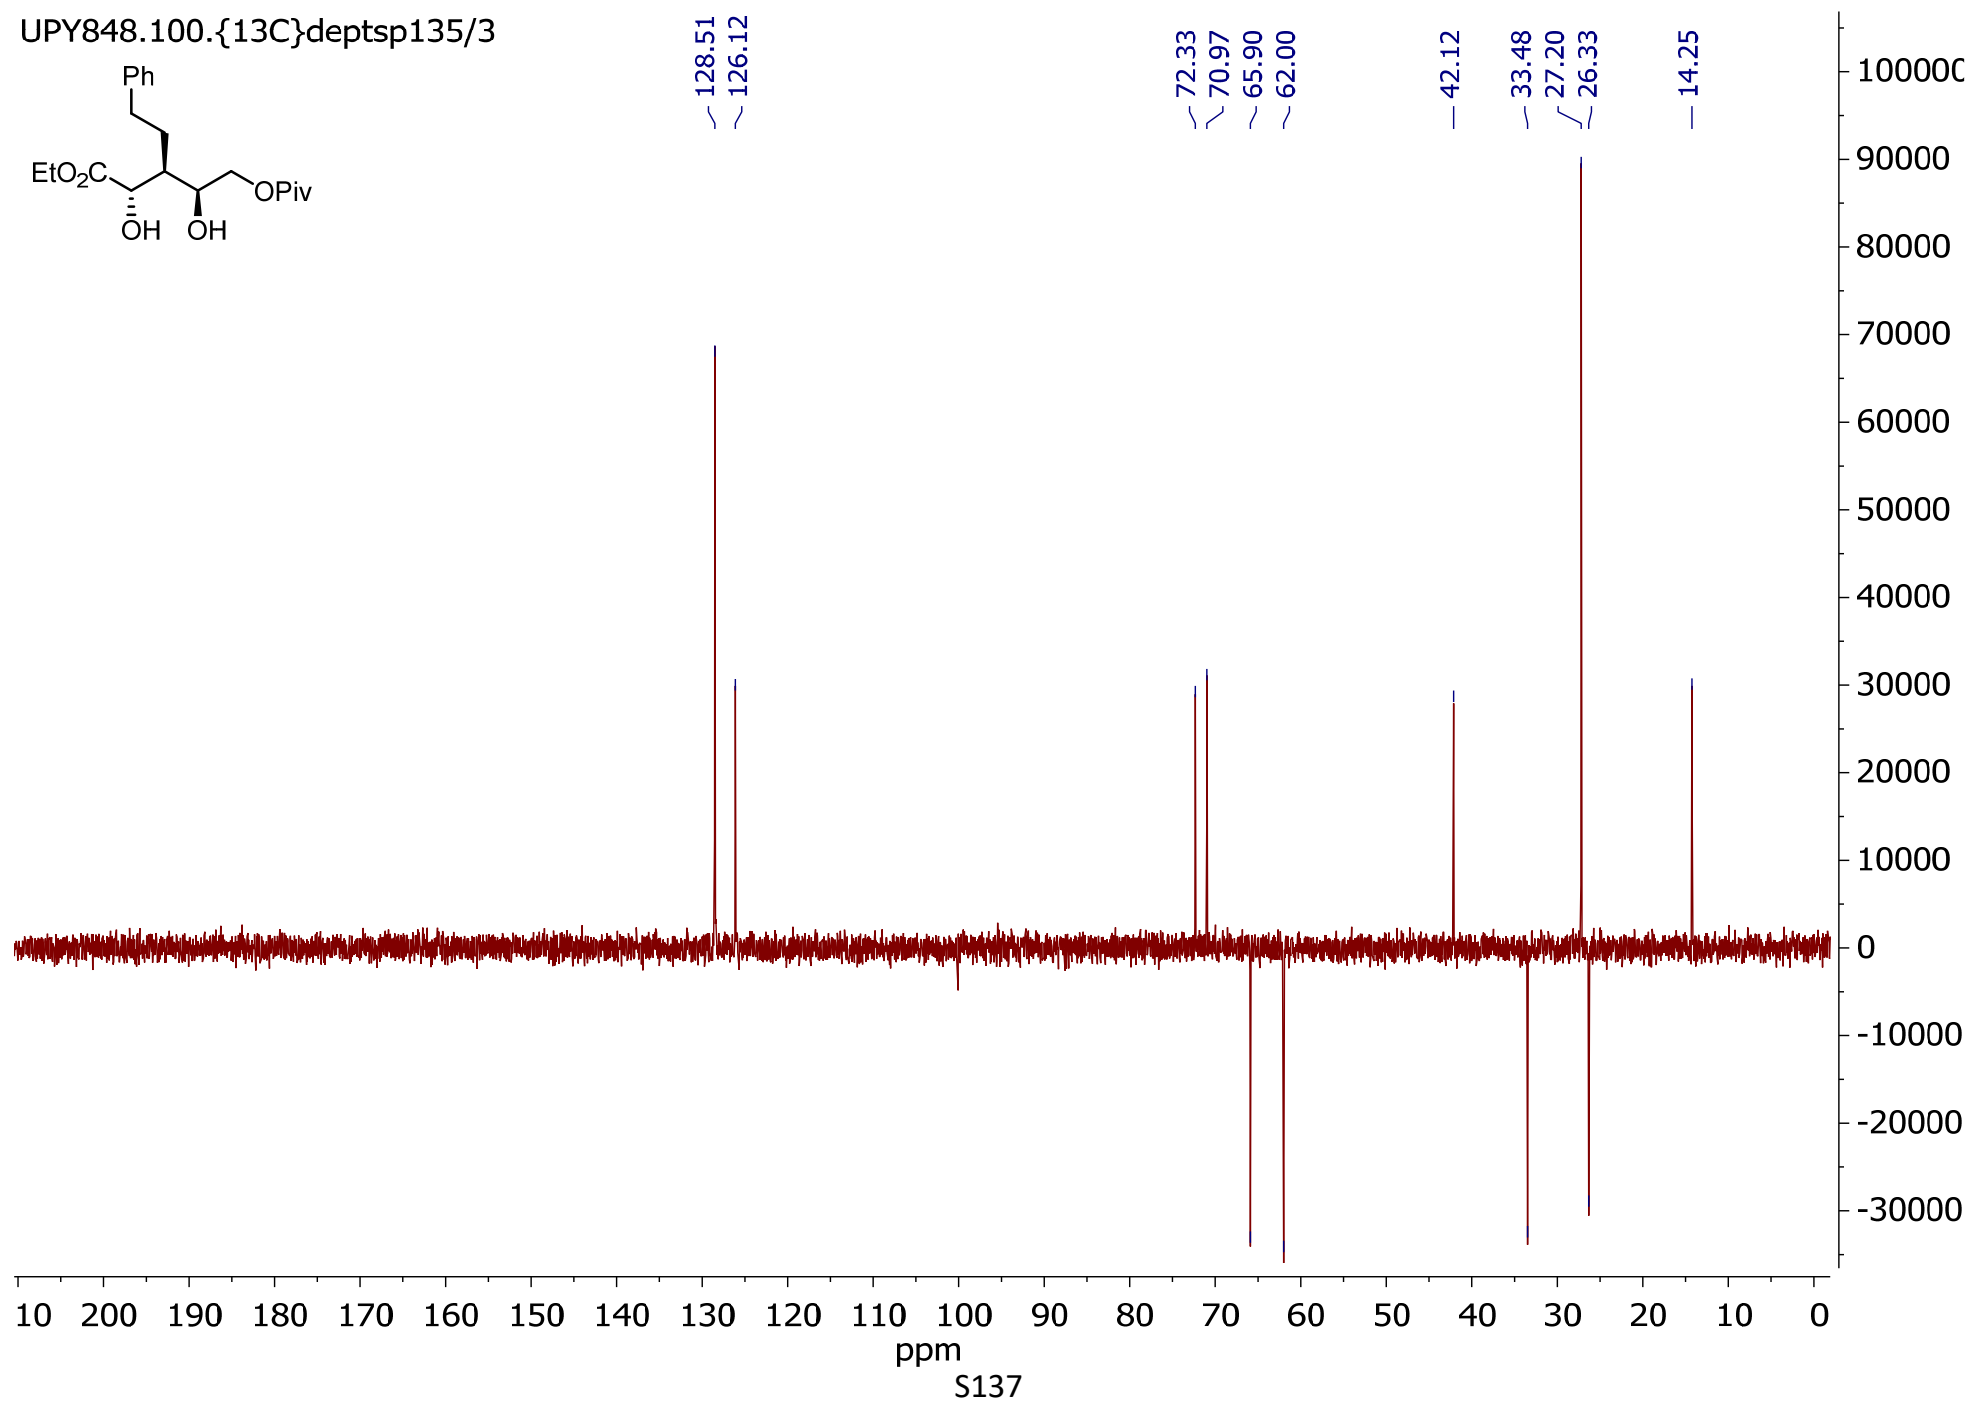

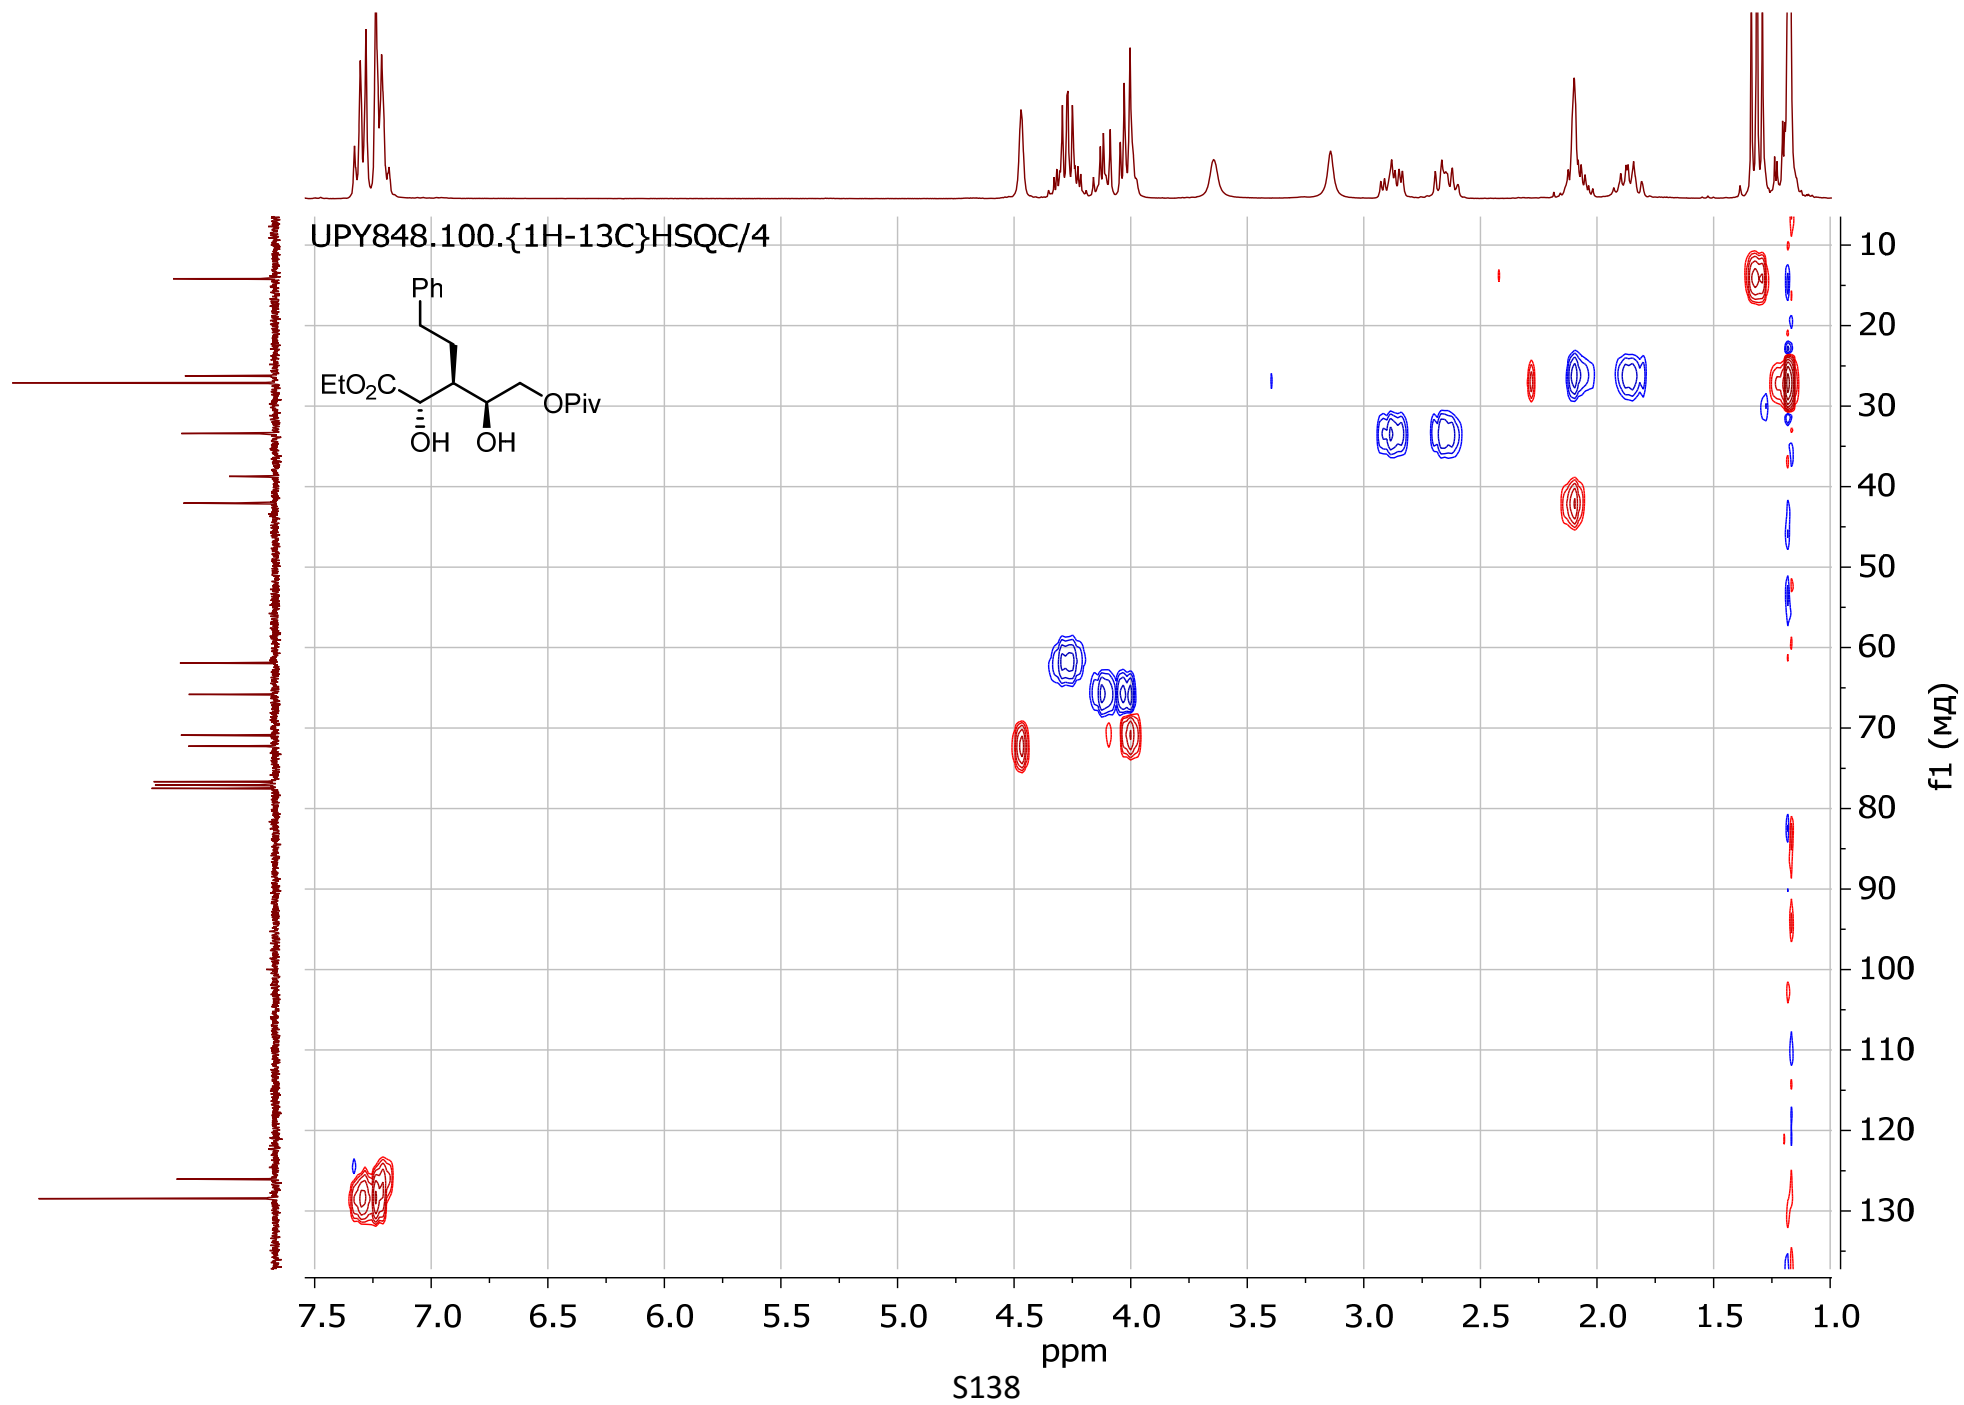

UPY848.100.{1H-13C}HSQC/4

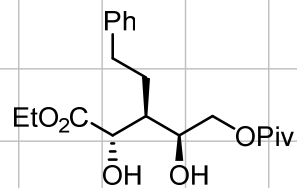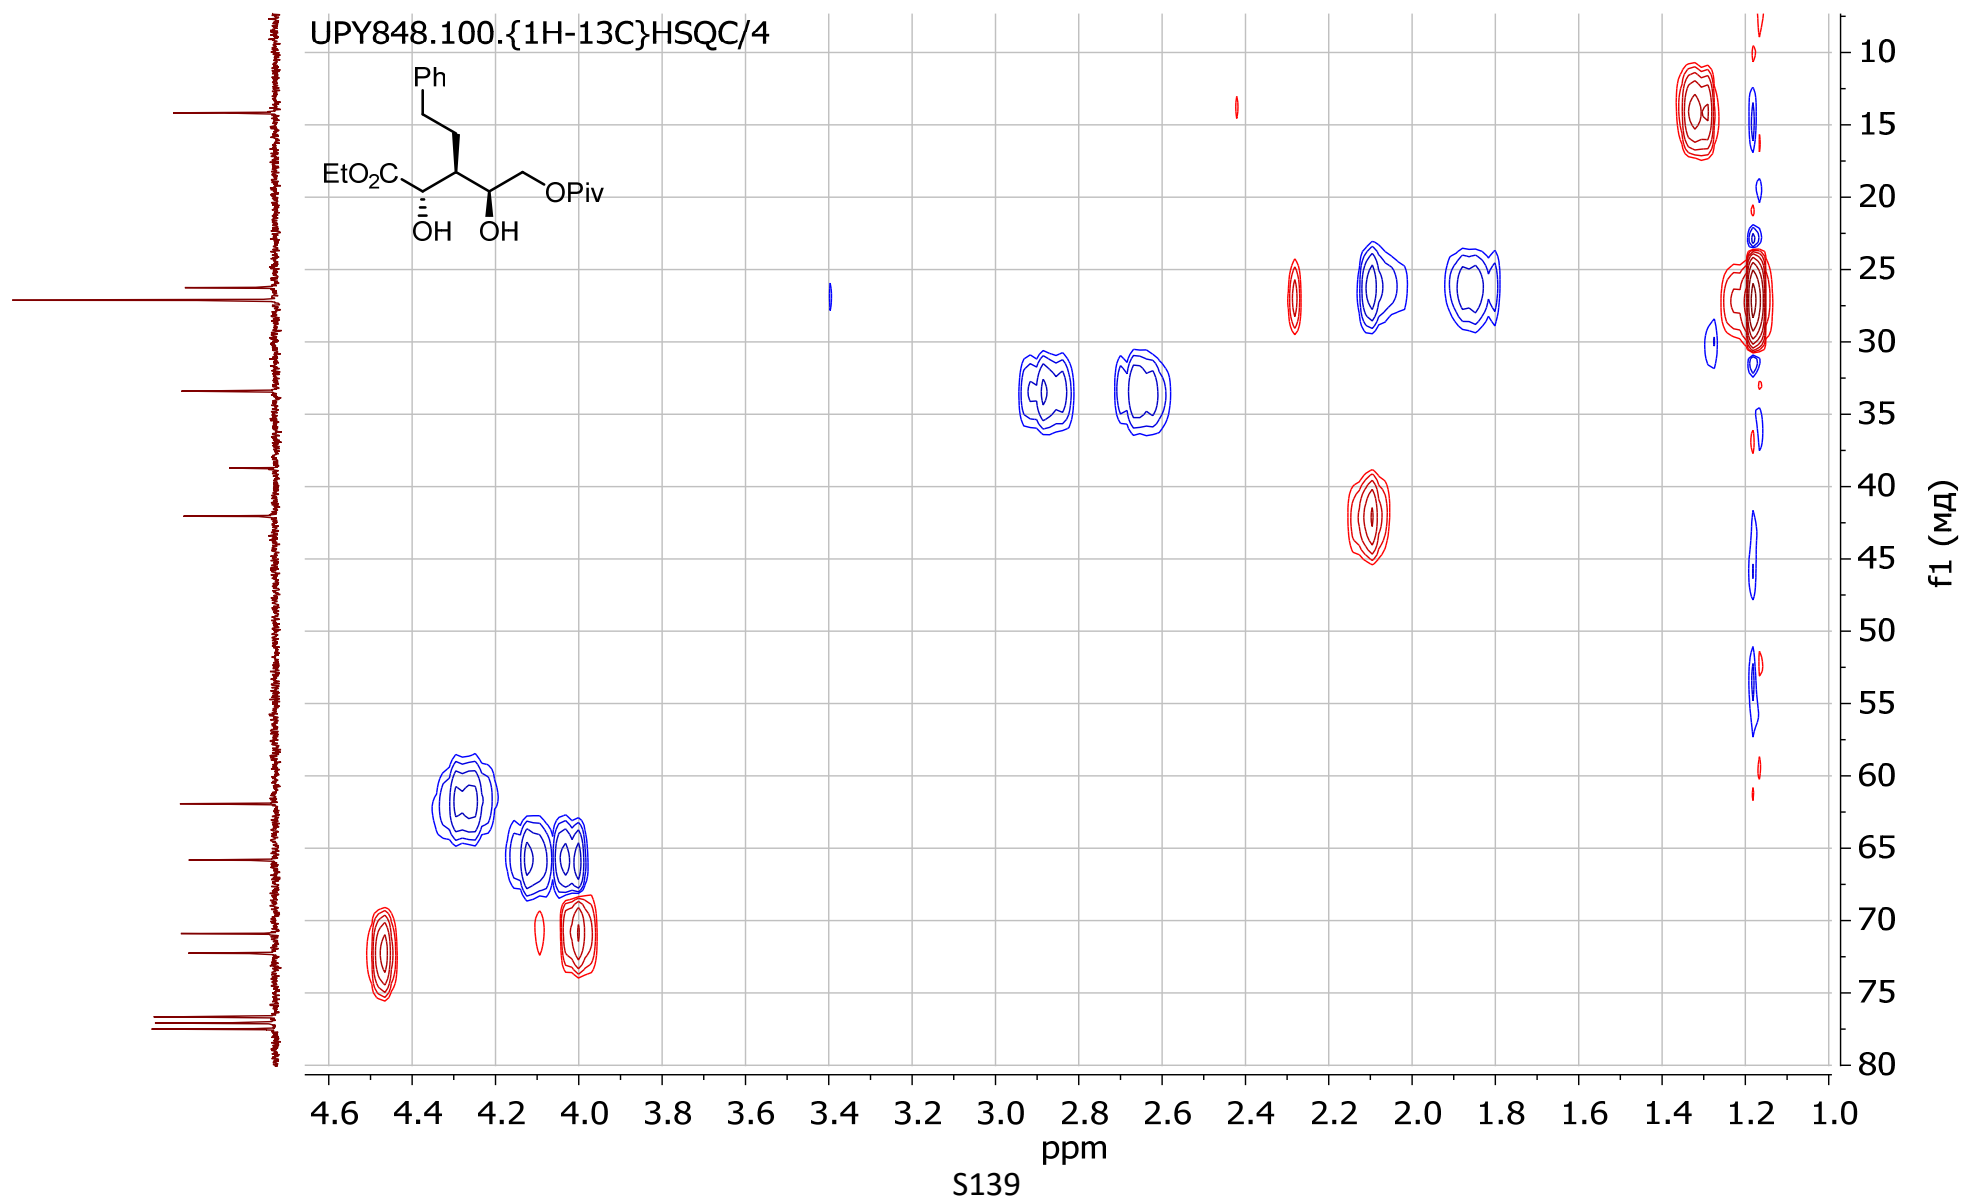

UPY848.200.{1H}/1

### NMR spectra of 18a + 18b

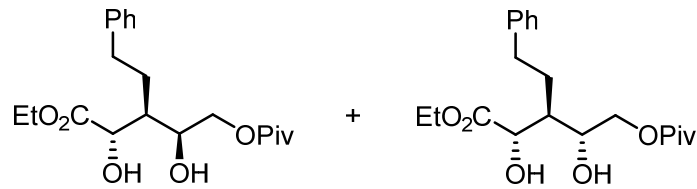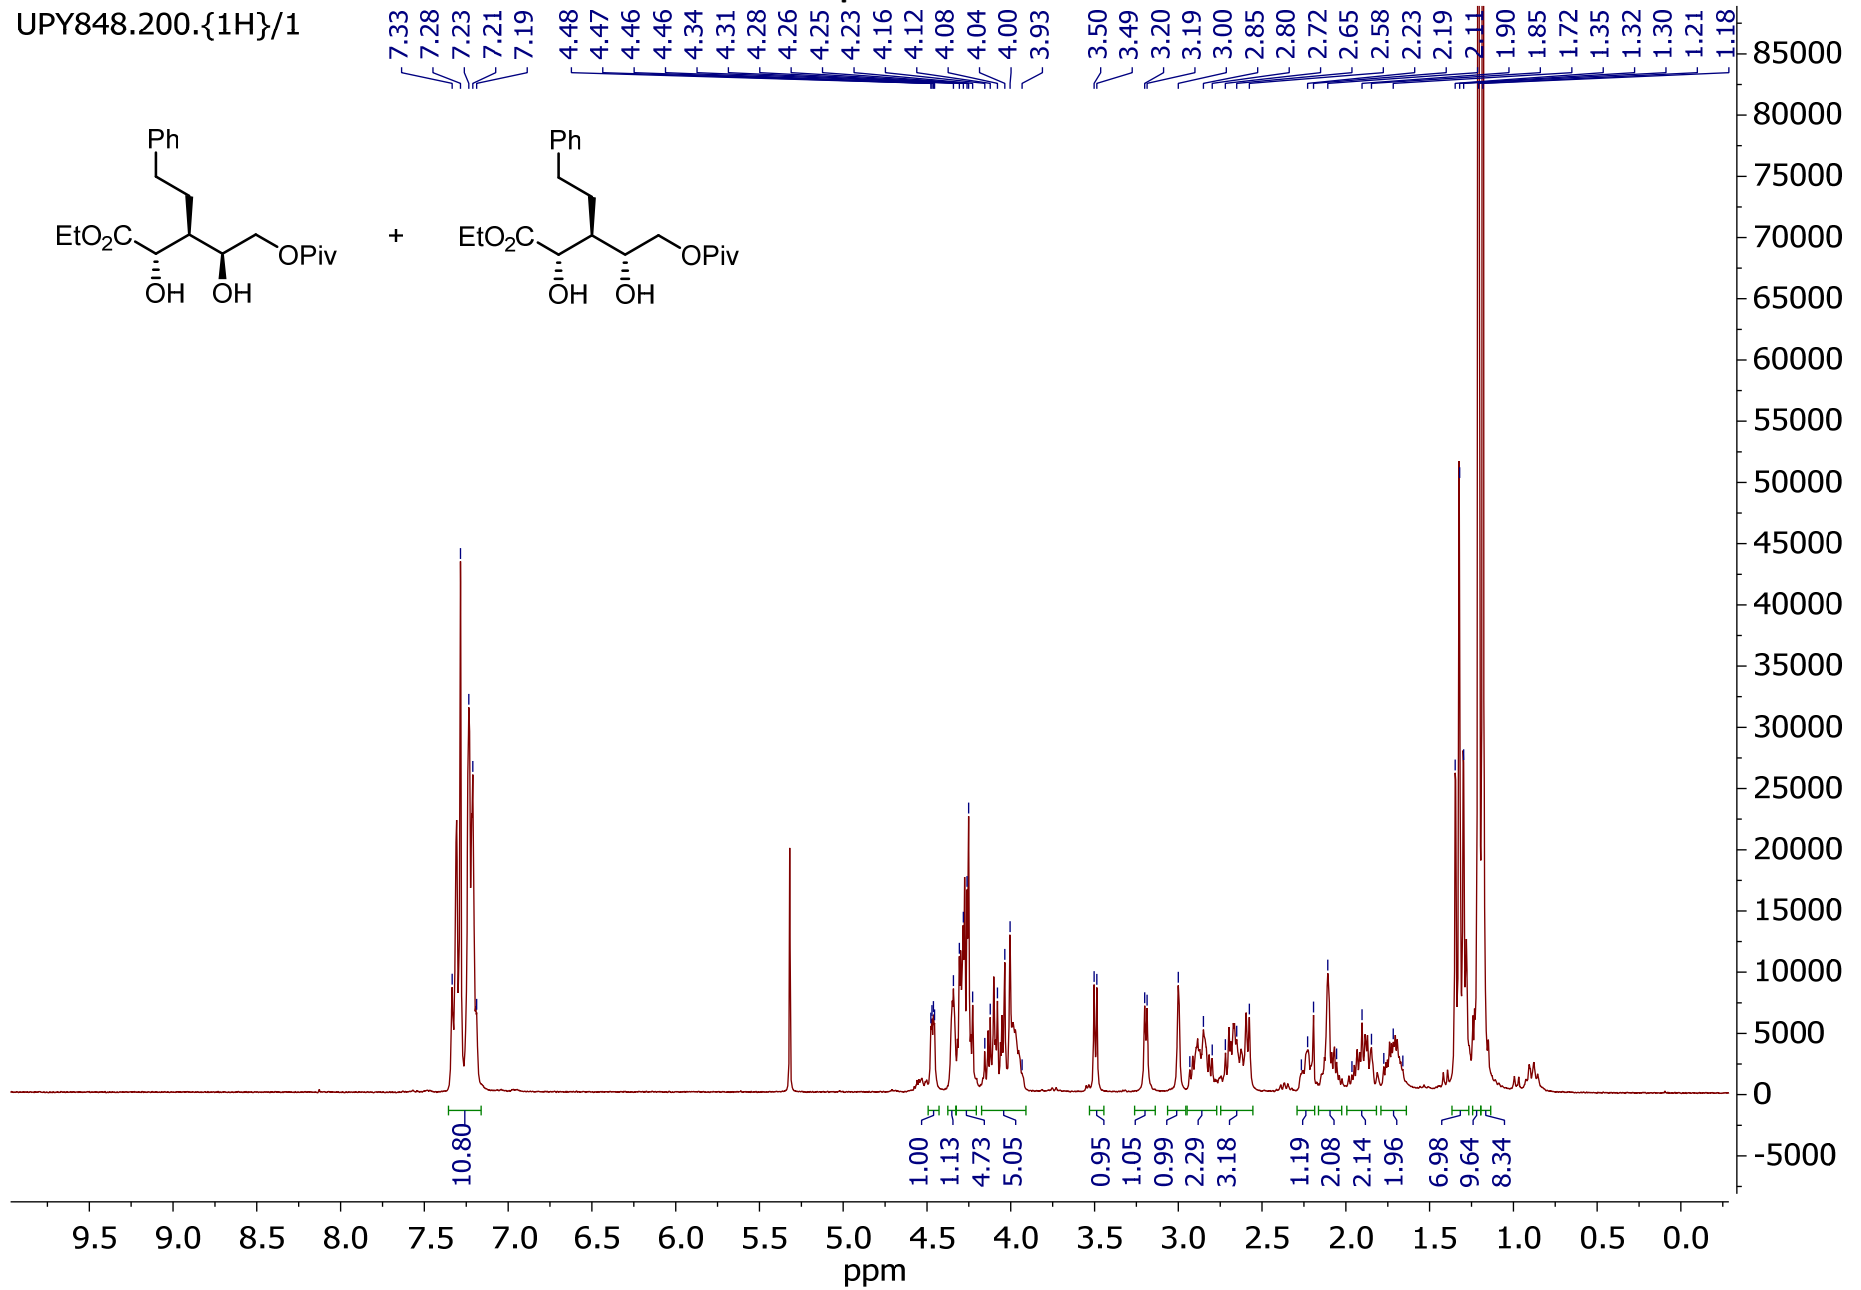

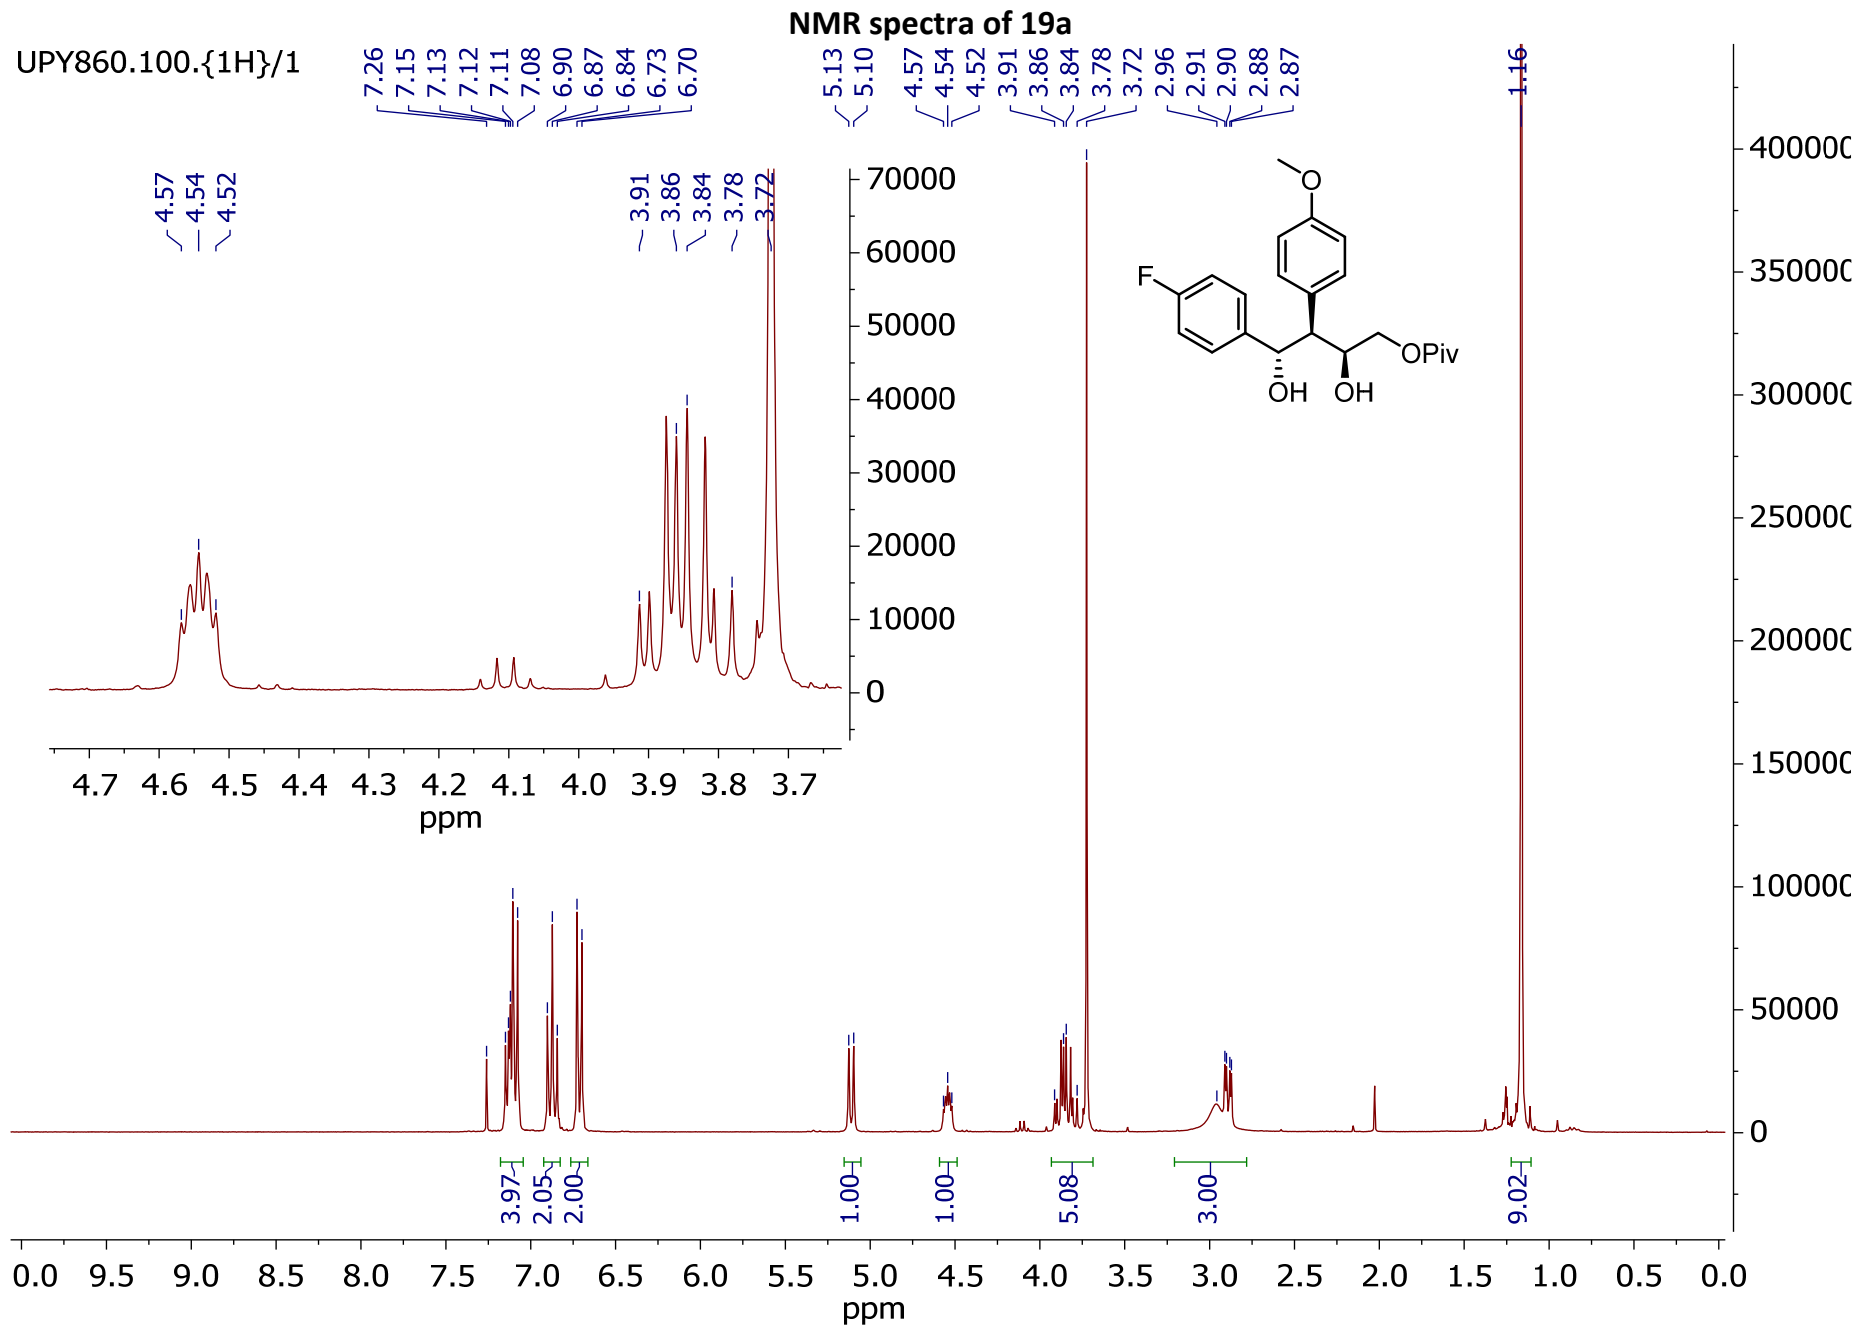

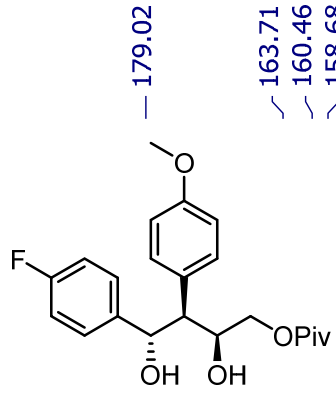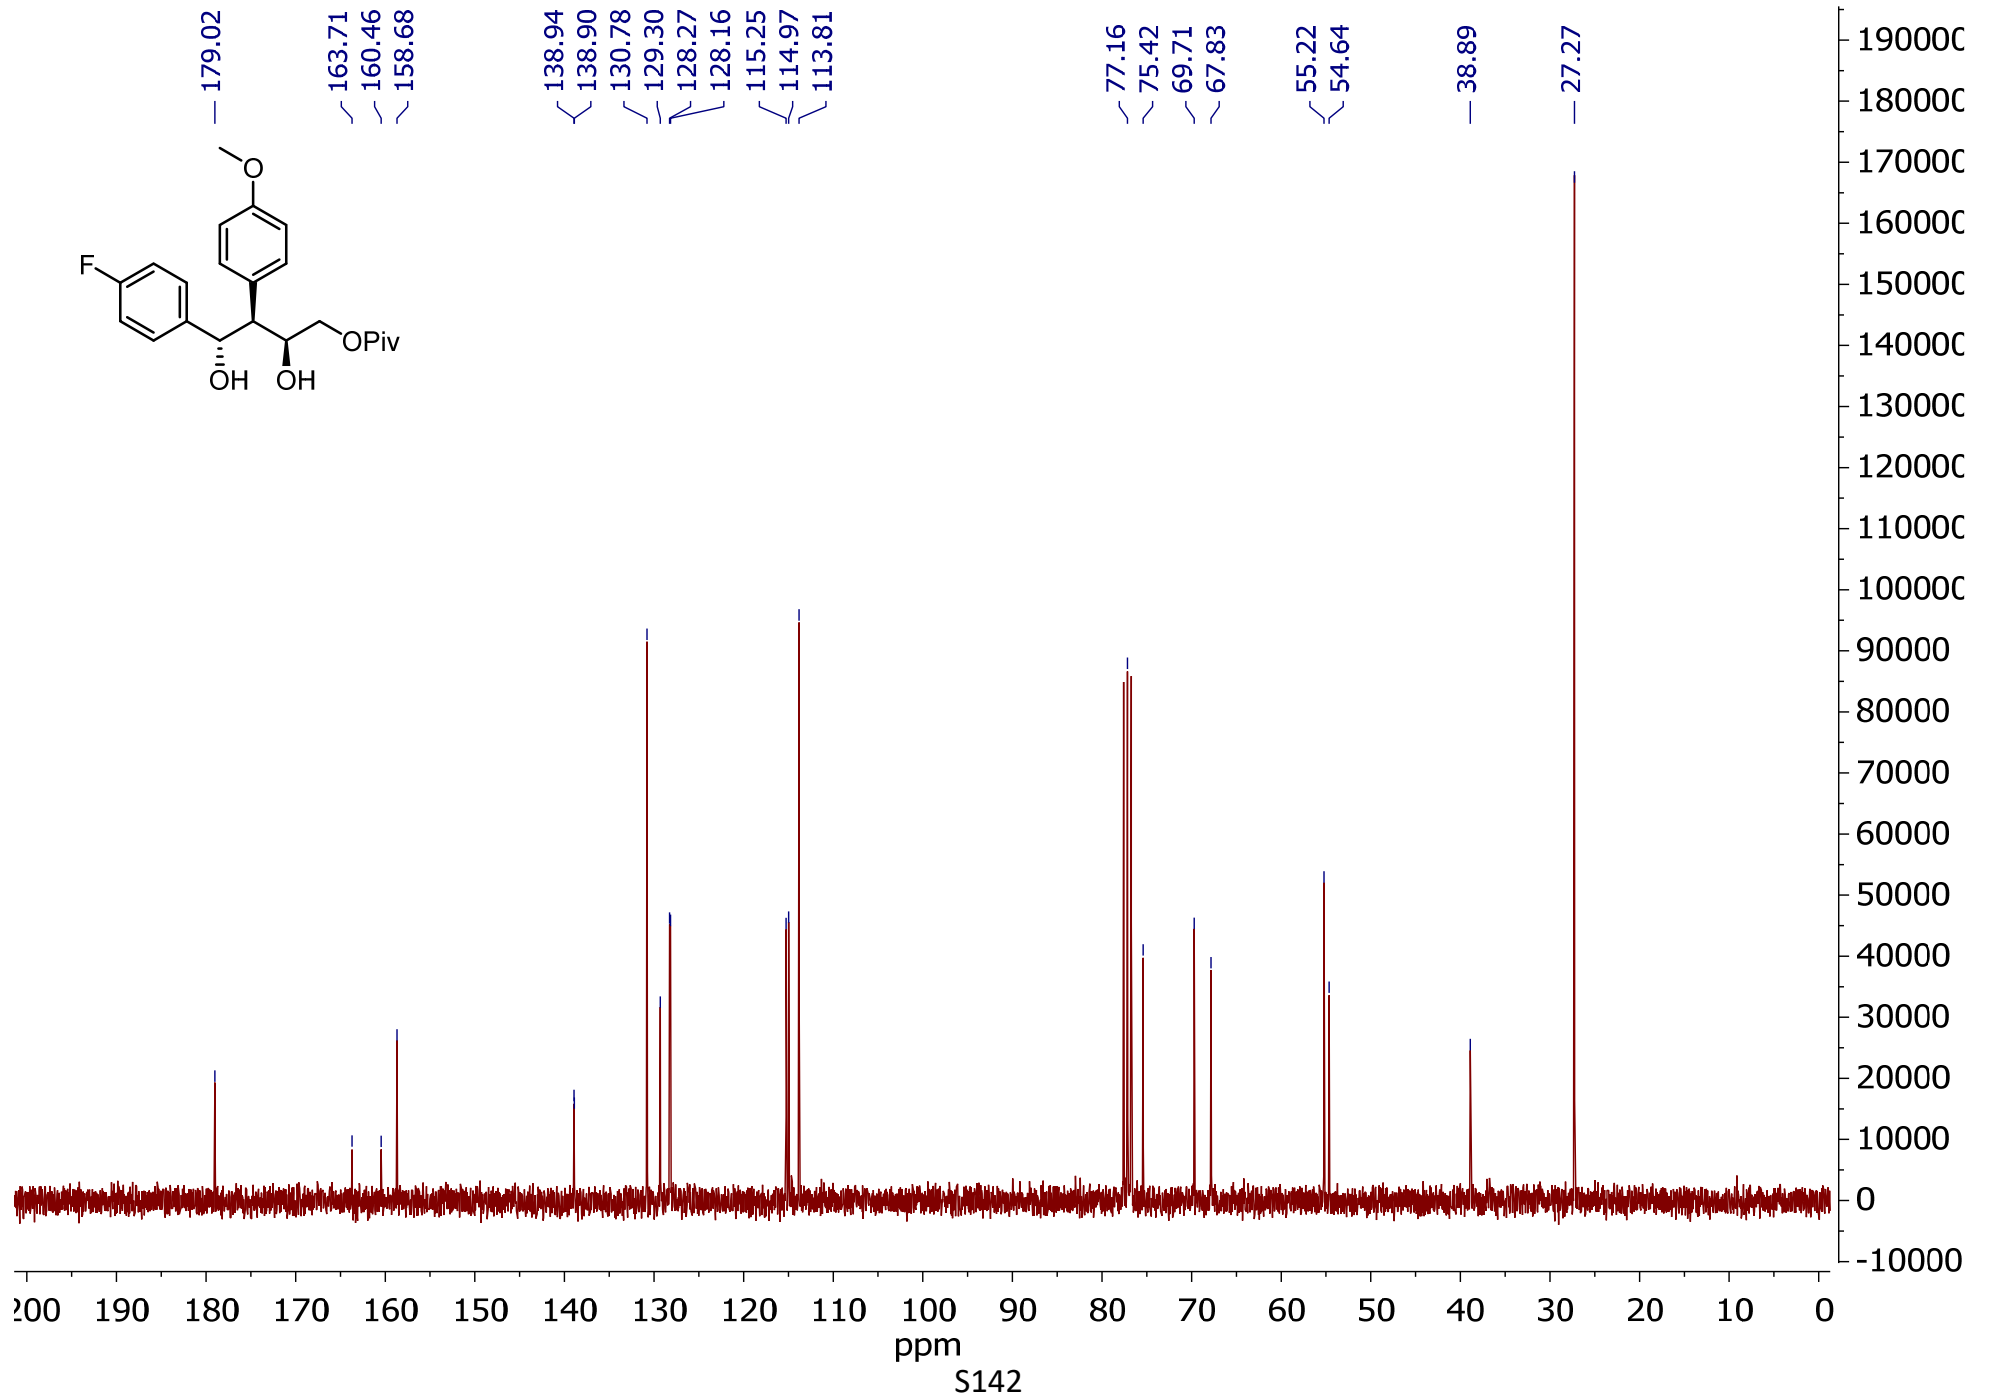

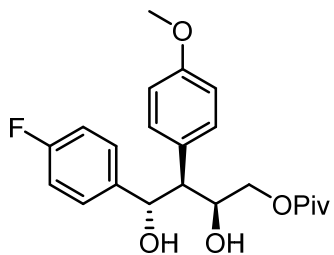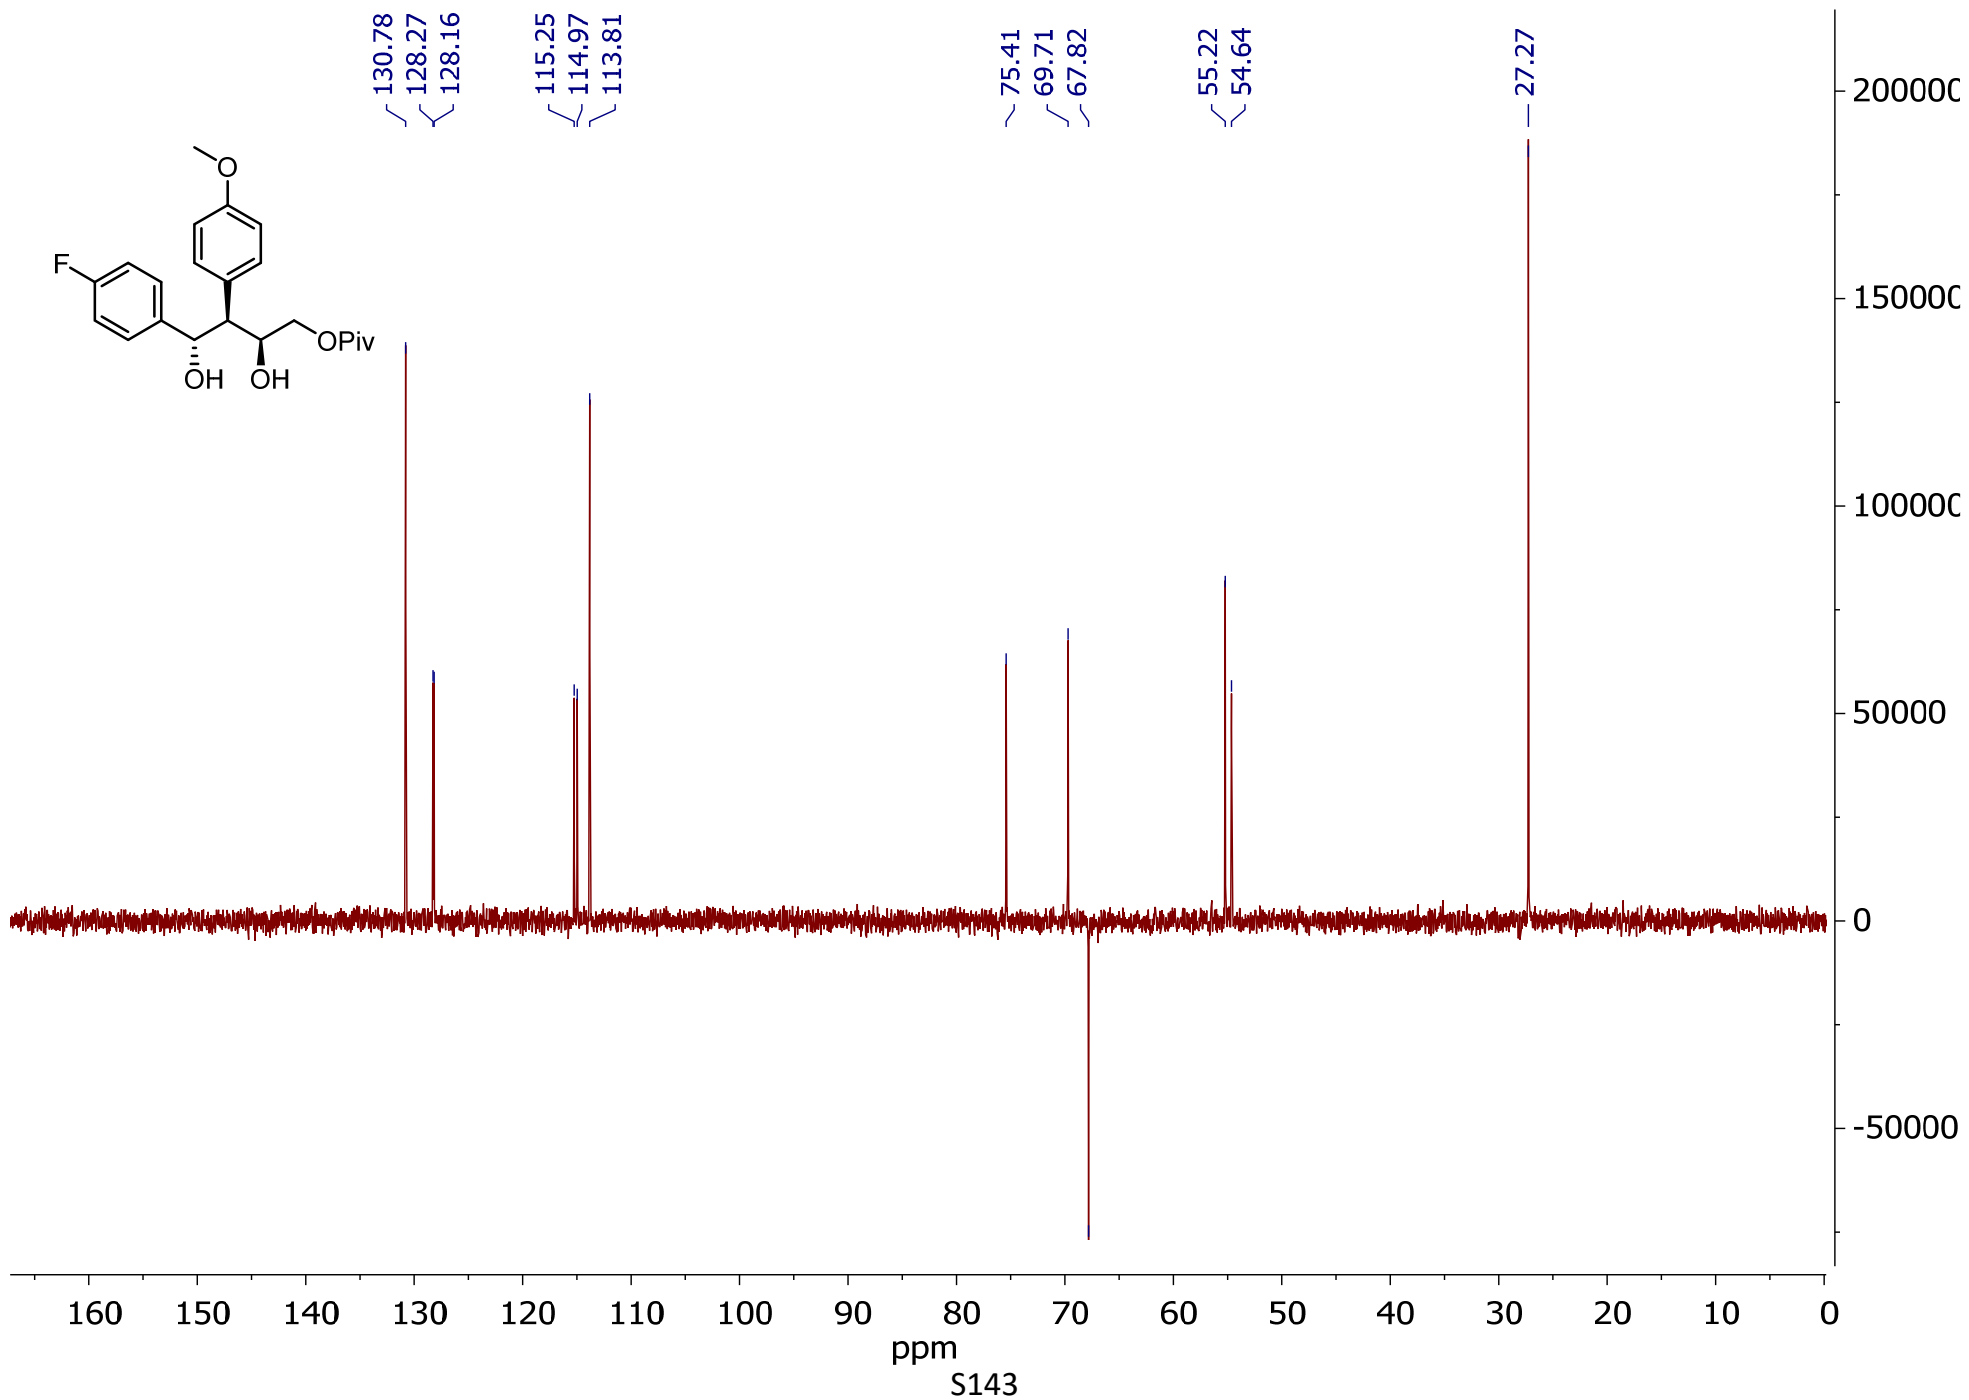

UPY860.100.{19F}INVGATED/5

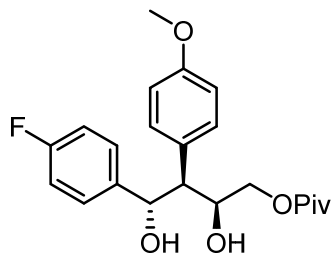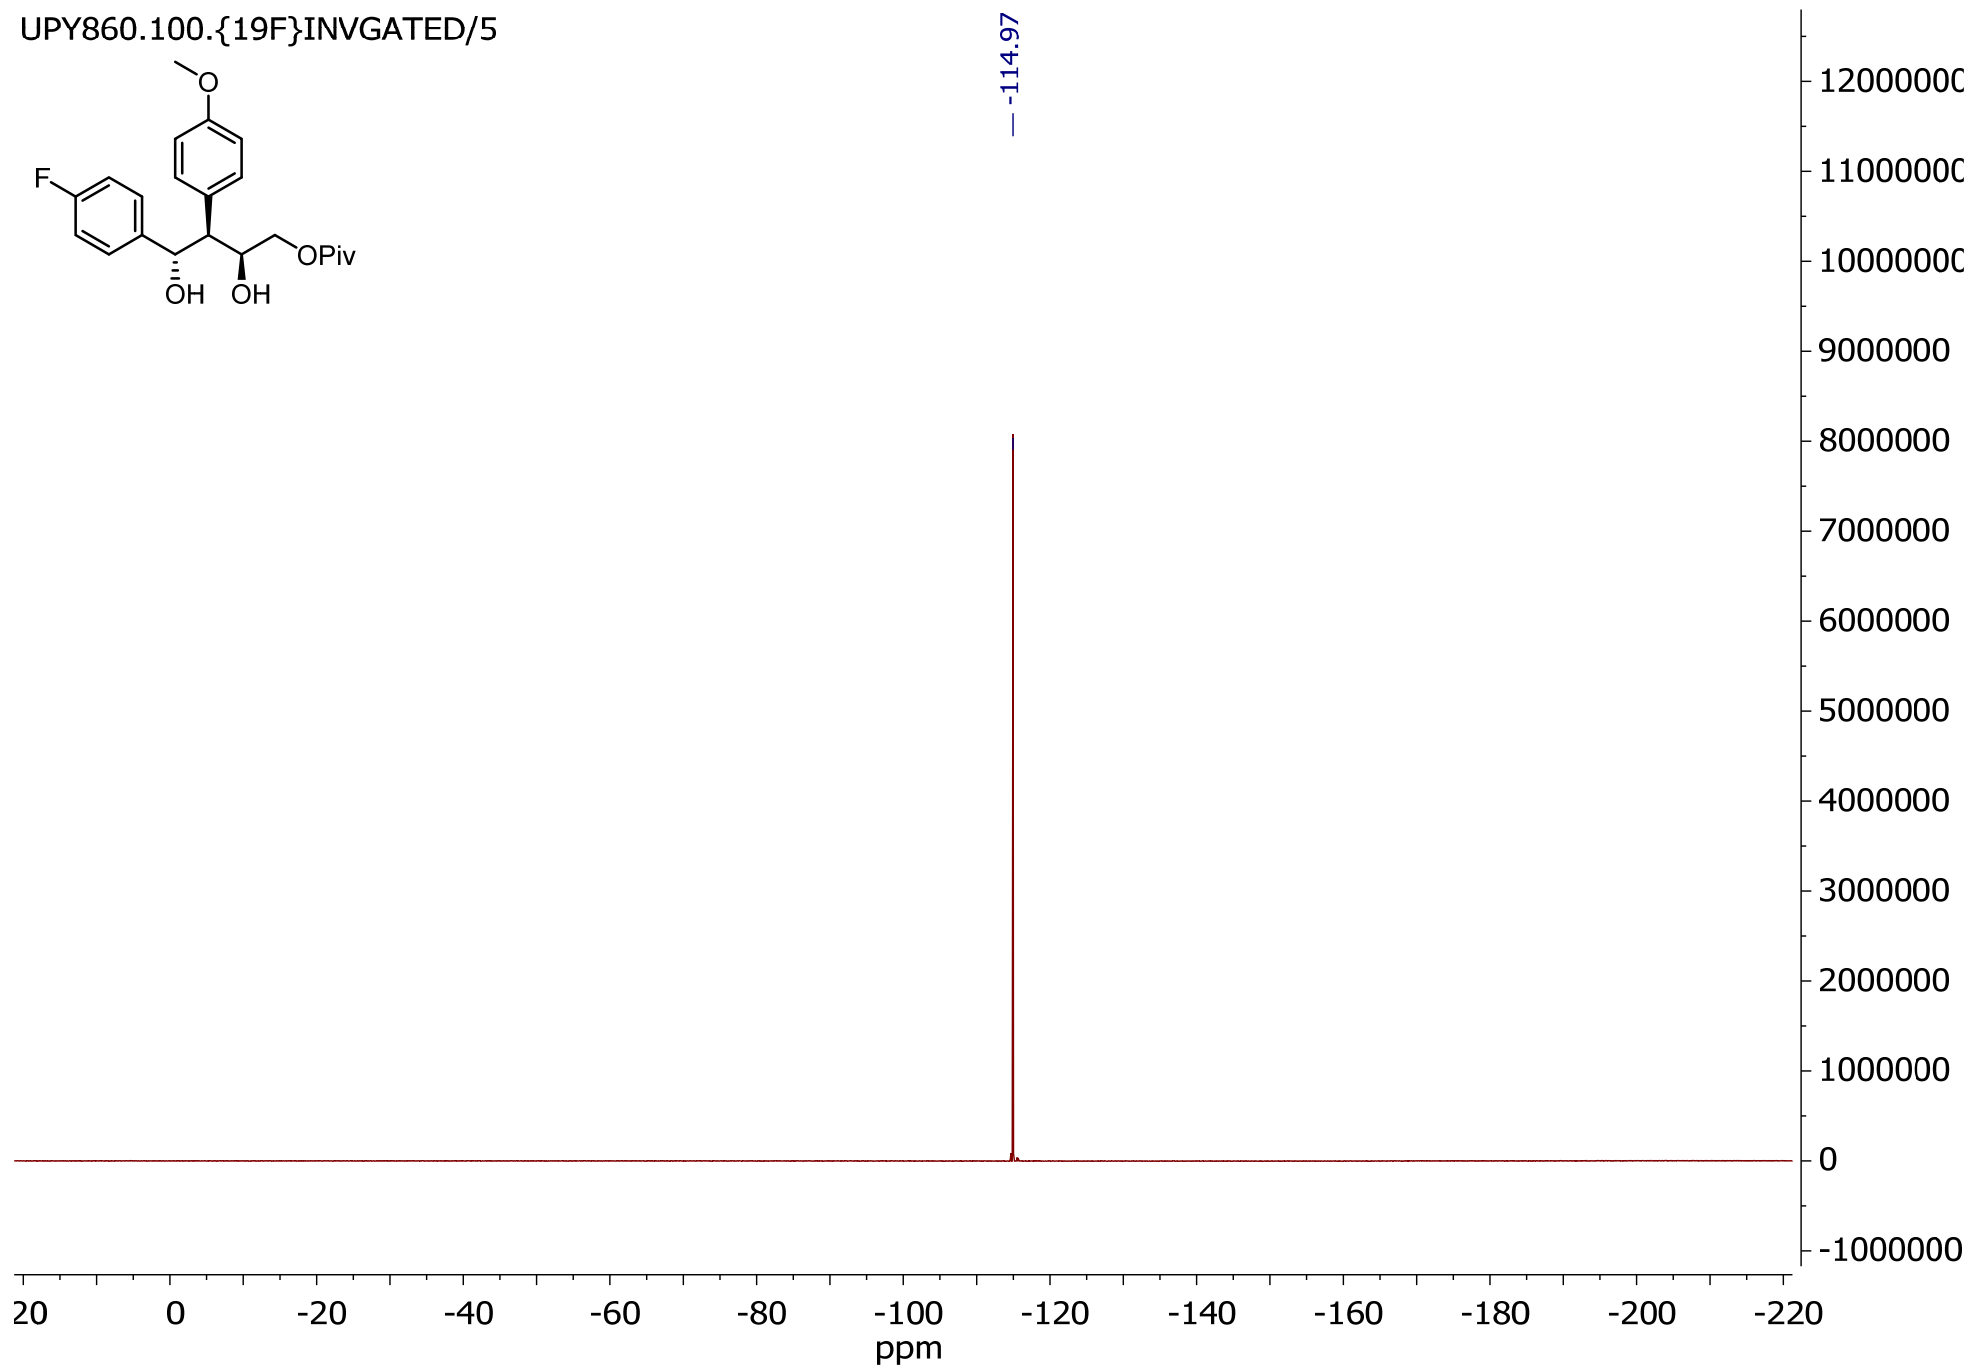

S144



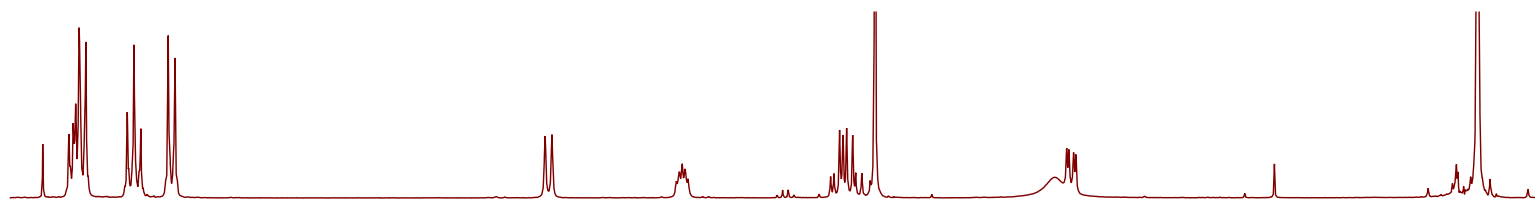

UPY860.100.{1H-13C}HSQC/4

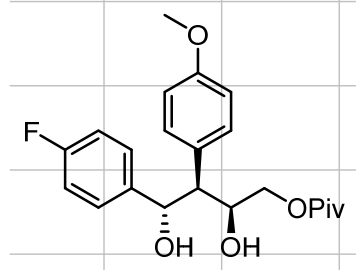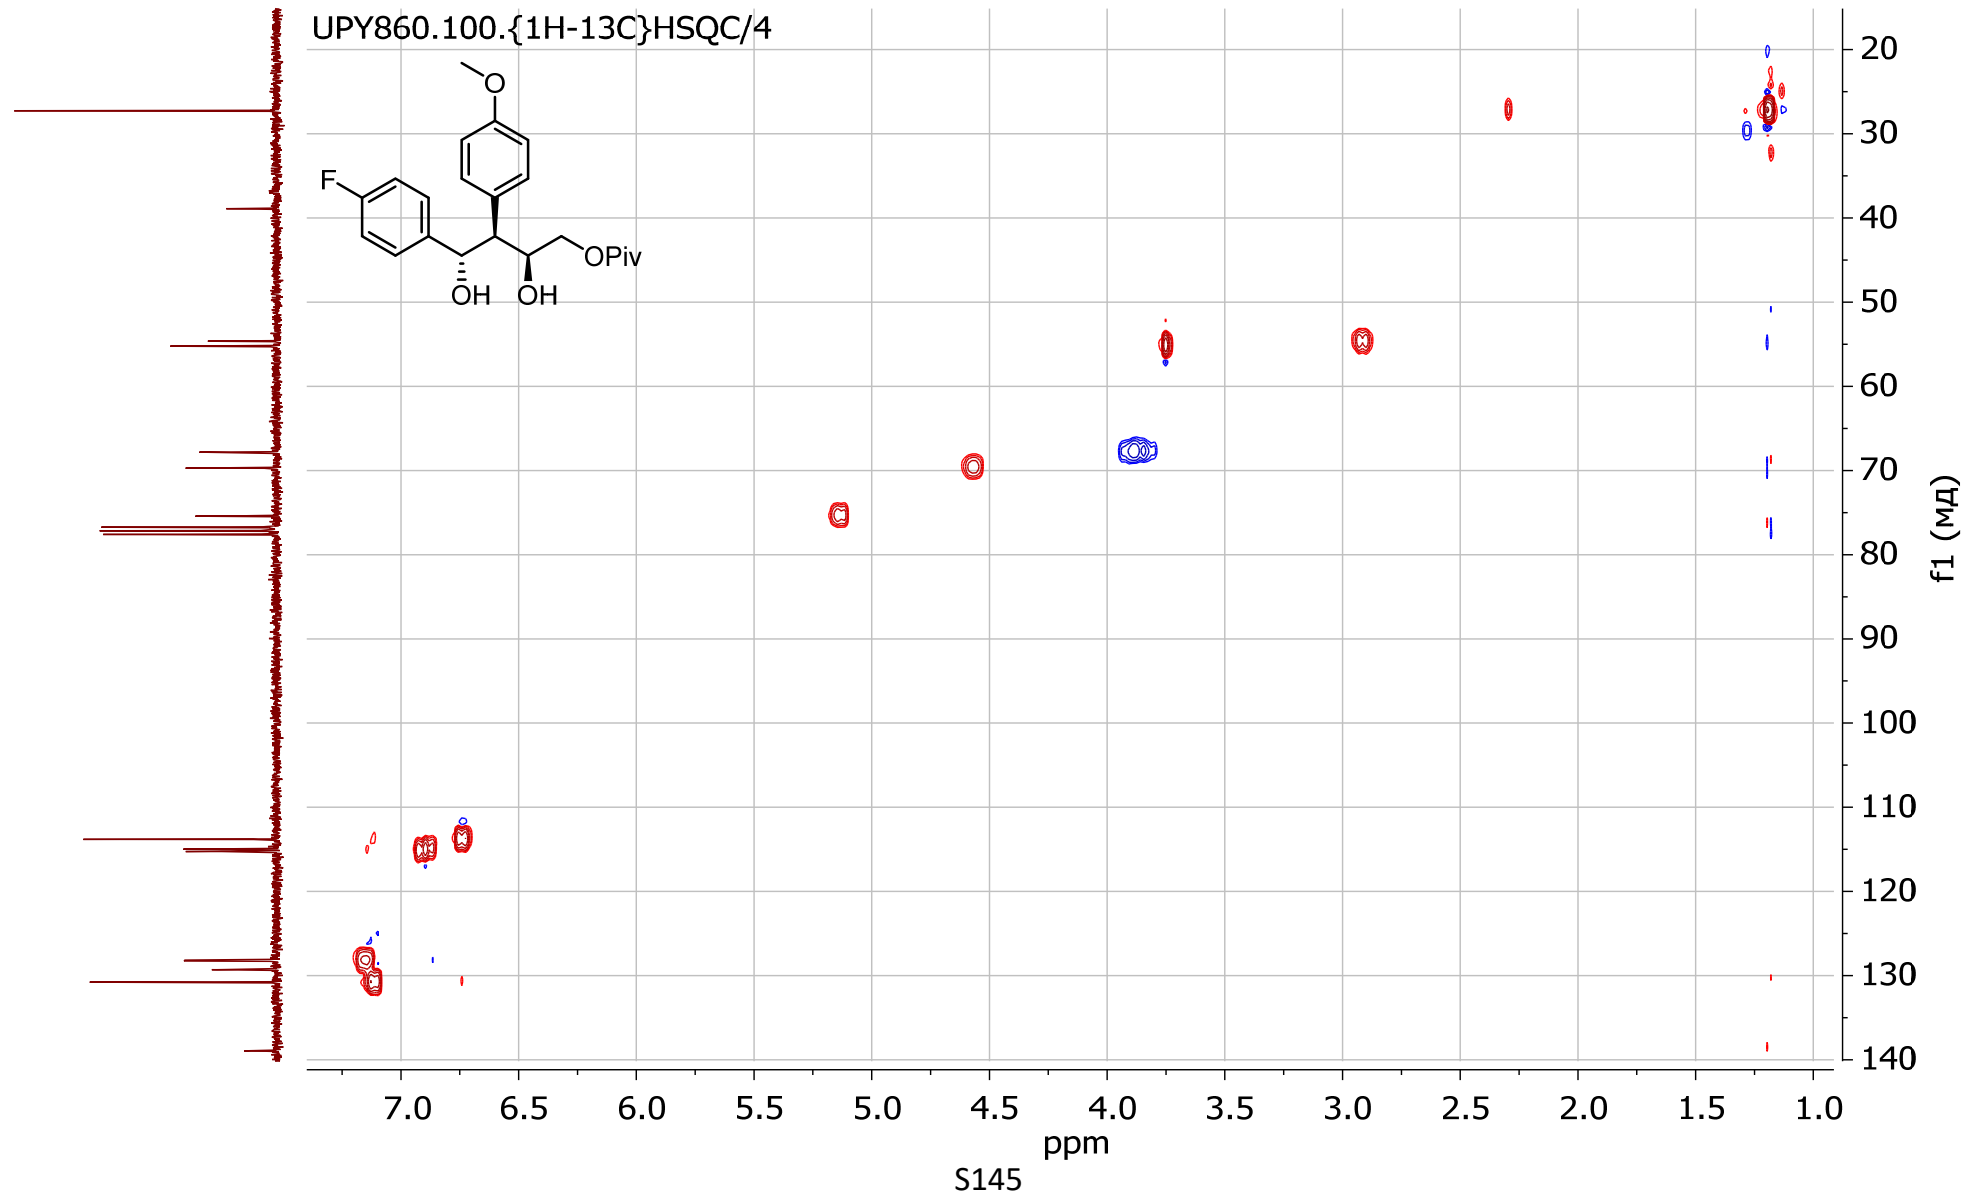

S145

UPY839.201.{1H}/1

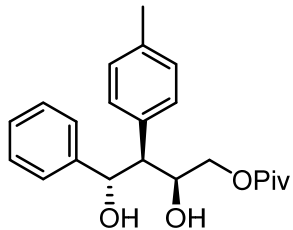

### NMR spectra of 19b

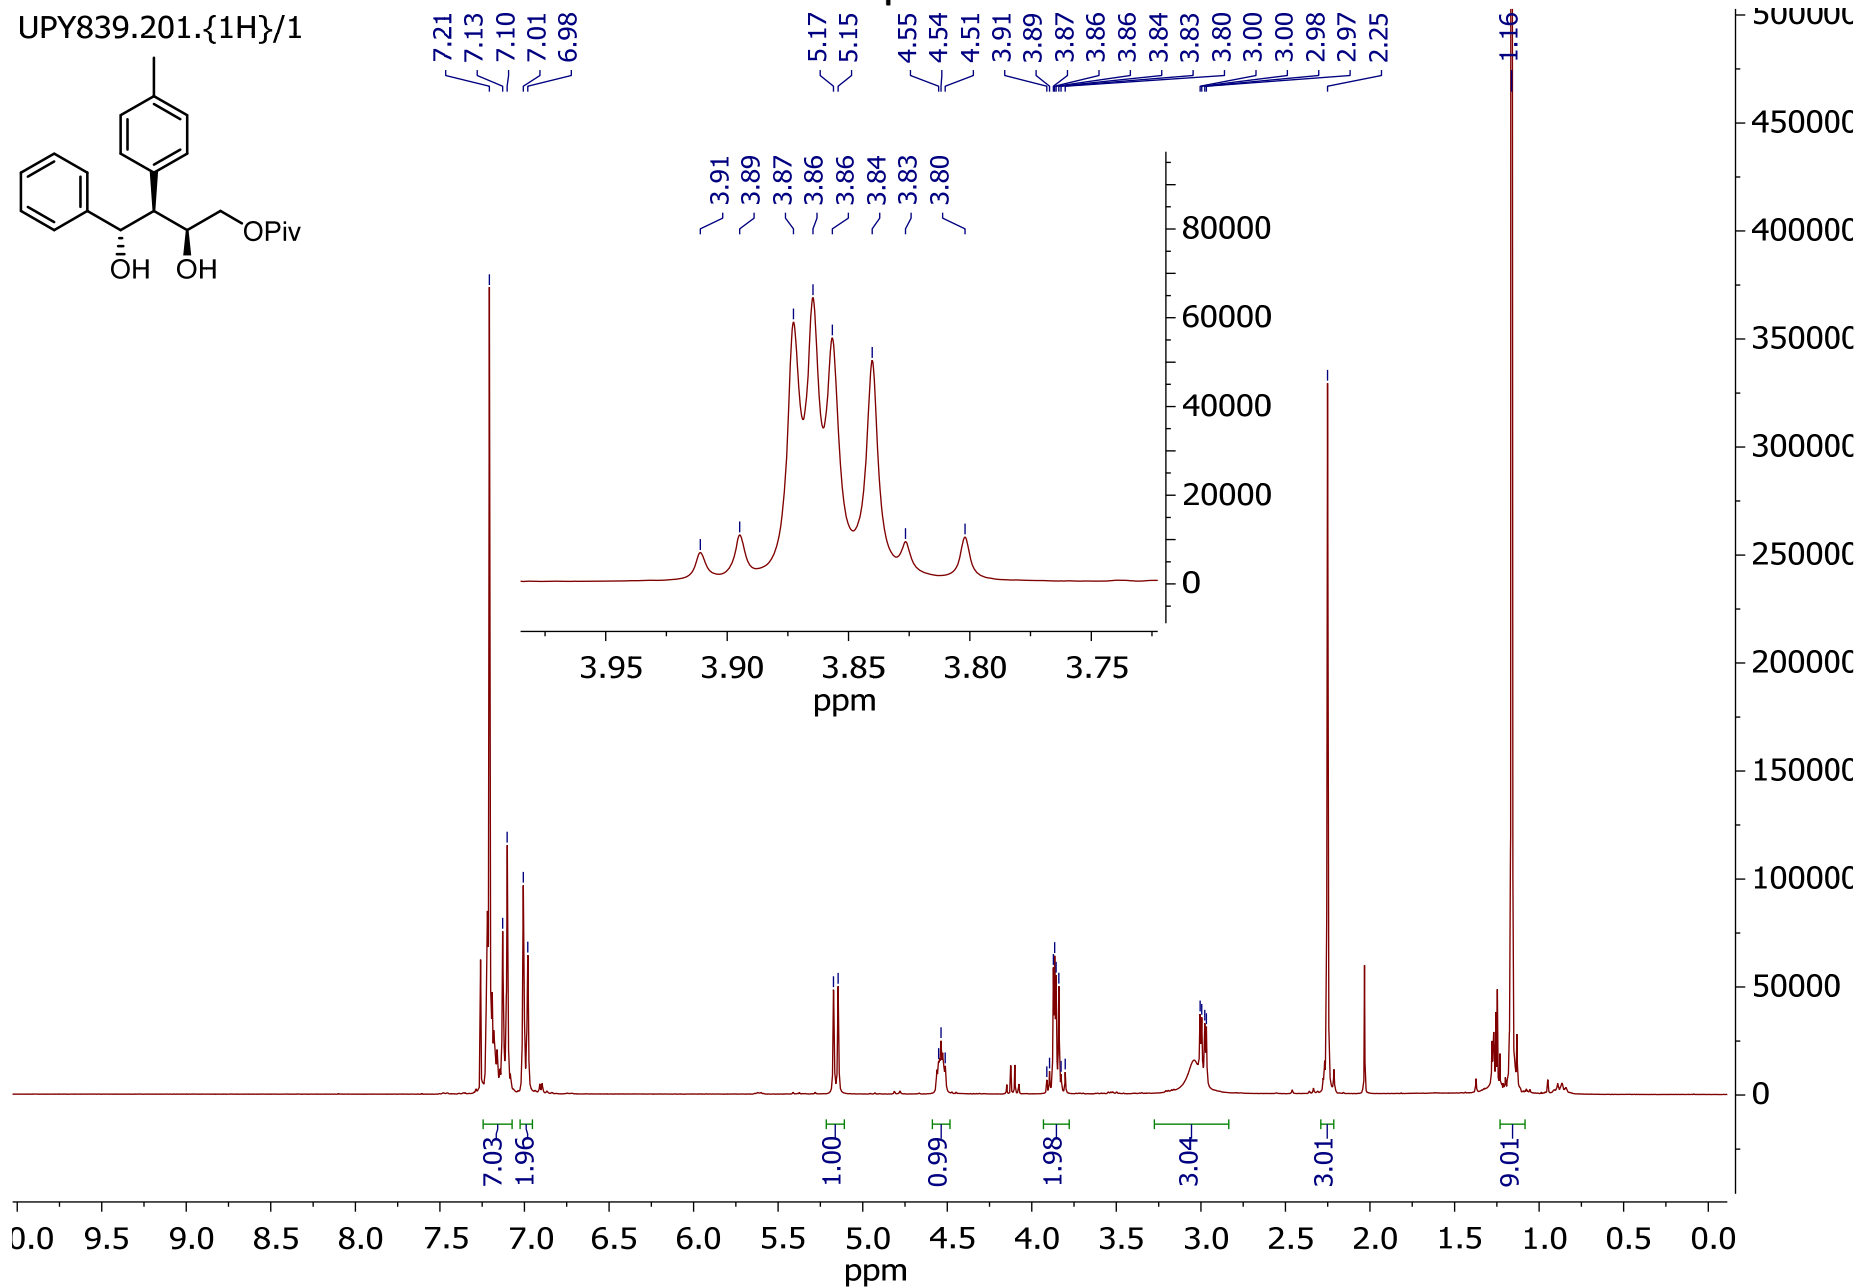

UPY839.201.{13C}/

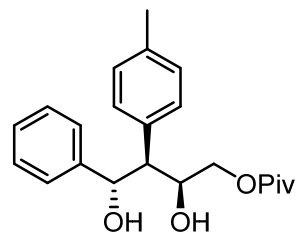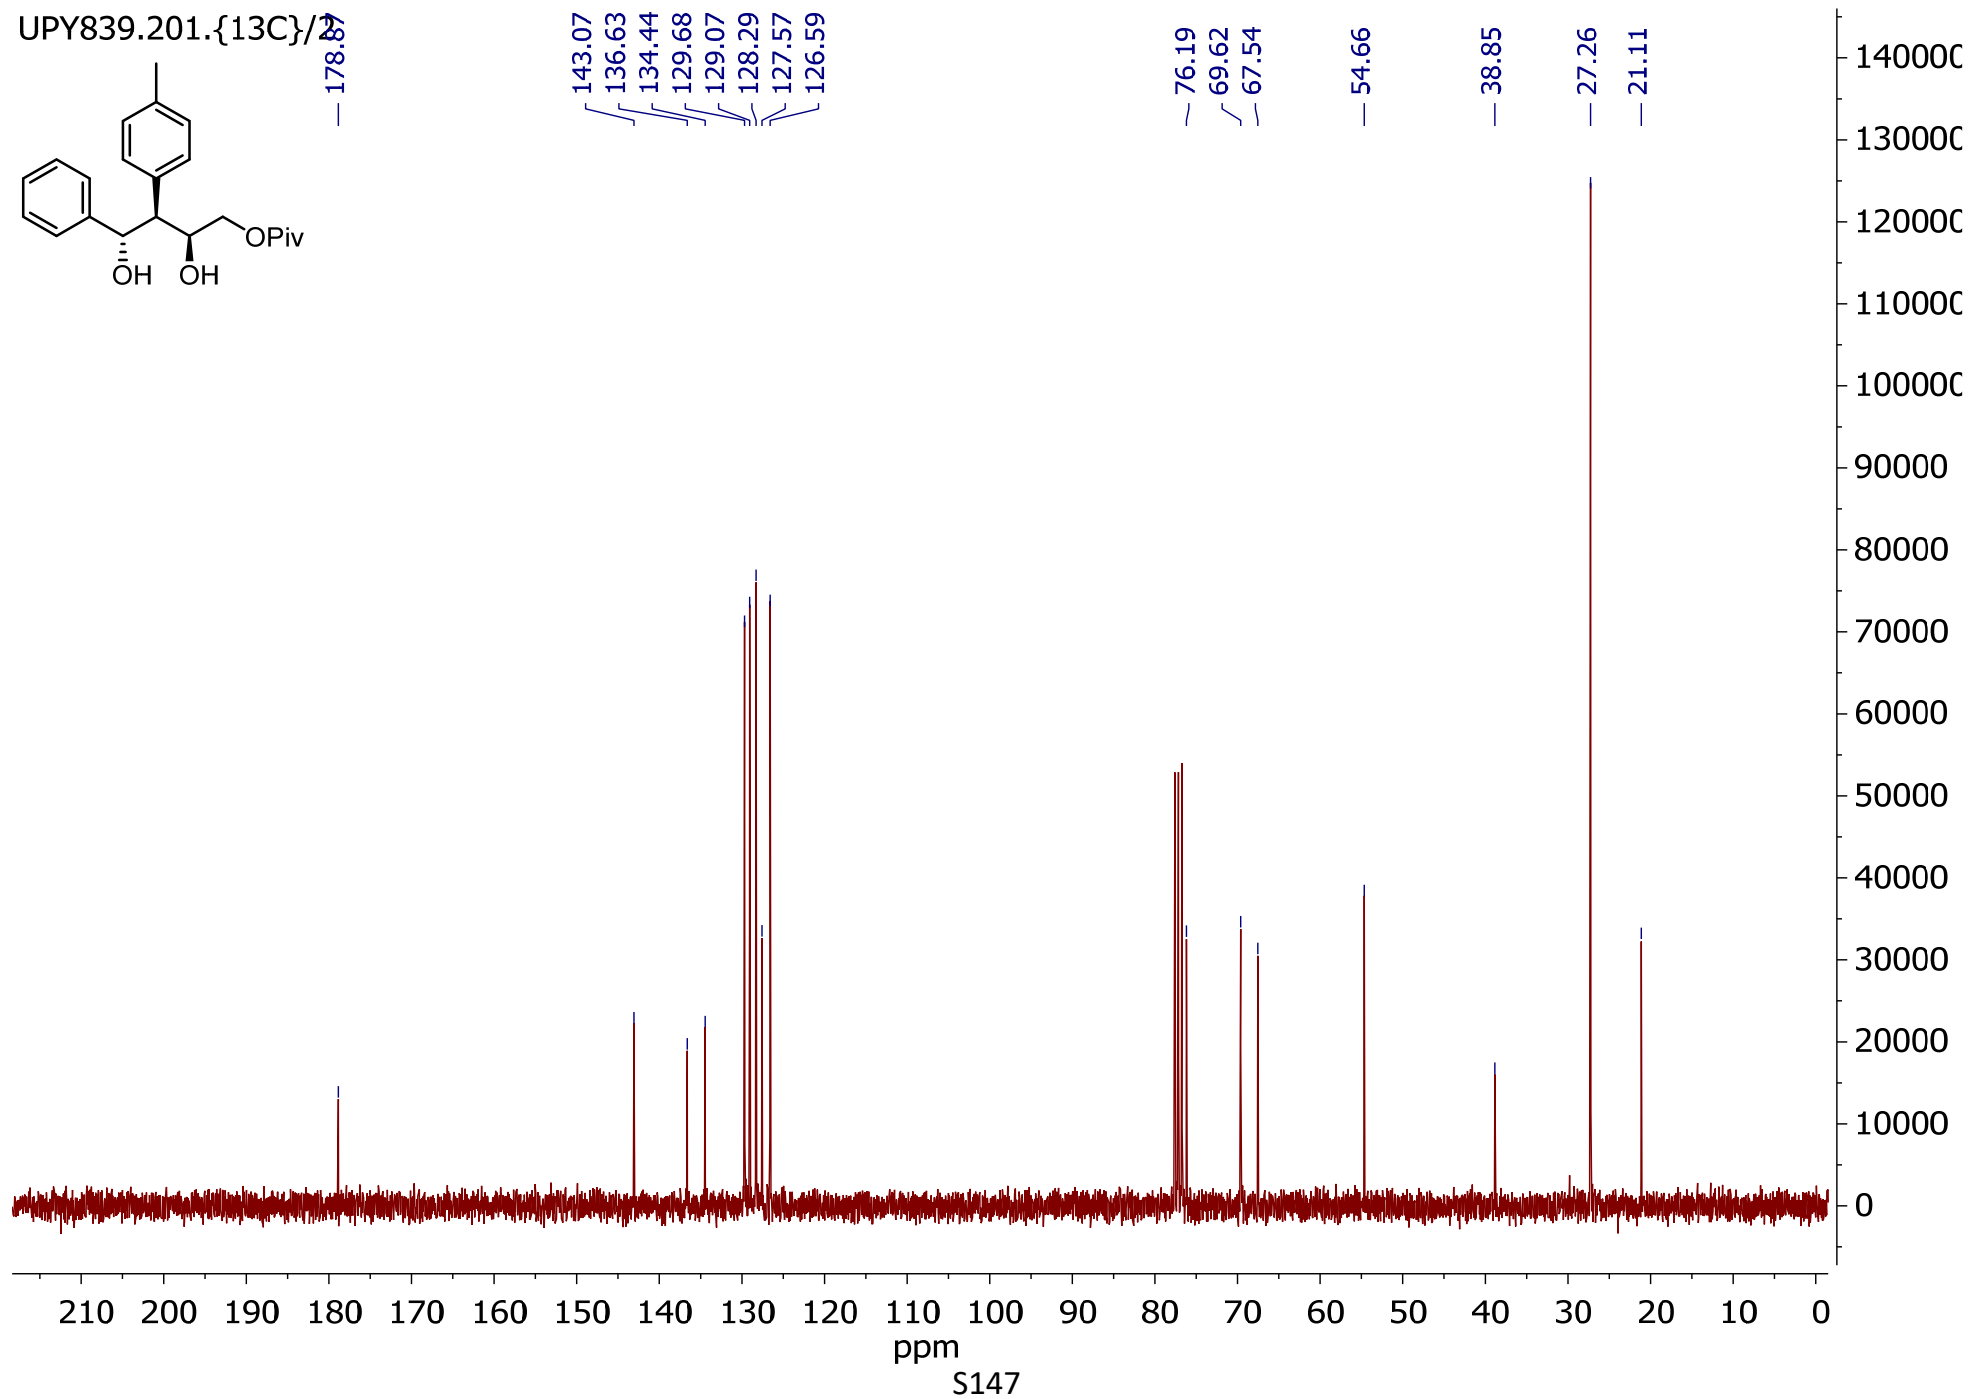

UPY839.201.{13C}deptsp135/3

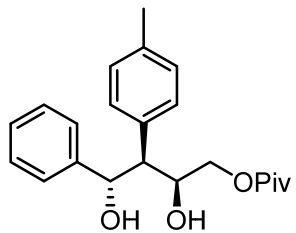

129.68  
129.06  
128.29  
127.57  
126.58

76.19  
69.62  
67.53

54.66

27.25

21.11

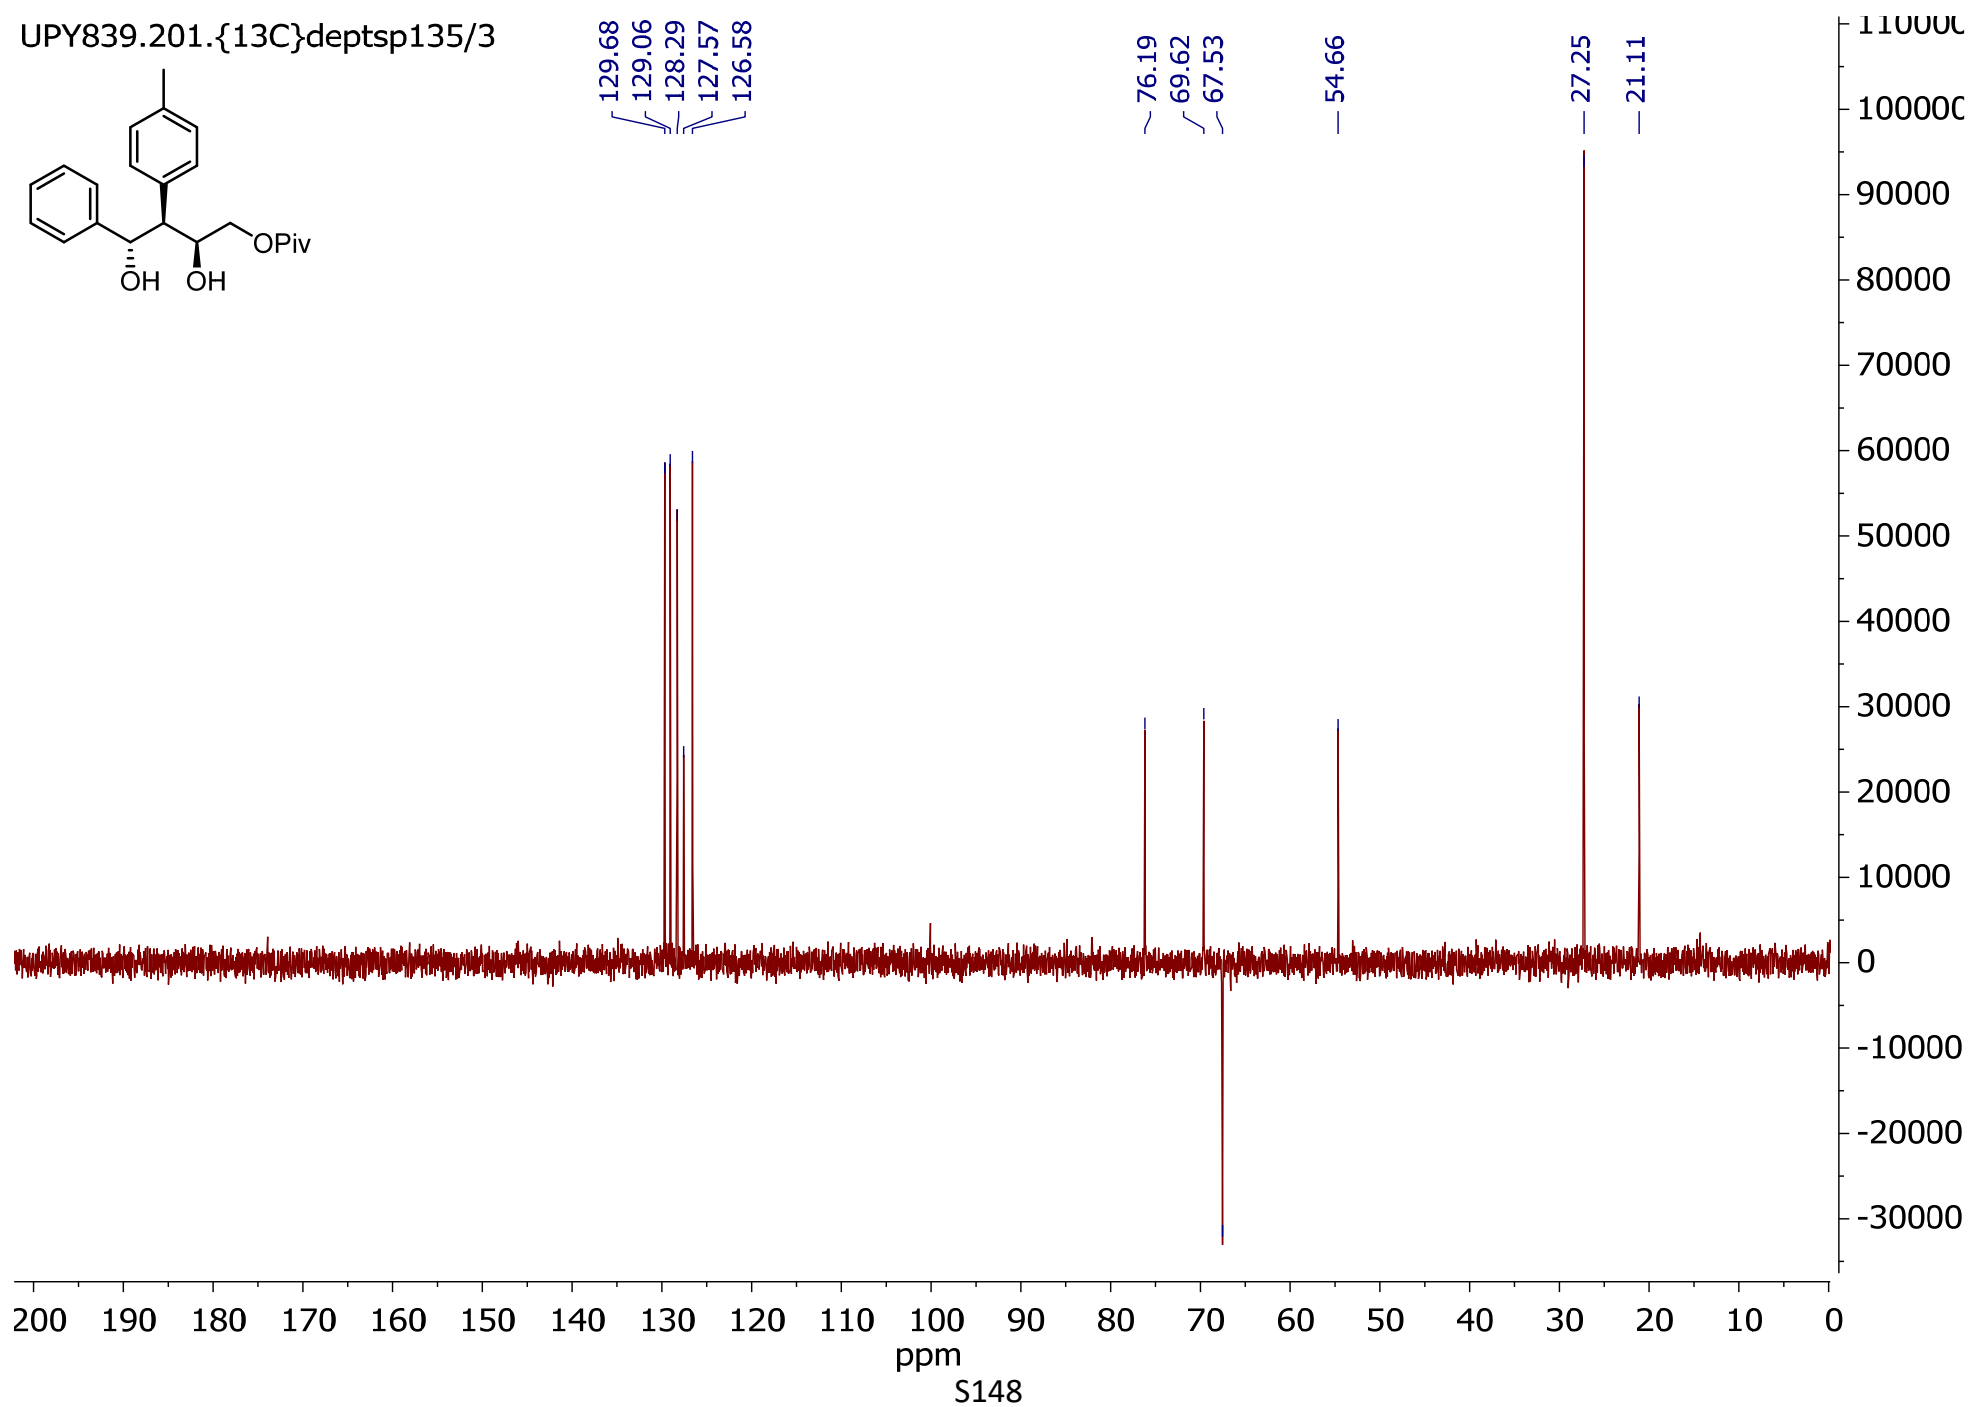

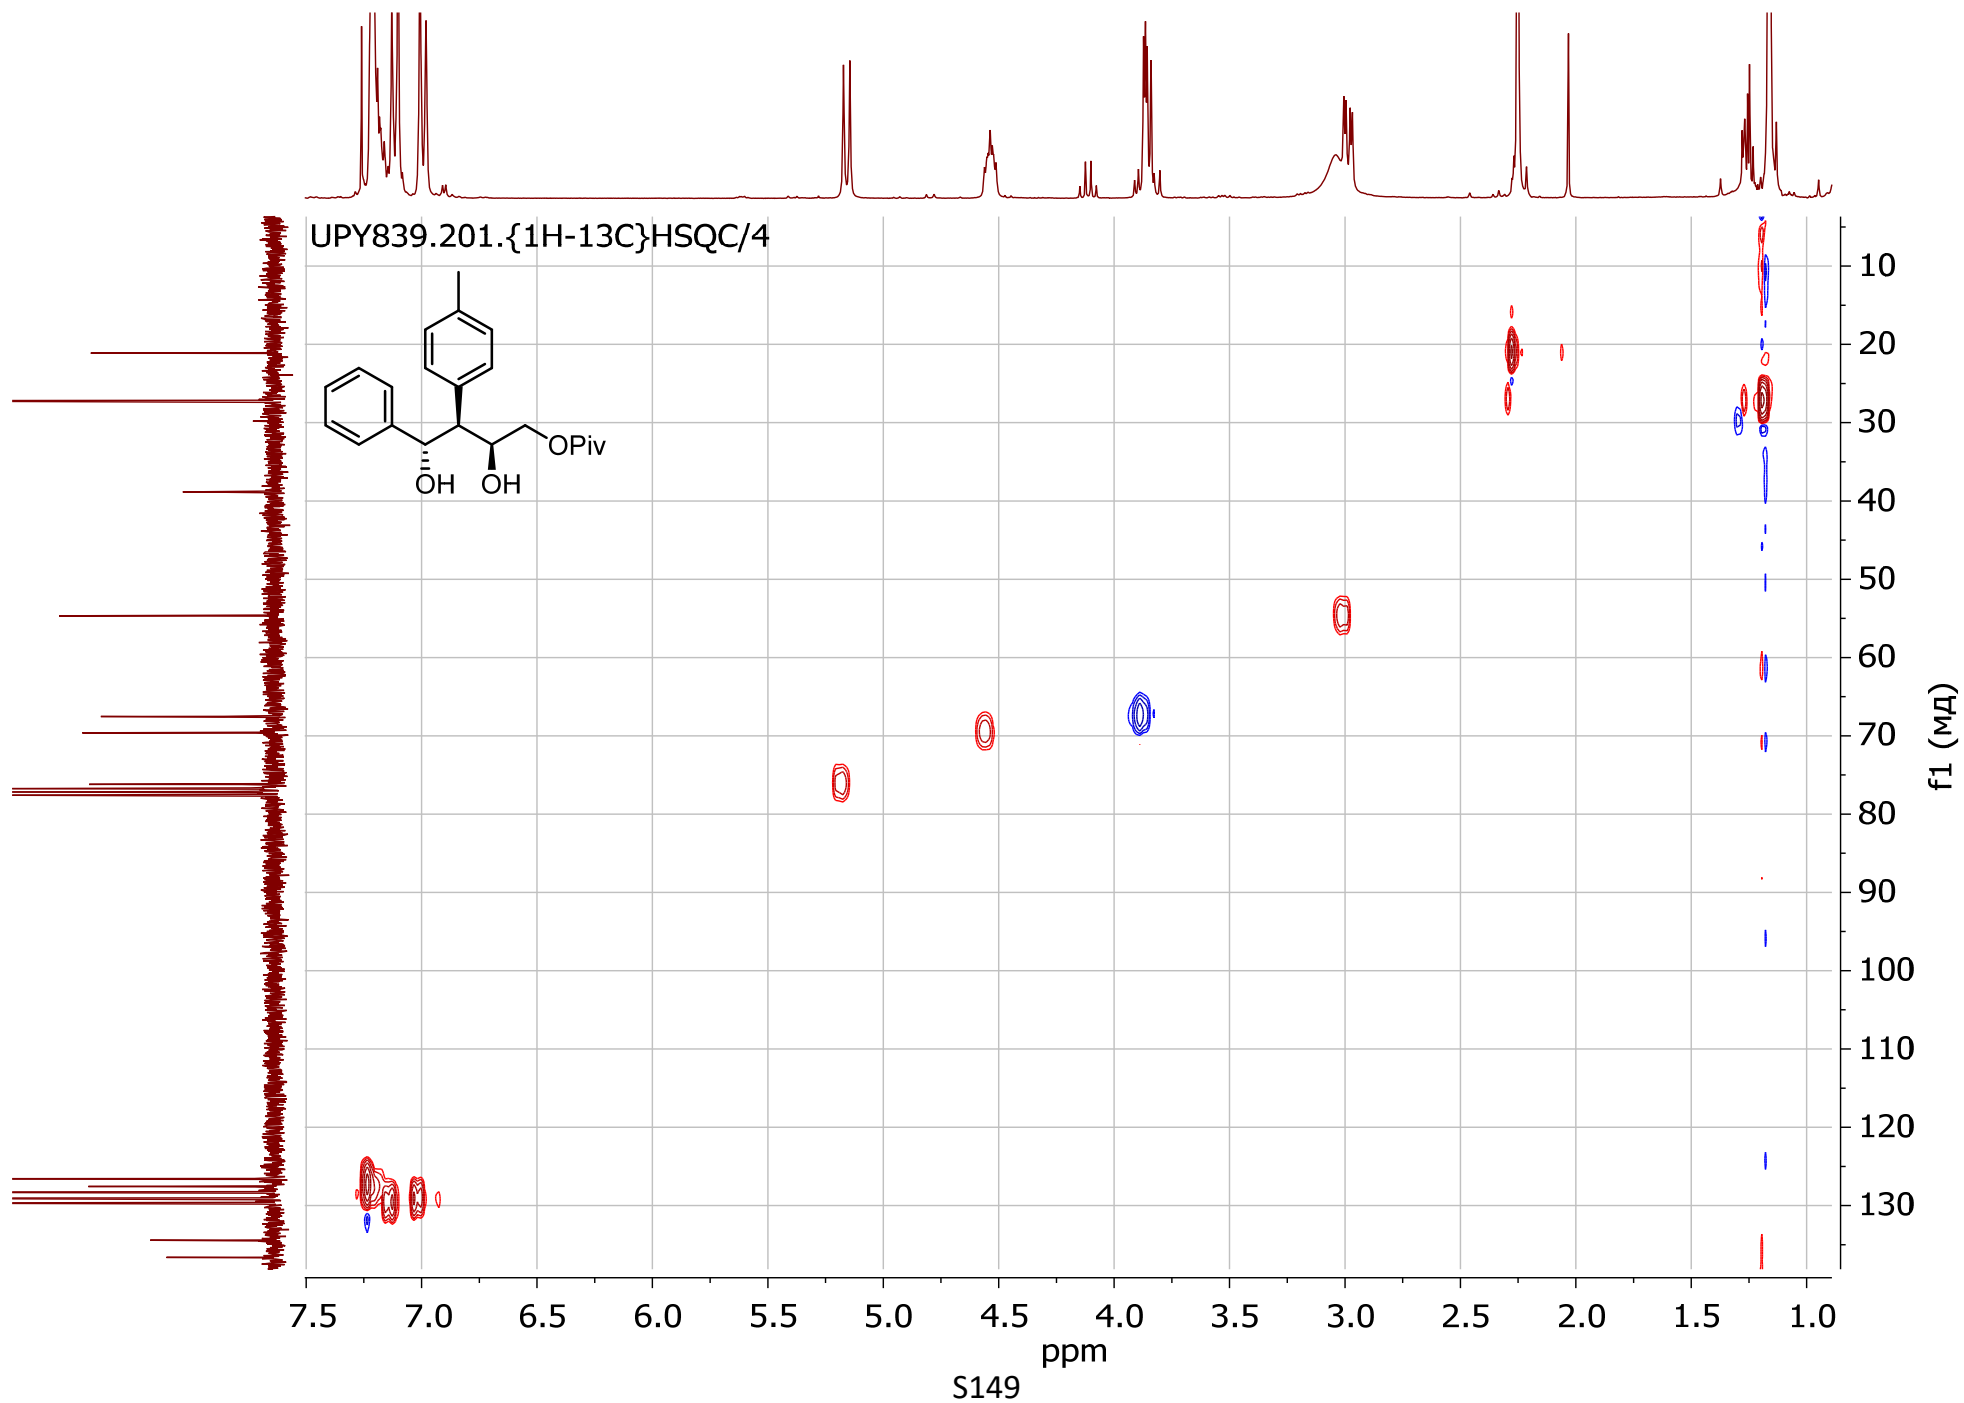

# NMR spectra of 21

UPY864.100.{1H}/1

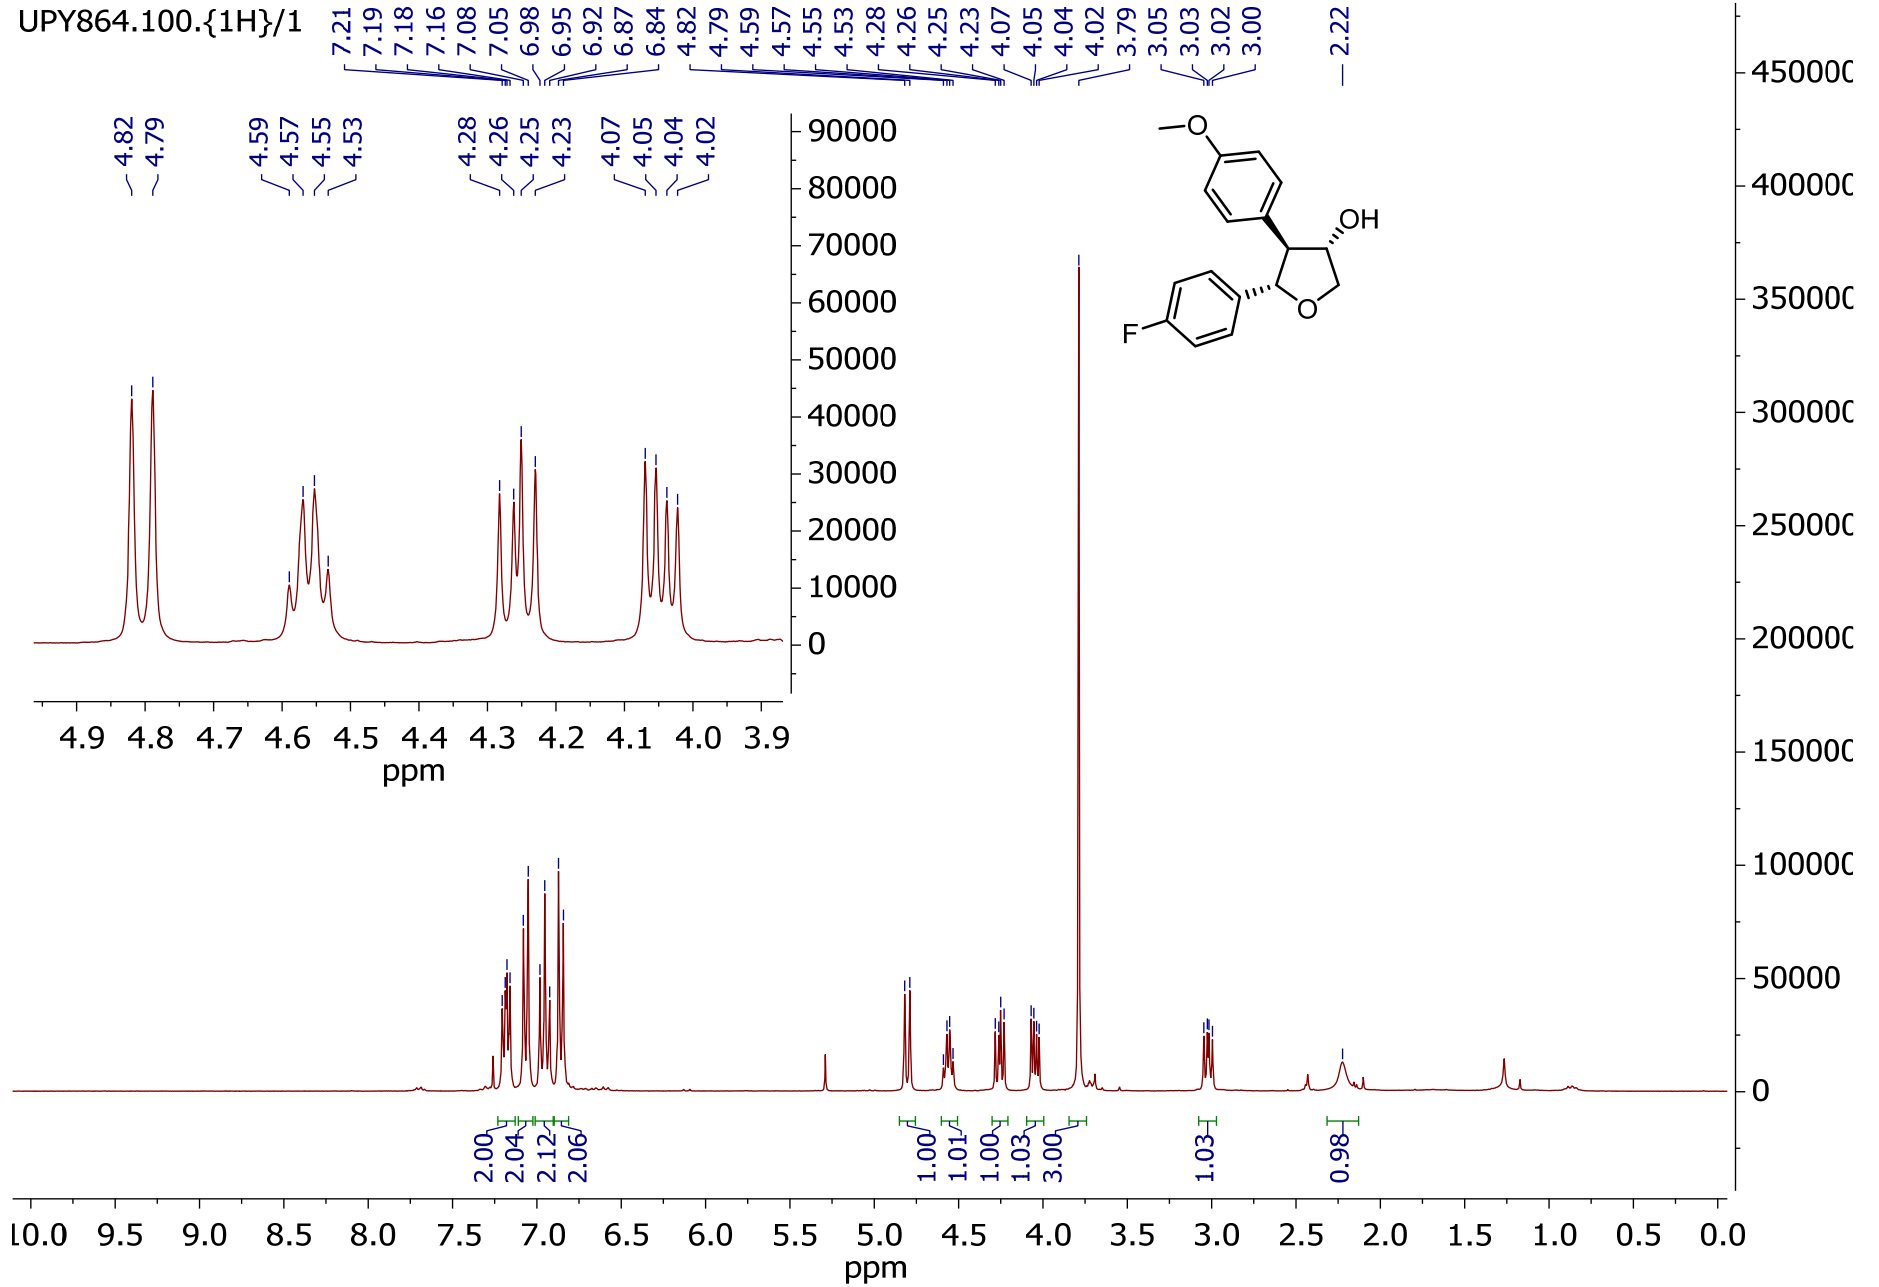

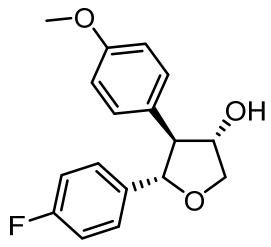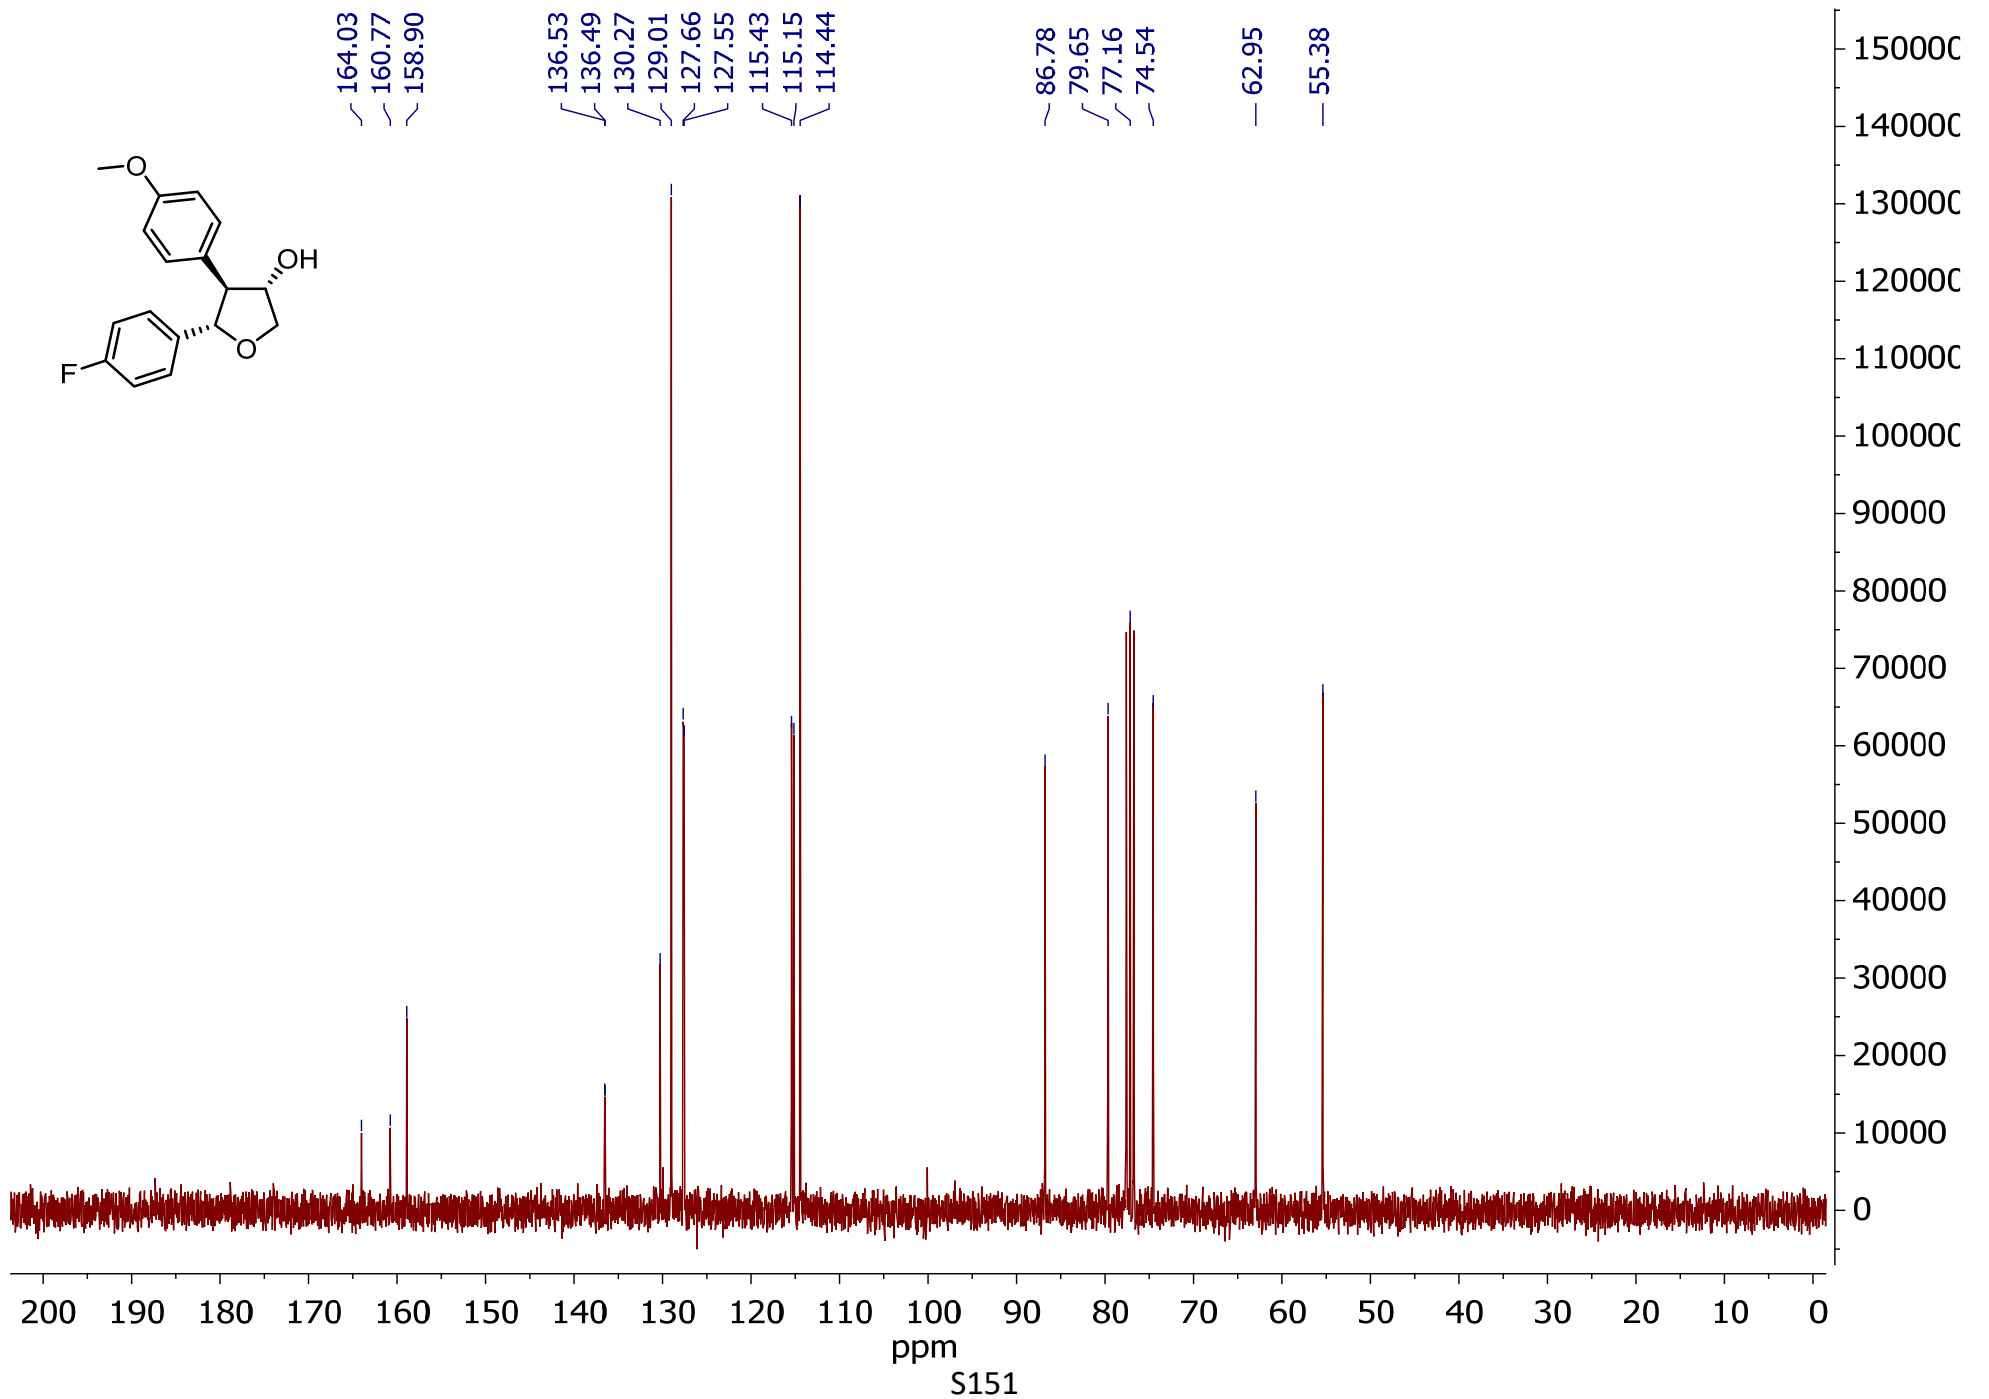

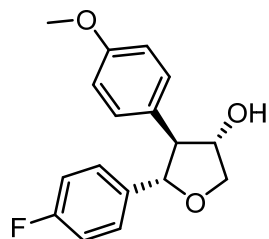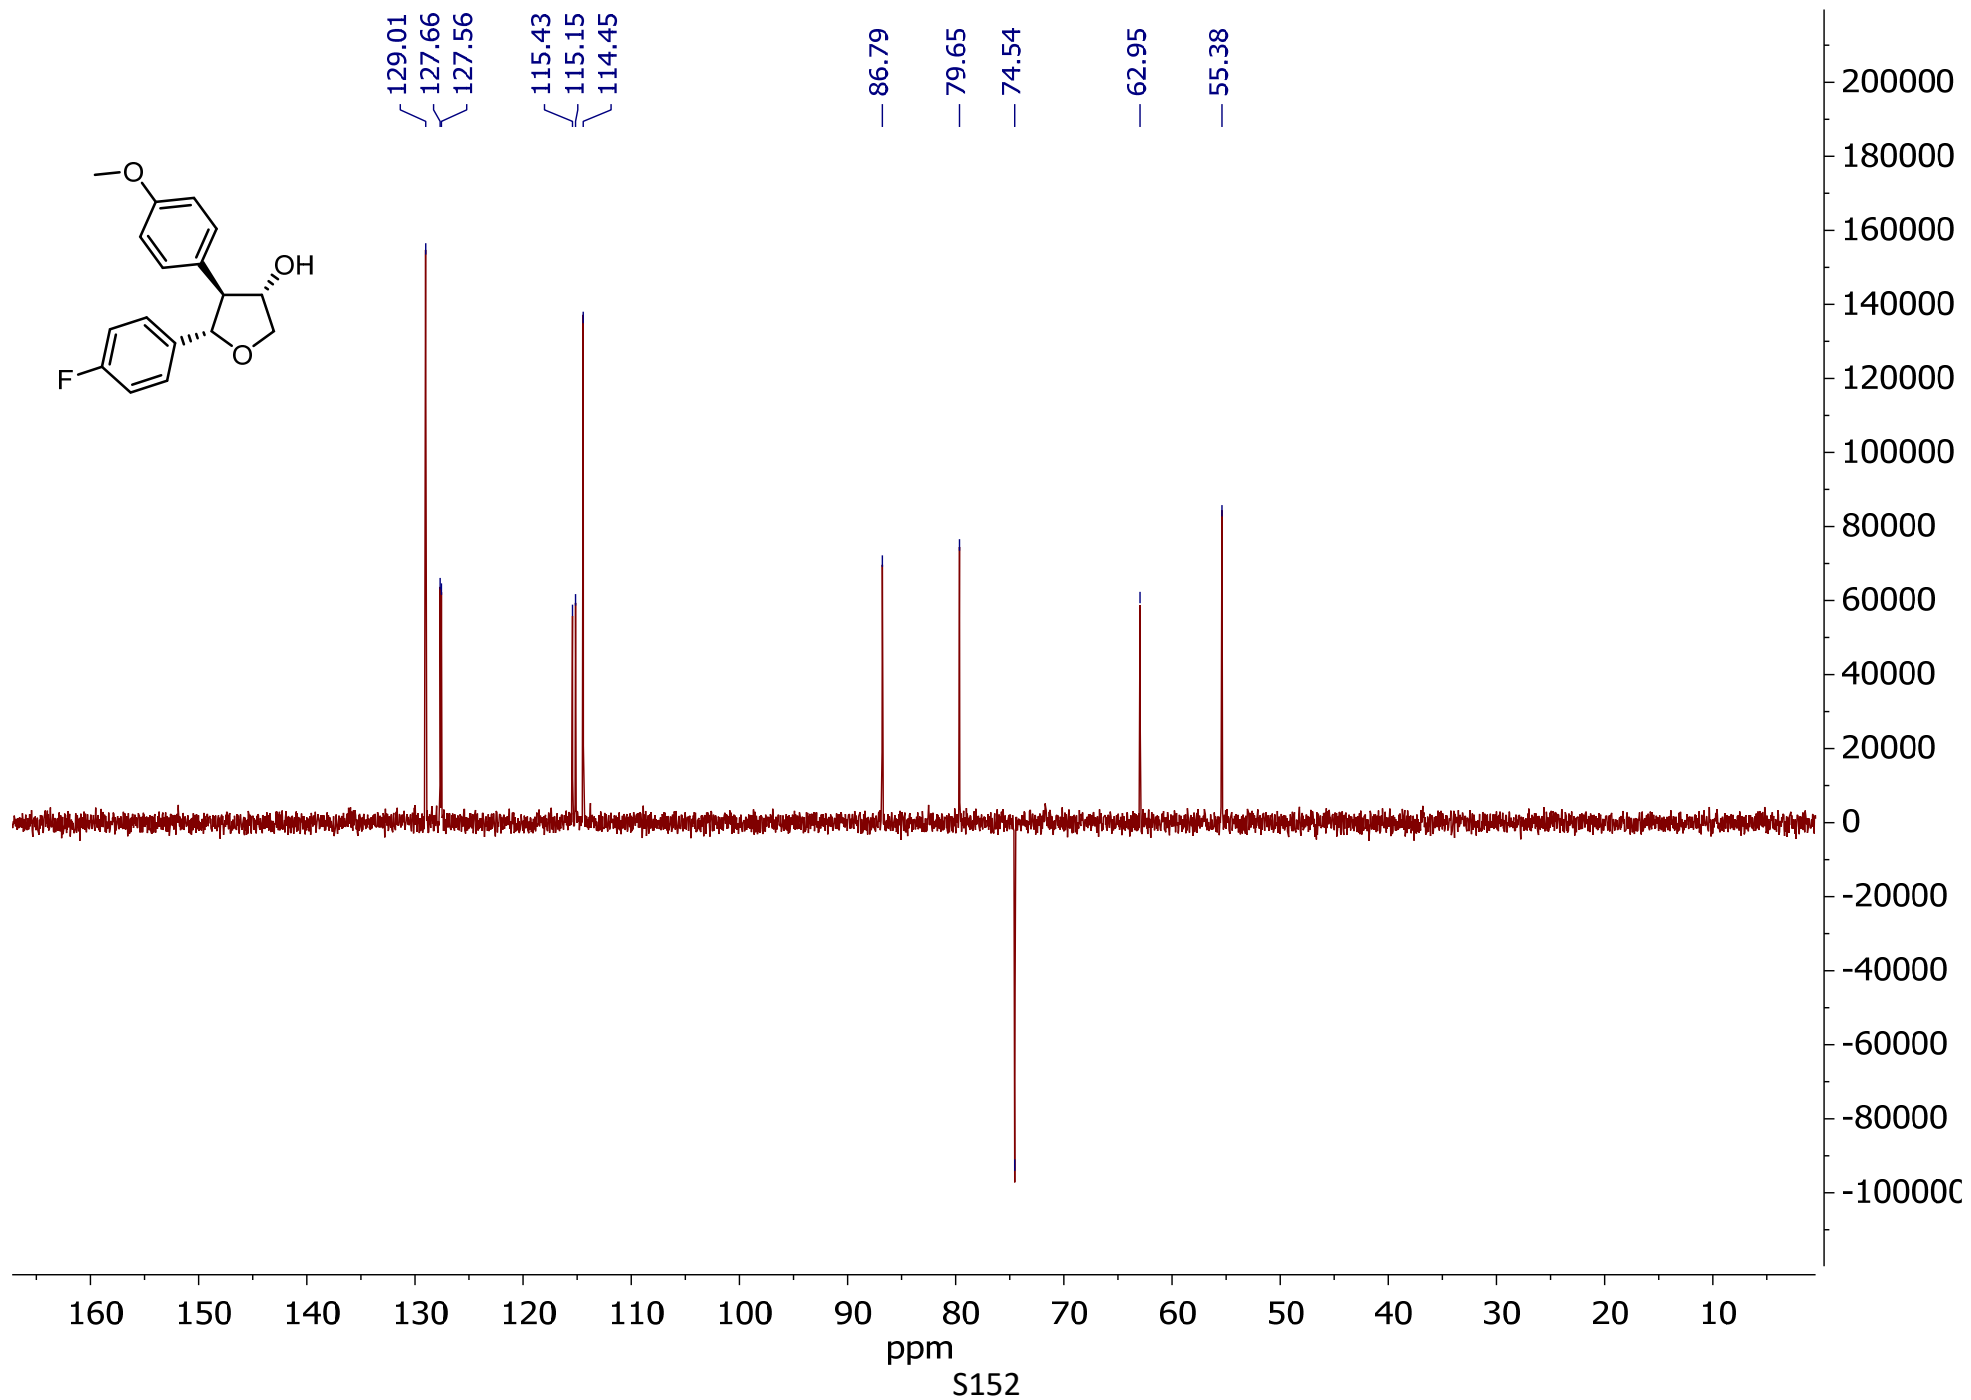



UPY864.100.{19F}INVGATED/5

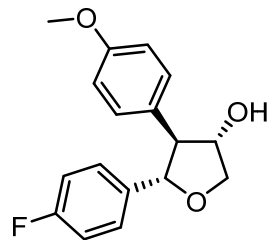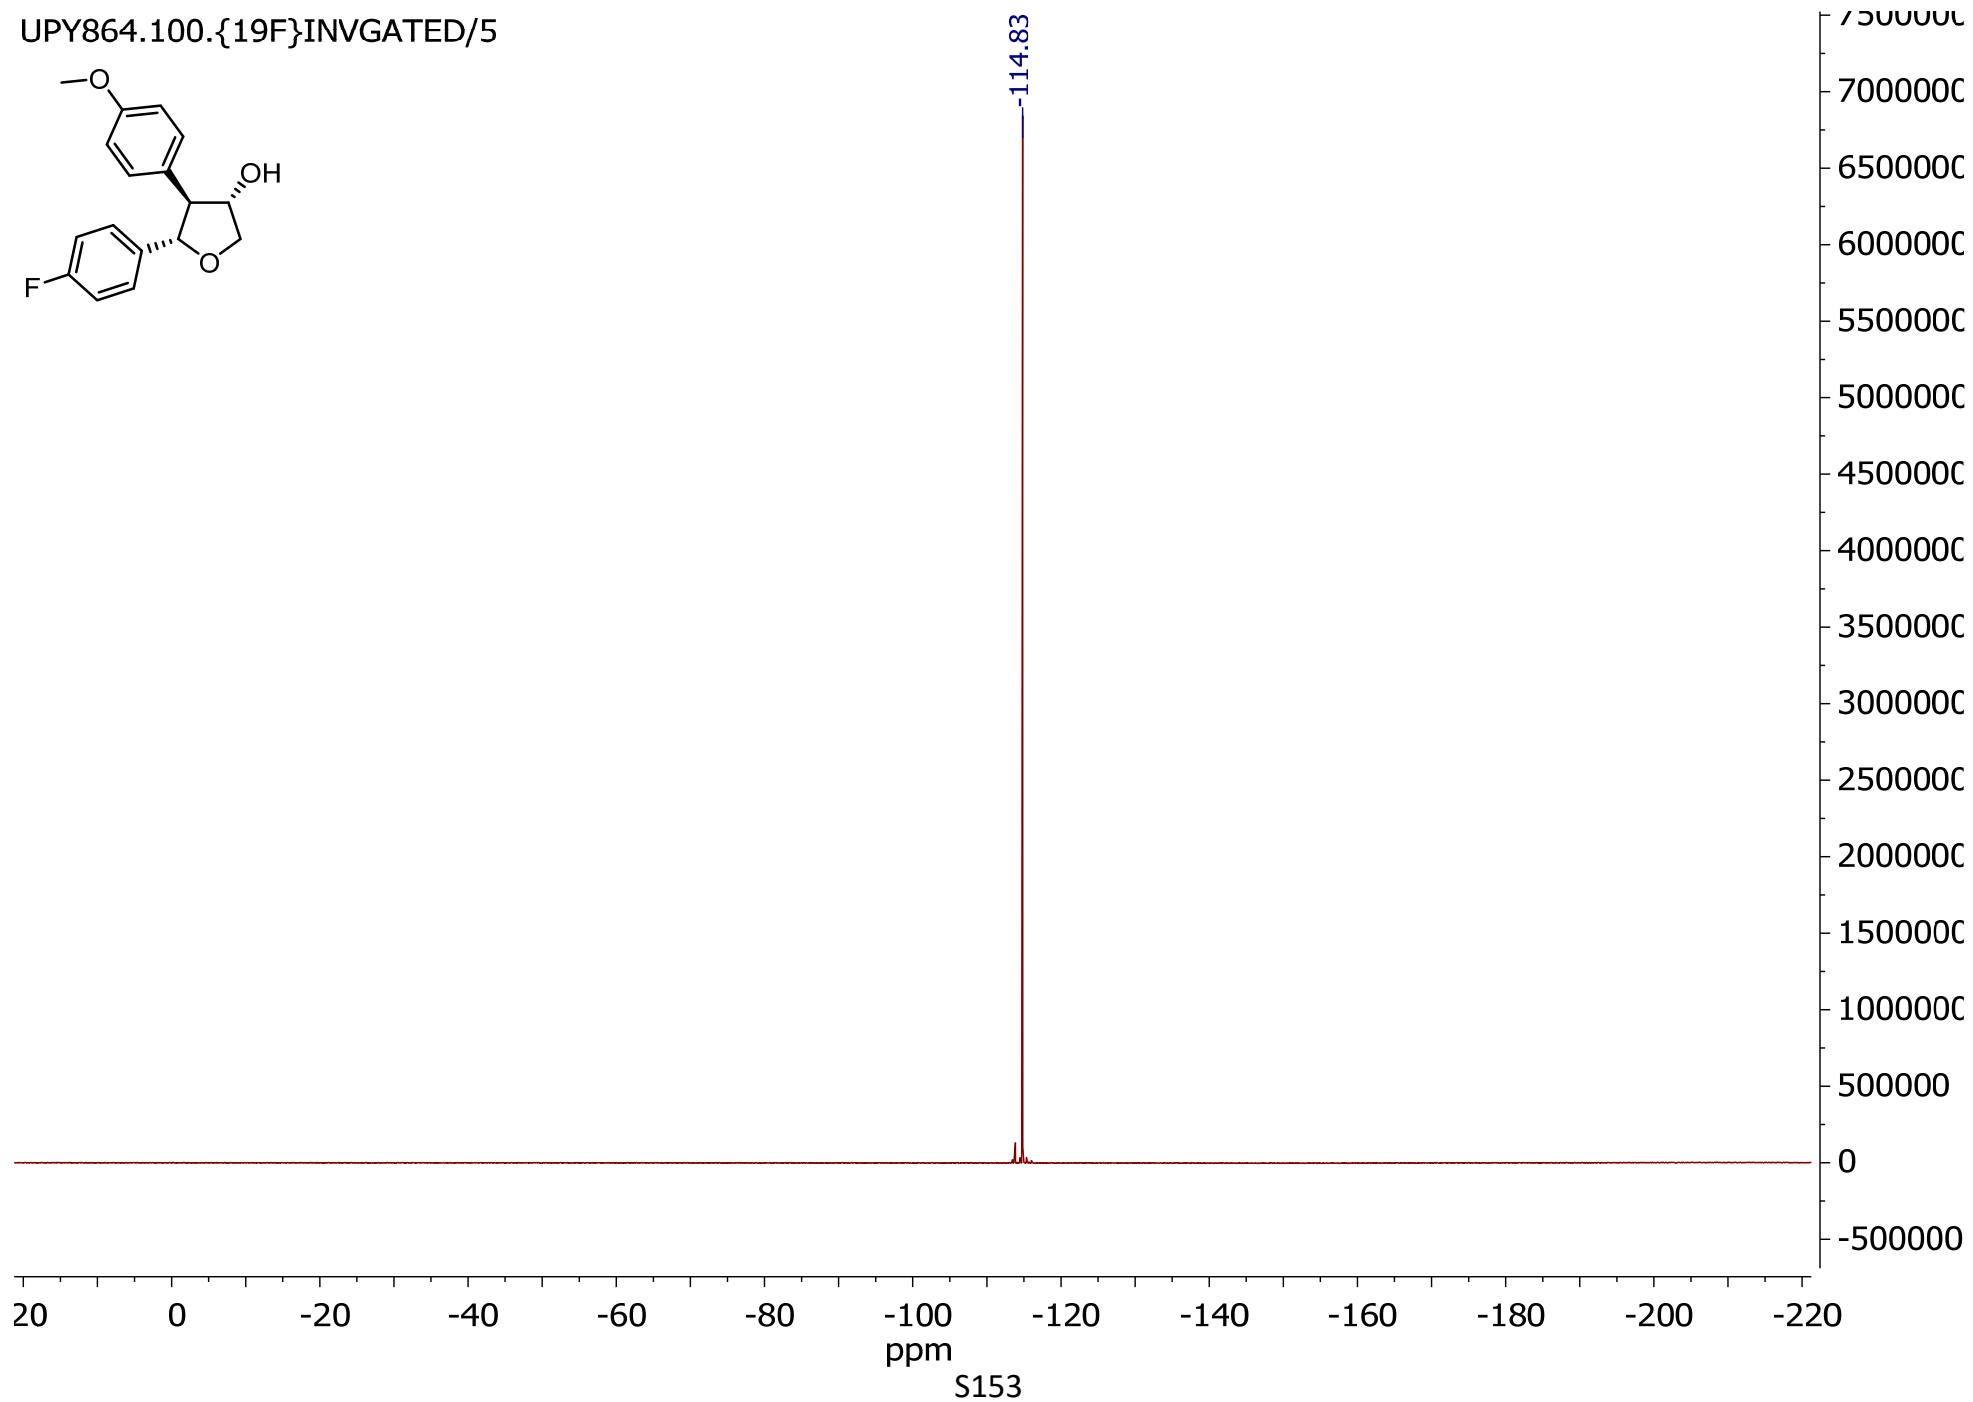

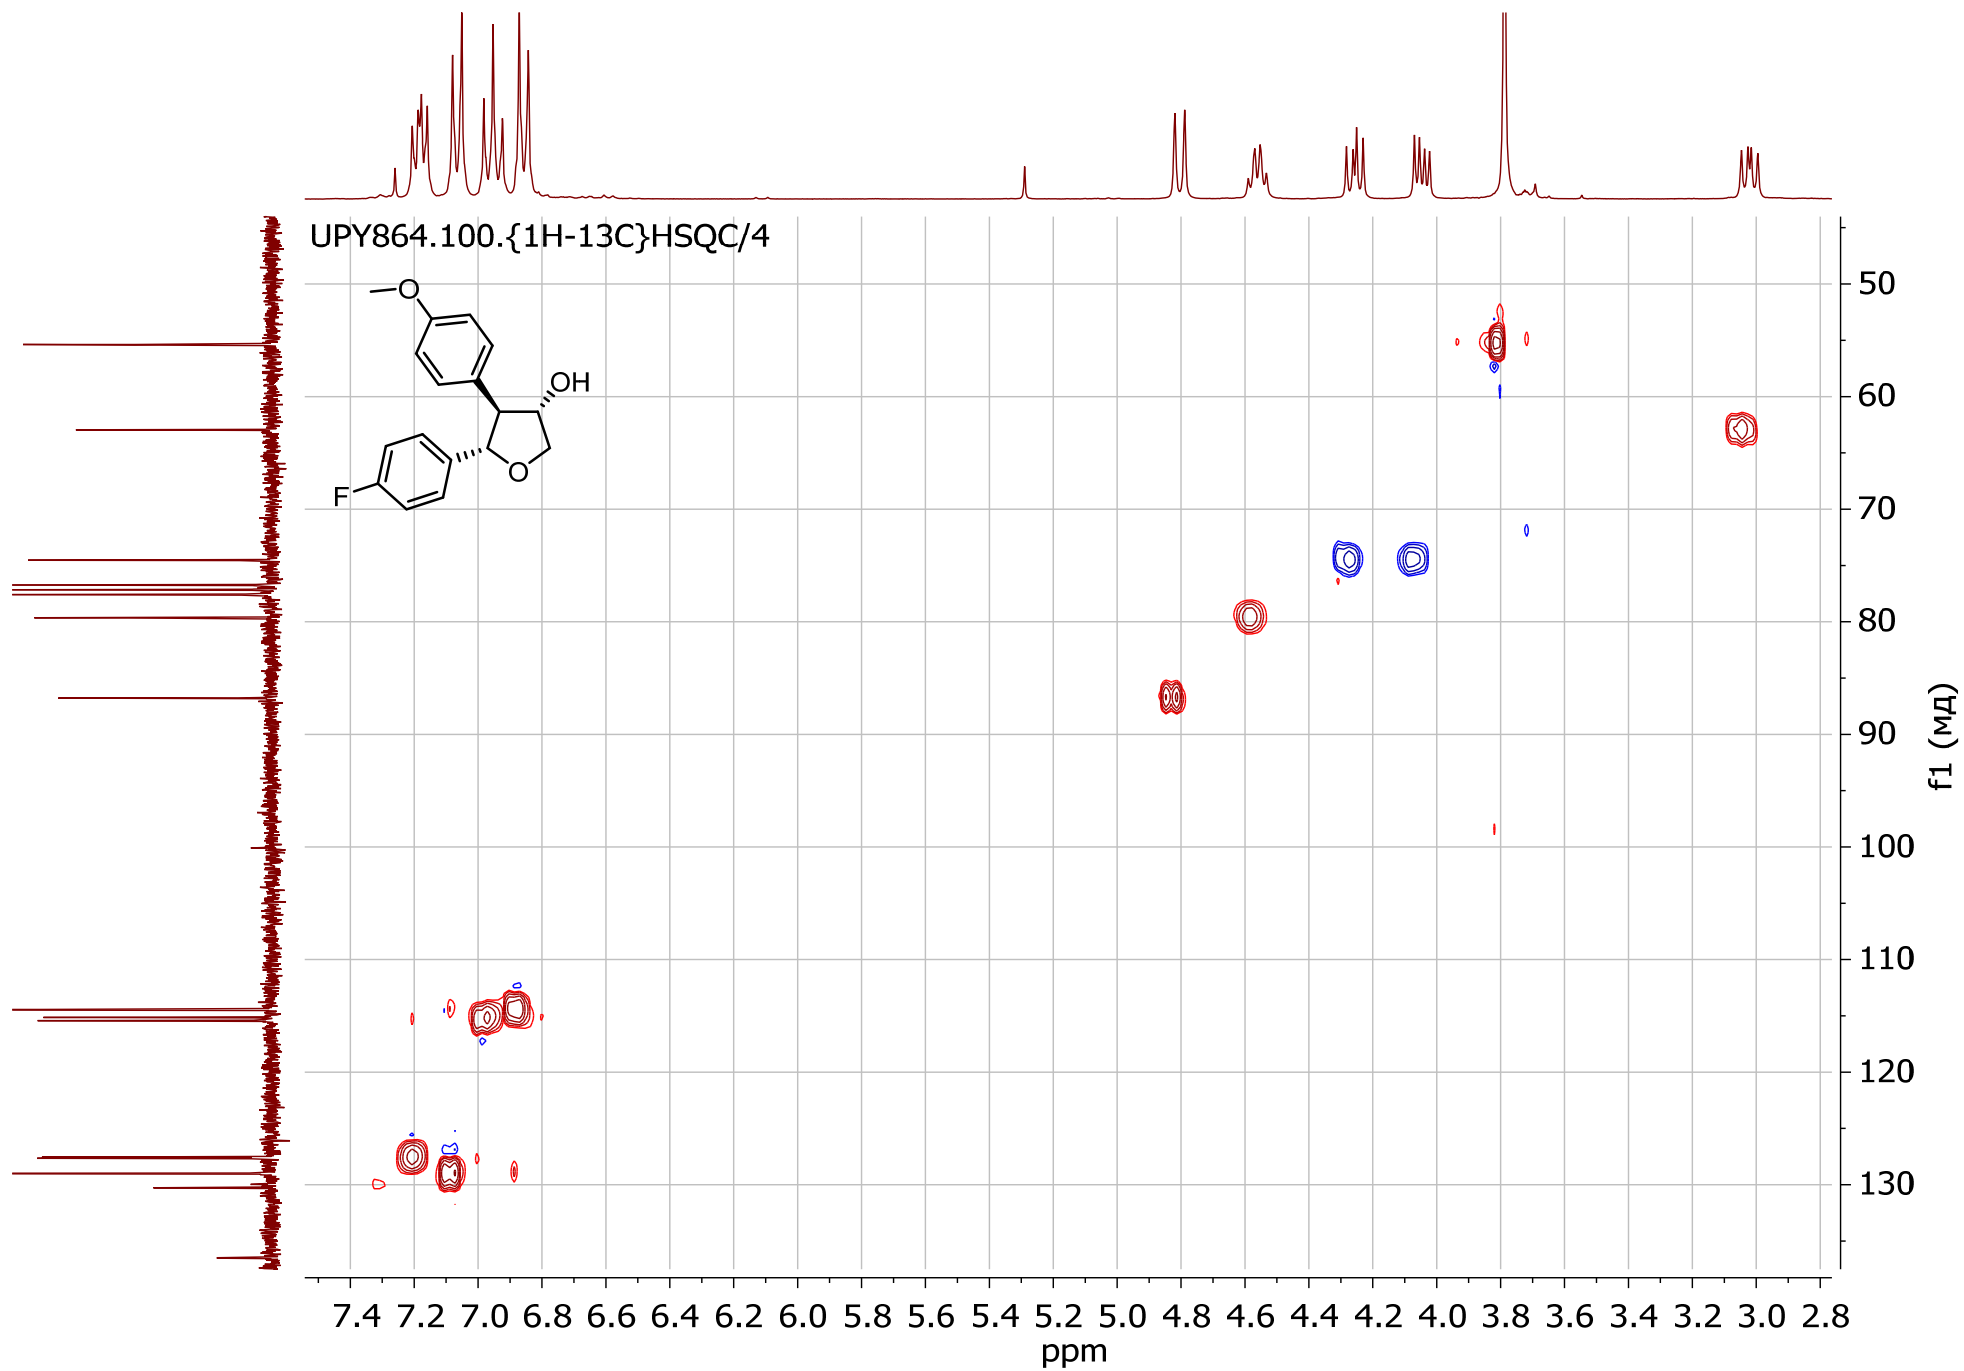

S154

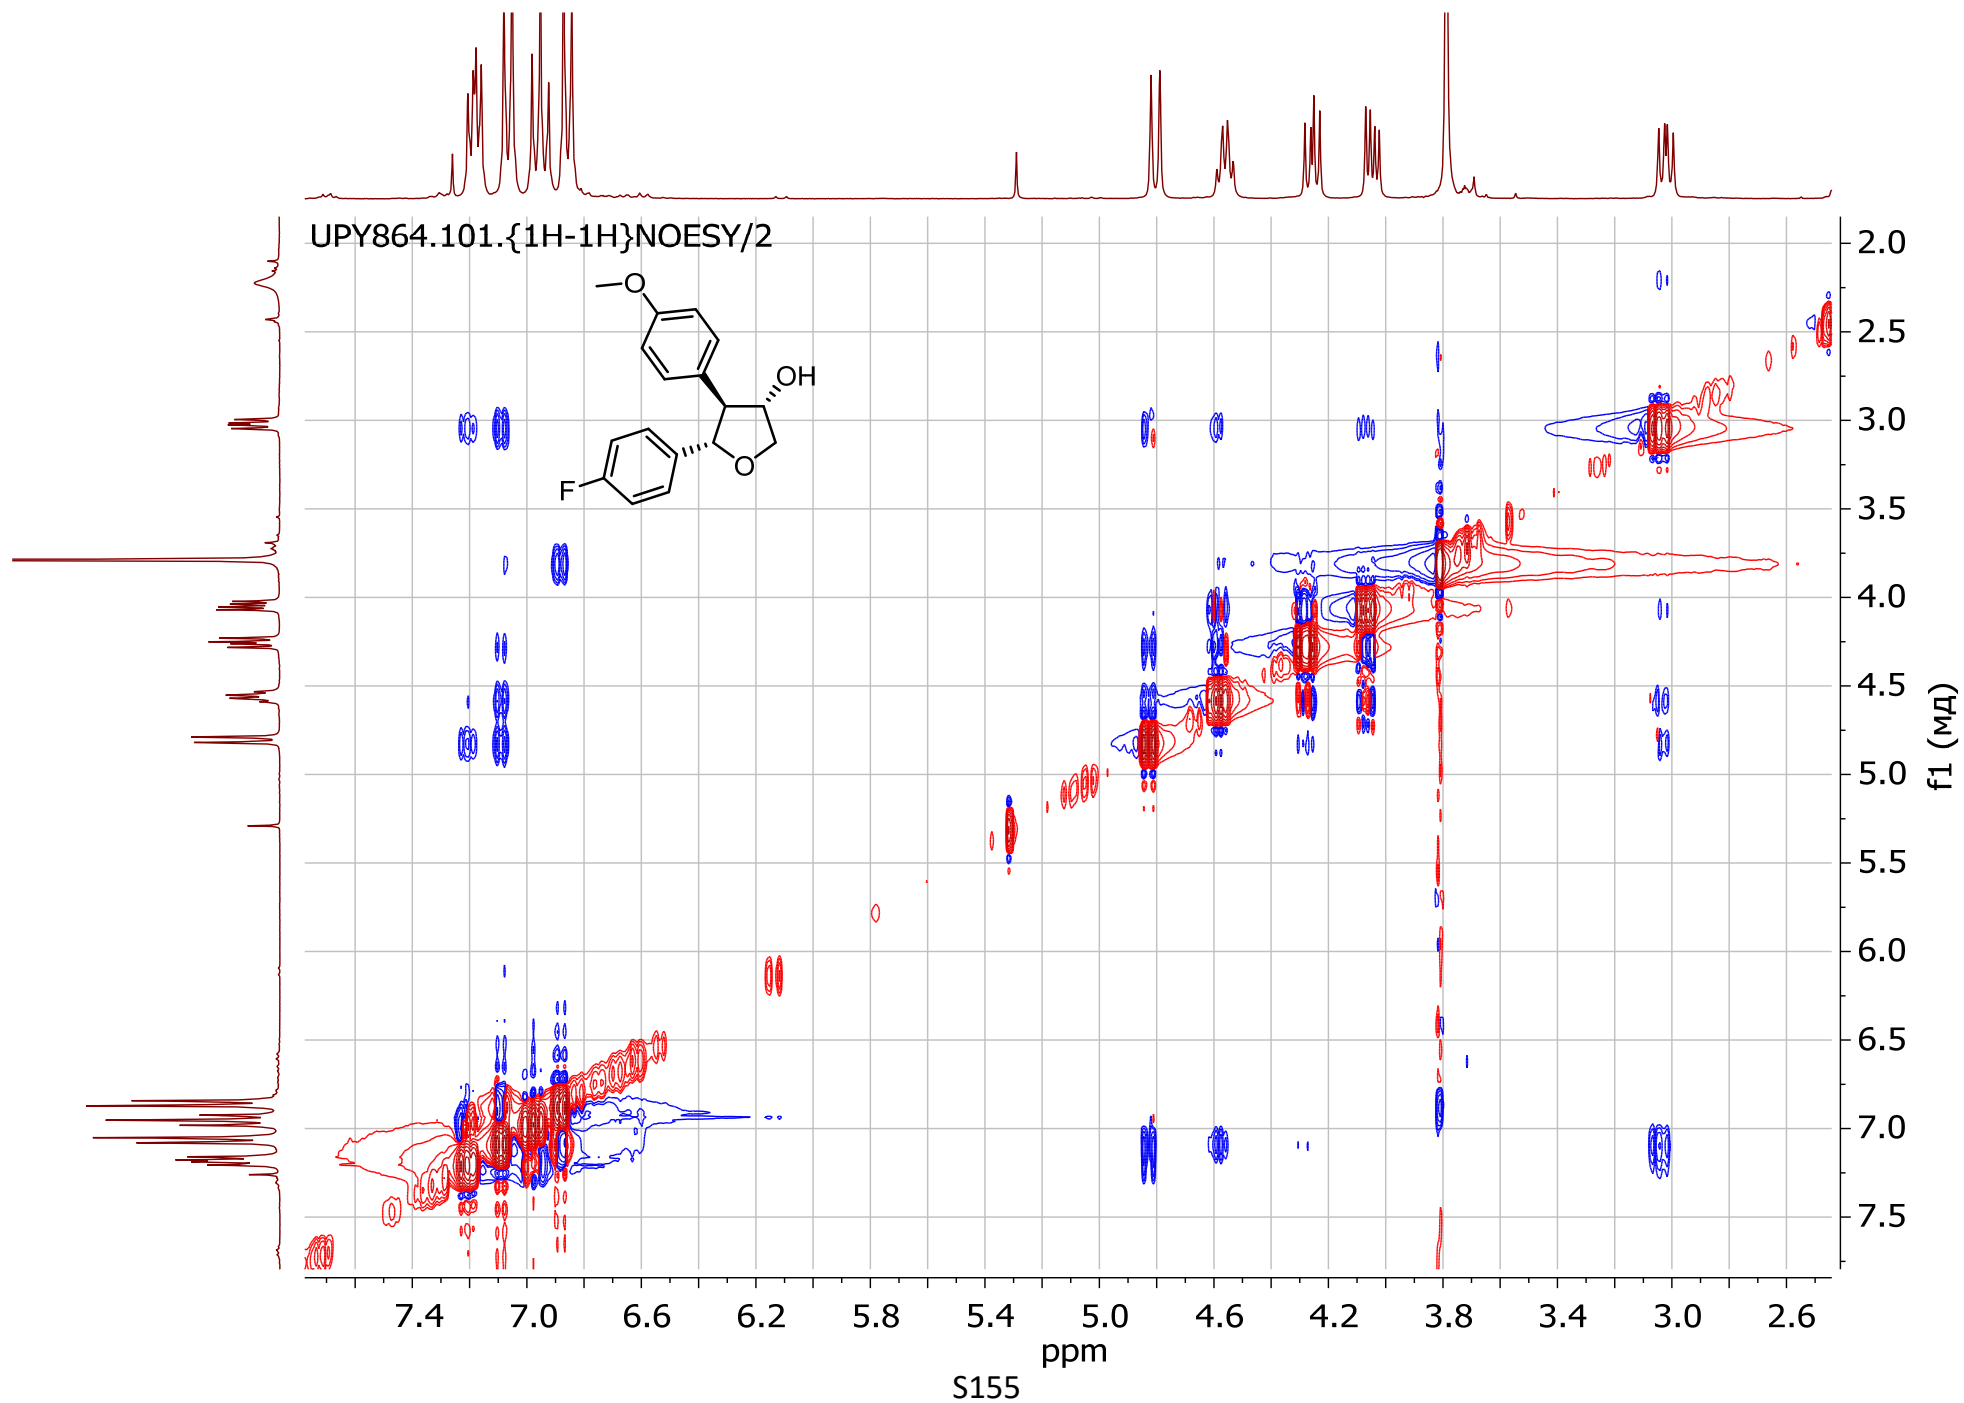

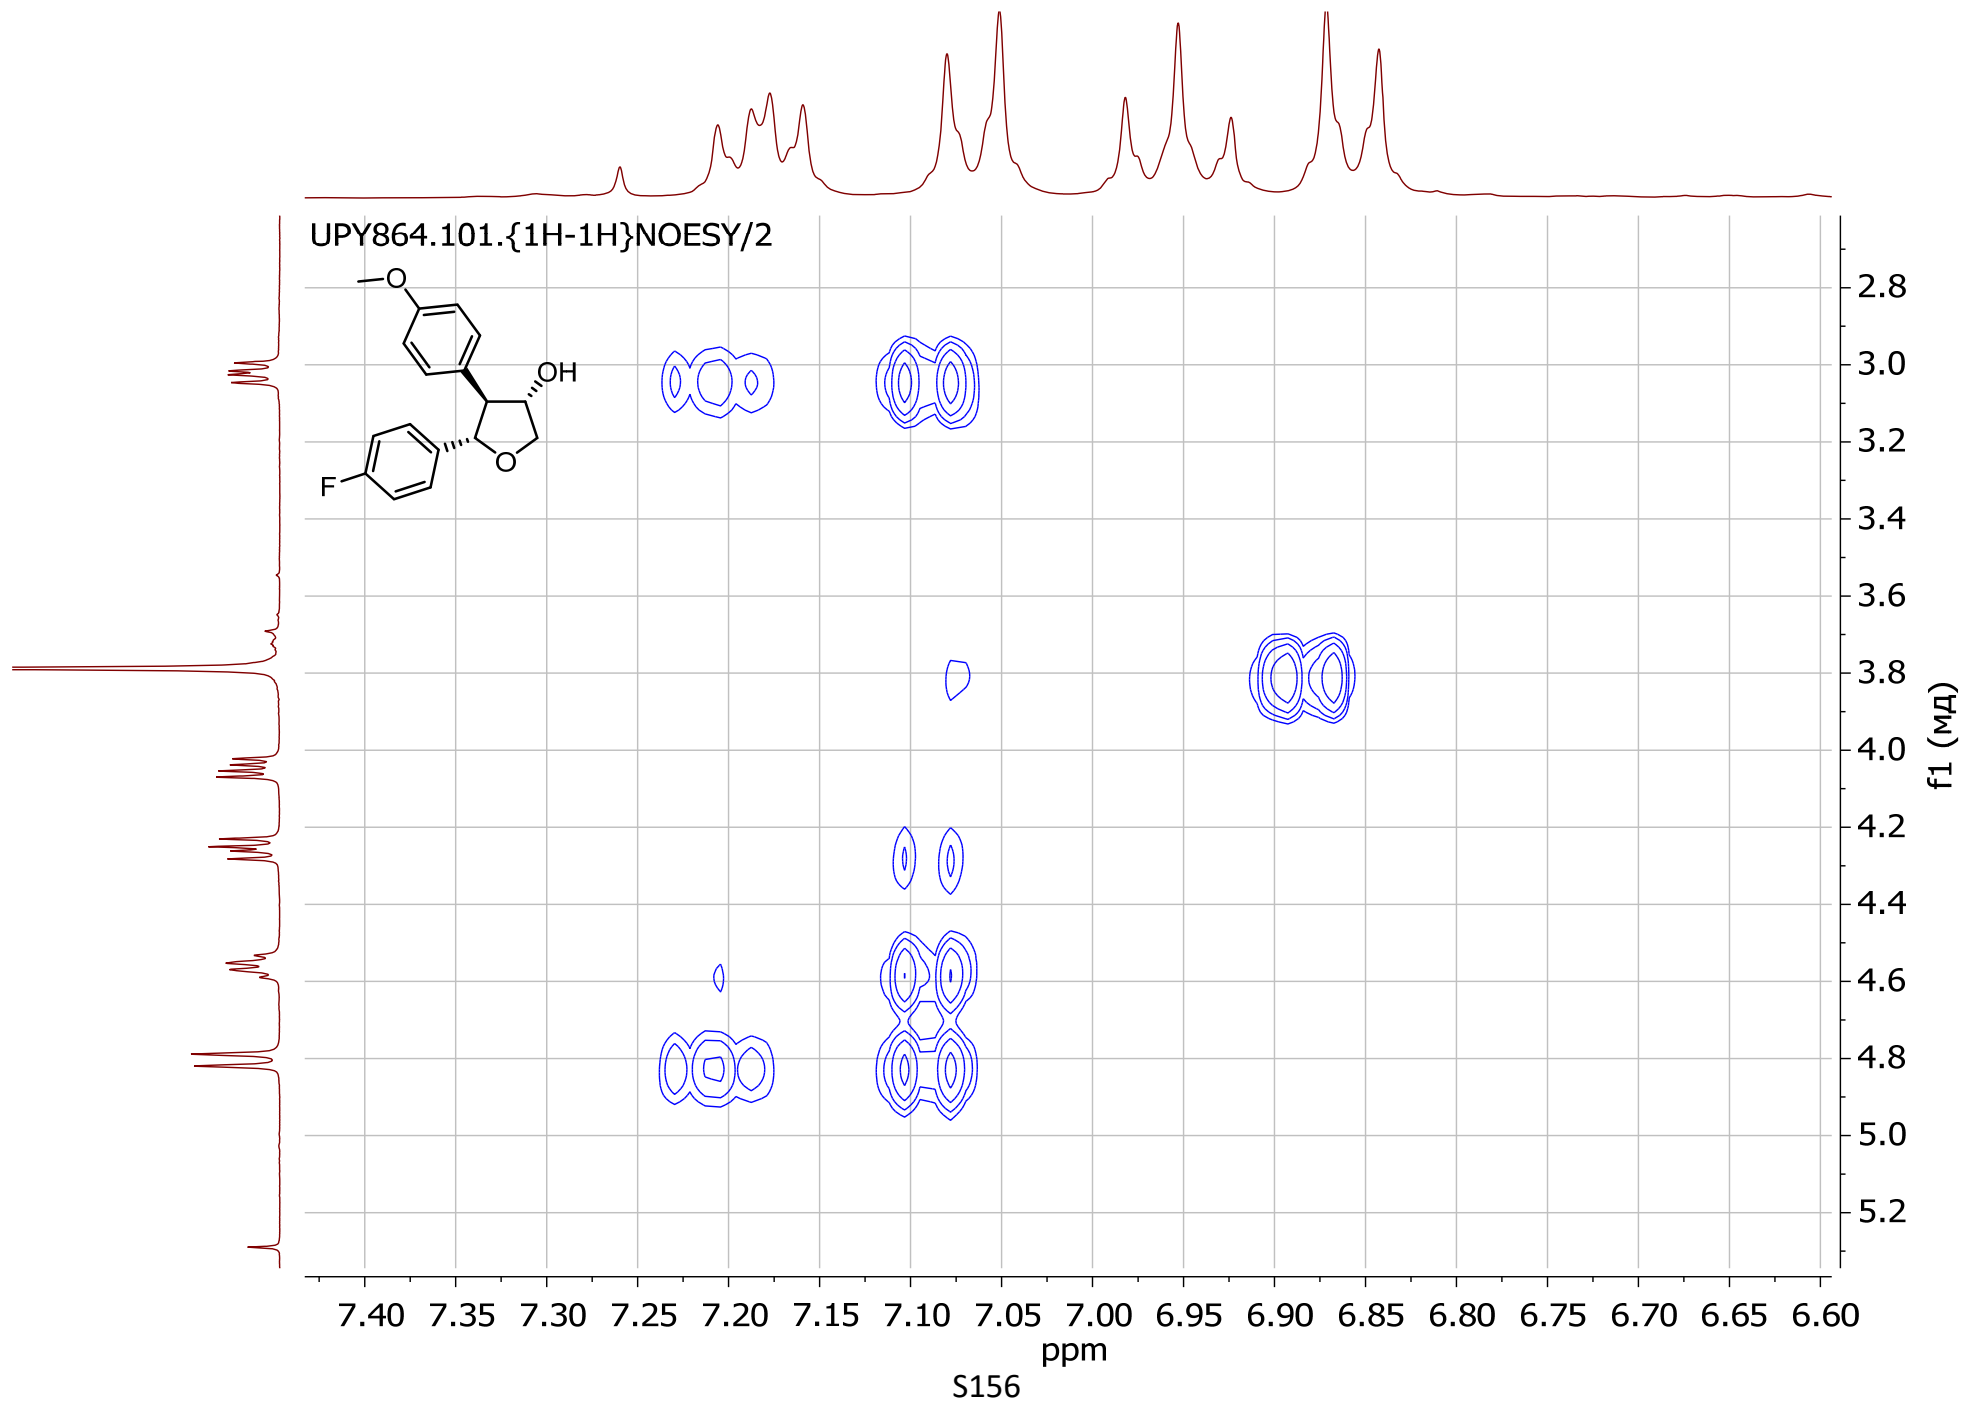

UPY864.101.{1H-1H}NOESY/2

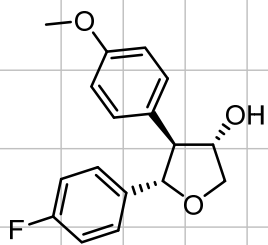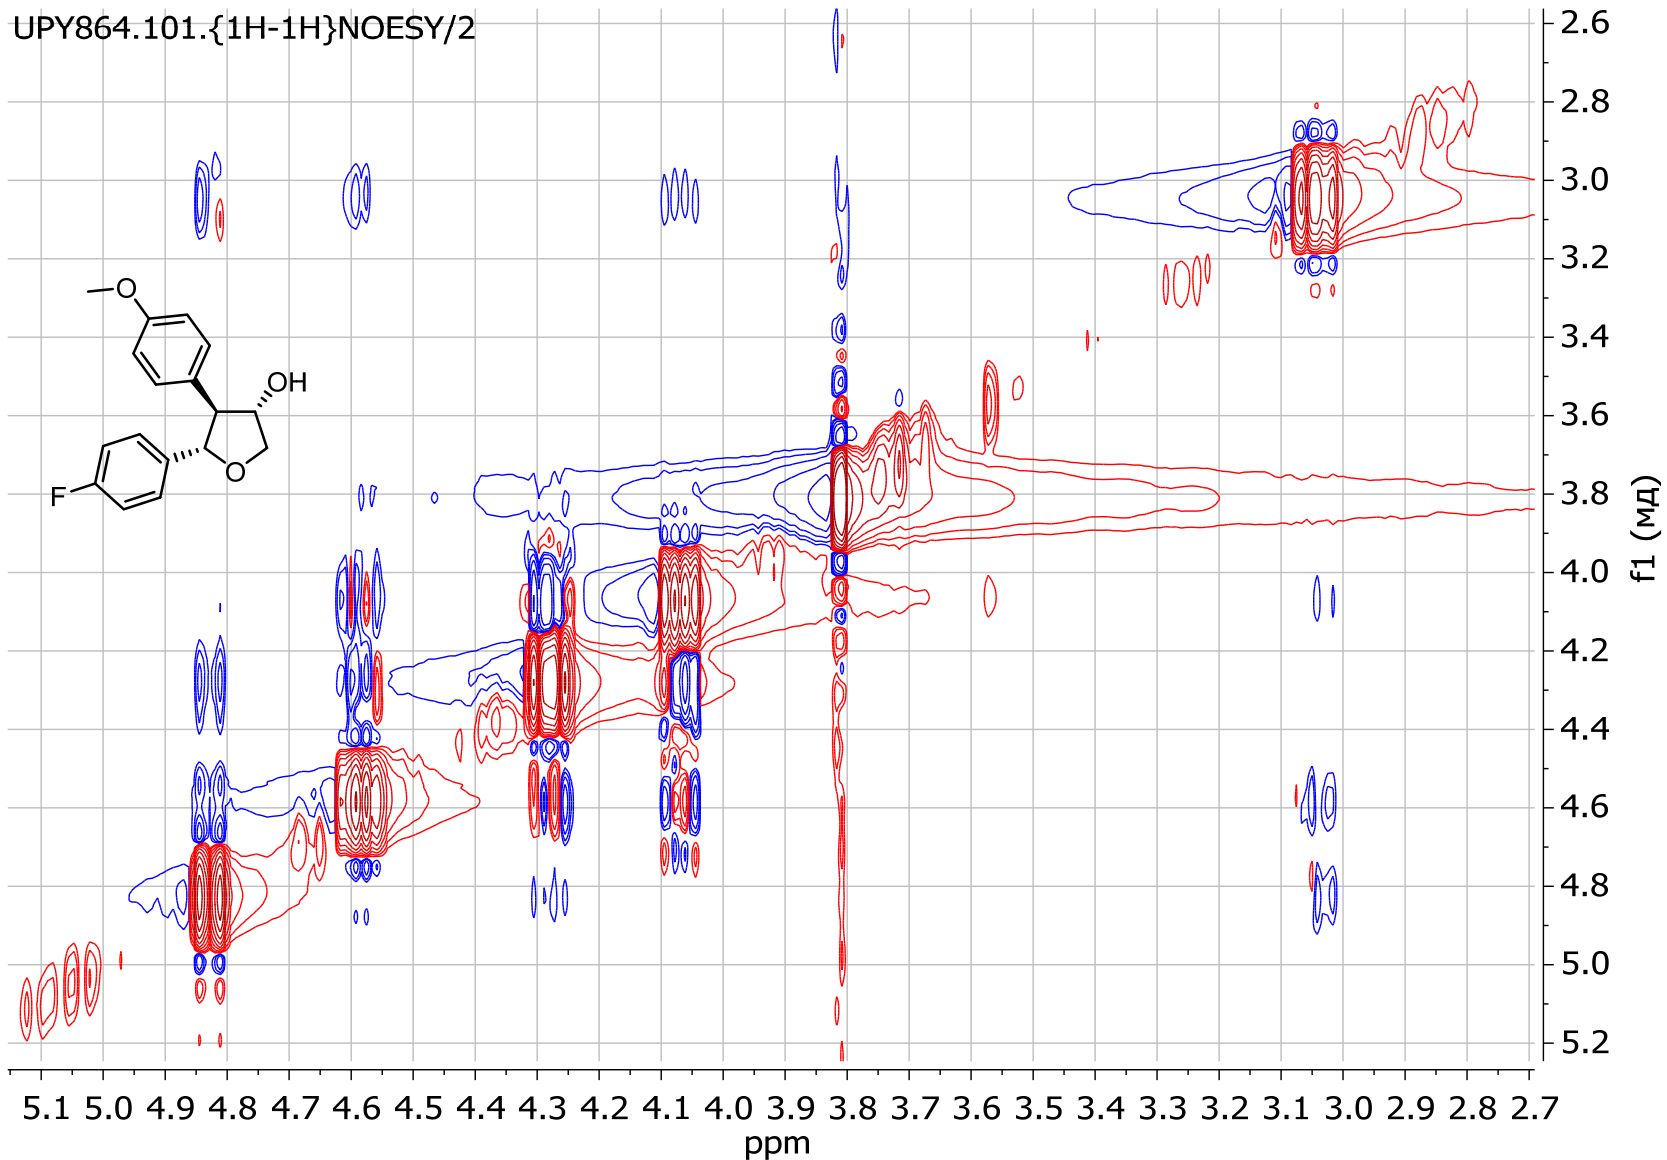

S157

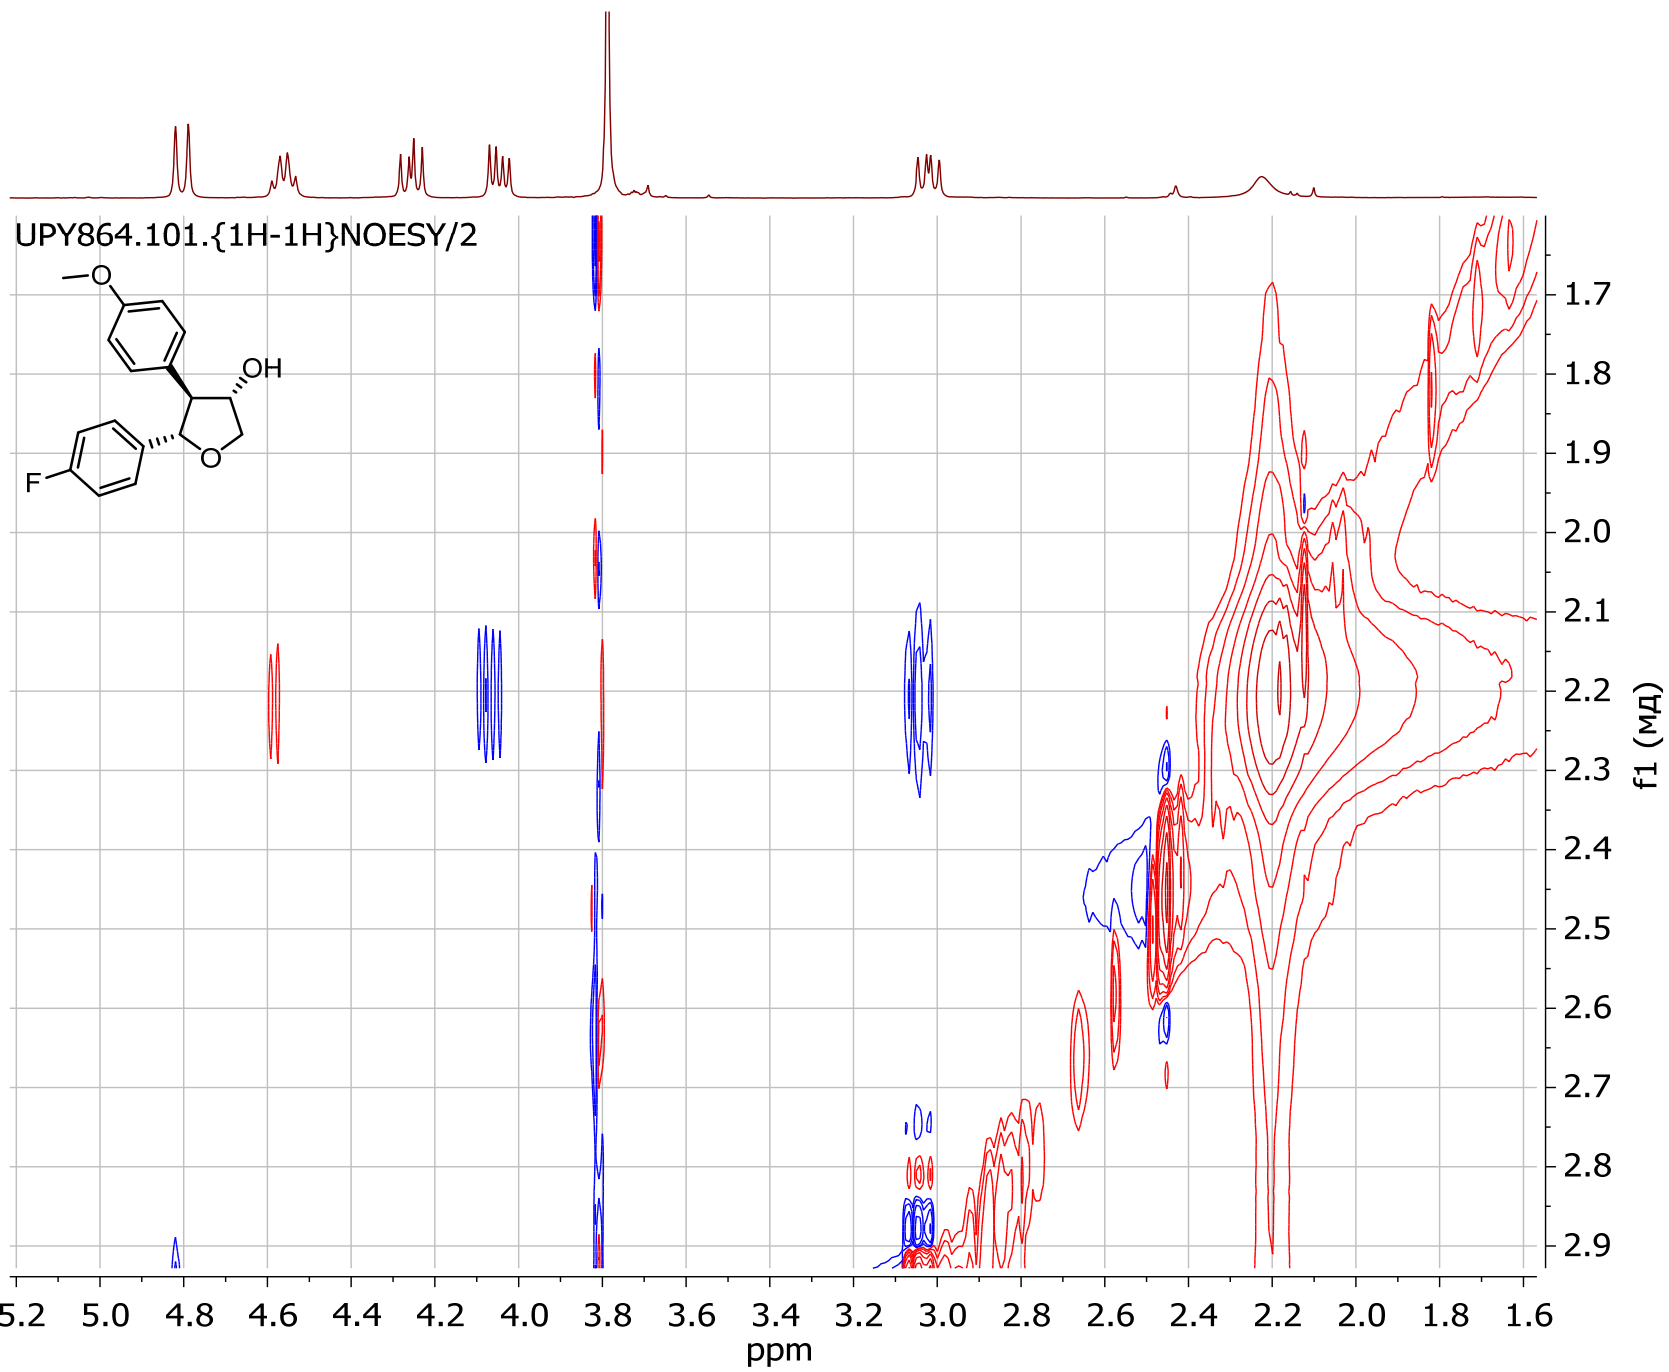

S158
